# Supplementary material for: Amino acid residues in five separate HLA genes can explain most of the known associations between the MHC and primary biliary cholangitis
Source: PLoS Genet. 2018 Dec 3;14(12):e1007833. doi: 10.1371/journal.pgen.1007833 (PMC6292650; doi:10.1371/journal.pgen.1007833)
Supplement: S1 Spreadsheet — (XLSX) [file pgen.1007833.s029.xlsx]

## Sheet: Fig1spreadsheet
AminoAcid	genepos	gene.x	posn.x	AAno.x	mgordered.order.y	AAno.y	nullAIC	altAIC	Pval	ConditionOn1$Pval	ConditionOn2$Pval	ConditionOn3$Pval	ConditionOn4$Pval	ConditionOn5$Pval
A.200	A-20	A	-20	1	1	1	12832.9	12834.8	0.829693	0.815096	0.906482	0.968197	0.923805	0.618302
A.20A	A-20	A	-20	2	1	2	12832.9	12834.9	0.850776	0.832193	0.924193	0.951365	0.905259	0.600988
A.20P	A-20	A	-20	3	1	3	12832.9	12834.4	0.473524	0.533099	0.50596	0.533377	0.497181	0.517845
A.150	A-15	A	-15	4	2	4	12832.9	12831.1	0.051245	0.102462	0.0723458	0.0717206	0.292497	0.326793
A.15L	A-15	A	-15	5	2	5	12832.9	12830.9	0.0456659	0.0925948	0.0682989	0.0735309	0.312703	0.394736
A.15V	A-15	A	-15	6	2	6	12832.9	12834.9	0.972447	0.949885	0.960393	0.830815	0.773876	0.501791
A.110	A-11	A	-11	7	3	7	12832.9	12831.1	0.051245	0.102462	0.0723458	0.0717206	0.292497	0.326793
A.11L	A-11	A	-11	9	3	9	12832.9	12834.6	0.578086	0.479152	0.474251	0.546205	0.519685	0.59918
A.11S	A-11	A	-11	8	3	8	12832.9	12831.1	0.0506352	0.101003	0.071269	0.0709083	0.289903	0.324688
A.20	A-2	A	-2	10	4	10	12832.9	12831.1	0.051245	0.102462	0.0723458	0.0717206	0.292497	0.326793
A.2R	A-2	A	-2	12	4	12	12832.9	12834.6	0.578086	0.479152	0.474251	0.546205	0.519685	0.59918
A.2W	A-2	A	-2	11	4	11	12832.9	12831.1	0.0506352	0.101003	0.071269	0.0709083	0.289903	0.324688
A9F	A9	A	9	13	5	13	12832.9	12828	0.00847859	0.13277	0.101102	0.189889	0.287463	0.168935
A9S	A9	A	9	14	5	14	12832.9	12832.6	0.130746	0.245691	0.37763	0.409735	0.528216	0.394186
A9T	A9	A	9	16	5	16	12832.9	12834.7	0.705385	0.381076	0.778691	0.275164	0.62057	0.643294
A9Y	A9	A	9	15	5	15	12832.9	12831.5	0.0666779	0.117953	0.118798	0.0770611	0.235477	0.168654
A12M	A12	A	12	18	6	18	12832.9	12834.2	0.415124	0.321068	0.285518	0.163726	0.459495	0.145619
A12V	A12	A	12	17	6	17	12832.9	12834.2	0.415124	0.321068	0.285518	0.163726	0.459495	0.145619
A17C	A17	A	17	21	7	21	12832.9	12832.5	0.120984	0.30934	0.260096	0.157723	0.206863	0.165008
A17R	A17	A	17	19	7	19	12832.9	12834.7	0.683785	0.61232	0.545864	0.966203	0.888565	0.978709
A17S	A17	A	17	20	7	20	12832.9	12834.7	0.701727	0.623821	0.557958	0.984003	0.872818	0.96118
A19K	A19	A	19	23	8	23	12832.9	12834.9	0.851936	0.923019	0.803275	0.6894	0.629104	0.674406
A19P	A19	A	19	22	8	22	12832.9	12834.9	0.851936	0.923019	0.803275	0.6894	0.629104	0.674406
A31S	A31	A	31	25	9	25	12832.9	12834.4	0.473524	0.533099	0.50596	0.533377	0.497181	0.517845
A31T	A31	A	31	24	9	24	12832.9	12834.4	0.473524	0.533099	0.50596	0.533377	0.497181	0.517845
A35Q	A35	A	35	27	10	27	12832.9	12834.4	0.473524	0.533099	0.50596	0.533377	0.497181	0.517845
A35R	A35	A	35	26	10	26	12832.9	12834.4	0.473524	0.533099	0.50596	0.533377	0.497181	0.517845
A43Q	A43	A	43	28	11	28	12832.9	12834.9	0.975468	0.712368	0.79412	0.631633	0.922923	0.959752
A43R	A43	A	43	29	11	29	12832.9	12834.9	0.975468	0.712368	0.79412	0.631633	0.922923	0.959752
A44K	A44	A	44	30	12	30	12832.9	12813.4	3.59241e-06	7.83085e-05	0.00129735	1.04404e-05	0.00431202	0.0040427
A44R	A44	A	44	31	12	31	12832.9	12813.4	3.59241e-06	7.83085e-05	0.00129735	1.04404e-05	0.00431202	0.0040427
A45Q	A45	A	45	32	13	32	12832.9	12829.8	0.0241904	0.0135709	0.0224059	0.00948972	0.00245558	0.00221224
A45R	A45	A	45	33	13	33	12832.9	12829.8	0.0241904	0.0135709	0.0224059	0.00948972	0.00245558	0.00221224
A56E	A56	A	56	36	14	36	12832.9	12834.4	0.473524	0.533099	0.50596	0.533377	0.497181	0.517845
A56G	A56	A	56	34	14	34	12832.9	12829.2	0.0174559	0.0405648	0.0174999	0.0993696	0.0851213	0.0711946
A56R	A56	A	56	35	14	35	12832.9	12829.2	0.0171081	0.0399775	0.0172123	0.0982189	0.0840022	0.0702045
A62E	A62	A	62	39	15	39	12832.9	12832.8	0.144865	0.306541	0.503173	0.376683	0.44654	0.342434
A62G	A62	A	62	38	15	38	12832.9	12829.7	0.0232542	0.0106618	0.0818304	0.00932664	0.0561473	0.0744355
A62L	A62	A	62	41	15	41	12832.9	12833.2	0.193936	0.0109646	0.0349212	0.00808078	0.0592047	0.0599065
A62Q	A62	A	62	37	15	37	12832.9	12828.6	0.0119461	0.0391083	0.223171	0.0383841	0.140713	0.0943376
A62R	A62	A	62	40	15	40	12832.9	12834.9	0.926491	0.869775	0.941709	0.735884	0.991696	0.729073
A63E	A63	A	63	42	16	42	12832.9	12834.4	0.493602	0.171884	0.235942	0.198969	0.265127	0.415796
A63N	A63	A	63	43	16	43	12832.9	12834.9	0.926491	0.869775	0.941709	0.735884	0.991696	0.729073
A63Q	A63	A	63	44	16	44	12832.9	12833.2	0.193936	0.0109646	0.0349212	0.00808078	0.0592047	0.0599065
A65G	A65	A	65	46	17	46	12832.9	12832.7	0.143426	0.304525	0.500418	0.374507	0.443884	0.340122
A65R	A65	A	65	45	17	45	12832.9	12832.7	0.143426	0.304525	0.500418	0.374507	0.443884	0.340122
A66K	A66	A	66	48	18	48	12832.9	12825.8	0.00253965	0.00248771	0.0403734	0.00276569	0.023113	0.0234654
A66N	A66	A	66	47	18	47	12832.9	12825.8	0.00253965	0.00248771	0.0403734	0.00276569	0.023113	0.0234654
A67M	A67	A	67	49	19	49	12832.9	12813.4	3.59241e-06	7.83085e-05	0.00129735	1.04404e-05	0.00431202	0.0040427
A67V	A67	A	67	50	19	50	12832.9	12813.4	3.59241e-06	7.83085e-05	0.00129735	1.04404e-05	0.00431202	0.0040427
A68K	A68	A	68	51	20	51	12832.9	12834.5	0.522207	0.562407	0.366668	0.358173	0.39284	0.438406
A68R	A68	A	68	52	20	52	12832.9	12834.5	0.522207	0.562407	0.366668	0.358173	0.39284	0.438406
A70H	A70	A	70	53	21	53	12832.9	12834.8	0.743106	0.407193	0.571419	0.742812	0.589331	0.47603
A70Q	A70	A	70	54	21	54	12832.9	12834.8	0.743106	0.407193	0.571419	0.742812	0.589331	0.47603
A73I	A73	A	73	56	22	56	12832.9	12831	0.0492645	0.12912	0.0564228	0.184555	0.182635	0.16943
A73T	A73	A	73	55	22	55	12832.9	12831	0.0492645	0.12912	0.0564228	0.184555	0.182635	0.16943
A74D	A74	A	74	57	23	57	12832.9	12829.8	0.0235881	0.0108084	0.0825857	0.00940946	0.0564377	0.0748719
A74H	A74	A	74	58	23	58	12832.9	12829.7	0.023369	0.0107172	0.0820707	0.00933271	0.056046	0.0743665
A74N	A74	A	74	59	23	59	12832.9	12834.4	0.473524	0.533099	0.50596	0.533377	0.497181	0.517845
A76A	A76	A	76	60	24	60	12832.9	12809.6	4.83116e-07	8.17667e-07	4.03399e-05	4.01591e-08	0.000131688	0.000135347
A76E	A76	A	76	62	24	62	12832.9	12831.9	0.0865302	0.161462	0.240033	0.170349	0.398258	0.230024
A76V	A76	A	76	61	24	61	12832.9	12825.5	0.00214606	0.00132923	0.00788305	0.000218077	0.0101938	0.0213685
A77D	A77	A	77	64	25	64	12832.9	12825.5	0.00214606	0.00132923	0.00788305	0.000218077	0.0101938	0.0213685
A77N	A77	A	77	63	25	63	12832.9	12824.3	0.00111356	0.000818923	0.00492333	6.86504e-05	0.0083461	0.0126144
A77S	A77	A	77	65	25	65	12832.9	12834.9	0.889631	0.988601	0.921309	0.783343	0.906797	0.866279
A79A	A79	A	79	68	26	68	12832.9	12834.9	0.898417	0.756612	0.705063	0.816714	0.9814	0.891114
A79G	A79	A	79	66	26	66	12832.9	12833.2	0.196857	0.390568	0.535996	0.366814	0.580757	0.372528
A79R	A79	A	79	67	26	67	12832.9	12833.2	0.197431	0.394296	0.541796	0.369407	0.580676	0.373899
A80I	A80	A	80	70	27	70	12832.9	12833.2	0.197431	0.394296	0.541796	0.369407	0.580676	0.373899
A80T	A80	A	80	69	27	69	12832.9	12833.2	0.197431	0.394296	0.541796	0.369407	0.580676	0.373899
A81A	A81	A	81	72	28	72	12832.9	12833.2	0.197431	0.394296	0.541796	0.369407	0.580676	0.373899
A81L	A81	A	81	71	28	71	12832.9	12833.2	0.197431	0.394296	0.541796	0.369407	0.580676	0.373899
A82L	A82	A	82	74	29	74	12832.9	12833.2	0.197431	0.394296	0.541796	0.369407	0.580676	0.373899
A82R	A82	A	82	73	29	73	12832.9	12833.2	0.197431	0.394296	0.541796	0.369407	0.580676	0.373899
A83G	A83	A	83	75	30	75	12832.9	12833.2	0.197431	0.394296	0.541796	0.369407	0.580676	0.373899
A83R	A83	A	83	76	30	76	12832.9	12833.2	0.197431	0.394296	0.541796	0.369407	0.580676	0.373899
A90A	A90	A	90	78	31	78	12832.9	12823.4	0.000713395	0.00413696	0.0305078	0.00172314	0.0272827	0.0245813
A90D	A90	A	90	77	31	77	12832.9	12823.4	0.000713395	0.00413696	0.0305078	0.00172314	0.0272827	0.0245813
A95I	A95	A	95	79	32	79	12832.9	12825.7	0.00248946	0.00242043	0.0394561	0.00265017	0.022524	0.0227879
A95L	A95	A	95	81	32	81	12832.9	12833	0.164393	0.386385	0.572445	0.482646	0.47884	0.350219
A95V	A95	A	95	80	32	80	12832.9	12829.6	0.0214386	0.0077664	0.0687889	0.00617499	0.0503406	0.0720054
A970	A97	A	97	84	33	84	12832.9	12834.3	0.435705	0.429116	0.487189	0.359382	0.485806	0.370168
A97I	A97	A	97	82	33	82	12832.9	12820.4	0.000138204	0.00212387	0.0195496	0.00216714	0.0188861	0.00738635
A97M	A97	A	97	85	33	85	12832.9	12829.7	0.0232248	0.324713	0.313182	0.425137	0.397978	0.245817
A97R	A97	A	97	83	33	83	12832.9	12831.4	0.061002	0.0239286	0.138114	0.0153275	0.101176	0.090358
A99F	A99	A	99	87	34	87	12832.9	12832.7	0.142035	0.302196	0.4971	0.369279	0.438325	0.33566
A99Y	A99	A	99	86	34	86	12832.9	12832.7	0.142035	0.302196	0.4971	0.369279	0.438325	0.33566
A102D	A102	A	102	88	35	88	12832.9	12827.9	0.00805022	0.0128284	0.0195788	0.0142864	0.0116057	0.00853794
A102H	A102	A	102	89	35	89	12832.9	12827.9	0.00805022	0.0128284	0.0195788	0.0142864	0.0116057	0.00853794
A105P	A105	A	105	90	36	90	12832.9	12827.1	0.00531865	0.0176849	0.093929	0.0110537	0.0505985	0.0787675
A105S	A105	A	105	91	36	91	12832.9	12827.1	0.00531865	0.0176849	0.093929	0.0110537	0.0505985	0.0787675
A107G	A107	A	107	92	37	92	12832.9	12829.7	0.022885	0.0104247	0.0802346	0.00903269	0.0552909	0.0730457
A107W	A107	A	107	93	37	93	12832.9	12829.7	0.022885	0.0104247	0.0802346	0.00903269	0.0552909	0.0730457
A109F	A109	A	109	94	38	94	12832.9	12834.5	0.533017	0.708235	0.685529	0.671189	0.915359	0.838566
A109L	A109	A	109	95	38	95	12832.9	12834.5	0.533017	0.708235	0.685529	0.671189	0.915359	0.838566
A114E	A114	A	114	99	39	99	12832.9	12834.7	0.682684	0.606968	0.540426	0.959262	0.894821	0.982093
A114H	A114	A	114	97	39	97	12832.9	12824.9	0.001615	0.00142526	0.025903	0.00125853	0.0161694	0.0121645
A114Q	A114	A	114	98	39	98	12832.9	12834.3	0.42921	0.607364	0.454767	0.602413	0.850246	0.620737
A114R	A114	A	114	96	39	96	12832.9	12820.9	0.000180076	0.000281148	0.00422015	0.000429366	0.0138252	0.00513981
A116D	A116	A	116	100	40	100	12832.9	12824.3	0.00114134	0.000899602	0.0166816	0.00131944	0.0190114	0.0131394
A116H	A116	A	116	102	40	102	12832.9	12834.7	0.682684	0.606968	0.540426	0.959262	0.894821	0.982093
A116Y	A116	A	116	101	40	101	12832.9	12824.9	0.001615	0.00142526	0.025903	0.00125853	0.0161694	0.0121645
A127K	A127	A	127	104	41	104	12832.9	12820.8	0.00017315	0.000211561	0.00781304	0.000166215	0.00309369	0.00204261
A127N	A127	A	127	103	41	103	12832.9	12820.8	0.00017315	0.000211561	0.00781304	0.000166215	0.00309369	0.00204261
A142I	A142	A	142	105	42	105	12832.9	12825.9	0.00267494	0.00129629	0.0191224	0.000798622	0.00976945	0.00935656
A142T	A142	A	142	106	42	106	12832.9	12825.9	0.00267494	0.00129629	0.0191224	0.000798622	0.00976945	0.00935656
A144K	A144	A	144	107	43	107	12832.9	12834.6	0.566716	0.696422	0.874211	0.508733	0.378458	0.572688
A144Q	A144	A	144	108	43	108	12832.9	12834.6	0.566716	0.696422	0.874211	0.508733	0.378458	0.572688
A145H	A145	A	145	110	44	110	12832.9	12825.9	0.00267494	0.00129629	0.0191224	0.000798622	0.00976945	0.00935656
A145R	A145	A	145	109	44	109	12832.9	12825.9	0.00267494	0.00129629	0.0191224	0.000798622	0.00976945	0.00935656
A149A	A149	A	149	111	45	111	12832.9	12833.3	0.20667	0.294595	0.298715	0.36033	0.345014	0.425394
A149T	A149	A	149	112	45	112	12832.9	12833.3	0.20667	0.294595	0.298715	0.36033	0.345014	0.425394
A150A	A150	A	150	114	46	114	12832.9	12813.4	3.59241e-06	7.83085e-05	0.00129735	1.04404e-05	0.00431202	0.0040427
A150V	A150	A	150	113	46	113	12832.9	12813.4	3.59241e-06	7.83085e-05	0.00129735	1.04404e-05	0.00431202	0.0040427
A151H	A151	A	151	115	47	115	12832.9	12833.1	0.183635	0.907649	0.478789	0.784414	0.613795	0.807495
A151R	A151	A	151	116	47	116	12832.9	12833.1	0.183635	0.907649	0.478789	0.784414	0.613795	0.807495
A152A	A152	A	152	117	48	117	12832.9	12826	0.00293074	0.0113173	0.0730925	0.00402318	0.0600568	0.0460419
A152E	A152	A	152	119	48	119	12832.9	12829.9	0.0261665	0.0848668	0.096608	0.270922	0.206581	0.132034
A152R	A152	A	152	121	48	121	12832.9	12832.4	0.114515	0.0525414	0.0540771	0.10906	0.377719	0.338982
A152V	A152	A	152	118	48	118	12832.9	12817.1	2.42494e-05	0.00060856	0.00660043	0.000699792	0.00695954	0.00302948
A152W	A152	A	152	120	48	120	12832.9	12833.8	0.289868	0.195113	0.233772	0.0959597	0.20524	0.227216
A156L	A156	A	156	123	49	123	12832.9	12831.6	0.0693004	0.113315	0.201261	0.0748234	0.435591	0.569123
A156Q	A156	A	156	125	49	125	12832.9	12830.6	0.0395248	0.0949219	0.172009	0.0872012	0.168831	0.168775
A156R	A156	A	156	122	49	122	12832.9	12813.4	3.59241e-06	7.83085e-05	0.00129735	1.04404e-05	0.00431202	0.0040427
A156W	A156	A	156	124	49	124	12832.9	12834.5	0.559801	0.605127	0.673092	0.469672	0.505444	0.289626
A158A	A158	A	158	127	50	127	12832.9	12813.4	3.59241e-06	7.83085e-05	0.00129735	1.04404e-05	0.00431202	0.0040427
A158V	A158	A	158	126	50	126	12832.9	12813.4	3.59241e-06	7.83085e-05	0.00129735	1.04404e-05	0.00431202	0.0040427
A161D	A161	A	161	129	51	129	12832.9	12831.9	0.0828674	0.193101	0.218878	0.500663	0.406859	0.233654
A161E	A161	A	161	128	51	128	12832.9	12831.9	0.0828674	0.193101	0.218878	0.500663	0.406859	0.233654
A163E	A163	A	163	132	52	132	12832.9	12832.9	0.155032	0.162312	0.119706	0.137388	0.142255	0.17607
A163R	A163	A	163	130	52	130	12832.9	12824	0.000993468	0.00528104	0.0365466	0.00225353	0.033603	0.0302552
A163T	A163	A	163	131	52	131	12832.9	12824	0.000972935	0.00519715	0.0360616	0.00221454	0.0331614	0.0298535
A166D	A166	A	166	133	53	133	12832.9	12825.4	0.00203708	0.00575927	0.0186241	0.00119374	0.0523173	0.0652975
A166E	A166	A	166	134	53	134	12832.9	12825.4	0.00203708	0.00575927	0.0186241	0.00119374	0.0523173	0.0652975
A167G	A167	A	167	135	54	135	12832.9	12825.4	0.00203708	0.00575927	0.0186241	0.00119374	0.0523173	0.0652975
A167W	A167	A	167	136	54	136	12832.9	12825.4	0.00203708	0.00575927	0.0186241	0.00119374	0.0523173	0.0652975
A171H	A171	A	171	138	55	138	12832.9	12832.3	0.109966	0.119157	0.162403	0.0753223	0.0193091	0.0205411
A171Y	A171	A	171	137	55	137	12832.9	12832.3	0.109966	0.119157	0.162403	0.0753223	0.0193091	0.0205411
A177E	A177	A	177	139	56	139	12832.9	12834.7	0.670506	0.5983	0.616554	0.617624	0.620821	0.596519
A177K	A177	A	177	140	56	140	12832.9	12834.7	0.670506	0.5983	0.616554	0.617624	0.620821	0.596519
A1840	A184	A	184	141	57	141	12832.9	12824.9	0.00159882	0.000866175	0.00877642	0.000475244	0.0179298	0.0292268
A184A	A184	A	184	143	57	143	12832.9	12830.1	0.0278836	0.0108145	0.0864113	0.00802197	0.0617522	0.0799045
A184P	A184	A	184	142	57	142	12832.9	12830.7	0.0406462	0.0813619	0.0573154	0.0618606	0.272938	0.340842
A1860	A186	A	186	144	58	144	12832.9	12824.9	0.00159882	0.000866175	0.00877642	0.000475244	0.0179298	0.0292268
A186K	A186	A	186	145	58	145	12832.9	12824.8	0.00146608	0.000781858	0.0081193	0.000423701	0.0162026	0.0265274
A186R	A186	A	186	146	58	146	12832.9	12829.8	0.0241904	0.0135709	0.0224059	0.00948972	0.00245558	0.00221224
A1930	A193	A	193	147	59	147	12832.9	12824.9	0.001612	0.000873138	0.00881427	0.000479355	0.0181607	0.0294458
A193A	A193	A	193	149	59	149	12832.9	12830.2	0.0298862	0.0118061	0.0917902	0.00884432	0.0675144	0.0871344
A193P	A193	A	193	148	59	148	12832.9	12830.5	0.0364217	0.0726711	0.0512337	0.0545275	0.246381	0.307729
A1940	A194	A	194	150	60	150	12832.9	12824.9	0.001612	0.000873138	0.00881427	0.000479355	0.0181607	0.0294458
A194I	A194	A	194	151	60	151	12832.9	12830.5	0.0364217	0.0726711	0.0512337	0.0545275	0.246381	0.307729
A194V	A194	A	194	152	60	152	12832.9	12830.2	0.0298862	0.0118061	0.0917902	0.00884432	0.0675144	0.0871344
A2070	A207	A	207	153	61	153	12832.9	12824.9	0.001612	0.000873138	0.00881427	0.000479355	0.0181607	0.0294458
A207G	A207	A	207	154	61	154	12832.9	12830.6	0.0378519	0.0799611	0.0591761	0.0629086	0.276996	0.34858
A207S	A207	A	207	155	61	155	12832.9	12830.1	0.028795	0.0108781	0.0843095	0.00786597	0.0613633	0.0786172
A2450	A245	A	245	156	62	156	12832.9	12824.9	0.001612	0.000873138	0.00881427	0.000479355	0.0181607	0.0294458
A245A	A245	A	245	157	62	157	12832.9	12825	0.00164978	0.000887811	0.00891343	0.000489382	0.0183881	0.029852
A245V	A245	A	245	158	62	158	12832.9	12834.1	0.371866	0.612748	0.674099	0.530367	0.585934	0.485522
A2460	A246	A	246	159	63	159	12832.9	12825	0.00161997	0.000877223	0.00885368	0.000481856	0.018242	0.0296105
A246A	A246	A	246	160	63	160	12832.9	12824.5	0.00127424	0.000678803	0.00756794	0.000406962	0.0160148	0.0289061
A246G	A246	A	246	162	63	162	12832.9	12834.8	0.757836	0.603821	0.493063	0.494794	0.472604	0.420958
A246S	A246	A	246	161	63	161	12832.9	12833.9	0.320806	0.252302	0.292388	0.321294	0.303398	0.491806
A2530	A253	A	253	163	64	163	12832.9	12824.9	0.001612	0.000873138	0.00881427	0.000479355	0.0181607	0.0294458
A253E	A253	A	253	164	64	164	12832.9	12825	0.00168685	0.000960544	0.00983073	0.000550286	0.0202287	0.0330143
A253K	A253	A	253	166	64	166	12832.9	12834.4	0.473524	0.533099	0.50596	0.533377	0.497181	0.517845
A253Q	A253	A	253	165	64	165	12832.9	12834.8	0.757836	0.603821	0.493063	0.494794	0.472604	0.420958
A2550	A255	A	255	167	65	167	12832.9	12824.9	0.001612	0.000873138	0.00881427	0.000479355	0.0181607	0.0294458
A255K	A255	A	255	169	65	169	12832.9	12834.4	0.473524	0.533099	0.50596	0.533377	0.497181	0.517845
A255Q	A255	A	255	168	65	168	12832.9	12824.9	0.00159295	0.000864241	0.00874135	0.00047451	0.0180175	0.0292232
A2680	A268	A	268	170	66	170	12832.9	12824.9	0.001612	0.000873138	0.00881427	0.000479355	0.0181607	0.0294458
A268E	A268	A	268	172	66	172	12832.9	12834.4	0.473524	0.533099	0.50596	0.533377	0.497181	0.517845
A268K	A268	A	268	171	66	171	12832.9	12824.9	0.00159295	0.000864241	0.00874135	0.00047451	0.0180175	0.0292232
A2760	A276	A	276	173	67	173	12832.9	12831.4	0.0600503	0.117075	0.0826605	0.0814027	0.322598	0.354146
A276L	A276	A	276	174	67	174	12832.9	12830.8	0.0422778	0.0817477	0.0572793	0.0622792	0.273337	0.343952
A276P	A276	A	276	175	67	175	12832.9	12834.5	0.556191	0.467885	0.497088	0.63652	0.652829	0.972928
A2820	A282	A	282	176	68	176	12832.9	12831.5	0.0671857	0.130823	0.0921996	0.0923979	0.358816	0.393133
A282I	A282	A	282	177	68	177	12832.9	12831.8	0.0774916	0.145564	0.102405	0.104392	0.393833	0.435972
A282V	A282	A	282	178	68	178	12832.9	12831.6	0.071967	0.124789	0.163519	0.100508	0.0651164	0.0308685
A2940	A294	A	294	179	69	179	12832.9	12831.5	0.0671857	0.130823	0.0921996	0.0923979	0.358816	0.393133
A294F	A294	A	294	181	69	181	12832.9	12833.6	0.256335	0.205266	0.242049	0.292525	0.2615	0.441771
A294L	A294	A	294	180	69	180	12832.9	12830.5	0.0365559	0.0731076	0.0514559	0.0549153	0.247579	0.309101
A2980	A298	A	298	182	70	182	12832.9	12831.5	0.0671857	0.130823	0.0921996	0.0923979	0.358816	0.393133
A298F	A298	A	298	184	70	184	12832.9	12834.6	0.578086	0.479152	0.474251	0.546205	0.519685	0.59918
A298I	A298	A	298	183	70	183	12832.9	12831.5	0.0664221	0.129055	0.0908887	0.0914002	0.355852	0.390769
A2990	A299	A	299	185	71	185	12832.9	12831.5	0.0671857	0.130823	0.0921996	0.0923979	0.358816	0.393133
A299A	A299	A	299	187	71	187	12832.9	12834.3	0.445907	0.366615	0.394138	0.477882	0.523315	0.768774
A299T	A299	A	299	186	71	186	12832.9	12830.9	0.0470049	0.0913706	0.0637118	0.0678402	0.298692	0.360982
A3070	A307	A	307	188	72	188	12832.9	12831.5	0.0671857	0.130823	0.0921996	0.0923979	0.358816	0.393133
A307M	A307	A	307	189	72	189	12832.9	12831.5	0.0664221	0.129055	0.0908887	0.0914002	0.355852	0.390769
A307R	A307	A	307	190	72	190	12832.9	12834.6	0.578086	0.479152	0.474251	0.546205	0.519685	0.59918
A3100	A310	A	310	191	73	191	12832.9	12831.5	0.0671857	0.130823	0.0921996	0.0923979	0.358816	0.393133
A310K	A310	A	310	193	73	193	12832.9	12834.4	0.473524	0.533099	0.50596	0.533377	0.497181	0.517845
A310R	A310	A	310	192	73	192	12832.9	12831.5	0.0662724	0.129556	0.0912318	0.0914932	0.356108	0.390203
A3110	A311	A	311	194	74	194	12832.9	12831.5	0.0671857	0.130823	0.0921996	0.0923979	0.358816	0.393133
A311K	A311	A	311	195	74	195	12832.9	12831.8	0.0774916	0.145564	0.102405	0.104392	0.393833	0.435972
A311N	A311	A	311	196	74	196	12832.9	12831.6	0.071967	0.124789	0.163519	0.100508	0.0651164	0.0308685
A3140	A314	A	314	197	75	197	12832.9	12831.5	0.0671857	0.130823	0.0921996	0.0923979	0.358816	0.393133
A314D	A314	A	314	198	75	198	12832.9	12831.5	0.0662724	0.129556	0.0912318	0.0914932	0.356108	0.390203
A314V	A314	A	314	199	75	199	12832.9	12834.4	0.473524	0.533099	0.50596	0.533377	0.497181	0.517845
A3210	A321	A	321	200	76	200	12832.9	12831.5	0.0667909	0.130154	0.0918401	0.0922575	0.359627	0.393832
A321S	A321	A	321	202	76	202	12832.9	12834.2	0.403149	0.314949	0.349551	0.439447	0.418944	0.685586
A321T	A321	A	321	201	76	201	12832.9	12830.8	0.04195	0.0811752	0.0569562	0.062107	0.273829	0.344478
A3340	A334	A	334	203	77	203	12832.9	12831.5	0.0667909	0.130154	0.0918401	0.0922575	0.359627	0.393832
A334M	A334	A	334	205	77	205	12832.9	12834.4	0.466986	0.381628	0.410037	0.494676	0.542904	0.793054
A334S	A334	A	334	206	77	206	12832.9	12829.8	0.0241904	0.0135709	0.0224059	0.00948972	0.00245558	0.00221224
A334V	A334	A	334	204	77	204	12832.9	12830.8	0.0419716	0.0812738	0.0569523	0.0597062	0.269076	0.326777
C.180	C-18	C	-18	391	78	391	12832.9	12812.2	1.86875e-06	1.38821e-05	3.05715e-07	0.00115733	0.168411	0.0253735
C.18Q	C-18	C	-18	393	78	393	12832.9	12834.9	0.871653	0.946719	0.925494	0.788851	0.570421	0.233883
C.18R	C-18	C	-18	392	78	392	12832.9	12812.1	1.83468e-06	1.40246e-05	3.10917e-07	0.00113243	0.163837	0.0233553
C.170	C-17	C	-17	394	79	394	12832.9	12812.1	1.84989e-06	1.37257e-05	3.01897e-07	0.00114557	0.167427	0.025168
C.17A	C-17	C	-17	396	79	396	12832.9	12812.7	2.51028e-06	1.75239e-05	3.91814e-07	0.00136119	0.18222	0.0279782
C.17T	C-17	C	-17	395	79	395	12832.9	12833.8	0.302203	0.365894	0.39517	0.424207	0.48923	0.529613
C.150	C-15	C	-15	397	80	397	12832.9	12812.4	2.07615e-06	1.48357e-05	3.2225e-07	0.00119196	0.173852	0.0266789
C.15I	C-15	C	-15	399	80	399	12832.9	12834.8	0.812337	0.975152	0.98246	0.857832	0.809562	0.741216
C.15L	C-15	C	-15	398	80	398	12832.9	12812.5	2.18253e-06	1.47785e-05	3.19381e-07	0.00114632	0.169263	0.0253378
C.90	C-9	C	-9	400	81	400	12832.9	12812.2	1.86875e-06	1.38821e-05	3.05715e-07	0.00115733	0.168411	0.0253735
C.9A	C-9	C	-9	401	81	401	12832.9	12833.8	0.302203	0.365894	0.39517	0.424207	0.48923	0.529613
C.9G	C-9	C	-9	402	81	402	12832.9	12812.7	2.48938e-06	1.78987e-05	4.0334e-07	0.00134559	0.178378	0.0259867
C.9I	C-9	C	-9	403	81	403	12832.9	12834.9	0.871653	0.946719	0.925494	0.788851	0.570421	0.233883
C00	C0	C	0	404	82	404	12832.9	12811.8	1.5319e-06	1.12319e-05	2.76377e-07	0.000933833	0.14953	0.0221114
C0C	C0	C	0	405	82	405	12832.9	12812.1	1.83468e-06	1.40246e-05	3.10917e-07	0.00113243	0.163837	0.0233553
C0G	C0	C	0	406	82	406	12832.9	12834.7	0.64387	0.57498	0.731512	0.556139	0.650377	0.799022
C6K	C6	C	6	407	83	407	12832.9	12826.9	0.00472023	0.00467933	0.0185335	0.0344704	0.986503	0.676158
C6R	C6	C	6	408	83	408	12832.9	12826.9	0.00472023	0.00467933	0.0185335	0.0344704	0.986503	0.676158
C9D	C9	C	9	412	84	412	12832.9	12805.7	6.59861e-08	6.08609e-06	5.75856e-06	1.47331e-05	0.648636	0.441418
C9F	C9	C	9	409	84	409	12832.9	12826.9	0.00472023	0.00467933	0.0185335	0.0344704	0.986503	0.676158
C9S	C9	C	9	411	84	411	12832.9	12791.1	3.59019e-11	2.80386e-10	2.43653e-09	2.03766e-07	0.0840639	0.0548023
C9Y	C9	C	9	410	84	410	12832.9	12834.8	0.831457	0.623398	0.932592	0.781275	0.573621	0.56878
C11A	C11	C	11	414	85	414	12832.9	12780.7	1.81555e-13	1.39255e-12	6.5461e-11	9.98342e-09	0.0964482	0.0323892
C11S	C11	C	11	413	85	413	12832.9	12780.7	1.81555e-13	1.39255e-12	6.5461e-11	9.98342e-09	0.0964482	0.0323892
C14R	C14	C	14	415	86	415	12832.9	12796.9	7.04742e-10	4.61783e-09	5.6675e-09	6.20474e-07	0.0990906	0.0618092
C14W	C14	C	14	416	86	416	12832.9	12796.9	7.04742e-10	4.61783e-09	5.6675e-09	6.20474e-07	0.0990906	0.0618092
C16G	C16	C	16	417	87	417	12832.9	12825.8	0.00253824	0.00336254	0.00293006	0.00986083	0.061408	0.166006
C16S	C16	C	16	418	87	418	12832.9	12825.8	0.00253824	0.00336254	0.00293006	0.00986083	0.061408	0.166006
C21H	C21	C	21	420	88	420	12832.9	12834.7	0.689213	0.688262	0.568282	0.478984	0.110819	0.0766771
C21R	C21	C	21	419	88	419	12832.9	12834.7	0.689213	0.688262	0.568282	0.478984	0.110819	0.0766771
C24A	C24	C	24	422	89	422	12832.9	12813.4	3.56339e-06	0.000694487	0.000163457	9.39692e-05	0.100483	0.121133
C24S	C24	C	24	421	89	421	12832.9	12813.4	3.56339e-06	0.000694487	0.000163457	9.39692e-05	0.100483	0.121133
C35Q	C35	C	35	424	90	424	12832.9	12832.2	0.101363	0.0168384	0.00931859	0.000669801	0.109406	0.0379117
C35R	C35	C	35	423	90	423	12832.9	12832.2	0.101363	0.0168384	0.00931859	0.000669801	0.109406	0.0379117
C49A	C49	C	49	425	91	425	12832.9	12810.7	8.80419e-07	2.12927e-05	8.69401e-06	3.67958e-05	0.0101337	0.0131246
C49E	C49	C	49	426	91	426	12832.9	12796.9	7.04742e-10	4.61783e-09	5.6675e-09	6.20474e-07	0.0990906	0.0618092
C49S	C49	C	49	427	91	427	12832.9	12834.8	0.735377	0.802654	0.962852	0.639954	0.0470997	0.0972068
C66K	C66	C	66	428	92	428	12832.9	12834.6	0.57851	0.69381	0.419614	0.249166	0.196583	0.0700049
C66N	C66	C	66	429	92	429	12832.9	12834.6	0.57851	0.69381	0.419614	0.249166	0.196583	0.0700049
C73A	C73	C	73	431	93	431	12832.9	12830.9	0.0468905	0.216917	0.24875	0.299041	0.231033	0.248577
C73T	C73	C	73	430	93	430	12832.9	12830.9	0.0468905	0.216917	0.24875	0.299041	0.231033	0.248577
C77N	C77	C	77	433	94	433	12832.9	12804.6	3.72043e-08	1.92509e-07	1.08886e-07	4.27452e-10	0.00107733	0.00132342
C77S	C77	C	77	432	94	432	12832.9	12804.6	3.72043e-08	1.92509e-07	1.08886e-07	4.27452e-10	0.00107733	0.00132342
C80K	C80	C	80	435	95	435	12832.9	12804.6	3.72043e-08	1.92509e-07	1.08886e-07	4.27452e-10	0.00107733	0.00132342
C80N	C80	C	80	434	95	434	12832.9	12804.6	3.72043e-08	1.92509e-07	1.08886e-07	4.27452e-10	0.00107733	0.00132342
C90A	C90	C	90	436	96	436	12832.9	12832	0.0883732	0.319059	0.30388	0.185744	0.603995	0.7093
C90D	C90	C	90	437	96	437	12832.9	12832	0.0883732	0.319059	0.30388	0.185744	0.603995	0.7093
C91G	C91	C	91	438	97	438	12832.9	12826.8	0.00450268	0.000823183	0.00109843	0.00980542	0.133448	0.0944119
C91R	C91	C	91	439	97	439	12832.9	12826.8	0.00450268	0.000823183	0.00109843	0.00980542	0.133448	0.0944119
C94I	C94	C	94	441	98	441	12832.9	12831.1	0.0507934	0.298968	0.383234	0.601489	0.00761959	0.0093268
C94T	C94	C	94	440	98	440	12832.9	12831.1	0.0507934	0.298968	0.383234	0.601489	0.00761959	0.0093268
C95F	C95	C	95	444	99	444	12832.9	12828.8	0.0137954	0.0278851	0.0320533	0.0705091	0.200247	0.535986
C95I	C95	C	95	443	99	443	12832.9	12830.7	0.0400382	0.290877	0.370952	0.488271	0.00376941	0.0029797
C95L	C95	C	95	442	99	442	12832.9	12833.5	0.23926	0.757537	0.86458	0.929767	0.0176329	0.00742152
C97R	C97	C	97	446	100	446	12832.9	12834.8	0.794277	0.398264	0.520212	0.458835	0.926417	0.928496
C97S	C97	C	97	447	100	447	12832.9	12834.7	0.638	0.477591	0.547721	0.652293	0.671824	0.761929
C97W	C97	C	97	445	100	445	12832.9	12834.8	0.792134	0.400627	0.522533	0.460423	0.928369	0.92987
C99C	C99	C	99	448	101	448	12832.9	12826.9	0.00472023	0.00467933	0.0185335	0.0344704	0.986503	0.676158
C99F	C99	C	99	450	101	450	12832.9	12791.1	3.58499e-11	2.8056e-10	2.43313e-09	2.04237e-07	0.0841647	0.0548484
C99S	C99	C	99	451	101	451	12832.9	12812.7	2.48938e-06	1.78987e-05	4.0334e-07	0.00134559	0.178378	0.0259867
C99Y	C99	C	99	449	101	449	12832.9	12831	0.0486387	0.0348429	0.277563	0.0436379	0.962478	0.756456
C103L	C103	C	103	452	102	452	12832.9	12834.7	0.707574	0.659072	0.564292	0.34312	0.339548	0.407276
C103V	C103	C	103	453	102	453	12832.9	12834.7	0.707574	0.659072	0.564292	0.34312	0.339548	0.407276
C113H	C113	C	113	455	103	455	12832.9	12817.8	3.53425e-05	0.000170222	0.000249082	0.000227925	1.1312e-05	5.91514e-06
C113Y	C113	C	113	454	103	454	12832.9	12817.8	3.53425e-05	0.000170222	0.000249082	0.000227925	1.1312e-05	5.91514e-06
C114D	C114	C	114	456	104	456	12832.9	12804	2.68261e-08	3.51383e-09	1.21233e-09	3.93628e-10	0.807069	0.886816
C114N	C114	C	114	458	104	458	12832.9	12803.9	2.64864e-08	3.45097e-09	1.19202e-09	3.87926e-10	0.803494	0.883589
C114V	C114	C	114	457	104	457	12832.9	12834	0.342226	0.24147	0.28561	0.369299	0.37599	0.430698
C116F	C116	C	116	461	105	461	12832.9	12809.7	5.2453e-07	6.23794e-08	2.0699e-08	3.86938e-09	0.926046	0.718749
C116L	C116	C	116	462	105	462	12832.9	12822.7	0.000476853	0.00155074	0.00247626	0.00266786	0.000217081	0.000145552
C116S	C116	C	116	460	105	460	12832.9	12788.6	1.01263e-11	7.71447e-11	2.0547e-10	3.51193e-10	0.0252279	0.0109015
C116Y	C116	C	116	459	105	459	12832.9	12831.6	0.0690661	0.284512	0.490132	0.79135	0.370667	0.321238
C134I	C134	C	134	464	106	464	12832.9	12833.4	0.219307	0.103351	0.0583574	0.00878988	0.00263587	0.00598439
C134T	C134	C	134	463	106	463	12832.9	12833.4	0.219307	0.103351	0.0583574	0.00878988	0.00263587	0.00598439
C138K	C138	C	138	466	107	466	12832.9	12832.3	0.108207	0.0180494	0.0101653	0.00077456	0.0965499	0.0324146
C138T	C138	C	138	465	107	465	12832.9	12832.3	0.108207	0.0180494	0.0101653	0.00077456	0.0965499	0.0324146
C143S	C143	C	143	468	108	468	12832.9	12834.8	0.786408	0.858846	0.949017	0.633384	0.389938	0.110694
C143T	C143	C	143	467	108	467	12832.9	12834.8	0.786408	0.858846	0.949017	0.633384	0.389938	0.110694
C147L	C147	C	147	470	109	470	12832.9	12801.3	6.95372e-09	4.11599e-06	1.73347e-06	2.12396e-06	0.103137	0.110863
C147W	C147	C	147	469	109	469	12832.9	12801.3	6.95372e-09	4.11599e-06	1.73347e-06	2.12396e-06	0.103137	0.110863
C152A	C152	C	152	472	110	472	12832.9	12789.3	1.43967e-11	6.18765e-10	1.08891e-09	2.66006e-11	0.000337261	0.000272437
C152E	C152	C	152	471	110	471	12832.9	12789.6	1.69703e-11	7.01758e-10	1.2594e-09	3.28421e-11	0.0003898	0.000316896
C152T	C152	C	152	473	110	473	12832.9	12834.2	0.416529	0.510179	0.44366	0.300722	0.270294	0.252811
C156D	C156	C	156	477	111	477	12832.9	12828.8	0.0137954	0.0278851	0.0320533	0.0705091	0.200247	0.535986
C156L	C156	C	156	476	111	476	12832.9	12823.2	0.000613358	0.00255557	0.000910996	0.000302572	0.263434	0.378207
C156Q	C156	C	156	478	111	478	12832.9	12828.8	0.0132534	4.71719e-05	0.000656568	3.4794e-06	0.000236758	0.000293471
C156R	C156	C	156	474	111	474	12832.9	12787.9	7.15799e-12	4.12386e-13	2.70555e-12	2.69541e-12	1	1
C156W	C156	C	156	475	111	475	12832.9	12831.9	0.0838977	0.0482365	0.102459	0.511776	0.18089	0.183592
C163E	C163	C	163	480	112	480	12832.9	12827.3	0.00604291	0.00468362	0.0048203	0.0245456	0.149406	0.468734
C163L	C163	C	163	481	112	481	12832.9	12834.7	0.707574	0.659072	0.564292	0.34312	0.339548	0.407276
C163T	C163	C	163	479	112	479	12832.9	12833.7	0.285139	0.0641656	0.0491694	0.0451176	0.907496	0.699039
C170G	C170	C	170	483	113	483	12832.9	12834.9	0.871653	0.946719	0.925494	0.788851	0.570421	0.233883
C170R	C170	C	170	482	113	482	12832.9	12834.9	0.871653	0.946719	0.925494	0.788851	0.570421	0.233883
C173E	C173	C	173	484	114	484	12832.9	12834.7	0.707574	0.659072	0.564292	0.34312	0.339548	0.407276
C173K	C173	C	173	485	114	485	12832.9	12834.7	0.707574	0.659072	0.564292	0.34312	0.339548	0.407276
C175G	C175	C	175	486	115	486	12832.9	12834	0.347789	0.367273	0.323213	0.230311	0.209465	0.191021
C175R	C175	C	175	487	115	487	12832.9	12834	0.347789	0.367273	0.323213	0.230311	0.209465	0.191021
C177E	C177	C	177	488	116	488	12832.9	12834.3	0.445638	0.115688	0.0732852	0.00756894	0.0478853	0.0318371
C177K	C177	C	177	489	116	489	12832.9	12834.3	0.445638	0.115688	0.0732852	0.00756894	0.0478853	0.0318371
C1840	C184	C	184	491	117	491	12832.9	12821.4	0.000233922	0.00124069	4.07587e-05	0.014562	0.109568	0.0581686
C184H	C184	C	184	490	117	490	12832.9	12828.1	0.0092925	0.0095686	0.0295664	0.0593102	0.876958	0.770754
C184P	C184	C	184	492	117	492	12832.9	12806	7.67982e-08	1.05955e-06	1.99731e-08	0.000199987	0.0772994	0.0177347
C184R	C184	C	184	493	117	493	12832.9	12834.9	0.871653	0.946719	0.925494	0.788851	0.570421	0.233883
C1940	C194	C	194	495	118	495	12832.9	12821.4	0.000233922	0.00124069	4.07587e-05	0.014562	0.109568	0.0581686
C194L	C194	C	194	496	118	496	12832.9	12805.6	6.22353e-08	9.07441e-07	1.6494e-08	0.000177673	0.0730209	0.0167786
C194V	C194	C	194	494	118	494	12832.9	12827.6	0.00708171	0.00790633	0.0248888	0.0501599	0.934999	0.700273
C2190	C219	C	219	498	119	498	12832.9	12821.4	0.000233922	0.00124069	4.07587e-05	0.014562	0.109568	0.0581686
C219R	C219	C	219	499	119	499	12832.9	12805.8	6.97285e-08	9.18051e-07	1.67936e-08	0.000188993	0.0790931	0.0195074
C219W	C219	C	219	497	119	497	12832.9	12827.8	0.00762156	0.00765148	0.0244585	0.0524702	0.879761	0.776671
C2480	C248	C	248	501	120	501	12832.9	12821.4	0.000233922	0.00124069	4.07587e-05	0.014562	0.109568	0.0581686
C248M	C248	C	248	500	120	500	12832.9	12826.9	0.00472023	0.00467933	0.0185335	0.0344704	0.986503	0.676158
C248V	C248	C	248	502	120	502	12832.9	12805.4	5.58399e-08	7.33322e-07	1.52424e-08	0.000149749	0.0682641	0.0166395
C2530	C253	C	253	504	121	504	12832.9	12821.4	0.000233922	0.00124069	4.07587e-05	0.014562	0.109568	0.0581686
C253E	C253	C	253	503	121	503	12832.9	12828.1	0.0092925	0.0095686	0.0295664	0.0593102	0.876958	0.770754
C253Q	C253	C	253	505	121	505	12832.9	12806	7.83882e-08	1.04975e-06	1.96638e-08	0.000204904	0.0797415	0.0192714
C2610	C261	C	261	507	122	507	12832.9	12821.4	0.000233922	0.00124069	4.07587e-05	0.014562	0.109568	0.0581686
C261M	C261	C	261	508	122	508	12832.9	12806	7.67982e-08	1.05955e-06	1.99731e-08	0.000199987	0.0772994	0.0177347
C261V	C261	C	261	506	122	506	12832.9	12828.1	0.00910756	0.00968105	0.0299537	0.0577053	0.898685	0.7281
C2670	C267	C	267	510	123	510	12832.9	12821.4	0.000233922	0.00124069	4.07587e-05	0.014562	0.109568	0.0581686
C267P	C267	C	267	509	123	509	12832.9	12828.1	0.0092925	0.0095686	0.0295664	0.0593102	0.876958	0.770754
C267Q	C267	C	267	511	123	511	12832.9	12806	7.83882e-08	1.04975e-06	1.96638e-08	0.000204904	0.0797415	0.0192714
C2730	C273	C	273	513	124	513	12832.9	12821.4	0.000233922	0.00124069	4.07587e-05	0.014562	0.109568	0.0581686
C273R	C273	C	273	512	124	512	12832.9	12828.1	0.00910756	0.00968105	0.0299537	0.0577053	0.898685	0.7281
C273S	C273	C	273	514	124	514	12832.9	12806	7.67982e-08	1.05955e-06	1.99731e-08	0.000199987	0.0772994	0.0177347
C2750	C275	C	275	515	125	515	12832.9	12805.4	5.51535e-08	7.24397e-07	1.50202e-08	0.000148245	0.0678635	0.0165149
C275E	C275	C	275	516	125	516	12832.9	12804.8	4.04761e-08	5.82352e-07	1.1315e-08	0.000114822	0.0581251	0.0129787
C275G	C275	C	275	518	125	518	12832.9	12834.2	0.416529	0.510179	0.44366	0.300722	0.270294	0.252811
C275K	C275	C	275	517	125	517	12832.9	12834.2	0.422864	0.611073	0.574062	0.462688	0.447027	0.172817
C2850	C285	C	285	519	126	519	12832.9	12805.4	5.58399e-08	7.33322e-07	1.52424e-08	0.000149749	0.0682641	0.0166395
C285L	C285	C	285	522	126	522	12832.9	12834.9	0.871653	0.946719	0.925494	0.788851	0.570421	0.233883
C285M	C285	C	285	521	126	521	12832.9	12806	7.67982e-08	1.05955e-06	1.99731e-08	0.000199987	0.0772994	0.0177347
C285V	C285	C	285	520	126	520	12832.9	12834.5	0.534946	0.500148	0.62566	0.47466	0.573499	0.643861
C2950	C295	C	295	523	127	523	12832.9	12805.4	5.58399e-08	7.33322e-07	1.52424e-08	0.000149749	0.0682641	0.0166395
C295A	C295	C	295	524	127	524	12832.9	12834.6	0.573394	0.510747	0.630675	0.529113	0.67386	0.835808
C295V	C295	C	295	525	127	525	12832.9	12806	7.59453e-08	1.04653e-06	1.97063e-08	0.00019776	0.0767801	0.0175886
C3030	C303	C	303	526	128	526	12832.9	12805.4	5.58399e-08	7.33322e-07	1.52424e-08	0.000149749	0.0682641	0.0166395
C303A	C303	C	303	527	128	527	12832.9	12805.2	5.06215e-08	6.74803e-07	1.37195e-08	0.00014095	0.0668561	0.0162152
C303M	C303	C	303	528	128	528	12832.9	12824.8	0.00153368	0.00359654	0.0011979	0.012217	0.16513	0.165661
C3040	C304	C	304	529	129	529	12832.9	12805.4	5.58399e-08	7.33322e-07	1.52424e-08	0.000149749	0.0682641	0.0166395
C304M	C304	C	304	531	129	531	12832.9	12833.2	0.193272	0.282044	0.278224	0.186337	0.11403	0.0971441
C304V	C304	C	304	530	129	530	12832.9	12804.7	3.95085e-08	5.60709e-07	1.12379e-08	0.00011572	0.0570583	0.013242
C3050	C305	C	305	532	130	532	12832.9	12805.4	5.58399e-08	7.33322e-07	1.52424e-08	0.000149749	0.0682641	0.0166395
C305A	C305	C	305	533	130	533	12832.9	12834.6	0.563684	0.499547	0.618846	0.515918	0.658051	0.819087
C305T	C305	C	305	534	130	534	12832.9	12806	7.67982e-08	1.05955e-06	1.99731e-08	0.000199987	0.0772994	0.0177347
C3060	C306	C	306	535	131	535	12832.9	12805.4	5.58399e-08	7.33322e-07	1.52424e-08	0.000149749	0.0682641	0.0166395
C306A	C306	C	306	537	131	537	12832.9	12806	7.7519e-08	1.03685e-06	1.94012e-08	0.000202626	0.0792088	0.0191142
C306V	C306	C	306	536	131	536	12832.9	12834.5	0.544594	0.511575	0.637775	0.48754	0.588693	0.659618
C3070	C307	C	307	538	132	538	12832.9	12805.4	5.58399e-08	7.33322e-07	1.52424e-08	0.000149749	0.0682641	0.0166395
C307M	C307	C	307	540	132	540	12832.9	12806	7.67982e-08	1.05955e-06	1.99731e-08	0.000199987	0.0772994	0.0177347
C307V	C307	C	307	539	132	539	12832.9	12834.6	0.563684	0.499547	0.618846	0.515918	0.658051	0.819087
C3260	C326	C	326	541	133	541	12832.9	12805.4	5.58399e-08	7.33322e-07	1.52424e-08	0.000149749	0.0682641	0.0166395
C326C	C326	C	326	543	133	543	12832.9	12806	7.67982e-08	1.05955e-06	1.99731e-08	0.000199987	0.0772994	0.0177347
C326S	C326	C	326	542	133	542	12832.9	12834.6	0.563684	0.499547	0.618846	0.515918	0.658051	0.819087
C3390	C339	C	339	544	134	544	12832.9	12805.4	5.58399e-08	7.33322e-07	1.52424e-08	0.000149749	0.0682641	0.0166395
C339A	C339	C	339	545	134	545	12832.9	12834.6	0.563684	0.499547	0.618846	0.515918	0.658051	0.819087
C339T	C339	C	339	546	134	546	12832.9	12806	7.67982e-08	1.05955e-06	1.99731e-08	0.000199987	0.0772994	0.0177347
C3420	C342	C	342	547	135	547	12832.9	12805.4	5.58399e-08	7.33322e-07	1.52424e-08	0.000149749	0.0682641	0.0166395
C342A	C342	C	342	548	135	548	12832.9	12805.2	5.06215e-08	6.74803e-07	1.37195e-08	0.00014095	0.0668561	0.0162152
C342P	C342	C	342	549	135	549	12832.9	12824.8	0.00153368	0.00359654	0.0011979	0.012217	0.16513	0.165661
B.230	B-23	B	-23	207	136	207	12832.9	12833.9	0.324295	0.202078	0.154099	0.157859	0.5573	0.934892
B.23L	B-23	B	-23	208	136	208	12832.9	12834.7	0.687255	0.949142	0.958138	0.750802	0.638558	0.572156
B.23R	B-23	B	-23	209	136	209	12832.9	12833.8	0.292001	0.199845	0.146973	0.140411	0.508751	0.870398
B.210	B-21	B	-21	210	137	210	12832.9	12833.9	0.324295	0.202078	0.154099	0.157859	0.5573	0.934892
B.21M	B-21	B	-21	211	137	211	12832.9	12834.7	0.687255	0.949142	0.958138	0.750802	0.638558	0.572156
B.21T	B-21	B	-21	212	137	212	12832.9	12833.8	0.292001	0.199845	0.146973	0.140411	0.508751	0.870398
B.160	B-16	B	-16	213	138	213	12832.9	12833.9	0.324295	0.202078	0.154099	0.157859	0.5573	0.934892
B.16L	B-16	B	-16	215	138	215	12832.9	12833.5	0.234739	0.152519	0.135757	0.132002	0.250816	0.362336
B.16V	B-16	B	-16	214	138	214	12832.9	12834.5	0.528922	0.394827	0.322999	0.333123	0.828287	0.812969
B.110	B-11	B	-11	216	139	216	12832.9	12833.9	0.324295	0.202078	0.154099	0.157859	0.5573	0.934892
B.11S	B-11	B	-11	217	139	217	12832.9	12834.6	0.563394	0.444367	0.482064	0.533073	0.939903	0.669496
B.11W	B-11	B	-11	218	139	218	12832.9	12834	0.341494	0.229798	0.111935	0.0915191	0.21443	0.393165
B.100	B-10	B	-10	219	140	219	12832.9	12833.9	0.324295	0.202078	0.154099	0.157859	0.5573	0.934892
B.10A	B-10	B	-10	220	140	220	12832.9	12834.7	0.636002	0.481927	0.504079	0.600448	0.891653	0.650793
B.10G	B-10	B	-10	221	140	221	12832.9	12833.8	0.293924	0.220153	0.123933	0.0864371	0.224944	0.428321
B.80	B-8	B	-8	222	141	222	12832.9	12833.9	0.324295	0.202078	0.154099	0.157859	0.5573	0.934892
B.8L	B-8	B	-8	223	141	223	12832.9	12834.4	0.50128	0.391275	0.428831	0.493408	0.976521	0.709345
B.8V	B-8	B	-8	224	141	224	12832.9	12834.3	0.427613	0.294993	0.149076	0.112725	0.243678	0.44446
B4F	B4	B	4	226	142	226	12832.9	12833.2	0.193528	0.150809	0.155784	0.102904	0.0639297	0.0586328
B4S	B4	B	4	225	142	225	12832.9	12833.2	0.193528	0.150809	0.155784	0.102904	0.0639297	0.0586328
B9D	B9	B	9	228	143	228	12832.9	12832.9	0.163185	0.890239	0.633975	0.047778	0.991174	0.903333
B9H	B9	B	9	229	143	229	12832.9	12815.5	1.07106e-05	0.000176118	0.00113399	0.00282043	8.43374e-05	4.64468e-06
B9Y	B9	B	9	227	143	227	12832.9	12827.4	0.00606263	0.00187378	0.00176356	0.237981	0.000348672	1.99889e-05
B11A	B11	B	11	231	144	231	12832.9	12822.8	0.000514591	0.00295298	0.000245077	0.0375977	0.382168	0.271011
B11S	B11	B	11	230	144	230	12832.9	12822.8	0.000514591	0.00295298	0.000245077	0.0375977	0.382168	0.271011
B12M	B12	B	12	233	145	233	12832.9	12821.1	0.00020089	0.0025152	0.000393969	0.0293894	0.110567	0.0892335
B12V	B12	B	12	232	145	232	12832.9	12821.1	0.00020089	0.0025152	0.000393969	0.0293894	0.110567	0.0892335
B24A	B24	B	24	236	146	236	12832.9	12830.4	0.0335806	0.0767557	0.109539	0.0238941	0.252764	0.262421
B24S	B24	B	24	234	146	234	12832.9	12816.4	1.75211e-05	0.00654944	0.00946456	0.00289218	0.338572	0.194
B24T	B24	B	24	235	146	235	12832.9	12828.6	0.0122743	0.237702	0.227726	0.313809	0.926173	0.790435
B30D	B30	B	30	237	147	237	12832.9	12830.4	0.034537	0.00821838	0.00540377	0.0020593	0.00399626	0.00180577
B30G	B30	B	30	238	147	238	12832.9	12830.4	0.034537	0.00821838	0.00540377	0.0020593	0.00399626	0.00180577
B32L	B32	B	32	240	148	240	12832.9	12828.9	0.0146809	0.205497	0.21802	0.210073	0.953765	0.771586
B32Q	B32	B	32	239	148	239	12832.9	12828.9	0.0146809	0.205497	0.21802	0.210073	0.953765	0.771586
B41A	B41	B	41	241	149	241	12832.9	12828.6	0.0119271	0.266346	0.178164	0.227981	0.686697	0.55122
B41T	B41	B	41	242	149	242	12832.9	12828.6	0.0119271	0.266346	0.178164	0.227981	0.686697	0.55122
B45E	B45	B	45	243	150	243	12832.9	12798.5	1.62265e-09	2.26796e-06	1.30247e-06	2.12551e-07	0.000317808	9.00977e-05
B45G	B45	B	45	247	150	247	12832.9	12832.2	0.100948	0.154543	0.303505	0.340859	0.487332	0.507244
B45K	B45	B	45	246	150	246	12832.9	12828.8	0.0134342	0.227732	0.166262	0.141111	0.654094	0.529991
B45M	B45	B	45	244	150	244	12832.9	12831.3	0.0568121	0.0282033	0.080168	0.156824	0.864031	0.591835
B45T	B45	B	45	245	150	245	12832.9	12794.7	2.35372e-10	1.84927e-10	2.98761e-09	2.18763e-09	3.32689e-05	3.13346e-06
B46A	B46	B	46	249	151	249	12832.9	12831.3	0.0568121	0.0282033	0.080168	0.156824	0.864031	0.591835
B46E	B46	B	46	248	151	248	12832.9	12831.3	0.0568121	0.0282033	0.080168	0.156824	0.864031	0.591835
B52I	B52	B	52	250	152	250	12832.9	12832.2	0.100948	0.154543	0.303505	0.340859	0.487332	0.507244
B52V	B52	B	52	251	152	251	12832.9	12832.2	0.100948	0.154543	0.303505	0.340859	0.487332	0.507244
B58A	B58	B	58	253	153	253	12832.9	12834.8	0.732465	0.975321	0.865612	0.768968	0.611279	0.702091
B58E	B58	B	58	252	153	252	12832.9	12834.8	0.732465	0.975321	0.865612	0.768968	0.611279	0.702091
B59H	B59	B	59	255	154	255	12832.9	12833.5	0.236029	0.230967	0.242423	0.268046	0.288703	0.390738
B59Y	B59	B	59	254	154	254	12832.9	12833.5	0.236029	0.230967	0.242423	0.268046	0.288703	0.390738
B62G	B62	B	62	257	155	257	12832.9	12826.7	0.00419026	0.00329473	0.00594195	0.139202	0.549007	0.291595
B62R	B62	B	62	256	155	256	12832.9	12826.7	0.00419026	0.00329473	0.00594195	0.139202	0.549007	0.291595
B63E	B63	B	63	259	156	259	12832.9	12832.9	0.162907	0.961715	0.823893	0.607668	0.741707	0.655303
B63N	B63	B	63	258	156	258	12832.9	12832.9	0.162907	0.961715	0.823893	0.607668	0.741707	0.655303
B65Q	B65	B	65	260	157	260	12832.9	12826.3	0.00336827	0.0027913	0.00551797	0.112171	0.484557	0.267129
B65R	B65	B	65	261	157	261	12832.9	12826.3	0.00336827	0.0027913	0.00551797	0.112171	0.484557	0.267129
B66I	B66	B	66	262	158	262	12832.9	12826.3	0.00342778	0.00283232	0.00556848	0.112819	0.48577	0.267951
B66K	B66	B	66	264	158	264	12832.9	12833	0.167841	0.258533	0.430087	0.465989	0.632357	0.634897
B66N	B66	B	66	263	158	263	12832.9	12826.3	0.00336827	0.0027913	0.00551797	0.112171	0.484557	0.267129
B67C	B67	B	67	266	159	266	12832.9	12834.9	0.900308	0.789362	0.351646	0.133868	0.00461627	0.0142416
B67F	B67	B	67	267	159	267	12832.9	12824.8	0.00149729	5.64826e-05	3.15329e-05	0.0316475	0.088779	0.0352403
B67M	B67	B	67	269	159	269	12832.9	12826.3	0.00336827	0.0027913	0.00551797	0.112171	0.484557	0.267129
B67S	B67	B	67	268	159	268	12832.9	12823.5	0.000749926	0.0277209	0.0111264	0.0115275	0.027258	0.0157414
B67Y	B67	B	67	265	159	265	12832.9	12787.3	5.34007e-12	1.44714e-10	1.10154e-09	7.95466e-05	0.0197278	0.00100123
B69A	B69	B	69	270	160	270	12832.9	12783.2	6.50329e-13	1.38116e-11	3.8484e-11	1.62386e-05	0.00404614	0.000224787
B69R	B69	B	69	272	160	272	12832.9	12833	0.167841	0.258533	0.430087	0.465989	0.632357	0.634897
B69T	B69	B	69	271	160	271	12832.9	12783.2	6.61306e-13	1.3989e-11	3.8786e-11	1.63283e-05	0.00405725	0.000225533
B70K	B70	B	70	276	161	276	12832.9	12834.9	0.860738	0.802232	0.829076	0.716598	0.272924	0.478486
B70N	B70	B	70	274	161	274	12832.9	12783.2	6.61306e-13	1.3989e-11	3.8786e-11	1.63283e-05	0.00405725	0.000225533
B70Q	B70	B	70	273	161	273	12832.9	12787.2	5.05848e-12	1.39054e-10	1.07764e-09	7.84588e-05	0.019593	0.000992108
B70S	B70	B	70	275	161	275	12832.9	12826.3	0.00336827	0.0027913	0.00551797	0.112171	0.484557	0.267129
B71A	B71	B	71	277	162	277	12832.9	12783.2	6.61306e-13	1.3989e-11	3.8786e-11	1.63283e-05	0.00405725	0.000225533
B71T	B71	B	71	278	162	278	12832.9	12783.2	6.61306e-13	1.3989e-11	3.8786e-11	1.63283e-05	0.00405725	0.000225533
B74D	B74	B	74	279	163	279	12832.9	12807.2	1.39963e-07	7.30248e-05	3.68696e-05	5.53691e-06	0.00252734	0.000973415
B74Y	B74	B	74	280	163	280	12832.9	12807.2	1.39963e-07	7.30248e-05	3.68696e-05	5.53691e-06	0.00252734	0.000973415
B76E	B76	B	76	281	164	281	12832.9	12834.7	0.656811	0.95035	0.900544	0.953863	0.992466	0.986465
B76V	B76	B	76	282	164	282	12832.9	12834.7	0.656811	0.95035	0.900544	0.953863	0.992466	0.986465
B77D	B77	B	77	285	165	285	12832.9	12834	0.359415	0.379789	0.695056	0.855115	0.939522	0.811276
B77G	B77	B	77	286	165	286	12832.9	12834.8	0.722448	0.992199	0.938714	0.989683	0.983725	0.963008
B77N	B77	B	77	284	165	284	12832.9	12834.7	0.696449	0.2427	0.451636	0.851835	0.171436	0.152794
B77S	B77	B	77	283	165	283	12832.9	12834.9	0.934559	0.493116	0.600709	0.789282	0.180058	0.214265
B80I	B80	B	80	289	166	289	12832.9	12834.5	0.52644	0.365962	0.306876	0.923975	0.487452	0.451077
B80N	B80	B	80	287	166	287	12832.9	12834.9	0.941457	0.493264	0.599312	0.789538	0.180245	0.214735
B80T	B80	B	80	288	166	288	12832.9	12834.6	0.589562	0.912633	0.878034	0.819781	0.0425565	0.049673
B81A	B81	B	81	291	167	291	12832.9	12834.7	0.696449	0.2427	0.451636	0.851835	0.171436	0.152794
B81L	B81	B	81	290	167	290	12832.9	12834.7	0.696449	0.2427	0.451636	0.851835	0.171436	0.152794
B82L	B82	B	82	293	168	293	12832.9	12834.9	0.941457	0.493264	0.599312	0.789538	0.180245	0.214735
B82R	B82	B	82	292	168	292	12832.9	12834.9	0.941457	0.493264	0.599312	0.789538	0.180245	0.214735
B83G	B83	B	83	294	169	294	12832.9	12834.9	0.941457	0.493264	0.599312	0.789538	0.180245	0.214735
B83R	B83	B	83	295	169	295	12832.9	12834.9	0.941457	0.493264	0.599312	0.789538	0.180245	0.214735
B90A	B90	B	90	296	170	296	12832.9	12834.8	0.722448	0.992199	0.938714	0.989683	0.983725	0.963008
B90D	B90	B	90	297	170	297	12832.9	12834.8	0.722448	0.992199	0.938714	0.989683	0.983725	0.963008
B94I	B94	B	94	299	171	299	12832.9	12833	0.170925	0.3783	0.186749	0.0398101	0.112249	0.069837
B94T	B94	B	94	298	171	298	12832.9	12833.1	0.18183	0.39865	0.199056	0.0441547	0.0997711	0.0610939
B94W	B94	B	94	300	171	300	12832.9	12833.2	0.193528	0.150809	0.155784	0.102904	0.0639297	0.0586328
B95I	B95	B	95	303	172	303	12832.9	12832	0.0868975	0.23047	0.111958	0.020659	0.303291	0.205748
B95L	B95	B	95	301	172	301	12832.9	12816.4	1.70553e-05	0.00155898	0.00582688	0.000425685	0.289286	0.283164
B95W	B95	B	95	302	172	302	12832.9	12818.5	5.23476e-05	0.00236397	0.058006	0.0432753	0.0054901	0.00196322
B97N	B97	B	97	308	173	308	12832.9	12834.9	0.882982	0.803423	0.828339	0.718221	0.272784	0.479551
B97R	B97	B	97	307	173	307	12832.9	12811.5	1.30385e-06	9.94774e-05	8.9802e-05	0.000255343	0.0752313	0.0444686
B97S	B97	B	97	304	173	304	12832.9	12794.8	2.46305e-10	5.62355e-07	1.84787e-05	1.73266e-05	0.118026	0.0520184
B97T	B97	B	97	305	173	305	12832.9	12821.4	0.000245379	0.00541865	0.163802	0.103687	0.0454972	0.0310661
B97V	B97	B	97	309	173	309	12832.9	12826.6	0.0039812	0.0035661	0.0110514	0.263321	0.776427	0.368189
B97W	B97	B	97	306	173	306	12832.9	12834.4	0.500792	0.890837	0.714412	0.605666	0.0055668	0.00845761
B98M	B98	B	98	310	174	310	12832.9	12834.8	0.835477	0.621555	0.691702	0.740945	0.834193	0.924235
B98T	B98	B	98	311	174	311	12832.9	12834.8	0.835477	0.621555	0.691702	0.740945	0.834193	0.924235
B99F	B99	B	99	314	175	314	12832.9	12834.8	0.717874	0.534503	0.471958	0.355593	0.544107	0.576242
B99S	B99	B	99	313	175	313	12832.9	12833	0.174726	0.217334	0.283762	0.286129	0.0885885	0.101574
B99Y	B99	B	99	312	175	312	12832.9	12833.7	0.272276	0.380611	0.489256	0.548161	0.188897	0.202547
B103L	B103	B	103	316	176	316	12832.9	12824.7	0.00142783	0.00918865	0.0117803	0.0400392	0.536857	0.372029
B103M	B103	B	103	317	176	317	12832.9	12834.8	0.722448	0.992199	0.938714	0.989683	0.983725	0.963008
B103V	B103	B	103	315	176	315	12832.9	12824.7	0.00138061	0.00924494	0.0117488	0.0401312	0.537605	0.373243
B109F	B109	B	109	319	177	319	12832.9	12833.4	0.217557	0.235994	0.235954	0.53099	0.244043	0.801329
B109L	B109	B	109	318	177	318	12832.9	12833.4	0.217557	0.235994	0.235954	0.53099	0.244043	0.801329
B113H	B113	B	113	320	178	320	12832.9	12834.5	0.550359	0.794247	0.485141	0.593863	0.0120898	0.0233759
B113Y	B113	B	113	321	178	321	12832.9	12834.5	0.550359	0.794247	0.485141	0.593863	0.0120898	0.0233759
B114D	B114	B	114	322	179	322	12832.9	12831.4	0.0624596	0.0973392	0.319096	0.577016	0.128769	0.0324132
B114H	B114	B	114	324	179	324	12832.9	12834.9	0.997199	0.95547	0.69825	0.534489	0.231965	0.435059
B114N	B114	B	114	323	179	323	12832.9	12831.4	0.0603921	0.0991497	0.240376	0.773992	0.0345306	0.0108708
B116D	B116	B	116	329	180	329	12832.9	12834.9	0.95449	0.608327	0.773507	0.972614	0.00499167	0.00638753
B116F	B116	B	116	328	180	328	12832.9	12828.8	0.0139719	0.0137266	0.254482	0.478794	0.721836	0.861463
B116H	B116	B	116	330	180	330	12832.9	12830.9	0.0457934	0.0344645	0.038697	0.0343579	0.0105101	0.0183978
B116L	B116	B	116	327	180	327	12832.9	12834.9	0.937823	0.421492	0.502101	0.405658	0.929932	0.858372
B116N	B116	B	116	331	180	331	12832.9	12834.5	0.559166	0.495894	0.453724	0.560033	0.609806	0.65721
B116S	B116	B	116	326	180	326	12832.9	12827.9	0.00843163	0.0047942	0.00237182	0.0101506	0.210604	0.175934
B116Y	B116	B	116	325	180	325	12832.9	12823.7	0.000838439	0.0064093	0.0178867	0.050826	0.0990733	0.189226
B118C	B118	B	118	333	181	333	12832.9	12827.3	0.00598707	0.00856344	0.00999088	0.0242739	0.580401	0.679606
B118Y	B118	B	118	332	181	332	12832.9	12827.3	0.00598707	0.00856344	0.00999088	0.0242739	0.580401	0.679606
B131R	B131	B	131	334	182	334	12832.9	12821.4	0.000243943	0.00337552	0.0125012	0.00397345	0.592694	0.878452
B131S	B131	B	131	335	182	335	12832.9	12821.4	0.000243943	0.00337552	0.0125012	0.00397345	0.592694	0.878452
B143S	B143	B	143	337	183	337	12832.9	12814.7	7.17138e-06	0.000536201	0.00337337	0.0300873	0.000568094	0.000675054
B143T	B143	B	143	336	183	336	12832.9	12814.7	7.17138e-06	0.000536201	0.00337337	0.0300873	0.000568094	0.000675054
B145L	B145	B	145	339	184	339	12832.9	12834.8	0.781788	0.798994	0.954105	0.423929	0.904844	0.948016
B145R	B145	B	145	338	184	338	12832.9	12834.8	0.781788	0.798994	0.954105	0.423929	0.904844	0.948016
B147L	B147	B	147	341	185	341	12832.9	12814.7	7.17138e-06	0.000536201	0.00337337	0.0300873	0.000568094	0.000675054
B147W	B147	B	147	340	185	340	12832.9	12814.7	7.17138e-06	0.000536201	0.00337337	0.0300873	0.000568094	0.000675054
B152E	B152	B	152	342	186	342	12832.9	12805.9	7.34586e-08	8.95647e-07	6.2976e-06	0.0021453	0.0257735	0.00823807
B152V	B152	B	152	343	186	343	12832.9	12805.9	7.34586e-08	8.95647e-07	6.2976e-06	0.0021453	0.0257735	0.00823807
B156D	B156	B	156	345	187	345	12832.9	12834.8	0.7496	0.34836	0.172317	0.378865	0.665323	0.60936
B156L	B156	B	156	346	187	346	12832.9	12810.9	9.84073e-07	0.000915356	0.0103446	0.108777	0.567784	0.268231
B156R	B156	B	156	344	187	344	12832.9	12794.1	1.67272e-10	1.19184e-08	1.21118e-07	0.00119069	0.108448	0.0131236
B156W	B156	B	156	347	187	347	12832.9	12834.7	0.678896	0.620742	0.749057	0.617222	0.886245	0.953052
B158A	B158	B	158	348	188	348	12832.9	12832.1	0.0927086	0.218105	0.275155	0.316406	0.885366	0.955137
B158T	B158	B	158	349	188	349	12832.9	12832.1	0.0927086	0.218105	0.275155	0.316406	0.885366	0.955137
B163E	B163	B	163	350	189	350	12832.9	12827.1	0.00525644	0.00246121	0.00132842	0.0269998	0.784377	0.508149
B163L	B163	B	163	352	189	352	12832.9	12826.9	0.00481224	0.0361813	0.0162145	0.00234544	0.744654	0.726261
B163T	B163	B	163	351	189	351	12832.9	12834.8	0.725299	0.48819	0.591997	0.230409	0.939827	0.78154
B167S	B167	B	167	354	190	354	12832.9	12834.9	0.965501	0.657725	0.989252	0.600907	0.0426777	0.0286171
B167W	B167	B	167	353	190	353	12832.9	12834.9	0.965501	0.657725	0.989252	0.600907	0.0426777	0.0286171
B171H	B171	B	171	356	191	356	12832.9	12825.8	0.0025164	0.000517344	0.000443022	0.00063012	0.0598491	0.0194158
B171Y	B171	B	171	355	191	355	12832.9	12825.8	0.0025164	0.000517344	0.000443022	0.00063012	0.0598491	0.0194158
B177D	B177	B	177	357	192	357	12832.9	12824.1	0.00101759	0.0134616	0.0442321	0.0121651	0.366213	0.667593
B177E	B177	B	177	358	192	358	12832.9	12824.1	0.00101759	0.0134616	0.0442321	0.0121651	0.366213	0.667593
B178K	B178	B	178	359	193	359	12832.9	12827.2	0.00563869	0.00540455	0.00552556	0.153815	0.399425	0.961208
B178T	B178	B	178	360	193	360	12832.9	12827.2	0.00563869	0.00540455	0.00552556	0.153815	0.399425	0.961208
B180E	B180	B	180	361	194	361	12832.9	12800.5	4.41039e-09	6.90074e-06	0.000194798	0.000129239	0.279063	0.12272
B180Q	B180	B	180	362	194	362	12832.9	12800.5	4.41039e-09	6.90074e-06	0.000194798	0.000129239	0.279063	0.12272
B181E	B181	B	181	365	195	365	12832.9	12815	8.25297e-06	0.000582092	0.00371045	0.0339075	0.000688335	0.000826083
B181H	B181	B	181	364	195	364	12832.9	12834.1	0.378215	0.40062	0.524894	0.478055	0.680441	0.661162
B181R	B181	B	181	363	195	363	12832.9	12815	8.21015e-06	0.00057986	0.00370125	0.0338369	0.00068714	0.000824553
B1940	B194	B	194	366	196	366	12832.9	12834.5	0.530722	0.241292	0.242068	0.103469	0.580936	0.904528
B194I	B194	B	194	367	196	367	12832.9	12834.5	0.51514	0.237607	0.304484	0.14561	0.692479	0.953318
B194V	B194	B	194	368	196	368	12832.9	12834.9	0.984832	0.887644	0.552775	0.455796	0.592754	0.843166
B1990	B199	B	199	369	197	369	12832.9	12834.5	0.530722	0.241292	0.242068	0.103469	0.580936	0.904528
B199A	B199	B	199	370	197	370	12832.9	12834.6	0.606168	0.289476	0.287982	0.126573	0.65038	0.975512
B199V	B199	B	199	371	197	371	12832.9	12828.3	0.0104593	0.00671623	0.009944	0.0123812	0.0146501	0.0211699
B2450	B245	B	245	372	198	372	12832.9	12834.5	0.530722	0.241292	0.242068	0.103469	0.580936	0.904528
B245A	B245	B	245	373	198	373	12832.9	12834.4	0.502624	0.227461	0.225614	0.0914016	0.537447	0.85106
B245T	B245	B	245	374	198	374	12832.9	12834.5	0.540485	0.64268	0.575508	0.404906	0.351123	0.318906
B2750	B275	B	275	375	199	375	12832.9	12833.8	0.306774	0.200323	0.152383	0.157133	0.55204	0.925011
B275E	B275	B	275	376	199	376	12832.9	12833.8	0.294194	0.199251	0.1496	0.155652	0.55185	0.927541
B275K	B275	B	275	377	199	377	12832.9	12834.8	0.722448	0.992199	0.938714	0.989683	0.983725	0.963008
B2820	B282	B	282	378	200	378	12832.9	12833.9	0.317885	0.207981	0.158216	0.160982	0.55704	0.933326
B282I	B282	B	282	380	200	380	12832.9	12834.2	0.390851	0.361257	0.26615	0.232793	0.620243	0.971828
B282V	B282	B	282	379	200	379	12832.9	12834.6	0.608363	0.315096	0.348889	0.45784	0.751314	0.904011
B3050	B305	B	305	381	201	381	12832.9	12833.9	0.317885	0.207981	0.158216	0.160982	0.55704	0.933326
B305A	B305	B	305	382	201	382	12832.9	12834.8	0.764592	0.6098	0.546275	0.661052	0.889745	0.73185
B305T	B305	B	305	383	201	383	12832.9	12833.7	0.275711	0.212451	0.171701	0.13073	0.348359	0.655489
B3070	B307	B	307	384	202	384	12832.9	12833.9	0.317885	0.207981	0.158216	0.160982	0.55704	0.933326
B307M	B307	B	307	385	202	385	12832.9	12833.6	0.264638	0.143965	0.136281	0.148516	0.418616	0.791588
B307T	B307	B	307	386	202	386	12832.9	12834.9	0.977407	0.892183	0.962318	0.985398	0.672676	0.595971
B307V	B307	B	307	387	202	387	12832.9	12834.8	0.712263	0.531861	0.470792	0.355283	0.544093	0.576406
B3250	B325	B	325	388	203	388	12832.9	12833.8	0.289624	0.190729	0.141729	0.138472	0.500821	0.862244
B325C	B325	B	325	389	203	389	12832.9	12834.7	0.628274	0.335001	0.363481	0.416638	0.670285	0.82595
B325S	B325	B	325	390	203	390	12832.9	12834	0.348161	0.321685	0.232938	0.21102	0.588703	0.929239
DRB.250	DRB-25	DRB	-25	550	204	550	12832.9	12788.7	1.09161e-11	1.42295e-08	6.65535e-07	0.00148596	0.000131055	0.172387
DRB.25K	DRB-25	DRB	-25	551	204	551	12832.9	12833.2	0.193272	0.0660131	0.023038	0.107241	0.384017	0.0759103
DRB.25R	DRB-25	DRB	-25	552	204	552	12832.9	12757.5	1.42052e-18	4.75852e-15	2.96459e-13	9.15119e-07	2.39731e-07	0.970544
DRB.240	DRB-24	DRB	-24	553	205	553	12832.9	12788.7	1.09161e-11	1.42295e-08	6.65535e-07	0.00148596	0.000131055	0.172387
DRB.24F	DRB-24	DRB	-24	555	205	555	12832.9	12832.9	0.16008	0.877166	0.684869	0.00809929	0.160917	0.824485
DRB.24L	DRB-24	DRB	-24	554	205	554	12832.9	12789	1.24522e-11	1.46768e-08	6.62372e-07	0.00136886	0.000126258	0.173501
DRB.170	DRB-17	DRB	-17	556	206	556	12832.9	12788.7	1.09161e-11	1.42295e-08	6.65535e-07	0.00148596	0.000131055	0.172387
DRB.17A	DRB-17	DRB	-17	558	206	558	12832.9	12832.9	0.16008	0.877166	0.684869	0.00809929	0.160917	0.824485
DRB.17T	DRB-17	DRB	-17	557	206	557	12832.9	12789	1.24522e-11	1.46768e-08	6.62372e-07	0.00136886	0.000126258	0.173501
DRB.160	DRB-16	DRB	-16	559	207	559	12832.9	12788.7	1.09161e-11	1.42295e-08	6.65535e-07	0.00148596	0.000131055	0.172387
DRB.16A	DRB-16	DRB	-16	560	207	560	12832.9	12833.3	0.20891	0.0728306	0.0255778	0.112974	0.398704	0.0756986
DRB.16V	DRB-16	DRB	-16	561	207	561	12832.9	12757.8	1.62331e-18	5.43351e-15	3.31761e-13	9.68227e-07	2.54348e-07	0.970367
DRB.10	DRB-1	DRB	-1	562	208	562	12832.9	12788.7	1.09161e-11	1.42295e-08	6.65535e-07	0.00148596	0.000131055	0.172387
DRB.1A	DRB-1	DRB	-1	563	208	563	12832.9	12788.9	1.17183e-11	1.48564e-08	6.88226e-07	0.00150484	0.000132572	0.170476
DRB.1S	DRB-1	DRB	-1	564	208	564	12832.9	12834	0.34312	0.497235	0.549071	0.752394	0.814089	0.675729
DRB9E	DRB9	DRB	9	566	209	566	12832.9	12831.6	0.0685294	0.0245099	0.849394	0.942644	0.764737	0.0435046
DRB9K	DRB9	DRB	9	567	209	567	12832.9	12829.7	0.0221192	0.0218187	0.0491184	0.412267	0.42478	0.196828
DRB9W	DRB9	DRB	9	565	209	565	12832.9	12833	0.169233	0.0716189	0.558545	0.817341	0.884412	0.0786397
DRB10E	DRB10	DRB	10	570	210	570	12832.9	12834	0.347924	0.344098	0.517176	0.207123	0.264531	0.253248
DRB10Q	DRB10	DRB	10	568	210	568	12832.9	12832.3	0.109172	0.473568	7.7309e-06	1.57655e-05	0.000256729	0.294585
DRB10T	DRB10	DRB	10	571	210	571	12832.9	12829.9	0.0249791	0.0141725	0.00754371	8.54054e-05	7.01154e-05	0.000456829
DRB10Y	DRB10	DRB	10	569	210	569	12832.9	12832.6	0.128299	0.527123	7.80319e-06	2.23035e-05	0.000322645	0.34406
DRB11D	DRB11	DRB	11	576	211	576	12832.9	12829.7	0.0221192	0.0218187	0.0491184	0.412267	0.42478	0.196828
DRB11G	DRB11	DRB	11	575	211	575	12832.9	12832.1	0.0947787	0.630447	0.393113	0.533925	0.714759	0.366861
DRB11L	DRB11	DRB	11	572	211	572	12832.9	12817.2	2.54481e-05	3.38685e-05	1.53515e-07	0.0212646	0.601309	0.461835
DRB11P	DRB11	DRB	11	577	211	577	12832.9	12773.7	5.12037e-15	5.3394e-10	1.47487e-07	0.169731	0.723194	0.00919193
DRB11S	DRB11	DRB	11	573	211	573	12832.9	12832.7	0.142158	0.563576	1.10173e-05	3.44724e-05	0.000468883	0.391222
DRB11V	DRB11	DRB	11	574	211	574	12832.9	12818.8	6.20917e-05	0.000557314	1.08967e-06	2.38588e-06	1.12049e-05	0.000919597
DRB12K	DRB12	DRB	12	578	212	578	12832.9	12832.7	0.142158	0.563576	1.10173e-05	3.44724e-05	0.000468883	0.391222
DRB12T	DRB12	DRB	12	579	212	579	12832.9	12832.7	0.142158	0.563576	1.10173e-05	3.44724e-05	0.000468883	0.391222
DRB13F	DRB13	DRB	13	580	213	580	12832.9	12824.6	0.00136858	0.0017203	1.38747e-05	0.0915695	0.984108	0.943709
DRB13G	DRB13	DRB	13	584	213	584	12832.9	12722.3	2.68041e-26	9.47715e-24	0.0101388	0.224095	0.12338	0.199202
DRB13H	DRB13	DRB	13	582	213	582	12832.9	12817.1	2.52614e-05	0.00025745	4.79168e-07	5.85903e-07	3.48521e-06	0.000372595
DRB13R	DRB13	DRB	13	585	213	585	12832.9	12773.7	5.12037e-15	5.3394e-10	1.47487e-07	0.169731	0.723194	0.00919193
DRB13S	DRB13	DRB	13	581	213	581	12832.9	12792.5	7.44891e-11	8.41592e-08	0.000111581	8.59565e-05	0.00136643	0.267478
DRB13Y	DRB13	DRB	13	583	213	583	12832.9	12832.1	0.0947787	0.630447	0.393113	0.533925	0.714759	0.366861
DRB14E	DRB14	DRB	14	586	214	586	12832.9	12832.1	0.0947787	0.630447	0.393113	0.533925	0.714759	0.366861
DRB14K	DRB14	DRB	14	587	214	587	12832.9	12832.1	0.0947787	0.630447	0.393113	0.533925	0.714759	0.366861
DRB16H	DRB16	DRB	16	588	215	588	12832.9	12722.3	2.68041e-26	9.47715e-24	0.0101388	0.224095	0.12338	0.199202
DRB16Y	DRB16	DRB	16	589	215	589	12832.9	12722.3	2.68041e-26	9.47715e-24	0.0101388	0.224095	0.12338	0.199202
DRB25Q	DRB25	DRB	25	591	216	591	12832.9	12832.1	0.0947787	0.630447	0.393113	0.533925	0.714759	0.366861
DRB25R	DRB25	DRB	25	590	216	590	12832.9	12832.1	0.0947787	0.630447	0.393113	0.533925	0.714759	0.366861
DRB26F	DRB26	DRB	26	594	217	594	12832.9	12833.7	0.269439	0.013648	2.91696e-05	0.774498	0.409997	0.962402
DRB26L	DRB26	DRB	26	592	217	592	12832.9	12828.3	0.0101086	0.00552742	6.68312e-05	0.158575	0.719263	0.496764
DRB26Y	DRB26	DRB	26	593	217	593	12832.9	12833.6	0.254342	0.702894	0.1816	0.0783891	0.52781	0.471495
DRB28D	DRB28	DRB	28	596	218	596	12832.9	12827.1	0.00537664	0.208583	0.000869249	0.675853	0.443734	0.605964
DRB28E	DRB28	DRB	28	595	218	595	12832.9	12824	0.000991809	0.0789359	0.000158157	0.545591	0.547488	0.814588
DRB28H	DRB28	DRB	28	597	218	597	12832.9	12829.7	0.0221192	0.0218187	0.0491184	0.412267	0.42478	0.196828
DRB30C	DRB30	DRB	30	598	219	598	12832.9	12817.2	2.54481e-05	3.38685e-05	1.53515e-07	0.0212646	0.601309	0.461835
DRB30G	DRB30	DRB	30	601	219	601	12832.9	12829.7	0.0221192	0.0218187	0.0491184	0.412267	0.42478	0.196828
DRB30H	DRB30	DRB	30	603	219	603	12832.9	12818.8	6.13817e-05	0.00135036	0.00416428	0.103904	0.0507419	0.382994
DRB30L	DRB30	DRB	30	600	219	600	12832.9	12832.1	0.0947787	0.630447	0.393113	0.533925	0.714759	0.366861
DRB30R	DRB30	DRB	30	602	219	602	12832.9	12834	0.347924	0.344098	0.517176	0.207123	0.264531	0.253248
DRB30Y	DRB30	DRB	30	599	219	599	12832.9	12827.1	0.00520817	0.205397	0.000841684	0.671162	0.448297	0.604514
DRB31F	DRB31	DRB	31	605	220	605	12832.9	12824.6	0.00136858	0.0017203	1.38747e-05	0.0915695	0.984108	0.943709
DRB31I	DRB31	DRB	31	604	220	604	12832.9	12823	0.000559704	0.000712021	5.3472e-06	0.0467386	0.784408	0.74029
DRB31V	DRB31	DRB	31	606	220	606	12832.9	12834	0.347924	0.344098	0.517176	0.207123	0.264531	0.253248
DRB32H	DRB32	DRB	32	608	221	608	12832.9	12828.8	0.0138052	0.159428	0.973214	0.157743	0.518829	0.461324
DRB32Y	DRB32	DRB	32	607	221	607	12832.9	12828.8	0.0138052	0.159428	0.973214	0.157743	0.518829	0.461324
DRB37H	DRB37	DRB	37	610	222	610	12832.9	12817.1	2.52614e-05	0.00025745	4.79168e-07	5.85903e-07	3.48521e-06	0.000372595
DRB37N	DRB37	DRB	37	609	222	609	12832.9	12817.1	2.52614e-05	0.00025745	4.79168e-07	5.85903e-07	3.48521e-06	0.000372595
DRB38A	DRB38	DRB	38	618	223	618	12832.9	12834	0.347924	0.344098	0.517176	0.207123	0.264531	0.253248
DRB38L	DRB38	DRB	38	619	223	619	12832.9	12818.6	5.55039e-05	0.00122295	0.00383137	0.100088	0.0484184	0.378109
DRB38V	DRB38	DRB	38	617	223	617	12832.9	12819.8	0.00010027	0.00127791	0.00563021	0.0377445	0.0238729	0.946484
DRB40F	DRB40	DRB	40	620	224	620	12832.9	12834	0.347924	0.344098	0.517176	0.207123	0.264531	0.253248
DRB40Y	DRB40	DRB	40	621	224	621	12832.9	12834	0.347924	0.344098	0.517176	0.207123	0.264531	0.253248
DRB47F	DRB47	DRB	47	623	225	623	12832.9	12672.9	4.13465e-37	1.82983e-25	1.36675e-17	1.56034e-10	2.29922e-07	5.71316e-05
DRB47Y	DRB47	DRB	47	622	225	622	12832.9	12672.9	4.13465e-37	1.82983e-25	1.36675e-17	1.56034e-10	2.29922e-07	5.71316e-05
DRB51R	DRB51	DRB	51	625	226	625	12832.9	12822.4	0.000401087	0.000650637	0.000830943	0.0518157	0.0672163	0.217919
DRB51T	DRB51	DRB	51	624	226	624	12832.9	12822.4	0.000401087	0.000650637	0.000830943	0.0518157	0.0672163	0.217919
DRB57A	DRB57	DRB	57	629	227	629	12832.9	12828.8	0.0134268	0.0166804	0.00547126	1.06784e-06	9.44451e-07	3.31548e-05
DRB57D	DRB57	DRB	57	626	227	626	12832.9	12797.5	9.75503e-10	4.43884e-05	0.656247	0.495562	0.406407	0.295541
DRB57S	DRB57	DRB	57	627	227	627	12832.9	12709.6	4.3148e-29	1.04863e-24	0.514338	0.935283	0.922638	0.178251
DRB57V	DRB57	DRB	57	628	227	628	12832.9	12834.9	0.885465	0.0521319	0.614908	0.218059	0.281161	0.330228
DRB58A	DRB58	DRB	58	630	228	630	12832.9	12730.5	1.69923e-24	9.00286e-22	1.03176e-19	2.34035e-11	2.43873e-11	0.0650169
DRB58D	DRB58	DRB	58	615	228	615	12832.9	12819.2	7.57512e-05	0.000125858	0.000467498	0.0270258	0.0238144	0.982019
DRB58E	DRB58	DRB	58	631	228	631	12832.9	12730.5	1.69923e-24	9.00286e-22	1.03176e-19	2.34035e-11	2.43873e-11	0.0650169
DRB58F	DRB58	DRB	58	614	228	614	12832.9	12828.2	0.00952696	0.58464	0.0489861	0.166124	0.101316	0.394512
DRB58L	DRB58	DRB	58	616	228	616	12832.9	12818.9	6.52846e-05	0.00140006	0.00428646	0.104955	0.0511666	0.378971
DRB58N	DRB58	DRB	58	612	228	612	12832.9	12826.7	0.00423357	0.0511403	0.509464	0.00416054	0.0436529	0.00882748
DRB58S	DRB58	DRB	58	611	228	611	12832.9	12826.8	0.00434112	0.109685	0.978757	0.42363	0.864049	0.244772
DRB58Y	DRB58	DRB	58	613	228	613	12832.9	12817	2.29865e-05	0.000247787	0.724143	0.257159	0.429788	0.00397041
DRB60H	DRB60	DRB	60	634	229	634	12832.9	12828.8	0.0134268	0.0166804	0.00547126	1.06784e-06	9.44451e-07	3.31548e-05
DRB60S	DRB60	DRB	60	633	229	633	12832.9	12834.8	0.733557	0.147949	0.627283	0.223157	0.269141	0.321147
DRB60Y	DRB60	DRB	60	632	229	632	12832.9	12833.1	0.18746	0.683477	0.508432	0.470428	0.400116	0.50383
DRB670	DRB67	DRB	67	638	230	638	12832.9	12833.4	0.229014	0.353901	0.526754	0.70294	0.708558	0.0353651
DRB67F	DRB67	DRB	67	637	230	637	12832.9	12834.7	0.704336	0.837626	2.83231e-17	1.16385e-09	2.3178e-09	0.0452432
DRB67I	DRB67	DRB	67	636	230	636	12832.9	12794.7	2.33013e-10	1.70048e-11	9.47103e-07	0.0116442	0.0403231	0.00145869
DRB67L	DRB67	DRB	67	635	230	635	12832.9	12798.8	1.85293e-09	7.60917e-11	1.96701e-20	4.15215e-09	1.04164e-07	3.76685e-05
DRB700	DRB70	DRB	70	642	231	642	12832.9	12833.4	0.229014	0.353901	0.526754	0.70294	0.708558	0.0353651
DRB70D	DRB70	DRB	70	640	231	640	12832.9	12834.9	0.998608	0.0785222	9.87131e-08	3.40212e-06	1.88314e-06	0.0268573
DRB70Q	DRB70	DRB	70	639	231	639	12832.9	12834.8	0.821652	0.128087	2.34035e-06	0.00101922	0.000764078	0.267487
DRB70R	DRB70	DRB	70	641	231	641	12832.9	12834.6	0.587086	0.633866	0.29176	0.00250607	0.00183873	0.0233879
DRB710	DRB71	DRB	71	646	232	646	12832.9	12833.4	0.229014	0.353901	0.526754	0.70294	0.708558	0.0353651
DRB71A	DRB71	DRB	71	647	232	647	12832.9	12770.2	8.60642e-16	1.52527e-10	4.41198e-08	0.162115	0.705231	0.00640307
DRB71E	DRB71	DRB	71	644	232	644	12832.9	12830.3	0.0329909	0.0125004	0.120923	0.251768	0.135139	0.100209
DRB71K	DRB71	DRB	71	645	232	645	12832.9	12833.9	0.325172	0.245247	0.00788315	0.46896	0.296882	0.484833
DRB71R	DRB71	DRB	71	643	232	643	12832.9	12771.9	2.06405e-15	3.21363e-07	0.0101574	0.327399	0.800098	0.0290379
DRB730	DRB73	DRB	73	650	233	650	12832.9	12833.4	0.229014	0.353901	0.526754	0.70294	0.708558	0.0353651
DRB73A	DRB73	DRB	73	648	233	648	12832.9	12834	0.360037	0.685703	0.0319642	0.0760924	0.51858	0.288234
DRB73G	DRB73	DRB	73	649	233	649	12832.9	12834	0.359111	0.684657	0.031898	0.0759882	0.518161	0.286582
DRB740	DRB74	DRB	74	656	234	656	12832.9	12833.4	0.229014	0.353901	0.526754	0.70294	0.708558	0.0353651
DRB74A	DRB74	DRB	74	651	234	651	12832.9	12772.3	2.56458e-15	8.69061e-11	0.00101263	0.537713	0.0852787	0.441554
DRB74E	DRB74	DRB	74	653	234	653	12832.9	12827.1	0.00524782	0.103553	0.0127462	2.24271e-07	2.62257e-07	7.68747e-05
DRB74L	DRB74	DRB	74	655	234	655	12832.9	12629.1	1.13789e-46	1.73125e-39	1	1	1	1
DRB74Q	DRB74	DRB	74	654	234	654	12832.9	12832.1	0.0947787	0.630447	0.393113	0.533925	0.714759	0.366861
DRB74R	DRB74	DRB	74	652	234	652	12832.9	12834.6	0.596054	0.29701	0.0534386	0.110551	0.670611	0.710775
DRB770	DRB77	DRB	77	659	235	659	12832.9	12833.4	0.229014	0.353901	0.526754	0.70294	0.708558	0.0353651
DRB77N	DRB77	DRB	77	658	235	658	12832.9	12834.6	0.596054	0.29701	0.0534386	0.110551	0.670611	0.710775
DRB77T	DRB77	DRB	77	657	235	657	12832.9	12834.6	0.59435	0.297869	0.0535862	0.110745	0.671231	0.714265
DRB780	DRB78	DRB	78	662	236	662	12832.9	12833.4	0.229014	0.353901	0.526754	0.70294	0.708558	0.0353651
DRB78V	DRB78	DRB	78	661	236	661	12832.9	12833.8	0.305136	0.283106	0.755329	0.415423	0.57582	0.225565
DRB78Y	DRB78	DRB	78	660	236	660	12832.9	12833.8	0.306172	0.282266	0.756263	0.415838	0.576311	0.227146
DRB850	DRB85	DRB	85	665	237	665	12832.9	12833.4	0.229014	0.353901	0.526754	0.70294	0.708558	0.0353651
DRB85A	DRB85	DRB	85	664	237	664	12832.9	12821.8	0.000296281	0.00254537	0.0099024	0.0338541	0.00472693	0.38557
DRB85V	DRB85	DRB	85	663	237	663	12832.9	12821.8	0.000289861	0.0025075	0.00981402	0.034039	0.00475946	0.391946
DRB860	DRB86	DRB	86	668	238	668	12832.9	12833.4	0.229014	0.353901	0.526754	0.70294	0.708558	0.0353651
DRB86G	DRB86	DRB	86	666	238	666	12832.9	12802.7	1.41742e-08	7.94793e-05	0.0477489	0.807529	0.215484	0.483623
DRB86V	DRB86	DRB	86	667	238	667	12832.9	12802.7	1.43384e-08	7.99975e-05	0.0478696	0.807075	0.21574	0.485723
DRB960	DRB96	DRB	96	669	239	669	12832.9	12789	1.2537e-11	1.57618e-08	7.3185e-07	0.00160311	0.000143368	0.163378
DRB96E	DRB96	DRB	96	670	239	670	12832.9	12832.5	0.121434	0.0366908	0.0112812	0.0477113	0.205055	0.0296874
DRB96H	DRB96	DRB	96	672	239	672	12832.9	12754.3	2.7521e-19	9.37387e-16	5.80723e-14	1.80976e-07	4.36106e-08	0.641759
DRB96Q	DRB96	DRB	96	673	239	673	12832.9	12834	0.34312	0.497235	0.549071	0.752394	0.814089	0.675729
DRB96Y	DRB96	DRB	96	671	239	671	12832.9	12834.8	0.716762	0.315511	0.157316	0.00257209	0.0239274	0.155494
DRB980	DRB98	DRB	98	674	240	674	12832.9	12789	1.2537e-11	1.57618e-08	7.3185e-07	0.00160311	0.000143368	0.163378
DRB98E	DRB98	DRB	98	676	240	676	12832.9	12834.8	0.716762	0.315511	0.157316	0.00257209	0.0239274	0.155494
DRB98K	DRB98	DRB	98	675	240	675	12832.9	12789	1.24522e-11	1.46768e-08	6.62372e-07	0.00136886	0.000126258	0.173501
DRB1040	DRB104	DRB	104	677	241	677	12832.9	12789	1.2537e-11	1.57618e-08	7.3185e-07	0.00160311	0.000143368	0.163378
DRB104A	DRB104	DRB	104	679	241	679	12832.9	12834.8	0.716762	0.315511	0.157316	0.00257209	0.0239274	0.155494
DRB104S	DRB104	DRB	104	678	241	678	12832.9	12789	1.24522e-11	1.46768e-08	6.62372e-07	0.00136886	0.000126258	0.173501
DRB1200	DRB120	DRB	120	680	242	680	12832.9	12789	1.2537e-11	1.57618e-08	7.3185e-07	0.00160311	0.000143368	0.163378
DRB120N	DRB120	DRB	120	682	242	682	12832.9	12834.8	0.716762	0.315511	0.157316	0.00257209	0.0239274	0.155494
DRB120S	DRB120	DRB	120	681	242	681	12832.9	12789	1.24522e-11	1.46768e-08	6.62372e-07	0.00136886	0.000126258	0.173501
DRB1330	DRB133	DRB	133	683	243	683	12832.9	12789	1.2537e-11	1.57618e-08	7.3185e-07	0.00160311	0.000143368	0.163378
DRB133L	DRB133	DRB	133	685	243	685	12832.9	12834	0.34312	0.497235	0.549071	0.752394	0.814089	0.675729
DRB133R	DRB133	DRB	133	684	243	684	12832.9	12789.1	1.34552e-11	1.64538e-08	7.56704e-07	0.00162335	0.000145018	0.161543
DRB1400	DRB140	DRB	140	686	244	686	12832.9	12789	1.2537e-11	1.57618e-08	7.3185e-07	0.00160311	0.000143368	0.163378
DRB140A	DRB140	DRB	140	688	244	688	12832.9	12834	0.34312	0.497235	0.549071	0.752394	0.814089	0.675729
DRB140T	DRB140	DRB	140	687	244	687	12832.9	12789.1	1.34552e-11	1.64538e-08	7.56704e-07	0.00162335	0.000145018	0.161543
DRB1420	DRB142	DRB	142	689	245	689	12832.9	12789	1.2537e-11	1.57618e-08	7.3185e-07	0.00160311	0.000143368	0.163378
DRB142M	DRB142	DRB	142	691	245	691	12832.9	12834	0.34312	0.497235	0.549071	0.752394	0.814089	0.675729
DRB142V	DRB142	DRB	142	690	245	690	12832.9	12789.1	1.34552e-11	1.64538e-08	7.56704e-07	0.00162335	0.000145018	0.161543
DRB1490	DRB149	DRB	149	692	246	692	12832.9	12789	1.2537e-11	1.57618e-08	7.3185e-07	0.00160311	0.000143368	0.163378
DRB149H	DRB149	DRB	149	693	246	693	12832.9	12789.1	1.33629e-11	1.53216e-08	6.8492e-07	0.00138634	0.000127718	0.17158
DRB149Q	DRB149	DRB	149	694	246	694	12832.9	12834.8	0.839875	0.629473	0.386904	0.0200314	0.0779417	0.332772
DRB1800	DRB180	DRB	180	695	247	695	12832.9	12789	1.2537e-11	1.57618e-08	7.3185e-07	0.00160311	0.000143368	0.163378
DRB180L	DRB180	DRB	180	697	247	697	12832.9	12834.8	0.716762	0.315511	0.157316	0.00257209	0.0239274	0.155494
DRB180V	DRB180	DRB	180	696	247	696	12832.9	12789	1.24522e-11	1.46768e-08	6.62372e-07	0.00136886	0.000126258	0.173501
DRB1810	DRB181	DRB	181	698	248	698	12832.9	12789	1.2537e-11	1.57618e-08	7.3185e-07	0.00160311	0.000143368	0.163378
DRB181T	DRB181	DRB	181	699	248	699	12832.9	12789	1.2537e-11	1.57618e-08	7.3185e-07	0.00160311	0.000143368	0.163378
DRB2330	DRB233	DRB	233	700	249	700	12832.9	12789	1.2537e-11	1.57618e-08	7.3185e-07	0.00160311	0.000143368	0.163378
DRB233R	DRB233	DRB	233	702	249	702	12832.9	12754.3	2.7521e-19	9.37387e-16	5.80723e-14	1.80976e-07	4.36106e-08	0.641759
DRB233T	DRB233	DRB	233	701	249	701	12832.9	12832.5	0.12296	0.0352102	0.0103589	0.0396166	0.184879	0.0273183
DQA.160	DQA-16	DQA	-16	704	250	704	12832.9	12831.9	0.0836334	0.0290787	0.0642582	0.0117788	0.0181727	0.0236503
DQA.16L	DQA-16	DQA	-16	703	250	703	12832.9	12830.4	0.0347885	0.0134657	0.502214	0.381465	0.762002	0.0527205
DQA.16M	DQA-16	DQA	-16	705	250	705	12832.9	12830.5	0.0354396	0.0138393	0.497293	0.387799	0.770104	0.0515654
DQA.130	DQA-13	DQA	-13	707	251	707	12832.9	12831.9	0.0836334	0.0290787	0.0642582	0.0117788	0.0181727	0.0236503
DQA.13A	DQA-13	DQA	-13	706	251	706	12832.9	12710.2	6.01878e-29	2.40954e-24	1.49324e-21	1.64716e-11	2.47864e-12	1
DQA.13T	DQA-13	DQA	-13	708	251	708	12832.9	12710.6	7.14225e-29	2.93417e-24	1.7488e-21	1.91785e-11	2.87015e-12	0.0236503
DQA.70	DQA-7	DQA	-7	711	252	711	12832.9	12831.9	0.0836334	0.0290787	0.0642582	0.0117788	0.0181727	0.0236503
DQA.7M	DQA-7	DQA	-7	710	252	710	12832.9	12830.9	0.0450951	0.0491607	0.0145781	5.95864e-05	4.27205e-05	0.000696677
DQA.7V	DQA-7	DQA	-7	709	252	709	12832.9	12831	0.0473569	0.0523795	0.015525	6.84506e-05	4.87215e-05	0.00077466
DQA.60	DQA-6	DQA	-6	713	253	713	12832.9	12831.9	0.0836334	0.0290787	0.0642582	0.0117788	0.0181727	0.0236503
DQA.6M	DQA-6	DQA	-6	712	253	712	12832.9	12830.3	0.0322261	0.0289934	0.0654065	0.489508	0.489879	0.232482
DQA.6T	DQA-6	DQA	-6	714	253	714	12832.9	12830.5	0.0353235	0.0327408	0.0715972	0.526461	0.52436	0.252989
DQA10	DQA1	DQA	1	716	254	716	12832.9	12831.9	0.0836334	0.0290787	0.0642582	0.0117788	0.0181727	0.0236503
DQA1E	DQA1	DQA	1	715	254	715	12832.9	12829.9	0.0261765	0.0272061	0.059215	0.30805	0.352356	0.377265
DQA1K	DQA1	DQA	1	717	254	717	12832.9	12831.5	0.0651755	0.0852607	0.136041	0.631566	0.672393	0.175902
DQA20	DQA2	DQA	2	720	255	720	12832.9	12831.9	0.0836334	0.0290787	0.0642582	0.0117788	0.0181727	0.0236503
DQA2D	DQA2	DQA	2	718	255	718	12832.9	12831	0.0473569	0.0523795	0.015525	6.84506e-05	4.87215e-05	0.00077466
DQA2G	DQA2	DQA	2	719	255	719	12832.9	12830.9	0.0450951	0.0491607	0.0145781	5.95864e-05	4.27205e-05	0.000696677
DQA110	DQA11	DQA	11	722	256	722	12832.9	12831.9	0.0836334	0.0290787	0.0642582	0.0117788	0.0181727	0.0236503
DQA11C	DQA11	DQA	11	721	256	721	12832.9	12822.8	0.000510046	0.00723523	0.490858	0.391011	0.776294	0.0508337
DQA11Y	DQA11	DQA	11	723	256	723	12832.9	12822.8	0.000498736	0.00705521	0.485999	0.397438	0.784435	0.0497142
DQA18F	DQA18	DQA	18	724	257	724	12832.9	12822.8	0.000498736	0.00705521	0.485999	0.397438	0.784435	0.0497142
DQA18S	DQA18	DQA	18	725	257	725	12832.9	12822.8	0.000498736	0.00705521	0.485999	0.397438	0.784435	0.0497142
DQA25F	DQA25	DQA	25	727	258	727	12832.9	12833.8	0.299704	0.348675	0.966478	0.897239	0.76994	0.411902
DQA25Y	DQA25	DQA	25	726	258	726	12832.9	12833.8	0.299704	0.348675	0.966478	0.897239	0.76994	0.411902
DQA26S	DQA26	DQA	26	729	259	729	12832.9	12821.6	0.000269499	0.00198976	5.92885e-06	1.76837e-06	9.21668e-06	0.00115443
DQA26T	DQA26	DQA	26	728	259	728	12832.9	12821.6	0.000269499	0.00198976	5.92885e-06	1.76837e-06	9.21668e-06	0.00115443
DQA34E	DQA34	DQA	34	730	260	730	12832.9	12776.2	1.84328e-14	1.5241e-08	7.63784e-19	4.54871e-11	6.5951e-08	0.000188246
DQA34Q	DQA34	DQA	34	731	260	731	12832.9	12776.2	1.84328e-14	1.5241e-08	7.63784e-19	4.54871e-11	6.5951e-08	0.000188246
DQA40E	DQA40	DQA	40	732	261	732	12832.9	12834	0.356744	0.632555	8.04071e-06	1.87074e-07	7.83049e-06	0.736855
DQA40G	DQA40	DQA	40	733	261	733	12832.9	12834	0.356744	0.632555	8.04071e-06	1.87074e-07	7.83049e-06	0.736855
DQA41K	DQA41	DQA	41	735	262	735	12832.9	12831.5	0.0648956	0.0503022	0.174593	0.184269	0.203489	0.998814
DQA41R	DQA41	DQA	41	734	262	734	12832.9	12831.5	0.0648956	0.0503022	0.174593	0.184269	0.203489	0.998814
DQA44A	DQA44	DQA	44	737	263	737	12832.9	12831.9	0.0836334	0.0290787	0.0642582	0.0117788	0.0181727	0.0236503
DQA44T	DQA44	DQA	44	736	263	736	12832.9	12831.9	0.0836334	0.0290787	0.0642582	0.0117788	0.0181727	0.0236503
DQA45A	DQA45	DQA	45	738	264	738	12832.9	12822.8	0.000498736	0.00705521	0.485999	0.397438	0.784435	0.0497142
DQA45V	DQA45	DQA	45	739	264	739	12832.9	12822.8	0.000498736	0.00705521	0.485999	0.397438	0.784435	0.0497142
DQA47C	DQA47	DQA	47	743	265	743	12832.9	12834	0.356744	0.632555	8.04071e-06	1.87074e-07	7.83049e-06	0.736855
DQA47K	DQA47	DQA	47	741	265	741	12832.9	12832	0.0900812	0.649079	0.379768	0.554057	0.737559	0.383011
DQA47Q	DQA47	DQA	47	742	265	742	12832.9	12821.6	0.000269499	0.00198976	5.92885e-06	1.76837e-06	9.21668e-06	0.00115443
DQA47R	DQA47	DQA	47	740	265	740	12832.9	12822.8	0.000498736	0.00705521	0.485999	0.397438	0.784435	0.0497142
DQA48L	DQA48	DQA	48	745	266	745	12832.9	12822.8	0.000498736	0.00705521	0.485999	0.397438	0.784435	0.0497142
DQA48W	DQA48	DQA	48	744	266	744	12832.9	12822.8	0.000498736	0.00705521	0.485999	0.397438	0.784435	0.0497142
DQA50E	DQA50	DQA	50	746	267	746	12832.9	12822.8	0.000498736	0.00705521	0.485999	0.397438	0.784435	0.0497142
DQA50L	DQA50	DQA	50	747	267	747	12832.9	12816.3	1.58367e-05	0.0230538	6.05953e-06	0.000277226	0.000409373	0.0337217
DQA50V	DQA50	DQA	50	748	267	748	12832.9	12834	0.356744	0.632555	8.04071e-06	1.87074e-07	7.83049e-06	0.736855
DQA51F	DQA51	DQA	51	749	268	749	12832.9	12834	0.356744	0.632555	8.04071e-06	1.87074e-07	7.83049e-06	0.736855
DQA51L	DQA51	DQA	51	750	268	750	12832.9	12834	0.356744	0.632555	8.04071e-06	1.87074e-07	7.83049e-06	0.736855
DQA52H	DQA52	DQA	52	752	269	752	12832.9	12832	0.0900812	0.649079	0.379768	0.554057	0.737559	0.383011
DQA52R	DQA52	DQA	52	753	269	753	12832.9	12830.2	0.029827	0.0030423	0.97028	0.698063	0.98487	0.00822815
DQA52S	DQA52	DQA	52	751	269	751	12832.9	12822.8	0.000498736	0.00705521	0.485999	0.397438	0.784435	0.0497142
DQA53G	DQA53	DQA	53	756	270	756	12832.9	12834.3	0.427312	0.587221	2.92533e-21	2.81157e-11	4.48852e-12	0.0284954
DQA53K	DQA53	DQA	53	754	270	754	12832.9	12822.8	0.000498736	0.00705521	0.485999	0.397438	0.784435	0.0497142
DQA53Q	DQA53	DQA	53	757	270	757	12832.9	12834.7	0.662344	0.265463	0.0540505	0.106105	0.645405	0.694373
DQA53R	DQA53	DQA	53	755	270	755	12832.9	12816.3	1.58367e-05	0.0230538	6.05953e-06	0.000277226	0.000409373	0.0337217
DQA54F	DQA54	DQA	54	758	271	758	12832.9	12832	0.0900812	0.649079	0.379768	0.554057	0.737559	0.383011
DQA54L	DQA54	DQA	54	759	271	759	12832.9	12832	0.0900812	0.649079	0.379768	0.554057	0.737559	0.383011
DQA55G	DQA55	DQA	55	760	272	760	12832.9	12822.8	0.000498736	0.00705521	0.485999	0.397438	0.784435	0.0497142
DQA55R	DQA55	DQA	55	761	272	761	12832.9	12822.8	0.000498736	0.00705521	0.485999	0.397438	0.784435	0.0497142
DQA560	DQA56	DQA	56	763	273	763	12832.9	12834.7	0.676343	0.927941	0.00168422	7.54352e-07	3.82776e-05	0.311513
DQA56G	DQA56	DQA	56	762	273	762	12832.9	12822.8	0.000498736	0.00705521	0.485999	0.397438	0.784435	0.0497142
DQA56R	DQA56	DQA	56	764	273	764	12832.9	12821.6	0.000269499	0.00198976	5.92885e-06	1.76837e-06	9.21668e-06	0.00115443
DQA61F	DQA61	DQA	61	766	274	766	12832.9	12822.8	0.000498736	0.00705521	0.485999	0.397438	0.784435	0.0497142
DQA61G	DQA61	DQA	61	765	274	765	12832.9	12822.8	0.000498736	0.00705521	0.485999	0.397438	0.784435	0.0497142
DQA64R	DQA64	DQA	64	767	275	767	12832.9	12822.8	0.000498736	0.00705521	0.485999	0.397438	0.784435	0.0497142
DQA64T	DQA64	DQA	64	768	275	768	12832.9	12822.8	0.000498736	0.00705521	0.485999	0.397438	0.784435	0.0497142
DQA66I	DQA66	DQA	66	770	276	770	12832.9	12822.8	0.000498736	0.00705521	0.485999	0.397438	0.784435	0.0497142
DQA66M	DQA66	DQA	66	769	276	769	12832.9	12822.8	0.000498736	0.00705521	0.485999	0.397438	0.784435	0.0497142
DQA69A	DQA69	DQA	69	771	277	771	12832.9	12822.8	0.000498736	0.00705521	0.485999	0.397438	0.784435	0.0497142
DQA69L	DQA69	DQA	69	772	277	772	12832.9	12832.1	0.0929152	0.0422385	0.504585	0.383818	0.736683	0.0583989
DQA69T	DQA69	DQA	69	773	277	773	12832.9	12642.5	9.7774e-44	2.25285e-36	0.847618	0.79983	0.602637	0.687058
DQA75I	DQA75	DQA	75	774	278	774	12832.9	12777.8	4.12775e-14	1.62917e-08	7.31881e-06	1.68571e-07	7.10173e-06	0.720187
DQA75S	DQA75	DQA	75	775	278	775	12832.9	12777.8	4.12775e-14	1.62917e-08	7.31881e-06	1.68571e-07	7.10173e-06	0.720187
DQA76L	DQA76	DQA	76	777	279	777	12832.9	12834.7	0.676343	0.927941	0.00168422	7.54352e-07	3.82776e-05	0.311513
DQA76M	DQA76	DQA	76	776	279	776	12832.9	12822.8	0.000498736	0.00705521	0.485999	0.397438	0.784435	0.0497142
DQA76V	DQA76	DQA	76	778	279	778	12832.9	12821.6	0.000269499	0.00198976	5.92885e-06	1.76837e-06	9.21668e-06	0.00115443
DQA80S	DQA80	DQA	80	780	280	780	12832.9	12822.8	0.000498736	0.00705521	0.485999	0.397438	0.784435	0.0497142
DQA80Y	DQA80	DQA	80	779	280	779	12832.9	12822.8	0.000498736	0.00705521	0.485999	0.397438	0.784435	0.0497142
DQA1070	DQA107	DQA	107	782	281	782	12832.9	12831.9	0.0836334	0.0290787	0.0642582	0.0117788	0.0181727	0.0236503
DQA107I	DQA107	DQA	107	783	281	783	12832.9	12777.8	4.12775e-14	1.62917e-08	7.31881e-06	1.68571e-07	7.10173e-06	0.720187
DQA107T	DQA107	DQA	107	781	281	781	12832.9	12777.6	3.83119e-14	1.51922e-08	6.97715e-06	1.56043e-07	6.67004e-06	0.709163
DQA1290	DQA129	DQA	129	786	282	786	12832.9	12831.9	0.0836334	0.0290787	0.0642582	0.0117788	0.0181727	0.0236503
DQA129H	DQA129	DQA	129	785	282	785	12832.9	12827.4	0.00621336	0.061349	0.935215	0.781839	0.777475	0.0509733
DQA129Q	DQA129	DQA	129	784	282	784	12832.9	12827.4	0.0063335	0.0625879	0.94171	0.772994	0.785587	0.0521125
DQA1300	DQA130	DQA	130	789	283	789	12832.9	12831.9	0.0836334	0.0290787	0.0642582	0.0117788	0.0181727	0.0236503
DQA130A	DQA130	DQA	130	788	283	788	12832.9	12831.5	0.0648956	0.0503022	0.174593	0.184269	0.203489	0.998814
DQA130S	DQA130	DQA	130	787	283	787	12832.9	12831.4	0.0625822	0.0478715	0.169001	0.19297	0.212192	0.982777
DQA1380	DQA138	DQA	138	791	284	791	12832.9	12831.9	0.0836334	0.0290787	0.0642582	0.0117788	0.0181727	0.0236503
DQA138I	DQA138	DQA	138	792	284	792	12832.9	12806.7	1.07337e-07	1.0358e-05	0.337233	0.379454	0.28975	0.270548
DQA138T	DQA138	DQA	138	790	284	790	12832.9	12814.9	7.72733e-06	0.000567611	0.129744	0.0943826	0.0745354	0.0741578
DQA1560	DQA156	DQA	156	794	285	794	12832.9	12831.9	0.0836334	0.0290787	0.0642582	0.0117788	0.0181727	0.0236503
DQA156F	DQA156	DQA	156	793	285	793	12832.9	12777.6	3.83119e-14	1.51922e-08	6.97715e-06	1.56043e-07	6.67004e-06	0.709163
DQA156L	DQA156	DQA	156	795	285	795	12832.9	12777.8	4.12775e-14	1.62917e-08	7.31881e-06	1.68571e-07	7.10173e-06	0.720187
DQA1600	DQA160	DQA	160	797	286	797	12832.9	12831.9	0.0836334	0.0290787	0.0642582	0.0117788	0.0181727	0.0236503
DQA160A	DQA160	DQA	160	796	286	796	12832.9	12834	0.341441	0.399141	0.867529	0.000211658	0.010177	0.460387
DQA160D	DQA160	DQA	160	798	286	798	12832.9	12834	0.340107	0.399917	0.871911	0.00022678	0.0107063	0.478938
DQA160S	DQA160	DQA	160	799	286	799	12832.9	12834.7	0.684092	0.686457	0.600846	0.339977	0.349791	0.198961
DQA1610	DQA161	DQA	161	801	287	801	12832.9	12831.9	0.0836334	0.0290787	0.0642582	0.0117788	0.0181727	0.0236503
DQA161D	DQA161	DQA	161	800	287	800	12832.9	12777.6	3.83119e-14	1.51922e-08	6.97715e-06	1.56043e-07	6.67004e-06	0.709163
DQA161E	DQA161	DQA	161	802	287	802	12832.9	12777.8	4.12775e-14	1.62917e-08	7.31881e-06	1.68571e-07	7.10173e-06	0.720187
DQA1630	DQA163	DQA	163	804	288	804	12832.9	12831.9	0.0836334	0.0290787	0.0642582	0.0117788	0.0181727	0.0236503
DQA163I	DQA163	DQA	163	803	288	803	12832.9	12777.6	3.83119e-14	1.51922e-08	6.97715e-06	1.56043e-07	6.67004e-06	0.709163
DQA163S	DQA163	DQA	163	805	288	805	12832.9	12777.8	4.12775e-14	1.62917e-08	7.31881e-06	1.68571e-07	7.10173e-06	0.720187
DQA1750	DQA175	DQA	175	807	289	807	12832.9	12831.9	0.0836334	0.0290787	0.0642582	0.0117788	0.0181727	0.0236503
DQA175E	DQA175	DQA	175	808	289	808	12832.9	12739.5	1.56754e-22	1.41614e-13	5.59031e-06	0.000259842	0.000382606	0.0324815
DQA175K	DQA175	DQA	175	809	289	809	12832.9	12777.8	4.12775e-14	1.62917e-08	7.31881e-06	1.68571e-07	7.10173e-06	0.720187
DQA175Q	DQA175	DQA	175	806	289	806	12832.9	12822.8	0.000510046	0.00723523	0.490858	0.391011	0.776294	0.0508337
DQA1870	DQA187	DQA	187	811	290	811	12832.9	12831.9	0.0836334	0.0290787	0.0642582	0.0117788	0.0181727	0.0236503
DQA187A	DQA187	DQA	187	810	290	810	12832.9	12821.7	0.000277905	0.00206185	6.17729e-06	1.87967e-06	9.72312e-06	0.00120113
DQA187T	DQA187	DQA	187	812	290	812	12832.9	12821.6	0.000269499	0.00198976	5.92885e-06	1.76837e-06	9.21668e-06	0.00115443
DQA2070	DQA207	DQA	207	815	291	815	12832.9	12831.9	0.0836334	0.0290787	0.0642582	0.0117788	0.0181727	0.0236503
DQA207M	DQA207	DQA	207	814	291	814	12832.9	12769.6	6.51895e-16	3.54914e-12	4.18112e-09	0.000504092	0.00748449	5.43745e-06
DQA207V	DQA207	DQA	207	813	291	813	12832.9	12769.6	6.35333e-16	3.39008e-12	4.04257e-09	0.000483364	0.00723751	5.21849e-06
DQA2150	DQA215	DQA	215	817	292	817	12832.9	12831.9	0.0836334	0.0290787	0.0642582	0.0117788	0.0181727	0.0236503
DQA215F	DQA215	DQA	215	816	292	816	12832.9	12816.3	1.63048e-05	0.0235978	6.26694e-06	0.000288506	0.000424472	0.0345332
DQA215L	DQA215	DQA	215	818	292	818	12832.9	12816.3	1.58367e-05	0.0230538	6.05953e-06	0.000277226	0.000409373	0.0337217
DQA2180	DQA218	DQA	218	820	293	820	12832.9	12831.9	0.0836334	0.0290787	0.0642582	0.0117788	0.0181727	0.0236503
DQA218Q	DQA218	DQA	218	819	293	819	12832.9	12822.8	0.000510046	0.00723523	0.490858	0.391011	0.776294	0.0508337
DQA218R	DQA218	DQA	218	821	293	821	12832.9	12822.8	0.000498736	0.00705521	0.485999	0.397438	0.784435	0.0497142
DQB.270	DQB-27	DQB	-27	822	294	822	12832.9	12827.3	0.00598716	0.159391	0.267478	0.600247	0.0180939	0.722582
DQB.27A	DQB-27	DQB	-27	823	294	823	12832.9	12834.9	0.988904	0.174982	1.04777e-06	0.0459394	0.00706679	0.629634
DQB.27S	DQB-27	DQB	-27	824	294	824	12832.9	12818.1	4.19497e-05	6.00342e-05	2.922e-07	0.0544565	0.845709	0.898609
DQB.210	DQB-21	DQB	-21	825	295	825	12832.9	12827.3	0.00598716	0.159391	0.267478	0.600247	0.0180939	0.722582
DQB.21D	DQB-21	DQB	-21	827	295	827	12832.9	12818.1	4.19497e-05	6.00342e-05	2.922e-07	0.0544565	0.845709	0.898609
DQB.21G	DQB-21	DQB	-21	826	295	826	12832.9	12834.9	0.988904	0.174982	1.04777e-06	0.0459394	0.00706679	0.629634
DQB.180	DQB-18	DQB	-18	828	296	828	12832.9	12827.3	0.00598716	0.159391	0.267478	0.600247	0.0180939	0.722582
DQB.18A	DQB-18	DQB	-18	829	296	829	12832.9	12813.5	3.7321e-06	5.15226e-08	2.03147e-05	0.0131981	0.00047276	0.457298
DQB.18V	DQB-18	DQB	-18	830	296	830	12832.9	12763.8	3.3359e-17	1.65218e-14	0.000424792	0.0317913	0.298963	0.72334
DQB.100	DQB-10	DQB	-10	831	297	831	12832.9	12827.3	0.00598716	0.159391	0.267478	0.600247	0.0180939	0.722582
DQB.10A	DQB-10	DQB	-10	833	297	833	12832.9	12834	0.355533	0.301618	0.0177895	0.71913	0.116932	0.485488
DQB.10S	DQB-10	DQB	-10	832	297	832	12832.9	12826.5	0.0037365	0.529717	0.0764169	0.178679	0.156439	0.147906
DQB.90	DQB-9	DQB	-9	834	298	834	12832.9	12827.3	0.00598716	0.159391	0.267478	0.600247	0.0180939	0.722582
DQB.9I	DQB-9	DQB	-9	836	298	836	12832.9	12818.1	4.19497e-05	6.00342e-05	2.922e-07	0.0544565	0.845709	0.898609
DQB.9M	DQB-9	DQB	-9	835	298	835	12832.9	12834.9	0.988904	0.174982	1.04777e-06	0.0459394	0.00706679	0.629634
DQB.60	DQB-6	DQB	-6	837	299	837	12832.9	12827.3	0.00598716	0.159391	0.267478	0.600247	0.0180939	0.722582
DQB.6S	DQB-6	DQB	-6	839	299	839	12832.9	12818.1	4.19497e-05	6.00342e-05	2.922e-07	0.0544565	0.845709	0.898609
DQB.6T	DQB-6	DQB	-6	838	299	838	12832.9	12834.9	0.988904	0.174982	1.04777e-06	0.0459394	0.00706679	0.629634
DQB.50	DQB-5	DQB	-5	840	300	840	12832.9	12827.3	0.00598716	0.159391	0.267478	0.600247	0.0180939	0.722582
DQB.5P	DQB-5	DQB	-5	841	300	841	12832.9	12834.9	0.988904	0.174982	1.04777e-06	0.0459394	0.00706679	0.629634
DQB.5S	DQB-5	DQB	-5	842	300	842	12832.9	12818.1	4.19497e-05	6.00342e-05	2.922e-07	0.0544565	0.845709	0.898609
DQB.40	DQB-4	DQB	-4	843	301	843	12832.9	12827.3	0.00598716	0.159391	0.267478	0.600247	0.0180939	0.722582
DQB.4L	DQB-4	DQB	-4	845	301	845	12832.9	12818.1	4.19497e-05	6.00342e-05	2.922e-07	0.0544565	0.845709	0.898609
DQB.4V	DQB-4	DQB	-4	844	301	844	12832.9	12834.9	0.988904	0.174982	1.04777e-06	0.0459394	0.00706679	0.629634
DQB9F	DQB9	DQB	9	847	302	847	12832.9	12834.6	0.586017	0.628125	1.59682e-08	0.0935437	0.511488	0.00302053
DQB9L	DQB9	DQB	9	848	302	848	12832.9	12832.7	0.14077	0.126491	0.0814744	0.0157709	0.0092999	0.0211855
DQB9Y	DQB9	DQB	9	846	302	846	12832.9	12834.8	0.778349	0.453672	1.63823e-07	0.256665	0.938622	0.0157899
DQB13A	DQB13	DQB	13	850	303	850	12832.9	12774.7	8.6563e-15	7.22323e-12	2.37747e-10	0.100099	0.00310507	0.253627
DQB13G	DQB13	DQB	13	849	303	849	12832.9	12774.7	8.6563e-15	7.22323e-12	2.37747e-10	0.100099	0.00310507	0.253627
DQB14L	DQB14	DQB	14	852	304	852	12832.9	12818.1	4.19497e-05	6.00342e-05	2.922e-07	0.0544565	0.845709	0.898609
DQB14M	DQB14	DQB	14	851	304	851	12832.9	12818.1	4.19497e-05	6.00342e-05	2.922e-07	0.0544565	0.845709	0.898609
DQB26G	DQB26	DQB	26	855	305	855	12832.9	12711.5	1.12657e-28	3.19814e-25	6.39379e-10	6.57637e-05	0.0086841	0.0251649
DQB26L	DQB26	DQB	26	853	305	853	12832.9	12825.3	0.00198782	0.00122083	0.878239	0.036291	0.93989	0.00700849
DQB26Y	DQB26	DQB	26	854	305	854	12832.9	12774.7	8.6563e-15	7.22323e-12	2.37747e-10	0.100099	0.00310507	0.253627
DQB28S	DQB28	DQB	28	856	306	856	12832.9	12832	0.0895921	0.202976	0.00460119	0.012519	0.118537	0.124147
DQB28T	DQB28	DQB	28	857	306	857	12832.9	12832	0.0895921	0.202976	0.00460119	0.012519	0.118537	0.124147
DQB30H	DQB30	DQB	30	860	307	860	12832.9	12828.7	0.012825	0.0583814	0.000522143	0.0289621	0.310736	0.936992
DQB30S	DQB30	DQB	30	858	307	858	12832.9	12832	0.0895921	0.202976	0.00460119	0.012519	0.118537	0.124147
DQB30Y	DQB30	DQB	30	859	307	859	12832.9	12821.9	0.000309385	0.00624088	3.13214e-08	0.938609	0.675038	0.167702
DQB37D	DQB37	DQB	37	863	308	863	12832.9	12832.7	0.14077	0.126491	0.0814744	0.0157709	0.0092999	0.0211855
DQB37I	DQB37	DQB	37	861	308	861	12832.9	12832	0.0895921	0.202976	0.00460119	0.012519	0.118537	0.124147
DQB37Y	DQB37	DQB	37	862	308	862	12832.9	12831.3	0.0568028	0.136164	0.0020947	0.0381731	0.264668	0.25578
DQB38A	DQB38	DQB	38	865	309	865	12832.9	12805.3	5.20968e-08	7.05275e-07	1.33123e-13	0.106659	0.238878	0.416945
DQB38V	DQB38	DQB	38	864	309	864	12832.9	12805.3	5.20968e-08	7.05275e-07	1.33123e-13	0.106659	0.238878	0.416945
DQB45E	DQB45	DQB	45	867	310	867	12832.9	12769.5	6.01287e-16	6.5578e-13	2.0767e-11	0.0324875	0.000458897	0.554835
DQB45G	DQB45	DQB	45	866	310	866	12832.9	12769.5	6.01287e-16	6.5578e-13	2.0767e-11	0.0324875	0.000458897	0.554835
DQB46E	DQB46	DQB	46	868	311	868	12832.9	12832	0.0895921	0.202976	0.00460119	0.012519	0.118537	0.124147
DQB46V	DQB46	DQB	46	869	311	869	12832.9	12832	0.0895921	0.202976	0.00460119	0.012519	0.118537	0.124147
DQB47F	DQB47	DQB	47	870	312	870	12832.9	12832	0.0895921	0.202976	0.00460119	0.012519	0.118537	0.124147
DQB47Y	DQB47	DQB	47	871	312	871	12832.9	12832	0.0895921	0.202976	0.00460119	0.012519	0.118537	0.124147
DQB52L	DQB52	DQB	52	872	313	872	12832.9	12832	0.0895921	0.202976	0.00460119	0.012519	0.118537	0.124147
DQB52P	DQB52	DQB	52	873	313	873	12832.9	12832	0.0895921	0.202976	0.00460119	0.012519	0.118537	0.124147
DQB53L	DQB53	DQB	53	874	314	874	12832.9	12822.7	0.000479106	0.00678145	0.477445	0.400106	0.790205	0.0487438
DQB53Q	DQB53	DQB	53	875	314	875	12832.9	12822.7	0.000479106	0.00678145	0.477445	0.400106	0.790205	0.0487438
DQB55L	DQB55	DQB	55	876	315	876	12832.9	12832	0.0895921	0.202976	0.00460119	0.012519	0.118537	0.124147
DQB55P	DQB55	DQB	55	877	315	877	12832.9	12823.4	0.000710575	0.000818743	0.0472832	0.265722	0.379665	0.000878049
DQB55R	DQB55	DQB	55	878	315	878	12832.9	12831.8	0.0812463	0.0375169	0.543524	0.341375	0.678746	0.068906
DQB56L	DQB56	DQB	56	880	316	880	12832.9	12640.5	3.43796e-44	1.17837e-36	0.47225	0.393475	0.272454	0.34338
DQB56P	DQB56	DQB	56	879	316	879	12832.9	12640.5	3.43796e-44	1.17837e-36	0.47225	0.393475	0.272454	0.34338
DQB57A	DQB57	DQB	57	881	317	881	12832.9	12804.6	3.68888e-08	5.70259e-06	1.91201e-11	0.868001	0.0780713	0.0712799
DQB57D	DQB57	DQB	57	882	317	882	12832.9	12777.1	2.87399e-14	2.28041e-10	6.4185e-22	1	1	1
DQB57S	DQB57	DQB	57	884	317	884	12832.9	12834.7	0.662098	0.637284	0.482788	0.833091	0.717972	0.651201
DQB57V	DQB57	DQB	57	883	317	883	12832.9	12826.2	0.00329184	0.0132678	0.000175861	0.827919	0.0614208	0.0530523
DQB60N	DQB60	DQB	60	886	318	886	12832.9	12834.7	0.678032	0.860382	0.987489	0.323477	0.281086	0.528797
DQB60Y	DQB60	DQB	60	885	318	885	12832.9	12834.7	0.678032	0.860382	0.987489	0.323477	0.281086	0.528797
DQB66D	DQB66	DQB	66	887	319	887	12832.9	12779	7.51979e-14	5.44044e-11	0.00150353	0.0603593	0.377747	0.354293
DQB66E	DQB66	DQB	66	888	319	888	12832.9	12779	7.51979e-14	5.44044e-11	0.00150353	0.0603593	0.377747	0.354293
DQB67I	DQB67	DQB	67	889	320	889	12832.9	12779	7.51979e-14	5.44044e-11	0.00150353	0.0603593	0.377747	0.354293
DQB67V	DQB67	DQB	67	890	320	890	12832.9	12779	7.51979e-14	5.44044e-11	0.00150353	0.0603593	0.377747	0.354293
DQB70E	DQB70	DQB	70	893	321	893	12832.9	12640.3	3.22947e-44	3.31591e-36	0.400719	0.3782	0.241647	0.295508
DQB70G	DQB70	DQB	70	894	321	894	12832.9	12824.7	0.00138766	0.0360918	0.778488	0.0374188	0.14425	0.434011
DQB70R	DQB70	DQB	70	891	321	891	12832.9	12830.1	0.0281178	0.00524649	0.868863	0.027253	0.101398	0.579923
DQB70T	DQB70	DQB	70	892	321	892	12832.9	12834.7	0.690981	0.671829	0.692037	0.82537	0.781659	0.126989
DQB71A	DQB71	DQB	71	899	322	899	12832.9	12810.6	8.46458e-07	1.47818e-06	1.37524e-09	0.000116677	0.0162184	0.0417275
DQB71D	DQB71	DQB	71	898	322	898	12832.9	12640.3	3.22947e-44	3.31591e-36	0.400719	0.3782	0.241647	0.295508
DQB71K	DQB71	DQB	71	895	322	895	12832.9	12832	0.0895921	0.202976	0.00460119	0.012519	0.118537	0.124147
DQB71R	DQB71	DQB	71	897	322	897	12832.9	12834.7	0.690981	0.671829	0.692037	0.82537	0.781659	0.126989
DQB71T	DQB71	DQB	71	896	322	896	12832.9	12727.2	3.16947e-25	3.28296e-21	5.37757e-13	0.173876	0.346676	0.520737
DQB74A	DQB74	DQB	74	900	323	900	12832.9	12832	0.0895921	0.202976	0.00460119	0.012519	0.118537	0.124147
DQB74E	DQB74	DQB	74	901	323	901	12832.9	12727.2	3.19055e-25	3.2505e-21	5.25664e-13	0.17675	0.352478	0.558454
DQB74S	DQB74	DQB	74	902	323	902	12832.9	12713.1	2.62372e-28	5.57044e-25	9.31249e-10	7.55509e-05	0.00967858	0.0276644
DQB75L	DQB75	DQB	75	904	324	904	12832.9	12727.2	3.19055e-25	3.2505e-21	5.25664e-13	0.17675	0.352478	0.558454
DQB75V	DQB75	DQB	75	903	324	903	12832.9	12727.2	3.19055e-25	3.2505e-21	5.25664e-13	0.17675	0.352478	0.558454
DQB77R	DQB77	DQB	77	905	325	905	12832.9	12807.2	1.43873e-07	1.85919e-06	6.9316e-13	0.221371	0.4519	0.668047
DQB77T	DQB77	DQB	77	906	325	906	12832.9	12807.2	1.43873e-07	1.85919e-06	6.9316e-13	0.221371	0.4519	0.668047
DQB84E	DQB84	DQB	84	908	326	908	12832.9	12822.7	0.000479106	0.00678145	0.477445	0.400106	0.790205	0.0487438
DQB84Q	DQB84	DQB	84	907	326	907	12832.9	12822.7	0.000479106	0.00678145	0.477445	0.400106	0.790205	0.0487438
DQB85L	DQB85	DQB	85	909	327	909	12832.9	12822.7	0.000479106	0.00678145	0.477445	0.400106	0.790205	0.0487438
DQB85V	DQB85	DQB	85	910	327	910	12832.9	12822.7	0.000479106	0.00678145	0.477445	0.400106	0.790205	0.0487438
DQB860	DQB86	DQB	86	913	328	913	12832.9	12834.1	0.374208	0.81786	0.658569	0.806875	0.68697	0.664956
DQB86A	DQB86	DQB	86	912	328	912	12832.9	12825.9	0.00278079	0.0595506	0.967079	0.0156194	0.0687514	0.655948
DQB86E	DQB86	DQB	86	911	328	911	12832.9	12822.7	0.000479106	0.00678145	0.477445	0.400106	0.790205	0.0487438
DQB86G	DQB86	DQB	86	914	328	914	12832.9	12832.4	0.111783	0.0251933	0.0815945	0.000275218	0.000247115	0.000240538
DQB870	DQB87	DQB	87	917	329	917	12832.9	12834.1	0.374208	0.81786	0.658569	0.806875	0.68697	0.664956
DQB87F	DQB87	DQB	87	918	329	918	12832.9	12762.3	1.56452e-17	1.29782e-12	1.95332e-09	0.323511	0.917669	0.00112336
DQB87L	DQB87	DQB	87	915	329	915	12832.9	12822.7	0.000479106	0.00678145	0.477445	0.400106	0.790205	0.0487438
DQB87Y	DQB87	DQB	87	916	329	916	12832.9	12820.5	0.00014924	0.00073851	1.89311e-06	0.0703778	0.699469	0.970317
DQB890	DQB89	DQB	89	921	330	921	12832.9	12834.1	0.374208	0.81786	0.658569	0.806875	0.68697	0.664956
DQB89G	DQB89	DQB	89	920	330	920	12832.9	12822.3	0.000389227	0.00643153	0.460356	0.40801	0.809247	0.0452293
DQB89T	DQB89	DQB	89	919	330	919	12832.9	12822.7	0.000479106	0.00678145	0.477445	0.400106	0.790205	0.0487438
DQB900	DQB90	DQB	90	924	331	924	12832.9	12834.1	0.374208	0.81786	0.658569	0.806875	0.68697	0.664956
DQB90I	DQB90	DQB	90	923	331	923	12832.9	12822.3	0.000389227	0.00643153	0.460356	0.40801	0.809247	0.0452293
DQB90T	DQB90	DQB	90	922	331	922	12832.9	12822.7	0.000479106	0.00678145	0.477445	0.400106	0.790205	0.0487438
DQB1160	DQB116	DQB	116	926	332	926	12832.9	12828.7	0.0129754	0.00594633	0.0354483	0.618639	0.655237	0.391171
DQB116I	DQB116	DQB	116	927	332	927	12832.9	12810.6	8.46458e-07	1.47818e-06	1.37524e-09	0.000116677	0.0162184	0.0417275
DQB116V	DQB116	DQB	116	925	332	925	12832.9	12824.8	0.00146777	0.00325626	9.98578e-06	0.000223268	0.0180179	0.162555
DQB1250	DQB125	DQB	125	929	333	929	12832.9	12828.7	0.0129754	0.00594633	0.0354483	0.618639	0.655237	0.391171
DQB125A	DQB125	DQB	125	928	333	928	12832.9	12823	0.00056792	0.00737133	0.50227	0.388678	0.771054	0.051398
DQB125G	DQB125	DQB	125	931	333	931	12832.9	12769.9	7.37442e-16	7.56318e-12	6.54821e-09	0.00150185	0.0177479	1.55933e-05
DQB125S	DQB125	DQB	125	930	333	930	12832.9	12810.6	8.46458e-07	1.47818e-06	1.37524e-09	0.000116677	0.0162184	0.0417275
DQB1260	DQB126	DQB	126	933	334	933	12832.9	12828.7	0.0129754	0.00594633	0.0354483	0.618639	0.655237	0.391171
DQB126H	DQB126	DQB	126	934	334	934	12832.9	12834.7	0.662098	0.637284	0.482788	0.833091	0.717972	0.651201
DQB126Q	DQB126	DQB	126	932	334	932	12832.9	12830.1	0.02855	0.0152295	0.0827034	0.587518	0.581213	0.532264
DQB1300	DQB130	DQB	130	936	335	936	12832.9	12828.7	0.0129754	0.00594633	0.0354483	0.618639	0.655237	0.391171
DQB130Q	DQB130	DQB	130	937	335	937	12832.9	12832.4	0.111783	0.0251933	0.0815945	0.000275218	0.000247115	0.000240538
DQB130R	DQB130	DQB	130	935	335	935	12832.9	12826	0.00293681	0.00028917	0.00518958	0.0295784	0.0256884	0.00151046
DQB1350	DQB135	DQB	135	940	336	940	12832.9	12828.7	0.0129754	0.00594633	0.0354483	0.618639	0.655237	0.391171
DQB135D	DQB135	DQB	135	938	336	938	12832.9	12833.7	0.274961	0.294174	0.743511	0.382641	0.336219	0.0887078
DQB135G	DQB135	DQB	135	939	336	939	12832.9	12826.5	0.0037365	0.529717	0.0764169	0.178679	0.156439	0.147906
DQB1360	DQB136	DQB	136	943	337	943	12832.9	12828.7	0.0129754	0.00594633	0.0354483	0.618639	0.655237	0.391171
DQB136E	DQB136	DQB	136	942	337	942	12832.9	12832.5	0.121837	0.168783	0.160736	0.352662	0.567159	0.578909
DQB136Q	DQB136	DQB	136	941	337	941	12832.9	12828.8	0.0139248	0.00636275	0.0374961	0.607114	0.647922	0.396749
DQB1400	DQB140	DQB	140	946	338	946	12832.9	12828.7	0.0129754	0.00594633	0.0354483	0.618639	0.655237	0.391171
DQB140A	DQB140	DQB	140	944	338	944	12832.9	12834.2	0.406472	0.746008	0.00451782	0.133776	0.205456	0.00198237
DQB140T	DQB140	DQB	140	945	338	945	12832.9	12831.1	0.0527985	0.123509	0.0511266	0.215787	0.302763	0.000460956
DQB1670	DQB167	DQB	167	949	339	949	12832.9	12826	0.00293681	0.00028917	0.00518958	0.0295784	0.0256884	0.00151046
DQB167H	DQB167	DQB	167	948	339	948	12832.9	12774.7	8.6563e-15	7.22323e-12	2.37747e-10	0.100099	0.00310507	0.253627
DQB167R	DQB167	DQB	167	947	339	947	12832.9	12758.9	2.86298e-18	7.93739e-17	1.89384e-13	0.00242385	2.49898e-05	0.087007
DQB1820	DQB182	DQB	182	952	340	952	12832.9	12826	0.00293681	0.00028917	0.00518958	0.0295784	0.0256884	0.00151046
DQB182N	DQB182	DQB	182	951	340	951	12832.9	12831.1	0.0527985	0.123509	0.0511266	0.215787	0.302763	0.000460956
DQB182S	DQB182	DQB	182	950	340	950	12832.9	12834.8	0.833627	0.583366	0.00045482	0.889271	0.703687	0.190587
DQB1850	DQB185	DQB	185	955	341	955	12832.9	12826	0.00293681	0.00028917	0.00518958	0.0295784	0.0256884	0.00151046
DQB185I	DQB185	DQB	185	954	341	954	12832.9	12735.3	1.88771e-23	7.36718e-18	1.90444e-05	0.00112163	3.18245e-05	0.000384289
DQB185T	DQB185	DQB	185	953	341	953	12832.9	12786.6	3.70308e-12	8.81376e-08	0.0614827	0.161461	0.0348361	0.321034
DQB1970	DQB197	DQB	197	957	342	957	12832.9	12826.9	0.00468344	0.00335239	2.696e-14	0.000847486	5.93855e-06	0.0520579
DQB197N	DQB197	DQB	197	958	342	958	12832.9	12832.7	0.14077	0.126491	0.0814744	0.0157709	0.0092999	0.0211855
DQB197S	DQB197	DQB	197	956	342	956	12832.9	12828.1	0.00913982	0.00685459	2.64391e-13	0.00352106	4.66333e-05	0.134265
DQB2030	DQB203	DQB	203	960	343	960	12832.9	12831.6	0.0677534	0.049549	8.74012e-10	0.236542	0.0223157	0.9579
DQB203I	DQB203	DQB	203	959	343	959	12832.9	12814.4	6.09062e-06	0.000451747	2.69086e-09	0.385718	0.00965446	0.0426799
DQB203V	DQB203	DQB	203	961	343	961	12832.9	12824.7	0.00142384	0.0584574	0.701009	0.846901	0.639475	0.0475123
DQB2200	DQB220	DQB	220	963	344	963	12832.9	12831.6	0.0677534	0.049549	8.74012e-10	0.236542	0.0223157	0.9579
DQB220H	DQB220	DQB	220	962	344	962	12832.9	12816	1.40835e-05	0.0009088	9.93845e-09	0.616084	0.0278794	0.0937006
DQB220R	DQB220	DQB	220	964	344	964	12832.9	12826.2	0.00311889	0.0978396	0.904016	0.583807	0.932742	0.103608
DQB2210	DQB221	DQB	221	966	345	966	12832.9	12831.6	0.0677534	0.049549	8.74012e-10	0.236542	0.0223157	0.9579
DQB221H	DQB221	DQB	221	965	345	965	12832.9	12816	1.40835e-05	0.0009088	9.93845e-09	0.616084	0.0278794	0.0937006
DQB221Q	DQB221	DQB	221	967	345	967	12832.9	12826.2	0.00311889	0.0978396	0.904016	0.583807	0.932742	0.103608
DQB2240	DQB224	DQB	224	969	346	969	12832.9	12831.6	0.0677534	0.049549	8.74012e-10	0.236542	0.0223157	0.9579
DQB224Q	DQB224	DQB	224	968	346	968	12832.9	12833.7	0.281914	0.372932	0.0391484	0.69443	0.0825692	0.892256
DQB224R	DQB224	DQB	224	970	346	970	12832.9	12818.1	4.19497e-05	6.00342e-05	2.922e-07	0.0544565	0.845709	0.898609
DPB8L	DPB8	DPB	8	972	347	972	12832.9	12635.8	3.31059e-45	0.537495	0.341735	0.529044	0.95955	0.965955
DPB8V	DPB8	DPB	8	971	347	971	12832.9	12635.8	3.31059e-45	0.537495	0.341735	0.529044	0.95955	0.965955
DPB9F	DPB9	DPB	9	974	348	974	12832.9	12635.8	3.31059e-45	0.537495	0.341735	0.529044	0.95955	0.965955
DPB9H	DPB9	DPB	9	975	348	975	12832.9	12745.9	4.00086e-21	0.016611	0.00298457	0.00333189	0.00717662	0.00598377
DPB9Y	DPB9	DPB	9	973	348	973	12832.9	12734.9	1.5597e-23	0.227133	0.17454	0.0126851	0.0566718	0.0602373
DPB11G	DPB11	DPB	11	976	349	976	12832.9	12573	6.63869e-59	1	1	1	1	1
DPB11L	DPB11	DPB	11	977	349	977	12832.9	12573	6.63869e-59	1	1	1	1	1
DPB33E	DPB33	DPB	33	978	350	978	12832.9	12823	0.000550331	0.651145	0.885622	0.39751	0.445895	0.482729
DPB33Q	DPB33	DPB	33	979	350	979	12832.9	12823	0.000550331	0.651145	0.885622	0.39751	0.445895	0.482729
DPB35F	DPB35	DPB	35	981	351	981	12832.9	12834.9	0.887216	0.225524	0.746667	0.0621943	0.0882828	0.0905893
DPB35L	DPB35	DPB	35	982	351	982	12832.9	12831.5	0.0676558	0.972752	0.697196	0.968509	0.549774	0.51114
DPB35Y	DPB35	DPB	35	980	351	980	12832.9	12834.3	0.445084	0.180595	0.587975	0.040589	0.117112	0.127331
DPB36A	DPB36	DPB	36	983	352	983	12832.9	12766.6	1.39091e-16	0.141798	0.138858	0.271203	0.592234	0.207177
DPB36V	DPB36	DPB	36	984	352	984	12832.9	12766.6	1.39091e-16	0.141798	0.138858	0.271203	0.592234	0.207177
DPB55A	DPB55	DPB	55	985	353	985	12832.9	12765.6	8.33315e-17	0.136968	0.134677	0.272129	0.599953	0.207642
DPB55D	DPB55	DPB	55	986	353	986	12832.9	12754.7	3.38526e-19	0.180064	0.225267	0.376915	0.619539	0.19303
DPB55E	DPB55	DPB	55	987	353	987	12832.9	12832.6	0.130944	0.608886	0.391728	0.519258	0.906041	0.986381
DPB56A	DPB56	DPB	56	988	354	988	12832.9	12754.7	3.38526e-19	0.180064	0.225267	0.376915	0.619539	0.19303
DPB56E	DPB56	DPB	56	989	354	989	12832.9	12754.7	3.38526e-19	0.180064	0.225267	0.376915	0.619539	0.19303
DPB57A	DPB57	DPB	57	992	355	992	12832.9	12834.6	0.584871	0.755002	0.740691	0.646143	0.579495	0.672169
DPB57D	DPB57	DPB	57	991	355	991	12832.9	12644.4	2.54714e-43	0.366131	0.871063	0.63862	0.624016	0.59688
DPB57E	DPB57	DPB	57	990	355	990	12832.9	12644.5	2.6821e-43	0.36825	0.874221	0.642849	0.629096	0.600801
DPB65I	DPB65	DPB	65	993	356	993	12832.9	12679.6	1.19934e-35	0.171313	0.0397743	0.0268735	0.0386597	0.0428677
DPB65L	DPB65	DPB	65	994	356	994	12832.9	12679.6	1.19934e-35	0.171313	0.0397743	0.0268735	0.0386597	0.0428677
DPB69E	DPB69	DPB	69	996	357	996	12832.9	12799	2.10122e-09	0.00592058	0.000943492	0.00255415	0.00517283	0.00208534
DPB69K	DPB69	DPB	69	995	357	995	12832.9	12782.7	5.02766e-13	0.0165786	0.00123834	0.0139908	0.0220895	0.00961166
DPB69R	DPB69	DPB	69	997	357	997	12832.9	12823	0.000550331	0.651145	0.885622	0.39751	0.445895	0.482729
DPB76I	DPB76	DPB	76	1000	358	1000	12832.9	12827.6	0.0067666	0.869181	0.703761	0.335405	0.321577	0.415452
DPB76M	DPB76	DPB	76	999	358	999	12832.9	12768.9	4.59987e-16	0.0274646	0.0181973	0.00730054	0.0223875	0.0208448
DPB76V	DPB76	DPB	76	998	358	998	12832.9	12780.5	1.60745e-13	0.0342271	0.0107228	0.00156251	0.00547372	0.00653763
DPB84D	DPB84	DPB	84	1001	359	1001	12832.9	12670.6	1.30182e-37	0.703637	0.933888	0.242352	0.46351	0.472405
DPB84G	DPB84	DPB	84	1002	359	1002	12832.9	12655.1	5.4884e-41	0.305893	0.124081	0.806688	0.529404	0.504986
DPB84V	DPB84	DPB	84	1003	359	1003	12832.9	12823.9	0.000913226	1.12629e-05	3.98828e-06	1.72912e-05	3.15533e-05	2.14773e-05
DPB85E	DPB85	DPB	85	1004	360	1004	12832.9	12670.6	1.30182e-37	0.703637	0.933888	0.242352	0.46351	0.472405
DPB85G	DPB85	DPB	85	1005	360	1005	12832.9	12670.6	1.30182e-37	0.703637	0.933888	0.242352	0.46351	0.472405
DPB86A	DPB86	DPB	86	1006	361	1006	12832.9	12670.6	1.30182e-37	0.703637	0.933888	0.242352	0.46351	0.472405
DPB86P	DPB86	DPB	86	1007	361	1007	12832.9	12670.6	1.30182e-37	0.703637	0.933888	0.242352	0.46351	0.472405
DPB87M	DPB87	DPB	87	1009	362	1009	12832.9	12670.6	1.30182e-37	0.703637	0.933888	0.242352	0.46351	0.472405
DPB87V	DPB87	DPB	87	1008	362	1008	12832.9	12670.6	1.30182e-37	0.703637	0.933888	0.242352	0.46351	0.472405
DPB960	DPB96	DPB	96	1011	363	1011	12832.9	12802.8	1.49121e-08	0.306537	0.025086	0.518815	0.579069	0.227851
DPB96K	DPB96	DPB	96	1010	363	1010	12832.9	12792.8	8.58559e-11	0.637099	0.590321	0.459759	0.629747	0.740376
DPB96R	DPB96	DPB	96	1012	363	1012	12832.9	12834.9	0.967754	0.0557559	0.0158203	0.0919445	0.201711	0.0470314
DPB1700	DPB170	DPB	170	1014	364	1014	12832.9	12802.8	1.49121e-08	0.306537	0.025086	0.518815	0.579069	0.227851
DPB170I	DPB170	DPB	170	1013	364	1013	12832.9	12792.4	7.25446e-11	0.63118	0.596784	0.460211	0.628335	0.739163
DPB170T	DPB170	DPB	170	1015	364	1015	12832.9	12834.9	0.923412	0.0544445	0.0154426	0.0917374	0.200497	0.0467482
DPB1780	DPB178	DPB	178	1017	365	1017	12832.9	12803.1	1.69052e-08	0.312299	0.0259442	0.529047	0.589734	0.234483
DPB178L	DPB178	DPB	178	1016	365	1016	12832.9	12757.6	1.49973e-18	0.10746	0.00450187	0.198211	0.160734	0.121924
DPB178M	DPB178	DPB	178	1018	365	1018	12832.9	12822.7	0.000475798	0.600641	0.800041	0.496588	0.339285	0.849544
DPB1940	DPB194	DPB	194	1020	366	1020	12832.9	12806.5	9.87945e-08	0.302793	0.022744	0.507255	0.575509	0.224534
DPB194Q	DPB194	DPB	194	1019	366	1019	12832.9	12823.1	0.000590544	0.296706	0.436727	0.0175216	0.0808018	0.0979071
DPB194R	DPB194	DPB	194	1021	366	1021	12832.9	12779	7.72017e-14	0.087989	0.00353233	0.039393	0.11292	0.0245004
DPB2050	DPB205	DPB	205	1023	367	1023	12832.9	12806.5	9.87945e-08	0.302793	0.022744	0.507255	0.575509	0.224534
DPB205M	DPB205	DPB	205	1024	367	1024	12832.9	12834.7	0.665115	0.984256	0.767123	0.825885	0.95995	0.862896
DPB205V	DPB205	DPB	205	1022	367	1022	12832.9	12806.8	1.17418e-07	0.287005	0.027676	0.561982	0.582108	0.243926
DPB2150	DPB215	DPB	215	1026	368	1026	12832.9	12806.5	9.87945e-08	0.302793	0.022744	0.507255	0.575509	0.224534
DPB215I	DPB215	DPB	215	1025	368	1025	12832.9	12813	2.84442e-06	0.90523	0.183761	0.800903	0.742198	0.757198
DPB215T	DPB215	DPB	215	1027	368	1027	12832.9	12823.9	0.000913226	1.12629e-05	3.98828e-06	1.72912e-05	3.15533e-05	2.14773e-05
