# Supplementary material for: Amino acid residues in five separate HLA genes can explain most of the known associations between the MHC and primary biliary cholangitis
Source: PLoS Genet. 2018 Dec 3;14(12):e1007833. doi: 10.1371/journal.pgen.1007833 (PMC6292650; doi:10.1371/journal.pgen.1007833)
Supplement: S2 Spreadsheet — (XLSX) [file pgen.1007833.s030.xlsx]

## Sheet: Fig2spreadsheet
V1	V2	V3	V4	V5	V6	SNPno	SNPname	nullAIC	altAIC	Pval	ConditionOn1$Pval	ConditionOn2$Pval	ConditionOn3$Pval	ConditionOn4$Pval	ConditionOn5$Pval
6	rs7740510	0	25713491	G	A	1	rs7740510_G	12832.9	12829.4	0.0193918	0.00507293	0.00967351	0.0173697	0.0223811	0.0161632
6	rs742132	0	25715550	G	A	2	rs742132_G	12832.3	12832	0.12851	0.13578	0.160983	0.0915184	0.145597	0.186595
6	rs13191296	0	25792585	A	G	3	rs13191296_A	12832.9	12815.5	1.06942e-05	7.44128e-05	0.000567238	2.73189e-06	0.000139613	0.000184286
6	rs9379780	0	25815150	G	A	4	rs9379780_G	12832.9	12829.8	0.024047	0.0154841	0.0261569	0.00424324	0.0131935	0.024827
6	rs16890972	0	25835427	A	G	5	rs16890972_A	12832.9	12834.9	0.868368	0.762363	0.83524	0.864222	0.881972	0.945565
6	rs34932751	0	25870220	G	A	6	rs34932751_G	12832.9	12831.5	0.0660563	0.0381917	0.0561826	0.0580449	0.0606648	0.0612134
6	rs4712969	0	25872171	A	G	7	rs4712969_A	12832.9	12817.3	2.76732e-05	0.000175647	0.000784314	5.53105e-06	0.000212918	0.000327816
6	rs1892250	0	25877003	A	G	8	rs1892250_A	12832.3	12816.7	2.73531e-05	0.000173482	0.000775863	5.49945e-06	0.000211566	0.000326134
6	rs2328893	0	25878218	A	G	9	rs2328893_A	12832.3	12832.3	0.160107	0.165523	0.27801	0.0812368	0.175692	0.267739
6	rs6910549	0	25888790	A	G	10	rs6910549_A	12832.3	12823.6	0.00106665	0.00299862	0.00739603	9.77435e-05	0.0021193	0.00336784
6	rs1892253	0	25890293	A	C	11	rs1892253_A	12830.1	12821.5	0.00110942	0.00311387	0.00766129	0.00010317	0.0022319	0.00353586
6	rs1324082	0	25909950	A	G	12	rs1324082_A	12832.9	12831.7	0.0740094	0.0952891	0.173781	0.038107	0.114522	0.186069
6	rs12182983	0	25926734	A	G	13	rs12182983_A	12832.9	12828.9	0.0144821	0.0274259	0.060944	0.0106703	0.0342255	0.0613251
6	rs6913879	0	25928407	G	A	14	rs6913879_G	12831.7	12830.4	0.0696651	0.0914059	0.168438	0.0361582	0.11053	0.180665
6	rs6940698	0	25929559	A	G	15	rs6940698_A	12832.9	12820.1	0.000120459	0.000668486	0.00268522	2.73875e-05	0.000918338	0.00132136
6	rs17342717	0	25929749	A	G	16	rs17342717_A	12832.9	12831.5	0.0671539	0.0480457	0.112351	0.168301	0.188205	0.121133
6	rs13199775	0	25936761	T	A	17	rs13199775_T	12832.9	12820	0.000115412	0.000636676	0.00249489	2.49514e-05	0.000831399	0.00120251
6	rs1324088	0	25949101	A	G	18	rs1324088_A	12829	12824.7	0.0121246	0.0266943	0.0588542	0.0024392	0.0240654	0.03273
6	rs1324087	0	25949387	A	G	19	rs1324087_A	12832.9	12828.4	0.010571	0.0235355	0.0528317	0.00211297	0.0214417	0.0295074
6	rs4712976	0	25950182	A	G	20	rs4712976_A	12828.4	12827.3	0.0800961	0.105454	0.167848	0.0812926	0.106416	0.166027
6	rs1408272	0	25950930	C	A	21	rs1408272_C	12832.9	12833.6	0.265547	0.254242	0.46738	0.54664	0.64442	0.467968
6	rs1165148	0	25952689	A	C	22	rs1165148_A	12832.9	12832.3	0.109066	0.187957	0.324175	0.0875934	0.230641	0.297938
6	rs1165189	0	25957758	C	A	23	rs1165189_C	12830.1	12829.4	0.100565	0.178116	0.307271	0.0813079	0.217431	0.281774
6	rs1182814	0	25967533	G	A	24	rs1182814_G	12832.9	12832.3	0.111101	0.193308	0.339281	0.092542	0.239734	0.308049
6	rs1408271	0	25967600	A	T	25	rs1408271_A	12832.9	12831.2	0.0544547	0.0723593	0.0985876	0.042179	0.0640637	0.106249
6	rs1165164	0	25971460	A	G	26	rs1165164_A	12832.9	12832.3	0.105338	0.19904	0.350322	0.0973766	0.26943	0.347633
6	rs1165162	0	25971584	A	G	27	rs1165162_A	12832.9	12832.3	0.111101	0.193308	0.339281	0.092542	0.239734	0.308049
6	rs1165158	0	25972877	A	C	28	rs1165158_A	12824.6	12824.1	0.116243	0.203043	0.353573	0.0984567	0.250929	0.319695
6	rs1165205	0	25978521	T	A	29	rs1165205_T	12832.3	12834.3	0.949445	0.974271	0.830335	0.903023	0.881792	0.916138
6	rs501220	0	25981004	A	C	30	rs501220_A	12832.3	12826.2	0.00452231	0.0115016	0.0312303	0.000883259	0.0104322	0.015888
6	rs13198474	0	25982402	A	G	31	rs13198474_A	12832.9	12817.4	2.85915e-05	0.000209825	0.00171208	1.10957e-05	0.000482208	0.000667621
6	rs629444	0	25993793	A	G	32	rs629444_A	12832.9	12825.3	0.00192185	0.00501174	0.0137268	0.000259279	0.00492134	0.0070241
6	rs9467632	0	25997685	G	A	33	rs9467632_G	12832.9	12826	0.00281436	0.0087221	0.0225257	0.000496427	0.00989465	0.0131534
6	rs3734523	0	26033966	A	G	34	rs3734523_A	12829.5	12809.6	2.84282e-06	1.90522e-05	0.000112866	3.6104e-07	2.00644e-05	3.36421e-05
6	rs6940007	0	26039936	C	A	35	rs6940007_C	12832.9	12824.2	0.00108649	0.0042215	0.0142863	0.000244685	0.004718	0.00653532
6	rs17587226	0	26070283	A	G	36	rs17587226_A	12832.3	12821.4	0.000320236	0.0012042	0.00596032	5.87366e-05	0.00186102	0.00254831
6	rs76757832	0	26077610	A	G	37	rs76757832_A	12832.9	12834.8	0.841172	0.76962	0.928002	0.98072	0.913758	0.886045
6	rs13196552	0	26082183	G	A	38	rs13196552_G	12832.9	12827.2	0.00543826	0.0157499	0.0509981	0.00192856	0.0307451	0.0389307
6	rs13212534	0	26090989	A	G	39	rs13212534_A	12788	12769.2	5.26329e-06	4.59497e-05	0.000422408	1.82375e-06	0.000108814	0.000168055
6	rs17587597	0	26094430	A	G	40	rs17587597_A	12832.9	12824.8	0.00150198	0.0061232	0.020061	0.000448347	0.00933056	0.0122544
6	rs16891235	0	26125521	G	A	41	rs16891235_G	12832.9	12827.7	0.00740196	0.0203425	0.0645759	0.00277863	0.0402712	0.0509129
6	rs3734528	0	26130223	G	A	42	rs3734528_G	12832.3	12827.1	0.00706366	0.0196481	0.062818	0.00266107	0.0385774	0.0487139
6	rs10484433	0	26138471	A	C	43	rs10484433_A	12832.9	12827.5	0.0064094	0.0185788	0.0600117	0.00248559	0.0368212	0.0474397
6	rs11751732	0	26152043	A	G	44	rs11751732_A	12830	12831.9	0.822384	0.991723	0.970431	0.903083	0.680559	0.603814
6	rs9689245	0	26158824	A	G	45	rs9689245_A	12832.3	12833.9	0.540026	0.394109	0.460819	0.314954	0.763918	0.838124
6	rs13220395	0	26163347	A	G	46	rs13220395_A	12832.3	12823.8	0.00117798	0.00501706	0.0172213	0.000360151	0.0076923	0.010462
6	rs16891264	0	26180424	G	A	47	rs16891264_G	12832.9	12824	0.000957819	0.0037616	0.0131619	0.000239529	0.00552663	0.00778967
6	rs2071303	0	26199315	G	A	48	rs2071303_G	12829.5	12822.7	0.00288161	0.00370921	0.0208327	0.00284742	0.0130136	0.0265357
6	rs1800562	0	26201120	A	G	49	rs1800562_A	12831.7	12830.6	0.075196	0.0560025	0.135901	0.178013	0.22816	0.141166
6	rs17596719	0	26205173	A	G	50	rs17596719_A	12832.9	12834.1	0.385254	0.308208	0.360109	0.206407	0.504874	0.57499
6	rs198854	0	26212036	A	G	51	rs198854_A	12829.5	12826.9	0.0315606	0.0541253	0.156255	0.0589234	0.0648546	0.0944266
6	rs198846	0	26215442	A	G	52	rs198846_A	12831.7	12832.9	0.35004	0.251621	0.344552	0.369937	0.279277	0.314968
6	rs198844	0	26216261	C	G	53	rs198844_C	12832.3	12829.7	0.031069	0.0531978	0.156408	0.0583825	0.0642021	0.0930753
6	rs16891315	0	26219735	G	A	54	rs16891315_G	12832.9	12826.7	0.0041216	0.0117583	0.0425247	0.00141024	0.023065	0.0315619
6	rs198838	0	26221319	A	G	55	rs198838_A	12823.4	12821.1	0.0379062	0.0636629	0.176487	0.0686173	0.0753294	0.107697
6	rs198837	0	26221377	T	A	56	rs198837_T	12804.9	12802.2	0.0312551	0.0533699	0.158154	0.0583421	0.0632463	0.0932531
6	rs13161	0	26222681	G	A	57	rs13161_G	12832.9	12830.2	0.0310919	0.0527715	0.152733	0.0574975	0.0631939	0.0918974
6	rs707896	0	26224403	A	G	58	rs707896_A	12832.9	12831.6	0.0697981	0.0816544	0.220589	0.166779	0.219949	0.243941
6	rs198829	0	26226872	A	G	59	rs198829_A	12810.2	12807.1	0.0238574	0.0379809	0.123352	0.0469987	0.0516526	0.0777553
6	rs198828	0	26227438	G	A	60	rs198828_G	12832.3	12828.7	0.0182443	0.0296105	0.101472	0.0374156	0.0411911	0.0633316
6	rs198826	0	26229132	G	A	61	rs198826_G	12832.9	12829.5	0.0200637	0.0341973	0.113302	0.0416594	0.0445316	0.0678368
6	rs198825	0	26230481	A	G	62	rs198825_A	12832.3	12828.9	0.0196499	0.0333823	0.111257	0.0402637	0.042686	0.0649061
6	rs198821	0	26231608	A	G	63	rs198821_A	12832.9	12829.3	0.0185703	0.0309546	0.105424	0.0389279	0.0448397	0.0667967
6	rs16891334	0	26232282	G	A	64	rs16891334_G	12832.3	12823.9	0.00128131	0.00400737	0.0164588	0.00033885	0.00761115	0.0113489
6	rs198819	0	26232409	G	A	65	rs198819_G	12829.5	12826	0.0189089	0.031954	0.107539	0.0400413	0.0443028	0.0671726
6	rs198816	0	26235163	G	A	66	rs198816_G	12832.3	12828.9	0.0196499	0.0333822	0.11125	0.0403459	0.0427636	0.0650007
6	rs198811	0	26236425	G	A	67	rs198811_G	12832.9	12828.2	0.00954677	0.0144259	0.0459415	0.0115863	0.0166854	0.0223676
6	rs198809	0	26236745	G	A	68	rs198809_G	12832.9	12829.5	0.0200415	0.0338773	0.112533	0.0409075	0.0434031	0.0659739
6	rs707899	0	26237927	A	G	69	rs707899_A	12832.9	12830.8	0.043628	0.0496328	0.155612	0.118029	0.153618	0.176436
6	rs198806	0	26241595	A	G	70	rs198806_A	12832.9	12827.7	0.00725585	0.0105383	0.0357205	0.00888975	0.0135501	0.0186017
6	rs16891359	0	26256979	G	A	71	rs16891359_G	12832.3	12834	0.590371	0.665924	0.752771	0.783245	0.736166	0.790565
6	rs3857546	0	26265741	A	G	72	rs3857546_A	12832.9	12817.4	2.83587e-05	8.16075e-06	0.000136221	4.16642e-07	4.48066e-05	9.16008e-05
6	rs7749823	0	26266058	C	A	73	rs7749823_C	12832.9	12817.3	2.74731e-05	7.88694e-06	0.000131091	3.84842e-07	4.25381e-05	7.79374e-05
6	rs9379829	0	26280198	A	G	74	rs9379829_A	12832.3	12823.9	0.00122803	0.00139128	0.00405904	0.00313865	0.00660449	0.00756986
6	rs9379831	0	26283831	A	C	75	rs9379831_A	12832.3	12829.3	0.0258595	0.0197262	0.0440512	0.0297432	0.0516544	0.0631057
6	rs806977	0	26297594	G	A	76	rs806977_G	12832.9	12826	0.00292717	0.0088136	0.0122231	0.00834235	0.0177531	0.0130824
6	rs1341758	0	26308497	A	G	77	rs1341758_A	12832.9	12833.9	0.308617	0.248275	0.188333	0.220037	0.241221	0.169062
6	rs989710	0	26314053	A	C	78	rs989710_A	12832.9	12832.7	0.140265	0.119348	0.0863781	0.0944737	0.0959699	0.0599508
6	rs10946808	0	26341366	G	A	79	rs10946808_G	12829.5	12820.6	0.000922849	0.000910457	0.00295524	0.00138394	0.00401418	0.00519877
6	rs9393691	0	26380808	G	A	80	rs9393691_G	12830.1	12820.3	0.000577302	0.000518958	0.00200435	0.000618509	0.00319563	0.00532211
6	rs9393692	0	26384629	A	G	81	rs9393692_A	12832.9	12826.6	0.00389985	0.00792866	0.0164344	0.00503774	0.02027	0.0194888
6	rs6939589	0	26397182	A	G	82	rs6939589_A	12832.3	12827.8	0.0106447	0.022694	0.0415734	0.0134059	0.0334629	0.0393114
6	rs9379842	0	26397289	G	A	83	rs9379842_G	12832.9	12822.7	0.000475023	0.000412667	0.00159624	0.000489671	0.0025994	0.00432872
6	rs9379844	0	26399506	A	G	84	rs9379844_A	12829.5	12819.7	0.000572367	0.000513949	0.00195655	0.000604337	0.0031278	0.0051523
6	rs10484439	0	26417887	A	G	85	rs10484439_A	12832.9	12808.4	2.60661e-07	3.87013e-06	5.21374e-05	5.55538e-08	6.69879e-06	1.14834e-05
6	rs6923139	0	26421327	A	G	86	rs6923139_A	12832.3	12814.5	8.75145e-06	0.000107099	0.000765693	2.70918e-06	5.94799e-05	0.000172154
6	rs9467704	0	26427465	A	G	87	rs9467704_A	12832.9	12814.9	7.84573e-06	9.70368e-05	0.000701101	2.23578e-06	5.09166e-05	0.000134083
6	rs1053860	0	26433207	A	G	88	rs1053860_A	12831.7	12833.3	0.502981	0.286055	0.29706	0.619497	0.594599	0.611221
6	rs3778279	0	26433442	G	A	89	rs3778279_G	12832.3	12833.8	0.493815	0.27794	0.288361	0.60621	0.582166	0.597813
6	rs9358927	0	26438471	C	A	90	rs9358927_C	12828.4	12818.3	0.000509529	0.000517844	0.00195947	0.000608251	0.00314181	0.00497956
6	rs2893842	0	26446413	C	A	91	rs2893842_C	12802.9	12793.1	0.000569301	0.000374779	0.00178601	0.000519714	0.0029323	0.00604135
6	rs9366653	0	26462226	A	G	92	rs9366653_A	12832.9	12810.6	8.1817e-07	1.04702e-05	9.40347e-05	2.64893e-07	3.44233e-05	5.52325e-05
6	rs9379851	0	26462759	C	A	93	rs9379851_C	12830.1	12807.3	6.35173e-07	8.34984e-06	7.68411e-05	1.99176e-07	2.71432e-05	4.43503e-05
6	rs6933583	0	26463262	C	A	94	rs6933583_C	12832.9	12822.1	0.00034752	0.00198801	0.00426178	0.000264244	0.00104706	0.00160226
6	rs9393705	0	26468990	A	G	95	rs9393705_A	12832.3	12810.2	9.07029e-07	1.07729e-05	9.65488e-05	2.69234e-07	3.51209e-05	5.47881e-05
6	rs4712981	0	26469409	A	G	96	rs4712981_A	12832.3	12822.2	0.000496778	0.0026506	0.00551166	0.000387341	0.00148335	0.00223367
6	rs9393708	0	26470622	G	A	97	rs9393708_G	12832.9	12810.7	8.67921e-07	1.0441e-05	9.39726e-05	2.59476e-07	3.42447e-05	5.34177e-05
6	rs9379855	0	26472909	G	A	98	rs9379855_G	12795.3	12771.9	4.77341e-07	6.33971e-06	6.27367e-05	1.59916e-07	2.17174e-05	3.41801e-05
6	rs9393709	0	26473126	A	G	99	rs9393709_A	12832.9	12834.1	0.371388	0.648734	0.425192	0.136297	0.217844	0.28759
6	rs3734536	0	26473325	G	C	100	rs3734536_G	12832.9	12834.2	0.40516	0.688372	0.459879	0.15371	0.240021	0.313551
6	rs9379856	0	26474815	C	A	101	rs9379856_C	12814.6	12786.1	3.42021e-08	5.42555e-07	6.90024e-06	9.82433e-09	2.23422e-06	3.69444e-06
6	rs12199613	0	26475197	A	G	102	rs12199613_A	12832.9	12834.2	0.405561	0.696565	0.463843	0.15478	0.242349	0.318271
6	rs9379858	0	26475668	G	A	103	rs9379858_G	12832.9	12810.3	7.197e-07	8.8966e-06	8.10238e-05	2.13111e-07	2.87908e-05	4.57091e-05
6	rs9393710	0	26475812	G	A	104	rs9393710_G	12832.3	12795.8	5.47488e-10	1.30336e-08	2.11145e-07	1.29249e-10	5.34793e-08	9.91253e-08
6	rs9379859	0	26477528	A	G	105	rs9379859_A	12832.9	12810.3	7.197e-07	8.8966e-06	8.10238e-05	2.13111e-07	2.87908e-05	4.57091e-05
6	rs12176317	0	26480765	G	A	106	rs12176317_G	12832.9	12809.9	5.84133e-07	6.93278e-06	6.33758e-05	1.45634e-07	2.15489e-05	3.47345e-05
6	rs9393713	0	26481657	A	G	107	rs9393713_A	12832.9	12810.6	8.10076e-07	9.1875e-06	8.08367e-05	1.95206e-07	2.7342e-05	4.35637e-05
6	rs9393714	0	26481719	A	C	108	rs9393714_A	12831.7	12809.3	7.86339e-07	8.90208e-06	7.81859e-05	1.88803e-07	2.69646e-05	4.30614e-05
6	rs9379870	0	26482389	G	A	109	rs9379870_G	12832.3	12822	0.000439703	0.00231609	0.00492232	0.00030511	0.00120775	0.00182451
6	rs2073529	0	26483138	G	A	110	rs2073529_G	12832.9	12810.7	8.76638e-07	9.54349e-06	8.44867e-05	2.02839e-07	2.7438e-05	4.35116e-05
6	rs1985732	0	26484140	G	A	111	rs1985732_G	12832.9	12821.3	0.000223997	0.00123001	0.00195076	0.000103037	0.000503711	0.000868347
6	rs13218591	0	26484811	G	A	112	rs13218591_G	12832.9	12824.3	0.00115844	0.00557645	0.0106576	0.000809832	0.00270098	0.00440701
6	rs1977	0	26485525	G	A	113	rs1977_G	12832.9	12810.2	6.91642e-07	8.18714e-06	7.30981e-05	1.68378e-07	2.40223e-05	3.82621e-05
6	rs2072806	0	26493072	G	C	114	rs2072806_G	12832.3	12810.3	9.78179e-07	1.0545e-05	0.000106614	2.3294e-07	3.66411e-05	6.31895e-05
6	rs3799378	0	26512353	G	A	115	rs3799378_G	12831.1	12819.4	0.000207498	0.000508944	0.00109255	3.22024e-05	0.000477203	0.000713158
6	rs55676749	0	26513795	G	A	116	rs55676749_G	12832.9	12833.6	0.258287	0.30583	0.299138	0.264829	0.409532	0.419646
6	rs3799380	0	26575161	G	A	117	rs3799380_G	12832.9	12819.1	7.17438e-05	0.000829122	0.00460715	9.53081e-05	0.00177714	0.00371068
6	rs9366658	0	26577845	A	G	118	rs9366658_A	12832.9	12820.9	0.000180892	0.00218517	0.0113155	0.000364807	0.00574808	0.00905226
6	rs9358944	0	26577854	C	A	119	rs9358944_C	12832.9	12820.9	0.000180892	0.00218517	0.0113155	0.000364807	0.00574808	0.00905226
6	rs9358945	0	26580093	G	A	120	rs9358945_G	12832.9	12820.9	0.000188536	0.00220789	0.0114942	0.000376466	0.00592656	0.00933569
6	rs7773938	0	26582023	A	G	121	rs7773938_A	12832.3	12820.5	0.000201135	0.00230489	0.0119059	0.000391948	0.00611415	0.00958085
6	rs6456728	0	26585758	A	G	122	rs6456728_A	12832.3	12818.1	5.69514e-05	0.000685652	0.00412404	8.23831e-05	0.00160583	0.00337999
6	rs9358946	0	26586906	A	G	123	rs9358946_A	12831.7	12819.9	0.000205326	0.00233701	0.0120431	0.000397821	0.00617899	0.0097058
6	rs16891725	0	26587129	A	G	124	rs16891725_A	12832.9	12807.3	1.5157e-07	2.38314e-06	2.84709e-05	4.61363e-08	1.04398e-05	1.92469e-05
6	rs7756567	0	26589621	C	A	125	rs7756567_C	12830.6	12818.7	0.00019162	0.00218764	0.0114142	0.000368122	0.00584941	0.00921144
6	rs2093169	0	26603078	A	G	126	rs2093169_A	12825.3	12813.7	0.000220614	0.00234912	0.0120965	0.000397477	0.00616793	0.00964092
6	rs13194984	0	26608542	A	C	127	rs13194984_A	12832.9	12834.4	0.487844	0.558092	0.669002	0.986342	0.76714	0.987838
6	rs3799383	0	26618727	A	G	128	rs3799383_A	12824	12798.2	1.35871e-07	2.4503e-06	2.69084e-05	3.89312e-08	8.18737e-06	1.49714e-05
6	rs6920256	0	26645780	A	G	129	rs6920256_A	12832.9	12804.4	3.43076e-08	5.84714e-07	7.31558e-06	7.89269e-09	2.06532e-06	3.68545e-06
6	rs9379892	0	26690393	G	A	130	rs9379892_G	12832.9	12828.7	0.0125375	0.00935081	0.0397533	0.0202348	0.0257713	0.023459
6	rs4634439	0	26705983	G	A	131	rs4634439_G	12832.9	12807.7	1.86109e-07	3.8256e-06	4.1629e-05	8.65763e-08	1.5347e-05	2.7189e-05
6	rs7768682	0	26706397	A	T	132	rs7768682_A	12832.9	12832.6	0.128279	0.116086	0.0788178	0.0710843	0.102986	0.0890294
6	rs9379897	0	26709505	G	A	133	rs9379897_G	12832.3	12807.1	1.83223e-07	3.78077e-06	4.12122e-05	8.68094e-08	1.52554e-05	2.69138e-05
6	rs2451731	0	26732801	C	A	134	rs2451731_C	12832.9	12834.4	0.465292	0.696531	0.63979	0.336457	0.515759	0.7405
6	rs2451741	0	26737383	G	A	135	rs2451741_G	12832.3	12833.8	0.459799	0.68853	0.632497	0.330081	0.507042	0.730262
6	rs71557344	0	26745703	G	A	136	rs71557344_G	12832.3	12798.3	1.98433e-09	8.46228e-08	1.68341e-06	5.57767e-10	2.62216e-07	4.89583e-07
6	rs2494711	0	26757400	A	G	137	rs2494711_A	12832.9	12831.4	0.0614888	0.0748672	0.216543	0.121561	0.220117	0.153801
6	rs9467847	0	26817570	G	A	138	rs9467847_G	12832.9	12828.1	0.00943171	0.0115627	0.062191	0.0508871	0.116738	0.0593703
6	rs9467871	0	26849124	A	G	139	rs9467871_A	12830.1	12828.1	0.0450492	0.0785008	0.127454	0.0919821	0.092354	0.118104
6	rs9393777	0	27050006	G	A	140	rs9393777_G	12832.9	12818.1	4.23013e-05	0.000222832	0.00172744	1.3325e-05	0.000898016	0.00168295
6	rs13194491	0	27145059	A	G	141	rs13194491_A	12830.1	12826.7	0.0201537	0.032607	0.0388438	0.0975233	0.113594	0.0556087
6	rs6916301	0	27150237	A	G	142	rs6916301_A	12832.9	12834.8	0.814322	0.672898	0.583677	0.591969	0.782195	0.712042
6	rs6904071	0	27155235	A	G	143	rs6904071_A	12832.3	12817.6	4.26527e-05	0.00072519	0.00462751	0.000199965	0.00295392	0.00369408
6	rs7745603	0	27198383	A	G	144	rs7745603_A	12832.9	12819.6	9.47571e-05	0.00139877	0.00823273	0.000366344	0.00303039	0.00467565
6	rs6913660	0	27199404	A	C	145	rs6913660_A	12832.9	12817.9	3.84386e-05	0.000664541	0.00444276	0.000189745	0.00284567	0.00355007
6	rs1321578	0	27212762	C	A	146	rs1321578_C	12829.5	12831.2	0.55674	0.663691	0.67336	0.673	0.48885	0.555025
6	rs7749319	0	27234439	A	G	147	rs7749319_A	12832.9	12834.8	0.742265	0.863482	0.866825	0.858209	0.651654	0.724696
6	rs13194053	0	27251862	G	A	148	rs13194053_G	12830.1	12813.6	1.64487e-05	0.000316903	0.00218827	7.9838e-05	0.00137374	0.00172352
6	rs911186	0	27258578	G	A	149	rs911186_G	12798.9	12786.3	0.000133046	0.00179345	0.0107769	0.00064897	0.00467695	0.0080314
6	rs13219354	0	27293643	G	A	150	rs13219354_G	12830.1	12803.3	7.82583e-08	3.02418e-06	3.90462e-05	1.61618e-07	1.84498e-05	2.9267e-05
6	rs3800307	0	27293771	T	A	151	rs3800307_T	12832.3	12816.8	2.82332e-05	0.000363911	0.00229348	8.02247e-05	0.00106903	0.00160485
6	rs4452638	0	27337244	A	G	152	rs4452638_A	12832.9	12806.9	1.23156e-07	3.88876e-06	4.64395e-05	1.90893e-07	2.19837e-05	3.36102e-05
6	rs11758636	0	27337540	A	G	153	rs11758636_A	12832.3	12834.1	0.677003	0.671457	0.54385	0.673375	0.718711	0.635358
6	rs6938200	0	27339129	G	A	154	rs6938200_G	12830.1	12817.6	0.000141794	0.00135313	0.00549553	0.000242871	0.00268637	0.00351997
6	rs6932590	0	27356910	G	A	155	rs6932590_G	12831.7	12819.5	0.00016138	0.00038179	0.00302946	6.2274e-05	0.000774147	0.00130611
6	rs3800316	0	27364081	C	A	156	rs3800316_C	12832.3	12820.5	0.00020747	0.000336101	0.0029624	4.26191e-05	0.000536752	0.000980846
6	rs7746199	0	27369303	A	G	157	rs7746199_A	12831.7	12820.7	0.000314887	0.000105778	0.00128826	4.4779e-06	0.000218724	0.000374966
6	rs4559087	0	27374987	A	G	158	rs4559087_A	12832.9	12834.1	0.3781	0.254111	0.323314	0.0511725	0.129692	0.304537
6	rs7771953	0	27379322	A	G	159	rs7771953_A	12832.3	12833.1	0.266795	0.159981	0.214083	0.0244855	0.0832989	0.169115
6	rs2235233	0	27387831	G	A	160	rs2235233_G	12832.3	12833.3	0.310145	0.229734	0.239737	0.0671801	0.20696	0.352198
6	rs2893910	0	27391233	A	T	161	rs2893910_A	12832.9	12822.1	0.000354902	0.000121813	0.00139485	4.8676e-06	0.000238641	0.000395411
6	rs6923811	0	27397755	G	A	162	rs6923811_G	12828.4	12822.3	0.00455072	0.00195847	0.0168917	0.000335871	0.00353645	0.0109296
6	rs9368501	0	27403061	G	A	163	rs9368501_G	12832.9	12833.3	0.207931	0.115141	0.163232	0.0156893	0.0549932	0.124295
6	rs9461357	0	27404491	A	G	164	rs9461357_A	12832.3	12834.2	0.72351	0.865315	0.687551	0.571494	0.521858	0.347598
6	rs17739310	0	27404754	A	G	165	rs17739310_A	12821.7	12823.5	0.661569	0.786525	0.618305	0.505424	0.463273	0.30071
6	rs721600	0	27406884	A	G	166	rs721600_A	12823.4	12821.7	0.0540984	0.0998864	0.210834	0.141828	0.177033	0.103785
6	rs9461362	0	27411906	A	G	167	rs9461362_A	12832.9	12834.9	0.950262	0.939069	0.881769	0.711866	0.711699	0.475353
6	rs7744655	0	27492048	A	G	168	rs7744655_A	12830.6	12832.2	0.543655	0.981142	0.978023	0.772754	0.373347	0.403051
6	rs13195040	0	27521903	G	A	169	rs13195040_G	12832.9	12806	7.86715e-08	2.49988e-06	4.25868e-05	2.62531e-08	7.63756e-06	1.37785e-05
6	rs7749305	0	27554545	G	A	170	rs7749305_G	12832.9	12806.1	8.27822e-08	6.16278e-06	7.81849e-05	4.7781e-08	3.72469e-06	7.39276e-06
6	rs6931577	0	27584306	A	C	171	rs6931577_A	12832.9	12834.9	0.939793	0.201434	0.377625	0.219724	0.402124	0.391776
6	rs6904596	0	27599278	A	G	172	rs6904596_A	12832.3	12809	4.91618e-07	3.45899e-05	0.000405974	3.66804e-07	2.28659e-05	4.44414e-05
6	rs9468152	0	27600885	C	A	173	rs9468152_C	12824.5	12824.1	0.125706	0.104482	0.310795	0.197188	0.301041	0.175569
6	rs2064092	0	27619350	A	C	174	rs2064092_A	12832.9	12834.9	0.912464	0.921788	0.8464	0.997045	0.900232	0.762199
6	rs6934794	0	27627324	A	G	175	rs6934794_A	12832.3	12834.2	0.701412	0.60043	0.881422	0.532555	0.488402	0.279664
6	rs9468159	0	27630353	A	G	176	rs9468159_A	12831.1	12833	0.690106	0.643242	0.736842	0.549498	0.670759	0.395863
6	rs10484399	0	27642507	G	A	177	rs10484399_G	12832.9	12808.3	2.51114e-07	1.08812e-05	0.000180648	1.38653e-07	3.13097e-05	6.06365e-05
6	rs10946938	0	27658775	C	A	178	rs10946938_C	12829.5	12831.2	0.567631	0.501546	0.697569	0.421659	0.424023	0.251504
6	rs13217599	0	27694209	G	A	179	rs13217599_G	12832.3	12825	0.00223336	0.00574047	0.00979526	0.0405875	0.0513128	0.0215488
6	rs16867901	0	27764055	A	G	180	rs16867901_A	12832.9	12834.7	0.65874	0.993756	0.946032	0.697217	0.257056	0.267501
6	rs16867911	0	27770183	A	C	181	rs16867911_A	12832.9	12834.8	0.715443	0.943062	0.9944	0.741573	0.281545	0.290779
6	rs9295739	0	27770374	A	G	182	rs9295739_A	12832.9	12834.7	0.65874	0.993756	0.946032	0.697217	0.257056	0.267501
6	rs2393997	0	27778676	A	C	183	rs2393997_A	12832.9	12834.3	0.424897	0.370969	0.429895	0.156427	0.569734	0.791542
6	rs9380010	0	27791551	G	A	184	rs9380010_G	12832.9	12826.3	0.00333628	0.0254576	0.0250502	0.0012914	0.0069165	0.0217254
6	rs9393848	0	27796348	A	G	185	rs9393848_A	12832.9	12826	0.00288458	0.022968	0.0227073	0.00112351	0.00606788	0.0192448
6	rs9468202	0	27796609	G	A	186	rs9468202_G	12832.9	12834.5	0.524268	0.815821	0.697346	0.47775	0.156003	0.163581
6	rs9468203	0	27796646	G	A	187	rs9468203_G	12830.1	12823	0.00252043	0.0207101	0.020397	0.000966769	0.00533305	0.0171991
6	rs9295740	0	27797481	A	G	188	rs9295740_A	12831.1	12812.6	5.77014e-06	0.000193519	0.000809936	5.81371e-06	9.82495e-05	0.000548496
6	rs17750424	0	27809101	G	A	189	rs17750424_G	12793.9	12761.2	3.7017e-09	2.45843e-07	6.47679e-06	1.725e-09	9.05856e-07	1.95288e-06
6	rs17693963	0	27818144	C	A	190	rs17693963_C	12832.9	12807.9	2.0335e-07	9.6575e-06	0.000127325	1.03964e-07	2.21985e-05	4.57867e-05
6	rs4713119	0	27820804	G	A	191	rs4713119_G	12832.3	12833.9	0.507191	0.447767	0.501382	0.18993	0.63864	0.873842
6	rs6901520	0	27822554	A	C	192	rs6901520_A	12832.3	12824	0.00133322	0.0117967	0.011782	0.000435492	0.00278944	0.0105796
6	rs9283880	0	27823222	C	A	193	rs9283880_C	12832.9	12823.8	0.00088421	0.00855341	0.00862993	0.000282663	0.00193382	0.00758999
6	rs9461405	0	27827354	A	C	194	rs9461405_A	12832.9	12824.3	0.00116218	0.0105759	0.00988877	0.00033658	0.002222	0.0086483
6	rs9461406	0	27827743	G	A	195	rs9461406_G	12832.3	12825.5	0.00307466	0.0227639	0.0235805	0.00152161	0.0122143	0.0377188
6	rs7776351	0	27834710	A	G	196	rs7776351_A	12832.3	12823.9	0.00128125	0.0120067	0.0112762	0.000415156	0.00271037	0.0101835
6	rs9295746	0	27838043	G	A	197	rs9295746_G	12829.5	12823.3	0.00404655	0.0277513	0.0290139	0.00204729	0.0155591	0.0462988
6	rs7759217	0	27838442	G	A	198	rs7759217_G	12831.7	12820.5	0.000270627	0.0031777	0.00296374	5.71685e-05	0.000682865	0.00216325
6	rs9468220	0	27840955	A	G	199	rs9468220_A	12832.9	12823.8	0.000885077	0.00760092	0.0078819	0.000298446	0.00435551	0.0113726
6	rs742046	0	27847233	G	A	200	rs742046_G	12832.3	12821.1	0.000274181	0.00313223	0.00294505	5.69146e-05	0.000684187	0.002124
6	rs742047	0	27847359	G	A	201	rs742047_G	12832.9	12823.9	0.000912003	0.00782199	0.00831695	0.000317863	0.00462154	0.0118692
6	rs6915101	0	27849661	A	G	202	rs6915101_A	12816.6	12816.7	0.170259	0.218685	0.168046	0.0788199	0.0276741	0.0318533
6	rs9468226	0	27854157	G	A	203	rs9468226_G	12832.9	12833.2	0.192024	0.328806	0.274748	0.356873	0.315822	0.383631
6	rs9468227	0	27854321	G	A	204	rs9468227_G	12832.9	12832.9	0.159925	0.225	0.18287	0.0884568	0.0306928	0.035531
6	rs10484401	0	27854569	A	T	205	rs10484401_A	12831.7	12822.1	0.000636981	0.00578343	0.00616494	0.00020375	0.00304644	0.00783424
6	rs9295749	0	27875374	A	G	206	rs9295749_A	12832.3	12833.6	0.392736	0.464623	0.395168	0.488494	0.478993	0.676083
6	rs9461412	0	27879633	G	A	207	rs9461412_G	12826.2	12826.7	0.219023	0.364378	0.310391	0.396295	0.35779	0.429415
6	rs200483	0	27882803	A	G	208	rs200483_A	12832.9	12806.1	7.94936e-08	5.8776e-06	6.57335e-05	2.67682e-08	2.77818e-06	5.87563e-06
6	rs200484	0	27883653	G	A	209	rs200484_G	12826.8	12800.1	8.59604e-08	6.28793e-06	6.98018e-05	2.92329e-08	3.05346e-06	6.55268e-06
6	rs370155	0	27890010	C	A	210	rs370155_C	12832.9	12806.9	1.22126e-07	8.66759e-06	9.53899e-05	4.59388e-08	4.36335e-06	8.82778e-06
6	rs2747054	0	27891338	G	A	211	rs2747054_G	12832.9	12805.7	6.57648e-08	4.9272e-06	5.66098e-05	2.23288e-08	2.33056e-06	4.882e-06
6	rs200501	0	27896921	A	G	212	rs200501_A	12832.9	12804.8	4.13535e-08	3.27285e-06	4.0366e-05	1.44632e-08	1.66078e-06	3.40349e-06
6	rs200490	0	27904914	A	C	213	rs200490_A	12832.9	12806.5	9.80723e-08	7.31935e-06	8.4852e-05	3.91566e-08	3.81314e-06	7.83549e-06
6	rs201004	0	27912913	G	A	214	rs201004_G	12826.2	12803	5.12581e-07	3.85375e-05	0.000182855	9.12162e-07	2.26568e-05	7.54173e-05
6	rs34706883	0	27913234	C	A	215	rs34706883_C	12832.9	12809	3.69654e-07	1.60203e-05	0.000248367	1.93983e-07	4.50859e-05	8.52574e-05
6	rs13212651	0	27914964	G	A	216	rs13212651_G	12832.9	12808.7	3.0876e-07	1.35152e-05	0.000215723	1.58006e-07	3.83598e-05	7.25588e-05
6	rs201002	0	27916171	G	A	217	rs201002_G	12832.3	12806.2	1.17596e-07	8.64004e-06	9.86441e-05	4.70001e-08	4.43895e-06	9.08017e-06
6	rs175597	0	27918605	G	A	218	rs175597_G	12832.9	12806.1	7.94936e-08	6.04483e-06	7.06185e-05	3.05005e-08	3.03675e-06	6.34926e-06
6	rs200995	0	27921673	G	A	219	rs200995_G	12832.9	12805.6	6.17226e-08	4.85057e-06	5.86081e-05	2.4737e-08	2.5817e-06	5.33112e-06
6	rs200994	0	27921792	A	C	220	rs200994_A	12831.7	12824.1	0.00188779	0.0140751	0.014416	0.000314579	0.00340122	0.00763288
6	rs200991	0	27923473	A	C	221	rs200991_A	12832.3	12810.9	1.33612e-06	5.79852e-05	0.000331494	7.25588e-07	3.18017e-05	9.84578e-05
6	rs13194781	0	27923618	G	A	222	rs13194781_G	12830.6	12805.8	2.34285e-07	1.04519e-05	0.000172585	1.19728e-07	3.15954e-05	5.98919e-05
6	rs200990	0	27923802	C	A	223	rs200990_C	12832.3	12805.6	8.51071e-08	6.33995e-06	7.51978e-05	3.36395e-08	3.34569e-06	6.84101e-06
6	rs200989	0	27924421	G	A	224	rs200989_G	12832.9	12805.6	6.24393e-08	4.88779e-06	5.89431e-05	2.40589e-08	2.49558e-06	5.19261e-06
6	rs13199772	0	27942064	G	A	225	rs13199772_G	12832.9	12808.4	2.67912e-07	1.19206e-05	0.000192442	1.36231e-07	3.45742e-05	6.38868e-05
6	rs200948	0	27943251	G	A	226	rs200948_G	12832.9	12806.5	9.91776e-08	7.00321e-06	8.17955e-05	3.60706e-08	3.6453e-06	7.41828e-06
6	rs200953	0	27945246	G	A	227	rs200953_G	12832.9	12806.6	1.05518e-07	7.48659e-06	8.75256e-05	4.01869e-08	4.01336e-06	8.06261e-06
6	rs200956	0	27947725	G	A	228	rs200956_G	12832.9	12816.6	1.92921e-05	0.00054329	0.00238586	1.50962e-05	0.000267652	0.00105769
6	rs13219787	0	27969649	A	G	229	rs13219787_A	12832.9	12825.9	0.00266613	0.00699981	0.0120973	0.0485725	0.0637458	0.0269204
6	rs13218875	0	27991991	A	G	230	rs13218875_A	12832.9	12808.9	3.47739e-07	1.22764e-05	0.000150168	8.76268e-08	2.58843e-05	4.56556e-05
6	rs156737	0	28003192	G	A	231	rs156737_G	12832.3	12832.2	0.143073	0.11468	0.127263	0.0086384	0.0538913	0.0953819
6	rs6910968	0	28012160	A	G	232	rs6910968_A	12832.9	12834.7	0.640224	0.58243	0.960836	0.655062	0.942261	0.986905
6	rs276371	0	28018687	T	A	233	rs276371_T	12832.3	12832.1	0.136912	0.107603	0.122743	0.00815221	0.0522731	0.0919687
6	rs149966	0	28063266	G	C	234	rs149966_G	12832.9	12833.4	0.221575	0.149391	0.221295	0.209864	0.329926	0.245798
6	rs149898	0	28066051	A	G	235	rs149898_A	12831.7	12833.7	0.894085	0.721778	0.752399	0.999222	0.506122	0.499773
6	rs156742	0	28071171	A	G	236	rs156742_A	12832.9	12834.5	0.521201	0.82734	0.741286	0.526923	0.182459	0.188732
6	rs149901	0	28073482	A	G	237	rs149901_A	12832.9	12832.3	0.106337	0.332148	0.297043	0.036267	0.105849	0.180085
6	rs156743	0	28075068	G	A	238	rs156743_G	12832.3	12818.9	8.65769e-05	0.00130494	0.00554088	1.82929e-05	0.000431341	0.000569498
6	rs149970	0	28088199	A	G	239	rs149970_A	12830.6	12830	0.108364	0.339697	0.30118	0.0370816	0.108032	0.183824
6	rs149971	0	28090131	A	G	240	rs149971_A	12829.4	12830.3	0.293495	0.192511	0.14064	0.00899609	0.0611164	0.105004
6	rs149974	0	28093075	G	A	241	rs149974_G	12830.1	12831.1	0.319112	0.215602	0.164586	0.0114216	0.0746663	0.124435
6	rs149976	0	28095755	G	A	242	rs149976_G	12832.9	12834	0.353319	0.2412	0.182121	0.013415	0.0840758	0.139756
6	rs149990	0	28106237	A	G	243	rs149990_A	12832.3	12818.3	6.24658e-05	0.000994965	0.00455468	1.40593e-05	0.000350143	0.000467444
6	rs149943	0	28110367	A	G	244	rs149943_A	12824.6	12810.2	5.1151e-05	0.000858592	0.00369428	1.0729e-05	0.000262804	0.000364572
6	rs202906	0	28119631	G	A	245	rs202906_G	12832.3	12820.5	0.000197901	0.00265109	0.00980145	4.92539e-05	0.000976358	0.00138467
6	rs203878	0	28156975	C	A	246	rs203878_C	12829	12828.7	0.130166	0.0798135	0.0630499	0.00319757	0.0332512	0.0556836
6	rs10484404	0	28163474	A	G	247	rs10484404_A	12832.9	12834.9	0.893472	0.201513	0.454839	0.326936	0.612826	0.581315
6	rs13197574	0	28168218	G	A	248	rs13197574_G	12832.9	12808.9	3.48358e-07	1.1414e-05	0.000129571	7.85441e-08	2.38345e-05	4.23948e-05
6	rs9468287	0	28187720	A	C	249	rs9468287_A	12832.3	12817.3	3.6883e-05	0.000643637	0.00392771	2.10892e-05	0.00103057	0.00144741
6	rs4713139	0	28200664	A	G	250	rs4713139_A	12832.9	12816.4	1.6975e-05	0.000413218	0.003053	1.3325e-05	0.000687124	0.00101136
6	rs4713140	0	28205172	A	G	251	rs4713140_A	12832.3	12815.8	1.67292e-05	0.00040744	0.00301745	1.32348e-05	0.000684116	0.00100758
6	rs1225710	0	28208619	G	A	252	rs1225710_G	12831.7	12831.6	0.148333	0.0930162	0.0734502	0.00395575	0.0390002	0.0641913
6	rs3757188	0	28215336	G	A	253	rs3757188_G	12832.3	12815.9	1.75626e-05	0.000422503	0.00310968	1.36889e-05	0.00069941	0.00102941
6	rs1225715	0	28221352	G	A	254	rs1225715_G	12832.9	12833.2	0.18861	0.116536	0.0983635	0.00630884	0.0555118	0.0880812
6	rs13205911	0	28232093	A	G	255	rs13205911_A	12832.9	12808.5	2.82813e-07	9.3787e-06	0.000108568	6.14181e-08	1.97215e-05	3.54045e-05
6	rs1225618	0	28237692	C	A	256	rs1225618_C	12821.3	12821.2	0.146282	0.0884376	0.0721985	0.00387114	0.0381843	0.0622368
6	rs9380064	0	28251097	G	A	257	rs9380064_G	12832.3	12815.7	1.58579e-05	0.00038071	0.00283369	1.19634e-05	0.00063037	0.000934812
6	rs2622315	0	28260546	A	G	258	rs2622315_A	12832.9	12834.8	0.7151	0.131613	0.309904	0.201055	0.397134	0.382238
6	rs1233704	0	28274902	A	G	259	rs1233704_A	12828.8	12827.4	0.0647995	0.204347	0.224344	0.0222694	0.104302	0.185251
6	rs1233701	0	28276705	C	G	260	rs1233701_C	12832.9	12831.4	0.0631259	0.201431	0.222141	0.022116	0.103658	0.184052
6	rs1233699	0	28277137	T	A	261	rs1233699_T	12832.3	12830.9	0.0660157	0.207213	0.22727	0.0230379	0.107034	0.190029
6	rs735765	0	28278276	A	G	262	rs735765_A	12826.8	12809.1	9.29006e-06	0.000213348	0.00160307	4.41306e-06	0.000300128	0.000481015
6	rs1237875	0	28280989	A	G	263	rs1237875_A	12832.3	12830.9	0.0646855	0.204611	0.224608	0.0226302	0.105716	0.187833
6	rs1736891	0	28295080	A	C	264	rs1736891_A	12831.7	12831.1	0.107189	0.051726	0.0365122	0.00163779	0.0201147	0.0335574
6	rs9393908	0	28298809	A	T	265	rs9393908_A	12829.5	12813.7	2.39067e-05	0.000413038	0.0027831	1.34933e-05	0.000718299	0.00104578
6	rs9366717	0	28299036	A	G	266	rs9366717_A	12832.9	12817	2.32754e-05	0.00040447	0.00272742	1.30144e-05	0.000701336	0.00101981
6	rs1150707	0	28305584	A	G	267	rs1150707_A	12824.6	12824.1	0.113198	0.0544367	0.0386457	0.00177637	0.0215518	0.0360261
6	rs9468317	0	28306435	G	A	268	rs9468317_G	12832.9	12815.1	8.46372e-06	9.90905e-05	0.000352125	2.50662e-06	0.000211279	0.000377058
6	rs7206	0	28309117	G	A	269	rs7206_G	12829.4	12829	0.119494	0.0575201	0.0408279	0.00193113	0.0226478	0.0371682
6	rs9380069	0	28311279	G	A	270	rs9380069_G	12832.9	12819.1	7.18884e-05	0.000976517	0.00449148	2.79856e-05	0.00136323	0.00212128
6	rs1150711	0	28316514	G	A	271	rs1150711_G	12830.1	12821.9	0.0013773	0.000422269	0.000868869	5.85682e-06	0.000390496	0.000576481
6	rs9295768	0	28317081	A	G	272	rs9295768_A	12831.7	12813.6	7.09739e-06	8.72639e-05	0.000311698	2.14563e-06	0.00018478	0.000332097
6	rs967005	0	28318667	A	G	273	rs967005_A	12824	12804.9	4.29537e-06	5.26031e-05	0.000201394	1.13754e-06	0.0001098	0.0002021
6	rs13408	0	28320727	A	G	274	rs13408_A	12831.7	12830.2	0.0613995	0.0344887	0.0291482	0.00142266	0.0161859	0.0295609
6	rs1233710	0	28323425	A	G	275	rs1233710_A	12831.7	12829.8	0.0461098	0.0380479	0.0253686	0.0391202	0.0575514	0.0722758
6	rs2235359	0	28323620	C	A	276	rs2235359_C	12832.9	12834.9	0.860403	0.334806	0.45792	0.374743	0.454835	0.45515
6	rs1736895	0	28327805	A	G	277	rs1736895_A	12832.9	12831.3	0.0577831	0.0323177	0.0273584	0.00132265	0.0152402	0.0279843
6	rs10456362	0	28329795	A	G	278	rs10456362_A	12830.6	12811.8	5.10533e-06	0.00010634	0.000732406	1.60946e-06	0.000135256	0.000228565
6	rs12214383	0	28331710	A	G	279	rs12214383_A	12829.5	12828	0.060626	0.0336399	0.028432	0.00138077	0.0159734	0.0294523
6	rs1531681	0	28334857	G	A	280	rs1531681_G	12805.7	12803.8	0.0493125	0.0272851	0.0229056	0.00103089	0.0122466	0.023028
6	rs1778508	0	28337860	G	A	281	rs1778508_G	12832.9	12813.9	4.69443e-06	9.67761e-05	0.000675204	1.39996e-06	0.000113654	0.000199854
6	rs2799077	0	28342576	A	G	282	rs2799077_A	12832.9	12813.8	4.46244e-06	9.52539e-05	0.000665706	1.40779e-06	0.000114281	0.000199816
6	rs11965538	0	28347894	A	G	283	rs11965538_A	12830	12810.8	4.11977e-06	8.76125e-05	0.000616277	1.2726e-06	0.000107106	0.000187572
6	rs1778484	0	28348777	G	A	284	rs1778484_G	12832.9	12819.6	9.38109e-05	6.89825e-05	0.00048206	5.31636e-06	0.000198018	0.000488155
6	rs1419183	0	28350773	C	A	285	rs1419183_C	12832.9	12813.7	4.24147e-06	9.19734e-05	0.000631883	1.31097e-06	0.000107367	0.000189327
6	rs1150726	0	28351021	A	G	286	rs1150726_A	12831.7	12818.6	9.85194e-05	7.17473e-05	0.000498639	5.47625e-06	0.000203207	0.000497476
6	rs1150724	0	28358215	A	G	287	rs1150724_A	12831.7	12818.9	0.000116751	8.50903e-05	0.000580038	6.79904e-06	0.000242416	0.00059357
6	rs6901575	0	28358963	A	G	288	rs6901575_A	12832.3	12813.9	6.39733e-06	0.000129129	0.000908891	2.249e-06	0.000166461	0.000286458
6	rs13211507	0	28365356	G	A	289	rs13211507_G	12832.9	12807.8	1.8969e-07	6.29354e-06	7.71352e-05	3.75993e-08	1.19735e-05	2.36633e-05
6	rs1997660	0	28377642	G	A	290	rs1997660_G	12832.3	12820.3	0.000177451	0.000104556	0.000621457	5.12384e-06	0.000233748	0.00052202
6	rs9468333	0	28379177	A	G	291	rs9468333_A	12832.3	12820.4	0.000189285	0.000112954	0.000668391	5.70585e-06	0.000255456	0.000570731
6	rs16893947	0	28392700	G	A	292	rs16893947_G	12827.4	12829.3	0.786074	0.286418	0.298976	0.278194	0.385834	0.452694
6	rs853690	0	28393461	A	G	293	rs853690_A	12831.7	12820.1	0.000218454	0.00013658	0.000795595	7.09151e-06	0.000307899	0.000672794
6	rs853685	0	28396764	A	G	294	rs853685_A	12832.9	12815.4	1.02026e-05	0.000176406	0.00138763	4.25881e-06	0.000229764	0.000388805
6	rs707907	0	28399219	G	A	295	rs707907_G	12832.3	12820.6	0.000208802	0.000127834	0.000752723	6.6827e-06	0.000290109	0.000652309
6	rs9301	0	28400685	G	A	296	rs9301_G	12826.2	12825.4	0.0931379	0.048996	0.0379485	0.00156028	0.0194961	0.0330323
6	rs853684	0	28402529	G	A	297	rs853684_G	12831.7	12831.1	0.10364	0.0554404	0.0440149	0.0019473	0.0235429	0.0395501
6	rs853683	0	28403018	G	A	298	rs853683_G	12832.9	12821.2	0.000213264	0.000131939	0.00077295	6.90818e-06	0.000299791	0.00066664
6	rs16893970	0	28407274	G	A	299	rs16893970_G	12832.9	12834.8	0.811359	0.283229	0.320663	0.303669	0.427049	0.496775
6	rs853676	0	28407666	A	G	300	rs853676_A	12832.9	12815.7	1.21432e-05	0.000202697	0.00147856	4.77528e-06	0.000250715	0.000427752
6	rs17312661	0	28408315	G	A	301	rs17312661_G	12828.4	12816.7	0.0002191	7.91293e-05	0.00159467	6.63413e-06	0.00105017	0.00119761
6	rs7772827	0	28409122	G	A	302	rs7772827_G	12832.3	12818.1	5.82346e-05	2.04561e-05	0.000127528	7.0031e-07	7.55285e-05	0.000178316
6	rs1416920	0	28410763	G	A	303	rs1416920_G	12831.1	12815.8	3.03441e-05	1.07976e-05	7.43085e-05	2.97311e-07	3.91268e-05	0.000100059
6	rs9468344	0	28417548	C	A	304	rs9468344_C	12829	12813.1	2.32215e-05	7.97589e-06	5.60856e-05	2.12415e-07	2.86921e-05	7.36562e-05
6	rs6912584	0	28417569	G	A	305	rs6912584_G	12832.9	12823.1	0.000588728	0.000270254	0.00154958	7.98731e-06	0.000442098	0.000829555
6	rs12180820	0	28424457	A	G	306	rs12180820_A	12832.3	12818.2	5.95722e-05	2.42225e-05	0.000160343	7.22008e-07	7.69756e-05	0.000184845
6	rs213237	0	28431917	G	A	307	rs213237_G	12821.3	12820.4	0.0928767	0.0510555	0.0489231	0.00264039	0.0312024	0.0469319
6	rs6921919	0	28433180	G	C	308	rs6921919_G	12832.3	12824.5	0.00175717	0.00149748	0.00953959	9.95753e-05	0.00308522	0.00496705
6	rs6922111	0	28433287	A	G	309	rs6922111_A	12832.3	12824.5	0.00175717	0.00149748	0.0095404	9.95857e-05	0.00308594	0.00496939
6	rs213230	0	28438243	G	A	310	rs213230_G	12831.7	12819.2	0.000139105	0.000109588	0.000893618	9.94256e-06	0.000553334	0.000949272
6	rs213228	0	28439231	C	A	311	rs213228_C	12827.2	12816.4	0.000340814	0.00024158	0.00171435	2.17337e-05	0.000717204	0.00118363
6	rs7773051	0	28448295	A	G	312	rs7773051_A	12815.2	12808	0.00241032	0.00190922	0.0129739	0.000428451	0.00693753	0.0100858
6	rs7774981	0	28454889	G	A	313	rs7774981_G	12832.9	12826	0.00291991	0.00318277	0.0281804	0.000658986	0.00915973	0.0125495
6	rs1052215	0	28456137	A	C	314	rs1052215_A	12831.7	12831.2	0.114941	0.0599479	0.0559329	0.00297707	0.0338688	0.0546373
6	rs2531825	0	28457243	A	G	315	rs2531825_A	12831.1	12831	0.146325	0.0757174	0.0709451	0.0045697	0.0452633	0.0680991
6	rs13213152	0	28457677	G	A	316	rs13213152_G	12832.9	12810.5	8.05663e-07	2.48935e-05	0.00027909	2.02995e-07	5.25743e-05	8.48598e-05
6	rs3734563	0	28457704	G	A	317	rs3734563_G	12821.8	12813.8	0.0015576	0.00114064	0.00823972	0.000237833	0.00420758	0.00617677
6	rs7764722	0	28462512	A	G	318	rs7764722_A	12825	12817.3	0.00178434	0.00133894	0.00943482	0.000305059	0.00520121	0.00757927
6	rs9461458	0	28463854	A	G	319	rs9461458_A	12782.9	12773	0.000565128	0.000409777	0.00353648	8.25558e-05	0.00179033	0.00272676
6	rs1361385	0	28466299	G	A	320	rs1361385_G	12832.9	12825.4	0.00204359	0.0015287	0.0105213	0.000342694	0.00577521	0.00841475
6	rs2041230	0	28473494	G	A	321	rs2041230_G	12832.9	12825.2	0.00182756	0.00136211	0.00954439	0.00030221	0.00520117	0.00759533
6	rs2232423	0	28474130	G	A	322	rs2232423_G	12832.9	12809.8	5.46014e-07	1.77067e-05	0.000210082	1.37801e-07	3.66888e-05	6.17384e-05
6	rs2232422	0	28474241	A	G	323	rs2232422_A	12832.9	12834.8	0.792812	0.438057	0.780034	0.61271	0.993988	0.905208
6	rs4357130	0	28475662	C	A	324	rs4357130_C	12832.3	12824.7	0.00190133	0.00142525	0.00994718	0.000315858	0.00539441	0.0079164
6	rs9468370	0	28476919	A	G	325	rs9468370_A	12832.9	12825.1	0.00177999	0.00133344	0.00937958	0.000294498	0.00510321	0.00745412
6	rs13196606	0	28478057	A	G	326	rs13196606_A	12830.6	12823.8	0.00306873	0.003307	0.0290065	0.00068021	0.00949807	0.012947
6	rs6907950	0	28478225	A	G	327	rs6907950_A	12829.5	12821.8	0.00183582	0.00134807	0.00927657	0.000292108	0.00511002	0.00742103
6	rs6908137	0	28478372	C	A	328	rs6908137_C	12831.7	12824	0.00181398	0.00134243	0.00938079	0.000296345	0.00514496	0.00749378
6	rs4254981	0	28479381	C	A	329	rs4254981_C	12830.6	12822	0.00113843	0.000823221	0.00607575	0.000171329	0.00319625	0.00476652
6	rs1124131	0	28488227	C	A	330	rs1124131_C	12832.9	12823.9	0.00093907	0.000661003	0.00506899	0.00013504	0.0026802	0.00396325
6	rs6899389	0	28489119	A	C	331	rs6899389_A	12824.8	12816	0.00103488	0.000719854	0.00539686	0.000144845	0.00282656	0.00415515
6	rs1558205	0	28490241	A	C	332	rs1558205_A	12832.9	12822.1	0.000347241	0.000178662	0.00130558	1.8339e-05	0.00057306	0.000996582
6	rs6922169	0	28490911	A	G	333	rs6922169_A	12832.9	12824.2	0.00105646	0.000746907	0.00562706	0.000155601	0.00298637	0.00442974
6	rs16894091	0	28498116	A	T	334	rs16894091_A	12831.7	12824	0.00176743	0.00183781	0.0178338	0.000355239	0.00546156	0.00759007
6	rs16894095	0	28498209	A	G	335	rs16894095_A	12810.2	12799	0.000282252	0.000181994	0.00168834	2.56307e-05	0.000971636	0.00106583
6	rs3800328	0	28498822	A	G	336	rs3800328_A	12830.6	12821.9	0.00107283	0.00076373	0.00580672	0.000163133	0.00310849	0.00458276
6	rs2859365	0	28499444	G	A	337	rs2859365_G	12831.7	12831.6	0.141514	0.0724875	0.067651	0.00422675	0.0428925	0.0650368
6	rs1339898	0	28503485	A	G	338	rs1339898_A	12832.3	12821.5	0.000341314	0.000181233	0.00132876	1.83281e-05	0.000568518	0.000985924
6	rs7740351	0	28507391	C	A	339	rs7740351_C	12832.3	12823.9	0.00127655	0.000877038	0.00636011	0.000181249	0.00341664	0.00513025
6	rs16894106	0	28508318	A	G	340	rs16894106_A	12831.7	12823.9	0.00171506	0.00179428	0.0175086	0.000341526	0.00530017	0.00731117
6	rs7766356	0	28508517	G	A	341	rs7766356_G	12832.3	12821.2	0.000299386	0.000132042	0.00247741	1.09632e-05	0.00163713	0.00166475
6	rs11752919	0	28511582	G	A	342	rs11752919_G	12832.3	12810.3	9.52651e-07	1.69521e-06	3.5032e-05	1.84523e-06	7.98613e-05	5.77838e-05
6	rs6917130	0	28514800	G	A	343	rs6917130_G	12831.7	12809.6	9.15509e-07	1.57302e-06	3.31094e-05	1.64461e-06	7.36432e-05	5.24598e-05
6	rs916403	0	28516237	G	A	344	rs916403_G	12832.9	12823.3	0.000663111	0.000510677	0.000623758	4.09205e-05	0.0011813	0.00106294
6	rs2531803	0	28519199	C	A	345	rs2531803_C	12832.3	12823	0.000792205	0.000530865	0.000626826	3.81696e-05	0.0011713	0.00108854
6	rs13190937	0	28519223	A	G	346	rs13190937_A	12825.3	12804.4	1.68908e-06	5.15459e-06	0.00015394	5.10347e-06	0.000164938	0.000107963
6	rs2531804	0	28519282	G	A	347	rs2531804_G	12832.3	12806.2	1.15179e-07	1.66426e-07	3.5605e-06	9.63599e-08	6.72613e-06	5.30577e-06
6	rs6902687	0	28521470	G	A	348	rs6902687_G	12831.7	12810.4	1.37124e-06	4.27013e-06	0.000131535	4.22434e-06	0.00013945	9.06681e-05
6	rs6939966	0	28523864	G	A	349	rs6939966_G	12809.2	12787.1	9.19879e-07	1.63153e-06	3.46421e-05	1.81986e-06	8.13931e-05	5.7926e-05
6	rs6903535	0	28525201	G	A	350	rs6903535_G	12832.3	12810	8.1269e-07	1.44738e-06	3.07461e-05	1.53476e-06	6.75368e-05	4.64184e-05
6	rs1041926	0	28534275	G	A	351	rs1041926_G	12832.9	12834.8	0.766555	0.956434	0.879128	0.891244	0.941905	0.996848
6	rs16894128	0	28552144	G	A	352	rs16894128_G	12832.9	12827.9	0.00811238	0.0205104	0.0342055	0.104337	0.0889846	0.0418993
6	rs1029328	0	28555894	G	A	353	rs1029328_G	12830.6	12825	0.005966	0.0168856	0.0295386	0.0889516	0.0796428	0.0401716
6	rs1015811	0	28556065	G	A	354	rs1015811_G	12832.9	12834.4	0.492304	0.44159	0.148315	0.310286	0.34148	0.274428
6	rs7770236	0	28558416	A	G	355	rs7770236_A	12832.9	12822.4	0.000410616	0.00143162	0.035205	0.0358461	0.0380481	0.03484
6	rs2859355	0	28569200	A	G	356	rs2859355_A	12832.9	12834.7	0.683897	0.592612	0.867503	0.845748	0.957468	0.939931
6	rs12661782	0	28574421	G	A	357	rs12661782_G	12831.7	12833.2	0.462055	0.490824	0.63468	0.584592	0.784505	0.744641
6	rs2071966	0	28581304	C	A	358	rs2071966_C	12830.1	12831.7	0.505268	0.561835	0.729875	0.698249	0.908525	0.861144
6	rs722788	0	28591129	C	A	359	rs722788_C	12832.3	12829.9	0.0349429	0.106582	0.136761	0.341565	0.264487	0.202858
6	rs406113	0	28591461	C	A	360	rs406113_C	12825.6	12827.5	0.708154	0.613834	0.841945	0.871097	0.93301	0.918145
6	rs445870	0	28602306	G	A	361	rs445870_G	12832.9	12834.8	0.761879	0.650752	0.832738	0.878185	0.967192	0.846071
6	rs13215054	0	28610773	A	C	362	rs13215054_A	12832.9	12828.5	0.0115187	0.00537501	0.0375832	0.00106676	0.0370312	0.0315183
6	rs6456825	0	28630674	G	A	363	rs6456825_G	12832.3	12834.1	0.634004	0.445498	0.406417	0.0563396	0.228048	0.296535
6	rs414745	0	28634634	C	A	364	rs414745_C	12816.3	12816.6	0.188729	0.105986	0.110634	0.00335401	0.0410736	0.0614501
6	rs418092	0	28641925	A	G	365	rs418092_A	12832.3	12832.8	0.226412	0.1313	0.14394	0.00496533	0.0554199	0.08114
6	rs450630	0	28650403	A	G	366	rs450630_A	12832.9	12834.7	0.699525	0.50198	0.45592	0.0667966	0.255223	0.333692
6	rs370520	0	28650499	A	G	367	rs370520_A	12832.9	12834.7	0.699525	0.50198	0.45592	0.0667966	0.255223	0.333692
6	rs17336532	0	28651243	A	G	368	rs17336532_A	12831.7	12824.4	0.00225527	0.000903911	0.0112406	9.73585e-05	0.00610074	0.005855
6	rs16901848	0	28654931	A	G	369	rs16901848_A	12832.9	12826.4	0.00357711	0.00138076	0.0119114	0.000115596	0.00533757	0.00871654
6	rs6901724	0	28673806	G	A	370	rs6901724_G	12832.9	12834.7	0.64781	0.127583	0.229894	0.193107	0.397495	0.447279
6	rs418914	0	28676507	G	A	371	rs418914_G	12832.3	12832.8	0.214302	0.121459	0.134097	0.00427247	0.0503027	0.0742701
6	rs442439	0	28680985	A	G	372	rs442439_A	12831.7	12832.1	0.198523	0.116712	0.134803	0.00535347	0.0494231	0.0748268
6	rs9501180	0	28687450	A	G	373	rs9501180_A	12832.9	12834.7	0.658235	0.450284	0.38927	0.0518402	0.219141	0.288574
6	rs16894171	0	28710251	A	G	374	rs16894171_A	12832.3	12833.3	0.316693	0.733008	0.708237	0.763987	0.692391	0.690479
6	rs7743296	0	28722589	T	A	375	rs7743296_T	12832.9	12832.7	0.139977	0.459043	0.339478	0.449522	0.465784	0.43499
6	rs13194504	0	28738670	A	G	376	rs13194504_A	12830.1	12807.4	6.69372e-07	2.2382e-05	0.000236809	1.3992e-07	4.00777e-05	6.83322e-05
6	rs7767008	0	28738772	C	A	377	rs7767008_C	12832.3	12834.3	0.892415	0.919114	0.764826	0.202735	0.727491	0.870727
6	rs16894191	0	28749668	G	A	378	rs16894191_G	12832.9	12832.5	0.120554	0.388099	0.280362	0.360731	0.347362	0.332429
6	rs3864294	0	28749936	G	A	379	rs3864294_G	12832.9	12834.3	0.460681	0.576895	0.571634	0.692605	0.657787	0.476253
6	rs12111360	0	28775427	A	G	380	rs12111360_A	12829.5	12831.2	0.530599	0.624192	0.754585	0.885231	0.698664	0.739184
6	rs6939576	0	28777294	A	G	381	rs6939576_A	12832.9	12832.4	0.117185	0.174586	0.152647	0.0207754	0.187441	0.240166
6	rs6908726	0	28779322	G	C	382	rs6908726_G	12832.9	12814.8	7.22473e-06	0.000178996	0.00146545	3.47273e-06	0.000274376	0.000796286
6	rs9368570	0	28784172	A	G	383	rs9368570_A	12830.1	12819.2	0.000316192	0.00184008	0.00443602	0.00827733	0.015343	0.00928908
6	rs1539584	0	28787924	C	A	384	rs1539584_C	12829	12827.5	0.0618999	0.189061	0.132748	0.247623	0.348254	0.249029
6	rs9468413	0	28797651	C	A	385	rs9468413_C	12832.3	12822.3	0.000518615	0.000252216	0.00287691	2.70058e-06	0.000234212	0.000713265
6	rs9393929	0	28804042	A	C	386	rs9393929_A	12830.1	12811.6	5.95047e-06	0.000150644	0.00126287	2.93183e-06	0.000237849	0.000692977
6	rs7755641	0	28807348	G	A	387	rs7755641_G	12831.1	12832.6	0.451188	0.359984	0.451271	0.650378	0.987926	0.899675
6	rs6456834	0	28808331	A	C	388	rs6456834_A	12832.9	12823	0.000568647	0.000286259	0.00328305	3.25015e-06	0.000277713	0.000842482
6	rs880638	0	28814891	A	G	389	rs880638_A	12830.1	12831	0.278439	0.203324	0.316588	0.0317721	0.197989	0.309531
6	rs1233579	0	28820642	G	A	390	rs1233579_G	12830.6	12807.2	4.63354e-07	1.78658e-05	0.00021219	1.18801e-07	3.41205e-05	6.35836e-05
6	rs1233585	0	28824324	G	A	391	rs1233585_G	12831.7	12818.8	0.000113165	0.000567742	0.00118199	2.82777e-05	0.00409714	0.00374143
6	rs9257136	0	28831820	C	A	392	rs9257136_C	12832.9	12809.6	4.90279e-07	1.87603e-05	0.000221217	1.31922e-07	3.68792e-05	6.89649e-05
6	rs1233599	0	28839167	C	A	393	rs1233599_C	12832.9	12809.5	4.60271e-07	1.79584e-05	0.000213202	1.27163e-07	3.58946e-05	6.76105e-05
6	rs1233604	0	28842655	A	G	394	rs1233604_A	12832.9	12809.3	4.32043e-07	1.71891e-05	0.000205471	1.21044e-07	3.43716e-05	6.46192e-05
6	rs1233615	0	28847563	A	C	395	rs1233615_A	12829.5	12831.4	0.709025	0.867618	0.910388	0.31262	0.980264	0.860459
6	rs1233619	0	28853431	A	G	396	rs1233619_A	12796.3	12771.3	2.05954e-07	9.23828e-06	0.000120369	6.45424e-08	2.09021e-05	4.05469e-05
6	rs1233621	0	28855622	G	A	397	rs1233621_G	12832.3	12834.3	0.996001	0.877314	0.837593	0.182716	0.798025	0.987348
6	rs1311918	0	28861625	A	G	398	rs1311918_A	12832.9	12808.7	3.10101e-07	1.33238e-05	0.000149321	7.76926e-08	2.4152e-05	4.58657e-05
6	rs2765222	0	28875055	A	G	399	rs2765222_A	12825.6	12827.2	0.532564	0.762851	0.970071	0.789567	0.440959	0.530883
6	rs7767099	0	28876677	A	G	400	rs7767099_A	12831.1	12807.2	3.55639e-07	1.42359e-05	0.000142343	7.11955e-08	2.28038e-05	4.36793e-05
6	rs2765220	0	28877650	G	A	401	rs2765220_G	12812.1	12800.7	0.000247462	0.00118655	0.00254412	4.02489e-05	0.00470891	0.00521432
6	rs3131343	0	28883543	A	G	402	rs3131343_A	12832.3	12808.5	3.83853e-07	1.5068e-05	0.000150927	7.90452e-08	2.48012e-05	4.74102e-05
6	rs4324798	0	28884096	A	G	403	rs4324798_A	12832.3	12807.5	2.27139e-07	8.59917e-06	9.29817e-05	3.89251e-08	1.38574e-05	2.8212e-05
6	rs209181	0	28900456	A	G	404	rs209181_A	12830.1	12807.2	6.092e-07	8.44155e-06	0.000105106	5.0904e-07	0.0001701	0.00020242
6	rs3118357	0	28910128	A	G	405	rs3118357_A	12830.6	12806.7	3.59279e-07	1.38707e-05	0.000154691	8.02659e-08	2.53446e-05	4.87268e-05
6	rs9257248	0	28911270	A	G	406	rs9257248_A	12827.4	12802.8	2.57592e-07	1.05498e-05	0.000120964	5.41249e-08	1.83832e-05	3.58594e-05
6	rs176461	0	28934384	G	A	407	rs176461_G	12832.9	12833.8	0.287737	0.206843	0.272074	0.43366	0.768373	0.667216
6	rs209165	0	28937465	C	A	408	rs209165_C	12830.1	12829.1	0.0835854	0.282494	0.272774	0.339838	0.24296	0.228416
6	rs3132389	0	28939000	C	A	409	rs3132389_C	12827.4	12805.2	9.07312e-07	3.14083e-05	0.000327478	2.18785e-07	5.98255e-05	0.000109547
6	rs3132390	0	28940767	G	A	410	rs3132390_G	12831.7	12812.8	4.66223e-06	0.000123255	0.000983834	1.92535e-06	0.00017622	0.000534546
6	rs4713182	0	28941204	A	G	411	rs4713182_A	12832.9	12829.5	0.0198537	0.0132865	0.0587997	0.0389579	0.0300881	0.0214257
6	rs3132392	0	28946608	G	A	412	rs3132392_G	12832.9	12809	3.5291e-07	1.39234e-05	0.000155416	7.80568e-08	2.50634e-05	4.87668e-05
6	rs2894065	0	28947900	A	G	413	rs2894065_A	12832.3	12828.6	0.0166611	0.0112288	0.0535151	0.0358421	0.0274588	0.0190381
6	rs1016472	0	28959346	G	A	414	rs1016472_G	12832.3	12833.4	0.349614	0.725136	0.506083	0.538848	0.454456	0.358568
6	rs3135309	0	28963784	C	A	415	rs3135309_C	12832.9	12808.1	2.25314e-07	9.04151e-06	0.000108161	4.45856e-08	1.55209e-05	3.05831e-05
6	rs209139	0	28971462	A	C	416	rs209139_A	12832.9	12834.4	0.497657	0.409068	0.496735	0.80208	0.983021	0.930296
6	rs209131	0	28975734	G	A	417	rs209131_G	12829	12829.7	0.263826	0.632187	0.446409	0.577419	0.484245	0.385249
6	rs3132377	0	28993953	G	A	418	rs3132377_G	12832.9	12833.6	0.25208	0.630787	0.441422	0.578561	0.484795	0.385074
6	rs2230683	0	28999155	G	A	419	rs2230683_G	12832.3	12808.2	3.17971e-07	1.18237e-05	0.000138519	6.15082e-08	2.02709e-05	3.95011e-05
6	rs2894066	0	29001906	A	G	420	rs2894066_A	12832.9	12830.3	0.0314656	0.0229552	0.0970201	0.00412061	0.0474853	0.0859907
6	rs3763338	0	29002290	A	G	421	rs3763338_A	12832.9	12829.4	0.0191473	0.0131097	0.0623076	0.0396026	0.0312997	0.0208989
6	rs2015436	0	29004893	G	A	422	rs2015436_G	12832.9	12833.3	0.202706	0.514603	0.325071	0.420507	0.379077	0.302921
6	rs3118361	0	29006266	A	G	423	rs3118361_A	12832.9	12810	6.2307e-07	2.27645e-05	0.00026842	1.72114e-07	4.88951e-05	8.94974e-05
6	rs1004062	0	29010112	C	A	424	rs1004062_C	12832.9	12834.5	0.519808	0.59978	0.599864	0.589673	0.700251	0.447665
6	rs6912843	0	29012141	G	A	425	rs6912843_G	12813.6	12814.6	0.318219	0.733892	0.527521	0.681363	0.585708	0.475253
6	rs3130895	0	29013770	A	G	426	rs3130895_A	12832.9	12809.2	4.10585e-07	1.47924e-05	0.000165576	8.28375e-08	2.69948e-05	5.21605e-05
6	rs3131070	0	29014510	A	T	427	rs3131070_A	12832.9	12834.4	0.491043	0.566191	0.568622	0.624937	0.663265	0.418253
6	rs4713186	0	29017444	G	A	428	rs4713186_G	12832.9	12826.3	0.00341331	0.0150002	0.0206242	0.0275133	0.0193188	0.00856827
6	rs7761745	0	29017758	A	G	429	rs7761745_A	12832.9	12825.9	0.00270145	0.00165595	0.0122389	0.00762108	0.00728996	0.00384358
6	rs2071790	0	29019781	G	A	430	rs2071790_G	12832.9	12834.4	0.499331	0.575016	0.589569	0.607923	0.666979	0.421513
6	rs2071789	0	29020055	A	G	431	rs2071789_A	12832.3	12830	0.0376357	0.0311259	0.0296534	0.0470034	0.0900991	0.0557185
6	rs2071788	0	29020286	A	G	432	rs2071788_A	12832.9	12830.4	0.0337042	0.0243048	0.0970912	0.0646551	0.0539664	0.0409957
6	rs4947339	0	29024231	A	G	433	rs4947339_A	12832.9	12820.6	0.00015641	0.00142795	0.00462894	0.00654054	0.00393324	0.00154989
6	rs9257403	0	29024951	A	G	434	rs9257403_A	12832.3	12827.1	0.0073333	0.0225789	0.0345069	0.0504014	0.0433948	0.0250533
6	rs6456876	0	29026915	G	A	435	rs6456876_G	12832.3	12820.5	0.000202172	0.00172125	0.00557624	0.00786099	0.00466496	0.00188646
6	rs3131073	0	29028951	A	G	436	rs3131073_A	12832.3	12807.9	2.79468e-07	1.13174e-05	0.000137394	5.90008e-08	2.02544e-05	3.80338e-05
6	rs4947256	0	29029919	A	C	437	rs4947256_A	12832.9	12830.9	0.0467499	0.032818	0.133361	0.0945394	0.0750154	0.0565538
6	rs1476016	0	29030698	G	A	438	rs1476016_G	12832.9	12834.6	0.570816	0.649807	0.657578	0.529	0.760094	0.500396
6	rs3130845	0	29031346	G	A	439	rs3130845_G	12832.9	12809.2	4.10585e-07	1.47924e-05	0.000165576	8.14881e-08	2.68751e-05	5.21131e-05
6	rs12386522	0	29036146	G	A	440	rs12386522_G	12832.9	12833.2	0.193116	0.141786	0.204834	0.359647	0.690208	0.58551
6	rs9257425	0	29044535	G	A	441	rs9257425_G	12830.1	12831.4	0.392596	0.812779	0.587333	0.665996	0.544441	0.42334
6	rs6933672	0	29049667	A	G	442	rs6933672_A	12832.9	12834.8	0.759141	0.210818	0.359009	0.276613	0.572045	0.608259
6	rs16894533	0	29053501	A	G	443	rs16894533_A	12832.9	12832.4	0.11295	0.376928	0.167146	0.300939	0.440348	0.366704
6	rs3135322	0	29054899	A	G	444	rs3135322_A	12832.9	12834.3	0.454967	0.518066	0.525937	0.657549	0.622355	0.387355
6	rs3130837	0	29056071	A	C	445	rs3130837_A	12832.9	12809	3.70632e-07	1.34615e-05	0.00016106	7.68006e-08	2.66426e-05	4.98823e-05
6	rs9257445	0	29057185	C	G	446	rs9257445_C	12832.9	12831.8	0.0805836	0.0758569	0.221847	0.172338	0.0655609	0.0499006
6	rs968722	0	29057883	A	G	447	rs968722_A	12832.9	12833.2	0.188869	0.213738	0.40954	0.333436	0.165097	0.154885
6	rs3130888	0	29057939	G	A	448	rs3130888_G	12832.9	12808.9	3.47581e-07	1.27595e-05	0.000160722	6.89846e-08	2.28164e-05	4.32507e-05
6	rs6904975	0	29060014	A	G	449	rs6904975_A	12832.9	12826.2	0.00318864	0.0145423	0.0204697	0.0268815	0.0185799	0.00803963
6	rs3129791	0	29062272	A	G	450	rs3129791_A	12832.9	12808.3	2.52717e-07	9.83435e-06	0.000123676	5.02536e-08	1.78597e-05	3.34844e-05
6	rs3129792	0	29064395	A	G	451	rs3129792_A	12830.6	12832	0.441881	0.49944	0.508403	0.677628	0.602006	0.370702
6	rs6934470	0	29064730	G	A	452	rs6934470_G	12832.9	12833	0.169254	0.142093	0.0944327	0.0544767	0.0981069	0.119617
6	rs9468458	0	29065562	A	G	453	rs9468458_A	12832.3	12829.5	0.0284026	0.0248358	0.0899141	0.10729	0.0822762	0.0606768
6	rs7776164	0	29066437	A	C	454	rs7776164_A	12815.2	12816.4	0.38371	0.322142	0.50482	0.484772	0.383446	0.309492
6	rs16894540	0	29069798	G	A	455	rs16894540_G	12832.9	12831.1	0.0511193	0.213738	0.0869445	0.161207	0.296197	0.192515
6	rs6456880	0	29071227	C	A	456	rs6456880_C	12832.9	12818.8	6.13572e-05	0.000622636	0.00227519	0.0033319	0.00184874	0.000679015
6	rs9468459	0	29073670	A	G	457	rs9468459_A	12832.9	12834.2	0.397597	0.287958	0.328274	0.541312	0.940578	0.83044
6	rs6920392	0	29075017	G	A	458	rs6920392_G	12832.3	12818.6	7.34414e-05	0.000679535	0.00252766	0.00371161	0.00212717	0.00077582
6	rs6906909	0	29076125	G	A	459	rs6906909_G	12832.9	12819.6	9.2217e-05	0.00082502	0.00298654	0.0044223	0.00261622	0.000970901
6	rs9257453	0	29076909	G	A	460	rs9257453_G	12832.9	12833.3	0.201882	0.155745	0.253499	0.238404	0.172592	0.136035
6	rs9295784	0	29077127	C	A	461	rs9295784_C	12832.9	12833.8	0.290918	0.209631	0.247309	0.429089	0.79896	0.682033
6	rs6456881	0	29078079	A	G	462	rs6456881_A	12829.5	12829.9	0.199978	0.226373	0.426495	0.348209	0.176922	0.164659
6	rs3129793	0	29078155	G	A	463	rs3129793_G	12832.9	12834.3	0.454919	0.522825	0.532323	0.642698	0.637305	0.401172
6	rs9257455	0	29078724	A	G	464	rs9257455_A	12832.3	12825.6	0.00310458	0.0144301	0.0200756	0.0269297	0.018763	0.00821698
6	rs6925178	0	29081194	A	C	465	rs6925178_A	12832.9	12832	0.0866714	0.0824983	0.235459	0.185741	0.073497	0.0561302
6	rs3130893	0	29088686	G	A	466	rs3130893_G	12832.9	12808.4	2.5943e-07	9.51385e-06	0.00011871	4.67305e-08	1.71496e-05	3.21404e-05
6	rs6930903	0	29089223	G	A	467	rs6930903_G	12832.9	12831.7	0.0746453	0.0690517	0.203144	0.157775	0.0597504	0.0449899
6	rs6916923	0	29092142	A	G	468	rs6916923_A	12830.1	12831.3	0.360981	0.286662	0.451571	0.436193	0.343578	0.277656
6	rs9468464	0	29092491	G	A	469	rs9468464_G	12832.9	12832.8	0.14501	0.0864273	0.0977554	0.157799	0.419628	0.365939
6	rs3129795	0	29092734	A	C	470	rs3129795_A	12832.9	12832.9	0.154163	0.257557	0.272897	0.99247	0.34638	0.17904
6	rs9380103	0	29093184	G	A	471	rs9380103_G	12832.9	12831	0.0487586	0.0319858	0.112248	0.0790036	0.0619967	0.043811
6	rs6941946	0	29096562	G	A	472	rs6941946_G	12831.7	12818.4	8.93865e-05	0.00104779	0.00375503	0.00646295	0.00395731	0.00154759
6	rs2394513	0	29100487	A	G	473	rs2394513_A	12819.1	12819.7	0.242577	0.249617	0.407225	0.461106	0.366166	0.29053
6	rs7741520	0	29102549	G	A	474	rs7741520_G	12832.9	12831.9	0.0865149	0.095924	0.269443	0.237753	0.0995882	0.0759521
6	rs10484544	0	29103698	G	A	475	rs10484544_G	12832.9	12831.1	0.0512018	0.218984	0.0872687	0.16065	0.29408	0.193567
6	rs4713197	0	29105564	C	A	476	rs4713197_C	12832.9	12830.2	0.0308971	0.0251002	0.0982314	0.112598	0.0868558	0.0646566
6	rs16894557	0	29107805	A	G	477	rs16894557_A	12830.1	12826.7	0.0199041	0.0193399	0.00905924	0.0173441	0.0928173	0.0591357
6	rs7755402	0	29110041	G	A	478	rs7755402_G	12832.9	12831.1	0.0512018	0.218984	0.0872687	0.16065	0.29408	0.193567
6	rs9468471	0	29112070	A	G	479	rs9468471_A	12832.3	12831.3	0.0821735	0.0913027	0.259918	0.228935	0.0946031	0.0722375
6	rs9468473	0	29114229	A	G	480	rs9468473_A	12832.3	12831.3	0.0838709	0.0936287	0.264672	0.232443	0.0968344	0.0737077
6	rs7743837	0	29114823	G	A	481	rs7743837_G	12832.9	12826.6	0.00398245	0.00601681	0.0575376	0.0499642	0.0138699	0.00997852
6	rs6919044	0	29117547	G	A	482	rs6919044_G	12826.8	12825.8	0.0826684	0.0919418	0.261427	0.228901	0.0948717	0.0721588
6	rs12333226	0	29117922	A	T	483	rs12333226_A	12832.9	12833.2	0.197288	0.14097	0.185084	0.327848	0.647499	0.553649
6	rs6456889	0	29118803	G	A	484	rs6456889_G	12832.9	12831.9	0.0847755	0.0944153	0.266341	0.234185	0.097581	0.0743208
6	rs2050230	0	29119906	A	G	485	rs2050230_A	12782.7	12783.9	0.366539	0.469466	0.484476	0.63852	0.645782	0.388243
6	rs2143574	0	29122005	A	G	486	rs2143574_A	12832.3	12818	5.38108e-05	0.000711395	0.00268473	0.00476461	0.00286671	0.00105442
6	rs3130756	0	29125080	G	A	487	rs3130756_G	12832.3	12833.7	0.434814	0.54127	0.563329	0.568717	0.716017	0.456746
6	rs9348819	0	29127211	A	G	488	rs9348819_A	12832.9	12831.8	0.0774726	0.0518128	0.173846	0.118381	0.0921569	0.0676118
6	rs7747023	0	29133659	G	A	489	rs7747023_G	12832.3	12832.8	0.222787	0.239265	0.449333	0.365164	0.186442	0.172175
6	rs3117143	0	29139121	A	C	490	rs3117143_A	12832.9	12808.4	2.68764e-07	1.07143e-05	0.000124873	5.15562e-08	2.04829e-05	3.83659e-05
6	rs12665818	0	29140163	T	A	491	rs12665818_T	12832.9	12830.6	0.0388159	0.180502	0.0687054	0.130964	0.247097	0.15734
6	rs6918175	0	29147209	C	A	492	rs6918175_C	12832.9	12830.7	0.0400911	0.182727	0.0712673	0.134396	0.251493	0.161147
6	rs6456895	0	29147874	A	G	493	rs6456895_A	12832.9	12818.8	6.13208e-05	0.000793128	0.00295481	0.00515196	0.00309639	0.00114895
6	rs3131083	0	29147956	G	A	494	rs3131083_G	12832.9	12834.3	0.44854	0.559283	0.577442	0.557844	0.72826	0.470055
6	rs6456897	0	29149262	G	A	495	rs6456897_G	12832.9	12833.1	0.183476	0.152638	0.101604	0.0588192	0.105847	0.126161
6	rs9348821	0	29155182	G	A	496	rs9348821_G	12832.9	12833.5	0.233093	0.249684	0.45428	0.37006	0.188582	0.173908
6	rs11758255	0	29158693	G	A	497	rs11758255_G	12832.9	12831.9	0.086436	0.0958589	0.269355	0.236243	0.0985163	0.0748883
6	rs6903771	0	29160551	A	G	498	rs6903771_A	12832.3	12832.9	0.237723	0.260819	0.474115	0.38863	0.203452	0.18693
6	rs3129788	0	29165618	A	G	499	rs3129788_A	12832.3	12807.7	2.51396e-07	1.04242e-05	0.000121812	5.13553e-08	1.98808e-05	3.84862e-05
6	rs9380109	0	29165950	G	A	500	rs9380109_G	12832.9	12818.6	5.51856e-05	0.000747023	0.00280574	0.0049681	0.00296255	0.0010978
6	rs2142905	0	29172751	G	A	501	rs2142905_G	12832.9	12824	0.000994575	0.0125385	0.00895502	0.0214206	0.0459954	0.0254383
6	rs4713201	0	29175242	G	A	502	rs4713201_G	12832.9	12831.1	0.0518572	0.0320437	0.109523	0.0785376	0.0603617	0.0430371
6	rs3129111	0	29175751	A	G	503	rs3129111_A	12832.9	12833.6	0.261083	0.270034	0.451752	0.506332	0.405342	0.325326
6	rs3131091	0	29181073	G	A	504	rs3131091_G	12832.9	12834.3	0.462162	0.573682	0.592608	0.54193	0.748463	0.486085
6	rs6456908	0	29183051	A	G	505	rs6456908_A	12832.3	12831.4	0.0887519	0.0986639	0.276096	0.241791	0.101328	0.0770548
6	rs3749977	0	29188323	A	G	506	rs3749977_A	12832.9	12831.9	0.0831408	0.0938054	0.268897	0.237136	0.0990118	0.0752918
6	rs3129106	0	29189140	C	A	507	rs3129106_C	12832.9	12828.7	0.0131013	0.054384	0.0667783	0.498504	0.16423	0.0443839
6	rs3130766	0	29194808	G	A	508	rs3130766_G	12832.9	12834.3	0.443779	0.552936	0.572606	0.558907	0.725385	0.466759
6	rs2064162	0	29196794	G	A	509	rs2064162_G	12807.6	12793.7	6.48746e-05	0.000848617	0.00312277	0.00560343	0.00339187	0.0012672
6	rs3130772	0	29200558	G	C	510	rs3130772_G	12781.2	12768	9.93131e-05	0.00125389	0.0046305	0.00795803	0.00506402	0.00202274
6	rs3130773	0	29203887	A	G	511	rs3130773_A	12832.9	12809.8	5.38887e-07	1.96043e-05	0.000216852	1.14144e-07	3.88021e-05	7.38514e-05
6	rs3130778	0	29207558	A	G	512	rs3130778_A	12832.3	12819.2	0.000101566	0.00128773	0.00442335	0.00811886	0.00526657	0.00202084
6	rs2267632	0	29214447	A	G	513	rs2267632_A	12832.9	12834.8	0.841463	0.878741	0.884788	0.814831	0.938372	0.877583
6	rs9468487	0	29215031	G	A	514	rs9468487_G	12832.9	12833.2	0.198904	0.124308	0.149899	0.231564	0.556593	0.507089
6	rs9393945	0	29216270	C	G	515	rs9393945_C	12832.9	12831.1	0.0522484	0.0321034	0.115145	0.0836619	0.0649104	0.0461556
6	rs9368592	0	29221576	A	C	516	rs9368592_A	12819.1	12817.3	0.0510934	0.0315141	0.114139	0.0821406	0.0636804	0.0452876
6	rs3116846	0	29222595	A	G	517	rs3116846_A	12832.9	12834.4	0.480817	0.602559	0.633195	0.501422	0.79869	0.526499
6	rs3130724	0	29226509	A	C	518	rs3130724_A	12832.9	12831.6	0.0702909	0.234513	0.230758	0.0156466	0.149632	0.213749
6	rs3116847	0	29226792	G	A	519	rs3116847_G	12830.1	12828.5	0.0584492	0.227216	0.0941008	0.16696	0.320648	0.212106
6	rs3129123	0	29227138	A	G	520	rs3129123_A	12832.9	12832.8	0.150193	0.171017	0.198165	0.985933	0.500383	0.272321
6	rs3129126	0	29229610	A	G	521	rs3129126_A	12827.4	12828.7	0.413061	0.524078	0.548408	0.581437	0.705639	0.449944
6	rs3129131	0	29233381	G	A	522	rs3129131_G	12832.9	12833.1	0.182047	0.21887	0.268856	0.837855	0.612691	0.343597
6	rs3130737	0	29243187	A	G	523	rs3130737_A	12831.1	12831	0.143207	0.162744	0.190935	0.973371	0.492277	0.267403
6	rs3130738	0	29244089	A	G	524	rs3130738_A	12817.3	12817	0.129851	0.149379	0.172236	0.926681	0.453643	0.238137
6	rs2394520	0	29245199	G	A	525	rs2394520_G	12832.9	12823.5	0.000738235	0.00718918	0.00906629	0.0223118	0.0371558	0.0173376
6	rs3129151	0	29246294	A	G	526	rs3129151_A	12832.9	12831.5	0.0675306	0.227322	0.224016	0.0148354	0.143753	0.20583
6	rs3129152	0	29246756	C	A	527	rs3129152_C	12828.4	12826.4	0.0460533	0.153988	0.139172	0.00614523	0.0864651	0.133076
6	rs3129154	0	29247765	G	A	528	rs3129154_G	12828.4	12828.8	0.202744	0.240092	0.293032	0.791954	0.654192	0.37639
6	rs2206042	0	29250455	C	A	529	rs2206042_C	12832.3	12832.6	0.189514	0.226526	0.274588	0.822976	0.62509	0.35403
6	rs3130745	0	29256598	A	C	530	rs3130745_A	12832.9	12832.8	0.150336	0.168894	0.195473	0.987554	0.500941	0.274001
6	rs2006752	0	29259291	A	G	531	rs2006752_A	12791.2	12790.9	0.123146	0.141681	0.162492	0.895	0.428544	0.223598
6	rs3116820	0	29259650	G	A	532	rs3116820_G	12822.9	12822.8	0.153682	0.172175	0.201283	0.99746	0.509963	0.278765
6	rs9257593	0	29260773	A	G	533	rs9257593_A	12832.9	12834.8	0.739161	0.73528	0.606996	0.449574	0.893859	0.772235
6	rs3116826	0	29269414	A	G	534	rs3116826_A	12832.9	12832.9	0.154687	0.172769	0.20108	0.998507	0.512339	0.282232
6	rs3116830	0	29275554	A	G	535	rs3116830_A	12832.9	12810.3	7.28205e-07	2.46349e-05	0.000266044	1.41589e-07	4.63867e-05	8.64885e-05
6	rs760804	0	29279018	A	G	536	rs760804_A	12832.9	12831.6	0.07167	0.235431	0.231689	0.0151443	0.145464	0.207464
6	rs10452602	0	29281066	A	G	537	rs10452602_A	12830.1	12829.1	0.0840863	0.0662723	0.0606164	0.0303786	0.113107	0.0290826
6	rs3116832	0	29287124	G	C	538	rs3116832_G	12832.9	12831	0.0495506	0.197419	0.0771254	0.139985	0.271401	0.176186
6	rs9257616	0	29288700	A	G	539	rs9257616_A	12814	12814.5	0.220001	0.293753	0.295061	0.824583	0.399232	0.23354
6	rs2894083	0	29290287	G	A	540	rs2894083_G	12832.9	12834.7	0.659555	0.660275	0.538588	0.506643	0.972528	0.701273
6	rs3129096	0	29291325	G	A	541	rs3129096_G	12831.1	12833	0.685498	0.68764	0.562387	0.48647	0.948	0.723447
6	rs3129098	0	29293266	G	A	542	rs3129098_G	12832.9	12834.7	0.659393	0.657281	0.533028	0.513259	0.986992	0.6837
6	rs3130803	0	29297134	A	G	543	rs3130803_A	12832.9	12832.5	0.121753	0.140121	0.166515	0.915149	0.4416	0.235921
6	rs6904165	0	29299368	A	G	544	rs6904165_A	12831.7	12832.8	0.345898	0.368758	0.578057	0.634403	0.515169	0.427702
6	rs714470	0	29299390	C	A	545	rs714470_C	12694.3	12696	0.603979	0.57854	0.459093	0.592421	0.908745	0.592069
6	rs12660419	0	29299527	A	G	546	rs12660419_A	12829.5	12826.4	0.0236118	0.0226568	0.0118701	0.0219951	0.11138	0.0736349
6	rs3130812	0	29301764	A	G	547	rs3130812_A	12832.9	12834.5	0.556822	0.566669	0.452224	0.610949	0.911722	0.59407
6	rs11962388	0	29301838	G	A	548	rs11962388_G	12832.9	12832.9	0.156348	0.110408	0.12715	0.0744247	0.135713	0.161667
6	rs11964645	0	29301968	G	A	549	rs11964645_G	12832.9	12833.3	0.204181	0.105161	0.0714422	0.0413593	0.0900654	0.121356
6	rs3130813	0	29302990	G	A	550	rs3130813_G	12832.9	12834.6	0.621676	0.611439	0.49862	0.555431	0.964668	0.644785
6	rs3130814	0	29304160	C	A	551	rs3130814_C	12832.9	12834.5	0.529785	0.578041	0.347196	0.674443	0.835942	0.593361
6	rs2207338	0	29307803	C	A	552	rs2207338_C	12832.9	12834.8	0.79727	0.817231	0.901426	0.257598	0.563553	0.820713
6	rs3129105	0	29321049	C	A	553	rs3129105_C	12832.9	12834.1	0.370216	0.480795	0.497871	0.626407	0.681981	0.433929
6	rs3117330	0	29333774	A	G	554	rs3117330_A	12831.1	12833.1	0.801731	0.821428	0.897404	0.258792	0.564914	0.821675
6	rs3117329	0	29335622	G	A	555	rs3117329_G	12830	12832	0.927563	0.877412	0.912232	0.320994	0.869179	0.854138
6	rs3130827	0	29338662	A	G	556	rs3130827_A	12832.9	12834.8	0.791216	0.812389	0.906146	0.254405	0.557026	0.813078
6	rs16894681	0	29340051	C	A	557	rs16894681_C	12832.3	12833.8	0.479039	0.496353	0.516081	0.72539	0.945715	0.851933
6	rs10484545	0	29342489	C	G	558	rs10484545_C	12832.9	12833.8	0.30448	0.335344	0.547796	0.611514	0.482689	0.394783
6	rs6904130	0	29343172	G	A	559	rs6904130_G	12832.9	12833.5	0.237793	0.275514	0.457293	0.512804	0.409642	0.332583
6	rs3130829	0	29343879	A	G	560	rs3130829_A	12823.4	12825	0.48898	0.602239	0.622652	0.497706	0.798793	0.528277
6	rs7766902	0	29344624	A	C	561	rs7766902_A	12832.9	12830.2	0.0309284	0.0241132	0.0871964	0.0957641	0.0872994	0.065668
6	rs3130830	0	29344701	G	A	562	rs3130830_G	12832.9	12834.9	0.92072	0.866839	0.92212	0.313369	0.860068	0.865553
6	rs6942318	0	29345994	A	G	563	rs6942318_A	12829.5	12830.1	0.236268	0.273845	0.454863	0.510527	0.40777	0.331091
6	rs9257660	0	29348258	A	G	564	rs9257660_A	12830.1	12829.6	0.113928	0.388668	0.175556	0.32248	0.465046	0.398712
6	rs3117326	0	29348357	A	G	565	rs3117326_A	12832.9	12810.8	9.1189e-07	2.81917e-05	0.000284873	1.48047e-07	4.86593e-05	9.19808e-05
6	rs3130834	0	29356128	G	A	566	rs3130834_G	12832.3	12810.2	8.99307e-07	2.78875e-05	0.000282307	1.46705e-07	4.81948e-05	9.09652e-05
6	rs9468508	0	29361735	A	G	567	rs9468508_A	12832.9	12833.7	0.281557	0.229674	0.308926	0.515634	0.88506	0.769278
6	rs6901923	0	29361866	A	G	568	rs6901923_A	12832.3	12832.3	0.15828	0.088366	0.064928	0.0358745	0.0734462	0.104165
6	rs1884123	0	29364399	A	G	569	rs1884123_A	12831.7	12833.7	0.859673	0.833545	0.913837	0.250173	0.493417	0.777316
6	rs1123283	0	29366842	A	T	570	rs1123283_A	12831.1	12832	0.29032	0.366156	0.391987	0.790166	0.599556	0.360107
6	rs4446587	0	29367602	G	A	571	rs4446587_G	12832.9	12834.1	0.387847	0.506974	0.556503	0.557652	0.794616	0.501758
6	rs3117425	0	29368410	A	G	572	rs3117425_A	12830	12810.2	3.12259e-06	6.74046e-05	0.000525693	3.60389e-07	0.000113177	0.000200563
6	rs3117439	0	29374462	A	G	573	rs3117439_A	12832.9	12813.2	3.24527e-06	7.63786e-05	0.000576518	4.45396e-07	0.000126014	0.000219133
6	rs16867628	0	29374476	A	G	574	rs16867628_A	12832.3	12828.3	0.0143085	0.016926	0.00933167	0.0184699	0.108743	0.0736754
6	rs9257691	0	29376908	C	A	575	rs9257691_C	12832.9	12834.9	0.978883	0.945788	0.866315	0.345062	0.842972	0.845803
6	rs4594993	0	29378477	G	A	576	rs4594993_G	12832.9	12831.8	0.0804305	0.100434	0.158184	0.256297	0.220093	0.184232
6	rs9348826	0	29378774	G	C	577	rs9348826_G	12832.9	12832.5	0.119926	0.0733579	0.221558	0.162885	0.171064	0.106815
6	rs3117426	0	29379991	A	G	578	rs3117426_A	12832.9	12829	0.0151925	0.0839412	0.0786808	0.00381308	0.0534584	0.100817
6	rs16894709	0	29380280	A	G	579	rs16894709_A	12832.9	12831.3	0.0573663	0.0707841	0.112296	0.189643	0.16202	0.133871
6	rs3117427	0	29382115	G	A	580	rs3117427_G	12832.9	12814.3	5.78817e-06	0.00012183	0.000752583	6.173e-07	0.000143355	0.000237287
6	rs9257693	0	29382327	G	A	581	rs9257693_G	12832.9	12834.8	0.827001	0.907337	0.76305	0.421808	0.932771	0.757489
6	rs7774255	0	29382335	A	T	582	rs7774255_A	12832.9	12834.8	0.781869	0.901753	0.76563	0.407321	0.912459	0.76136
6	rs9257694	0	29382465	A	G	583	rs9257694_A	12832.9	12834.3	0.444145	0.550652	0.623081	0.505761	0.855004	0.627373
6	rs17404424	0	29383277	A	G	584	rs17404424_A	12832.9	12834.2	0.42229	0.229664	0.243887	0.028114	0.399215	0.884623
6	rs9257696	0	29383486	G	A	585	rs9257696_G	12832.9	12826	0.00291203	0.00188458	0.0447081	0.0219529	0.0230794	0.00787526
6	rs9257710	0	29390965	G	A	586	rs9257710_G	12832.9	12834.6	0.584908	0.375591	0.451255	0.289073	0.269566	0.269585
6	rs9257711	0	29391422	A	G	587	rs9257711_A	12829	12816.5	0.000141293	0.000132372	0.00412838	0.00249382	0.00163428	0.00184188
6	rs3129683	0	29394649	G	C	588	rs3129683_G	12832.9	12813.2	3.1734e-06	3.70688e-05	0.000395213	2.39092e-06	0.00072533	0.000777863
6	rs16894722	0	29400009	G	A	589	rs16894722_G	12832.9	12834.8	0.837703	0.756655	0.695536	0.945991	0.917529	0.991359
6	rs12660111	0	29404127	A	G	590	rs12660111_A	12830.1	12820.5	0.000658076	0.000940858	0.000766137	0.00195008	0.0116578	0.00768361
6	rs9357078	0	29405645	A	G	591	rs9357078_A	12831.7	12831.9	0.178027	0.128019	0.430342	0.299318	0.301928	0.202401
6	rs9257731	0	29407350	A	G	592	rs9257731_A	12832.9	12834.6	0.584908	0.375591	0.451255	0.289073	0.269566	0.269585
6	rs6930435	0	29409201	A	G	593	rs6930435_A	12832.3	12816.8	2.83799e-05	1.24572e-05	0.000277212	1.00457e-06	0.000444012	0.000495812
6	rs6903989	0	29410009	A	C	594	rs6903989_A	12832.9	12817.9	3.70757e-05	1.49368e-05	0.000309496	1.03702e-06	0.000455635	0.000459774
6	rs9257745	0	29414635	A	G	595	rs9257745_A	12832.9	12826.2	0.003162	0.00214199	0.0482226	0.0237939	0.0244163	0.00892958
6	rs9257749	0	29418620	C	A	596	rs9257749_C	12832.9	12834.6	0.603993	0.390819	0.454107	0.296791	0.272751	0.279889
6	rs1014258	0	29418660	A	G	597	rs1014258_A	12832.9	12817.2	2.5797e-05	1.15096e-05	0.000259864	9.33097e-07	0.000419759	0.000466901
6	rs10447393	0	29424831	A	G	598	rs10447393_A	12832.9	12832.4	0.112281	0.0985893	0.0758242	0.00752933	0.15242	0.253607
6	rs9257768	0	29430065	A	G	599	rs9257768_A	12832.9	12834.6	0.584908	0.375591	0.451255	0.289073	0.269566	0.269585
6	rs3117438	0	29431238	G	A	600	rs3117438_G	12832.9	12834.8	0.762124	0.268154	0.607589	0.280996	0.450302	0.463352
6	rs7761746	0	29431634	A	G	601	rs7761746_A	12832.9	12834.8	0.737666	0.80349	0.911596	0.910789	0.930877	0.650984
6	rs9257770	0	29431817	C	A	602	rs9257770_C	12832.9	12820.7	0.00016858	0.000158007	0.0048258	0.00289448	0.00190899	0.00213473
6	rs6930033	0	29431884	C	A	603	rs6930033_C	12832.9	12823.9	0.000894258	0.00130612	0.00106293	0.00263586	0.014886	0.0101597
6	rs4713210	0	29433412	A	G	604	rs4713210_A	12832.9	12833.1	0.17915	0.132173	0.434231	0.302769	0.305399	0.208696
6	rs9257775	0	29435058	G	A	605	rs9257775_G	12832.3	12834.2	0.709827	0.612641	0.791269	0.172273	0.593804	0.789528
6	rs9257792	0	29442418	G	A	606	rs9257792_G	12832.9	12822.4	0.000416707	0.000477302	0.00823049	0.00572635	0.00637719	0.00222061
6	rs9257793	0	29443133	G	A	607	rs9257793_G	12832.9	12817.7	3.41052e-05	0.000404414	0.00220502	3.94658e-06	0.000435891	0.00140803
6	rs16894773	0	29443461	A	G	608	rs16894773_A	12832.9	12834.4	0.465304	0.541047	0.585549	0.767693	0.715617	0.87136
6	rs9380120	0	29443516	G	A	609	rs9380120_G	12832.9	12832.9	0.161971	0.115723	0.396118	0.279935	0.281166	0.188642
6	rs9257794	0	29443640	A	G	610	rs9257794_A	12830.1	12827.5	0.0320911	0.0781372	0.257986	0.030121	0.156017	0.181413
6	rs6934993	0	29445479	G	A	611	rs6934993_G	12832.9	12830	0.027799	0.0684324	0.233993	0.0262781	0.141539	0.16496
6	rs4713213	0	29446941	G	A	612	rs4713213_G	12832.3	12834.2	0.780067	0.650474	0.713621	0.185778	0.531031	0.765125
6	rs9257799	0	29447250	G	A	613	rs9257799_G	12832.9	12826.5	0.00380055	0.00313159	0.069832	0.0462543	0.0457062	0.0261596
6	rs10807053	0	29448564	C	G	614	rs10807053_C	12832.9	12834.7	0.627427	0.482768	0.506233	0.0951138	0.349277	0.568824
6	rs9257800	0	29448722	A	G	615	rs9257800_A	12829.5	12807.1	7.72266e-07	2.75927e-05	0.000273048	1.10625e-07	4.65744e-05	8.35583e-05
6	rs7772982	0	29448986	G	A	616	rs7772982_G	12832.3	12821.1	0.000272313	0.00028691	0.0109519	0.0133776	0.0098758	0.0044432
6	rs7753474	0	29449287	A	G	617	rs7753474_A	12832.9	12821.5	0.000258171	0.000273443	0.0103847	0.0126028	0.00928103	0.00415223
6	rs7774029	0	29449602	G	A	618	rs7774029_G	12831.7	12828.5	0.022582	0.0230836	0.0299116	0.0562974	0.0485595	0.045376
6	rs9380122	0	29450215	G	A	619	rs9380122_G	12832.3	12833.6	0.39505	0.459235	0.499169	0.678638	0.634897	0.774912
6	rs3749971	0	29450754	A	G	620	rs3749971_A	12832.3	12812.6	3.23107e-06	8.55596e-05	0.000592191	3.68992e-07	0.000120962	0.000214647
6	rs5003264	0	29451968	A	C	621	rs5003264_A	12832.9	12834.5	0.524494	0.63527	0.635727	0.532247	0.906355	0.617872
6	rs238883	0	29454205	G	A	622	rs238883_G	12832.9	12831.6	0.0704211	0.243985	0.214682	0.179134	0.206375	0.157764
6	rs9257805	0	29454308	G	A	623	rs9257805_G	12832.9	12815.5	1.08861e-05	0.000188468	0.000822032	8.23019e-07	0.000123551	0.000445578
6	rs238881	0	29454968	G	A	624	rs238881_G	12832.9	12834.8	0.843756	0.721638	0.940175	0.258279	0.673304	0.967601
6	rs238880	0	29455023	A	G	625	rs238880_A	12824	12825.6	0.49382	0.624078	0.628002	0.550802	0.877947	0.592223
6	rs3129688	0	29456276	G	A	626	rs3129688_G	12832.9	12834.8	0.80697	0.10481	0.335336	0.116096	0.136871	0.140783
6	rs3117442	0	29457070	G	A	627	rs3117442_G	12832.9	12834.8	0.820458	0.694357	0.90832	0.242208	0.64236	0.935304
6	rs238876	0	29457588	A	G	628	rs238876_A	12832.3	12833.8	0.462743	0.587104	0.582621	0.591379	0.834908	0.561195
6	rs1419640	0	29458833	C	A	629	rs1419640_C	12832.9	12834.8	0.843915	0.747757	0.960891	0.260001	0.68194	0.903
6	rs238873	0	29459620	G	A	630	rs238873_G	12832.9	12820	0.000111459	0.000175895	0.00812324	0.0123711	0.00805303	0.00933243
6	rs238872	0	29459852	G	A	631	rs238872_G	12832.9	12834.4	0.483824	0.586133	0.520478	0.573329	0.848216	0.638918
6	rs3117444	0	29460922	A	G	632	rs3117444_A	12832.9	12834.3	0.440093	0.559057	0.492007	0.614896	0.809582	0.603724
6	rs3129681	0	29462362	G	A	633	rs3129681_G	12832.9	12834.3	0.454179	0.575601	0.506621	0.601276	0.821991	0.614637
6	rs3094552	0	29462600	A	G	634	rs3094552_A	12832.9	12834.3	0.454022	0.573221	0.507159	0.601168	0.824598	0.618911
6	rs3094551	0	29462778	A	G	635	rs3094551_A	12832.9	12833.1	0.180628	0.217585	0.226965	0.857348	0.737767	0.498086
6	rs3094550	0	29462788	C	A	636	rs3094550_C	12832.3	12832.3	0.154504	0.185539	0.19434	0.923609	0.676082	0.448826
6	rs238869	0	29463092	G	A	637	rs238869_G	12832.9	12834.8	0.763516	0.591924	0.876452	0.248322	0.609758	0.746876
6	rs3094549	0	29463127	C	A	638	rs3094549_C	12826.8	12807.7	4.30578e-06	5.74424e-05	0.00021343	0.000421668	0.00305833	0.00086863
6	rs3094548	0	29463181	G	C	639	rs3094548_G	12827.4	12829.3	0.891742	0.664784	0.99885	0.181912	0.743928	0.901772
6	rs11966698	0	29463217	A	G	640	rs11966698_A	12832.9	12834.7	0.668688	0.56894	0.464892	0.32543	0.500488	0.639168
6	rs1419639	0	29463473	C	A	641	rs1419639_C	12832.3	12824.5	0.00174227	0.00408994	0.0109008	0.0106571	0.00751678	0.00594922
6	rs1419638	0	29463498	A	G	642	rs1419638_A	12832.9	12826	0.00286359	0.00981866	0.00754879	0.137512	0.0775617	0.02879
6	rs1419637	0	29463537	T	A	643	rs1419637_T	12832.9	12830.7	0.0418414	0.118174	0.0691294	0.606042	0.351286	0.199652
6	rs1419635	0	29463897	G	A	644	rs1419635_G	12821.3	12820.6	0.100076	0.271411	0.279999	0.895674	0.477699	0.287971
6	rs4711185	0	29464025	A	G	645	rs4711185_A	12829.4	12829.7	0.196346	0.511386	0.268149	0.879836	0.479695	0.383934
6	rs9380123	0	29464097	A	G	646	rs9380123_A	12830.1	12828.7	0.0660109	0.19533	0.208615	0.959807	0.373607	0.212983
6	rs9257809	0	29464310	G	A	647	rs9257809_G	12832.9	12808.6	2.93663e-07	1.82117e-05	0.000168804	4.35735e-08	2.62701e-05	4.62588e-05
6	rs379157	0	29464566	G	A	648	rs379157_G	12832.3	12834.3	0.985728	0.917646	0.790514	0.135627	0.341122	0.494212
6	rs442694	0	29464666	A	C	649	rs442694_A	12832.9	12810.4	7.31848e-07	3.759e-05	0.000353789	1.35103e-07	6.25223e-05	0.000110812
6	rs9257812	0	29465000	A	G	650	rs9257812_A	12829.5	12828.2	0.0660356	0.195026	0.11008	0.853849	0.461263	0.323649
6	rs9393956	0	29465624	G	A	651	rs9393956_G	12832.9	12827.3	0.00586564	0.00969917	0.0162836	0.0148324	0.01379	0.0139175
6	rs1592404	0	29466655	C	G	652	rs1592404_C	12832.9	12832	0.091273	0.255746	0.270938	0.920161	0.458785	0.272805
6	rs9257819	0	29468162	C	A	653	rs9257819_C	12832.9	12831.6	0.0688384	0.205314	0.116886	0.878547	0.477659	0.338605
6	rs9257820	0	29468248	A	C	654	rs9257820_A	12832.9	12831.4	0.0606689	0.183672	0.101595	0.81878	0.430102	0.312605
6	rs3128850	0	29469012	G	A	655	rs3128850_G	12832.9	12834.9	0.95445	0.152238	0.439839	0.162124	0.16877	0.169273
6	rs2022077	0	29469103	T	A	656	rs2022077_T	12832.3	12830.9	0.0666874	0.20032	0.113378	0.867883	0.470013	0.332763
6	rs16894836	0	29469686	C	A	657	rs16894836_C	12832.3	12834	0.559679	0.65208	0.74637	0.905713	0.686993	0.599461
6	rs9257823	0	29469714	A	G	658	rs9257823_A	12823.4	12822	0.0618674	0.188038	0.103948	0.840943	0.453549	0.319631
6	rs7753592	0	29470047	T	A	659	rs7753592_T	12832.9	12833.8	0.295701	0.189865	0.111816	0.0678588	0.144389	0.183023
6	rs9257825	0	29470675	G	A	660	rs9257825_G	12811.3	12809.9	0.0668087	0.199264	0.111475	0.866424	0.469974	0.333092
6	rs9257828	0	29471676	A	G	661	rs9257828_A	12829.5	12827.1	0.0356818	0.110715	0.0510588	0.55836	0.281047	0.201937
6	rs4713217	0	29472304	G	A	662	rs4713217_G	12832.9	12831.4	0.0620268	0.188832	0.104235	0.83588	0.447147	0.314033
6	rs9257834	0	29472594	A	C	663	rs9257834_A	12832.9	12831.3	0.0599291	0.184863	0.103095	0.831884	0.442889	0.310816
6	rs2073154	0	29472794	G	C	664	rs2073154_G	12822.7	12821.1	0.0580934	0.182169	0.0998123	0.823216	0.438004	0.306784
6	rs2073151	0	29472930	A	G	665	rs2073151_A	12832.3	12830.8	0.0610952	0.188453	0.105244	0.842901	0.450748	0.317087
6	rs2073149	0	29473402	T	A	666	rs2073149_T	12831.7	12832.8	0.33825	0.588457	0.230265	0.871111	0.781515	0.612881
6	rs7770882	0	29473624	A	G	667	rs7770882_A	12832.3	12833.4	0.333959	0.578036	0.224745	0.881636	0.770898	0.605093
6	rs4713218	0	29473953	A	G	668	rs4713218_A	12832.3	12831	0.0678239	0.20218	0.114525	0.870514	0.472114	0.334663
6	rs1028411	0	29475378	C	A	669	rs1028411_C	12832.9	12831.5	0.0665018	0.199727	0.113003	0.865283	0.467859	0.331003
6	rs4713220	0	29475477	A	T	670	rs4713220_A	12829.5	12828	0.0582829	0.17775	0.0976002	0.802001	0.419954	0.304637
6	rs9257837	0	29476000	A	G	671	rs9257837_A	12832.9	12834.6	0.567004	0.627196	0.366905	0.664646	0.875344	0.936937
6	rs9257843	0	29476644	G	A	672	rs9257843_G	12832.9	12833.9	0.318615	0.557911	0.211479	0.911283	0.746932	0.586661
6	rs9405124	0	29476792	G	A	673	rs9405124_G	12830.6	12829.5	0.0799494	0.229816	0.242736	0.96942	0.422644	0.248671
6	rs2394604	0	29477247	A	C	674	rs2394604_A	12832.9	12834.8	0.713386	0.774569	0.465343	0.784385	0.999879	0.93132
6	rs2394607	0	29477498	G	A	675	rs2394607_G	12832.3	12829.8	0.0346252	0.107161	0.0488815	0.546011	0.273445	0.196731
6	rs1419634	0	29477651	A	C	676	rs1419634_A	12829.5	12827.8	0.0542733	0.166718	0.0906878	0.771431	0.39915	0.288185
6	rs1362061	0	29479144	G	C	677	rs1362061_G	12832.9	12832	0.0880924	0.24727	0.260833	0.939364	0.443979	0.265034
6	rs429479	0	29480302	G	A	678	rs429479_G	12827.7	12801	8.46667e-08	7.24495e-06	7.52136e-05	1.34944e-08	8.45657e-06	1.5603e-05
6	rs2394608	0	29480408	G	A	679	rs2394608_G	12832.9	12834.7	0.661473	0.997648	0.771672	0.374268	0.91594	0.790143
6	rs1419632	0	29481228	C	A	680	rs1419632_C	12832.9	12833.9	0.310986	0.553211	0.223643	0.888344	0.759678	0.596409
6	rs406511	0	29484364	C	G	681	rs406511_C	12829	12802.9	1.19811e-07	9.54537e-06	9.56906e-05	1.89757e-08	1.09034e-05	2.01075e-05
6	rs12192194	0	29487870	G	A	682	rs12192194_G	12832.9	12834.5	0.538369	0.817475	0.556818	0.599108	0.858762	0.633917
6	rs1544403	0	29489885	G	A	683	rs1544403_G	12832.9	12827.8	0.00759739	0.0117404	0.0190899	0.0168341	0.0158536	0.0163992
6	rs720497	0	29490412	C	G	684	rs720497_C	12734.4	12733.6	0.0994143	0.144746	0.350879	0.0621842	0.402205	0.482381
6	rs1362073	0	29491299	A	G	685	rs1362073_A	12832.9	12834.4	0.505565	0.778127	0.526057	0.630273	0.828427	0.606571
6	rs16894861	0	29491373	A	G	686	rs16894861_A	12832.9	12834.3	0.438368	0.494675	0.658875	0.738804	0.75997	0.57349
6	rs10807055	0	29492110	G	A	687	rs10807055_G	12832.9	12834.5	0.538283	0.817466	0.556738	0.600774	0.85776	0.632031
6	rs3131024	0	29493216	A	G	688	rs3131024_A	12832.3	12830.5	0.0516035	0.299907	0.181558	0.519336	0.932668	0.888505
6	rs1011985	0	29493751	G	C	689	rs1011985_G	12832.9	12824.3	0.00111281	0.0174281	0.0106963	0.0503757	0.18559	0.205586
6	rs16894876	0	29494728	A	G	690	rs16894876_A	12832.9	12834.3	0.438368	0.494675	0.658875	0.738804	0.75997	0.57349
6	rs3094562	0	29496285	G	A	691	rs3094562_G	12830.1	12827.7	0.0363619	0.140886	0.203479	0.254467	0.386957	0.380877
6	rs2523421	0	29498419	G	A	692	rs2523421_G	12832.9	12829.6	0.0209716	0.0680411	0.0573585	0.0477375	0.0735142	0.0697947
6	rs1419643	0	29499915	C	A	693	rs1419643_C	12832.9	12831.9	0.0830497	0.123383	0.303945	0.0491816	0.350092	0.433555
6	rs2746148	0	29500951	G	A	694	rs2746148_G	12832.9	12832.4	0.116492	0.225538	0.222473	0.202549	0.310106	0.36186
6	rs2074470	0	29502406	G	A	695	rs2074470_G	12832.3	12830.5	0.0511367	0.182969	0.258938	0.321043	0.47196	0.463391
6	rs9257857	0	29502905	A	G	696	rs9257857_A	12830.1	12831.6	0.449123	0.53737	0.305695	0.569511	0.782674	0.840072
6	rs16894900	0	29503478	G	C	697	rs16894900_G	12832.3	12814.6	8.99845e-06	6.10094e-05	0.00627281	0.00838679	0.00524516	0.00443104
6	rs7770592	0	29503726	A	C	698	rs7770592_A	12829.5	12831.1	0.522794	0.804693	0.544103	0.612412	0.840282	0.613362
6	rs7757269	0	29504196	G	A	699	rs7757269_G	12832.9	12832.9	0.163914	0.100771	0.093507	0.0493372	0.0970486	0.129878
6	rs10946990	0	29504625	G	A	700	rs10946990_G	12832.9	12832	0.0897423	0.254362	0.261227	0.937314	0.445286	0.265247
6	rs7349908	0	29505500	A	T	701	rs7349908_A	12831.7	12830.8	0.0848864	0.248372	0.255293	0.94749	0.439076	0.259868
6	rs3131025	0	29506794	A	G	702	rs3131025_A	12832.9	12830.6	0.0391795	0.148636	0.215079	0.269046	0.405611	0.39736
6	rs16894908	0	29510414	A	G	703	rs16894908_A	12832.9	12822.4	0.000398936	0.000816477	0.0139074	0.0122901	0.0206456	0.00656253
6	rs6908560	0	29511251	A	G	704	rs6908560_A	12832.3	12834.3	0.833066	0.742321	0.684697	0.685824	0.779427	0.963555
6	rs3094561	0	29512136	A	C	705	rs3094561_A	12829.5	12831.1	0.495835	0.659207	0.560972	0.211192	0.884269	0.82083
6	rs9468532	0	29515357	G	A	706	rs9468532_G	12832.9	12833.4	0.224578	0.346281	0.310945	0.554777	0.371032	0.432168
6	rs6933601	0	29515581	A	G	707	rs6933601_A	12832.9	12834.4	0.499374	0.379609	0.385774	0.341905	0.702459	0.323663
6	rs116162459	0	29515934	A	G	708	rs116162459_A	12832.9	12834.9	0.932114	0.984854	0.998472	0.972088	0.940608	0.798767
6	rs2074469	0	29515949	G	A	709	rs2074469_G	12832.9	12834.8	0.798412	0.772189	0.935954	0.906364	0.723275	0.708357
6	rs11755177	0	29515954	A	G	710	rs11755177_A	12827.4	12829.4	0.962658	0.914791	0.805981	0.848967	0.949259	0.911478
6	rs11755182	0	29516036	A	C	711	rs11755182_A	12832.3	12834.2	0.727073	0.834612	0.969571	0.915423	0.8114	0.675093
6	rs2074468	0	29516249	A	G	712	rs2074468_A	12832.3	12818.5	7.1555e-05	0.00042102	0.0171889	0.0172431	0.00926494	0.00785061
6	rs2074466	0	29516292	A	C	713	rs2074466_A	12832.9	12834.7	0.626848	0.69754	0.415267	0.741014	0.957663	0.985594
6	rs10946991	0	29516533	C	A	714	rs10946991_C	12831.7	12817.1	4.47659e-05	0.000247646	0.0110915	0.0116979	0.00583427	0.00546172
6	rs11968123	0	29516700	C	A	715	rs11968123_C	12832.9	12834.8	0.788435	0.860061	0.759309	0.766308	0.700034	0.567666
6	rs10946992	0	29518680	G	A	716	rs10946992_G	12832.3	12821.7	0.000379806	0.000792032	0.0133405	0.011963	0.0197003	0.00612609
6	rs1535039	0	29519411	G	A	717	rs1535039_G	12832.3	12809.8	7.5391e-07	3.93292e-05	0.000389272	1.46516e-07	6.61495e-05	0.000115881
6	rs16894919	0	29520201	A	C	718	rs16894919_A	12832.3	12821.9	0.000420311	0.000757318	0.0106592	0.0100167	0.016043	0.00462749
6	rs7738742	0	29522325	G	A	719	rs7738742_G	12832.9	12834.1	0.386549	0.286684	0.281629	0.242947	0.529584	0.220763
6	rs7739243	0	29522592	G	A	720	rs7739243_G	12832.3	12820.8	0.000231884	0.00050071	0.00883454	0.0076923	0.0125679	0.00370686
6	rs2523443	0	29523443	A	C	721	rs2523443_A	12832.9	12809.9	5.92117e-07	3.19157e-05	0.000323483	1.13483e-07	5.40588e-05	9.51879e-05
6	rs6906897	0	29523615	A	G	722	rs6906897_A	12832.3	12820.8	0.000231884	0.00050071	0.00883454	0.0076923	0.0125679	0.00370686
6	rs6929603	0	29523631	G	A	723	rs6929603_G	12832.9	12833.3	0.212784	0.275559	0.389206	0.363788	0.313882	0.24312
6	rs6935708	0	29524631	G	A	724	rs6935708_G	12832.9	12833.1	0.183276	0.137433	0.11925	0.100926	0.270303	0.0997863
6	rs2523442	0	29525796	G	A	725	rs2523442_G	12832.3	12829.2	0.0232193	0.063026	0.0419745	0.0279027	0.016129	0.0133798
6	rs7738548	0	29529188	A	G	726	rs7738548_A	12832.9	12821.5	0.000255729	0.000631455	0.0103226	0.0105811	0.0191875	0.0049994
6	rs3094574	0	29530071	A	G	727	rs3094574_A	12831.7	12833.2	0.48062	0.630656	0.548975	0.200665	0.851485	0.840964
6	rs2523440	0	29530222	G	A	728	rs2523440_G	12832.9	12834.7	0.645502	0.793149	0.966405	0.990344	0.9457	0.997163
6	rs9257863	0	29533563	C	A	729	rs9257863_C	12832.9	12834.6	0.566735	0.658442	0.384823	0.682425	0.906602	0.963282
6	rs3117194	0	29533987	A	G	730	rs3117194_A	12830.1	12831.9	0.620397	0.779813	0.654662	0.262297	0.986867	0.713747
6	rs6456951	0	29534182	A	T	731	rs6456951_A	12832.9	12821.5	0.000255729	0.000631455	0.0103226	0.0105811	0.0191875	0.0049994
6	rs2523439	0	29535499	A	G	732	rs2523439_A	12832.3	12830.7	0.056962	0.13842	0.102166	0.0691364	0.0434147	0.0369761
6	rs2021729	0	29537371	A	G	733	rs2021729_A	12832.9	12831.1	0.0521092	0.127238	0.093015	0.0624766	0.0392513	0.0337547
6	rs2073148	0	29538149	G	A	734	rs2073148_G	12832.9	12821.7	0.000286201	0.000605385	0.00817749	0.00879271	0.0154592	0.00371718
6	rs3128854	0	29539677	A	G	735	rs3128854_A	12817.9	12819.8	0.670011	0.834615	0.707198	0.292977	0.962236	0.66676
6	rs1345228	0	29540369	G	A	736	rs1345228_G	12832.9	12834.7	0.70221	0.856853	0.534972	0.834854	0.9244	0.986186
6	rs2107192	0	29541921	A	G	737	rs2107192_A	12832.3	12830.6	0.0536073	0.130611	0.0959156	0.0639719	0.0399347	0.0343328
6	rs2107191	0	29542274	G	A	738	rs2107191_G	12832.9	12834.6	0.607546	0.765044	0.644277	0.25798	0.974578	0.724759
6	rs4713226	0	29542393	A	G	739	rs4713226_A	12832.9	12834.6	0.57454	0.44163	0.978269	0.792767	0.894299	0.71126
6	rs2746149	0	29543334	G	A	740	rs2746149_G	12832.3	12810.7	1.19709e-06	5.36185e-05	0.000437224	1.67241e-07	7.11805e-05	0.000122436
6	rs11961170	0	29547084	T	A	741	rs11961170_T	12832.9	12819.7	9.975e-05	0.000566815	0.0178035	0.0217761	0.0135471	0.00823187
6	rs16894948	0	29548236	A	G	742	rs16894948_A	12832.9	12821.7	0.000286201	0.000605385	0.00817749	0.00879271	0.0154592	0.00371718
6	rs11966831	0	29548341	A	C	743	rs11966831_A	12713.9	12713.3	0.107882	0.0949953	0.0952412	0.0776144	0.0967241	0.155917
6	rs12206077	0	29548720	A	G	744	rs12206077_A	12832.9	12830.4	0.0341439	0.120773	0.124904	0.73144	0.238898	0.108923
6	rs1362077	0	29548967	A	G	745	rs1362077_A	12832.9	12834.8	0.793892	0.683875	0.540076	0.586979	0.556307	0.485444
6	rs1362076	0	29549148	A	C	746	rs1362076_A	12832.9	12834.8	0.713021	0.793539	0.743653	0.779267	0.69606	0.468562
6	rs7751705	0	29549597	A	G	747	rs7751705_A	12832.9	12834.2	0.395867	0.380697	0.382958	0.350965	0.5971	0.252938
6	rs2746150	0	29550680	A	G	748	rs2746150_A	12832.9	12810.1	6.55069e-07	3.42338e-05	0.000343757	1.218e-07	5.76544e-05	0.000102017
6	rs2523444	0	29550810	A	G	749	rs2523444_A	12832.3	12831	0.0696451	0.142516	0.137641	0.110613	0.189317	0.198101
6	rs7769924	0	29551905	G	A	750	rs7769924_G	12832.9	12834.4	0.473269	0.42321	0.410746	0.393704	0.640835	0.247599
6	rs1233495	0	29552100	A	G	751	rs1233495_A	12823.2	12811	0.000162801	0.00246601	0.0025895	0.000102149	0.00411785	0.00683375
6	rs3094573	0	29554611	C	A	752	rs3094573_C	12832.9	12834.7	0.710784	0.883032	0.756249	0.339288	0.89266	0.575003
6	rs11963957	0	29554834	A	G	753	rs11963957_A	12832.9	12834.5	0.511148	0.640762	0.608294	0.6478	0.587824	0.420128
6	rs7771335	0	29556017	G	A	754	rs7771335_G	12832.9	12834.4	0.473269	0.42321	0.410746	0.393704	0.640835	0.247599
6	rs17415601	0	29560390	G	A	755	rs17415601_G	12832.9	12832.8	0.148299	0.117154	0.198959	0.415568	0.834562	0.685728
6	rs10484547	0	29560753	C	G	756	rs10484547_C	12832.9	12834	0.34141	0.306116	0.280331	0.264995	0.459672	0.171574
6	rs2066951	0	29562468	C	A	757	rs2066951_C	12825.5	12827.1	0.529664	0.480574	0.468613	0.451181	0.71287	0.289337
6	rs9348832	0	29564000	A	G	758	rs9348832_A	12832.9	12831.3	0.0596124	0.0939319	0.111638	0.100621	0.0781505	0.0794412
6	rs11756938	0	29564633	A	G	759	rs11756938_A	12832.9	12834.8	0.734059	0.773989	0.755819	0.72776	0.594158	0.635302
6	rs1233492	0	29566456	G	A	760	rs1233492_G	12832.9	12831.1	0.0503511	0.118514	0.0882721	0.0550906	0.035899	0.0279589
6	rs3128844	0	29567239	G	C	761	rs3128844_G	12832.3	12834.1	0.675586	0.830913	0.70014	0.30488	0.943671	0.621292
6	rs1233491	0	29569709	C	G	762	rs1233491_C	12832.9	12810	6.1613e-07	3.28369e-05	0.00033188	1.14254e-07	5.50515e-05	9.7545e-05
6	rs1233490	0	29569893	G	A	763	rs1233490_G	12832.9	12831.1	0.051185	0.120759	0.0907214	0.0567651	0.0364942	0.0281686
6	rs1233489	0	29571022	A	T	764	rs1233489_A	12832.3	12808.8	4.33431e-07	2.57641e-05	0.000269864	8.61686e-08	4.40149e-05	7.93499e-05
6	rs6906307	0	29571871	C	A	765	rs6906307_C	12825	12826.5	0.47953	0.445403	0.458523	0.41033	0.673378	0.309837
6	rs2746147	0	29574587	A	G	766	rs2746147_A	12832.9	12831.4	0.0635995	0.144062	0.109809	0.0712523	0.0469963	0.0362134
6	rs1345227	0	29574935	G	A	767	rs1345227_G	12830.1	12831.6	0.480697	0.382259	0.529532	0.99739	0.257143	0.118819
6	rs7766082	0	29575985	G	A	768	rs7766082_G	12832.9	12834.4	0.504525	0.478119	0.503861	0.470769	0.760461	0.322644
6	rs7746192	0	29576186	A	G	769	rs7746192_A	12821.1	12822.8	0.580005	0.596883	0.596852	0.532083	0.493106	0.632142
6	rs1233487	0	29576788	G	A	770	rs1233487_G	12832.9	12820.9	0.000186673	0.00276549	0.00289757	0.000116925	0.00465754	0.00764301
6	rs9257873	0	29576947	C	A	771	rs9257873_C	12832.3	12834	0.593934	0.67357	0.395934	0.699016	0.926524	0.989657
6	rs1233486	0	29577631	A	G	772	rs1233486_A	12832.3	12830.6	0.0530596	0.12489	0.0926454	0.0590877	0.0385547	0.0301739
6	rs1234843	0	29577919	G	A	773	rs1234843_G	12824	12822.8	0.0740653	0.161231	0.121619	0.0826429	0.0567609	0.0411167
6	rs1233485	0	29578187	G	A	774	rs1233485_G	12781.7	12779.7	0.0445621	0.103383	0.0789602	0.0496478	0.0422615	0.0198131
6	rs3131019	0	29578964	C	A	775	rs3131019_C	12832.3	12833.7	0.432211	0.356434	0.498528	0.935471	0.226314	0.112266
6	rs16894986	0	29579851	G	C	776	rs16894986_G	12832.3	12834.2	0.794133	0.684089	0.540271	0.587117	0.556439	0.485583
6	rs11961013	0	29579913	A	G	777	rs11961013_A	12832.9	12832.4	0.117334	0.0797966	0.086604	0.0500765	0.0995694	0.128607
6	rs757256	0	29580895	A	G	778	rs757256_A	12830	12831.5	0.471975	0.416144	0.362767	0.931494	0.358893	0.269987
6	rs3130858	0	29581480	C	A	779	rs3130858_C	12832.3	12834.3	0.914598	0.185255	0.429871	0.155322	0.168357	0.164665
6	rs734959	0	29582641	G	A	780	rs734959_G	12795	12796.4	0.420211	0.333076	0.470841	0.911798	0.206234	0.0971742
6	rs734961	0	29583018	A	C	781	rs734961_A	12824.8	12826.6	0.721385	0.770775	0.479967	0.824084	0.946417	0.875885
6	rs734960	0	29583121	A	G	782	rs734960_A	12790.4	12792.2	0.709167	0.74743	0.46013	0.792387	0.975374	0.901114
6	rs1233482	0	29583661	A	C	783	rs1233482_A	12828.3	12826.4	0.0507433	0.120071	0.0874609	0.0537127	0.0351797	0.0274388
6	rs3131020	0	29583881	A	G	784	rs3131020_A	12832.3	12833.8	0.46987	0.416895	0.362846	0.932332	0.364845	0.262872
6	rs3131021	0	29584121	A	G	785	rs3131021_A	12831.7	12833.5	0.667213	0.563827	0.708892	0.771823	0.349507	0.223464
6	rs3128847	0	29584304	A	G	786	rs3128847_A	12831.1	12829.9	0.0716291	0.428	0.266499	0.682079	0.866802	0.86
6	rs9257877	0	29584487	A	C	787	rs9257877_A	12832.9	12834.7	0.659647	0.526127	0.883587	0.929664	0.988506	0.780654
6	rs3131022	0	29584663	C	G	788	rs3131022_C	12824.6	12825.7	0.347522	0.272534	0.203298	0.780731	0.271813	0.170749
6	rs1557820	0	29585219	A	G	789	rs1557820_A	12832.3	12833.6	0.394598	0.321927	0.257864	0.848449	0.272956	0.1674
6	rs1557819	0	29585252	C	A	790	rs1557819_C	12832.9	12834.2	0.404259	0.328657	0.265996	0.864897	0.285449	0.169818
6	rs4959120	0	29585274	C	G	791	rs4959120_C	12831.1	12831.6	0.206506	0.172703	0.593425	0.39646	0.480551	0.333157
6	rs1233480	0	29585393	A	G	792	rs1233480_A	12832.9	12814.7	7.18718e-06	0.000312437	0.00244972	3.34062e-06	0.000413997	0.00116631
6	rs2158281	0	29585762	G	C	793	rs2158281_G	12831.7	12833	0.39911	0.323024	0.261387	0.857716	0.280041	0.166744
6	rs9357082	0	29585836	G	A	794	rs9357082_G	12832.9	12827.3	0.00597199	0.00864224	0.0143821	0.0129325	0.0120388	0.0125889
6	rs2285792	0	29586149	G	A	795	rs2285792_G	12831.1	12832.9	0.620078	0.664948	0.392357	0.712278	0.945161	0.988181
6	rs2285791	0	29586280	A	G	796	rs2285791_A	12832.9	12834.7	0.665082	0.708093	0.401899	0.738694	0.977701	0.956065
6	rs3094572	0	29588972	A	G	797	rs3094572_A	12832.9	12834.5	0.508531	0.400007	0.531771	0.983548	0.242156	0.117953
6	rs2523433	0	29590411	A	G	798	rs2523433_A	12832.3	12830.5	0.0519172	0.106224	0.0816204	0.0540457	0.0483624	0.0378793
6	rs1592412	0	29591818	A	C	799	rs1592412_A	12832.9	12834.5	0.554662	0.440101	0.577564	0.963067	0.270846	0.139968
6	rs1592410	0	29591947	A	G	800	rs1592410_A	12832.9	12834.3	0.438046	0.368021	0.306549	0.929852	0.321887	0.200144
6	rs1015869	0	29592645	A	G	801	rs1015869_A	12832.3	12833.7	0.446639	0.376033	0.31108	0.937819	0.327174	0.20363
6	rs9257887	0	29593268	A	G	802	rs9257887_A	12832.9	12834.8	0.816861	0.870441	0.534395	0.886351	0.876956	0.794966
6	rs2189372	0	29594044	G	A	803	rs2189372_G	12832.3	12833.7	0.433762	0.363005	0.302139	0.924331	0.321039	0.194808
6	rs2859876	0	29594194	C	G	804	rs2859876_C	12832.9	12834.3	0.45641	0.384844	0.318481	0.948919	0.334033	0.209064
6	rs3094564	0	29594324	G	A	805	rs3094564_G	12832.9	12834.5	0.539532	0.425433	0.55996	0.982325	0.262576	0.130121
6	rs16894996	0	29594592	A	G	806	rs16894996_A	12831.1	12833.1	0.869812	0.767696	0.614511	0.674264	0.663352	0.589985
6	rs9257890	0	29594887	A	G	807	rs9257890_A	12832.9	12834.6	0.596335	0.639	0.368922	0.676724	0.899326	0.96507
6	rs2745400	0	29596228	A	G	808	rs2745400_A	12831.1	12816	3.47189e-05	0.00147705	0.00305898	0.00231225	0.00123108	0.000568468
6	rs2523429	0	29596395	A	C	809	rs2523429_A	12832.9	12821.5	0.000257006	0.00719378	0.0149772	0.00898864	0.00376453	0.00235885
6	rs2745401	0	29596457	G	A	810	rs2745401_G	12831.7	12825.1	0.00336384	0.0413486	0.0660663	0.0446487	0.0271663	0.0133685
6	rs3130855	0	29596555	A	C	811	rs3130855_A	12787.1	12781.9	0.00715494	0.0389409	0.167201	0.28792	0.420541	0.319942
6	rs1419644	0	29596616	T	A	812	rs1419644_T	12832.9	12834.9	0.895542	0.892978	0.827526	0.817101	0.918792	0.578656
6	rs724078	0	29597027	A	G	813	rs724078_A	12832.9	12822.4	0.000409439	0.00330266	0.0076017	0.00575384	0.00745547	0.00307295
6	rs7752486	0	29600542	A	C	814	rs7752486_A	12832.9	12831.1	0.0519979	0.026452	0.0181928	0.00880546	0.0181404	0.0282432
6	rs969931	0	29602876	C	A	815	rs969931_C	12830.1	12818.4	0.0002122	0.00512971	0.0113185	0.00702736	0.00299228	0.002235
6	rs2745406	0	29604062	G	A	816	rs2745406_G	12832.9	12821.6	0.000272398	0.00611229	0.0134032	0.0086544	0.00411414	0.0028728
6	rs6939431	0	29604199	A	G	817	rs6939431_A	12832.9	12834.9	0.871906	0.828083	0.875504	0.940876	0.496766	0.544197
6	rs1233427	0	29604643	A	G	818	rs1233427_A	12832.9	12820.2	0.000126326	0.00367753	0.00841236	0.00533161	0.0025872	0.00111966
6	rs9501676	0	29604755	A	G	819	rs9501676_A	12832.9	12832.1	0.0968574	0.0560441	0.0471638	0.0266951	0.049976	0.0736519
6	rs9501677	0	29604981	A	G	820	rs9501677_A	12832.9	12834.3	0.438042	0.480313	0.50176	0.527466	0.632827	0.287905
6	rs1233426	0	29606081	A	G	821	rs1233426_A	12832.3	12819.5	0.000122212	0.0035594	0.0081776	0.00512685	0.00247475	0.00107953
6	rs1233425	0	29606476	G	C	822	rs1233425_G	12827.4	12816.3	0.000298113	0.00668414	0.0142065	0.00888761	0.00393767	0.00296491
6	rs1233424	0	29607168	A	G	823	rs1233424_A	12832.3	12833	0.255722	0.20243	0.173543	0.241742	0.247292	0.247667
6	rs362546	0	29607395	G	A	824	rs362546_G	12805.1	12790.1	3.67903e-05	0.0012462	0.00298267	0.00181872	0.000823121	0.000342156
6	rs909968	0	29607484	A	G	825	rs909968_A	12822.9	12810.2	0.00012709	0.00356195	0.00834903	0.00540484	0.00285368	0.0011514
6	rs909967	0	29607516	G	A	826	rs909967_G	12813	12801.5	0.00024384	0.0056281	0.0122123	0.00758834	0.00331758	0.00248642
6	rs886381	0	29608204	A	G	827	rs886381_A	12829.4	12828.5	0.0882106	0.195387	0.140862	0.0907544	0.0663048	0.0520328
6	rs362544	0	29608266	G	A	828	rs362544_G	12753.9	12740.9	0.000104175	0.00287293	0.00657685	0.00385866	0.00177937	0.00110923
6	rs9468551	0	29608906	A	G	829	rs9468551_A	12832.9	12834.4	0.47429	0.51869	0.538896	0.563703	0.6711	0.310633
6	rs9968	0	29609016	C	G	830	rs9968_C	12830.6	12816.5	6.25659e-05	0.00257279	0.00565953	0.00299885	0.000902099	0.000353226
6	rs2294748	0	29609161	A	G	831	rs2294748_A	12821.8	12823.7	0.666452	0.791117	0.785603	0.950553	0.97206	0.993074
6	rs16895022	0	29609199	A	G	832	rs16895022_A	12832.9	12832.2	0.100641	0.071592	0.054432	0.0669036	0.0641744	0.0482722
6	rs9461533	0	29609401	G	A	833	rs9461533_G	12832.9	12831.1	0.0507396	0.027001	0.0185233	0.0108679	0.0224251	0.0391441
6	rs1233421	0	29609493	A	C	834	rs1233421_A	12832.9	12817.4	2.95135e-05	0.00131471	0.0030637	0.0013588	0.000454542	0.000194749
6	rs6456964	0	29610107	A	G	835	rs6456964_A	12832.9	12834.3	0.427169	0.458122	0.46148	0.523902	0.686853	0.3083
6	rs1233420	0	29611302	G	A	836	rs1233420_G	12832.9	12821.5	0.000248238	0.0078031	0.015688	0.00845234	0.00229144	0.00179868
6	rs6930217	0	29611761	G	A	837	rs6930217_G	12832.9	12834.8	0.833494	0.86486	0.803927	0.698361	0.518858	0.713076
6	rs419957	0	29613748	G	C	838	rs419957_G	12801	12787.9	0.000104	0.00416226	0.00855274	0.00475617	0.0015517	0.000629535
6	rs3025672	0	29614014	A	G	839	rs3025672_A	12832.3	12834.2	0.762428	0.777343	0.722901	0.63825	0.473719	0.652044
6	rs414282	0	29614239	G	A	840	rs414282_G	12832.9	12820.8	0.000177691	0.00502769	0.0123852	0.00791349	0.0040143	0.00155168
6	rs3025670	0	29614270	G	A	841	rs3025670_G	12832.9	12834.8	0.833494	0.86486	0.803927	0.698361	0.518858	0.713076
6	rs3025667	0	29615197	G	C	842	rs3025667_G	12832.9	12832.1	0.0968574	0.0560441	0.0471638	0.0266951	0.049976	0.0736519
6	rs362514	0	29615289	A	G	843	rs362514_A	12832.9	12823.8	0.000847626	0.0217588	0.0435067	0.0290522	0.00871136	0.00575663
6	rs446198	0	29615405	A	G	844	rs446198_A	12832.3	12820	0.000151288	0.00548542	0.0113738	0.0064735	0.0020795	0.000903688
6	rs6931702	0	29615550	A	G	845	rs6931702_A	12832.9	12828.5	0.0117526	0.00741713	0.00577827	0.00359607	0.0142768	0.00217333
6	rs10484548	0	29616252	G	A	846	rs10484548_G	12832.9	12832.1	0.0968574	0.0560441	0.0471638	0.0266951	0.049976	0.0736519
6	rs362540	0	29618304	G	A	847	rs362540_G	12832.3	12827.9	0.0115274	0.106259	0.0997378	0.0602022	0.0241957	0.0181996
6	rs362538	0	29618609	C	G	848	rs362538_C	12811	12805.7	0.00691582	0.0211772	0.0314158	0.131201	0.166157	0.0876167
6	rs1233417	0	29619829	G	A	849	rs1233417_G	12832.9	12831.7	0.0726806	0.237926	0.287756	0.253587	0.186625	0.14462
6	rs426595	0	29620461	A	G	850	rs426595_A	12832.9	12827.3	0.0059407	0.067617	0.0634099	0.0389492	0.0177339	0.0081336
6	rs407161	0	29621786	A	G	851	rs407161_A	12832.9	12828.2	0.00984395	0.0944462	0.087458	0.0540795	0.0228653	0.0165819
6	rs398616	0	29622209	A	G	852	rs398616_A	12832.9	12827.3	0.00579722	0.0666425	0.0625254	0.0383742	0.0174189	0.00796321
6	rs3094575	0	29623781	A	G	853	rs3094575_A	12832.9	12832.1	0.0976499	0.306504	0.35841	0.314202	0.227542	0.17549
6	rs3094576	0	29624221	A	C	854	rs3094576_A	12832.9	12834.2	0.408821	0.906684	0.935213	0.751565	0.695926	0.840716
6	rs376681	0	29625072	G	A	855	rs376681_G	12832.9	12820.2	0.0001282	0.00504168	0.0112175	0.00689697	0.00198586	0.000975636
6	rs365488	0	29625937	A	G	856	rs365488_A	12827.8	12817.3	0.000396482	0.0113395	0.0234527	0.0142076	0.00376928	0.00328932
6	rs2745411	0	29626421	A	G	857	rs2745411_A	12832.3	12822.6	0.000629871	0.014179	0.032868	0.0236053	0.0109557	0.00880451
6	rs417374	0	29626451	G	A	858	rs417374_G	12832.9	12821.9	0.000318276	0.00953877	0.020293	0.0119591	0.00303488	0.00270897
6	rs6902738	0	29626458	G	A	859	rs6902738_G	12832.9	12834.8	0.833494	0.86486	0.803927	0.698361	0.518858	0.713076
6	rs9368606	0	29626644	C	A	860	rs9368606_C	12832.9	12833.4	0.230551	0.221459	0.42366	0.221459	0.1278	0.124424
6	rs7763643	0	29626933	A	G	861	rs7763643_A	12827.8	12829.8	0.833244	0.864542	0.8037	0.698559	0.518877	0.713268
6	rs17351888	0	29627152	G	A	862	rs17351888_G	12832.9	12834.6	0.617283	0.340061	0.337046	0.0340839	0.412893	0.83537
6	rs453658	0	29627827	G	A	863	rs453658_G	12832.9	12820.4	0.000141896	0.00535844	0.0119947	0.00743066	0.00222442	0.00110249
6	rs6915177	0	29630567	A	G	864	rs6915177_A	12832.9	12834.3	0.427169	0.450984	0.454904	0.514248	0.679188	0.300415
6	rs7757931	0	29631649	A	C	865	rs7757931_A	12824.3	12825.3	0.31994	0.348656	0.359992	0.436339	0.578594	0.239922
6	rs8337	0	29631655	C	G	866	rs8337_C	12832.3	12830.8	0.0606454	0.214868	0.20818	0.968913	0.368193	0.198103
6	rs2076487	0	29631838	C	G	867	rs2076487_C	12832.9	12834.3	0.462482	0.495428	0.497002	0.567255	0.751326	0.350819
6	rs2076485	0	29631931	G	A	868	rs2076485_G	12832.9	12831.7	0.0752911	0.172327	0.127714	0.0835295	0.0557209	0.050794
6	rs404240	0	29631936	G	A	869	rs404240_G	12832.9	12809.9	5.73788e-07	3.34626e-05	0.000365129	1.20082e-07	6.23042e-05	0.000113931
6	rs2534790	0	29632147	A	C	870	rs2534790_A	12786.9	12785.7	0.0757907	0.174276	0.12504	0.0807937	0.0545692	0.0497403
6	rs362536	0	29634919	A	G	871	rs362536_A	12832.9	12822.5	0.000421389	0.011897	0.0241245	0.013757	0.00344512	0.0031428
6	rs64036	0	29635246	A	C	872	rs64036_A	12831.7	12832.8	0.339679	0.367663	0.360729	0.390804	0.486589	0.209139
6	rs1233406	0	29635560	C	A	873	rs1233406_C	12832.9	12833.8	0.290503	0.226448	0.217049	0.290307	0.299109	0.302682
6	rs362535	0	29635600	G	A	874	rs362535_G	12832.9	12834.9	0.938904	0.854428	0.700659	0.74854	0.705091	0.644945
6	rs362513	0	29636297	G	A	875	rs362513_G	12832.9	12821.2	0.000216665	0.00630717	0.015214	0.0116679	0.00579675	0.002886
6	rs362533	0	29636876	C	G	876	rs362533_C	12832.9	12834.9	0.913612	0.190908	0.437035	0.160024	0.174689	0.17452
6	rs995185	0	29637116	A	T	877	rs995185_A	12830.1	12826.4	0.0164839	0.100586	0.240833	0.222907	0.118898	0.121183
6	rs1233405	0	29637733	A	G	878	rs1233405_A	12832.9	12820.8	0.000173975	0.00628436	0.013507	0.0080825	0.00235561	0.00119772
6	rs362532	0	29638392	G	A	879	rs362532_G	12832.9	12830.1	0.0282107	0.0201291	0.0219377	0.0174911	0.0671761	0.0129117
6	rs362531	0	29638434	A	G	880	rs362531_A	12832.9	12829.8	0.0234796	0.0152768	0.0132472	0.0105893	0.0426284	0.00683144
6	rs362512	0	29638607	A	G	881	rs362512_A	12827.4	12816.4	0.000312553	0.00951646	0.0205288	0.0115934	0.00268694	0.00240315
6	rs362511	0	29638829	G	A	882	rs362511_G	12829.5	12818.6	0.000323594	0.000562557	0.00317023	0.00140722	0.00494184	0.00123618
6	rs362529	0	29638847	A	G	883	rs362529_A	12832.9	12832.4	0.115725	0.601839	0.652492	0.833826	0.398409	0.451041
6	rs362527	0	29639797	G	A	884	rs362527_G	12832.3	12830.8	0.0616793	0.179748	0.131187	0.135646	0.0909361	0.0605479
6	rs2523447	0	29640718	A	G	885	rs2523447_A	12832.9	12831.3	0.0576733	0.141188	0.101901	0.0941712	0.0857231	0.0570695
6	rs388234	0	29641274	G	A	886	rs388234_G	12832.9	12823.3	0.000658454	0.007484	0.0278142	0.0279012	0.0169699	0.0119756
6	rs3094577	0	29641849	A	G	887	rs3094577_A	12832.9	12834.6	0.601199	0.789323	0.834437	0.42788	0.529726	0.306397
6	rs12525160	0	29643196	A	G	888	rs12525160_A	12832.9	12831	0.0484339	0.341279	0.333441	0.466807	0.47461	0.544248
6	rs1235162	0	29645203	G	A	889	rs1235162_G	12832.3	12812.2	2.6437e-06	0.000117237	0.00112462	5.63331e-07	0.000205231	0.000347797
6	rs1233400	0	29645954	A	G	890	rs1233400_A	12832.9	12833.3	0.213615	0.0994045	0.354477	0.219983	0.166354	0.125182
6	rs1003582	0	29646382	C	G	891	rs1003582_C	12832.9	12824.4	0.00117605	0.0149787	0.0450188	0.034882	0.00746753	0.00418044
6	rs1233399	0	29647461	A	G	892	rs1233399_A	12832.9	12830.3	0.0327279	0.0224134	0.0882249	0.045604	0.0300857	0.017033
6	rs3025651	0	29647893	C	A	893	rs3025651_C	12832.9	12834.9	0.883209	0.274172	0.599688	0.223394	0.147823	0.148359
6	rs1003581	0	29648183	A	G	894	rs1003581_A	12790.5	12790.4	0.146751	0.715364	0.661218	0.877367	0.82617	0.874653
6	rs982558	0	29648501	A	G	895	rs982558_A	12832.9	12834.9	0.926881	0.952074	0.973874	0.909713	0.514794	0.464448
6	rs3025650	0	29650926	G	A	896	rs3025650_G	12832.3	12834.3	0.928864	0.259465	0.594668	0.222184	0.151029	0.153519
6	rs362525	0	29651625	C	A	897	rs362525_C	12832.9	12831.5	0.0645687	0.392456	0.374465	0.524047	0.527046	0.606153
6	rs12528017	0	29652530	C	A	898	rs12528017_C	12832.9	12834.1	0.386636	0.260047	0.382863	0.694482	0.80973	0.928911
6	rs3117073	0	29652804	G	A	899	rs3117073_G	12832.9	12834.9	0.928573	0.700537	0.989381	0.239563	0.774915	0.835187
6	rs362522	0	29653187	A	G	900	rs362522_A	12832.9	12833.9	0.331358	0.84469	0.643706	0.84859	0.732115	0.708709
6	rs1233397	0	29653694	G	A	901	rs1233397_G	12832.9	12834.7	0.703483	0.630021	0.972747	0.582311	0.262451	0.209605
6	rs1233396	0	29654778	A	G	902	rs1233396_A	12831.7	12815.3	1.75471e-05	0.000437953	0.00310858	5.14126e-06	0.000702541	0.00226138
6	rs926552	0	29656068	A	G	903	rs926552_A	12832.9	12816.2	1.55773e-05	0.000405672	0.00291671	4.55174e-06	0.000639374	0.00206687
6	rs6936331	0	29656754	A	G	904	rs6936331_A	12832.9	12828.8	0.0135296	0.0138317	0.0253388	0.0454665	0.193781	0.175739
6	rs1233394	0	29657240	A	C	905	rs1233394_A	12832.9	12832.4	0.116965	0.0429603	0.185012	0.135022	0.143446	0.071403
6	rs12530421	0	29657422	C	A	906	rs12530421_C	12832.9	12834.3	0.457111	0.250033	0.385629	0.636431	0.809668	0.877019
6	rs1233391	0	29658597	G	A	907	rs1233391_G	12832.3	12833.8	0.493118	0.419713	0.678345	0.419343	0.220734	0.141638
6	rs1233390	0	29659840	A	G	908	rs1233390_A	12832.9	12832.9	0.156857	0.0605644	0.231392	0.17182	0.182445	0.0911324
6	rs1233389	0	29660462	A	C	909	rs1233389_A	12812.8	12813.4	0.230064	0.0974515	0.326269	0.249912	0.262554	0.139076
6	rs1233388	0	29661706	G	A	910	rs1233388_G	12832.9	12834.4	0.492656	0.425589	0.710608	0.452587	0.242182	0.157519
6	rs362521	0	29664738	A	G	911	rs362521_A	12832.9	12834	0.354201	0.238418	0.383191	0.711328	0.781988	0.893469
6	rs1233386	0	29666169	A	G	912	rs1233386_A	12832.9	12832.6	0.127453	0.0504078	0.236458	0.174738	0.192686	0.100346
6	rs362520	0	29666343	G	A	913	rs362520_G	12832.9	12834.8	0.751187	0.0833671	0.285331	0.0882525	0.0950803	0.0958591
6	rs1233384	0	29667274	A	G	914	rs1233384_A	12832.9	12832.6	0.127453	0.0504078	0.236458	0.174738	0.192686	0.100346
6	rs6912589	0	29669829	A	G	915	rs6912589_A	12832.9	12834.8	0.808117	0.676999	0.535244	0.80759	0.722493	0.678677
6	rs17508548	0	29671046	C	A	916	rs17508548_C	12794.7	12796.6	0.700297	0.987272	0.837542	0.667787	0.744747	0.857165
6	rs9468559	0	29673266	C	A	917	rs9468559_C	12832.9	12834.3	0.45422	0.387817	0.520127	0.229862	0.197006	0.203857
6	rs3095273	0	29674348	A	G	918	rs3095273_A	12816.3	12818.3	0.835043	0.931801	0.772351	0.315899	0.772262	0.791131
6	rs3025646	0	29674821	G	A	919	rs3025646_G	12832.9	12834.6	0.56689	0.313298	0.456703	0.709027	0.7199	0.811037
6	rs362518	0	29675617	G	A	920	rs362518_G	12832.9	12834.8	0.770076	0.921071	0.888798	0.71461	0.788919	0.901373
6	rs362517	0	29677024	A	G	921	rs362517_A	12832.9	12833.3	0.206154	0.245927	0.211789	0.239831	0.766733	0.855616
6	rs3025643	0	29677934	A	G	922	rs3025643_A	12832.3	12834.3	0.817615	0.985227	0.72814	0.337406	0.839954	0.790781
6	rs3025642	0	29678295	A	G	923	rs3025642_A	12826.1	12825.4	0.102172	0.122492	0.104187	0.124828	0.520357	0.615904
6	rs3025640	0	29678644	A	G	924	rs3025640_A	12832.9	12830.4	0.033932	0.121673	0.0939981	0.106054	0.0752261	0.0518415
6	rs2267633	0	29678820	G	A	925	rs2267633_G	12830.1	12832	0.772105	0.91307	0.897708	0.720318	0.793296	0.904878
6	rs10946999	0	29679588	A	C	926	rs10946999_A	12832.9	12834.2	0.392579	0.448738	0.363683	0.634731	0.916125	0.958789
6	rs740884	0	29682610	A	G	927	rs740884_A	12817.9	12815	0.0263986	0.0936103	0.0741586	0.0821421	0.0581606	0.034712
6	rs29261	0	29684177	G	A	928	rs29261_G	12832.9	12827.5	0.00674932	0.0190224	0.012944	0.0139616	0.0702114	0.0689618
6	rs29230	0	29684372	G	A	929	rs29230_G	12832.9	12832.2	0.0985716	0.281708	0.177764	0.115771	0.130089	0.142369
6	rs29262	0	29684571	G	A	930	rs29262_G	12832.9	12827.6	0.00701756	0.0195528	0.0133091	0.0144044	0.0717748	0.0705369
6	rs29258	0	29685596	A	G	931	rs29258_A	12832.3	12827	0.00680275	0.0191248	0.0130148	0.0140477	0.0704602	0.0692124
6	rs29257	0	29686009	G	A	932	rs29257_G	12832.9	12827.6	0.00701756	0.0195528	0.0133091	0.0144044	0.0717748	0.0705369
6	rs29255	0	29687523	C	A	933	rs29255_C	12832.9	12834.1	0.377425	0.254091	0.373483	0.681701	0.816964	0.933742
6	rs29253	0	29688415	G	A	934	rs29253_G	12832.3	12827.3	0.00831551	0.0230482	0.0167838	0.017677	0.0836186	0.0798749
6	rs29227	0	29688567	A	C	935	rs29227_A	12830.1	12824.8	0.00685284	0.0191265	0.0129963	0.0140656	0.0706609	0.0694522
6	rs29226	0	29688990	C	A	936	rs29226_C	12830.1	12825.4	0.0093349	0.025272	0.0185058	0.0195667	0.0909984	0.0875297
6	rs2267634	0	29690191	C	G	937	rs2267634_C	12832.9	12834.8	0.755595	0.848603	0.895215	0.692228	0.911576	0.991428
6	rs3025632	0	29690279	A	G	938	rs3025632_A	12832.9	12828.9	0.0143169	0.0402215	0.0309604	0.0278441	0.0249381	0.0169272
6	rs16867690	0	29693362	A	G	939	rs16867690_A	12830.1	12824.7	0.00659032	0.0186065	0.012639	0.0136322	0.0687691	0.067427
6	rs6919973	0	29695853	A	G	940	rs6919973_A	12832.9	12828.2	0.00955194	0.026137	0.0186186	0.019758	0.0910418	0.0868718
6	rs29223	0	29696523	C	A	941	rs29223_C	12832.3	12827.2	0.00760142	0.0212886	0.0141681	0.0153666	0.0755428	0.0740515
6	rs29221	0	29697103	C	G	942	rs29221_C	12830.1	12830.8	0.24473	0.727797	0.549919	0.755313	0.626612	0.605176
6	rs29220	0	29697645	G	C	943	rs29220_G	12832.3	12833.5	0.363655	0.911751	0.687304	0.962161	0.936838	0.898719
6	rs3828923	0	29698694	A	G	944	rs3828923_A	12832.9	12832.9	0.158077	0.101388	0.189732	0.423808	0.867447	0.736567
6	rs6938734	0	29699038	A	G	945	rs6938734_A	12832.9	12834.8	0.808117	0.676999	0.535244	0.80759	0.722493	0.678677
6	rs2267635	0	29700410	G	A	946	rs2267635_G	12832.9	12834	0.352062	0.235961	0.350927	0.654905	0.846363	0.963703
6	rs715044	0	29701767	A	C	947	rs715044_A	12817.9	12819.1	0.350392	0.233959	0.345461	0.649371	0.852881	0.974584
6	rs2021749	0	29706098	A	G	948	rs2021749_A	12832.9	12828.5	0.0112957	0.0300962	0.0219325	0.0236971	0.105062	0.100214
6	rs29243	0	29707081	A	G	949	rs29243_A	12832.9	12834.9	0.932007	0.736448	0.755956	0.99895	0.598666	0.588209
6	rs29218	0	29715408	G	A	950	rs29218_G	12832.3	12813.9	6.1898e-06	4.859e-05	0.000525169	8.69582e-06	0.00357825	0.00392806
6	rs29240	0	29715455	G	A	951	rs29240_G	12832.9	12817.6	3.2317e-05	0.000487885	8.60119e-05	0.00119268	0.00327354	0.0030555
6	rs3025623	0	29715726	A	G	952	rs3025623_A	12832.9	12817.6	3.2317e-05	0.000487885	8.60119e-05	0.00119268	0.00327354	0.0030555
6	rs1233374	0	29716673	G	A	953	rs1233374_G	12821.8	12814.3	0.00198332	0.00917234	0.00591205	0.00452555	0.0337061	0.0324319
6	rs29273	0	29718968	C	G	954	rs29273_C	12832.9	12834.9	0.93316	0.516826	0.426048	0.429955	0.44669	0.671512
6	rs29233	0	29719208	C	G	955	rs29233_C	12832.9	12830.4	0.0332209	0.0705669	0.0533658	0.0639441	0.275094	0.343766
6	rs29232	0	29719410	A	G	956	rs29232_A	12832.9	12832.9	0.158675	0.576795	0.526517	0.423274	0.221199	0.118761
6	rs3131854	0	29719864	A	G	957	rs3131854_A	12832.9	12834.1	0.373436	0.540509	0.630632	0.956194	0.645558	0.490252
6	rs16895214	0	29723772	C	A	958	rs16895214_C	12832.9	12834.7	0.685166	0.41585	0.49413	0.699826	0.741855	0.778477
6	rs3129073	0	29723801	G	A	959	rs3129073_G	12832.3	12816.7	2.70979e-05	0.000179047	0.00171462	3.63922e-05	0.00926916	0.00843352
6	rs439812	0	29724586	G	A	960	rs439812_G	12789.9	12790.8	0.294577	0.114047	0.478654	0.124267	0.408077	0.521142
6	rs29270	0	29725379	G	A	961	rs29270_G	12832.3	12831.4	0.0857566	0.220404	0.179952	0.184958	0.165419	0.113356
6	rs29269	0	29725726	A	G	962	rs29269_A	12832.9	12834.9	0.933139	0.513899	0.423609	0.429062	0.445835	0.670093
6	rs6920297	0	29726011	A	G	963	rs6920297_A	12832.9	12834.3	0.452699	0.348201	0.309282	0.182924	0.492047	0.1553
6	rs29272	0	29726345	A	C	964	rs29272_A	12832.9	12825.4	0.00210005	0.0106579	0.00261115	0.0233355	0.0608064	0.0515737
6	rs29231	0	29726504	A	G	965	rs29231_A	12832.9	12834.9	0.909052	0.381976	0.309992	0.323332	0.34447	0.570717
6	rs29254	0	29731573	G	A	966	rs29254_G	12832.9	12830.7	0.0401827	0.0818463	0.0624212	0.0731989	0.302142	0.376537
6	rs29234	0	29732091	C	A	967	rs29234_C	12832.9	12825.9	0.00270695	0.0124317	0.00300847	0.0274586	0.0751817	0.063089
6	rs3130250	0	29732980	A	G	968	rs3130250_A	12831.7	12828.8	0.0259448	0.0549204	0.082591	0.260468	0.247918	0.123405
6	rs2252711	0	29734300	G	A	969	rs2252711_G	12832.3	12833.1	0.279544	0.0900797	0.391851	0.0905909	0.312581	0.414584
6	rs9257932	0	29734355	G	A	970	rs9257932_G	12832.9	12833.2	0.199107	0.251422	0.294728	0.250531	0.533362	0.425101
6	rs3135050	0	29736416	A	G	971	rs3135050_A	12832.9	12831.8	0.0786565	0.151289	0.191399	0.491662	0.457693	0.262348
6	rs2535260	0	29736862	C	G	972	rs2535260_C	12827.7	12829	0.430009	0.124439	0.22932	0.201245	0.11517	0.242824
6	rs3117286	0	29737753	G	A	973	rs3117286_G	12832.9	12834.8	0.784712	0.959914	0.662523	0.886068	0.298299	0.365762
6	rs2535255	0	29739669	A	G	974	rs2535255_A	12822.4	12821.5	0.0854519	0.178834	0.0826776	0.204205	0.642766	0.580417
6	rs3130252	0	29739723	G	A	975	rs3130252_G	12832.9	12831.6	0.0704875	0.137958	0.176196	0.462042	0.430109	0.242301
6	rs2256266	0	29740297	A	G	976	rs2256266_A	12832.9	12833.8	0.301763	0.0974284	0.424812	0.0997966	0.341509	0.447102
6	rs6905408	0	29741754	A	G	977	rs6905408_A	12832.9	12831.9	0.0826702	0.168809	0.166781	0.177265	0.28881	0.205049
6	rs2857766	0	29741982	G	C	978	rs2857766_G	12767.2	12769.1	0.816223	0.709338	0.637628	0.696238	0.775701	0.641719
6	rs3130253	0	29741991	A	G	979	rs3130253_A	12832.9	12828.8	0.0133659	0.0463974	0.0762528	0.272568	0.375833	0.204177
6	rs2857767	0	29742247	C	G	980	rs2857767_C	12802.7	12804.6	0.738248	0.904947	0.614989	0.933511	0.322914	0.395287
6	rs2857770	0	29742695	A	G	981	rs2857770_A	12813.6	12815.6	0.868198	0.944595	0.720766	0.842308	0.273427	0.336982
6	rs17184514	0	29743389	C	A	982	rs17184514_C	12832.9	12834.9	0.941617	0.909499	0.784505	0.532028	0.403693	0.365997
6	rs926827	0	29743496	A	G	983	rs926827_A	12832.9	12832.2	0.0998756	0.232722	0.119399	0.282391	0.818561	0.762941
6	rs2071653	0	29743907	A	G	984	rs2071653_A	12832.9	12834.4	0.476583	0.639949	0.702038	0.92225	0.794177	0.61987
6	rs9257936	0	29747755	A	G	985	rs9257936_A	12832.9	12834.9	0.911623	0.971571	0.995589	0.75682	0.946644	0.819474
6	rs2535241	0	29748764	A	T	986	rs2535241_A	12831.7	12831	0.100295	0.233795	0.120036	0.283645	0.821955	0.766268
6	rs2747419	0	29750173	A	C	987	rs2747419_A	12832.9	12832.2	0.0994345	0.206198	0.0971347	0.23441	0.706306	0.639993
6	rs375984	0	29752481	A	G	988	rs375984_A	12832.9	12829.1	0.0163028	0.0274049	0.0647186	0.00273531	0.0938975	0.0894406
6	rs2535238	0	29753017	A	C	989	rs2535238_A	12832.9	12829.2	0.0175681	0.0295085	0.0691322	0.00300445	0.0998109	0.0951404
6	rs2747421	0	29753097	G	C	990	rs2747421_G	12832.9	12829	0.0152263	0.0258067	0.0618189	0.00252189	0.0881729	0.0835946
6	rs387603	0	29753557	A	C	991	rs387603_A	12832.9	12832.2	0.0994345	0.206198	0.0971347	0.23441	0.706306	0.639993
6	rs396660	0	29754144	A	G	992	rs396660_A	12832.9	12834.9	0.873511	0.981046	0.606334	0.473817	0.818725	0.908604
6	rs445150	0	29754858	G	A	993	rs445150_G	12832.9	12834.9	0.873511	0.981046	0.606334	0.473817	0.818725	0.908604
6	rs3870968	0	29755128	A	C	994	rs3870968_A	12832.9	12830.4	0.0343437	0.0709142	0.0541062	0.0625129	0.271306	0.342791
6	rs3129054	0	29757035	A	G	995	rs3129054_A	12831.7	12831.4	0.124907	0.613649	0.352354	0.467836	0.720182	0.483147
6	rs9500954	0	29757154	G	A	996	rs9500954_G	12832.9	12831	0.0477211	0.0691659	0.0855999	0.041036	0.0157464	0.0207963
6	rs3129051	0	29758101	A	T	997	rs3129051_A	12832.9	12832.3	0.106715	0.215925	0.102679	0.24698	0.729071	0.662385
6	rs423281	0	29759511	A	G	998	rs423281_A	12832.9	12832.3	0.106715	0.215953	0.102694	0.244306	0.721084	0.655457
6	rs385743	0	29759642	A	G	999	rs385743_A	12832.9	12831.9	0.0836053	0.175611	0.0800076	0.19805	0.637746	0.576471
6	rs2535236	0	29759664	A	G	1000	rs2535236_A	12818.8	12818	0.093312	0.497368	0.277433	0.385358	0.607188	0.389305
6	rs2747437	0	29760135	A	C	1001	rs2747437_A	12832.9	12832.2	0.0994345	0.206198	0.0971347	0.23441	0.706306	0.639993
6	rs3117292	0	29760178	G	A	1002	rs3117292_G	12832.9	12829.9	0.0255643	0.222409	0.10687	0.232937	0.439522	0.26099
6	rs3129045	0	29760555	A	C	1003	rs3129045_A	12818.5	12816.1	0.0356899	0.319263	0.129153	0.24033	0.550363	0.334052
6	rs2747442	0	29761165	G	A	1004	rs2747442_G	12831.7	12830.9	0.0943246	0.50652	0.280662	0.390009	0.61352	0.393752
6	rs2747444	0	29761271	C	A	1005	rs2747444_C	12832.9	12832.2	0.0994345	0.206198	0.0971347	0.23441	0.706306	0.639993
6	rs3117294	0	29761308	C	A	1006	rs3117294_C	12832.9	12830.4	0.0344099	0.309897	0.124489	0.234555	0.543029	0.328482
6	rs3117299	0	29761936	C	A	1007	rs3117299_C	12805	12799.6	0.00662218	0.0197153	0.0357589	0.00223895	0.137526	0.11867
6	rs3095286	0	29761943	A	G	1008	rs3095286_A	12809.8	12809.3	0.11509	0.569959	0.324294	0.441192	0.685444	0.453436
6	rs3117301	0	29762679	A	G	1009	rs3117301_A	12832.9	12829.5	0.0207365	0.0399387	0.0868099	0.00533692	0.141282	0.129824
6	rs2747453	0	29762922	G	A	1010	rs2747453_G	12832.9	12833.9	0.312144	0.0997425	0.15692	0.176575	0.171881	0.31764
6	rs2747454	0	29763092	A	G	1011	rs2747454_A	12822.3	12823.4	0.358925	0.0910666	0.157934	0.151947	0.13595	0.317292
6	rs2747457	0	29764396	C	A	1012	rs2747457_C	12832.3	12829	0.0209896	0.0402869	0.0874466	0.00539527	0.141951	0.130463
6	rs2894113	0	29769435	A	T	1013	rs2894113_A	12832.9	12834.7	0.633741	0.229312	0.605412	0.098917	0.4217	0.602811
6	rs3094736	0	29770353	A	T	1014	rs3094736_A	12832.3	12834.1	0.666262	0.249859	0.63207	0.106639	0.444804	0.630025
6	rs3129029	0	29770422	C	A	1015	rs3129029_C	12832.9	12833.9	0.315236	0.368824	0.440742	0.776917	0.639415	0.487627
6	rs3131888	0	29771868	G	A	1016	rs3131888_G	12832.3	12823.5	0.00102418	0.00039143	0.00217282	6.31986e-05	0.00329096	0.00792184
6	rs3129090	0	29772110	A	G	1017	rs3129090_A	12832.9	12833.7	0.269167	0.0773574	0.128914	0.148743	0.146557	0.275178
6	rs3131886	0	29772431	G	A	1018	rs3131886_G	12832.3	12830	0.0377201	0.0134851	0.0576763	0.00291421	0.0709816	0.126168
6	rs3131875	0	29774090	A	G	1019	rs3131875_A	12832.3	12834.3	0.993423	0.568216	0.809152	0.907346	0.583344	0.74938
6	rs3116803	0	29775851	G	A	1020	rs3116803_G	12828.4	12829.5	0.335513	0.379743	0.654146	0.0977365	0.814848	0.769412
6	rs3116802	0	29775869	G	A	1021	rs3116802_G	12832.9	12834.1	0.367403	0.412913	0.695331	0.10873	0.858054	0.810292
6	rs3129070	0	29776055	A	G	1022	rs3129070_A	12831.1	12832.4	0.378485	0.425479	0.710701	0.113012	0.873373	0.82509
6	rs9258102	0	29776892	G	A	1023	rs9258102_G	12821.8	12820.7	0.0755511	0.016214	0.0323623	0.0333092	0.027132	0.0744429
6	rs3116799	0	29776986	C	A	1024	rs3116799_C	12761.2	12761.3	0.174471	0.244845	0.404652	0.051735	0.793021	0.728312
6	rs6911622	0	29777730	A	G	1025	rs6911622_A	12832.3	12833	0.255465	0.47264	0.427074	0.462222	0.429249	0.327296
6	rs2107203	0	29777809	A	G	1026	rs2107203_A	12830.1	12831.3	0.360864	0.406282	0.686649	0.105213	0.842856	0.795653
6	rs6456993	0	29778515	A	G	1027	rs6456993_A	12816.8	12815.7	0.0819854	0.017895	0.0355258	0.0366067	0.029356	0.079341
6	rs9258117	0	29779074	A	G	1028	rs9258117_A	12824	12824.5	0.222359	0.0569164	0.0934697	0.114921	0.118351	0.253869
6	rs9258122	0	29779719	A	G	1029	rs9258122_A	12830.1	12831.4	0.379271	0.425251	0.711467	0.114213	0.87552	0.827624
6	rs3131865	0	29780144	G	C	1030	rs3131865_G	12832.9	12834.1	0.385471	0.48346	0.78811	0.113042	0.659172	0.632446
6	rs3131863	0	29781462	G	A	1031	rs3131863_G	12830.1	12831.9	0.669724	0.628559	0.540065	0.337498	0.850199	0.995984
6	rs11962017	0	29781979	A	G	1032	rs11962017_A	12832.3	12833.1	0.270407	0.489984	0.445338	0.476421	0.441441	0.340552
6	rs12663603	0	29782408	G	A	1033	rs12663603_G	12832.9	12819.3	7.82348e-05	0.000575188	0.000180798	0.00118297	0.000327723	0.000387514
6	rs1476573	0	29782627	A	G	1034	rs1476573_A	12832.3	12834.1	0.659526	0.618466	0.530646	0.329802	0.838817	0.993098
6	rs1476572	0	29782720	C	A	1035	rs1476572_C	12832.3	12834.1	0.66567	0.624489	0.535955	0.33435	0.847952	0.999108
6	rs7762253	0	29784802	A	G	1036	rs7762253_A	12832.9	12834.2	0.414788	0.5557	0.844677	0.404795	0.961177	0.760797
6	rs3871467	0	29785228	A	G	1037	rs3871467_A	12832.3	12834.1	0.615613	0.718579	0.883313	0.531047	0.957064	0.774068
6	rs1610742	0	29785931	G	A	1038	rs1610742_G	12832.9	12832.9	0.155716	0.22208	0.365064	0.0455067	0.764618	0.6955
6	rs1610594	0	29787026	G	A	1039	rs1610594_G	12832.9	12834.8	0.762122	0.729973	0.63907	0.408751	0.953915	0.896804
6	rs7741807	0	29788636	C	G	1040	rs7741807_C	12832.9	12833	0.164034	0.293757	0.311278	0.342453	0.726684	0.534811
6	rs1610597	0	29789679	A	G	1041	rs1610597_A	12832.9	12833.2	0.189041	0.275072	0.3175	0.657587	0.473893	0.336265
6	rs1632964	0	29790218	A	G	1042	rs1632964_A	12832.3	12832.1	0.137492	0.199386	0.335655	0.0394144	0.719332	0.648763
6	rs2524272	0	29790379	G	A	1043	rs2524272_G	12832.9	12834.8	0.762122	0.729973	0.63907	0.408751	0.953915	0.896804
6	rs1627567	0	29790845	A	T	1044	rs1627567_A	12832.3	12834.2	0.765882	0.732929	0.641767	0.410853	0.956244	0.894277
6	rs2735062	0	29790868	G	A	1045	rs2735062_G	12832.3	12833.9	0.547859	0.627852	0.986343	0.457835	0.867415	0.691358
6	rs1632962	0	29791787	A	G	1046	rs1632962_A	12832.9	12832.6	0.131705	0.192446	0.326173	0.0375261	0.704359	0.633825
6	rs2517912	0	29791923	A	G	1047	rs2517912_A	12832.3	12833.9	0.547843	0.627892	0.984916	0.459566	0.871061	0.693658
6	rs2517911	0	29792613	G	A	1048	rs2517911_G	12832.3	12831.3	0.0833517	0.113701	0.211436	0.0140234	0.48568	0.433668
6	rs7759272	0	29792973	G	A	1049	rs7759272_G	12832.9	12828	0.00848874	0.0334938	0.0341694	0.0433787	0.216779	0.16932
6	rs3757324	0	29797106	A	C	1050	rs3757324_A	12832.9	12828	0.00852184	0.0335751	0.0340148	0.0423254	0.213625	0.166225
6	rs3998799	0	29798673	G	C	1051	rs3998799_G	12809.9	12811.9	0.801055	0.716866	0.873375	0.598872	0.903069	0.951796
6	rs1362126	0	29798998	A	G	1052	rs1362126_A	12832.9	12834.8	0.751889	0.668938	0.923503	0.560096	0.946445	0.993751
6	rs1736926	0	29800541	A	G	1053	rs1736926_A	12830.1	12829.5	0.103302	0.166184	0.264934	0.484802	0.303579	0.173323
6	rs2076177	0	29801092	A	G	1054	rs2076177_A	12824.6	12819.7	0.00839102	0.0331757	0.03392	0.042605	0.212523	0.165323
6	rs2235383	0	29801478	G	A	1055	rs2235383_G	12832.9	12827.9	0.00819848	0.0323232	0.0330444	0.0417448	0.211385	0.16483
6	rs1736922	0	29801948	A	G	1056	rs1736922_A	12831.1	12830.2	0.0882197	0.120473	0.223158	0.0151412	0.505975	0.451616
6	rs3734814	0	29802659	C	A	1057	rs3734814_C	12790.4	12785.8	0.0106808	0.0458842	0.0399575	0.0497608	0.237939	0.184528
6	rs1628578	0	29803481	C	A	1058	rs1628578_C	12830.1	12829.3	0.0899827	0.123203	0.227718	0.015733	0.512626	0.458423
6	rs9258187	0	29803579	C	A	1059	rs9258187_C	12832.9	12827.9	0.00819848	0.0323232	0.0330444	0.0417448	0.211385	0.16483
6	rs2272874	0	29804224	G	A	1060	rs2272874_G	12832.9	12827.9	0.00819848	0.0323232	0.0330444	0.0417448	0.211385	0.16483
6	rs1611350	0	29806800	G	A	1061	rs1611350_G	12832.9	12830.7	0.0415003	0.0836046	0.0974959	0.00680395	0.245458	0.263041
6	rs3909134	0	29807232	G	A	1062	rs3909134_G	12832.9	12821.6	0.00026848	0.0022759	0.000770996	0.00392606	0.00108648	0.00126787
6	rs6910733	0	29807364	G	A	1063	rs6910733_G	12832.3	12823.9	0.00122412	0.00635895	0.00809068	0.00780698	0.0408382	0.0302571
6	rs2743922	0	29807692	A	C	1064	rs2743922_A	12832.9	12834.9	0.997375	0.895116	0.72196	0.797661	0.619653	0.665269
6	rs2523400	0	29807763	G	A	1065	rs2523400_G	12832.9	12824.7	0.00140832	0.00473083	0.0172736	0.00420249	0.0656114	0.0484107
6	rs2523399	0	29808058	G	A	1066	rs2523399_G	12832.9	12824.6	0.00137278	0.00459856	0.0168741	0.00409456	0.0642939	0.047328
6	rs1610601	0	29808162	A	C	1067	rs1610601_A	12832.9	12825.1	0.00179178	0.00500547	0.010265	0.000241002	0.0437284	0.037356
6	rs2735054	0	29808594	G	A	1068	rs2735054_G	12827.2	12819	0.00141723	0.0047456	0.0173895	0.00424376	0.0658706	0.0485962
6	rs2735052	0	29809543	A	G	1069	rs2735052_A	12832.9	12833.7	0.285414	0.302837	0.523157	0.267178	0.632304	0.596122
6	rs7755571	0	29809922	G	A	1070	rs7755571_G	12832.9	12824.7	0.00138445	0.00702966	0.00888094	0.00865954	0.044501	0.0329033
6	rs1610602	0	29810040	A	C	1071	rs1610602_A	12831.7	12829.3	0.0362244	0.052307	0.095867	0.0101593	0.264768	0.33048
6	rs2844833	0	29810185	C	G	1072	rs2844833_C	12832.9	12833.7	0.266223	0.080431	0.14623	0.153587	0.19876	0.314011
6	rs2523395	0	29810489	A	G	1073	rs2523395_A	12832.9	12833.8	0.288759	0.307215	0.530126	0.27106	0.639641	0.602841
6	rs2394159	0	29810658	G	A	1074	rs2394159_G	12832.9	12834.9	0.9727	0.867653	0.749552	0.772745	0.643218	0.689288
6	rs2394160	0	29811241	G	A	1075	rs2394160_G	12832.9	12833.7	0.275113	0.289699	0.504672	0.254769	0.612864	0.577532
6	rs1736915	0	29812295	A	G	1076	rs1736915_A	12832.9	12830.5	0.0355615	0.0520805	0.0954933	0.0100269	0.261817	0.328724
6	rs1736913	0	29812379	A	G	1077	rs1736913_A	12832.3	12831.6	0.0998989	0.161881	0.111382	0.0363342	0.229904	0.227942
6	rs9258208	0	29812524	A	G	1078	rs9258208_A	12832.3	12824.4	0.00166063	0.00821058	0.0109451	0.010269	0.0504329	0.0365657
6	rs7751815	0	29813063	A	G	1079	rs7751815_A	12832.3	12823.9	0.00122412	0.00635895	0.00809068	0.00780698	0.0408382	0.0302571
6	rs2523393	0	29813638	G	A	1080	rs2523393_G	12830.1	12831	0.283413	0.300069	0.518577	0.264465	0.628151	0.592793
6	rs2735051	0	29813667	A	G	1081	rs2735051_A	12832.3	12834.3	0.971579	0.866273	0.75087	0.770719	0.645455	0.691598
6	rs1736911	0	29813751	A	G	1082	rs1736911_A	12832.9	12829.2	0.0167883	0.051627	0.0684062	0.228327	0.196513	0.0932115
6	rs9258213	0	29814670	G	A	1083	rs9258213_G	12831.7	12828.3	0.0202675	0.0389925	0.0776416	0.0520667	0.0927105	0.0500537
6	rs929160	0	29814772	T	A	1084	rs929160_T	12825.9	12823.5	0.0351421	0.0512974	0.0938414	0.00993807	0.258123	0.324269
6	rs1633096	0	29815246	A	C	1085	rs1633096_A	12796.3	12789.4	0.00285653	0.00772411	0.0192281	0.00140266	0.0720024	0.101995
6	rs2523388	0	29815683	A	G	1086	rs2523388_A	12832.3	12833.1	0.274564	0.290761	0.506032	0.25547	0.613214	0.577801
6	rs9258218	0	29816007	A	G	1087	rs9258218_A	12830.1	12822.1	0.00154393	0.00764797	0.00918249	0.00899197	0.0455791	0.0338151
6	rs1610603	0	29816201	A	G	1088	rs1610603_A	12831.7	12830.6	0.0790994	0.142695	0.226339	0.438703	0.252045	0.138405
6	rs2743951	0	29817213	A	G	1089	rs2743951_A	12832.9	12833.7	0.273322	0.316395	0.551385	0.283087	0.667049	0.637376
6	rs2517938	0	29817819	G	A	1090	rs2517938_G	12827.4	12828.7	0.414485	0.177689	0.278615	0.259779	0.236192	0.374519
6	rs730858	0	29818607	A	G	1091	rs730858_A	12815.9	12815.9	0.155494	0.040904	0.0863069	0.0771476	0.0800057	0.140825
6	rs4713240	0	29818705	G	A	1092	rs4713240_G	12815.7	12816.3	0.237584	0.0635373	0.297313	0.0744915	0.355874	0.451087
6	rs1610613	0	29818942	A	G	1093	rs1610613_A	12832.3	12831.3	0.0814514	0.145708	0.230401	0.446122	0.257342	0.141907
6	rs9258220	0	29819020	A	G	1094	rs9258220_A	12832.9	12829.6	0.0220924	0.0422752	0.0831349	0.0568104	0.100271	0.054721
6	rs2523386	0	29819726	A	G	1095	rs2523386_A	12832.3	12833.2	0.301746	0.100789	0.1765	0.17989	0.226224	0.326407
6	rs2844846	0	29820015	A	T	1096	rs2844846_A	12824.6	12826.6	0.995065	0.886054	0.732349	0.791489	0.622951	0.668537
6	rs9258224	0	29820235	A	G	1097	rs9258224_A	12832.9	12825.5	0.0021936	0.00943137	0.0100132	0.0109204	0.105355	0.0990221
6	rs2844845	0	29820738	A	T	1098	rs2844845_A	12832.9	12833.4	0.216201	0.0597805	0.113376	0.118603	0.155622	0.255517
6	rs2072894	0	29821015	A	G	1099	rs2072894_A	12832.3	12825.4	0.0029175	0.0157378	0.0153028	0.0200891	0.117038	0.0998195
6	rs1737087	0	29821747	A	G	1100	rs1737087_A	12796.6	12795	0.058603	0.115041	0.187291	0.380391	0.212924	0.114467
6	rs1737086	0	29822392	A	C	1101	rs1737086_A	12780.7	12774.4	0.00404953	0.0017086	0.0068855	0.000469081	0.0335528	0.0779284
6	rs6901686	0	29823700	A	G	1102	rs6901686_A	12776.7	12770.3	0.00376785	0.0190282	0.0143185	0.0190222	0.10855	0.0938506
6	rs1633086	0	29823741	A	G	1103	rs1633086_A	12832.9	12827.7	0.007173	0.00276748	0.010313	0.000791138	0.0463354	0.105594
6	rs1633085	0	29823976	A	G	1104	rs1633085_A	12832.9	12834.8	0.844981	0.533016	0.926367	0.27898	0.979058	0.69457
6	rs1737084	0	29825318	A	T	1105	rs1737084_A	12832.3	12831.3	0.0848309	0.153886	0.240229	0.457478	0.264532	0.146744
6	rs733841	0	29825959	A	G	1106	rs733841_A	12821.6	12820.7	0.0906511	0.16183	0.248817	0.471688	0.276984	0.154097
6	rs1610735	0	29826498	C	A	1107	rs1610735_C	12772.8	12772.9	0.162543	0.198797	0.258997	0.0552339	0.664741	0.79984
6	rs4713243	0	29828940	G	C	1108	rs4713243_G	12832.9	12819.6	9.0755e-05	5.94693e-05	0.000617142	0.000108279	0.00590824	0.00838099
6	rs2394164	0	29829376	G	C	1109	rs2394164_G	12830.1	12825.8	0.0121437	0.00275891	0.0206802	0.00382708	0.0309269	0.0478092
6	rs9258253	0	29829511	C	A	1110	rs9258253_C	12832.9	12833.3	0.208867	0.379002	0.440961	0.46091	0.915361	0.707725
6	rs9391630	0	29830494	G	A	1111	rs9391630_G	12832.9	12833.6	0.260633	0.0769361	0.344634	0.0704744	0.274426	0.383151
6	rs9258260	0	29831140	A	G	1112	rs9258260_A	12832.9	12827.9	0.00834626	0.0364331	0.0317342	0.0424793	0.205448	0.180159
6	rs1633070	0	29832126	A	G	1113	rs1633070_A	12832.9	12832.1	0.0936995	0.166728	0.253393	0.478285	0.281013	0.158702
6	rs1737079	0	29832724	G	A	1114	rs1737079_G	12832.9	12832.1	0.0955706	0.167776	0.258011	0.48684	0.286849	0.161474
6	rs1737078	0	29832918	A	C	1115	rs1737078_A	12818.5	12813.1	0.00664758	0.00262262	0.00902536	0.000680702	0.0426427	0.0991564
6	rs1737076	0	29833300	G	A	1116	rs1737076_G	12831.7	12827.1	0.0101705	0.00381859	0.0122882	0.00101377	0.05507	0.123164
6	rs9258266	0	29833431	A	G	1117	rs9258266_A	12832.9	12833.1	0.185696	0.393828	0.437273	0.51235	0.673908	0.470402
6	rs1633063	0	29834025	A	G	1118	rs1633063_A	12827.4	12820.8	0.00342028	0.00879861	0.0160286	0.000443913	0.0655374	0.0569088
6	rs6935107	0	29834148	A	G	1119	rs6935107_A	12832.3	12828.7	0.0178824	0.0359427	0.0396209	0.0123723	0.0228958	0.00584879
6	rs1633059	0	29834529	G	A	1120	rs1633059_G	12830.1	12830	0.144612	0.0535011	0.137628	0.0219129	0.205463	0.337245
6	rs1610628	0	29836188	C	A	1121	rs1610628_C	12832.9	12832.1	0.0936875	0.164179	0.25334	0.478365	0.281352	0.157901
6	rs9500976	0	29838369	G	A	1122	rs9500976_G	12832.9	12831.5	0.0654241	0.221813	0.17211	0.143172	0.125676	0.0737223
6	rs9258275	0	29838483	G	A	1123	rs9258275_G	12832.9	12819.5	8.58601e-05	5.73018e-05	0.000593171	9.96682e-05	0.00578335	0.00824276
6	rs1737070	0	29838525	C	A	1124	rs1737070_C	12832.9	12832	0.0895108	0.157681	0.247038	0.469501	0.276208	0.154424
6	rs1737069	0	29838709	A	G	1125	rs1737069_A	12832.9	12834.8	0.777859	0.893449	0.700506	0.492174	0.87784	0.696013
6	rs1737064	0	29839242	C	A	1126	rs1737064_C	12832.9	12831.9	0.0858752	0.151866	0.235388	0.450994	0.262976	0.145679
6	rs7759474	0	29839614	A	G	1127	rs7759474_A	12832.9	12832.8	0.152416	0.0331309	0.184981	0.0383871	0.237606	0.311503
6	rs1611285	0	29839766	G	A	1128	rs1611285_G	12832.9	12832.1	0.0952798	0.0220321	0.0447994	0.0404597	0.0426856	0.0803777
6	rs1626392	0	29840223	A	G	1129	rs1626392_A	12832.9	12834.6	0.617771	0.630275	0.775799	0.972169	0.992571	0.821468
6	rs1625636	0	29840281	A	G	1130	rs1625636_A	12832.9	12831.8	0.0768928	0.137007	0.214049	0.419128	0.239954	0.131782
6	rs1633043	0	29840373	A	G	1131	rs1633043_A	12832.9	12829	0.014868	0.0480798	0.0649455	0.21999	0.19175	0.0937679
6	rs422343	0	29840409	A	G	1132	rs422343_A	12832.9	12833.7	0.269854	0.0733789	0.11976	0.144371	0.179354	0.27504
6	rs1737060	0	29840948	G	C	1133	rs1737060_G	12832.9	12831.7	0.0739592	0.129627	0.191603	0.380735	0.216958	0.119992
6	rs1633041	0	29841202	A	G	1134	rs1633041_A	12832.3	12822.1	0.000471334	0.00252224	0.0164293	0.00108483	0.0495381	0.0973914
6	rs2735048	0	29841680	A	G	1135	rs2735048_A	12826.1	12824	0.0440115	0.0583719	0.193034	0.0561643	0.204759	0.236816
6	rs2735046	0	29842077	A	G	1136	rs2735046_A	12832.9	12828.2	0.00981669	0.0226895	0.0685205	0.0295585	0.0865335	0.101444
6	rs12660712	0	29842613	A	C	1137	rs12660712_A	12832.9	12828	0.00866104	0.0474484	0.020542	0.0726623	0.019315	0.0170294
6	rs1737049	0	29843083	G	A	1138	rs1737049_G	12803.8	12797.6	0.00409628	0.0109678	0.0654829	0.00461134	0.0749134	0.148891
6	rs9258294	0	29843638	A	G	1139	rs9258294_A	12832.9	12833.4	0.221588	0.309314	0.309106	0.37176	0.355223	0.434381
6	rs1737043	0	29844026	A	G	1140	rs1737043_A	12832.3	12834.2	0.805958	0.81414	0.99763	0.52989	0.980468	0.811742
6	rs1737041	0	29844208	A	C	1141	rs1737041_A	12831.7	12821.3	0.000422367	0.00229366	0.0152343	0.000984987	0.0462413	0.0916376
6	rs11753872	0	29844921	A	C	1142	rs11753872_A	12832.9	12832.2	0.100762	0.249881	0.135931	0.305271	0.833727	0.732905
6	rs6932033	0	29845825	G	A	1143	rs6932033_G	12832.9	12832.5	0.118787	0.288352	0.161289	0.347404	0.904351	0.801622
6	rs1610634	0	29846433	G	A	1144	rs1610634_G	12812.8	12810.6	0.0394804	0.0507912	0.276233	0.0208412	0.24185	0.418537
6	rs1610726	0	29846644	G	C	1145	rs1610726_G	12832.3	12825.6	0.00315799	0.00857847	0.0555396	0.00367723	0.0637471	0.130808
6	rs885940	0	29847036	A	G	1146	rs885940_A	12825.6	12815.6	0.000519926	0.00276414	0.0185664	0.00127393	0.0544585	0.106906
6	rs9258302	0	29849317	G	A	1147	rs9258302_G	12832.3	12831.2	0.0762612	0.160378	0.530276	0.37089	0.503322	0.351322
6	rs1362068	0	29850087	G	A	1148	rs1362068_G	12832.9	12830.3	0.0329768	0.0424379	0.241249	0.0166087	0.20965	0.372934
6	rs1362070	0	29850278	G	A	1149	rs1362070_G	12832.3	12829.8	0.0331432	0.042598	0.241898	0.0166162	0.209503	0.372818
6	rs1633036	0	29850788	G	A	1150	rs1633036_G	12832.9	12828.7	0.012853	0.041088	0.0509736	0.18237	0.162579	0.07405
6	rs9258304	0	29851414	G	A	1151	rs9258304_G	12832.9	12833.1	0.181148	0.354802	0.411641	0.426675	0.884377	0.668099
6	rs1633034	0	29851542	G	A	1152	rs1633034_G	12829	12821	0.0016042	0.0049617	0.0389568	0.0018047	0.0305017	0.0701288
6	rs1633030	0	29853773	G	A	1153	rs1633030_G	12829.5	12822.8	0.00306269	0.0083256	0.0551393	0.00366892	0.063197	0.129773
6	rs1614309	0	29853863	A	G	1154	rs1614309_A	12769	12761.6	0.00216057	0.00608855	0.0411377	0.00228197	0.0461039	0.0997136
6	rs1633021	0	29854848	G	A	1155	rs1633021_G	12832.9	12825.2	0.00187872	0.00724139	0.0436832	0.00258882	0.0989758	0.163853
6	rs2735042	0	29855352	G	A	1156	rs2735042_G	12826.8	12820	0.00296998	0.00810995	0.0531551	0.00348245	0.061397	0.126499
6	rs9258384	0	29861847	A	C	1157	rs9258384_A	12831.1	12832.4	0.384657	0.521802	0.526676	0.608747	0.57031	0.608577
6	rs2743941	0	29863430	A	G	1158	rs2743941_A	12832.9	12834.8	0.718967	0.742576	0.9577	0.749971	0.648875	0.399128
6	rs1737008	0	29866096	A	G	1159	rs1737008_A	12832.3	12830.1	0.0397017	0.103569	0.130334	0.361318	0.312497	0.164591
6	rs1633012	0	29866705	G	C	1160	rs1633012_G	12818.7	12815.5	0.0231239	0.0648161	0.0756134	0.245474	0.225352	0.108413
6	rs1611205	0	29867802	G	A	1161	rs1611205_G	12770.9	12769	0.0481157	0.0554729	0.281883	0.0248946	0.31125	0.508992
6	rs1737004	0	29869190	G	C	1162	rs1737004_G	12819.8	12818.5	0.068625	0.0810467	0.358082	0.035398	0.336241	0.547828
6	rs1610647	0	29870047	G	A	1163	rs1610647_G	12830.1	12827.6	0.0330121	0.0424774	0.241382	0.0167287	0.209984	0.373543
6	rs16895757	0	29870157	A	G	1164	rs16895757_A	12832.9	12830.2	0.0295197	0.0669834	0.0468685	0.0504291	0.238813	0.309337
6	rs1633010	0	29870921	T	A	1165	rs1633010_T	12831.7	12823.7	0.00156638	0.00479619	0.038032	0.00177315	0.0300908	0.0686939
6	rs2523415	0	29871978	A	G	1166	rs2523415_A	12829.5	12825.2	0.0117815	0.0252893	0.0290431	0.00880222	0.0160518	0.00399105
6	rs11758087	0	29872422	A	G	1167	rs11758087_A	12832.9	12832.4	0.111931	0.277943	0.154656	0.336457	0.88658	0.788947
6	rs1633005	0	29872451	A	G	1168	rs1633005_A	12832.9	12810.9	9.79422e-07	1.73918e-05	0.000392352	1.12061e-06	0.00100406	0.00107748
6	rs11751282	0	29872686	C	A	1169	rs11751282_C	12832.3	12831.8	0.112172	0.279072	0.15538	0.337104	0.889542	0.791489
6	rs2523414	0	29873066	G	A	1170	rs2523414_G	12832.9	12831	0.0474866	0.0794068	0.0757919	0.0394384	0.0923733	0.0320605
6	rs1629068	0	29873270	G	A	1171	rs1629068_G	12832.9	12823.2	0.000617223	0.00319065	0.0200797	0.00141119	0.059155	0.114282
6	rs1736991	0	29874905	C	G	1172	rs1736991_C	12829.5	12821.3	0.00133811	0.00419113	0.0342058	0.00152156	0.0268874	0.0624237
6	rs9258437	0	29875590	A	G	1173	rs9258437_A	12832.9	12834.8	0.739699	0.809389	0.917137	0.895221	0.809207	0.756236
6	rs3873243	0	29875604	A	C	1174	rs3873243_A	12832.9	12834.6	0.623491	0.860998	0.644248	0.928799	0.843667	0.961674
6	rs7741100	0	29876102	A	C	1175	rs7741100_A	12832.9	12833.4	0.228661	0.311715	0.311555	0.379178	0.357809	0.439588
6	rs11751333	0	29876116	A	G	1176	rs11751333_A	12832.9	12832.6	0.130906	0.338472	0.20125	0.451056	0.983382	0.868136
6	rs2517922	0	29876280	C	A	1177	rs2517922_C	12830.1	12825.3	0.00917759	0.0199974	0.022788	0.00681202	0.0125879	0.00301176
6	rs1611185	0	29876323	G	A	1178	rs1611185_G	12830.1	12823.2	0.00287912	0.00629046	0.0265066	0.0052482	0.0632587	0.0940539
6	rs2017525	0	29876482	A	G	1179	rs2017525_A	12832.9	12834.8	0.767737	0.68894	0.27849	0.532444	0.745051	0.740227
6	rs885937	0	29877042	T	A	1180	rs885937_T	12830.1	12827.6	0.0343312	0.0439007	0.247495	0.0175415	0.216029	0.383353
6	rs3891160	0	29877126	G	C	1181	rs3891160_G	12809.8	12811.6	0.613511	0.882704	0.582672	0.976252	0.319398	0.392608
6	rs9468626	0	29877225	A	G	1182	rs9468626_A	12832.3	12827.3	0.00824981	0.0461336	0.0196953	0.0704049	0.018642	0.0164574
6	rs1632996	0	29877486	T	A	1183	rs1632996_T	12832.3	12829.9	0.0358799	0.0459937	0.255256	0.0181799	0.221504	0.390504
6	rs1736982	0	29877500	A	G	1184	rs1736982_A	12832.9	12834.9	0.900315	0.91321	0.880997	0.627875	0.908295	0.70169
6	rs4281004	0	29877536	G	A	1185	rs4281004_G	12826.7	12825.6	0.0788187	0.219018	0.126819	0.289773	0.82942	0.744746
6	rs1632995	0	29877600	T	A	1186	rs1632995_T	12832.3	12829.8	0.0331432	0.0425985	0.2419	0.0167189	0.21038	0.374529
6	rs1736981	0	29878301	A	G	1187	rs1736981_A	12832.9	12834.9	0.900315	0.91321	0.880997	0.627875	0.908295	0.70169
6	rs1632988	0	29880374	A	G	1188	rs1632988_A	12830.1	12821	0.000848846	0.00440755	0.0264316	0.00214517	0.083125	0.144879
6	rs1632987	0	29880528	G	C	1189	rs1632987_G	12832.3	12822.4	0.00055177	0.0029126	0.0187899	0.00127435	0.0549403	0.107868
6	rs2394173	0	29881137	A	G	1190	rs2394173_A	12832.9	12832.9	1	1	1	1	1	1
6	rs1632984	0	29881371	A	T	1191	rs1632984_A	12832.3	12831.3	0.0818013	0.196789	0.217671	0.497571	0.412264	0.24046
6	rs1632983	0	29881488	A	G	1192	rs1632983_A	12832.3	12824.2	0.00150643	0.00464246	0.0371296	0.00171508	0.0293382	0.0673732
6	rs9258447	0	29881831	A	G	1193	rs9258447_A	12832.9	12834.7	0.634086	0.865569	0.632957	0.913223	0.829044	0.950601
6	rs1736976	0	29881978	G	A	1194	rs1736976_G	12830.1	12827.7	0.034652	0.0524206	0.272263	0.0224642	0.226773	0.381513
6	rs11751820	0	29882166	A	G	1195	rs11751820_A	12831.7	12833.5	0.601989	0.872666	0.568897	0.989067	0.320488	0.402848
6	rs11757182	0	29883504	C	A	1196	rs11757182_C	12832.9	12832.5	0.118787	0.288352	0.161289	0.347404	0.904351	0.801622
6	rs2523409	0	29883641	G	A	1197	rs2523409_G	12822.2	12820.7	0.0628409	0.0845908	0.255756	0.0896459	0.229772	0.257249
6	rs1736971	0	29884301	A	C	1198	rs1736971_A	12832.9	12822.8	0.000497392	0.00264769	0.0173387	0.00115842	0.0515942	0.102003
6	rs1736969	0	29884369	A	T	1199	rs1736969_A	12832.9	12822.8	0.000512081	0.0027026	0.0176286	0.00118658	0.0523716	0.103401
6	rs4098859	0	29885178	G	A	1200	rs4098859_G	12831.7	12831.3	0.119292	0.289342	0.161933	0.348413	0.905624	0.802871
6	rs1632971	0	29885890	A	G	1201	rs1632971_A	12832.9	12831.8	0.0767872	0.188564	0.209195	0.483237	0.398893	0.232005
6	rs9357086	0	29886008	C	G	1202	rs9357086_C	12832.9	12831.1	0.0516776	0.0148637	0.104645	0.0186231	0.0944611	0.141147
6	rs2523408	0	29886088	C	A	1203	rs2523408_C	12832.9	12829.2	0.0172761	0.0310344	0.156102	0.013819	0.327772	0.513242
6	rs9295820	0	29886480	C	G	1204	rs9295820_C	12826.2	12827.9	0.560847	0.41706	0.497709	0.357579	0.591754	0.689533
6	rs1610663	0	29886605	A	G	1205	rs1610663_A	12832.3	12828.7	0.0174117	0.0312095	0.156721	0.0138977	0.328265	0.51392
6	rs1610699	0	29886966	C	A	1206	rs1610699_C	12807.5	12804.1	0.0199582	0.0367638	0.177668	0.0169935	0.366388	0.560326
6	rs1610669	0	29888072	A	T	1207	rs1610669_A	12772.7	12770	0.0292055	0.0377837	0.22536	0.0155676	0.20509	0.366402
6	rs1610707	0	29890027	A	C	1208	rs1610707_A	12830	12821.1	0.000980316	0.00405836	0.00961121	0.00140778	0.0699391	0.129203
6	rs11753629	0	29890310	A	G	1209	rs11753629_A	12832.9	12832.3	0.107125	0.325034	0.389898	0.538901	0.525123	0.472768
6	rs1736959	0	29890449	A	G	1210	rs1736959_A	12766.3	12754.9	0.0002611	0.00162883	0.0119864	0.000777025	0.0423087	0.0825701
6	rs1633105	0	29891361	G	A	1211	rs1633105_G	12832.9	12830.4	0.0333102	0.0380435	0.115392	0.0113025	0.19415	0.337299
6	rs1619379	0	29893214	A	G	1212	rs1619379_A	12832.3	12833.3	0.326642	0.301102	0.805617	0.184559	0.564435	0.793225
6	rs2735028	0	29893517	A	G	1213	rs2735028_A	12832.3	12829.7	0.0316309	0.0408808	0.183537	0.0151997	0.20417	0.384997
6	rs1736951	0	29893755	A	G	1214	rs1736951_A	12832.3	12829.6	0.0291853	0.038103	0.173968	0.0140288	0.193811	0.368848
6	rs2743933	0	29894199	G	A	1215	rs2743933_G	12832.3	12832.7	0.200076	0.0115385	0.0351085	0.0085341	0.0613435	0.06235
6	rs2743931	0	29895051	G	A	1216	rs2743931_G	12832.9	12831.8	0.0767352	0.18706	0.206737	0.479729	0.396102	0.22938
6	rs2394177	0	29895348	G	A	1217	rs2394177_G	12832.9	12834.5	0.539484	0.779996	0.88774	0.980906	0.888532	0.93726
6	rs3873245	0	29896516	A	G	1218	rs3873245_A	12832.9	12829.9	0.0257613	0.0548409	0.035932	0.0390581	0.194222	0.25031
6	rs1610677	0	29897150	G	A	1219	rs1610677_G	12832.3	12832.5	0.174084	0.171866	0.339366	0.0911118	0.255157	0.413191
6	rs1611149	0	29897978	A	G	1220	rs1611149_A	12832.9	12834.5	0.514828	0.379699	0.744785	0.194879	0.51955	0.761661
6	rs1632949	0	29901703	G	A	1221	rs1632949_G	12812.8	12811.7	0.0773059	0.110751	0.347666	0.0766949	0.259517	0.410953
6	rs1632948	0	29902028	G	A	1222	rs1632948_G	12821.8	12823.4	0.514152	0.379311	0.744894	0.196744	0.520831	0.76244
6	rs1736936	0	29902296	A	G	1223	rs1736936_A	12832.3	12832.4	0.169945	0.163357	0.320025	0.0840256	0.238355	0.386879
6	rs1736935	0	29902422	G	A	1224	rs1736935_G	12785.3	12786.8	0.499276	0.37289	0.72724	0.183924	0.501857	0.738113
6	rs3115630	0	29902480	A	G	1225	rs3115630_A	12830.1	12824.6	0.00598269	0.0269624	0.0416032	0.174203	0.256028	0.129219
6	rs1632942	0	29904619	G	A	1226	rs1632942_G	12823.4	12825.1	0.55119	0.411321	0.799719	0.218384	0.557786	0.793404
6	rs1632933	0	29905912	A	G	1227	rs1632933_A	12832.3	12832.5	0.178975	0.177754	0.349217	0.0944469	0.262541	0.423187
6	rs1233330	0	29907082	A	G	1228	rs1233330_A	12832.9	12831.7	0.0752304	0.184173	0.201712	0.469752	0.385909	0.224025
6	rs1610682	0	29909303	G	A	1229	rs1610682_G	12832.9	12809.4	4.54331e-07	1.17763e-05	0.000227734	1.25717e-06	0.000706593	0.000995435
6	rs2517892	0	29909453	G	A	1230	rs2517892_G	12754.9	12741.8	9.74305e-05	0.00233092	0.00249599	0.00238451	0.0212942	0.00826928
6	rs2735020	0	29910964	A	C	1231	rs2735020_A	12832.9	12829.4	0.0186977	0.0486503	0.0504962	0.0215055	0.0763938	0.0196984
6	rs2523790	0	29911629	C	A	1232	rs2523790_C	12830.1	12816.6	8.11454e-05	0.00211574	0.00236711	0.00208527	0.0196785	0.00761082
6	rs16896049	0	29911709	C	G	1233	rs16896049_C	12832.9	12830.8	0.0427452	0.0874203	0.0639948	0.0692789	0.296032	0.379995
6	rs2735018	0	29912388	C	G	1234	rs2735018_C	12828.4	12825.2	0.0224503	0.0492872	0.0478506	0.020659	0.0729561	0.018302
6	rs2394180	0	29913178	G	A	1235	rs2394180_G	12832.9	12831.8	0.0785182	0.268215	0.338197	0.464514	0.456394	0.409112
6	rs2735014	0	29913788	A	C	1236	rs2735014_A	12829.5	12822.5	0.00256288	0.0248372	0.0340111	0.0286984	0.0672043	0.0212226
6	rs7755504	0	29914012	C	G	1237	rs7755504_C	12832.3	12831.9	0.121286	0.345354	0.169586	0.446346	0.332289	0.304533
6	rs2517887	0	29915372	G	C	1238	rs2517887_G	12832.9	12825.5	0.00219654	0.0217891	0.0299261	0.0252985	0.0602951	0.0186559
6	rs2735005	0	29916443	A	G	1239	rs2735005_A	12755.5	12751.9	0.0179886	0.127631	0.133427	0.120214	0.401821	0.231135
6	rs2735003	0	29916613	C	A	1240	rs2735003_C	12832.9	12826.8	0.00455782	0.0391726	0.0510048	0.0448341	0.0964067	0.0326779
6	rs2523776	0	29917173	C	A	1241	rs2523776_C	12832.9	12829.6	0.0209612	0.0505266	0.051162	0.021637	0.0760126	0.0187461
6	rs4959033	0	29917283	C	A	1242	rs4959033_C	12832.9	12834.9	0.859887	0.942274	0.936706	0.824682	0.847118	0.864644
6	rs1611133	0	29917361	A	G	1243	rs1611133_A	12832.9	12810.5	7.69079e-07	1.82013e-05	0.000326562	2.17892e-06	0.0010633	0.00144803
6	rs3900925	0	29917935	A	G	1244	rs3900925_A	12832.9	12831.2	0.0537089	0.106899	0.0784052	0.0844852	0.342539	0.437363
6	rs4607472	0	29918522	G	A	1245	rs4607472_G	12832.9	12833.9	0.329416	0.526548	0.891556	0.756062	0.852987	0.817893
6	rs2844827	0	29919216	G	A	1246	rs2844827_G	12832.3	12822.7	0.000646666	0.00558856	0.0111164	0.00416902	0.0475244	0.0207089
6	rs4084096	0	29919847	A	C	1247	rs4084096_A	12832.9	12830.1	0.0287162	0.0882637	0.153264	0.124555	0.376019	0.418231
6	rs2734994	0	29920009	A	G	1248	rs2734994_A	12832.9	12829.5	0.0200893	0.0524804	0.055627	0.0236467	0.0820284	0.0208291
6	rs2734990	0	29920484	A	T	1249	rs2734990_A	12832.9	12823.2	0.000636633	0.0055328	0.0110179	0.00412092	0.0470303	0.0204654
6	rs2523767	0	29920786	G	A	1250	rs2523767_G	12832.9	12823.2	0.000636633	0.0055328	0.0110179	0.00412092	0.0470303	0.0204654
6	rs9258557	0	29921921	A	G	1251	rs9258557_A	12832.9	12829.5	0.0200893	0.0524804	0.055627	0.0236467	0.0820284	0.0208291
6	rs4081563	0	29922343	G	A	1252	rs4081563_G	12832.9	12830.8	0.0427452	0.0874203	0.0639948	0.0692789	0.296032	0.379995
6	rs3115629	0	29923692	G	A	1253	rs3115629_G	12824.6	12823.8	0.0931658	0.210742	0.240977	0.538967	0.440139	0.258184
6	rs2394186	0	29924400	G	A	1254	rs2394186_G	12832.9	12834.3	0.440699	0.351084	0.657003	0.123402	0.53956	0.886687
6	rs2523765	0	29925085	A	T	1255	rs2523765_A	12832.9	12810.9	9.7096e-07	2.23035e-05	0.000628729	1.97239e-05	0.00275574	0.00162552
6	rs9380146	0	29925223	A	G	1256	rs9380146_A	12832.9	12830.5	0.0361727	0.010308	0.0843813	0.0129592	0.0638102	0.119148
6	rs11759549	0	29925902	C	G	1257	rs11759549_C	12832.9	12832.4	0.112315	0.334935	0.162186	0.43261	0.318566	0.292101
6	rs2734986	0	29926547	G	A	1258	rs2734986_G	12832.9	12813.8	4.38587e-06	9.13857e-05	0.00149765	1.27953e-05	0.00500005	0.00463149
6	rs2734985	0	29926641	G	A	1259	rs2734985_G	12832.9	12826.2	0.00325897	0.00985156	0.069636	0.0033782	0.0622602	0.0512284
6	rs2517868	0	29927317	A	C	1260	rs2517868_A	12832.3	12826.8	0.00604978	0.0191009	0.110278	0.00708069	0.0942338	0.0731342
6	rs2508050	0	29928026	G	A	1261	rs2508050_G	12832.9	12832	0.0882899	0.014196	0.0319917	0.0152765	0.0581946	0.0745179
6	rs3115627	0	29928257	G	A	1262	rs3115627_G	12826.8	12824.8	0.0448998	0.0575455	0.207534	0.0670709	0.208541	0.260028
6	rs5013093	0	29928565	A	G	1263	rs5013093_A	12832.3	12825.9	0.00372688	0.0115554	0.078222	0.00406473	0.0715091	0.0599435
6	rs2523756	0	29928696	G	A	1264	rs2523756_G	12832.9	12834.1	0.365915	0.302206	0.534669	0.161618	0.463532	0.666702
6	rs2734984	0	29928810	G	A	1265	rs2734984_G	12826.8	12820.4	0.00383318	0.0117866	0.0794866	0.00419004	0.0730992	0.0613957
6	rs9258631	0	29929272	C	A	1266	rs9258631_C	12832.3	12832.5	0.183229	0.332128	0.380842	0.322306	0.545814	0.285581
6	rs2734982	0	29929546	A	C	1267	rs2734982_A	12813.2	12808.1	0.00796896	0.00219496	0.0253136	0.0020302	0.0300639	0.0433721
6	rs2734980	0	29929875	A	G	1268	rs2734980_A	12832.9	12826.5	0.00378121	0.0117315	0.079095	0.00410276	0.0719406	0.0603758
6	rs2517862	0	29929916	A	G	1269	rs2517862_A	12828.4	12809.6	5.24555e-06	0.000112263	0.00191065	1.8326e-05	0.00624822	0.00596878
6	rs2517861	0	29929961	A	G	1270	rs2517861_A	12827.4	12820.5	0.00285047	0.00915384	0.0655001	0.00310349	0.0582098	0.0488539
6	rs2975033	0	29930240	A	G	1271	rs2975033_A	12832.9	12828.1	0.00931343	0.00243679	0.0290321	0.00253567	0.0352324	0.0495008
6	rs9258651	0	29930334	A	G	1272	rs9258651_A	12832.3	12833.5	0.370503	0.305433	0.539014	0.16349	0.467386	0.670093
6	rs3094175	0	29930902	T	A	1273	rs3094175_T	12802.4	12803.6	0.380634	0.31061	0.558077	0.16494	0.480797	0.683963
6	rs2428510	0	29931006	A	G	1274	rs2428510_A	12832.3	12833.5	0.370503	0.309242	0.550818	0.168858	0.482765	0.688371
6	rs3128909	0	29931550	A	T	1275	rs3128909_A	12832.9	12830.3	0.0318904	0.0975678	0.109301	0.302998	0.235977	0.153902
6	rs3132726	0	29931585	A	G	1276	rs3132726_A	12829.5	12829.9	0.200459	0.315712	0.440234	0.618449	0.521125	0.394492
6	rs6919513	0	29931973	A	G	1277	rs6919513_A	12832.3	12833.5	0.370503	0.305433	0.539014	0.16349	0.467386	0.670093
6	rs9258679	0	29932038	G	A	1278	rs9258679_G	12832.9	12834.1	0.369981	0.305053	0.538517	0.163316	0.467303	0.669977
6	rs2517840	0	29934071	A	G	1279	rs2517840_A	12832.3	12827.4	0.00876307	0.00227861	0.0265956	0.00226145	0.0326485	0.0459722
6	rs1611697	0	29935364	C	A	1280	rs1611697_C	12832.9	12830.3	0.0313344	0.000579771	0.00371855	0.000444045	0.00544453	0.00527056
6	rs9258739	0	29935642	A	G	1281	rs9258739_A	12832.9	12825.9	0.00275744	0.0262248	0.0421412	0.0291866	0.132196	0.0620437
6	rs1611699	0	29935732	T	A	1282	rs1611699_T	12832.9	12834	0.357869	0.295031	0.524991	0.157203	0.45443	0.653691
6	rs9258740	0	29935878	A	G	1283	rs9258740_A	12832.3	12830.3	0.0465474	0.15354	0.293124	0.190809	0.347138	0.161395
6	rs3094657	0	29936289	G	C	1284	rs3094657_G	12814.2	12814.3	0.173426	0.273583	0.392755	0.571926	0.47959	0.359067
6	rs2523822	0	29936639	G	A	1285	rs2523822_G	12832.9	12828	0.0086357	0.00224804	0.0263338	0.00223295	0.0322836	0.0454386
6	rs1611710	0	29936895	A	G	1286	rs1611710_A	12831.7	12832.9	0.362736	0.296546	0.527225	0.157775	0.456649	0.657043
6	rs1611715	0	29937461	C	A	1287	rs1611715_C	12832.3	12830.2	0.0424657	0.0548028	0.197595	0.0624239	0.194992	0.245873
6	rs1611717	0	29937556	G	A	1288	rs1611717_G	12830.1	12831.4	0.389105	0.320838	0.561877	0.17408	0.488535	0.694751
6	rs9258762	0	29937634	A	G	1289	rs9258762_A	12832.9	12834.5	0.55028	0.73152	0.708849	0.696236	0.896889	0.860261
6	rs3094169	0	29937965	A	G	1290	rs3094169_A	12832.9	12830.3	0.0318904	0.0975678	0.109301	0.302998	0.235977	0.153902
6	rs7760172	0	29938053	G	A	1291	rs7760172_G	12831.7	12830.9	0.0916627	0.202946	0.0924651	0.270226	0.26862	0.254495
6	rs9258766	0	29938390	A	G	1292	rs9258766_A	12832.3	12825.5	0.00304564	0.0281662	0.0451299	0.031649	0.141115	0.0668077
6	rs9258771	0	29938631	G	A	1293	rs9258771_G	12832.9	12826	0.00291111	0.0273924	0.0440243	0.0307849	0.137871	0.0649278
6	rs1611732	0	29938987	A	G	1294	rs1611732_A	12832.9	12834.1	0.369981	0.305053	0.538517	0.163316	0.467303	0.669977
6	rs765649	0	29939037	A	T	1295	rs765649_A	12832.9	12834	0.353718	0.290589	0.519131	0.15361	0.445054	0.645294
6	rs1611737	0	29939550	G	C	1296	rs1611737_G	12829.5	12830.8	0.377096	0.31268	0.549749	0.168046	0.476023	0.680301
6	rs2524035	0	29940311	A	G	1297	rs2524035_A	12832.9	12834.3	0.44997	0.5769	0.763072	0.940282	0.83102	0.600527
6	rs7760545	0	29941451	A	C	1298	rs7760545_A	12827.4	12826.3	0.0797224	0.0831404	0.0947633	0.0397948	0.0111321	0.0119139
6	rs3094165	0	29941520	A	G	1299	rs3094165_A	12827.4	12829.3	0.851392	0.911353	0.894468	0.615032	0.77195	0.774878
6	rs2734974	0	29941758	G	A	1300	rs2734974_G	12830.1	12819.7	0.000433966	0.0025753	0.0151826	0.000612596	0.0459974	0.0651825
6	rs2734973	0	29941927	A	G	1301	rs2734973_A	12832.9	12833.7	0.280965	0.0640787	0.115806	0.0709076	0.0972602	0.165863
6	rs2734971	0	29942428	A	G	1302	rs2734971_A	12732	12731.1	0.0855248	0.0319936	0.111878	0.00989202	0.0765701	0.162758
6	rs3094161	0	29943052	A	G	1303	rs3094161_A	12774.5	12774.8	0.182087	0.287881	0.252382	0.146753	0.3938	0.528243
6	rs3132721	0	29943612	G	A	1304	rs3132721_G	12689.2	12690.3	0.338221	0.489194	0.456832	0.294423	0.637236	0.800205
6	rs3094159	0	29943813	G	A	1305	rs3094159_G	12824.6	12824.9	0.188737	0.298337	0.267045	0.158772	0.412584	0.550363
6	rs1611635	0	29944442	A	G	1306	rs1611635_A	12832.9	12813.9	4.69631e-06	9.54431e-05	0.00143757	1.25025e-05	0.00489357	0.00447984
6	rs9258866	0	29944503	A	C	1307	rs9258866_A	12832.9	12833.7	0.275871	0.375548	0.366656	0.443574	0.428019	0.525619
6	rs3132718	0	29944556	A	G	1308	rs3132718_A	12832.3	12832.6	0.190697	0.300895	0.270358	0.161079	0.418971	0.558031
6	rs1611636	0	29944682	C	A	1309	rs1611636_C	12832.9	12833.2	0.19994	0.011697	0.0365286	0.00863704	0.0620778	0.0624301
6	rs9258881	0	29945121	G	A	1310	rs9258881_G	12832.9	12833.2	0.191605	0.30192	0.271267	0.161687	0.420188	0.559507
6	rs886398	0	29947247	A	G	1311	rs886398_A	12815	12813.9	0.0760019	0.0123879	0.0281099	0.0136958	0.051241	0.0656749
6	rs3132714	0	29948627	A	G	1312	rs3132714_A	12832.9	12833.2	0.188879	0.298926	0.268603	0.159899	0.417111	0.555654
6	rs3128888	0	29949335	C	G	1313	rs3128888_C	12831.7	12830.7	0.0811023	0.189573	0.214893	0.495606	0.400033	0.22851
6	rs3132708	0	29949615	A	G	1314	rs3132708_A	12713.3	12715.1	0.66158	0.838404	0.849465	0.614208	0.952195	0.780514
6	rs2523809	0	29957598	A	C	1315	rs2523809_A	12832.9	12833.7	0.275769	0.0627642	0.11377	0.0691898	0.0952721	0.162833
6	rs2734959	0	29957666	G	C	1316	rs2734959_G	12818.5	12820.1	0.540552	0.857123	0.946955	0.856039	0.804487	0.79147
6	rs2523807	0	29958253	G	A	1317	rs2523807_G	12826.8	12825.4	0.0642679	0.00921121	0.0214488	0.0099951	0.0409858	0.0533949
6	rs9259852	0	30004400	G	A	1318	rs9259852_G	12832.3	12833.9	0.540703	0.703621	0.693377	0.700857	0.887225	0.858524
6	rs2524005	0	30007656	A	G	1319	rs2524005_A	12830.1	12820.6	0.000703446	0.00321972	0.0353482	0.000521109	0.0469062	0.0467078
6	rs2734905	0	30012908	C	A	1320	rs2734905_C	12775.1	12767.5	0.00195289	0.000999501	0.0151389	0.000658664	0.00796264	0.00847513
6	rs2860580	0	30014670	A	G	1321	rs2860580_A	12832.9	12826.8	0.00440612	0.0288125	0.119519	0.035848	0.134473	0.0918893
6	rs3094141	0	30017786	A	C	1322	rs3094141_A	12770.3	12769.2	0.0765236	0.172457	0.194323	0.45944	0.372376	0.214396
6	rs3823339	0	30020947	C	G	1323	rs3823339_C	12831.7	12832.7	0.301078	0.390996	0.391813	0.478926	0.457637	0.55123
6	rs2499	0	30021521	A	C	1324	rs2499_A	12826.2	12825.1	0.0761579	0.185932	0.216309	0.494584	0.400776	0.227229
6	rs6921314	0	30022199	A	G	1325	rs6921314_A	12832.9	12834.8	0.75578	0.665715	0.587318	0.99133	0.839912	0.939853
6	rs376646	0	30022356	A	G	1326	rs376646_A	12753.2	12742.4	0.000353683	0.00464849	0.0350457	0.00507631	0.034369	0.0159308
6	rs2735097	0	30023280	A	C	1327	rs2735097_A	12832.9	12826.2	0.00314866	0.00154212	0.0215334	0.000952869	0.0110704	0.0107547
6	rs1632882	0	30024347	A	C	1328	rs1632882_A	12771.2	12762.9	0.0013503	0.00534551	0.0373569	0.00181695	0.0311109	0.0242737
6	rs417162	0	30024484	G	A	1329	rs417162_G	12832.9	12821.2	0.000215921	0.00298653	0.0248509	0.00307747	0.0244636	0.0100507
6	rs1655906	0	30026233	A	T	1330	rs1655906_A	12832.3	12832.9	0.234084	0.521623	0.579212	0.92105	0.649161	0.440871
6	rs2508037	0	30026415	A	G	1331	rs2508037_A	12831.7	12820.2	0.000232636	0.00319582	0.0262692	0.00329009	0.0257924	0.010647
6	rs9260461	0	30027808	A	G	1332	rs9260461_A	12728.6	12728.7	0.177322	0.0147718	0.0356273	0.0131114	0.0228544	0.0400946
6	rs9260491	0	30028368	A	G	1333	rs9260491_A	12794.8	12796.2	0.430469	0.0604827	0.131708	0.0579579	0.0894381	0.142108
6	rs1632874	0	30030102	C	A	1334	rs1632874_C	12806.7	12805.2	0.0615224	0.150812	0.168561	0.409592	0.323303	0.179455
6	rs9260570	0	30030117	A	G	1335	rs9260570_A	12821.1	12822.9	0.615701	0.112311	0.207785	0.0982067	0.149122	0.222507
6	rs16896742	0	30030719	G	A	1336	rs16896742_G	12823.3	12811.8	0.000235436	0.000208649	0.00276702	0.000171385	0.00252453	0.00237412
6	rs3893538	0	30032404	G	A	1337	rs3893538_G	12829	12829.7	0.268934	0.908825	0.928921	0.919895	0.673298	0.374213
6	rs892666	0	30032707	A	G	1338	rs892666_A	12822.3	12823.8	0.490574	0.534202	0.584398	0.339454	0.386814	0.426961
6	rs12665039	0	30032758	G	A	1339	rs12665039_G	12832.9	12823.5	0.0007323	0.00369804	0.00140865	0.00538752	0.00214021	0.00169165
6	rs2523942	0	30033065	C	A	1340	rs2523942_C	12831.7	12833.6	0.751599	0.155722	0.28361	0.14947	0.210795	0.301356
6	rs2517701	0	30033951	A	T	1341	rs2517701_A	12832.9	12825.3	0.00196909	0.00106077	0.01592	0.000843028	0.0108888	0.00997571
6	rs2523937	0	30035200	C	G	1342	rs2523937_C	12832.9	12831.8	0.081252	0.546245	0.394699	0.473812	0.721376	0.548896
6	rs2571400	0	30035701	G	C	1343	rs2571400_G	12801.1	12802.5	0.43085	0.174391	0.427935	0.0822745	0.262606	0.397378
6	rs9260705	0	30037170	A	G	1344	rs9260705_A	12658	12659.9	0.701429	0.8478	0.807571	0.803676	0.881551	0.873877
6	rs2517689	0	30037232	A	G	1345	rs2517689_A	12832.9	12823.6	0.000782764	0.00661243	0.03039	0.00674922	0.0758732	0.0638395
6	rs7739434	0	30038598	G	A	1346	rs7739434_G	12807.6	12808.8	0.358778	0.603068	0.801385	0.888393	0.936236	0.946828
6	rs2571402	0	30040359	T	A	1347	rs2571402_T	12729.2	12708.9	2.31773e-06	6.61813e-05	0.000384814	0.00014737	0.00639805	0.00441161
6	rs9260734	0	30040645	A	G	1348	rs9260734_A	12832.3	12829	0.0218162	0.0935654	0.0840682	0.081115	0.291573	0.184127
6	rs3903160	0	30040876	A	G	1349	rs3903160_A	12831.7	12827.2	0.0106493	0.00278981	0.0300631	0.00336669	0.0489183	0.0640485
6	rs3873283	0	30040979	G	A	1350	rs3873283_G	12828.4	12825	0.0203195	0.0892265	0.0796889	0.07659	0.280514	0.17299
6	rs6457109	0	30041240	G	A	1351	rs6457109_G	12830.1	12831.7	0.516321	0.57036	0.660239	0.67741	0.950367	0.855908
6	rs2844806	0	30041418	G	A	1352	rs2844806_G	12832.9	12834.5	0.530177	0.542667	0.838156	0.301881	0.422741	0.669387
6	rs6457110	0	30041860	T	A	1353	rs6457110_T	12829.5	12826.2	0.0206074	0.0118871	0.0912973	0.0115091	0.0687631	0.0543589
6	rs6914699	0	30042001	G	A	1354	rs6914699_G	12830.1	12826.1	0.0137609	0.00482183	0.0484835	0.00514842	0.0615574	0.0490347
6	rs3893259	0	30042433	A	G	1355	rs3893259_A	12832.9	12828.1	0.00894778	0.0357319	0.0427581	0.216764	0.353831	0.179932
6	rs4713270	0	30042676	A	G	1356	rs4713270_A	12830.1	12827.8	0.0379469	0.0192369	0.126731	0.02536	0.131142	0.166345
6	rs3893464	0	30043229	A	G	1357	rs3893464_A	12832.9	12834.3	0.44381	0.165672	0.532368	0.0554473	0.20284	0.258678
6	rs9260759	0	30043351	A	G	1358	rs9260759_A	12832.9	12834.5	0.557217	0.621334	0.70816	0.504334	0.542359	0.322067
6	rs4959036	0	30044114	C	A	1359	rs4959036_C	12832.9	12827.9	0.00831027	0.0335539	0.040068	0.20661	0.338467	0.17067
6	rs4959037	0	30044286	A	T	1360	rs4959037_A	12832.9	12829.6	0.0210676	0.00761921	0.0613686	0.0120005	0.0998934	0.121891
6	rs12193110	0	30045083	A	G	1361	rs12193110_A	12832.3	12829	0.0208917	0.00756413	0.0610372	0.0118818	0.0991993	0.121072
6	rs12193208	0	30045128	A	C	1362	rs12193208_A	12829.5	12826.4	0.0238525	0.00875705	0.0682995	0.0137931	0.110098	0.133827
6	rs2517673	0	30045221	A	G	1363	rs2517673_A	12772.3	12773.9	0.549784	0.539546	0.907032	0.421851	0.529877	0.680225
6	rs4713274	0	30045472	C	G	1364	rs4713274_C	12830.1	12826.7	0.0196138	0.00784496	0.0682175	0.00786785	0.0656977	0.0893493
6	rs2256539	0	30045719	G	A	1365	rs2256539_G	12829	12831	0.910462	0.440254	0.71252	0.921592	0.834288	0.843517
6	rs2256543	0	30045812	A	G	1366	rs2256543_A	12831.7	12820.7	0.000299862	0.00395381	0.013958	0.00454813	0.0604408	0.0409538
6	rs3202637	0	30045875	G	A	1367	rs3202637_G	12832.3	12832.3	0.151657	0.221697	0.287383	0.65025	0.553064	0.369518
6	rs1061535	0	30045903	A	G	1368	rs1061535_A	12832.9	12826.9	0.00472376	0.0177339	0.0217178	0.111142	0.212704	0.138716
6	rs6457116	0	30046004	A	G	1369	rs6457116_A	12832.9	12833.4	0.220988	0.151707	0.19569	0.0997337	0.123523	0.0490818
6	rs2523971	0	30046237	A	C	1370	rs2523971_A	12832.3	12826.6	0.00559606	0.0218111	0.0487913	0.00567894	0.122178	0.138607
6	rs12195260	0	30046434	A	G	1371	rs12195260_A	12830.1	12828.3	0.0510448	0.0271314	0.164457	0.0352927	0.167494	0.211086
6	rs116810211	0	30046550	A	C	1372	rs116810211_A	12774.8	12771.2	0.0176635	0.0387453	0.096	0.0103821	0.109953	0.13023
6	rs114840911	0	30046637	G	A	1373	rs114840911_G	12832.9	12834.1	0.386159	0.188738	0.181294	0.294928	0.731352	0.646527
6	rs114690890	0	30046756	T	A	1374	rs114690890_T	12829.5	12828.8	0.0951036	0.595335	0.389751	0.625052	0.604421	0.372346
6	rs2523969	0	30046756	T	A	1375	rs2523969_T	12832.9	12832.1	0.0943991	0.588437	0.383741	0.620773	0.600525	0.369518
6	rs115068286	0	30046832	A	C	1376	rs115068286_A	12811.7	12813.6	0.769216	0.804383	0.89372	0.740444	0.940039	0.914379
6	rs114009945	0	30046911	A	G	1377	rs114009945_A	12829.4	12831.4	0.822424	0.756569	0.939265	0.783534	0.969726	0.942639
6	rs2735079	0	30046911	A	G	1378	rs2735079_A	12832.9	12834.8	0.812147	0.761642	0.932733	0.779089	0.973524	0.94681
6	rs114622755	0	30047091	G	C	1379	rs114622755_G	12796.5	12793.2	0.022021	0.0785668	0.0932832	0.37209	0.551618	0.31606
6	rs116608358	0	30047273	A	G	1380	rs116608358_A	12805.3	12802.1	0.0230046	0.0515903	0.12339	0.0139591	0.136092	0.161468
6	rs2523964	0	30047273	A	G	1381	rs2523964_A	12832.9	12829.8	0.0240029	0.0532588	0.127203	0.0144872	0.14105	0.167846
6	rs115178329	0	30047462	A	T	1382	rs115178329_A	12830.1	12827.1	0.0249755	0.0552997	0.131425	0.0152424	0.145869	0.173349
6	rs116119596	0	30047493	A	G	1383	rs116119596_A	12827.7	12828.8	0.349067	0.165135	0.15946	0.26572	0.686624	0.600467
6	rs114059410	0	30047523	A	G	1384	rs114059410_A	12798.5	12795.2	0.0208744	0.0487551	0.114467	0.0123231	0.127094	0.153751
6	rs115385400	0	30047559	A	G	1385	rs115385400_A	12806.5	12806.4	0.145467	0.734279	0.489736	0.795611	0.538781	0.398161
6	rs2523961	0	30047559	A	G	1386	rs2523961_A	12832.9	12832.6	0.132342	0.700331	0.456674	0.755895	0.504149	0.367647
6	rs116761360	0	30047656	A	T	1387	rs116761360_A	12820.9	12822.1	0.385556	0.458277	0.571834	0.985377	0.915149	0.608123
6	rs114555025	0	30047831	A	G	1388	rs114555025_A	12803.4	12805.4	0.858656	0.715274	0.984401	0.828628	0.981135	0.99627
6	rs435766	0	30047831	A	G	1389	rs435766_A	12809.4	12811.3	0.806431	0.763429	0.932054	0.771424	0.965743	0.941817
6	rs116441341	0	30047957	A	C	1390	rs116441341_A	12708.4	12698.1	0.000452902	0.0013694	0.00497292	0.000221518	0.00605449	0.00776434
6	rs115836634	0	30047981	A	G	1391	rs115836634_A	12832.9	12832.1	0.0962423	0.254793	0.146272	0.327681	0.884698	0.806109
6	rs115932477	0	30048239	G	A	1392	rs115932477_G	12805.3	12807.3	0.910592	0.643729	0.949219	0.901056	0.881313	0.910134
6	rs114499818	0	30048351	A	G	1393	rs114499818_A	12831.1	12831.7	0.232235	0.934756	0.653142	0.99601	0.719564	0.563789
6	rs2256902	0	30048351	A	G	1394	rs2256902_A	12831.7	12832.3	0.23116	0.944044	0.66081	0.996226	0.7238	0.567273
6	rs115810639	0	30048467	A	G	1395	rs115810639_A	12734.5	12735.8	0.404881	0.449151	0.565118	0.999444	0.745827	0.635437
6	rs5009448	0	30048467	A	G	1396	rs5009448_A	12832.9	12834.4	0.47535	0.524221	0.633327	0.916404	0.820729	0.704451
6	rs115500464	0	30048483	A	C	1397	rs115500464_A	12812	12812.8	0.275445	0.173786	0.200946	0.0862296	0.185137	0.204793
6	rs114204022	0	30048658	A	G	1398	rs114204022_A	12832.3	12829.2	0.0233446	0.0579544	0.142231	0.0127404	0.111832	0.126608
6	rs116535843	0	30048676	C	G	1399	rs116535843_C	12832.9	12833.9	0.327167	0.22096	0.249631	0.10782	0.221622	0.244149
6	rs115538144	0	30048729	C	A	1400	rs115538144_C	12832.3	12834.2	0.805253	0.728111	0.963838	0.778747	0.98003	0.961339
6	rs2256919	0	30048729	C	A	1401	rs2256919_C	12832.9	12834.9	0.954434	0.582212	0.882927	0.932946	0.862284	0.881831
6	rs115509554	0	30048793	A	G	1402	rs115509554_A	12832.9	12830.6	0.0389402	0.0869734	0.193736	0.0257599	0.212755	0.24997
6	rs115592739	0	30048922	G	A	1403	rs115592739_G	12832.9	12830.9	0.0460938	0.0225579	0.144015	0.0311492	0.154922	0.189027
6	rs116454582	0	30048990	A	G	1404	rs116454582_A	12829.4	12827.8	0.0571765	0.116313	0.0828955	0.0847132	0.343423	0.432003
6	rs116354912	0	30049043	G	A	1405	rs116354912_G	12830	12831.6	0.523366	0.682467	0.670107	0.665005	0.938316	0.813472
6	rs114886428	0	30049163	A	G	1406	rs114886428_A	12821.3	12818.2	0.0243813	0.0593257	0.138717	0.0155999	0.152561	0.179538
6	rs116159284	0	30049410	A	G	1407	rs116159284_A	12831.1	12827.8	0.0201815	0.0071531	0.0680383	0.00837208	0.0719406	0.0952392
6	rs9295825	0	30049410	A	G	1408	rs9295825_A	12804.4	12800.9	0.0192402	0.00695294	0.0663685	0.00807945	0.0696292	0.0919026
6	rs2523948	0	30049836	C	A	1409	rs2523948_C	12777.7	12779.7	0.955735	0.476668	0.747314	0.929874	0.728435	0.760945
6	rs112130743	0	30049852	A	C	1410	rs112130743_A	12829.5	12828.7	0.0909085	0.502969	0.322928	0.583677	0.677678	0.426488
6	rs116097111	0	30049922	A	G	1411	rs116097111_A	12826.8	12818.7	0.00149576	0.00665452	0.0297125	0.0134176	0.0888802	0.0610414
6	rs2523946	0	30049922	A	G	1412	rs2523946_A	12829	12821	0.00156077	0.00696999	0.0309286	0.0139763	0.0921491	0.0638759
6	rs114764570	0	30050012	G	C	1413	rs114764570_G	12832.3	12829.9	0.0368144	0.0166018	0.11985	0.0243548	0.130079	0.161941
6	rs3823355	0	30050062	A	G	1414	rs3823355_A	12832.3	12829.9	0.0353384	0.0155321	0.115916	0.0235592	0.126515	0.159169
6	rs116653299	0	30050105	C	A	1415	rs116653299_C	12829.5	12821.2	0.00130435	0.00596811	0.0270811	0.0120196	0.0814823	0.0552806
6	rs2844804	0	30050105	C	A	1416	rs2844804_C	12831.1	12823.5	0.00185928	0.00806526	0.0350444	0.0158873	0.100247	0.0696973
6	rs114282430	0	30050170	A	C	1417	rs114282430_A	12831.7	12832.9	0.376641	0.40381	0.515756	0.98971	0.864683	0.557568
6	rs116436488	0	30050184	A	G	1418	rs116436488_A	12832.9	12830.7	0.0395459	0.0178645	0.126065	0.0264894	0.139006	0.17253
6	rs116160663	0	30050821	A	C	1419	rs116160663_A	12832.3	12830.3	0.0441298	0.0206634	0.140982	0.0299548	0.152419	0.188167
6	rs2232238	0	30050836	G	A	1420	rs2232238_G	12832.9	12831.8	0.0790091	0.452564	0.284898	0.534228	0.622527	0.38469
6	rs114492165	0	30050845	G	A	1421	rs114492165_G	12832.9	12833.8	0.289727	0.385522	0.391585	0.474393	0.442512	0.548844
6	rs115066129	0	30050906	C	A	1422	rs115066129_C	12832.3	12833.3	0.309562	0.971141	0.604766	0.882592	0.759216	0.944057
6	rs2523943	0	30050906	C	A	1423	rs2523943_C	12832.3	12833.3	0.309562	0.971192	0.604772	0.884139	0.760608	0.943149
6	rs114605621	0	30050958	G	C	1424	rs114605621_G	12832.9	12833.8	0.289727	0.385522	0.391585	0.474393	0.442512	0.548844
6	rs400488	0	30051014	A	G	1425	rs400488_A	12831.7	12830.6	0.078389	0.450595	0.283482	0.529907	0.619408	0.382811
6	rs115895139	0	30051157	G	A	1426	rs115895139_G	12830.6	12828.3	0.0397351	0.0181552	0.127968	0.0266381	0.13954	0.173106
6	rs114200354	0	30051248	A	G	1427	rs114200354_A	12826.7	12825.6	0.0818653	0.457254	0.291089	0.543627	0.630557	0.394315
6	rs116836924	0	30051260	A	G	1428	rs116836924_A	12827.4	12825.5	0.0494675	0.0233365	0.154588	0.034059	0.168361	0.20839
6	rs114857993	0	30051317	A	G	1429	rs114857993_A	12832.9	12833.7	0.274899	0.106028	0.239989	0.270914	0.353639	0.35847
6	rs112672605	0	30051334	A	G	1430	rs112672605_A	12828.4	12829.4	0.312595	0.508808	0.629713	0.591344	0.444137	0.397223
6	rs2735076	0	30051469	A	G	1431	rs2735076_A	12829	12828.6	0.120365	0.043165	0.12131	0.108468	0.27525	0.227617
6	rs115638442	0	30051560	A	C	1432	rs115638442_A	12830	12830.9	0.285914	0.380362	0.386664	0.46889	0.437591	0.543688
6	rs114500036	0	30051635	A	C	1433	rs114500036_A	12827.4	12816.7	0.000369863	0.000455892	0.00605992	0.000446584	0.0223253	0.0246315
6	rs2394251	0	30051667	G	C	1434	rs2394251_G	12805	12807	0.850838	0.965474	0.889357	0.391356	0.614742	0.764496
6	rs3823363	0	30051694	A	G	1435	rs3823363_A	12829.5	12828.4	0.0758477	0.0450932	0.194995	0.0105014	0.0759347	0.17401
6	rs2893999	0	30051811	G	A	1436	rs2893999_G	12832.9	12831.2	0.0535922	0.110534	0.078672	0.0809528	0.332999	0.421026
6	rs2245961	0	30051983	C	A	1437	rs2245961_C	12831.7	12833.5	0.664657	0.728873	0.949646	0.888498	0.998698	0.966098
6	rs3823374	0	30052127	A	C	1438	rs3823374_A	12832.9	12830.4	0.0337836	0.0198248	0.123993	0.0261779	0.193022	0.184497
6	rs3823375	0	30052137	G	A	1439	rs3823375_G	12832.9	12829.8	0.0235674	0.0127841	0.0896483	0.0149413	0.13846	0.136337
6	rs114764471	0	30052163	A	G	1440	rs114764471_A	12832.3	12834.3	0.95322	0.688861	0.769644	0.356072	0.778642	0.905732
6	rs115652293	0	30052232	A	C	1441	rs115652293_A	12830.1	12827.6	0.0343558	0.0201696	0.126329	0.027116	0.199791	0.193958
6	rs114341347	0	30052293	A	G	1442	rs114341347_A	12824	12818.3	0.00550108	0.0161646	0.0598787	0.0252032	0.148176	0.090752
6	rs114076256	0	30053189	T	A	1443	rs114076256_T	12828.4	12829.3	0.303607	0.378051	0.389023	0.479125	0.450901	0.566544
6	rs3823382	0	30053189	T	A	1444	rs3823382_T	12829	12830	0.314621	0.396662	0.390373	0.468292	0.441357	0.55946
6	rs115400432	0	30053249	G	A	1445	rs115400432_G	12832.9	12832.9	0.161524	0.911913	0.638001	0.974859	0.491543	0.470861
6	rs2571375	0	30053249	G	A	1446	rs2571375_G	12796.8	12796.9	0.171092	0.923388	0.652866	0.996775	0.508549	0.490091
6	rs114752578	0	30053347	G	A	1447	rs114752578_G	12832.9	12833.8	0.307293	0.406596	0.414326	0.497434	0.463107	0.571117
6	rs3823384	0	30053347	G	A	1448	rs3823384_G	12832.9	12833.8	0.307293	0.406596	0.414326	0.497434	0.463107	0.571117
6	rs115313850	0	30053363	G	C	1449	rs115313850_G	12832.9	12832.2	0.0984903	0.155021	0.23593	0.130154	0.122682	0.107854
6	rs116760485	0	30053487	A	G	1450	rs116760485_A	12832.3	12833.1	0.280743	0.37185	0.378583	0.457184	0.424554	0.528408
6	rs9260860	0	30053487	A	G	1451	rs9260860_A	12832.9	12833.7	0.281494	0.373283	0.379935	0.458789	0.426512	0.530675
6	rs114137304	0	30053573	A	G	1452	rs114137304_A	12816.2	12816.8	0.23643	0.315988	0.324909	0.389118	0.356051	0.455918
6	rs2246198	0	30053581	A	G	1453	rs2246198_A	12832.9	12834.5	0.553696	0.142105	0.344632	0.109022	0.224988	0.364659
6	rs115010417	0	30053599	A	G	1454	rs115010417_A	12800.8	12802.7	0.863578	0.316564	0.701736	0.202601	0.446957	0.604419
6	rs2246199	0	30053599	A	G	1455	rs2246199_A	12832.9	12834.9	0.868172	0.315875	0.697738	0.203092	0.443557	0.600395
6	rs115835372	0	30053720	A	G	1456	rs115835372_A	12832.9	12833.8	0.307293	0.406098	0.413834	0.494751	0.461544	0.57014
6	rs116165079	0	30053750	A	C	1457	rs116165079_A	12832.9	12833.8	0.307293	0.406098	0.413834	0.494751	0.461544	0.57014
6	rs9260863	0	30053750	A	C	1458	rs9260863_A	12832.9	12833.9	0.316022	0.414391	0.421856	0.501394	0.46716	0.577431
6	rs115341126	0	30053820	A	G	1459	rs115341126_A	12827.1	12828	0.290387	0.380211	0.386688	0.463778	0.431483	0.53807
6	rs9260864	0	30053820	A	G	1460	rs9260864_A	12832.9	12833.7	0.281494	0.373283	0.379935	0.458789	0.426512	0.530675
6	rs114826715	0	30053928	A	G	1461	rs114826715_A	12818.5	12803.7	4.17644e-05	0.00147477	0.00907644	2.32614e-05	0.00428954	0.00574314
6	rs3132685	0	30053928	A	G	1462	rs3132685_A	12824.6	12808.7	2.34263e-05	0.000934456	0.00627321	1.356e-05	0.0029277	0.0040217
6	rs115561999	0	30053998	A	G	1463	rs115561999_A	12819.1	12820	0.29344	0.382085	0.391431	0.47407	0.436935	0.544097
6	rs114297328	0	30054432	A	G	1464	rs114297328_A	12813.6	12814.7	0.343041	0.449522	0.458931	0.541139	0.505134	0.619504
6	rs115866314	0	30054635	G	A	1465	rs115866314_G	12832.9	12833.7	0.281494	0.373283	0.379935	0.458789	0.426512	0.530675
6	rs2108691	0	30056344	A	C	1466	rs2108691_A	12830.1	12831.3	0.350924	0.828478	0.854939	0.688652	0.954132	0.762259
6	rs116661662	0	30056380	A	G	1467	rs116661662_A	12832.9	12833.7	0.281494	0.373283	0.379935	0.458789	0.426512	0.530675
6	rs115335559	0	30056536	A	G	1468	rs115335559_A	12832.9	12833.6	0.25717	0.345508	0.350862	0.422993	0.392845	0.487146
6	rs115974659	0	30056730	A	G	1469	rs115974659_A	12832.9	12834.5	0.508542	0.59566	0.456819	0.672244	0.881283	0.929162
6	rs9260918	0	30056730	A	G	1470	rs9260918_A	12832.9	12834.5	0.508542	0.59566	0.456819	0.672244	0.881283	0.929162
6	rs116764498	0	30056791	A	T	1471	rs116764498_A	12832.9	12826.7	0.00418931	0.0175692	0.0433236	0.00470846	0.109075	0.126781
6	rs2844802	0	30056791	A	T	1472	rs2844802_A	12829	12822.9	0.00459813	0.0192185	0.0464778	0.00516057	0.116365	0.134726
6	rs116196668	0	30056863	A	G	1473	rs116196668_A	12832.9	12833.8	0.289242	0.380745	0.387147	0.466746	0.433225	0.538933
6	rs114324757	0	30056920	A	G	1474	rs114324757_A	12832.9	12831.4	0.0617013	0.123512	0.088787	0.0908175	0.362402	0.453133
6	rs114877310	0	30057009	C	G	1475	rs114877310_C	12832.9	12834	0.337781	0.851309	0.831768	0.708467	0.932836	0.741929
6	rs423808	0	30057102	A	C	1476	rs423808_A	12797.3	12799.1	0.698245	0.468012	0.722318	0.350793	0.645721	0.828147
6	rs410909	0	30057147	A	C	1477	rs410909_A	12832.9	12834	0.337781	0.851309	0.831768	0.708467	0.932836	0.741929
6	rs115888293	0	30057321	G	A	1478	rs115888293_G	12832.9	12834.3	0.436598	0.84982	0.736099	0.882875	0.586245	0.480651
6	rs2246638	0	30057476	A	G	1479	rs2246638_A	12832.9	12834.8	0.802964	0.512401	0.76721	0.460909	0.715734	0.956182
6	rs114138639	0	30057497	A	G	1480	rs114138639_A	12832.3	12833.3	0.327342	0.870374	0.81381	0.721607	0.917284	0.724836
6	rs2246642	0	30057497	A	G	1481	rs2246642_A	12832.9	12834	0.337781	0.851309	0.831768	0.708467	0.932836	0.741929
6	rs114695814	0	30057768	A	G	1482	rs114695814_A	12832.9	12824.2	0.00106518	0.00785628	0.00265047	0.0119442	0.00481309	0.00525086
6	rs2394255	0	30057800	G	A	1483	rs2394255_G	12831.7	12829.4	0.0372141	0.0169329	0.0627322	0.0036325	0.0831867	0.188074
6	rs115844415	0	30058189	G	A	1484	rs115844415_G	12832.9	12826.6	0.00396404	0.0171182	0.0421623	0.0045342	0.106333	0.123056
6	rs401618	0	30058189	G	A	1485	rs401618_G	12832.9	12826.6	0.00406578	0.0174188	0.0427972	0.00463409	0.107753	0.124686
6	rs115233419	0	30058562	G	A	1486	rs115233419_G	12832.9	12834.7	0.687455	0.13096	0.200822	0.129856	0.352135	0.372347
6	rs116553443	0	30058647	A	G	1487	rs116553443_A	12832.9	12834.1	0.379654	0.504163	0.600023	0.561896	0.95909	0.727837
6	rs114950038	0	30058812	C	G	1488	rs114950038_C	12825	12823.1	0.0462286	0.020572	0.0733265	0.00449696	0.0922787	0.20429
6	rs115775300	0	30058818	G	C	1489	rs115775300_G	12822.4	12821.3	0.0778203	0.178386	0.095501	0.285644	0.285519	0.166951
6	rs114160221	0	30058958	C	A	1490	rs114160221_C	12831.7	12830.5	0.0701993	0.165542	0.0878697	0.266027	0.267083	0.154469
6	rs2517808	0	30058990	A	G	1491	rs2517808_A	12832.9	12829.6	0.0211274	0.000363588	0.00391676	0.000429639	0.00505902	0.00493712
6	rs115251642	0	30059085	G	A	1492	rs115251642_G	12832.9	12826.9	0.00464478	0.019651	0.0468611	0.00527906	0.116754	0.134735
6	rs2735067	0	30059085	G	A	1493	rs2735067_G	12832.9	12826.9	0.00464478	0.019651	0.0468611	0.00527906	0.116754	0.134735
6	rs116578749	0	30059183	A	G	1494	rs116578749_A	12832.9	12831.5	0.064842	0.153169	0.0801192	0.249859	0.249923	0.143003
6	rs115658280	0	30059273	A	C	1495	rs115658280_A	12813.3	12812	0.0682164	0.163062	0.0834861	0.256072	0.255629	0.146045
6	rs115400074	0	30059761	G	A	1496	rs115400074_G	12758.5	12759.3	0.275602	0.365657	0.38581	0.457566	0.426367	0.539117
6	rs114757350	0	30060141	G	A	1497	rs114757350_G	12827.7	12826.6	0.0804392	0.181067	0.0978011	0.288039	0.287458	0.169422
6	rs11757750	0	30060141	G	A	1498	rs11757750_G	12832.9	12831.7	0.0723516	0.168934	0.0898575	0.271644	0.271998	0.157823
6	rs116163566	0	30060793	G	A	1499	rs116163566_G	12825.9	12824.7	0.0724081	0.166066	0.0863907	0.264821	0.267249	0.152192
6	rs115071807	0	30060899	A	G	1500	rs115071807_A	12808.3	12806.7	0.056605	0.134807	0.0697343	0.220735	0.218638	0.12492
6	rs115946370	0	30060903	T	A	1501	rs115946370_T	12832.3	12833.6	0.409238	0.82148	0.709757	0.856239	0.560454	0.463511
6	rs114451194	0	30060910	A	G	1502	rs114451194_A	12777.7	12776.6	0.0757904	0.174925	0.0930284	0.27069	0.2678	0.15315
6	rs114993291	0	30061014	A	G	1503	rs114993291_A	12823.3	12822.3	0.0811352	0.188325	0.101237	0.291549	0.2879	0.170586
6	rs115788285	0	30061078	A	G	1504	rs115788285_A	12827.7	12826	0.0546466	0.141792	0.0716288	0.225881	0.226794	0.126468
6	rs11755961	0	30061078	A	G	1505	rs11755961_A	12832.3	12830.8	0.0622057	0.150929	0.0768389	0.237486	0.23924	0.135544
6	rs114633038	0	30061249	G	C	1506	rs114633038_G	12830	12829.1	0.0915869	0.202634	0.111612	0.320926	0.315879	0.187218
6	rs2735065	0	30061568	A	C	1507	rs2735065_A	12832.9	12834	0.356303	0.0183679	0.0446838	0.0158477	0.0546507	0.0499051
6	rs114860141	0	30061607	A	G	1508	rs114860141_A	12810.3	12809.2	0.0801283	0.18324	0.0995149	0.292827	0.293452	0.171496
6	rs116251601	0	30061695	G	A	1509	rs116251601_G	12819.7	12818.4	0.0685476	0.160542	0.0877341	0.260362	0.262318	0.153934
6	rs5875226	0	30061964	I	D	1510	rs5875226_I	12832.9	12831.5	0.064842	0.153169	0.0801192	0.249859	0.249923	0.143003
6	rs114268881	0	30062090	G	A	1511	rs114268881_G	12820.1	12819.2	0.0879036	0.199965	0.109536	0.312828	0.312484	0.18547
6	rs114827979	0	30062178	A	G	1512	rs114827979_A	12805.5	12804	0.06258	0.149623	0.0784946	0.244464	0.244282	0.139051
6	rs114537098	0	30062259	G	A	1513	rs114537098_G	12819.8	12818.6	0.0712025	0.170643	0.0913473	0.274364	0.27474	0.160946
6	rs4947244	0	30062343	G	C	1514	rs4947244_G	12832.3	12829.4	0.0264008	0.0102564	0.0785376	0.00991123	0.0776883	0.100841
6	rs114421444	0	30062596	G	A	1515	rs114421444_G	12823.6	12822.2	0.0640944	0.152551	0.0773262	0.241484	0.244241	0.139184
6	rs114431800	0	30062621	A	G	1516	rs114431800_A	12828.3	12826.6	0.0546296	0.139258	0.0726736	0.230219	0.233252	0.131388
6	rs116013920	0	30062763	G	A	1517	rs116013920_G	12811.1	12811	0.149251	0.301087	0.185532	0.435238	0.422772	0.266452
6	rs114988554	0	30062830	G	A	1518	rs114988554_G	12832.9	12831.5	0.064842	0.153169	0.0801192	0.249859	0.249923	0.143003
6	rs114513728	0	30063004	G	A	1519	rs114513728_G	12832.9	12833.9	0.324918	0.423335	0.430524	0.512966	0.47331	0.580849
6	rs3901554	0	30063004	G	A	1520	rs3901554_G	12832.3	12833.4	0.350768	0.447522	0.453865	0.538248	0.501236	0.614722
6	rs114912266	0	30063067	A	C	1521	rs114912266_A	12832.9	12831.5	0.064842	0.153169	0.0801192	0.249859	0.249923	0.143003
6	rs5025708	0	30063178	C	A	1522	rs5025708_C	12832.9	12826.4	0.00358995	0.0168847	0.0186475	0.133017	0.23359	0.104872
6	rs115915736	0	30063201	C	A	1523	rs115915736_C	12832.3	12830.9	0.0651118	0.153566	0.0803519	0.250727	0.250856	0.143623
6	rs116264267	0	30063367	G	A	1524	rs116264267_G	12832.9	12831.5	0.064842	0.153169	0.0801192	0.249859	0.249923	0.143003
6	rs114024731	0	30063410	A	G	1525	rs114024731_A	12832.9	12831.4	0.0623527	0.14721	0.0767364	0.242132	0.24294	0.138074
6	rs116306180	0	30063483	A	T	1526	rs116306180_A	12638.2	12639.4	0.372726	0.251886	0.296111	0.20957	0.17698	0.252727
6	rs116477860	0	30063999	G	A	1527	rs116477860_G	12803.1	12801.7	0.0640434	0.151721	0.078894	0.246389	0.246904	0.140911
6	rs115256891	0	30064028	A	G	1528	rs115256891_A	12777.7	12776.6	0.0748714	0.174135	0.0929215	0.274341	0.276256	0.160932
6	rs116562537	0	30064629	A	C	1529	rs116562537_A	12802.6	12801.1	0.0643949	0.154914	0.0816471	0.252282	0.251946	0.143698
6	rs114537101	0	30064932	G	A	1530	rs114537101_G	12821.3	12822.3	0.317415	0.414438	0.420304	0.50479	0.463573	0.569986
6	rs9260930	0	30064932	G	A	1531	rs9260930_G	12832.9	12833.9	0.324918	0.423335	0.430524	0.512966	0.47331	0.580849
6	rs115216911	0	30065048	G	A	1532	rs115216911_G	12805	12802.1	0.0256564	0.00959894	0.0746062	0.00923696	0.0742164	0.0976345
6	rs114977730	0	30065057	G	A	1533	rs114977730_G	12809.8	12807.7	0.0436619	0.0185872	0.0652414	0.00371927	0.0845784	0.191846
6	rs114481163	0	30065264	C	A	1534	rs114481163_C	12803.1	12801.9	0.0738122	0.166196	0.0891026	0.265975	0.266265	0.154254
6	rs115279586	0	30065487	C	A	1535	rs115279586_C	12832.9	12834	0.353187	0.458596	0.466909	0.55102	0.510338	0.621947
6	rs116634325	0	30065781	G	A	1536	rs116634325_G	12792	12793	0.339146	0.438178	0.445269	0.526338	0.48286	0.59632
6	rs9260932	0	30065781	G	A	1537	rs9260932_G	12832.9	12834	0.353187	0.458596	0.466909	0.55102	0.510338	0.621947
6	rs9260934	0	30065961	A	G	1538	rs9260934_A	12832.3	12833.3	0.324093	0.422197	0.42944	0.511997	0.472307	0.579684
6	rs114423935	0	30067725	G	A	1539	rs114423935_G	12794.7	12795.6	0.299782	0.394806	0.397562	0.464371	0.417599	0.524256
6	rs116329233	0	30067914	C	G	1540	rs116329233_C	12832.3	12833.2	0.287744	0.370537	0.372795	0.446747	0.403593	0.507151
6	rs7749944	0	30067979	C	A	1541	rs7749944_C	12823.6	12822.9	0.102433	0.111177	0.142716	0.0642326	0.0148994	0.0161226
6	rs7749944	0	30067979	C	A	1542	rs7749944_C.1	12832.9	12832.2	0.104315	0.113098	0.14499	0.065329	0.0152752	0.0165268
6	rs114862917	0	30068310	A	C	1543	rs114862917_A	12830.1	12827.4	0.0289652	0.0406866	0.0258424	0.0936213	0.480311	0.428337
6	rs16896853	0	30068310	A	C	1544	rs16896853_A	12823.4	12821	0.0343074	0.0494785	0.0314957	0.11213	0.540622	0.485713
6	rs116202746	0	30068480	A	G	1545	rs116202746_A	12696.2	12688.6	0.00191647	0.00137484	0.00146235	0.000877564	0.00085521	0.0016036
6	rs115016730	0	30068849	A	T	1546	rs115016730_A	12832.9	12834.5	0.537375	0.674879	0.50583	0.759605	0.799335	0.54207
6	rs114599368	0	30068937	C	G	1547	rs114599368_C	12823.9	12825.5	0.545334	0.683571	0.514131	0.767216	0.801854	0.546472
6	rs116513743	0	30068978	A	C	1548	rs116513743_A	12830.1	12831.7	0.532554	0.665778	0.505	0.76302	0.803117	0.54536
6	rs116535071	0	30069185	A	G	1549	rs116535071_A	12832.9	12834.7	0.645173	0.702234	0.810465	0.940683	0.895764	0.874771
6	rs114187835	0	30069253	G	A	1550	rs114187835_G	12832.3	12816	1.86034e-05	0.000298826	0.00357801	7.14852e-05	0.016576	0.015052
6	rs116414439	0	30069260	A	G	1551	rs116414439_A	12832.9	12834.5	0.537375	0.674879	0.50583	0.759605	0.799335	0.54207
6	rs115742376	0	30069346	A	G	1552	rs115742376_A	12832.9	12834.5	0.537375	0.671497	0.503138	0.758486	0.797061	0.539468
6	rs114096489	0	30069418	A	C	1553	rs114096489_A	12832.9	12834.5	0.528891	0.667401	0.499554	0.750266	0.790878	0.53477
6	rs114451271	0	30069610	A	G	1554	rs114451271_A	12832.9	12834.8	0.720894	0.142408	0.219635	0.14372	0.383291	0.401266
6	rs115455095	0	30069701	A	G	1555	rs115455095_A	12832.9	12834.5	0.537375	0.674879	0.50583	0.759605	0.799335	0.54207
6	rs114774383	0	30069832	A	G	1556	rs114774383_A	12832.9	12834.5	0.512572	0.645535	0.47974	0.729743	0.768609	0.515781
6	rs116399269	0	30070247	A	G	1557	rs116399269_A	12832.9	12833.7	0.280267	0.363507	0.366044	0.439368	0.396132	0.497893
6	rs9260984	0	30070247	A	G	1558	rs9260984_A	12832.9	12833.7	0.280267	0.363507	0.366044	0.439368	0.396132	0.497893
6	rs115094340	0	30070494	G	A	1559	rs115094340_G	12832.3	12833.8	0.489999	0.617575	0.45511	0.697748	0.736914	0.489839
6	rs9260988	0	30070494	G	A	1560	rs9260988_G	12832.9	12834.4	0.488392	0.616172	0.453946	0.696358	0.73501	0.488256
6	rs115896331	0	30070720	A	G	1561	rs115896331_A	12830.1	12828.9	0.0710413	0.0998184	0.0576719	0.19797	0.816799	0.739583
6	rs114465658	0	30070775	C	G	1562	rs114465658_C	12832.3	12833.9	0.531012	0.665968	0.503551	0.756554	0.798447	0.53977
6	rs115157072	0	30071044	A	G	1563	rs115157072_A	12712.6	12706.8	0.00512948	0.00186988	0.00978747	0.000298321	0.0154021	0.044181
6	rs6457121	0	30071044	A	G	1564	rs6457121_A	12682.4	12678.2	0.0130144	0.00533688	0.0258259	0.000955473	0.0359627	0.0947117
6	rs116173729	0	30071158	G	A	1565	rs116173729_G	12832.3	12834	0.601202	0.748702	0.571257	0.836867	0.891345	0.62111
6	rs6910898	0	30071158	G	A	1566	rs6910898_G	12832.9	12834.6	0.599416	0.747186	0.569942	0.834764	0.889026	0.619027
6	rs114069585	0	30071703	A	C	1567	rs114069585_A	12832.9	12831.6	0.0696269	0.164676	0.0873552	0.266116	0.266047	0.153476
6	rs115709770	0	30072446	G	A	1568	rs115709770_G	12831.1	12832.8	0.553893	0.453015	0.595626	0.382321	0.355015	0.558954
6	rs115497931	0	30072784	A	G	1569	rs115497931_A	12832.9	12834.1	0.374392	0.527872	0.564574	0.657073	0.593475	0.667058
6	rs114302546	0	30073285	A	G	1570	rs114302546_A	12832.9	12834.5	0.512572	0.644896	0.479215	0.727796	0.765842	0.513744
6	rs114934460	0	30073323	G	A	1571	rs114934460_G	12832.3	12833.9	0.522582	0.657646	0.4897	0.743115	0.779955	0.525754
6	rs6911279	0	30073323	G	A	1572	rs6911279_G	12832.9	12834.5	0.52092	0.656199	0.488483	0.741078	0.778124	0.524185
6	rs114436708	0	30073480	A	C	1573	rs114436708_A	12832.3	12833	0.247144	0.301291	0.203065	0.300911	0.39556	0.229235
6	rs6911737	0	30073480	A	C	1574	rs6911737_A	12832.3	12833	0.247144	0.301291	0.203065	0.300911	0.39556	0.229235
6	rs116568351	0	30073542	A	C	1575	rs116568351_A	12832.3	12833.9	0.522788	0.653939	0.486828	0.73585	0.775879	0.520506
6	rs116046402	0	30073650	A	G	1576	rs116046402_A	12832.9	12834.5	0.512572	0.644896	0.479215	0.727796	0.765842	0.513744
6	rs115610346	0	30073760	A	G	1577	rs115610346_A	12793.3	12794.7	0.457832	0.592379	0.433743	0.666924	0.696499	0.462924
6	rs9261026	0	30073952	A	G	1578	rs9261026_A	12832.9	12834.5	0.512572	0.644896	0.479215	0.727796	0.765842	0.513744
6	rs9261035	0	30074154	A	G	1579	rs9261035_A	12832.9	12833.8	0.297517	0.388487	0.392165	0.468497	0.424313	0.5288
6	rs116021206	0	30074280	A	G	1580	rs116021206_A	12831.7	12832.8	0.330146	0.419068	0.42154	0.500436	0.457177	0.569236
6	rs114673490	0	30074444	G	A	1581	rs114673490_G	12832.9	12833.9	0.324323	0.422155	0.426774	0.504938	0.459316	0.568278
6	rs114318558	0	30074766	A	G	1582	rs114318558_A	12796.1	12776.9	4.00433e-06	6.60098e-05	0.00102647	1.78198e-05	0.0066544	0.00613392
6	rs115577179	0	30074829	G	A	1583	rs115577179_G	12832.9	12834.5	0.512572	0.644896	0.479215	0.727796	0.765842	0.513744
6	rs114705877	0	30074875	A	G	1584	rs114705877_A	12832.9	12834.9	0.923904	0.993036	0.957704	0.750467	0.884766	0.963806
6	rs116540128	0	30074983	C	G	1585	rs116540128_C	12829.5	12830.3	0.264114	0.340788	0.342373	0.416448	0.374197	0.472839
6	rs114010067	0	30075168	A	G	1586	rs114010067_A	12804	12805.5	0.491626	0.605901	0.71696	0.685723	0.900866	0.862456
6	rs115911233	0	30075465	G	A	1587	rs115911233_G	12832.9	12833.8	0.297517	0.388487	0.392165	0.468497	0.424313	0.5288
6	rs114547438	0	30075508	A	G	1588	rs114547438_A	12832.3	12833.3	0.313526	0.403576	0.406668	0.488973	0.441508	0.54842
6	rs6923856	0	30075508	A	G	1589	rs6923856_A	12831.1	12832.2	0.338019	0.42635	0.428521	0.510307	0.465023	0.578183
6	rs115585259	0	30075721	G	A	1590	rs115585259_G	12832.9	12833.9	0.315423	0.409297	0.41452	0.494318	0.448454	0.555
6	rs116070960	0	30075778	G	C	1591	rs116070960_G	12724.3	12725.6	0.426878	0.545388	0.576186	0.697459	0.620868	0.717805
6	rs115569650	0	30075969	A	G	1592	rs115569650_A	12832.9	12833.9	0.324323	0.422155	0.426774	0.504938	0.459316	0.568278
6	rs114976079	0	30075978	G	A	1593	rs114976079_G	12823.3	12824.2	0.292954	0.354864	0.373694	0.451205	0.412674	0.511552
6	rs115736869	0	30076101	A	G	1594	rs115736869_A	12694.4	12695.9	0.461127	0.584353	0.586766	0.728706	0.721227	0.856141
6	rs115022796	0	30076254	A	G	1595	rs115022796_A	12832.3	12833.8	0.477477	0.0822172	0.148644	0.0946206	0.296039	0.310564
6	rs116020573	0	30076743	A	G	1596	rs116020573_A	12819.5	12820.5	0.313611	0.408794	0.417505	0.4882	0.445888	0.549883
6	rs116238785	0	30076944	A	G	1597	rs116238785_A	12829.5	12829.3	0.131367	0.271086	0.161495	0.407656	0.39988	0.248478
6	rs115586048	0	30076966	G	A	1598	rs115586048_G	12824.3	12825.5	0.354869	0.45602	0.445546	0.525915	0.481231	0.595659
6	rs116801296	0	30077019	G	A	1599	rs116801296_G	12832.9	12833.8	0.297517	0.388487	0.392165	0.468497	0.424313	0.5288
6	rs115430051	0	30077169	A	G	1600	rs115430051_A	12832.9	12831.6	0.0696269	0.164676	0.0873552	0.266116	0.266047	0.153476
6	rs115733967	0	30077492	G	A	1601	rs115733967_G	12812.4	12813.5	0.340033	0.441288	0.446734	0.526199	0.47935	0.589525
6	rs115286047	0	30077797	G	A	1602	rs115286047_G	12832.3	12833.3	0.313526	0.403586	0.406677	0.484293	0.437481	0.544964
6	rs114217878	0	30077908	A	G	1603	rs114217878_A	12832.9	12833.8	0.297517	0.388487	0.392165	0.468497	0.424313	0.5288
6	rs116725025	0	30077952	A	C	1604	rs116725025_A	12832.9	12833.8	0.297517	0.388487	0.392165	0.468497	0.424313	0.5288
6	rs9261091	0	30077952	A	C	1605	rs9261091_A	12832.9	12833.8	0.297517	0.388487	0.392165	0.468497	0.424313	0.5288
6	rs114467164	0	30078018	A	T	1606	rs114467164_A	12832.3	12830.2	0.0429664	0.106947	0.0566709	0.201338	0.615553	0.504924
6	rs11760176	0	30078406	A	G	1607	rs11760176_A	12832.9	12830.8	0.0427028	0.112548	0.0563497	0.165437	0.110132	0.0564991
6	rs116796832	0	30078568	C	A	1608	rs116796832_C	12812.3	12813.5	0.396984	0.528166	0.381341	0.615345	0.654602	0.422513
6	rs7758512	0	30078568	C	A	1609	rs7758512_C	12821.8	12823.2	0.43153	0.569119	0.406031	0.644592	0.686044	0.447381
6	rs114800379	0	30078664	G	A	1610	rs114800379_G	12832.9	12834.1	0.372471	0.455906	0.465124	0.538151	0.48323	0.594714
6	rs116837657	0	30078906	A	G	1611	rs116837657_A	12751	12750.9	0.141712	0.0723191	0.311933	0.070319	0.335149	0.408359
6	rs116413606	0	30078991	G	A	1612	rs116413606_G	12819.4	12820.8	0.435966	0.0693642	0.130437	0.0808809	0.25943	0.271346
6	rs6905157	0	30079527	G	A	1613	rs6905157_G	12827.4	12829.1	0.577917	0.709283	0.537704	0.790827	0.83413	0.572298
6	rs116725690	0	30079553	A	G	1614	rs116725690_A	12821.8	12819.9	0.0469855	0.0973164	0.0688373	0.0715342	0.308624	0.392321
6	rs115496981	0	30080753	C	G	1615	rs115496981_C	12792	12791.8	0.137608	0.268177	0.166617	0.392098	0.380713	0.229274
6	rs114559026	0	30080963	A	G	1616	rs114559026_A	12832.3	12829.2	0.0239521	0.0595046	0.105387	0.0177947	0.160146	0.22776
6	rs114095793	0	30081114	G	A	1617	rs114095793_G	12832.9	12834.4	0.488392	0.616121	0.453906	0.698383	0.735526	0.488201
6	rs114466399	0	30081166	A	T	1618	rs114466399_A	12832.9	12831.6	0.0696269	0.164676	0.0873552	0.266116	0.266047	0.153476
6	rs11965524	0	30081166	A	T	1619	rs11965524_A	12832.9	12834.5	0.512572	0.644896	0.479215	0.727796	0.765842	0.513744
6	rs116581332	0	30081371	G	A	1620	rs116581332_G	12774.9	12776.5	0.51886	0.634044	0.470905	0.724625	0.752978	0.502089
6	rs115092131	0	30081505	G	A	1621	rs115092131_G	12819.5	12817	0.0337744	0.0147709	0.100748	0.01429	0.104212	0.133381
6	rs115930371	0	30081599	G	A	1622	rs115930371_G	12832.9	12831.4	0.061174	0.121039	0.0876399	0.0888199	0.357873	0.452957
6	rs356967	0	30081889	A	G	1623	rs356967_A	12832.9	12827.5	0.00656983	0.0254152	0.0580913	0.00686634	0.14043	0.163134
6	rs115814721	0	30081904	G	A	1624	rs115814721_G	12832.3	12833.2	0.303504	0.380213	0.486946	0.743415	0.966158	0.822648
6	rs4313034	0	30081904	G	A	1625	rs4313034_G	12802.7	12803.8	0.346698	0.43104	0.535444	0.804819	0.95749	0.89709
6	rs114523436	0	30082133	A	G	1626	rs114523436_A	12785.7	12787.2	0.505095	0.625396	0.618543	0.70703	0.650467	0.784616
6	rs114440360	0	30082479	G	A	1627	rs114440360_G	12832.3	12833.8	0.489999	0.620789	0.457618	0.701463	0.738114	0.490854
6	rs9261105	0	30082479	G	A	1628	rs9261105_G	12824.6	12826.3	0.572326	0.72222	0.547499	0.806969	0.847383	0.58799
6	rs116005752	0	30082654	A	G	1629	rs116005752_A	12832.9	12834.1	0.36902	0.488905	0.584332	0.551711	0.945999	0.718431
6	rs114404619	0	30083026	A	C	1630	rs114404619_A	12832.9	12827.4	0.00622088	0.0238278	0.0548184	0.00644152	0.134723	0.156616
6	rs356968	0	30083026	A	C	1631	rs356968_A	12832.9	12827.4	0.00622088	0.0238278	0.0548184	0.00644152	0.134723	0.156616
6	rs116389580	0	30083074	G	C	1632	rs116389580_G	12821.6	12822.5	0.308679	0.363639	0.390573	0.479552	0.448466	0.556699
6	rs6940082	0	30083074	G	C	1633	rs6940082_G	12827.8	12828.5	0.258278	0.326618	0.339235	0.411354	0.375185	0.471235
6	rs116790848	0	30083432	A	C	1634	rs116790848_A	12832.3	12830.1	0.0403885	0.0199411	0.0745876	0.00460197	0.100922	0.220769
6	rs2240619	0	30083432	A	C	1635	rs2240619_A	12832.9	12830.7	0.0396493	0.0196194	0.0723938	0.00440125	0.0984927	0.216321
6	rs115724275	0	30083698	G	A	1636	rs115724275_G	12827.4	12827.2	0.144696	0.296743	0.178535	0.432271	0.42534	0.268302
6	rs115873309	0	30083754	C	A	1637	rs115873309_C	12816.8	12815.4	0.0674613	0.15121	0.0794263	0.242661	0.248851	0.140654
6	rs115899313	0	30084003	G	C	1638	rs115899313_G	12832.9	12834.4	0.488392	0.616121	0.453906	0.698383	0.735526	0.488201
6	rs115374425	0	30084291	G	C	1639	rs115374425_G	12831.7	12833.6	0.759286	0.697671	0.776286	0.630488	0.58011	0.928726
6	rs117603204	0	30084965	A	G	1640	rs117603204_A	12745.2	12733.2	0.000191265	7.83541e-05	0.00280838	8.3212e-06	0.00263171	0.00414679
6	rs115037049	0	30085124	G	C	1641	rs115037049_G	12796.8	12790.3	0.00349977	0.0146164	0.0351917	0.00366223	0.0942648	0.110888
6	rs115692300	0	30085454	G	C	1642	rs115692300_G	12832.9	12834.7	0.672627	0.763699	0.813477	0.821749	0.88919	0.901225
6	rs115603409	0	30085952	C	G	1643	rs115603409_C	12832.9	12834.4	0.488392	0.616121	0.453906	0.698383	0.735526	0.488201
6	rs115985025	0	30086006	A	G	1644	rs115985025_A	12832.9	12831.6	0.0696269	0.164676	0.0873552	0.266116	0.266047	0.153476
6	rs12661053	0	30086006	A	G	1645	rs12661053_A	12832.9	12831.6	0.0696269	0.164676	0.0873552	0.266116	0.266047	0.153476
6	rs116641868	0	30086331	A	G	1646	rs116641868_A	12825.6	12823.1	0.0338032	0.014833	0.102197	0.0147654	0.105584	0.134283
6	rs4713281	0	30086331	A	G	1647	rs4713281_A	12825.5	12822.6	0.0276814	0.0119669	0.0870966	0.011773	0.0898405	0.11438
6	rs115899276	0	30086505	G	A	1648	rs115899276_G	12831.1	12828.5	0.0317167	0.000669738	0.00417535	0.000459643	0.00580775	0.00575733
6	rs114426144	0	30086632	C	G	1649	rs114426144_C	12832.9	12834.1	0.36902	0.488905	0.584332	0.551711	0.945999	0.718431
6	rs116774144	0	30087368	G	A	1650	rs116774144_G	12831.7	12832.7	0.31321	0.40321	0.40632	0.483849	0.437174	0.544535
6	rs114218820	0	30087558	G	A	1651	rs114218820_G	12832.9	12834.4	0.488392	0.616121	0.453906	0.698383	0.735526	0.488201
6	rs114784126	0	30087622	A	G	1652	rs114784126_A	12830	12828.7	0.0683788	0.163626	0.0867509	0.264241	0.264855	0.152661
6	rs115866444	0	30087776	C	A	1653	rs115866444_C	12829.5	12813.2	1.87459e-05	0.000286114	0.00344698	6.93274e-05	0.0165234	0.0151532
6	rs356971	0	30087776	C	A	1654	rs356971_C	12830.1	12813.7	1.755e-05	0.000273481	0.00332296	6.58276e-05	0.0160395	0.0146962
6	rs116239920	0	30087805	G	A	1655	rs116239920_G	12832.9	12834.5	0.512572	0.644896	0.479215	0.727796	0.765842	0.513744
6	rs115329902	0	30087995	C	A	1656	rs115329902_C	12832.9	12829.6	0.0220896	0.0593777	0.0312552	0.125469	0.449961	0.36218
6	rs114662508	0	30088052	G	A	1657	rs114662508_G	12832.9	12833.7	0.273295	0.351961	0.357473	0.433145	0.38764	0.484001
6	rs3734836	0	30088052	G	A	1658	rs3734836_G	12832.9	12833.7	0.280882	0.359129	0.364392	0.439001	0.39242	0.490395
6	rs116039800	0	30088169	A	G	1659	rs116039800_A	12749.1	12749.3	0.184443	0.388483	0.243833	0.563428	0.571321	0.394584
6	rs3115635	0	30088472	A	G	1660	rs3115635_A	12781.4	12779.4	0.047319	0.0223217	0.0803413	0.00539459	0.111262	0.236534
6	rs115621121	0	30089042	G	A	1661	rs115621121_G	12829.5	12830.3	0.259604	0.322752	0.333764	0.338132	0.219341	0.295286
6	rs116145040	0	30089166	G	A	1662	rs116145040_G	12832.9	12833.8	0.297517	0.388487	0.392165	0.468497	0.424313	0.5288
6	rs115147953	0	30089406	G	A	1663	rs115147953_G	12832.9	12828.9	0.0142783	0.0463883	0.0454998	0.242292	0.399776	0.204225
6	rs9261136	0	30089406	G	A	1664	rs9261136_G	12826.8	12822.1	0.00989973	0.0338646	0.0328981	0.192155	0.328457	0.160769
6	rs114587875	0	30089494	A	G	1665	rs114587875_A	12735.9	12733.1	0.0285347	0.0433132	0.0376538	0.0508945	0.0430923	0.0604989
6	rs9261138	0	30089494	A	G	1666	rs9261138_A	12787.1	12786	0.0752289	0.114029	0.116219	0.142208	0.128284	0.175861
6	rs115465871	0	30089729	A	G	1667	rs115465871_A	12832.9	12831.4	0.0613693	0.121404	0.0879401	0.0906654	0.362817	0.45737
6	rs114432553	0	30090020	G	C	1668	rs114432553_G	12824.5	12822.6	0.048438	0.100407	0.0647657	0.0695193	0.292964	0.371839
6	rs116238313	0	30090742	C	G	1669	rs116238313_C	12830.1	12829.3	0.090427	0.204894	0.113212	0.31987	0.319361	0.189291
6	rs6457126	0	30091018	A	G	1670	rs6457126_A	12832.3	12830	0.0389119	0.0189671	0.0715231	0.00437124	0.0974743	0.214847
6	rs114356170	0	30091123	T	A	1671	rs114356170_T	12832.9	12834.4	0.469428	0.0802923	0.145698	0.0926099	0.291897	0.30599
6	rs114019025	0	30091204	A	G	1672	rs114019025_A	12797.7	12799.5	0.597234	0.118007	0.191541	0.124161	0.356982	0.379356
6	rs356954	0	30091517	G	A	1673	rs356954_G	12832.9	12827.4	0.00623195	0.0238536	0.054857	0.00643085	0.135206	0.15648
6	rs116542020	0	30091694	C	A	1674	rs116542020_C	12826.8	12821.3	0.00623026	0.0242586	0.0277653	0.166591	0.283047	0.134777
6	rs115150143	0	30092102	A	G	1675	rs115150143_A	12761.2	12755.2	0.00474658	0.0177313	0.0175207	0.124873	0.219671	0.1006
6	rs116693421	0	30092231	A	G	1676	rs116693421_A	12832.9	12830.2	0.0305788	0.0130263	0.0943924	0.0131187	0.0966078	0.12145
6	rs9357092	0	30092231	A	G	1677	rs9357092_A	12832.9	12830.2	0.0305788	0.0130263	0.0943924	0.0131187	0.0966078	0.12145
6	rs115293893	0	30092822	A	C	1678	rs115293893_A	12832.9	12829.9	0.0258137	0.0370108	0.0188306	0.0819358	0.503178	0.44228
6	rs116724742	0	30092844	A	G	1679	rs116724742_A	12832.9	12834.5	0.512572	0.644801	0.479139	0.727715	0.767616	0.51816
6	rs114917796	0	30093304	G	A	1680	rs114917796_G	12832.3	12833.2	0.288354	0.375187	0.379553	0.455212	0.411048	0.512919
6	rs115931096	0	30093467	G	A	1681	rs115931096_G	12832.9	12833.9	0.315423	0.409297	0.414571	0.492049	0.446196	0.55256
6	rs116554894	0	30093609	G	A	1682	rs116554894_G	12827.8	12825.3	0.0332633	0.0147212	0.102694	0.0145546	0.106522	0.135761
6	rs115136522	0	30093828	A	G	1683	rs115136522_A	12832.9	12834.4	0.479655	0.619313	0.457835	0.694346	0.730864	0.484004
6	rs6926792	0	30093828	A	G	1684	rs6926792_A	12832.9	12834.5	0.52092	0.656199	0.488483	0.738445	0.777455	0.524283
6	rs115846644	0	30094121	A	G	1685	rs115846644_A	12832.9	12831.6	0.0696269	0.164676	0.0873552	0.266116	0.266047	0.153476
6	rs114175826	0	30094303	A	T	1686	rs114175826_A	12794	12771.7	8.19753e-07	4.22243e-05	0.000411254	1.50026e-07	8.84947e-05	0.000160134
6	rs3115631	0	30094303	A	T	1687	rs3115631_A	12794.6	12771.3	4.96103e-07	2.62979e-05	0.000272021	7.99786e-08	5.36963e-05	9.76823e-05
6	rs116796019	0	30094389	G	A	1688	rs116796019_G	12832.9	12830.4	0.0345915	0.0495024	0.025921	0.105291	0.584149	0.519414
6	rs114256021	0	30094406	G	A	1689	rs114256021_G	12831.7	12833.3	0.491609	0.620665	0.457626	0.70348	0.742932	0.49713
6	rs114797859	0	30094480	A	G	1690	rs114797859_A	12832.9	12831.6	0.0696269	0.164676	0.0873552	0.266116	0.266047	0.153476
6	rs115435602	0	30094663	G	A	1691	rs115435602_G	12832.9	12834.4	0.485089	0.707237	0.941115	0.60902	0.983539	0.824242
6	rs114564278	0	30095099	G	A	1692	rs114564278_G	12832.9	12834.4	0.496531	0.62721	0.462902	0.708881	0.746997	0.498463
6	rs114088855	0	30095101	G	A	1693	rs114088855_G	12830	12830.4	0.204935	0.243458	0.313444	0.173475	0.148386	0.133659
6	rs114336030	0	30095163	A	G	1694	rs114336030_A	12832.9	12830.4	0.0336732	0.0147488	0.102166	0.0146496	0.10686	0.135286
6	rs4711206	0	30095163	A	G	1695	rs4711206_A	12825.9	12823.3	0.0320597	0.0140116	0.0983526	0.0140171	0.104498	0.132722
6	rs3869065	0	30095453	G	C	1696	rs3869065_G	12815.8	12814	0.0533982	0.0276884	0.100049	0.00736016	0.140051	0.288398
6	rs115012064	0	30095717	A	G	1697	rs115012064_A	12832.9	12833.9	0.315423	0.405524	0.40069	0.480736	0.434098	0.537776
6	rs114028028	0	30096378	A	G	1698	rs114028028_A	12832.9	12834.4	0.496531	0.62721	0.462902	0.708881	0.746997	0.498463
6	rs116726170	0	30096418	C	A	1699	rs116726170_C	12832.9	12833.9	0.315423	0.405524	0.411121	0.490709	0.445752	0.551327
6	rs3891157	0	30096418	C	A	1700	rs3891157_C	12832.9	12833.8	0.289117	0.376262	0.380572	0.456131	0.411786	0.513645
6	rs116084313	0	30096621	A	G	1701	rs116084313_A	12832.3	12815.8	1.7062e-05	0.000266228	0.00322106	6.23232e-05	0.0158259	0.0140942
6	rs3129012	0	30096621	A	G	1702	rs3129012_A	12832.9	12816.4	1.73497e-05	0.000270729	0.0032649	6.39335e-05	0.016057	0.0143035
6	rs116404275	0	30096719	A	G	1703	rs116404275_A	12832.9	12833.8	0.289117	0.376262	0.380572	0.456131	0.411786	0.513645
6	rs115362062	0	30096943	G	A	1704	rs115362062_G	12832.3	12831	0.0699126	0.1651	0.0876071	0.266669	0.266539	0.153807
6	rs114925851	0	30097167	G	A	1705	rs114925851_G	12831.7	12830.5	0.0701993	0.165821	0.0880321	0.267859	0.267846	0.154675
6	rs114229542	0	30097668	A	G	1706	rs114229542_A	12832.9	12831.6	0.0696269	0.164676	0.0873552	0.266116	0.266047	0.153476
6	rs115707880	0	30097674	C	G	1707	rs115707880_C	12825.6	12820.3	0.00684178	0.0250335	0.0554018	0.00653836	0.136015	0.156446
6	rs165255	0	30097674	G	C	1708	rs165255_G	12718.8	12712.8	0.00465921	0.0178183	0.0385083	0.00425867	0.109548	0.125488
6	rs114438929	0	30098004	A	G	1709	rs114438929_A	12832.9	12831.2	0.055168	0.154174	0.095816	0.1521	0.111777	0.0891886
6	rs11970651	0	30098882	G	A	1710	rs11970651_G	12832.9	12834.8	0.760862	0.699217	0.777824	0.636194	0.588908	0.937903
6	rs9261156	0	30099517	A	C	1711	rs9261156_A	12818.5	12820.2	0.555333	0.683197	0.697772	0.789257	0.732454	0.864543
6	rs115310883	0	30099552	A	G	1712	rs115310883_A	12824.6	12823.3	0.0671008	0.159817	0.0842108	0.260723	0.259241	0.148717
6	rs114447065	0	30099628	G	A	1713	rs114447065_G	12832.9	12833.8	0.289117	0.376262	0.380572	0.456131	0.411786	0.513645
6	rs116494283	0	30099678	G	A	1714	rs116494283_G	12832.9	12834.4	0.496531	0.62721	0.462902	0.708881	0.746997	0.498463
6	rs6919617	0	30099678	G	A	1715	rs6919617_G	12832.9	12834.4	0.496531	0.62721	0.462902	0.708881	0.746997	0.498463
6	rs115920192	0	30099777	A	G	1716	rs115920192_A	12832.9	12833.8	0.289117	0.376262	0.380572	0.456131	0.411786	0.513645
6	rs114014227	0	30099846	A	G	1717	rs114014227_A	12832.9	12817	2.38258e-05	0.000359773	0.00406446	8.632e-05	0.0190956	0.0177182
6	rs114472966	0	30099906	A	G	1718	rs114472966_A	12832.9	12833.8	0.29229	0.507379	0.362448	0.297961	0.321735	0.217366
6	rs115059203	0	30100240	A	G	1719	rs115059203_A	12832.3	12832.3	0.15206	0.208771	0.411592	0.325063	0.480357	0.388377
6	rs1150743	0	30100240	A	G	1720	rs1150743_A	12832.9	12832.8	0.151338	0.208055	0.410531	0.324162	0.47943	0.38752
6	rs115450853	0	30100265	A	G	1721	rs115450853_A	12832.3	12833.2	0.288354	0.375515	0.37985	0.455483	0.411272	0.513033
6	rs114665269	0	30100593	A	G	1722	rs114665269_A	12832.9	12831.6	0.0696269	0.164676	0.0873552	0.266116	0.266047	0.153476
6	rs115509202	0	30100716	A	G	1723	rs115509202_A	12832.9	12834.4	0.469428	0.0802923	0.145698	0.0926099	0.291897	0.30599
6	rs116045781	0	30100744	G	A	1724	rs116045781_G	12831.7	12833.2	0.476166	0.0818433	0.148073	0.0942253	0.297528	0.312299
6	rs114062315	0	30100952	A	G	1725	rs114062315_A	12831.7	12832.6	0.295965	0.382777	0.386839	0.465196	0.421078	0.524299
6	rs116393526	0	30101065	G	A	1726	rs116393526_G	12832.9	12833.8	0.289117	0.376262	0.380572	0.456131	0.411786	0.513645
6	rs115138973	0	30101175	C	G	1727	rs115138973_C	12832.9	12834.4	0.469428	0.0802923	0.145698	0.0926099	0.291897	0.30599
6	rs166325	0	30101175	C	G	1728	rs166325_C	12832.9	12834.4	0.469428	0.0802923	0.145698	0.0926099	0.291897	0.30599
6	rs115562990	0	30104100	G	A	1729	rs115562990_G	12832.9	12833.8	0.289117	0.376262	0.380572	0.456131	0.411786	0.513645
6	rs114360473	0	30104234	G	A	1730	rs114360473_G	12832.3	12828.4	0.0150965	0.0487013	0.0476578	0.24971	0.41138	0.211032
6	rs116483615	0	30106161	G	A	1731	rs116483615_G	12832.9	12834.5	0.52092	0.656199	0.488483	0.738445	0.777455	0.524283
6	rs116155752	0	30106239	A	G	1732	rs116155752_A	12832.9	12833.8	0.289117	0.376262	0.380572	0.456131	0.411786	0.513645
6	rs115931681	0	30106630	G	C	1733	rs115931681_G	12832.9	12834.4	0.488392	0.619955	0.456923	0.699758	0.738708	0.491475
6	rs114194707	0	30106851	A	G	1734	rs114194707_A	12830.1	12831.4	0.397671	0.525538	0.625245	0.58945	0.989062	0.759213
6	rs9261185	0	30107230	G	A	1735	rs9261185_G	12832.9	12834.5	0.52092	0.656199	0.488483	0.738445	0.777455	0.524283
6	rs114799689	0	30108499	A	C	1736	rs114799689_A	12811.1	12809.1	0.0446791	0.0212749	0.0796694	0.0050733	0.110984	0.240892
6	rs9261190	0	30108693	G	A	1737	rs9261190_G	12832.3	12833.4	0.348548	0.469741	0.564335	0.527255	0.91558	0.689223
6	rs115438899	0	30108702	A	G	1738	rs115438899_A	12832.9	12831.6	0.0696269	0.164676	0.0873552	0.266116	0.266047	0.153476
6	rs114566308	0	30108952	C	A	1739	rs114566308_C	12830.1	12829.2	0.085007	0.197695	0.108145	0.313818	0.310307	0.185846
6	rs10947046	0	30108952	C	A	1740	rs10947046_C	12809.5	12809.2	0.125563	0.267258	0.160544	0.384201	0.376413	0.227341
6	rs113995577	0	30109682	A	G	1741	rs113995577_A	12832.9	12831.6	0.068343	0.135993	0.0986347	0.0996402	0.385886	0.486497
6	rs116465145	0	30109749	G	A	1742	rs116465145_G	12832.9	12834.4	0.469428	0.0802923	0.145698	0.0926099	0.291897	0.30599
6	rs116792403	0	30109929	A	G	1743	rs116792403_A	12832.9	12833.8	0.289117	0.366814	0.37181	0.447217	0.40529	0.50615
6	rs115227030	0	30110031	G	A	1744	rs115227030_G	12832.9	12827.6	0.00689945	0.0252623	0.0560375	0.00658113	0.136034	0.156747
6	rs116642932	0	30110152	G	A	1745	rs116642932_G	12832.9	12833.8	0.289117	0.376262	0.380572	0.456131	0.411786	0.513645
6	rs115656811	0	30110420	C	G	1746	rs115656811_C	12832.9	12830.7	0.0395799	0.0195755	0.0733042	0.00447175	0.0987737	0.217706
6	rs115223080	0	30110772	C	G	1747	rs115223080_C	12832.9	12828.9	0.0147411	0.0474058	0.0464577	0.245819	0.405091	0.20666
6	rs3121593	0	30110772	C	G	1748	rs3121593_C	12832.3	12828.3	0.0146237	0.0471235	0.0461928	0.244836	0.403651	0.206193
6	rs115032519	0	30110860	G	A	1749	rs115032519_G	12832.9	12832	0.0890156	0.144561	0.289268	0.0461156	0.269523	0.484092
6	rs166327	0	30110860	G	A	1750	rs166327_G	12832.9	12832	0.0890156	0.144561	0.289268	0.0461156	0.269523	0.484092
6	rs116735891	0	30110921	A	G	1751	rs116735891_A	12832.9	12834.4	0.496531	0.62721	0.462902	0.708881	0.746997	0.498463
6	rs114374251	0	30111089	G	A	1752	rs114374251_G	12832.9	12834.5	0.52092	0.656199	0.488483	0.738445	0.777455	0.524283
6	rs114927984	0	30111284	A	G	1753	rs114927984_A	12827.4	12829	0.535817	0.670964	0.50151	0.754699	0.794903	0.539484
6	rs9261200	0	30111284	A	G	1754	rs9261200_A	12829	12830.5	0.510949	0.642794	0.477097	0.724297	0.764025	0.512351
6	rs116167601	0	30111743	G	A	1755	rs116167601_G	12832.9	12824.4	0.00123455	0.00921324	0.00318293	0.0142343	0.00578977	0.00635192
6	rs115503816	0	30111776	G	A	1756	rs115503816_G	12832.9	12834.4	0.496531	0.62721	0.462902	0.708881	0.746997	0.498463
6	rs114230713	0	30112031	A	G	1757	rs114230713_A	12832.9	12834.4	0.496531	0.62721	0.462902	0.708881	0.746997	0.498463
6	rs3869068	0	30112031	A	G	1758	rs3869068_A	12832.9	12834.4	0.496531	0.62721	0.462902	0.708881	0.746997	0.498463
6	rs116555976	0	30112165	G	C	1759	rs116555976_G	12832.9	12834.4	0.469428	0.0802923	0.145698	0.0926099	0.291897	0.30599
6	rs116044290	0	30112238	G	A	1760	rs116044290_G	12832.9	12834.4	0.496531	0.62721	0.462902	0.708881	0.746997	0.498463
6	rs116339860	0	30112350	T	A	1761	rs116339860_T	12832.9	12827.5	0.00671465	0.0258032	0.0585919	0.0069285	0.14137	0.165448
6	rs259931	0	30112350	T	A	1762	rs259931_T	12832.9	12827.6	0.00687895	0.0262345	0.0594259	0.00705344	0.142889	0.166664
6	rs115329622	0	30112677	G	A	1763	rs115329622_G	12832.3	12831	0.0699126	0.165411	0.0877878	0.266651	0.266528	0.153811
6	rs115715853	0	30113022	G	A	1764	rs115715853_G	12832.9	12833.7	0.281366	0.36886	0.373442	0.448292	0.405297	0.508288
6	rs116555982	0	30113284	A	G	1765	rs116555982_A	12832.9	12830	0.0275072	0.0676015	0.117505	0.0204266	0.177115	0.251058
6	rs114218355	0	30113290	G	A	1766	rs114218355_G	12832.9	12834.5	0.52092	0.656199	0.488483	0.738445	0.777455	0.524283
6	rs116373137	0	30113733	A	C	1767	rs116373137_A	12832.9	12830.4	0.0343317	0.0151396	0.104951	0.0153184	0.110349	0.139939
6	rs4711207	0	30113733	A	C	1768	rs4711207_A	12816.3	12813.8	0.0327533	0.0142411	0.100719	0.0144689	0.10387	0.132545
6	rs115337808	0	30114461	G	A	1769	rs115337808_G	12830.1	12830.9	0.266426	0.350651	0.353864	0.42824	0.386384	0.48475
6	rs115966004	0	30114491	C	A	1770	rs115966004_C	12832.3	12831	0.0672623	0.160936	0.0851672	0.260022	0.259525	0.149029
6	rs115678795	0	30114744	A	G	1771	rs115678795_A	12829.5	12827.1	0.0341414	0.0152513	0.105739	0.015274	0.1094	0.138902
6	rs9405044	0	30114744	A	G	1772	rs9405044_A	12821.4	12818.9	0.0325885	0.0141205	0.100026	0.0139857	0.101244	0.129912
6	rs116571013	0	30114784	A	G	1773	rs116571013_A	12832.9	12831.6	0.068343	0.135993	0.0986347	0.0996402	0.385886	0.486497
6	rs115130701	0	30114855	A	G	1774	rs115130701_A	12832.9	12827.5	0.00670291	0.0257747	0.0585443	0.00695016	0.141424	0.164759
6	rs114329002	0	30115030	A	G	1775	rs114329002_A	12832.3	12829.4	0.0265622	0.0659409	0.115026	0.0199546	0.173777	0.246241
6	rs259935	0	30115030	A	G	1776	rs259935_A	12832.9	12830	0.0263662	0.0656165	0.114538	0.0198415	0.173344	0.245665
6	rs115488962	0	30115095	G	A	1777	rs115488962_G	12832.9	12831.6	0.0696269	0.164676	0.0873552	0.266116	0.266047	0.153476
6	rs116335674	0	30115472	G	A	1778	rs116335674_G	12832.9	12834.4	0.469428	0.0802923	0.145698	0.0926099	0.291897	0.30599
6	rs259937	0	30115472	G	A	1779	rs259937_G	12832.9	12834.4	0.469428	0.0802923	0.145698	0.0926099	0.291897	0.30599
6	rs115677244	0	30115690	A	G	1780	rs115677244_A	12832.9	12831.6	0.0696269	0.164676	0.0873552	0.266116	0.266047	0.153476
6	rs115141117	0	30115963	A	G	1781	rs115141117_A	12832.9	12831.5	0.0669857	0.160527	0.0849244	0.259137	0.258576	0.148395
6	rs259938	0	30115982	C	G	1782	rs259938_C	12832.9	12830	0.0275379	0.0671389	0.116835	0.0205681	0.177492	0.25099
6	rs114592530	0	30116022	A	G	1783	rs114592530_A	12832.9	12830.2	0.030605	0.0441548	0.0229384	0.0960387	0.554532	0.489749
6	rs6915205	0	30116022	A	G	1784	rs6915205_A	12832.9	12830.2	0.030605	0.0441548	0.0229384	0.0960387	0.554532	0.489749
6	rs114740580	0	30116725	C	A	1785	rs114740580_C	12832.9	12830.4	0.0350545	0.0155743	0.107055	0.0157177	0.11302	0.143367
6	rs3910312	0	30116725	C	A	1786	rs3910312_C	12832.9	12830.4	0.0350545	0.0155743	0.107055	0.0157177	0.11302	0.143367
6	rs115537614	0	30116975	G	A	1787	rs115537614_G	12832.9	12829	0.0156658	0.0499637	0.0488438	0.255117	0.419395	0.216163
6	rs115984845	0	30117588	G	A	1788	rs115984845_G	12831.7	12832.6	0.287593	0.374444	0.378835	0.454243	0.410019	0.5116
6	rs114653275	0	30117643	G	A	1789	rs114653275_G	12832.9	12831.6	0.0696269	0.164676	0.0873552	0.266116	0.266047	0.153476
6	rs9261215	0	30117758	C	A	1790	rs9261215_C	12832.3	12833.5	0.359394	0.475212	0.570186	0.535244	0.921028	0.694679
6	rs9261215	0	30117758	C	A	1791	rs9261215_C.1	12831.7	12832.9	0.360223	0.476605	0.571612	0.536816	0.923652	0.697136
6	rs116549889	0	30118118	G	A	1792	rs116549889_G	12832.9	12834.4	0.496531	0.62721	0.462902	0.708881	0.746997	0.498463
6	rs116676427	0	30118471	G	A	1793	rs116676427_G	12832.3	12829.8	0.0347056	0.0149585	0.103676	0.0151012	0.11035	0.140469
6	rs9380150	0	30118471	G	A	1794	rs9380150_G	12832.9	12830.6	0.038557	0.0166607	0.111647	0.0166623	0.116948	0.145648
6	rs116311506	0	30118487	G	A	1795	rs116311506_G	12832.9	12834.4	0.496531	0.62721	0.462902	0.708881	0.746997	0.498463
6	rs115154095	0	30118869	G	A	1796	rs115154095_G	12832.3	12831	0.0699126	0.165401	0.0877818	0.267018	0.267017	0.154117
6	rs115527186	0	30118936	A	G	1797	rs115527186_A	12832.9	12834.4	0.469428	0.0802923	0.145698	0.0926099	0.291897	0.30599
6	rs116147869	0	30119254	A	G	1798	rs116147869_A	12832.9	12833.8	0.289117	0.376262	0.380572	0.456131	0.411786	0.513645
6	rs115297621	0	30119430	A	G	1799	rs115297621_A	12832.9	12834.2	0.402865	0.545921	0.54229	0.61354	0.5461	0.602875
6	rs116537348	0	30119560	G	A	1800	rs116537348_G	12832.9	12830.1	0.0286888	0.0701579	0.121746	0.0215461	0.183864	0.259196
6	rs259939	0	30119560	G	A	1801	rs259939_G	12832.9	12830.1	0.0286888	0.0701579	0.121746	0.0215461	0.183864	0.259196
6	rs114931069	0	30119781	A	C	1802	rs114931069_A	12832.3	12834	0.550636	0.55511	0.629522	0.411033	0.271817	0.509436
6	rs11965452	0	30119781	A	C	1803	rs11965452_A	12829.5	12831.2	0.553264	0.557967	0.632641	0.412962	0.273278	0.511011
6	rs115930919	0	30119842	A	C	1804	rs115930919_A	12832.9	12833.8	0.289117	0.376262	0.380572	0.456131	0.411786	0.513645
6	rs259940	0	30119913	G	A	1805	rs259940_G	12829.5	12824.2	0.0067444	0.0246923	0.0548772	0.00644384	0.134127	0.154629
6	rs115133546	0	30120319	A	G	1806	rs115133546_A	12832.9	12831.6	0.0696269	0.164676	0.0873552	0.266116	0.266047	0.153476
6	rs114315683	0	30120603	A	G	1807	rs114315683_A	12832.9	12831.6	0.068343	0.135993	0.0986347	0.0996402	0.385886	0.486497
6	rs116450598	0	30120739	G	A	1808	rs116450598_G	12825.5	12824	0.0627824	0.127288	0.0921026	0.0928752	0.37023	0.467427
6	rs114803444	0	30121751	G	A	1809	rs114803444_G	12832.9	12833.8	0.289117	0.376262	0.380572	0.456131	0.411786	0.513645
6	rs115430143	0	30121866	A	G	1810	rs115430143_A	12832.9	12833.5	0.239223	0.302464	0.339672	0.284124	0.190422	0.371347
6	rs116000261	0	30122436	A	G	1811	rs116000261_A	12832.9	12833.8	0.289117	0.376262	0.380572	0.456131	0.411786	0.513645
6	rs115119809	0	30122646	G	A	1812	rs115119809_G	12830.1	12830.5	0.207624	0.262309	0.29543	0.244645	0.163014	0.325134
6	rs114460244	0	30123146	A	G	1813	rs114460244_A	12832.9	12832	0.0919447	0.0261598	0.0519477	0.0479332	0.0853651	0.150586
6	rs259942	0	30123146	A	G	1814	rs259942_A	12832.9	12832	0.0919447	0.0261598	0.0519477	0.0479332	0.0853651	0.150586
6	rs116127162	0	30123309	G	A	1815	rs116127162_G	12832.3	12827.1	0.00732852	0.0276502	0.0623874	0.00757835	0.149474	0.17366
6	rs259943	0	30123309	G	A	1816	rs259943_G	12832.3	12827.1	0.00715453	0.0271989	0.0605556	0.00731737	0.145851	0.169344
6	rs115677230	0	30123573	A	C	1817	rs115677230_A	12812.4	12810.3	0.0440215	0.0198511	0.128871	0.0202297	0.136994	0.171063
6	rs116725370	0	30123706	A	C	1818	rs116725370_A	12831.7	12832.9	0.370708	0.491403	0.586881	0.554622	0.948433	0.720748
6	rs116295763	0	30123884	G	A	1819	rs116295763_G	12830.1	12830	0.148329	0.0707899	0.195591	0.0220397	0.344923	0.456019
6	rs3134879	0	30123884	G	A	1820	rs3134879_G	12829.5	12829.5	0.148685	0.0709615	0.195942	0.0221009	0.34577	0.457146
6	rs114193724	0	30124276	C	A	1821	rs114193724_C	12832.9	12831.6	0.0696269	0.164676	0.0873552	0.266116	0.266047	0.153476
6	rs6457138	0	30124276	C	A	1822	rs6457138_C	12832.9	12831.6	0.0696269	0.164676	0.0873552	0.266116	0.266047	0.153476
6	rs114959639	0	30124360	C	A	1823	rs114959639_C	12757.5	12757.9	0.209855	0.257601	0.298995	0.24894	0.17421	0.332868
6	rs115826761	0	30124552	G	A	1824	rs115826761_G	12832.9	12833.8	0.289117	0.376262	0.380572	0.456131	0.411786	0.513645
6	rs116519681	0	30124789	A	T	1825	rs116519681_A	12821.1	12821.5	0.202572	0.250092	0.282035	0.238905	0.162226	0.322778
6	rs12208727	0	30125010	G	A	1826	rs12208727_G	12832.9	12832.3	0.106052	0.0965174	0.127907	0.119915	0.161981	0.140871
6	rs115721109	0	30125608	A	T	1827	rs115721109_A	12795.6	12796	0.215428	0.262944	0.257367	0.311582	0.274672	0.343532
6	rs114061475	0	30125735	G	A	1828	rs114061475_G	12832.9	12834.4	0.469428	0.0802923	0.145698	0.0926099	0.291897	0.30599
6	rs114607954	0	30125738	G	A	1829	rs114607954_G	12832.9	12833.4	0.221666	0.280189	0.31516	0.262186	0.1749	0.344763
6	rs259945	0	30127185	T	A	1830	rs259945_T	12832.9	12833.8	0.294381	0.864512	0.78831	0.849394	0.59833	0.5908
6	rs116726751	0	30127623	A	C	1831	rs116726751_A	12832.9	12834.1	0.36902	0.488905	0.584332	0.551711	0.945999	0.718431
6	rs116794496	0	30127748	A	T	1832	rs116794496_A	12831.7	12832.2	0.215175	0.273997	0.308727	0.256364	0.169256	0.337058
6	rs115499203	0	30128024	A	G	1833	rs115499203_A	12832.9	12833.6	0.265666	0.910096	0.741679	0.896731	0.559336	0.553331
6	rs114547882	0	30129728	A	G	1834	rs114547882_A	12832.9	12830	0.0268132	0.000537635	0.00547869	0.000614699	0.00662649	0.00644613
6	rs115696625	0	30129920	C	G	1835	rs115696625_C	12832.9	12833.5	0.239223	0.302464	0.339672	0.284124	0.190422	0.371347
6	rs114604263	0	30130132	A	G	1836	rs114604263_A	12832.3	12832.9	0.238353	0.301238	0.33842	0.283335	0.189754	0.370353
6	rs7761314	0	30130132	A	G	1837	rs7761314_A	12832.9	12833.5	0.239223	0.302464	0.339672	0.284124	0.190422	0.371347
6	rs116703179	0	30130557	A	G	1838	rs116703179_A	12832.9	12833.5	0.243895	0.952058	0.701813	0.94166	0.518204	0.512537
6	rs114294537	0	30130577	G	A	1839	rs114294537_G	12832.9	12831.6	0.068343	0.135993	0.0986347	0.0996402	0.385886	0.486497
6	rs115230033	0	30130736	G	A	1840	rs115230033_G	12831.7	12832.8	0.347437	0.200558	0.202624	0.337226	0.815673	0.817221
6	rs114439499	0	30130787	A	G	1841	rs114439499_A	12832.9	12833.5	0.239223	0.302464	0.339672	0.284124	0.190422	0.371347
6	rs114490207	0	30131058	G	A	1842	rs114490207_G	12802.6	12786.3	1.96067e-05	0.000306807	0.00358039	7.29298e-05	0.0171023	0.0155446
6	rs114374550	0	30131847	G	A	1843	rs114374550_G	12828.8	12826.3	0.0335671	0.0291782	0.0939545	0.0264406	0.0760728	0.0877394
6	rs3869070	0	30131847	G	A	1844	rs3869070_G	12832.9	12830.5	0.036094	0.0312584	0.0992015	0.0283448	0.0803466	0.0927855
6	rs114898901	0	30132242	A	G	1845	rs114898901_A	12832.9	12824.4	0.00118709	0.00913434	0.00296841	0.0119844	0.00418539	0.00514431
6	rs112048132	0	30132344	G	A	1846	rs112048132_G	12825	12825.2	0.176275	0.222568	0.251647	0.206065	0.131277	0.273187
6	rs9261261	0	30132344	G	A	1847	rs9261261_G	12832.3	12833	0.244199	0.309644	0.346965	0.290331	0.194677	0.378635
6	rs6928431	0	30132363	T	A	1848	rs6928431_T	12832.9	12828.8	0.0133632	0.0432966	0.0423412	0.227164	0.378356	0.190606
6	rs116298703	0	30132373	A	G	1849	rs116298703_A	12832.9	12833.5	0.239223	0.302464	0.339672	0.284124	0.190422	0.371347
6	rs116456685	0	30132656	A	G	1850	rs116456685_A	12832.9	12829.3	0.0179487	0.0149195	0.1054	0.0594558	0.0568397	0.0286511
6	rs9366752	0	30132656	A	G	1851	rs9366752_A	12832.9	12829.3	0.0179487	0.0149195	0.1054	0.0594558	0.0568397	0.0286511
6	rs116793054	0	30132728	C	G	1852	rs116793054_C	12832.9	12833.8	0.289117	0.376262	0.380572	0.456131	0.411786	0.513645
6	rs116604614	0	30133081	A	G	1853	rs116604614_A	12832.9	12829.6	0.0211191	0.0186835	0.0169617	0.0195067	0.0124477	0.0140172
6	rs116648556	0	30133158	A	G	1854	rs116648556_A	12832.9	12833.5	0.239223	0.302464	0.339672	0.284124	0.190422	0.371347
6	rs6911724	0	30133158	A	G	1855	rs6911724_A	12832.9	12833.5	0.239223	0.302464	0.339672	0.284124	0.190422	0.371347
6	rs115527824	0	30133189	G	A	1856	rs115527824_G	12832.9	12833.8	0.289117	0.376262	0.380572	0.456131	0.411786	0.513645
6	rs114518910	0	30133264	A	G	1857	rs114518910_A	12832.9	12833.1	0.182633	0.243942	0.298359	0.254215	0.166754	0.340199
6	rs116217801	0	30133482	A	G	1858	rs116217801_A	12832.9	12827.9	0.00825761	0.0510379	0.094313	0.055426	0.124519	0.0680796
6	rs259919	0	30133482	A	G	1859	rs259919_A	12832.9	12827.9	0.00825761	0.0510379	0.094313	0.055426	0.124519	0.0680796
6	rs115942806	0	30133628	G	A	1860	rs115942806_G	12832.9	12830.6	0.0393572	0.104889	0.0517396	0.152694	0.100186	0.0510882
6	rs115694442	0	30133738	A	G	1861	rs115694442_A	12832.9	12834.4	0.469428	0.0802923	0.145698	0.0926099	0.291897	0.30599
6	rs116154879	0	30133963	C	G	1862	rs116154879_C	12832.9	12833.4	0.221959	0.280867	0.315849	0.263952	0.17511	0.346784
6	rs115928788	0	30134125	G	A	1863	rs115928788_G	12832.9	12830.4	0.0345915	0.0495024	0.025921	0.105291	0.584149	0.519414
6	rs16896944	0	30134125	G	A	1864	rs16896944_G	12832.9	12830.4	0.0345915	0.0495024	0.025921	0.105291	0.584149	0.519414
6	rs17187553	0	30134143	G	A	1865	rs17187553_G	12832.9	12833.7	0.271518	0.611758	0.51212	0.671	0.402132	0.349824
6	rs116688368	0	30134215	A	G	1866	rs116688368_A	12832.9	12834.8	0.743576	0.855802	0.974172	0.773607	0.838029	0.975651
6	rs114555753	0	30134269	G	A	1867	rs114555753_G	12831.7	12830.5	0.0739904	0.145466	0.105655	0.105167	0.399272	0.501059
6	rs10484549	0	30134269	G	A	1868	rs10484549_G	12832.9	12831.7	0.0733391	0.144617	0.105015	0.104454	0.398087	0.49998
6	rs115131202	0	30134329	G	A	1869	rs115131202_G	12832.9	12833.8	0.289117	0.376262	0.380572	0.456131	0.411786	0.513645
6	rs115324207	0	30134410	A	C	1870	rs115324207_A	12832.9	12823.5	0.000721599	0.00656408	0.00195797	0.0082291	0.00287167	0.0035751
6	rs114269250	0	30134747	A	G	1871	rs114269250_A	12832.9	12831.6	0.068343	0.135993	0.0986347	0.0996402	0.385886	0.486497
6	rs116556453	0	30135392	A	G	1872	rs116556453_A	12820.5	12821.1	0.233591	0.284567	0.326693	0.27897	0.178942	0.358422
6	rs116055884	0	30135431	C	G	1873	rs116055884_C	12832.3	12828.3	0.0140973	0.0463691	0.0451556	0.240694	0.398496	0.203121
6	rs114579793	0	30135839	A	G	1874	rs114579793_A	12819.8	12815.4	0.0109892	0.0428867	0.0616375	0.237916	0.328539	0.16347
6	rs3132129	0	30135839	A	G	1875	rs3132129_A	12813.9	12807.7	0.00418142	0.0192171	0.0289104	0.131914	0.195167	0.0856946
6	rs115146597	0	30136331	A	G	1876	rs115146597_A	12832.9	12834.5	0.55152	0.55582	0.630247	0.411365	0.271997	0.509612
6	rs3757328	0	30136331	A	G	1877	rs3757328_A	12832.9	12834.5	0.55152	0.55582	0.630247	0.411365	0.271997	0.509612
6	rs115459021	0	30136403	C	A	1878	rs115459021_C	12826.2	12826.6	0.201419	0.254343	0.284333	0.238791	0.163131	0.32782
6	rs3757329	0	30136403	C	A	1879	rs3757329_C	12832.9	12833.5	0.239223	0.302464	0.339672	0.284124	0.190422	0.371347
6	rs114225239	0	30136456	G	A	1880	rs114225239_G	12832.9	12833.8	0.289117	0.376262	0.380572	0.456131	0.411786	0.513645
6	rs114182975	0	30136531	A	G	1881	rs114182975_A	12832.9	12834.1	0.36902	0.488905	0.584332	0.551711	0.945999	0.718431
6	rs116452070	0	30136585	A	C	1882	rs116452070_A	12832.9	12834.5	0.522228	0.532366	0.606259	0.393191	0.258718	0.487665
6	rs3757333	0	30136585	A	C	1883	rs3757333_A	12832.9	12834.5	0.55152	0.55582	0.630247	0.411365	0.271997	0.509612
6	rs115999600	0	30136779	G	A	1884	rs115999600_G	12829.5	12827	0.0333963	0.0145426	0.102312	0.0146246	0.105873	0.135953
6	rs7769930	0	30136786	C	A	1885	rs7769930_C	12832.9	12833.4	0.221959	0.280867	0.315849	0.263952	0.17511	0.346784
6	rs1150742	0	30136810	G	A	1886	rs1150742_G	12832.9	12827.8	0.00780622	0.0291405	0.0655048	0.00803466	0.155403	0.18029
6	rs7770505	0	30136892	A	G	1887	rs7770505_A	12832.9	12833.9	0.315423	0.409886	0.406246	0.486435	0.442089	0.546967
6	rs116676006	0	30137088	G	C	1888	rs116676006_G	12827.4	12827.7	0.194507	0.245851	0.281733	0.232943	0.151015	0.307599
6	rs7770557	0	30137088	G	C	1889	rs7770557_G	12832.9	12833.4	0.221959	0.280867	0.315849	0.263952	0.17511	0.346784
6	rs114359799	0	30137238	C	G	1890	rs114359799_C	12832.9	12834.8	0.828158	0.599754	0.591612	0.421399	0.395529	0.439281
6	rs114670809	0	30137322	A	C	1891	rs114670809_A	12832.9	12834.3	0.436598	0.84982	0.736099	0.882875	0.586245	0.480651
6	rs115299819	0	30138036	A	G	1892	rs115299819_A	12832.9	12833.8	0.289117	0.376262	0.380572	0.456131	0.411786	0.513645
6	rs114191643	0	30138093	A	G	1893	rs114191643_A	12830.1	12825.9	0.0123932	0.0409092	0.0398929	0.219316	0.367377	0.183357
6	rs111406620	0	30138114	A	G	1894	rs111406620_A	12832.9	12833.6	0.264294	0.348272	0.351391	0.420369	0.377144	0.473005
6	rs116052764	0	30138168	A	T	1895	rs116052764_A	12832.9	12833.8	0.289117	0.376262	0.380572	0.456131	0.411786	0.513645
6	rs116765795	0	30138668	A	C	1896	rs116765795_A	12824.6	12825.5	0.302051	0.838365	0.813438	0.823759	0.618014	0.613307
6	rs1150740	0	30138668	A	C	1897	rs1150740_A	12824.6	12825.5	0.290187	0.864796	0.7964	0.844078	0.599959	0.593311
6	rs114897040	0	30138768	A	G	1898	rs114897040_A	12832.9	12833.5	0.239223	0.302464	0.339672	0.284124	0.190422	0.371347
6	rs9261275	0	30138907	A	G	1899	rs9261275_A	12832.9	12833.5	0.23376	0.296989	0.334011	0.27789	0.185465	0.363195
6	rs114059138	0	30139038	A	G	1900	rs114059138_A	12832.9	12833.8	0.289117	0.376262	0.380572	0.456131	0.411786	0.513645
6	rs114622275	0	30139070	G	A	1901	rs114622275_G	12831.1	12831.8	0.248356	0.313497	0.350929	0.293744	0.197568	0.378885
6	rs1150739	0	30139324	G	A	1902	rs1150739_G	12832.3	12826.9	0.00637134	0.0220196	0.0457966	0.00541795	0.0469951	0.115705
6	rs114331393	0	30139341	A	G	1903	rs114331393_A	12832.9	12833.5	0.233464	0.294188	0.331233	0.27578	0.183737	0.360611
6	rs114705281	0	30139435	A	G	1904	rs114705281_A	12832.9	12831.6	0.068343	0.135993	0.0986347	0.0996402	0.385886	0.486497
6	rs115856529	0	30140298	G	C	1905	rs115856529_G	12832.9	12834.5	0.530623	0.692386	0.692503	0.620695	0.694185	0.777527
6	rs116149953	0	30140474	G	A	1906	rs116149953_G	12832.9	12834.5	0.545925	0.682329	0.512104	0.767293	0.807877	0.549926
6	rs116480994	0	30140501	C	A	1907	rs116480994_C	12832.3	12817.3	3.62742e-05	0.00119051	0.00745518	8.18914e-06	0.00208383	0.00333376
6	rs8321	0	30140501	C	A	1908	rs8321_C	12832.9	12817.8	3.49286e-05	0.00116243	0.00731041	7.93457e-06	0.00204566	0.00327355
6	rs114739617	0	30140652	G	A	1909	rs114739617_G	12832.9	12833.1	0.178471	0.344054	0.196389	0.505748	0.510862	0.338159
6	rs3188482	0	30140652	G	A	1910	rs3188482_G	12831.7	12831.9	0.179652	0.345442	0.197311	0.508444	0.513524	0.340266
6	rs116253474	0	30140896	G	A	1911	rs116253474_G	12830.1	12829.1	0.0821096	0.157872	0.116366	0.11797	0.432103	0.537674
6	rs114805406	0	30141451	G	A	1912	rs114805406_G	12832.9	12828.9	0.0143166	0.0464565	0.0455661	0.241969	0.402779	0.206121
6	rs116674671	0	30141669	A	C	1913	rs116674671_A	12832.9	12833.8	0.297517	0.384302	0.38831	0.462594	0.418366	0.519395
6	rs3807030	0	30141669	A	C	1914	rs3807030_A	12832.9	12833.8	0.297517	0.384302	0.38831	0.462594	0.418366	0.519395
6	rs116131149	0	30141863	A	C	1915	rs116131149_A	12832.3	12829.7	0.0316798	0.0096386	0.0655057	0.0109414	0.053873	0.0923284
6	rs3807031	0	30141863	A	C	1916	rs3807031_A	12832.3	12829.7	0.0316798	0.0096386	0.0655057	0.0109414	0.053873	0.0923284
6	rs116034860	0	30142163	G	A	1917	rs116034860_G	12832.9	12834.1	0.36902	0.488905	0.584332	0.551711	0.945999	0.718431
6	rs114346141	0	30142268	G	A	1918	rs114346141_G	12832.9	12834.8	0.755156	0.865322	0.964949	0.780315	0.830707	0.966949
6	rs114594700	0	30143068	A	C	1919	rs114594700_A	12832.9	12833.6	0.265666	0.914504	0.737825	0.902922	0.550797	0.544889
6	rs115497578	0	30143320	A	G	1920	rs115497578_A	12831.1	12833	0.740663	0.860639	0.894954	0.948989	0.511588	0.885393
6	rs114813595	0	30143486	T	A	1921	rs114813595_T	12832.3	12833.9	0.530295	0.692049	0.692181	0.620501	0.693974	0.777318
6	rs115679178	0	30143784	T	A	1922	rs115679178_T	12832.9	12833.8	0.297517	0.384302	0.38831	0.462594	0.418366	0.519395
6	rs116147561	0	30144062	A	C	1923	rs116147561_A	12832.9	12833.8	0.297517	0.384302	0.38831	0.462594	0.418366	0.519395
6	rs9261285	0	30144062	A	C	1924	rs9261285_A	12832.9	12833.8	0.297517	0.384302	0.38831	0.462594	0.418366	0.519395
6	rs114999050	0	30144248	G	A	1925	rs114999050_G	12832.9	12833.8	0.297517	0.384302	0.38831	0.462594	0.418366	0.519395
6	rs115051271	0	30144312	G	C	1926	rs115051271_G	12832.3	12831	0.0686496	0.136401	0.098941	0.100028	0.386545	0.48725
6	rs116620177	0	30144450	A	C	1927	rs116620177_A	12829.5	12831.1	0.493317	0.622782	0.458898	0.703085	0.740155	0.494693
6	rs2074482	0	30144450	A	C	1928	rs2074482_A	12829.5	12831.1	0.493317	0.622784	0.4589	0.703693	0.740825	0.495257
6	rs17187707	0	30144507	G	A	1929	rs17187707_G	12827.8	12828.4	0.241285	0.311875	0.335534	0.13502	0.357162	0.23598
6	rs114117899	0	30144549	G	A	1930	rs114117899_G	12832.9	12833.8	0.297517	0.384302	0.38831	0.462594	0.418366	0.519395
6	rs116449930	0	30145332	A	G	1931	rs116449930_A	12832.3	12833.5	0.369864	0.489667	0.585123	0.552652	0.947399	0.719763
6	rs9261288	0	30145332	A	G	1932	rs9261288_A	12832.9	12834.1	0.36902	0.488905	0.584332	0.551711	0.945999	0.718431
6	rs115822288	0	30145595	A	C	1933	rs115822288_A	12832.9	12834.1	0.36902	0.488905	0.584332	0.551711	0.945999	0.718431
6	rs115882910	0	30145696	C	A	1934	rs115882910_C	12832.9	12832.8	0.148762	0.134149	0.12787	0.146572	0.0698064	0.0983402
6	rs116710187	0	30145969	G	A	1935	rs116710187_G	12832.9	12828.8	0.0138372	0.0454779	0.0443379	0.239505	0.398788	0.204828
6	rs1245371	0	30146331	G	A	1936	rs1245371_G	12830.1	12824.2	0.00500658	0.0193986	0.040784	0.00482248	0.113167	0.130455
6	rs116714959	0	30146362	C	G	1937	rs116714959_C	12832.3	12826.7	0.00585131	0.0161973	0.00634525	0.015917	0.015292	0.00602681
6	rs115497370	0	30146626	G	A	1938	rs115497370_G	12832.9	12817.4	2.89417e-05	0.000993284	0.00599124	5.65404e-06	0.0016118	0.00260215
6	rs9261290	0	30146626	G	A	1939	rs9261290_G	12832.9	12817.4	2.89417e-05	0.000993284	0.00599124	5.65404e-06	0.0016118	0.00260215
6	rs114577955	0	30146691	A	G	1940	rs114577955_A	12775.5	12777.4	0.738843	0.887489	0.679527	0.950463	0.9955	0.723582
6	rs9261291	0	30146691	A	G	1941	rs9261291_A	12779.9	12780.4	0.225911	0.306682	0.200224	0.364214	0.392252	0.226561
6	rs115037604	0	30146802	G	A	1942	rs115037604_G	12832.9	12831.7	0.0723516	0.168904	0.0898411	0.269917	0.269333	0.156185
6	rs115745708	0	30147219	A	C	1943	rs115745708_A	12808.9	12810.8	0.679141	0.826888	0.653988	0.912539	0.945716	0.672849
6	rs2301753	0	30147219	A	C	1944	rs2301753_A	12830.1	12831.7	0.524345	0.658335	0.489888	0.739405	0.778171	0.525417
6	rs114516919	0	30147463	A	G	1945	rs114516919_A	12831.7	12832.6	0.287593	0.374116	0.378536	0.453931	0.409719	0.511258
6	rs2301751	0	30147463	A	G	1946	rs2301751_A	12832.9	12833.8	0.289117	0.376262	0.380572	0.456131	0.411786	0.513645
6	rs114102189	0	30147546	A	T	1947	rs114102189_A	12832.9	12831.7	0.0723516	0.168904	0.0898411	0.269917	0.269333	0.156185
6	rs115082201	0	30147620	G	A	1948	rs115082201_G	12832.9	12834.4	0.50474	0.634495	0.46892	0.713751	0.75128	0.502861
6	rs114315771	0	30147671	A	G	1949	rs114315771_A	12832.9	12834.8	0.831178	0.896214	0.927953	0.810257	0.954367	0.955013
6	rs115290895	0	30147731	T	A	1950	rs115290895_T	12832.9	12833.8	0.289117	0.376262	0.380572	0.456131	0.411786	0.513645
6	rs116618813	0	30147746	G	C	1951	rs116618813_G	12832.3	12831.1	0.0726465	0.169331	0.0900957	0.27047	0.269825	0.156506
6	rs114108823	0	30147824	A	G	1952	rs114108823_A	12832.9	12834.5	0.529336	0.663621	0.494679	0.74338	0.781788	0.528797
6	rs116401500	0	30147880	A	G	1953	rs116401500_A	12832.3	12833.9	0.506377	0.635917	0.470106	0.715752	0.753491	0.504731
6	rs115800128	0	30147987	C	A	1954	rs115800128_C	12832.9	12834.5	0.513227	0.650731	0.482206	0.728751	0.767526	0.513679
6	rs115819718	0	30148063	A	G	1955	rs115819718_A	12829.5	12826.8	0.0299788	0.0126981	0.0930659	0.0131302	0.0978107	0.123548
6	rs9393989	0	30148063	A	G	1956	rs9393989_A	12829.5	12826.8	0.0299788	0.0126981	0.0930659	0.0131302	0.0978107	0.123548
6	rs115146263	0	30148164	A	G	1957	rs115146263_A	12832.9	12834.4	0.50474	0.634495	0.46892	0.713751	0.75128	0.502861
6	rs115550514	0	30148270	A	G	1958	rs115550514_A	12829.5	12826.7	0.0280428	0.0115546	0.0874783	0.0120976	0.0912836	0.117424
6	rs116533454	0	30148376	A	G	1959	rs116533454_A	12832.9	12833.9	0.309708	0.55121	0.730426	0.555041	0.718311	0.448407
6	rs115441264	0	30148582	A	G	1960	rs115441264_A	12832.9	12830	0.0270548	0.011257	0.085239	0.0117291	0.0896331	0.114409
6	rs116518960	0	30148789	C	A	1961	rs116518960_C	12832.3	12833.9	0.548269	0.680234	0.508676	0.756709	0.795978	0.538633
6	rs115437588	0	30148988	G	A	1962	rs115437588_G	12832.9	12834.4	0.50474	0.634495	0.46892	0.713751	0.75128	0.502861
6	rs2074479	0	30148988	G	A	1963	rs2074479_G	12832.9	12834.4	0.50474	0.634495	0.46892	0.713751	0.75128	0.502861
6	rs115631878	0	30149015	A	G	1964	rs115631878_A	12832.9	12831.6	0.068343	0.135993	0.0986347	0.0996402	0.385886	0.486497
6	rs114578400	0	30149488	A	G	1965	rs114578400_A	12832.3	12831.1	0.0726465	0.169331	0.0900957	0.270462	0.269819	0.156513
6	rs115454480	0	30149538	G	A	1966	rs115454480_G	12830.1	12829.7	0.115985	0.0544278	0.164106	0.0253752	0.211548	0.466315
6	rs9261301	0	30149538	G	A	1967	rs9261301_G	12829	12828.5	0.113926	0.0535584	0.162077	0.024897	0.209089	0.462988
6	rs116010480	0	30150188	A	C	1968	rs116010480_A	12829.5	12814.7	3.9913e-05	0.000570522	0.006218	0.000155311	0.0278728	0.0265519
6	rs116208718	0	30150328	A	G	1969	rs116208718_A	12832.9	12834.5	0.520713	0.656398	0.48859	0.73612	0.772867	0.520357
6	rs114899566	0	30150495	G	A	1970	rs114899566_G	12832.9	12830.4	0.0345915	0.0495024	0.025921	0.105291	0.584149	0.519414
6	rs115673004	0	30150647	G	A	1971	rs115673004_G	12787.4	12789	0.523075	0.628715	0.604857	0.703017	0.634856	0.781315
6	rs114057639	0	30150840	C	G	1972	rs114057639_C	12832.9	12831.8	0.0775928	0.176519	0.0984435	0.283506	0.286359	0.168263
6	rs2285805	0	30150840	C	G	1973	rs2285805_C	12832.9	12831.8	0.0775928	0.176519	0.0984435	0.283506	0.286359	0.168263
6	rs115163487	0	30150934	A	G	1974	rs115163487_A	12830.1	12827.2	0.0268089	0.065391	0.11549	0.0203886	0.175067	0.248098
6	rs114131484	0	30151465	G	A	1975	rs114131484_G	12832.9	12831.2	0.0560141	0.139438	0.0734926	0.199681	0.13641	0.0733555
6	rs115797047	0	30151758	C	G	1976	rs115797047_C	12832.3	12826.5	0.00510638	0.019025	0.00574295	0.0545409	0.210943	0.114667
6	rs116299029	0	30151934	A	G	1977	rs116299029_A	12831.7	12826.6	0.00750491	0.0247649	0.00780424	0.0686562	0.240862	0.139806
6	rs3807033	0	30151934	A	G	1978	rs3807033_A	12832.9	12827.7	0.00740329	0.0244698	0.00770083	0.0680217	0.238796	0.138553
6	rs115512255	0	30151971	G	A	1979	rs115512255_G	12832.9	12832.4	0.116518	0.187586	0.0964335	0.289036	0.630446	0.390296
6	rs115296416	0	30152228	A	C	1980	rs115296416_A	12832.9	12828	0.00870627	0.028921	0.00932175	0.0778257	0.260423	0.149613
6	rs114188496	0	30152367	C	G	1981	rs114188496_C	12832.9	12834.3	0.427243	0.195888	0.551149	0.0612503	0.157934	0.295322
6	rs114798492	0	30152806	A	G	1982	rs114798492_A	12832.9	12832.4	0.118377	0.191412	0.0972394	0.292816	0.630512	0.400579
6	rs3807035	0	30152806	A	G	1983	rs3807035_A	12832.9	12832.4	0.118377	0.191412	0.0972394	0.292816	0.630512	0.400579
6	rs116522833	0	30152893	A	G	1984	rs116522833_A	12832.3	12833.3	0.314615	0.399236	0.405232	0.481159	0.436906	0.542166
6	rs3807036	0	30152893	A	G	1985	rs3807036_A	12832.3	12833.3	0.314615	0.399236	0.405232	0.48101	0.436925	0.542224
6	rs116203264	0	30152965	A	G	1986	rs116203264_A	12832.9	12830.4	0.0335635	0.0102692	0.0690029	0.0115284	0.0562528	0.0968326
6	rs115631432	0	30153178	A	G	1987	rs115631432_A	12832.9	12832.8	0.145471	0.208392	0.344949	0.0928498	0.248982	0.29524
6	rs1150735	0	30153178	A	G	1988	rs1150735_A	12832.3	12832.2	0.143771	0.206588	0.342504	0.0915655	0.246184	0.292075
6	rs115049602	0	30153376	G	A	1989	rs115049602_G	12832.9	12831.3	0.0596372	0.046019	0.298379	0.229088	0.352404	0.225486
6	rs114005297	0	30153470	G	A	1990	rs114005297_G	12832.9	12833.4	0.225585	0.266128	0.341647	0.195418	0.168351	0.15283
6	rs114076521	0	30153474	G	A	1991	rs114076521_G	12832.9	12833.6	0.250654	0.296087	0.377766	0.219016	0.189872	0.172915
6	rs114616477	0	30153689	G	A	1992	rs114616477_G	12832.9	12830.1	0.0288404	0.000536777	0.0035261	0.000381065	0.00494093	0.00486782
6	rs116208055	0	30153710	G	A	1993	rs116208055_G	12832.3	12830.3	0.0462171	0.0869124	0.0508372	0.11848	0.280903	0.152287
6	rs115199282	0	30153825	A	G	1994	rs115199282_A	12831.7	12829.9	0.0490119	0.0911875	0.0534803	0.123793	0.29085	0.158236
6	rs115416863	0	30153861	A	C	1995	rs115416863_A	12832.9	12833.6	0.250654	0.296087	0.377766	0.219016	0.189872	0.172915
6	rs114091685	0	30153937	G	A	1996	rs114091685_G	12832.9	12830.8	0.0436989	0.0819507	0.0475489	0.111392	0.267114	0.14314
6	rs115308766	0	30153990	A	G	1997	rs115308766_A	12832.9	12828	0.00876628	0.0288796	0.00922881	0.0773356	0.260431	0.150512
6	rs114249597	0	30154225	A	G	1998	rs114249597_A	12832.9	12831	0.0482531	0.0896359	0.0525263	0.122265	0.288385	0.156624
6	rs2394734	0	30154225	A	G	1999	rs2394734_A	12832.9	12830.9	0.0470052	0.087982	0.0514951	0.119754	0.283408	0.153348
[truncated: 5,854 more rows]
