# Supplementary material for: Amino acid residues in five separate HLA genes can explain most of the known associations between the MHC and primary biliary cholangitis
Source: PLoS Genet. 2018 Dec 3;14(12):e1007833. doi: 10.1371/journal.pgen.1007833 (PMC6292650; doi:10.1371/journal.pgen.1007833)
Supplement: S4 Spreadsheet — (XLSX) [file pgen.1007833.s032.xlsx]

## Sheet: SupFig1spreadsheet
AAno	AAname	None	PCs	PCsAndGender
1	A.200	0.0810823	0.054819	0.126431
2	A.20A	0.0701847	0.0452836	0.123623
3	A.20P	0.324658	0.299296	0.115313
4	A.150	1.29035	1.26364	1.31903
5	A.15L	1.34041	1.29981	1.4129
6	A.15V	0.0121341	0.00555479	0.0821166
7	A.110	1.29035	1.26364	1.31903
8	A.11S	1.29555	1.26783	1.32686
9	A.11L	0.238008	0.198023	0.322059
10	A.20	1.29035	1.26364	1.31903
11	A.2W	1.29555	1.26783	1.32686
12	A.2R	0.238008	0.198023	0.322059
13	A9F	2.07168	2.08253	1.23361
14	A9S	0.883572	0.960049	0.472917
15	A9Y	1.17602	1.07113	0.810023
16	A9T	0.151574	0.177633	0.102108
17	A12V	0.381822	0.355224	0.173563
18	A12M	0.381822	0.355224	0.173563
19	A17R	0.16508	0.205832	0.117332
20	A17S	0.153832	0.193589	0.106056
21	A17C	0.917273	0.962915	0.986234
22	A19P	0.0695928	0.0681071	0.204232
23	A19K	0.0695928	0.0681071	0.204232
24	A31T	0.324658	0.299296	0.115313
25	A31S	0.324658	0.299296	0.115313
26	A35R	0.324658	0.299296	0.115313
27	A35Q	0.324658	0.299296	0.115313
28	A43Q	0.0107868	0.016396	0.068
29	A43R	0.0107868	0.016396	0.068
30	A44K	5.44461	5.46993	4.20182
31	A44R	5.44461	5.46993	4.20182
32	A45Q	1.61636	1.71856	2.04959
33	A45R	1.61636	1.71856	2.04959
34	A56G	1.75806	1.86584	1.68571
35	A56R	1.7668	1.87408	1.68786
36	A56E	0.324658	0.299296	0.115313
37	A62Q	1.92278	1.92376	1.23701
38	A62G	1.6335	1.64572	1.70628
39	A62E	0.839038	0.884585	0.443463
40	A62R	0.0331586	0.0100027	0.187911
41	A62L	0.712341	0.659181	0.794666
42	A63E	0.306623	0.341697	0.651232
43	A63N	0.0331586	0.0100027	0.187911
44	A63Q	0.712341	0.659181	0.794666
45	A65R	0.843371	0.88863	0.444253
46	A65G	0.843371	0.88863	0.444253
47	A66N	2.59523	2.65526	2.22124
48	A66K	2.59523	2.65526	2.22124
49	A67M	5.44461	5.46993	4.20182
50	A67V	5.44461	5.46993	4.20182
51	A68K	0.282157	0.283706	0.231747
52	A68R	0.282157	0.283706	0.231747
53	A70H	0.12895	0.141018	0.0930276
54	A70Q	0.12895	0.141018	0.0930276
55	A73T	1.30747	1.31343	1.25785
56	A73I	1.30747	1.31343	1.25785
57	A74D	1.62731	1.63987	1.70329
58	A74H	1.63136	1.64359	1.70435
59	A74N	0.324658	0.299296	0.115313
60	A76A	6.31595	6.33567	5.11054
61	A76V	2.66836	2.61016	2.8889
62	A76E	1.06283	1.12404	0.402308
63	A77N	2.95328	2.85675	2.62891
64	A77D	2.66836	2.61016	2.8889
65	A77S	0.0507899	0.0338159	0.289143
66	A79G	0.705848	0.717733	0.133236
67	A79R	0.704585	0.717072	0.133814
68	A79A	0.0465222	0.0350426	0.0119759
69	A80T	0.704585	0.717072	0.133814
70	A80I	0.704585	0.717072	0.133814
71	A81L	0.704585	0.717072	0.133814
72	A81A	0.704585	0.717072	0.133814
73	A82R	0.704585	0.717072	0.133814
74	A82L	0.704585	0.717072	0.133814
75	A83G	0.704585	0.717072	0.133814
76	A83R	0.704585	0.717072	0.133814
77	A90D	3.14667	3.26891	2.58917
78	A90A	3.14667	3.26891	2.58917
79	A95I	2.6039	2.65428	2.20926
80	A95V	1.6688	1.67653	1.76525
81	A95L	0.784117	0.82281	0.383012
82	A97I	3.85948	3.88374	2.62539
83	A97R	1.21466	1.16742	1.01602
84	A970	0.360808	0.370323	0.137056
85	A97M	1.63405	1.71437	0.96057
86	A99Y	0.847606	0.8938	0.443664
87	A99F	0.847606	0.8938	0.443664
88	A102D	2.09419	2.05446	1.519
89	A102H	2.09419	2.05446	1.519
90	A105P	2.2742	2.38608	2.10431
91	A105S	2.2742	2.38608	2.10431
92	A107G	1.64045	1.64394	1.69744
93	A107W	1.64045	1.64394	1.69744
94	A109F	0.273259	0.273561	0.0756091
95	A109L	0.273259	0.273561	0.0756091
96	A114R	3.74454	3.7659	2.5951
97	A114H	2.79183	2.83369	2.29994
98	A114Q	0.36733	0.330743	0.0863641
99	A114E	0.16578	0.206112	0.118364
100	A116D	2.94259	3.02306	2.39867
101	A116Y	2.79183	2.83369	2.29994
102	A116H	0.16578	0.206112	0.118364
103	A127N	3.76158	3.80714	3.15704
104	A127K	3.76158	3.80714	3.15704
105	A142I	2.57269	2.56408	2.51845
106	A142T	2.57269	2.56408	2.51845
107	A144K	0.246635	0.264768	0.0514318
108	A144Q	0.246635	0.264768	0.0514318
109	A145R	2.57269	2.56408	2.51845
110	A145H	2.57269	2.56408	2.51845
111	A149A	0.684722	0.765277	1.06258
112	A149T	0.684722	0.765277	1.06258
113	A150V	5.44461	5.46993	4.20182
114	A150A	5.44461	5.46993	4.20182
115	A151H	0.736045	0.804258	0.569346
116	A151R	0.736045	0.804258	0.569346
117	A152A	2.53302	2.5797	1.75818
118	A152V	4.6153	4.74207	3.58252
119	A152E	1.58225	1.66167	1.46872
120	A152W	0.5378	0.575153	0.790738
121	A152R	0.941137	1.0706	1.12054
122	A156R	5.44461	5.46993	4.20182
123	A156L	1.15926	1.2138	1.34038
124	A156W	0.251966	0.211516	0.0236248
125	A156Q	1.40313	1.40112	0.874588
126	A158V	5.44461	5.46993	4.20182
127	A158A	5.44461	5.46993	4.20182
128	A161E	1.08162	1.09555	0.745885
129	A161D	1.08162	1.09555	0.745885
130	A163R	3.00285	3.12409	2.46765
131	A163T	3.01192	3.13283	2.47149
132	A163E	0.809579	0.767087	0.528507
133	A166D	2.69099	2.65104	2.40681
134	A166E	2.69099	2.65104	2.40681
135	A167G	2.69099	2.65104	2.40681
136	A167W	2.69099	2.65104	2.40681
137	A171Y	0.958741	0.98376	1.27143
138	A171H	0.958741	0.98376	1.27143
139	A177E	0.173597	0.191767	0.368355
140	A177K	0.173597	0.191767	0.368355
141	A1840	2.7962	2.78651	2.90641
142	A184P	1.39098	1.36104	1.44564
143	A184A	1.55465	1.5643	1.6221
144	A1860	2.7962	2.78651	2.90641
145	A186K	2.83384	2.82634	2.95352
146	A186R	1.61636	1.71856	2.04959
147	A1930	2.79264	2.78386	2.91298
148	A193P	1.43864	1.41269	1.5218
149	A193A	1.52453	1.53234	1.5845
150	A1940	2.79264	2.78386	2.91298
151	A194I	1.43864	1.41269	1.5218
152	A194V	1.52453	1.53234	1.5845
153	A2070	2.79264	2.78386	2.91298
154	A207G	1.42191	1.3773	1.48304
155	A207S	1.54068	1.5592	1.61162
156	A2450	2.79264	2.78386	2.91298
157	A245A	2.78257	2.77352	2.90114
158	A245V	0.429614	0.454669	0.523484
159	A2460	2.79049	2.78179	2.91206
160	A246A	2.89475	2.86759	3.04196
161	A246S	0.493758	0.473119	0.647929
162	A246G	0.120425	0.187038	0.169485
163	A2530	2.79264	2.78386	2.91298
164	A253E	2.77292	2.75063	2.87789
165	A253Q	0.120425	0.187038	0.169485
166	A253K	0.324658	0.299296	0.115313
167	A2550	2.79264	2.78386	2.91298
168	A255Q	2.7978	2.78858	2.91433
169	A255K	0.324658	0.299296	0.115313
170	A2680	2.79264	2.78386	2.91298
171	A268K	2.7978	2.78858	2.91433
172	A268E	0.324658	0.299296	0.115313
173	A2760	1.22148	1.19019	1.24103
174	A276L	1.37389	1.3492	1.46309
175	A276P	0.254776	0.279827	0.426691
176	A2820	1.17272	1.13926	1.18092
177	A282I	1.11075	1.07918	1.12818
178	A282V	1.14287	1.10947	0.855284
179	A2940	1.17272	1.13926	1.18092
180	A294L	1.43704	1.41116	1.52233
181	A294F	0.591192	0.634013	0.837001
182	A2980	1.17272	1.13926	1.18092
183	A298I	1.17769	1.14325	1.18834
184	A298F	0.238008	0.198023	0.322059
185	A2990	1.17272	1.13926	1.18092
186	A299T	1.32786	1.27975	1.35276
187	A299A	0.350756	0.31538	0.397664
188	A3070	1.17272	1.13926	1.18092
189	A307M	1.17769	1.14325	1.18834
190	A307R	0.238008	0.198023	0.322059
191	A3100	1.17272	1.13926	1.18092
192	A310R	1.17867	1.14462	1.18237
193	A310K	0.324658	0.299296	0.115313
194	A3110	1.17272	1.13926	1.18092
195	A311K	1.11075	1.07918	1.12818
196	A311N	1.14287	1.10947	0.855284
197	A3140	1.17272	1.13926	1.18092
198	A314D	1.17867	1.14462	1.18237
199	A314V	0.324658	0.299296	0.115313
200	A3210	1.17528	1.14174	1.18133
201	A321T	1.37727	1.35252	1.46433
202	A321S	0.394535	0.432395	0.6279
203	A3340	1.17528	1.14174	1.18133
204	A334V	1.37704	1.33156	1.41712
205	A334M	0.330697	0.297654	0.392729
206	A334S	1.61636	1.71856	2.04959
207	B.230	0.489059	0.552022	0.778733
208	B.23L	0.162882	0.14711	0.243025
209	B.23R	0.534616	0.596803	0.723025
210	B.210	0.489059	0.552022	0.778733
211	B.21M	0.162882	0.14711	0.243025
212	B.21T	0.534616	0.596803	0.723025
213	B.160	0.489059	0.552022	0.778733
214	B.16V	0.276609	0.320559	0.639996
215	B.16L	0.629414	0.667313	0.353376
216	B.110	0.489059	0.552022	0.778733
217	B.11S	0.249188	0.262621	0.442746
218	B.11W	0.466616	0.556763	0.615181
219	B.100	0.489059	0.552022	0.778733
220	B.10A	0.196541	0.199141	0.352945
221	B.10G	0.531765	0.64029	0.736792
222	B.80	0.489059	0.552022	0.778733
223	B.8L	0.29992	0.313082	0.496445
224	B.8V	0.368949	0.4541	0.518428
225	B4S	0.713256	0.750982	0.894395
226	B4F	0.713256	0.750982	0.894395
227	B9Y	2.21734	2.21965	2.90886
228	B9D	0.787319	0.820965	0.404356
229	B9H	4.97019	5.03287	5.17472
230	B11S	3.28854	3.19444	3.88563
231	B11A	3.28854	3.19444	3.88563
232	B12V	3.69704	3.61468	4.55117
233	B12M	3.69704	3.61468	4.55117
234	B24S	4.75644	4.67816	5.16084
235	B24T	1.911	1.97665	3.05592
236	B24A	1.47391	1.35709	0.832599
237	B30D	1.46171	1.44791	1.06213
238	B30G	1.46171	1.44791	1.06213
239	B32Q	1.83325	1.89804	3.13152
240	B32L	1.83325	1.89804	3.13152
241	B41A	1.92346	2.03978	2.8757
242	B41T	1.92346	2.03978	2.8757
243	B45E	8.78978	8.82804	8.34268
244	B45M	1.24556	1.30422	1.50562
245	B45T	9.62824	9.4965	7.07372
246	B45K	1.87179	1.98771	2.97663
247	B45G	0.995902	0.987607	0.947938
248	B46E	1.24556	1.30422	1.50562
249	B46A	1.24556	1.30422	1.50562
250	B52I	0.995902	0.987607	0.947938
251	B52V	0.995902	0.987607	0.947938
252	B58E	0.135213	0.125906	0.188912
253	B58A	0.135213	0.125906	0.188912
254	B59Y	0.627034	0.607313	0.227041
255	B59H	0.627034	0.607313	0.227041
256	B62R	2.37776	2.47323	2.32188
257	B62G	2.37776	2.47323	2.32188
258	B63N	0.788061	0.777811	1.2247
259	B63E	0.788061	0.777811	1.2247
260	B65Q	2.47259	2.59667	2.47926
261	B65R	2.47259	2.59667	2.47926
262	B66I	2.46499	2.58893	2.47636
263	B66N	2.47259	2.59667	2.47926
264	B66K	0.775101	0.771004	0.210029
265	B67Y	11.2725	11.1165	11.7732
266	B67C	0.0456088	0.0353477	0.0105414
267	B67F	2.82469	2.74733	2.83232
268	B67S	3.12498	3.21572	3.43954
269	B67M	2.47259	2.59667	2.47926
270	B69A	12.1869	12.3007	12.0704
271	B69T	12.1796	12.2935	12.0683
272	B69R	0.775101	0.771004	0.210029
273	B70Q	11.296	11.1403	11.7951
274	B70N	12.1796	12.2935	12.0683
275	B70S	2.47259	2.59667	2.47926
276	B70K	0.0651291	0.0320527	0.220912
277	B71A	12.1796	12.2935	12.0683
278	B71T	12.1796	12.2935	12.0683
279	B74D	6.85399	6.89698	6.42755
280	B74Y	6.85399	6.89698	6.42755
281	B76E	0.182559	0.177693	0.024525
282	B76V	0.182559	0.177693	0.024525
283	B77S	0.0293934	0.00992292	0.142233
284	B77N	0.15711	0.16354	0.0757676
285	B77D	0.444403	0.392181	0.595322
286	B77G	0.141193	0.13695	0.0366068
287	B80N	0.0261993	0.00692748	0.143527
288	B80T	0.22947	0.227192	0.578227
289	B80I	0.278651	0.321341	0.489563
290	B81L	0.15711	0.16354	0.0757676
291	B81A	0.15711	0.16354	0.0757676
292	B82R	0.0261993	0.00692748	0.143527
293	B82L	0.0261993	0.00692748	0.143527
294	B83G	0.0261993	0.00692748	0.143527
295	B83R	0.0261993	0.00692748	0.143527
296	B90A	0.141193	0.13695	0.0366068
297	B90D	0.141193	0.13695	0.0366068
298	B94T	0.740334	0.734831	1.00293
299	B94I	0.767194	0.762772	1.04198
300	B94W	0.713256	0.750982	0.894395
301	B95L	4.76814	4.77613	4.63716
302	B95W	4.2811	4.28658	3.58236
303	B95I	1.06099	1.06334	1.26311
304	B97S	9.60853	9.56623	8.57301
305	B97T	3.61016	3.58812	2.6893
306	B97W	0.300343	0.33738	0.449678
307	B97R	5.88477	6.00579	5.48222
308	B97N	0.0540483	0.0216926	0.220577
309	B97V	2.39999	2.42444	1.97718
310	B98M	0.0780657	0.0598658	0.339045
311	B98T	0.0780657	0.0598658	0.339045
312	B99Y	0.564991	0.561304	0.459651
313	B99S	0.757642	0.781821	0.462024
314	B99F	0.143952	0.180518	0.0657526
315	B103V	2.85993	2.80089	2.11458
316	B103L	2.84532	2.78668	2.12198
317	B103M	0.141193	0.13695	0.0366068
318	B109L	0.662428	0.717403	0.754516
319	B109F	0.662428	0.717403	0.754516
320	B113H	0.259354	0.247202	0.605694
321	B113Y	0.259354	0.247202	0.605694
322	B114D	1.2044	1.17617	1.39779
323	B114N	1.21902	1.24057	1.20273
324	B114H	0.00121799	0.0411492	0.197918
325	B116Y	3.07653	3.02331	2.53489
326	B116S	2.07409	1.97933	1.17676
327	B116L	0.0278791	0.0265757	0.068219
328	B116F	1.85474	1.9134	1.1519
329	B116D	0.0202286	0.0233022	0.339576
330	B116H	1.3392	1.43424	1.172
331	B116N	0.252459	0.220791	0.221206
332	B118Y	2.22279	2.28883	1.56161
333	B118C	2.22279	2.28883	1.56161
334	B131R	3.61271	3.49483	2.93919
335	B131S	3.61271	3.49483	2.93919
336	B143T	5.1444	5.34673	5.10955
337	B143S	5.1444	5.34673	5.10955
338	B145R	0.106911	0.107807	0.00939077
339	B145L	0.106911	0.107807	0.00939077
340	B147W	5.1444	5.34673	5.10955
341	B147L	5.1444	5.34673	5.10955
342	B152E	7.13396	7.23583	8.87718
343	B152V	7.13396	7.23583	8.87718
344	B156R	9.77658	9.57878	10.2411
345	B156D	0.125171	0.144575	0.184746
346	B156L	6.00697	6.05379	5.12756
347	B156W	0.168197	0.192479	0.372189
348	B158A	1.03288	1.16612	0.710242
349	B158T	1.03288	1.16612	0.710242
350	B163E	2.27931	2.17934	2.11693
351	B163T	0.139483	0.157455	0.158942
352	B163L	2.31765	2.27631	2.2287
353	B167W	0.0152471	0.034993	0.303033
354	B167S	0.0152471	0.034993	0.303033
355	B171Y	2.59922	2.49945	1.71518
356	B171H	2.59922	2.49945	1.71518
357	B177D	2.99243	2.89696	2.46258
358	B177E	2.99243	2.89696	2.46258
359	B178K	2.24882	2.08153	2.36877
360	B178T	2.24882	2.08153	2.36877
361	B180E	8.35552	8.35189	7.46447
362	B180Q	8.35552	8.35189	7.46447
363	B181R	5.08565	5.30185	5.15465
364	B181H	0.422261	0.378728	0.138348
365	B181E	5.08339	5.29973	5.1537
366	B1940	0.275133	0.317535	0.561384
367	B194I	0.288075	0.305781	0.44058
368	B194V	0.00663774	0.0604141	0.311595
369	B1990	0.275133	0.317535	0.561384
370	B199A	0.217407	0.26036	0.479082
371	B199V	1.9805	1.82663	2.0973
372	B2450	0.275133	0.317535	0.561384
373	B245A	0.298756	0.33787	0.555645
374	B245T	0.267217	0.207962	0.049075
375	B2750	0.513182	0.579679	0.765926
376	B275E	0.531366	0.5985	0.763279
377	B275K	0.141193	0.13695	0.0366068
378	B2820	0.497729	0.563506	0.747588
379	B282V	0.215837	0.258584	0.0434681
380	B282I	0.407988	0.449782	0.80201
381	B3050	0.497729	0.563506	0.747588
382	B305A	0.11657	0.138178	0.0301094
383	B305T	0.559545	0.620153	1.10278
384	B3070	0.497729	0.563506	0.747588
385	B307M	0.577348	0.646097	1.11439
386	B307T	0.00992463	0.00842592	0.000422729
387	B307V	0.14736	0.183826	0.0634545
388	B3250	0.538165	0.599012	0.744309
389	B325C	0.201851	0.235773	0.0199368
390	B325S	0.45822	0.499993	0.857823
391	C.180	5.72845	5.61278	6.08041
392	C.18R	5.73644	5.61779	6.10522
393	C.18Q	0.0596564	0.0377592	0.171243
394	C.170	5.73285	5.61763	6.08857
395	C.17T	0.519701	0.526901	0.456219
396	C.17A	5.60028	5.48604	5.9658
397	C.150	5.68274	5.56993	6.05685
398	C.15L	5.66104	5.5455	5.99961
399	C.15I	0.090264	0.10499	0.201576
400	C.90	5.72845	5.61278	6.08041
401	C.9A	0.519701	0.526901	0.456219
402	C.9G	5.60391	5.48629	5.98235
403	C.9I	0.0596564	0.0377592	0.171243
404	C00	5.81477	5.73097	6.25126
405	C0C	5.73644	5.61779	6.10522
406	C0G	0.191202	0.271385	0.332423
407	C6K	2.32604	2.31144	1.76741
408	C6R	2.32604	2.31144	1.76741
409	C9F	2.32604	2.31144	1.76741
410	C9Y	0.0801602	0.0753605	0.234343
411	C9S	10.4449	10.3995	9.07777
412	C9D	7.18055	7.12758	6.93796
413	C11S	12.741	12.6685	10.6656
414	C11A	12.741	12.6685	10.6656
415	C14R	9.15197	9.09977	7.94109
416	C14W	9.15197	9.09977	7.94109
417	C16G	2.59547	2.70249	1.98935
418	C16S	2.59547	2.70249	1.98935
419	C21R	0.161647	0.143307	0.209777
420	C21H	0.161647	0.143307	0.209777
421	C24S	5.44814	5.42757	5.79269
422	C24A	5.44814	5.42757	5.79269
423	C35R	0.99412	0.957305	1.33274
424	C35Q	0.99412	0.957305	1.33274
425	C49A	6.05531	6.0356	5.61253
426	C49E	9.15197	9.09977	7.94109
427	C49S	0.13349	0.137895	0.212085
428	C66K	0.237689	0.257999	0.152117
429	C66N	0.237689	0.257999	0.152117
430	C73T	1.32892	1.31622	1.71118
431	C73A	1.32892	1.31622	1.71118
432	C77S	7.42941	7.2832	8.26795
433	C77N	7.42941	7.2832	8.26795
434	C80N	7.42941	7.2832	8.26795
435	C80K	7.42941	7.2832	8.26795
436	C90A	1.05368	1.04036	1.19793
437	C90D	1.05368	1.04036	1.19793
438	C91G	2.34653	2.41589	1.99584
439	C91R	2.34653	2.41589	1.99584
440	C94T	1.29419	1.28893	1.16334
441	C94I	1.29419	1.28893	1.16334
442	C95L	0.621129	0.62331	0.478892
443	C95I	1.39753	1.39209	1.38193
444	C95F	1.86026	1.83511	2.57199
445	C97W	0.101202	0.141015	0.0351163
446	C97R	0.100028	0.139914	0.0349972
447	C97S	0.195179	0.170407	0.0216185
448	C99C	2.32604	2.31144	1.76741
449	C99Y	1.31302	1.34819	0.763855
450	C99F	10.4455	10.3997	9.07242
451	C99S	5.60391	5.48629	5.98235
452	C103L	0.150228	0.148306	0.174079
453	C103V	0.150228	0.148306	0.174079
454	C113Y	4.4517	4.46032	3.61356
455	C113H	4.4517	4.46032	3.61356
456	C114D	7.57144	7.40296	7.73429
457	C114V	0.465686	0.436509	0.133697
458	C114N	7.57698	7.4081	7.7358
459	C116Y	1.16073	1.1654	1.0388
460	C116S	10.9945	10.8601	10.0753
461	C116F	6.28023	6.16051	5.88172
462	C116L	3.32162	3.29519	2.95142
463	C134T	0.658948	0.640751	0.117887
464	C134I	0.658948	0.640751	0.117887
465	C138T	0.965744	0.933319	1.33071
466	C138K	0.965744	0.933319	1.33071
467	C143T	0.104352	0.0716527	0.279592
468	C143S	0.104352	0.0716527	0.279592
469	C147W	8.15778	8.1506	7.99584
470	C147L	8.15778	8.1506	7.99584
471	C152E	10.7703	10.5808	10.2269
472	C152A	10.8417	10.644	10.2344
473	C152T	0.380355	0.314543	0.0324408
474	C156R	11.1452	10.9832	10.5788
475	C156W	1.07625	1.09302	1.03915
476	C156L	3.21229	3.21363	3.05747
477	C156D	1.86026	1.83511	2.57199
478	C156Q	1.87767	1.72935	1.35552
479	C163T	0.544943	0.58445	0.329915
480	C163E	2.21875	2.35582	1.54496
481	C163L	0.150228	0.148306	0.174079
482	C170R	0.0596564	0.0377592	0.171243
483	C170G	0.0596564	0.0377592	0.171243
484	C173E	0.150228	0.148306	0.174079
485	C173K	0.150228	0.148306	0.174079
486	C175G	0.458684	0.333066	0.0947913
487	C175R	0.458684	0.333066	0.0947913
488	C177E	0.351018	0.332648	0.435219
489	C177K	0.351018	0.332648	0.435219
490	C184H	2.03187	1.97652	1.41216
491	C1840	3.63093	3.56867	4.64786
492	C184P	7.11465	6.97188	8.00127
493	C184R	0.0596564	0.0377592	0.171243
494	C194V	2.14986	2.08632	1.49994
495	C1940	3.63093	3.56867	4.64786
496	C194L	7.20596	7.05932	8.07499
497	C219W	2.11796	2.06774	1.50131
498	C2190	3.63093	3.56867	4.64786
499	C219R	7.15659	7.02071	8.0564
500	C248M	2.32604	2.31144	1.76741
501	C2480	3.63093	3.56867	4.64786
502	C248V	7.25306	7.14802	8.2642
503	C253E	2.03187	1.97652	1.41216
504	C2530	3.63093	3.56867	4.64786
505	C253Q	7.10575	6.96624	7.97379
506	C261V	2.0406	1.98178	1.43246
507	C2610	3.63093	3.56867	4.64786
508	C261M	7.11465	6.97188	8.00127
509	C267P	2.03187	1.97652	1.41216
510	C2670	3.63093	3.56867	4.64786
511	C267Q	7.10575	6.96624	7.97379
512	C273R	2.0406	1.98178	1.43246
513	C2730	3.63093	3.56867	4.64786
514	C273S	7.11465	6.97188	8.00127
515	C2750	7.25843	7.15358	8.26908
516	C275E	7.3928	7.27498	8.3581
517	C275K	0.373799	0.337643	0.525906
518	C275G	0.380355	0.314543	0.0324408
519	C2850	7.25306	7.14802	8.2642
520	C285V	0.27169	0.343757	0.510832
521	C285M	7.11465	6.97188	8.00127
522	C285L	0.0596564	0.0377592	0.171243
523	C2950	7.25306	7.14802	8.2642
524	C295A	0.241547	0.315461	0.432878
525	C295V	7.1195	6.97721	8.01047
526	C3030	7.25306	7.14802	8.2642
527	C303A	7.29567	7.19061	8.31167
528	C303M	2.81426	2.83112	3.07629
529	C3040	7.25306	7.14802	8.2642
530	C304V	7.40331	7.28679	8.31992
531	C304M	0.713832	0.62645	0.16171
532	C3050	7.25306	7.14802	8.2642
533	C305A	0.248964	0.324331	0.448783
534	C305T	7.11465	6.97188	8.00127
535	C3060	7.25306	7.14802	8.2642
536	C306V	0.263927	0.334537	0.493804
537	C306A	7.11059	6.97157	7.98296
538	C3070	7.25306	7.14802	8.2642
539	C307V	0.248964	0.324331	0.448783
540	C307M	7.11465	6.97188	8.00127
541	C3260	7.25306	7.14802	8.2642
542	C326S	0.248964	0.324331	0.448783
543	C326C	7.11465	6.97188	8.00127
544	C3390	7.25306	7.14802	8.2642
545	C339A	0.248964	0.324331	0.448783
546	C339T	7.11465	6.97188	8.00127
547	C3420	7.25306	7.14802	8.2642
548	C342A	7.29567	7.19061	8.31167
549	C342P	2.81426	2.83112	3.07629
550	DRB.250	10.9619	11.0587	9.78611
551	DRB.25K	0.713832	0.70909	0.532792
552	DRB.25R	17.8476	18.0227	15.5811
553	DRB.240	10.9619	11.0587	9.78611
554	DRB.24L	10.9048	11.0021	9.7388
555	DRB.24F	0.795662	0.776829	0.658516
556	DRB.170	10.9619	11.0587	9.78611
557	DRB.17T	10.9048	11.0021	9.7388
558	DRB.17A	0.795662	0.776829	0.658516
559	DRB.160	10.9619	11.0587	9.78611
560	DRB.16A	0.68004	0.67509	0.502393
561	DRB.16V	17.7896	17.9634	15.5215
562	DRB.10	10.9619	11.0587	9.78611
563	DRB.1A	10.9311	11.0268	9.76221
564	DRB.1S	0.464554	0.480394	0.35551
565	DRB9W	0.771515	0.758401	0.730817
566	DRB9E	1.16412	1.1466	1.17458
567	DRB9K	1.65523	1.6399	1.98235
568	DRB10Q	0.96189	1.00902	0.872935
569	DRB10Y	0.891775	0.93489	0.731276
570	DRB10E	0.458516	0.470951	0.871571
571	DRB10T	1.60242	1.62478	1.46441
572	DRB11L	4.59434	4.45435	4.14757
573	DRB11S	0.847228	0.888887	0.692185
574	DRB11V	4.20697	4.26291	3.80605
575	DRB11G	1.02329	1.0761	1.43685
576	DRB11D	1.65523	1.6399	1.98235
577	DRB11P	14.2907	14.1829	14.7302
578	DRB12K	0.847228	0.888887	0.692185
579	DRB12T	0.847228	0.888887	0.692185
580	DRB13F	2.86373	2.75724	2.23935
581	DRB13S	10.1279	10.3145	8.85538
582	DRB13H	4.59754	4.66462	4.38291
583	DRB13Y	1.02329	1.0761	1.43685
584	DRB13G	25.5718	25.5927	22.5669
585	DRB13R	14.2907	14.1829	14.7302
586	DRB14E	1.02329	1.0761	1.43685
587	DRB14K	1.02329	1.0761	1.43685
588	DRB16H	25.5718	25.5927	22.5669
589	DRB16Y	25.5718	25.5927	22.5669
590	DRB25R	1.02329	1.0761	1.43685
591	DRB25Q	1.02329	1.0761	1.43685
592	DRB26L	1.99531	1.91436	1.80031
593	DRB26Y	0.594581	0.587115	0.52871
594	DRB26F	0.56954	0.542576	0.536127
595	DRB28E	3.00357	2.99523	3.33131
596	DRB28D	2.26949	2.26581	2.46406
597	DRB28H	1.65523	1.6399	1.98235
598	DRB30C	4.59434	4.45435	4.14757
599	DRB30Y	2.28331	2.27891	2.47764
600	DRB30L	1.02329	1.0761	1.43685
601	DRB30G	1.65523	1.6399	1.98235
602	DRB30R	0.458516	0.470951	0.871571
603	DRB30H	4.21196	4.16877	3.24959
604	DRB31I	3.25204	3.14413	2.76732
605	DRB31F	2.86373	2.75724	2.23935
606	DRB31V	0.458516	0.470951	0.871571
607	DRB32Y	1.85996	1.92447	1.30173
608	DRB32H	1.85996	1.92447	1.30173
609	DRB37N	4.59754	4.66462	4.38291
610	DRB37H	4.59754	4.66462	4.38291
611	DRB58S	2.3624	2.39883	2.74012
612	DRB58N	2.37329	2.42924	1.87935
613	DRB58Y	4.63853	4.68871	3.56393
614	DRB58F	2.02105	2.06845	2.58276
615	DRB58D	4.12061	4.15759	4.23365
616	DRB58L	4.18519	4.14126	3.23031
617	DRB38V	3.99883	3.98032	3.71966
618	DRB38A	0.458516	0.470951	0.871571
619	DRB38L	4.25568	4.21185	3.29175
620	DRB40F	0.458516	0.470951	0.871571
621	DRB40Y	0.458516	0.470951	0.871571
622	DRB47Y	36.3836	36.3266	33.1913
623	DRB47F	36.3836	36.3266	33.1913
624	DRB51T	3.39676	3.54646	3.01159
625	DRB51R	3.39676	3.54646	3.01159
626	DRB57D	9.01077	9.07565	8.78359
627	DRB57S	28.365	28.1146	22.3743
628	DRB57V	0.0528288	0.0284484	0.137354
629	DRB57A	1.87203	1.82919	1.95618
630	DRB58A	23.7697	23.9118	23.1809
631	DRB58E	23.7697	23.9118	23.1809
632	DRB60Y	0.727092	0.762334	1.15017
633	DRB60S	0.134566	0.163187	0.389831
634	DRB60H	1.87203	1.82919	1.95618
635	DRB67L	8.73214	8.68015	8.36123
636	DRB67I	9.63262	9.5945	8.05649
637	DRB67F	0.15222	0.156989	0.139338
638	DRB670	0.640138	0.617913	0.528352
639	DRB70Q	0.0853119	0.0773428	0.125712
640	DRB70D	0.000605102	0.00207306	0.0881006
641	DRB70R	0.231298	0.215926	0.0855738
642	DRB700	0.640138	0.617913	0.528352
643	DRB71R	14.6853	14.5903	13.4999
644	DRB71E	1.48161	1.57169	1.03955
645	DRB71K	0.487887	0.447692	0.41444
646	DRB710	0.640138	0.617913	0.528352
647	DRB71A	15.0652	14.9607	15.1695
648	DRB73A	0.443653	0.477705	0.780665
649	DRB73G	0.444772	0.478828	0.78187
650	DRB730	0.640138	0.617913	0.528352
651	DRB74A	14.591	14.7048	14.6955
652	DRB74R	0.224715	0.220645	0.139037
653	DRB74E	2.28002	2.2311	2.22618
654	DRB74Q	1.02329	1.0761	1.43685
655	DRB74L	45.9439	45.853	38.5707
656	DRB740	0.640138	0.617913	0.528352
657	DRB77T	0.225958	0.221852	0.139995
658	DRB77N	0.224715	0.220645	0.139037
659	DRB770	0.640138	0.617913	0.528352
660	DRB78Y	0.514034	0.554162	0.751902
661	DRB78V	0.515506	0.555638	0.753393
662	DRB780	0.640138	0.617913	0.528352
663	DRB85V	3.53781	3.67655	3.24388
664	DRB85A	3.5283	3.66694	3.23529
665	DRB850	0.640138	0.617913	0.528352
666	DRB86G	7.8485	8.01112	7.11708
667	DRB86V	7.8435	8.00621	7.11279
668	DRB860	0.640138	0.617913	0.528352
669	DRB960	10.9018	10.9978	9.71392
670	DRB96E	0.915658	0.913488	0.700833
671	DRB96Y	0.144625	0.157234	0.391358
672	DRB96H	18.5603	18.7432	16.1999
673	DRB96Q	0.464554	0.480394	0.35551
674	DRB980	10.9018	10.9978	9.71392
675	DRB98K	10.9048	11.0021	9.7388
676	DRB98E	0.144625	0.157234	0.391358
677	DRB1040	10.9018	10.9978	9.71392
678	DRB104S	10.9048	11.0021	9.7388
679	DRB104A	0.144625	0.157234	0.391358
680	DRB1200	10.9018	10.9978	9.71392
681	DRB120S	10.9048	11.0021	9.7388
682	DRB120N	0.144625	0.157234	0.391358
683	DRB1330	10.9018	10.9978	9.71392
684	DRB133R	10.8711	10.9659	9.69012
685	DRB133L	0.464554	0.480394	0.35551
686	DRB1400	10.9018	10.9978	9.71392
687	DRB140T	10.8711	10.9659	9.69012
688	DRB140A	0.464554	0.480394	0.35551
689	DRB1420	10.9018	10.9978	9.71392
690	DRB142V	10.8711	10.9659	9.69012
691	DRB142M	0.464554	0.480394	0.35551
692	DRB1490	10.9018	10.9978	9.71392
693	DRB149H	10.8741	10.9702	9.715
694	DRB149Q	0.0757854	0.0734471	0.0988123
695	DRB1800	10.9018	10.9978	9.71392
696	DRB180V	10.9048	11.0021	9.7388
697	DRB180L	0.144625	0.157234	0.391358
698	DRB1810	10.9018	10.9978	9.71392
699	DRB181T	10.9018	10.9978	9.71392
700	DRB2330	10.9018	10.9978	9.71392
701	DRB233T	0.910236	0.908201	0.707507
702	DRB233R	18.5603	18.7432	16.1999
703	DQA.16L	1.45856	1.36244	1.03558
704	DQA.160	1.07762	1.07549	0.64942
705	DQA.16M	1.45051	1.35471	1.03085
706	DQA.13A	28.2205	28.2707	27.3408
707	DQA.130	1.07762	1.07549	0.64942
708	DQA.13T	28.1462	28.1952	27.2894
709	DQA.7V	1.32462	1.29087	1.14713
710	DQA.7M	1.34587	1.31175	1.16056
711	DQA.70	1.07762	1.07549	0.64942
712	DQA.6M	1.49179	1.46928	1.7387
713	DQA.60	1.07762	1.07549	0.64942
714	DQA.6T	1.45194	1.42992	1.70971
715	DQA1E	1.58209	1.50993	0.739666
716	DQA10	1.07762	1.07549	0.64942
717	DQA1K	1.18592	1.11761	0.563271
718	DQA2D	1.32462	1.29087	1.14713
719	DQA2G	1.34587	1.31175	1.16056
720	DQA20	1.07762	1.07549	0.64942
721	DQA11C	3.29239	3.43542	3.37115
722	DQA110	1.07762	1.07549	0.64942
723	DQA11Y	3.30213	3.44526	3.37732
724	DQA18F	3.30213	3.44526	3.37732
725	DQA18S	3.30213	3.44526	3.37732
726	DQA25Y	0.523308	0.52123	0.962473
727	DQA25F	0.523308	0.52123	0.962473
728	DQA26T	3.56944	3.63636	3.31552
729	DQA26S	3.56944	3.63636	3.31552
730	DQA34E	13.7344	13.7418	13.6647
731	DQA34Q	13.7344	13.7418	13.6647
732	DQA40E	0.447643	0.43742	0.538865
733	DQA40G	0.447643	0.43742	0.538865
734	DQA41R	1.18778	1.28358	0.880012
735	DQA41K	1.18778	1.28358	0.880012
736	DQA44T	1.07762	1.07549	0.64942
737	DQA44A	1.07762	1.07549	0.64942
738	DQA45A	3.30213	3.44526	3.37732
739	DQA45V	3.30213	3.44526	3.37732
740	DQA47R	3.30213	3.44526	3.37732
741	DQA47K	1.04537	1.09692	1.45465
742	DQA47Q	3.56944	3.63636	3.31552
743	DQA47C	0.447643	0.43742	0.538865
744	DQA48W	3.30213	3.44526	3.37732
745	DQA48L	3.30213	3.44526	3.37732
746	DQA50E	3.30213	3.44526	3.37732
747	DQA50L	4.80033	4.94713	5.16681
748	DQA50V	0.447643	0.43742	0.538865
749	DQA51F	0.447643	0.43742	0.538865
750	DQA51L	0.447643	0.43742	0.538865
751	DQA52S	3.30213	3.44526	3.37732
752	DQA52H	1.04537	1.09692	1.45465
753	DQA52R	1.52539	1.57787	1.25915
754	DQA53K	3.30213	3.44526	3.37732
755	DQA53R	4.80033	4.94713	5.16681
756	DQA53G	0.369255	0.359976	0.607848
757	DQA53Q	0.178916	0.176971	0.106877
758	DQA54F	1.04537	1.09692	1.45465
759	DQA54L	1.04537	1.09692	1.45465
760	DQA55G	3.30213	3.44526	3.37732
761	DQA55R	3.30213	3.44526	3.37732
762	DQA56G	3.30213	3.44526	3.37732
763	DQA560	0.169833	0.195995	0.257315
764	DQA56R	3.56944	3.63636	3.31552
765	DQA61G	3.30213	3.44526	3.37732
766	DQA61F	3.30213	3.44526	3.37732
767	DQA64R	3.30213	3.44526	3.37732
768	DQA64T	3.30213	3.44526	3.37732
769	DQA66M	3.30213	3.44526	3.37732
770	DQA66I	3.30213	3.44526	3.37732
771	DQA69A	3.30213	3.44526	3.37732
772	DQA69L	1.03191	0.951386	0.675946
773	DQA69T	43.0098	42.9313	35.3969
774	DQA75I	13.3843	13.3343	12.4003
775	DQA75S	13.3843	13.3343	12.4003
776	DQA76M	3.30213	3.44526	3.37732
777	DQA76L	0.169833	0.195995	0.257315
778	DQA76V	3.56944	3.63636	3.31552
779	DQA80Y	3.30213	3.44526	3.37732
780	DQA80S	3.30213	3.44526	3.37732
781	DQA107T	13.4167	13.3665	12.4218
782	DQA1070	1.07762	1.07549	0.64942
783	DQA107I	13.3843	13.3343	12.4003
784	DQA129Q	2.19836	2.26062	2.4798
785	DQA129H	2.20667	2.26897	2.4853
786	DQA1290	1.07762	1.07549	0.64942
787	DQA130S	1.20355	1.29993	0.889432
788	DQA130A	1.18778	1.28358	0.880012
789	DQA1300	1.07762	1.07549	0.64942
790	DQA138T	5.11197	5.16115	4.02419
791	DQA1380	1.07762	1.07549	0.64942
792	DQA138I	6.96925	7.0284	5.19489
793	DQA156F	13.4167	13.3665	12.4218
794	DQA1560	1.07762	1.07549	0.64942
795	DQA156L	13.3843	13.3343	12.4003
796	DQA160A	0.466685	0.439647	0.2974
797	DQA1600	1.07762	1.07549	0.64942
798	DQA160D	0.468384	0.440708	0.305259
799	DQA160S	0.164885	0.15078	0.279016
800	DQA161D	13.4167	13.3665	12.4218
801	DQA1610	1.07762	1.07549	0.64942
802	DQA161E	13.3843	13.3343	12.4003
803	DQA163I	13.4167	13.3665	12.4218
804	DQA1630	1.07762	1.07549	0.64942
805	DQA163S	13.3843	13.3343	12.4003
806	DQA175Q	3.29239	3.43542	3.37115
807	DQA1750	1.07762	1.07549	0.64942
808	DQA175E	21.8048	22.114	20.9042
809	DQA175K	13.3843	13.3343	12.4003
810	DQA187A	3.5561	3.62297	3.30699
811	DQA1870	1.07762	1.07549	0.64942
812	DQA187T	3.56944	3.63636	3.31552
813	DQA207V	15.197	15.1183	15.1918
814	DQA207M	15.1858	15.1075	15.1902
815	DQA2070	1.07762	1.07549	0.64942
816	DQA215F	4.78769	4.93436	5.15847
817	DQA2150	1.07762	1.07549	0.64942
818	DQA215L	4.80033	4.94713	5.16681
819	DQA218Q	3.29239	3.43542	3.37115
820	DQA2180	1.07762	1.07549	0.64942
821	DQA218R	3.30213	3.44526	3.37732
822	DQB.270	2.22278	2.27399	2.24071
823	DQB.27A	0.00484577	0.0266046	0.0823345
824	DQB.27S	4.37727	4.23912	3.81257
825	DQB.210	2.22278	2.27399	2.24071
826	DQB.21G	0.00484577	0.0266046	0.0823345
827	DQB.21D	4.37727	4.23912	3.81257
828	DQB.180	2.22278	2.27399	2.24071
829	DQB.18A	5.42805	5.26847	4.15789
830	DQB.18V	16.4768	16.2981	13.9059
831	DQB.100	2.22278	2.27399	2.24071
832	DQB.10S	2.42753	2.49859	3.02526
833	DQB.10A	0.44912	0.453478	0.306094
834	DQB.90	2.22278	2.27399	2.24071
835	DQB.9M	0.00484577	0.0266046	0.0823345
836	DQB.9I	4.37727	4.23912	3.81257
837	DQB.60	2.22278	2.27399	2.24071
838	DQB.6T	0.00484577	0.0266046	0.0823345
839	DQB.6S	4.37727	4.23912	3.81257
840	DQB.50	2.22278	2.27399	2.24071
841	DQB.5P	0.00484577	0.0266046	0.0823345
842	DQB.5S	4.37727	4.23912	3.81257
843	DQB.40	2.22278	2.27399	2.24071
844	DQB.4V	0.00484577	0.0266046	0.0823345
845	DQB.4L	4.37727	4.23912	3.81257
846	DQB9Y	0.108826	0.0951923	0.373692
847	DQB9F	0.23209	0.215346	0.551097
848	DQB9L	0.851489	0.848561	0.905169
849	DQB13G	14.0627	13.8972	12.625
850	DQB13A	14.0627	13.8972	12.625
851	DQB14M	4.37727	4.23912	3.81257
852	DQB14L	4.37727	4.23912	3.81257
853	DQB26L	2.70162	2.67162	2.26555
854	DQB26Y	14.0627	13.8972	12.625
855	DQB26G	27.9482	27.5061	23.8233
856	DQB28S	1.04773	1.08679	1.46982
857	DQB28T	1.04773	1.08679	1.46982
858	DQB30S	1.04773	1.08679	1.46982
859	DQB30Y	3.5095	3.40647	4.02151
860	DQB30H	1.89194	1.75696	1.80018
861	DQB37I	1.04773	1.08679	1.46982
862	DQB37Y	1.24563	1.28663	1.70809
863	DQB37D	0.851489	0.848561	0.905169
864	DQB38V	7.28319	7.20378	7.49383
865	DQB38A	7.28319	7.20378	7.49383
866	DQB45G	15.2209	15.0343	13.7287
867	DQB45E	15.2209	15.0343	13.7287
868	DQB46E	1.04773	1.08679	1.46982
869	DQB46V	1.04773	1.08679	1.46982
870	DQB47F	1.04773	1.08679	1.46982
871	DQB47Y	1.04773	1.08679	1.46982
872	DQB52L	1.04773	1.08679	1.46982
873	DQB52P	1.04773	1.08679	1.46982
874	DQB53L	3.31957	3.46192	3.39036
875	DQB53Q	3.31957	3.46192	3.39036
876	DQB55L	1.04773	1.08679	1.46982
877	DQB55P	3.14839	3.06353	3.11141
878	DQB55R	1.0902	1.00812	0.741448
879	DQB56P	43.4637	43.3822	36.1906
880	DQB56L	43.4637	43.3822	36.1906
881	DQB57A	7.43311	7.52243	7.58387
882	DQB57D	13.5415	13.431	13.0716
883	DQB57V	2.48256	2.36885	2.26268
884	DQB57S	0.179078	0.175014	0.0244473
885	DQB60Y	0.16875	0.166098	0.435072
886	DQB60N	0.16875	0.166098	0.435072
887	DQB66D	13.1238	13.2424	13.0886
888	DQB66E	13.1238	13.2424	13.0886
889	DQB67I	13.1238	13.2424	13.0886
890	DQB67V	13.1238	13.2424	13.0886
891	DQB70R	1.55102	1.46006	1.01882
892	DQB70T	0.160534	0.159714	0.0154536
893	DQB70E	43.4909	43.3111	35.8968
894	DQB70G	2.85772	2.97397	3.06377
895	DQB71K	1.04773	1.08679	1.46982
896	DQB71T	24.499	24.3455	23.2493
897	DQB71R	0.160534	0.159714	0.0154536
898	DQB71D	43.4909	43.3111	35.8968
899	DQB71A	6.07239	5.88517	5.27842
900	DQB74A	1.04773	1.08679	1.46982
901	DQB74E	24.4961	24.3436	23.2048
902	DQB74S	27.5811	27.143	23.5084
903	DQB75V	24.4961	24.3436	23.2048
904	DQB75L	24.4961	24.3436	23.2048
905	DQB77R	6.84202	6.76781	7.03146
906	DQB77T	6.84202	6.76781	7.03146
907	DQB84Q	3.31957	3.46192	3.39036
908	DQB84E	3.31957	3.46192	3.39036
909	DQB85L	3.31957	3.46192	3.39036
910	DQB85V	3.31957	3.46192	3.39036
911	DQB86E	3.31957	3.46192	3.39036
912	DQB86A	2.55583	2.66649	2.73945
913	DQB860	0.426887	0.36496	0.185157
914	DQB86G	0.951624	0.966648	0.709759
915	DQB87L	3.31957	3.46192	3.39036
916	DQB87Y	3.82611	3.67919	3.49146
917	DQB870	0.426887	0.36496	0.185157
918	DQB87F	16.8056	16.8664	16.2156
919	DQB89T	3.31957	3.46192	3.39036
920	DQB89G	3.4098	3.54492	3.44357
921	DQB890	0.426887	0.36496	0.185157
922	DQB90T	3.31957	3.46192	3.39036
923	DQB90I	3.4098	3.54492	3.44357
924	DQB900	0.426887	0.36496	0.185157
925	DQB116V	2.83334	2.64256	2.57377
926	DQB1160	1.88688	2.00905	1.57292
927	DQB116I	6.07239	5.88517	5.27842
928	DQB125A	3.24571	3.3868	3.32263
929	DQB1250	1.88688	2.00905	1.57292
930	DQB125S	6.07239	5.88517	5.27842
931	DQB125G	15.1323	15.0372	14.7329
932	DQB126Q	1.54439	1.65317	1.45155
933	DQB1260	1.88688	2.00905	1.57292
934	DQB126H	0.179078	0.175014	0.0244473
935	DQB130R	2.53212	2.65789	2.00628
936	DQB1300	1.88688	2.00905	1.57292
937	DQB130Q	0.951624	0.966648	0.709759
938	DQB135D	0.560729	0.549916	0.97169
939	DQB135G	2.42753	2.49859	3.02526
940	DQB1350	1.88688	2.00905	1.57292
941	DQB136Q	1.85621	1.97832	1.55524
942	DQB136E	0.914219	0.877201	0.451762
943	DQB1360	1.88688	2.00905	1.57292
944	DQB140A	0.39097	0.396881	0.273791
945	DQB140T	1.27738	1.3329	0.962641
946	DQB1400	1.88688	2.00905	1.57292
947	DQB167R	17.5432	17.6371	15.2145
948	DQB167H	14.0627	13.8972	12.625
949	DQB1670	2.53212	2.65789	2.00628
950	DQB182S	0.0790284	0.0799924	0.0427616
951	DQB182N	1.27738	1.3329	0.962641
952	DQB1820	2.53212	2.65789	2.00628
953	DQB185T	11.4314	11.2927	9.98938
954	DQB185I	22.7241	22.7437	19.0742
955	DQB1850	2.53212	2.65789	2.00628
956	DQB197S	2.03906	2.05976	1.75485
957	DQB1970	2.32943	2.34875	2.03084
958	DQB197N	0.851489	0.848561	0.905169
959	DQB203I	5.21534	5.30048	5.37514
960	DQB2030	1.16907	1.19482	1.02741
961	DQB203V	2.84654	2.88925	3.25582
962	DQB220H	4.85129	4.93748	4.99579
963	DQB2200	1.16907	1.19482	1.02741
964	DQB220R	2.506	2.5452	2.87399
965	DQB221H	4.85129	4.93748	4.99579
966	DQB2210	1.16907	1.19482	1.02741
967	DQB221Q	2.506	2.5452	2.87399
968	DQB224Q	0.549883	0.504764	0.515446
969	DQB2240	1.16907	1.19482	1.02741
970	DQB224R	4.37727	4.23912	3.81257
971	DPB8V	44.4801	44.3143	39.0921
972	DPB8L	44.4801	44.3143	39.0921
973	DPB9Y	22.807	22.7044	20.1085
974	DPB9F	44.4801	44.3143	39.0921
975	DPB9H	20.3978	20.2303	17.7994
976	DPB11G	58.1779	57.8261	52.244
977	DPB11L	58.1779	57.8261	52.244
978	DPB33E	3.25938	3.24955	3.4361
979	DPB33Q	3.25938	3.24955	3.4361
980	DPB35Y	0.351558	0.327166	0.287317
981	DPB35F	0.0519708	0.0616594	0.0229823
982	DPB35L	1.16969	1.13659	0.614851
983	DPB36A	15.8567	15.5751	15.0039
984	DPB36V	15.8567	15.5751	15.0039
985	DPB55A	16.0792	15.8039	15.1676
986	DPB55D	18.4704	18.1178	16.6104
987	DPB55E	0.882914	0.845709	0.415467
988	DPB56A	18.4704	18.1178	16.6104
989	DPB56E	18.4704	18.1178	16.6104
990	DPB57E	42.5715	42.5358	37.5316
991	DPB57D	42.5939	42.5521	37.5345
992	DPB57A	0.23294	0.182299	0.110898
993	DPB65I	34.9211	35.0746	31.868
994	DPB65L	34.9211	35.0746	31.868
995	DPB69K	12.2986	11.9838	10.7975
996	DPB69E	8.67753	8.39994	7.17812
997	DPB69R	3.25938	3.24955	3.4361
998	DPB76V	12.7939	12.9635	10.885
999	DPB76M	15.3373	15.4428	13.3617
1000	DPB76I	2.16963	2.12167	2.19732
1001	DPB84D	36.8855	36.753	33.0201
1002	DPB84G	40.2606	40.1458	36.2238
1003	DPB84V	3.03942	3.07419	3.1435
1004	DPB85E	36.8855	36.753	33.0201
1005	DPB85G	36.8855	36.753	33.0201
1006	DPB86A	36.8855	36.753	33.0201
1007	DPB86P	36.8855	36.753	33.0201
1008	DPB87V	36.8855	36.753	33.0201
1009	DPB87M	36.8855	36.753	33.0201
1010	DPB96K	10.0662	10.0735	9.51515
1011	DPB960	7.82646	7.5975	7.6906
1012	DPB96R	0.0142349	0.0625141	0.0488316
1013	DPB170I	10.1394	10.1569	9.57808
1014	DPB1700	7.82646	7.5975	7.6906
1015	DPB170T	0.0346044	0.0866627	0.0295043
1016	DPB178L	17.824	17.6747	15.9658
1017	DPB1780	7.77198	7.53903	7.63916
1018	DPB178M	3.32258	3.44661	2.43444
1019	DPB194Q	3.22875	3.31383	3.68564
1020	DPB1940	7.00527	6.77887	6.87782
1021	DPB194R	13.1124	12.7682	13.3051
1022	DPB205V	6.93026	6.723	6.44972
1023	DPB2050	7.00527	6.77887	6.87782
1024	DPB205M	0.177103	0.15831	0.366431
1025	DPB215I	5.54601	5.33123	5.41633
1026	DPB2150	7.00527	6.77887	6.87782
1027	DPB215T	3.03942	3.07419	3.1435
