# Supplementary material for: Amino acid residues in five separate HLA genes can explain most of the known associations between the MHC and primary biliary cholangitis
Source: PLoS Genet. 2018 Dec 3;14(12):e1007833. doi: 10.1371/journal.pgen.1007833 (PMC6292650; doi:10.1371/journal.pgen.1007833)
Supplement: S8 Spreadsheet — (XLSX) [file pgen.1007833.s036.xlsx]

## Sheet: Fig4spreadsheet
aa1	deviance1	pv1	aa2	deviance2	pv2	aa3	deviance3	pv3	aa4	deviance4	pv4	aa5	deviance5	pv5
DQB860	194.426	3.43796e-44	DQB224Q	331.783	1.00727e-31	DPB205M	408.355	2.12403e-18	DPB33E	465.947	3.22425e-14	DRB58F	512.865	7.40407e-12
DPB9Y	246.096	1.84298e-55	DQB860	417.531	3.59593e-39	DQA175E	514.537	6.91261e-23	DRB13S	577.569	2.03379e-15	DQA50L	626.178	3.12437e-12
DQA53Q	207.429	4.99838e-47	DPB69K	372.686	8.0367e-38	DQB167R	509.223	1.52262e-31	DPB194Q	576.914	1.9124e-16	C95I	625.653	2.9243e-12
DQB.27S	194.426	3.43796e-44	DPB9H	327.872	7.22066e-31	DQA.6T	424.608	7.92136e-23	DRB58A	507.522	8.57238e-20	DPB76V	548.51	1.53121e-10
DRB73A	205.413	1.37637e-46	DPB170I	365.821	9.21386e-37	DQA53G	459.596	3.53489e-22	B275E	503.5	3.44878e-11	DRB13S	538.013	4.23473e-09
DPB57E	194.521	3.27731e-44	DPB76I	288.304	3.52052e-22	DRB85V	372.904	3.65331e-20	DQA.6M	451.695	6.90345e-19	DQA187A	545.813	2.97307e-22
DQA138I	192.689	8.22892e-44	DQB140T	329.552	1.29208e-31	DPB96R	429.647	1.45254e-23	DPB194Q	515.741	1.71618e-20	B199A	564.895	2.36573e-12
DRB74E	206.61	7.54278e-47	DQB203V	365.966	1.56461e-36	DPB36A	483.394	2.31274e-27	DPB178M	549.928	3.4394e-16	DPB76V	585.268	2.76847e-09
DQA75I	198.525	4.38247e-45	DQB86G	350.548	6.26246e-35	DPB36A	450.82	1.32824e-23	DPB194Q	519.537	1.13682e-16	DRB57D	556.24	1.37576e-09
DPB1940	269.07	1.8095e-60	DQB57S	432.941	1.61398e-37	DQB140T	528.225	1.64933e-22	DQA50L	577.995	1.72921e-12	C00	614.751	1.33876e-09
DPB205V	234.813	5.31861e-53	DQA1K	394.762	1.16079e-36	DQA34E	476.483	1.56694e-19	DQB30Y	557.258	2.52953e-19	DPB170I	610.248	3.3524e-13
DPB36A	202.682	5.42799e-46	DRB.24F	364.244	5.15497e-37	DQA11C	461.953	4.84837e-23	DQA53Q	528.461	3.4838e-16	B59H	573.15	2.31004e-11
DRB.16V	206.635	7.44939e-47	DPB76V	346.697	2.57972e-32	DRB10Q	463.516	3.14469e-27	DQB66D	528.353	8.1375e-16	DPB170T	567.844	3.296e-10
DQB56L	194.426	3.43796e-44	DQB116V	332.944	5.6155e-32	DPB65I	424.299	1.20042e-21	DPB8L	539.592	6.78823e-27	DQA130S	593.141	2.52296e-13
DPB215I	190.923	1.99883e-43	DQB125G	310.684	7.1365e-28	DRB71R	420.553	1.04718e-25	C73A	485.363	8.24764e-16	DQA41K	540.92	9.07876e-14
DQA160S	192.689	8.22892e-44	DPB9H	343.157	1.37022e-34	DQA175E	471.409	9.88666e-30	DPB35L	539.133	1.88005e-16	DQA47K	579.843	1.76575e-10
DQA47K	192.689	8.22892e-44	DPB35F	347.156	1.83119e-35	DQA207M	438.414	1.26125e-21	DPB57A	505.816	2.21405e-16	DRB.16A	573.313	2.11042e-16
DQA.7M	192.893	7.42733e-44	DQA69T	299.716	4.86835e-25	DQB30Y	384.76	2.91732e-20	DPB205M	446.606	3.714e-15	DPB9Y	502.786	6.61537e-14
DQA41K	192.689	8.22892e-44	DQB125G	329.604	1.25879e-31	DPB215I	377.226	5.16886e-12	DPB1780	465.702	5.14626e-21	DQA34E	501.564	2.11748e-09
DRB57D	174.099	9.41624e-40	DQA52R	278.178	1.94459e-24	DPB55D	332.398	1.7925e-13	DPB65I	383.243	9.99571e-13	DRB60Y	437.809	1.5027e-13
DQB57V	199.132	3.23067e-45	DPB65I	318.446	8.94013e-28	DQA138I	430.517	3.44696e-26	DPB84G	512.505	1.36879e-19	DQB30Y	581.893	8.08808e-17
DPB35F	201.588	9.40188e-46	DQB203V	359.806	2.77423e-36	DQA25F	463.551	2.30042e-24	DQA.6T	523.956	7.7239e-15	B99Y	560.896	1.21817e-09
DQA.6T	125.34	4.28898e-29	DQB57A	240.636	6.77654e-27	DPB76M	338.585	4.29269e-23	DPB194Q	422.527	5.09601e-20	DRB58A	487.791	6.54912e-16
DQA.7M	207.208	5.58613e-47	DQA53Q	319.338	3.34615e-26	DPB76M	382.354	2.04968e-15	DPB9H	439.749	3.56662e-14	DQB60N	491.064	7.86421e-13
DQA160A	207.122	5.83064e-47	DQA.7M	329.36	2.04727e-28	DPB36A	410.912	1.70713e-19	DQA.6T	443.948	9.04696e-09	DRB86V	479.411	2.59971e-09
DPB205V	197.444	7.54274e-45	DQA47K	361.694	1.33443e-37	DQA.7M	454.025	7.32993e-22	C156L	521.782	1.84976e-16	DRB57S	570.438	3.05126e-12
DQA.7M	192.247	1.02754e-43	DRB71E	309.41	2.64451e-27	DQA.13T	377.719	1.39804e-16	DPB55A	443.844	4.23127e-16	C114N	501.212	3.6155e-14
DQA138T	192.893	7.42733e-44	DPB9Y	364.153	3.92756e-39	DQA1K	468.458	1.73414e-24	DQB203I	538.707	5.22746e-17	DPB215I	592.7	2.01236e-13
DRB26Y	218.094	2.35546e-49	DPB178L	357.347	3.87754e-32	DQA207M	462.579	1.08634e-24	DRB11P	522.268	1.11136e-14	B.23R	554.671	1.25282e-08
DPB96K	226.69	3.1419e-51	DRB77T	389.629	2.57981e-37	DQA53G	508.912	9.08076e-28	DRB58Y	561.592	3.9245e-13	B67F	589.92	1.02441e-07
DRB70R	204.634	2.03557e-46	DPB8L	365.446	7.51838e-37	DQA.7M	455.268	2.6062e-21	B67Y	526.793	2.73785e-17	DRB10T	569.459	6.49224e-11
DQB136E	194.426	3.43796e-44	DPB96R	329.952	2.53367e-31	DQB55P	437.755	2.9688e-25	DQA160S	497.658	9.9622e-15	DPB205M	550.248	4.10968e-13
DQB86G	195.143	2.3979e-44	DPB170I	353.294	2.86777e-36	DQA26S	446.291	5.23816e-22	DQB1160	503.671	3.59251e-14	C113H	539.613	2.0324e-09
DPB84D	227.47	2.12327e-51	DQA47K	378.01	1.3211e-34	DRB67L	515.406	9.87951e-32	A152E	550.586	3.00616e-09	C156W	583.529	9.4884e-09
DQA.7M	192.247	1.02754e-43	DQA.6T	300.965	1.87166e-25	DPB170T	400.783	1.67015e-23	DPB9Y	508.188	3.62942e-25	DQB74S	575.547	2.26353e-16
DPB96R	204.585	2.08577e-46	DQA11Y	361.285	5.95324e-36	DQB56L	471.881	7.25467e-26	DQB125G	533.959	3.30118e-15	DPB11G	579.392	1.57963e-11
DQB860	194.426	3.43796e-44	DRB26F	316.564	2.15352e-28	DPB96R	420.211	2.41692e-24	DPB69E	477.763	3.29247e-14	DPB205M	530.848	3.1942e-13
DQA.7M	192.346	9.7774e-44	DQB9Y	317.714	4.22783e-29	DPB9H	410.207	6.75892e-22	C147L	457.757	5.35967e-12	DRB78V	498.057	2.17806e-10
DRB10E	195.065	2.49352e-44	DPB1940	379.701	4.71335e-42	DQA53G	454.363	5.58461e-18	DQB55R	530.291	2.94251e-18	DPB76M	569.908	3.08954e-10
DPB76V	244.85	3.44568e-55	DQA53Q	420.022	5.48916e-40	DQA107T	530.876	6.37205e-26	DQB30Y	582.667	6.17164e-13	C163T	622.222	3.1905e-10
DQA138I	192.689	8.22892e-44	DPB76M	333.263	1.9945e-32	DQA160D	424.619	1.19994e-21	B45T	486.073	4.53247e-15	A177E	525.461	3.47342e-10
DQB28S	198.458	4.53286e-45	DPB35F	343.43	2.17776e-33	DQA50L	455.85	2.89187e-26	DRB58S	518.93	1.9844e-15	DPB8L	561.765	5.95618e-11
DRB71K	202.115	7.21565e-46	DQA53G	325.697	1.03981e-28	DPB84D	450.238	6.41554e-29	DQB53L	504.405	1.8417e-13	C66K	534.952	3.25841e-08
DPB215I	278.826	1.35367e-62	DQA53Q	441.839	2.48459e-37	DRB10E	571.343	5.26129e-30	C99F	607.297	2.02029e-09	DRB51R	639.17	1.64593e-08
DRB70R	222.759	2.26219e-50	DPB69E	403.432	3.45645e-41	DRB51R	476.897	1.02428e-17	B67F	533.863	4.43304e-14	DRB10Y	585.595	6.36394e-13
DQB203V	194.457	3.3852e-44	DPB36A	323.447	6.8142e-30	DQB1970	402.762	5.29665e-19	DQA215F	461.839	1.5161e-14	C114N	500.811	4.30035e-10
DQB57S	194.426	3.43796e-44	DQB126Q	333.304	4.68437e-32	DPB33E	443.117	1.07645e-25	DPB57D	497.229	1.89395e-13	C.15I	548.113	9.79898e-13
DQB9L	194.426	3.43796e-44	DPB55D	351.382	5.23219e-36	DRB58N	454.844	2.65483e-24	DRB32H	504.41	1.91767e-12	C219R	552.018	5.20638e-12
DQB.10S	194.426	3.43796e-44	DPB35F	334.728	2.28683e-32	DQA40E	475.091	2.21734e-32	C156R	529.949	1.29531e-13	DQA.6M	569.917	2.58213e-10
DQB70T	194.426	3.43796e-44	DPB178M	281.065	1.30218e-20	DRB51R	359.338	8.97442e-19	DRB57S	424.375	7.3513e-16	DPB35L	481.508	4.07447e-14
DQB9L	194.426	3.43796e-44	DPB55A	341.192	8.82967e-34	DQA1K	445.254	1.96081e-24	DPB76M	520.288	4.62666e-18	DQA50L	578.648	2.18237e-14
DQB60N	194.426	3.43796e-44	DQB125A	306.306	3.79683e-26	DPB69E	381.896	3.49015e-18	B.230	439.581	3.07719e-14	DQA47K	485.799	1.05779e-11
DQA175E	189.497	4.09403e-43	DPB96R	331.137	1.16564e-32	DQB125A	455.048	8.81041e-29	DPB65I	515.735	6.69308e-15	DQB.10A	564.304	3.18734e-12
DQA41K	192.689	8.22892e-44	DPB69K	350.128	4.10445e-36	DQA175E	482.915	1.00673e-30	DQA47K	514.768	1.66249e-08	B116F	543.929	6.66159e-08
DQA160S	192.689	8.22892e-44	DQA215F	336.11	4.75526e-33	DPB9Y	467.446	2.09105e-30	DQB136Q	497.38	4.46993e-08	C0G	531.948	4.11682e-09
DRB74L	204.747	1.92321e-46	DPB55D	356.601	6.81961e-35	DQB26L	476.214	7.68806e-28	DPB215I	529.413	3.0147e-13	DRB71A	567.372	7.22379e-10
DPB76M	252.86	6.17855e-57	DRB70R	435.873	1.06594e-41	DQA.160	522.715	1.17529e-20	C1840	583.039	8.04594e-15	DQA75I	615.392	1.28564e-08
DRB70R	195.28	2.23793e-44	DQB140A	331.361	1.91554e-31	DPB36A	433.67	4.75068e-24	DQA41K	493.295	1.14793e-14	C99Y	542.822	1.95613e-12
DQB9L	194.426	3.43796e-44	DQA25F	349.714	1.21157e-35	DPB1940	441.44	9.95474e-22	DRB.24L	488.378	7.32584e-12	B152E	530.835	7.223e-11
DQB57S	194.426	3.43796e-44	DPB194R	338.759	3.00502e-33	DQB30Y	461.283	1.77241e-28	DRB13G	502.892	1.11486e-10	B114D	532.501	5.28539e-08
DQA187A	198.516	4.40286e-45	DQA160S	348.944	1.3974e-34	DPB76M	430.739	1.51008e-19	DPB35L	474.167	4.39737e-11	C156L	514.262	2.41868e-10
DQA129H	181.298	2.52302e-41	DPB36A	306.596	4.38084e-29	DQA11C	408.303	6.43569e-24	DPB178M	480.664	1.79264e-17	DPB9H	542.275	4.18575e-15
DPB35F	247.687	8.29134e-56	DQA.7M	398.5	1.15198e-34	DQA.6T	493.476	1.9266e-22	DPB96K	569.924	2.26142e-18	DQB126Q	630.13	8.54188e-15
DQA160S	192.689	8.22892e-44	DPB65I	329.317	1.45475e-31	DQB87F	424.605	1.6457e-22	DQA69T	471.735	6.64463e-12	B80I	521.992	1.34855e-12
DQB9L	194.426	3.43796e-44	DPB178L	336.953	7.45907e-33	DQB70R	458.268	3.26037e-28	DQA.7M	505.405	6.61801e-12	C77N	545.876	1.99568e-10
DPB65I	206.87	6.61951e-47	DRB670	382.752	3.84152e-40	DQA207V	497.307	9.85132e-27	DPB69E	559.329	3.39549e-15	DQB167R	597.502	6.4743e-10
DQA207V	194.916	2.68747e-44	DRB58F	335.659	1.83091e-32	DPB8L	454.469	1.15248e-27	DRB60Y	488.505	5.41018e-09	DPB84D	525.456	1.21141e-09
DQA75I	207	6.20045e-47	DRB28D	332.259	4.46582e-29	DPB96R	426.017	3.5656e-22	DQA207M	478.743	3.83547e-13	C194L	522.987	2.8995e-11
DPB35F	228.564	1.22601e-51	DRB70R	404.998	2.91172e-40	DQB126Q	505.569	1.142e-23	DQA40E	567.544	3.47889e-15	C156R	593.968	2.7411e-07
DQA130S	192.893	7.42733e-44	DPB36A	348.525	1.01877e-35	DQB71T	446.198	4.93643e-23	DQA69T	504.178	2.64789e-14	C116Y	550.509	9.98615e-12
DQA175E	199.526	2.65065e-45	DPB69E	353.958	1.86345e-35	DQA.6T	455.983	5.48231e-24	DQA129Q	532.882	1.79917e-18	DPB9Y	589.862	4.40227e-14
DQA160S	192.689	8.22892e-44	DPB194R	303.486	6.5553e-26	DQA47K	413.389	1.02912e-25	DQB197S	478.817	6.0284e-16	DPB76M	526.23	5.74902e-12
DRB26L	214.045	1.80078e-48	DPB76V	302.311	5.72246e-21	DPB96R	438.295	2.01082e-31	B.8L	503.097	8.28334e-16	DRB58N	570.05	2.77978e-16
DQB.27S	194.426	3.43796e-44	DPB9Y	319.625	4.60266e-29	DQB45E	400.081	2.97313e-19	DPB76I	469.848	6.67463e-17	C304M	509.001	3.91793e-10
DPB11G	206.522	7.8834e-47	DQA207V	379.986	1.29611e-39	DQB9L	514.438	4.35083e-31	DQA187A	558.304	3.51721e-11	C219W	604.007	1.37607e-11
DPB69K	261.776	7.03778e-59	DQA129Q	438.262	2.83613e-40	DQA.6T	533.646	1.56759e-22	B63E	600.533	2.87579e-16	DRB9E	641.318	1.6991e-10
DQA52R	201.389	1.0393e-45	DPB1940	362.84	5.4532e-37	C194V	445.22	1.1226e-19	DQA25F	523.25	1.01506e-18	DRB30Y	596.732	1.01532e-17
DPB65I	247.331	9.91644e-56	DQB.10S	403.966	6.14895e-36	DQA47K	498.158	2.86445e-22	DRB71E	558.219	9.19619e-15	DPB205V	590.78	1.15516e-08
DRB74R	195.549	1.95507e-44	DRB96E	310.622	7.58757e-27	DPB35F	393.778	7.58034e-20	DQA69T	465.573	2.38835e-17	DPB215I	509.866	2.82625e-11
DPB69K	208.811	2.49677e-47	DQA.6T	381.839	1.61322e-39	DQB55P	484.923	3.21262e-24	DQA160D	532.074	6.57138e-12	DQB57A	579.992	4.44513e-12
DQB9L	194.426	3.43796e-44	DQB66D	323.146	7.80978e-30	DPB84G	402.467	5.27812e-19	DQA175E	457.087	1.46283e-13	DPB9H	513.199	6.84623e-14
DPB11G	259.193	2.57312e-58	DQA.13T	421.613	3.34895e-37	DQA187A	547.643	3.02798e-29	C94I	577.975	3.64183e-08	DQB135D	611.92	5.66839e-09
DQB9L	194.426	3.43796e-44	DQA53G	350.556	7.92972e-36	DPB215I	461.25	6.90592e-26	DPB55E	579.534	1.50219e-27	DQB.10A	614.979	2.62412e-09
DQA53Q	194.252	3.75132e-44	DQB130R	338.604	2.97604e-33	DPB57E	462.446	9.12586e-29	DPB960	524.068	4.16095e-15	DQB55P	564.828	1.72098e-10
DRB96Y	218.094	2.35546e-49	DQB197S	333.101	7.84506e-27	DPB11L	427.531	2.53816e-22	DQA138I	481.281	2.27712e-13	B45E	523.102	1.00038e-10
DRB74E	192.909	7.36971e-44	DQA.16L	319.693	2.07133e-29	DQB87Y	392.506	1.42504e-17	DPB11G	453.891	4.69322e-15	DPB76I	491.366	9.26146e-10
DQB60N	194.426	3.43796e-44	DQB26G	321.02	2.27924e-29	DPB35F	378.66	3.14703e-14	DQA1E	422.082	4.41332e-11	C.150	451.229	6.71006e-08
DQB136E	194.426	3.43796e-44	DPB69E	344.756	1.46829e-34	DQB66E	452.521	3.02559e-25	DPB76V	521.279	1.11323e-16	DQA69T	564.624	4.58913e-11
DPB57D	242.818	9.55348e-55	DQA1E	410.719	2.1271e-38	DQB136E	535.677	5.19648e-29	DQB26L	577.947	7.95347e-11	B.16L	611.192	8.12178e-09
DRB9K	195.065	2.49352e-44	DQA.7V	352.461	4.19436e-36	DPB8L	434.121	1.61635e-19	DPB33E	501.384	2.37568e-16	C156W	540.243	4.55664e-10
DQB203V	194.457	3.3852e-44	DQA25F	319.697	4.50985e-29	DPB69E	431.68	3.60328e-26	DQA50L	484.743	3.22963e-13	DPB35L	520.135	2.69605e-09
DPB57E	200.469	1.6497e-45	DRB96H	367.236	3.76237e-38	DQA215F	473.324	7.05196e-25	DRB71A	531.114	2.91638e-14	C304V	573.979	5.865e-11
DQB13A	198.385	4.7012e-45	DQB89G	347.708	2.43816e-34	DPB11G	469.416	2.67451e-28	C116S	512.348	5.66782e-11	DQA207M	556.249	3.45365e-11
DPB96R	204.336	2.36454e-46	DQA187A	385.534	2.65277e-41	DQA.7M	473.715	5.97302e-21	B66I	515.569	9.8347e-11	DQA160A	558.375	6.0444e-11
DQB220R	195.094	2.45731e-44	DQB140T	330.225	3.09119e-31	DPB69E	425.532	1.63022e-22	DPB215I	486.617	5.46644e-15	DPB96K	542.179	9.05603e-14
DQB860	194.426	3.43796e-44	DPB76M	335.28	1.73186e-32	DPB84D	436.837	6.9421e-24	DQA47K	529.267	6.97683e-22	DQB.27A	593.353	1.19054e-15
DRB13F	204.554	2.1186e-46	DQA160S	302.111	5.23467e-23	DRB233T	393.554	1.14842e-21	DPB96R	466.882	1.09758e-17	DPB69E	515.301	3.44321e-12
DRB31I	204.704	1.96469e-46	DPB33E	315.513	6.51679e-26	DPB96R	434.836	8.90057e-28	DQB13A	503.815	9.95205e-17	C261V	539.465	2.36096e-09
DQA.7V	198.47	4.50529e-45	DQB860	349.826	8.75971e-35	DPB55D	439.363	3.01037e-21	DPB57E	527.32	6.68993e-21	C95I	570.606	4.7288e-11
DQA207M	192.689	8.22892e-44	DRB10Y	326.326	6.55934e-31	DPB69E	422.554	1.02399e-22	DPB35L	492.771	5.31346e-17	DQB140A	543.692	9.61571e-13
DRB670	195.065	2.49352e-44	DQA129H	331.513	1.59199e-31	DPB84D	428.138	8.38009e-23	C248V	470.482	7.65506e-11	C77S	489.129	1.57282e-05
DQB60N	194.426	3.43796e-44	DPB9H	366.535	2.56239e-39	DQA160D	469.38	3.6226e-24	DQA107T	532.97	1.53242e-15	DPB96R	570.456	9.20665e-10
DPB36A	230.124	5.60017e-52	DQB.27S	402.38	2.37971e-39	DQA.6T	492.556	2.17891e-21	DQA129H	570.704	9.56007e-19	C114N	624.561	2.15613e-13
DQB.18A	195.143	2.3979e-44	DQA53Q	351.662	6.52025e-36	DPB9H	471.286	7.64752e-28	DPB205M	561.702	1.92926e-21	DRB13S	597.525	2.16082e-09
DQA138I	192.689	8.22892e-44	DPB205V	306.89	1.17753e-26	DQB30Y	416.313	1.31118e-25	DRB74R	469.814	2.58473e-13	DQB45E	502.751	9.51951e-09
DQA130S	207.208	5.58613e-47	DPB170I	391.301	6.19136e-42	DQA47K	482.959	1.03029e-21	DPB194Q	560.996	1.01103e-18	DQB53L	629.815	1.07918e-16
DQB185I	194.587	3.17117e-44	DPB55A	337.673	5.62709e-33	DQB2030	436.969	2.1752e-23	DQA.16M	487.2	1.36633e-12	DPB178L	522.005	3.64482e-09
DQB86G	192.216	1.0438e-43	DQB74S	324.617	1.22287e-30	DPB55D	406.55	1.4077e-19	DPB33E	502.369	1.25859e-22	DRB31I	544.053	1.07278e-10
DPB76M	238.472	8.46996e-54	DQB70R	345.199	5.10929e-25	DRB11V	492.676	6.17205e-34	DRB71R	537.305	2.38162e-11	DQA138T	562.387	5.49516e-07
DPB11G	239.535	4.96614e-54	DQA53Q	346.191	5.29751e-25	DQB86G	431.845	2.14343e-20	DQA25F	537.803	7.53128e-25	DPB55E	575.262	9.33524e-10
DPB11G	223.076	1.92973e-50	DQB70T	418.438	2.14804e-44	DQA1E	547.943	5.25759e-30	DPB205M	600.346	4.51961e-13	DQB140A	646.548	1.06698e-11
DRB.1S	195.065	2.49352e-44	DQB140T	336.232	1.47905e-32	DPB178L	438.47	4.92386e-24	DPB84V	499.3	6.22294e-15	DPB76M	552.196	3.51705e-13
DQA.7V	206.924	6.44275e-47	DQA53G	366.926	1.13021e-36	DPB57A	439.695	1.45719e-17	DPB35F	497.253	3.28176e-14	DQA.16M	532.096	3.57442e-09
DRB9K	195.065	2.49352e-44	DPB96R	347.737	4.5188e-35	DQA53G	452.471	1.39651e-24	DPB35F	512.799	8.03036e-15	DQB.10A	562.151	2.13942e-12
DRB26Y	198.785	3.84475e-45	DRB71E	320.912	2.16531e-28	DPB96R	408.758	7.07645e-21	DQB140T	453.194	2.62779e-11	C95I	494.518	1.29025e-10
DPB76M	240.647	2.84241e-54	DQB.10S	401.542	7.21027e-37	DQA187A	500.328	2.81401e-23	DRB13S	560.6	8.25943e-15	DRB70D	599.301	4.93975e-10
DRB11L	195.468	2.03693e-44	DPB194R	356.975	5.29954e-37	DQB13A	445.31	5.52606e-21	DQA160S	507.831	2.63694e-15	C156L	560.931	3.16902e-13
DQB136E	194.426	3.43796e-44	DPB9H	351.663	4.54241e-36	DQB182S	472.585	3.97575e-28	DPB84G	530.982	2.14221e-14	DRB73G	573.97	5.50535e-11
DPB8L	192.694	8.20859e-44	DQB66E	342.254	2.16327e-34	DQA160D	447.81	9.22614e-25	DPB76V	503.478	8.58013e-14	DRB31I	561.698	2.34372e-14
DPB11G	250.082	2.4915e-56	DQB56L	403.667	2.85408e-35	DQB2030	512.546	1.72543e-25	DPB65I	562.194	1.83932e-12	DQA.13A	609.544	5.93807e-12
DPB55D	216.094	6.43145e-49	DQA207M	378.293	3.74412e-37	DQA.7M	507.688	5.55717e-30	C116S	557.617	1.59396e-12	DQB860	589.877	1.34883e-08
DQB9L	194.426	3.43796e-44	DQB30Y	323.493	6.55706e-30	DPB35F	402.392	6.53569e-19	DPB1940	451.47	2.46057e-12	DPB9Y	503.562	5.29599e-13
DPB65I	280.266	6.5698e-63	DQA160S	441.505	6.06672e-37	DQA41K	536.906	1.55504e-22	DQA.16M	606.403	7.65179e-17	C194V	651.918	1.5151e-11
DRB85V	195.225	2.30127e-44	DPB96R	323.919	7.91074e-30	DRB51R	395.528	2.62426e-17	DQA.6T	455.372	1.02673e-14	DRB13G	506.906	7.037e-13
DRB149Q	198.869	3.68701e-45	DPB35F	376.495	1.59867e-40	DQA47K	500.753	7.39662e-29	DPB1780	553.42	3.95165e-13	DQA130S	605.838	4.48578e-13
DPB76V	201.319	1.07632e-45	DQA138I	359.086	3.48028e-36	DQB30Y	461.238	5.14294e-24	DQA69T	512.334	8.7927e-13	C114D	567.949	8.81424e-14
DPB8L	209.948	1.40986e-47	DQB.10S	392.798	1.15683e-41	DRB32Y	503.479	6.94891e-26	DQA160D	563.054	1.177e-14	DPB96K	615.443	4.55268e-13
DRB96H	170.269	6.46297e-39	DQB.10A	310.691	2.15268e-32	DPB9H	404.797	2.99084e-22	DPB33E	464.01	1.41434e-14	C116Y	516.113	5.26881e-13
DQA138T	207.208	5.58613e-47	DPB76M	364.731	3.93384e-36	DQA69T	455.683	1.47185e-21	B178K	509.896	1.79878e-13	DQB66D	539.948	4.20717e-08
DPB57D	231.562	2.72083e-52	DQA160D	365.824	4.78867e-31	DQB30Y	464.361	3.18932e-23	DRB58S	507.389	5.39813e-11	DPB194R	542.954	2.46577e-09
DQB203V	186.465	1.87953e-42	DQA.7M	295.652	1.47626e-25	DPB8L	405.358	1.137e-25	DQA.13T	470.969	5.49314e-16	B67S	515.078	3.10479e-11
DQB136E	194.426	3.43796e-44	DRB67F	313.836	8.51729e-28	DPB9H	382.444	1.20104e-16	DPB178M	448.773	3.81629e-16	DPB205M	536.323	8.21616e-21
DPB57E	239.197	5.88479e-54	DQB60N	400.937	4.71649e-37	DRB10Y	478.855	1.07409e-18	C184H	539.51	6.7994e-15	DQB197S	586.293	7.92846e-12
DQA160S	192.689	8.22892e-44	DQB220H	323.832	2.30378e-30	DPB9Y	403.433	4.5828e-19	DPB57A	484.475	2.20972e-19	C194V	533.233	2.89605e-12
DPB57E	270.973	6.96265e-61	DQA207V	422.79	6.94736e-35	DQB71A	509.588	1.20209e-20	C219W	557.556	4.33227e-12	DQB135D	603.98	9.52429e-12
DRB.16V	194.908	2.69861e-44	DQA130S	305.115	8.82638e-26	DPB35F	421.511	3.89245e-27	DQB.27A	494.626	1.22324e-17	DPB57A	544.879	1.35108e-12
DQB28S	195.266	2.2545e-44	DPB55A	361.586	4.70769e-38	DRB60Y	459.998	3.39889e-23	DQB185T	530.734	4.08299e-17	DPB960	572.139	1.23752e-10
DQA207M	192.689	8.22892e-44	DPB9H	350.963	2.69721e-36	DQB55P	466.578	5.77109e-27	DPB69K	511.811	1.74929e-11	DQA.7M	552.111	2.1775e-10
DPB36A	229.889	6.30391e-52	DRB96E	404.122	8.80358e-40	DQA138T	497.727	3.85186e-22	DQA25F	571.338	9.51237e-18	B.23R	610.886	3.20103e-10
DPB9Y	253.86	3.74139e-57	DRB11L	426.702	1.77157e-39	DQA175E	550.359	1.00157e-28	C152E	607.277	4.54286e-14	DQA53Q	647.222	2.61194e-10
DQB57D	202.936	4.7767e-46	DQB9F	341.447	5.63543e-32	DPB11G	452.109	7.01744e-26	DQA69L	495.222	5.16567e-11	DRB57V	524.27	7.05978e-08
DPB8L	179.728	5.55754e-41	DRB58F	325.942	1.16528e-33	DQA53G	403.377	1.372e-18	DQB.270	479.282	2.97649e-18	DRB96E	523.589	2.80733e-11
DRB58D	195.065	2.49352e-44	DQA160D	352.325	4.49095e-36	DPB36A	451.55	2.25379e-23	DPB9H	502.14	1.13856e-12	B194V	533.568	2.06968e-08
DQB9L	194.426	3.43796e-44	DRB47F	338.301	3.78314e-33	DPB194Q	416.244	1.06069e-18	DPB35L	463.318	6.83694e-12	DQA160A	486.893	1.2012e-06
DQA69T	207.208	5.58613e-47	DPB96K	373.975	3.7604e-38	DQB26L	497.404	1.12322e-28	DQA129H	536.123	4.89503e-10	C9Y	581.747	1.43258e-11
DRB74L	195.419	2.0877e-44	DQB87F	307.989	2.67952e-26	DPB84D	424.685	3.34629e-27	C194V	465.081	2.07425e-10	DQB60N	500.834	2.23968e-09
DRB58F	197.749	6.47308e-45	DPB11G	357.546	1.25312e-36	DQA160A	479.064	2.94339e-28	DQB87Y	516.466	9.60918e-10	C00	549.874	7.47188e-09
DQA1E	207.208	5.58613e-47	DPB36A	354.959	5.37598e-34	DQB197S	487.166	1.34806e-30	B45T	527.138	2.57572e-10	DPB69E	549.203	2.6364e-06
DQA53G	204.454	2.22827e-46	DPB84G	359.812	1.16924e-35	DQB135D	482.238	1.86223e-28	DPB76I	572.169	2.46571e-21	DQA.7M	613.171	1.52091e-10
DQB70E	194.55	3.22947e-44	DPB9H	364.537	7.44932e-39	DQA.13T	455.497	1.46579e-21	DPB76I	513.792	2.25688e-14	DQA69T	577.429	1.49602e-15
DQB86G	194.55	3.22947e-44	DPB35F	320.182	3.7014e-29	DQB71T	379.154	1.60001e-14	DPB178L	426.061	7.44233e-12	DQA75I	472.171	1.11771e-11
DQB.10S	194.426	3.43796e-44	DPB76I	328.629	4.932e-31	DQA25F	425.926	5.96804e-23	DQB74E	503.116	1.5523e-18	DPB57D	578.112	4.71662e-18
DQB.18A	194.457	3.3852e-44	DPB9Y	326.33	1.59512e-30	DRB71A	427.251	9.57211e-24	DPB84G	498.989	2.45679e-17	DQA47K	562.589	1.52491e-15
DPB205V	242.271	1.25728e-54	DQA207V	421.637	6.66697e-41	DQA34E	523.311	6.54586e-24	DQA40E	564.759	1.21034e-10	DQA160A	598.201	7.34372e-09
DQA138I	192.689	8.22892e-44	DPB170T	325.799	8.55628e-31	DQA47K	425.449	1.81842e-23	DQB57A	501.122	3.34648e-18	DPB36A	561.191	9.16225e-15
DQB71A	195.174	2.36103e-44	DQB57A	335.263	2.5456e-32	DPB36A	445.025	1.1045e-25	DPB84G	530.406	2.46133e-20	B.16V	557.403	2.038e-07
DPB178L	205.083	1.62469e-46	DQA53G	387.217	1.65718e-41	DQA207M	511.857	6.10085e-29	DPB76V	606.595	2.17415e-22	A152E	637.415	2.83042e-08
DPB69E	218.608	1.81969e-49	DQA160S	373.536	1.45218e-35	DQB30Y	434.797	4.99835e-15	DQA215F	503.747	1.00991e-16	C95I	543.65	2.66942e-10
DQA.13T	207.208	5.58613e-47	DQB77R	332.954	3.49369e-29	DPB69E	398.95	4.51859e-16	DRB86V	451.409	4.39237e-13	B282I	498.269	7.62723e-12
DPB960	222.692	2.34013e-50	DQA138T	390.95	1.7769e-38	DQA.6T	515.371	6.81288e-29	DRB26F	546.346	2.61398e-08	DQB26L	576.962	3.14511e-08
DQB140A	196.184	1.42118e-44	DQB.27A	338.684	7.55862e-33	DPB57E	405.683	2.71664e-16	DPB194R	466.393	6.61242e-15	DPB55D	549.516	7.71282e-20
DQB70E	194.457	3.3852e-44	DQB38A	336.371	1.01522e-32	DPB96R	443.67	3.8291e-25	C163T	488.018	2.74942e-11	DQA47K	533.072	1.91616e-11
DQA69T	194.916	2.68747e-44	DQB220H	337.046	9.10811e-33	DPB84D	470.717	6.44782e-31	DPB205V	520.956	1.36121e-12	DPB9H	568.589	5.13925e-12
DQA207M	192.689	8.22892e-44	DQA129H	356.398	1.75157e-37	DPB9H	480.26	9.0305e-29	DPB55D	583.076	3.67684e-24	DQA1E	618.969	2.0846e-09
DQB.18A	198.369	4.73906e-45	DQA.6M	306.382	2.6704e-25	DPB215I	404.582	3.78135e-23	DPB96R	472.943	1.36198e-16	DQA.7V	527.789	1.30339e-13
DRB31I	198.524	4.38427e-45	DPB35Y	353.802	1.21729e-35	DQB167R	484.113	3.50493e-30	DQA215F	530.756	8.51737e-12	C.150	576.184	1.58312e-11
DQB.18V	194.587	3.17117e-44	DQB125A	334.43	2.88014e-32	DPB84G	436.031	6.79051e-24	DPB35L	489.125	3.17963e-13	DRB38L	527.992	4.53696e-10
DQB203V	198.369	4.73906e-45	DQA160A	354.186	9.28383e-36	DPB76M	481.178	1.86546e-29	DPB205M	549.17	1.64147e-16	DPB55A	585.131	2.01261e-09
DQA.6M	207.208	5.58613e-47	DPB170I	362.692	1.09724e-35	DQB140A	486.875	7.68115e-29	DPB76I	556.428	7.44102e-17	DQA41K	594.393	7.20188e-10
DPB205V	250.361	2.16646e-56	DRB57S	422.721	2.25835e-39	DQB136Q	531.526	1.79029e-25	C99F	586.034	1.54836e-13	DPB69E	630.252	2.93787e-11
DQA160D	207.208	5.58613e-47	DQB30Y	352.287	2.06326e-33	DPB76V	422.012	6.81773e-17	DPB84G	482.416	7.72466e-15	DPB960	538.361	7.45532e-14
DPB76V	181.791	1.96942e-41	DQB130R	349.879	1.93574e-38	DQB57A	434.709	3.25126e-20	DPB9H	494.501	1.05446e-14	DQA129H	551.092	5.36635e-14
DRB57A	204.621	2.04912e-46	DPB170T	331.395	2.08155e-29	DQA138I	420.176	4.41059e-21	DRB74E	507.62	8.6704e-21	DPB205M	553.148	1.50414e-11
DPB96K	288.24	1.20266e-64	DQB.10S	455.079	3.62579e-38	DQB57D	570.241	7.25301e-27	DQA54F	611.265	1.50392e-10	DQB1970	641.146	4.59458e-08
DQA138T	207.208	5.58613e-47	DQB140T	333.597	2.52701e-29	DPB76I	397.87	1.08321e-15	DQA41K	449.849	5.6106e-13	B163E	492.231	7.50492e-11
DQA129H	204.505	2.17125e-46	DRB.16V	345.867	1.34118e-32	DPB84G	400.757	1.27489e-13	DQB70R	451.793	9.06718e-13	DPB76M	493.059	1.32875e-10
DPB205V	248.287	6.13726e-56	DRB38L	415.237	3.42979e-38	DQA.7M	512.708	5.46577e-23	DQA.6T	574.653	3.53096e-15	B.8V	614.092	3.38491e-10
DRB28E	190.404	2.59538e-43	DPB65I	358.127	2.3257e-38	DQA25F	443.192	2.88615e-20	DPB170T	497.488	1.72469e-13	DRB74A	547.833	1.28961e-12
DQA.13T	189.725	3.65038e-43	DQA69L	306.017	4.10152e-27	DPB11G	411.175	1.12823e-24	DRB74L	473.018	3.71876e-15	C24A	517.446	2.63868e-11
DQB57V	199.132	3.23067e-45	DPB84D	371.343	2.43352e-39	DQA25F	461.722	1.96649e-21	DQA26S	518.063	6.09325e-14	DQA47K	554.075	1.96059e-09
DRB51R	195.08	2.47439e-44	DPB1780	322.599	1.43016e-29	DQB86A	426.127	2.56782e-24	DQA26S	479.286	3.07607e-13	C9Y	521.291	9.10589e-11
DQA.6M	207.208	5.58613e-47	DQB57A	346.316	4.16945e-32	DPB57E	452.932	5.40486e-25	DQA52R	493.417	1.98099e-10	DPB170I	521.158	1.38706e-07
DPB55D	207.894	3.95657e-47	DQA47K	367.446	1.41748e-36	DRB233T	466.369	2.62514e-23	DQB9F	542.879	2.19134e-18	C147L	585.416	6.93663e-11
DPB84D	199.188	3.14087e-45	DQB9L	370.053	4.78965e-39	DQB9F	473.84	2.25191e-24	DPB36A	511.071	1.04967e-09	DQB70R	543.32	1.35581e-08
DRB77T	195.836	1.69238e-44	DPB69E	344.869	2.82032e-34	DPB35L	446.352	7.20876e-24	DRB.1S	520.046	9.12425e-18	DQB.270	572.837	3.71e-13
DPB96R	253.452	4.59198e-57	DQA25F	419.305	5.95532e-38	DQB60N	544.92	3.7329e-29	DQB135D	599.523	1.47535e-13	C219W	635.958	1.57789e-09
DQB86G	194.377	3.52329e-44	DQB1160	325.585	2.22963e-30	DPB9H	402.45	1.83067e-18	DPB178M	465.366	2.15765e-15	B103V	500.948	2.44508e-09
DQA26S	204.304	2.40285e-46	DQB26G	331.814	1.43621e-29	DPB9H	434.934	3.15513e-24	DPB69K	475.176	2.24386e-10	DPB57E	521.929	8.04968e-12
DRB26Y	198.785	3.84475e-45	DQB203I	333.257	4.30834e-31	DPB76M	444.112	6.36756e-26	DPB170T	518.371	6.85118e-18	DPB55A	553.793	2.65418e-09
DQA.13T	207.208	5.58613e-47	DPB170I	389.546	1.49609e-41	DPB76I	466.625	1.64201e-18	DRB58F	540.094	1.0226e-17	DRB71K	588.721	3.09505e-12
DQA.7M	207.208	5.58613e-47	DPB1940	348.528	1.36917e-32	DQB224Q	480.314	1.66657e-30	DPB55E	549.254	1.01491e-16	C116F	600.723	7.2729e-13
DRB85A	204.432	2.25274e-46	DQA.6M	339.961	2.52938e-31	DPB69K	435.156	1.72545e-22	DQA129H	499.375	1.11306e-15	C261V	545.789	9.57363e-12
DPB65I	222.48	2.60313e-50	DQB860	389.611	3.13189e-38	DQA69T	482.232	6.33201e-22	DQA53Q	552.944	4.13364e-17	C138K	582.088	6.71871e-08
DPB76V	252.398	7.79302e-57	DQB45E	425.337	1.68758e-39	DQA1E	520.072	2.17679e-22	DQA.7V	580.4	8.02848e-15	C00	617.933	8.98886e-10
DPB194R	273.739	1.73777e-61	DRB96E	421.439	5.51807e-34	DQB57V	534.623	1.96661e-26	C94I	582.437	4.68451e-12	C11A	621.639	3.82249e-10
DPB9Y	201.613	9.28709e-46	DQA.13T	382.555	3.01769e-41	DQA.7M	512.069	5.23534e-30	DQB185T	556.775	2.28967e-11	C116F	589.774	9.21761e-09
DQB74S	199.766	2.34927e-45	DPB960	366.558	3.71349e-38	DRB.16A	481.845	6.81078e-27	DQA207V	512.977	2.41034e-08	C219W	542.236	6.33154e-08
DPB11G	235.218	4.33851e-53	DRB.1S	396.144	7.10333e-37	DQA.7V	476.651	2.89607e-19	DQA69T	529.702	3.2509e-13	B167S	581.934	4.93039e-13
DPB84D	189.121	4.94595e-43	DRB60S	336.58	6.22856e-34	DRB.16A	433.863	6.00879e-23	DPB9H	510.788	1.77559e-18	DQB30Y	580.446	7.05434e-17
DPB215I	222.623	2.42298e-50	DQB126Q	349.351	2.12983e-29	DQA160D	438.274	4.10551e-21	DRB74E	508.811	4.51798e-17	DQA.7V	551.557	6.23313e-11
DPB76M	251.184	1.43335e-56	DRB.24F	408.662	4.0232e-36	DQA26S	523.692	7.7534e-27	DPB35F	573.162	2.01404e-12	C156W	606.773	6.73156e-09
DQA.6T	192.689	8.22892e-44	DQB66D	329.912	1.07799e-31	DPB96R	424.268	2.63618e-22	DPB69E	510.515	1.58775e-20	C116F	564.538	1.98112e-13
DQB.18V	195.094	2.45731e-44	DPB76M	323.811	7.8223e-30	DQB57D	428.515	1.41817e-24	DPB960	504.134	3.44001e-18	DRB.16A	539.802	2.3393e-09
DRB74L	209.579	1.69736e-47	DQB.18V	345.675	1.90072e-31	DPB76M	436.765	1.37284e-21	DRB10Q	493.549	4.86354e-14	DPB11G	548.932	9.91912e-14
DQB125G	195.302	2.21371e-44	DPB96R	319.275	8.54033e-29	DQB37Y	397.308	1.01341e-18	DQA.16M	453.631	6.14938e-14	DPB960	502.045	3.44934e-12
DQB86G	195.143	2.3979e-44	DQB70R	334.964	2.91288e-32	DPB96R	416.908	1.39977e-19	DQA.6T	457.562	1.81724e-10	C95I	498.916	1.27009e-10
DRB10E	195.065	2.49352e-44	DQA207M	303.839	1.81921e-25	DPB65I	404.431	1.13016e-23	DQA69L	465.08	6.82087e-15	DPB178M	518.053	3.38183e-13
DRB51R	195.08	2.47439e-44	DPB65I	346.36	9.10694e-35	DQB55R	468.186	2.51884e-28	DQA160D	515.126	7.32009e-12	B67F	546.251	2.41994e-08
DPB69K	194.976	2.60823e-44	DQA47K	359.326	1.26798e-37	DRB70D	489.037	4.74165e-30	DQA130S	534.746	1.37141e-11	DPB76I	581.027	1.02489e-11
DQB860	194.426	3.43796e-44	DPB76M	346.873	5.06002e-35	DQA560	474.324	1.47974e-29	DPB57A	541.666	2.28323e-16	DQB203I	590.507	2.77521e-12
DRB11L	194.857	2.76803e-44	DRB74L	315.587	4.37928e-28	DPB96K	384.889	8.44643e-17	DQA160S	450.987	4.29033e-16	C152E	502.467	7.23445e-13
DQA1K	192.689	8.22892e-44	DPB55D	373.101	3.94085e-41	DQA.13A	513.431	2.25385e-32	C163T	555.41	9.22539e-11	DPB178L	591.902	1.53304e-09
DQB86G	194.377	3.52329e-44	DQB66E	321.447	1.79352e-29	DPB69K	409.408	6.67619e-21	DRB58N	476.467	2.63454e-16	B97T	508.755	1.32965e-08
DPB9H	292.825	1.20525e-65	DRB51R	431.753	4.56759e-32	DQB.270	553.441	2.70074e-28	B95L	585.543	1.46287e-08	C219R	618.914	7.61729e-09
DRB30Y	196.11	1.47461e-44	DQB26G	358.145	4.06521e-37	DPB84V	423.893	5.12442e-16	B.11W	461.224	9.96694e-10	DQA.13A	504.033	6.0369e-11
DRB96Y	194.494	3.32273e-44	DPB194R	364.516	7.31719e-39	DQA41K	464.271	1.72421e-23	DQA215F	543.638	5.15861e-19	DPB1940	583.801	2.336e-10
DQB57D	214.228	1.64226e-48	DPB69K	393.559	6.78484e-41	DRB74E	489.772	1.0315e-22	DQA160S	553.662	1.31601e-15	B9D	591.211	8.9115e-10
DQA207M	192.689	8.22892e-44	DPB9H	323.06	3.3993e-30	DPB69E	435.113	3.47907e-26	DQA.6T	534.29	2.30938e-23	DQA.7V	599.139	8.08684e-16
DQB56L	194.426	3.43796e-44	DPB170I	358.37	1.55601e-37	DQA34E	473.837	6.21662e-27	DPB65I	525.541	6.4537e-13	DQA.7V	581.648	6.86462e-14
DRB.25K	196.108	1.47628e-44	DPB55D	355.475	1.55556e-36	DQA138I	446.659	1.30941e-21	DPB960	527.227	2.80829e-19	C9Y	596.152	1.02282e-16
DRB.1S	195.065	2.49352e-44	DPB35F	322.489	1.5005e-29	DQB53L	443.785	3.29101e-28	DPB205M	522.21	8.31135e-19	DQA47K	571.744	1.94985e-12
DQA50L	194.402	3.48036e-44	DQA138I	350.621	7.5822e-36	DPB35F	450.984	1.26827e-23	DPB57D	503.889	3.50126e-13	C116S	541.709	7.75926e-10
DPB178L	257.582	5.77514e-58	DQB87F	387.942	3.41826e-30	DQA.16L	482.686	2.16678e-22	DRB58S	537.191	1.55061e-13	C113H	568.335	2.39592e-08
DRB57A	207.767	4.21801e-47	DPB9H	318.526	6.68229e-26	DQA.7M	413.495	1.93325e-22	DQB66D	510.032	8.76211e-23	DPB178M	572.664	2.49088e-15
DQA1E	194.916	2.68747e-44	DQB.27S	351.177	7.4239e-36	DPB170I	470.959	7.05978e-28	DQA560	549.949	6.24209e-19	C00	575.746	3.79373e-07
DQB56L	194.426	3.43796e-44	DRB32H	313.941	8.07971e-28	DPB69E	397.903	5.04266e-20	DPB178L	464.061	4.16195e-16	DPB194Q	533.693	7.14576e-17
DQA52R	200.304	1.79221e-45	DQB57S	328.765	8.9006e-30	DPB178L	402.933	7.17305e-18	DPB57A	460.383	3.46703e-14	DQA138I	512.996	4.06185e-13
DRB26Y	194.396	3.49031e-44	DQA215F	328.686	4.71956e-31	DPB178L	431.02	4.69075e-24	DRB67I	477.876	7.6413e-12	B32L	506.686	7.98619e-08
DQA.7V	202.904	4.85332e-46	DPB84D	373.378	5.82997e-39	DRB58S	460.774	8.88233e-21	DPB69E	500.108	3.57167e-10	DQB9Y	538.727	5.1525e-10
DQA.160	192.689	8.22892e-44	DPB35F	328.348	2.36912e-31	DRB71A	410.345	1.36294e-19	DPB170I	480.419	5.7138e-17	DQA53G	539.929	1.21672e-14
DQB.10S	194.426	3.43796e-44	DPB35F	379.942	3.0275e-42	DQB1970	486.055	6.96493e-25	DPB84G	527.962	9.5711e-11	DRB58L	565.098	1.102e-09
DQA69T	207.208	5.58613e-47	DPB96R	363.58	7.01932e-36	DQB71T	500.673	1.15045e-31	DQA47K	544.753	3.15326e-11	DPB84G	588.098	4.58946e-11
DQB30Y	137.567	9.0644e-32	DQB87F	284.966	6.41963e-34	DPB84D	374.866	2.50499e-21	DQA129Q	436.281	4.62146e-15	DPB9H	478.351	8.80628e-11
DRB60S	209.797	1.52096e-47	DRB58Y	327.35	2.1724e-27	DPB69E	429.59	4.91979e-24	DQA138T	498.569	9.95022e-17	DPB9H	542.533	3.34424e-11
DRB26L	216.02	6.67754e-49	DRB11S	307.655	1.04203e-21	DPB35F	378.477	3.9102e-17	DQA107T	442.569	1.18715e-15	DQB70T	485.88	4.67009e-11
DQB77R	207.58	4.63265e-47	DQB.18A	345.681	6.92525e-32	DPB76M	442.974	5.98063e-23	DQA26S	486.12	5.08023e-11	C116F	532.671	8.92689e-12
DQB220R	191.355	1.60924e-43	DQA41K	298.651	3.83282e-25	DPB55A	384.549	1.89528e-20	DPB76M	522.258	8.43462e-32	DQA160D	567.293	1.93559e-11
DQA.7M	207.208	5.58613e-47	DQB87Y	343.365	1.84323e-31	DPB170T	435.845	6.8022e-22	DPB194Q	489.193	2.79377e-13	A9S	533.653	2.59619e-11
DPB55D	253.782	3.89005e-57	DQB86G	414.422	8.19823e-37	DQB203I	531.652	2.55706e-27	C73A	574.277	6.62948e-11	DQA.6M	613.255	4.28616e-10
DPB96K	241.227	2.12428e-54	DQA.7V	417.35	3.40312e-40	DQA75I	552.731	2.72621e-31	DQB9F	598.227	1.52934e-11	C305A	651.755	2.54883e-13
DQB136Q	194.727	2.95538e-44	DPB65I	341.618	8.28772e-34	DRB71E	417.848	2.52567e-18	DQA160S	506.598	4.47941e-21	DPB205M	542.839	1.74351e-09
DQA130S	207.208	5.58613e-47	DQB220H	342.733	2.53389e-31	DPB76V	448.912	6.73669e-25	DPB170T	537.924	3.92517e-21	DQA175E	577.118	3.83713e-10
DPB96K	205.473	1.335e-46	DRB71K	354.103	3.4556e-34	DQA.6T	453.228	2.37098e-23	DRB13H	519.876	3.24578e-16	C77N	573.28	2.71464e-13
DRB51R	195.067	2.49132e-44	DPB55D	344.462	2.3507e-34	DQB140T	426.083	1.64816e-19	DRB78Y	474.228	3.95904e-12	C275E	518.084	3.53378e-11
DQA130S	207.208	5.58613e-47	DPB9H	346.538	3.72949e-32	DQA160A	445.572	2.48137e-23	DQA175E	509.792	1.11274e-15	DPB69E	564.705	1.25994e-13
DPB205V	237.396	1.4541e-53	DQB185T	422.942	2.98149e-42	DRB9K	531.519	2.00953e-25	DRB73A	560.192	8.56689e-08	B163T	586.419	3.03545e-07
DRB233T	216.386	5.55658e-49	DRB11V	320.322	2.08879e-24	DRB.16V	386.854	3.4437e-16	DPB9Y	455.32	1.29054e-16	DPB170I	517.25	3.55974e-15
DQB60N	194.426	3.43796e-44	DPB194R	366.492	2.61805e-39	DQA34E	455.583	3.77013e-21	DQB130R	524.388	1.08691e-16	C116F	568.249	3.52649e-11
DQB86G	195.143	2.3979e-44	DPB55D	334.704	3.32073e-32	DRB32H	441.17	5.82848e-25	DQB26L	494.038	3.56764e-13	DRB30H	515.825	3.04609e-06
DRB11L	210.109	1.30024e-47	DQA25F	364.369	2.03265e-35	DPB84G	497.525	8.35764e-31	DPB9H	560.904	1.70529e-15	B77S	605.201	2.82066e-11
DPB69K	252.846	6.2221e-57	DQB57A	418.171	7.76831e-38	DQB70T	529.435	5.18049e-26	DQA47K	570.179	1.73515e-10	C306A	609.734	3.19023e-10
DQA.6T	192.689	8.22892e-44	DPB55D	342.527	1.88082e-34	DRB32H	437.744	1.7069e-22	C94I	487.462	1.77495e-12	DQA.13T	533.243	1.322e-11
DQA129H	203.817	3.06796e-46	DPB9H	376.41	2.00869e-39	DQB.27A	506.632	3.66477e-30	DPB36A	570.216	1.53638e-15	DQB135D	607.424	1.06198e-09
DPB55A	273.144	2.34257e-61	DQA.13T	449.252	3.43016e-40	DQA40E	576.776	1.42682e-29	DQB71T	607.238	3.40404e-08	DQA69T	628.684	3.63928e-06
DQB220R	199.095	3.29025e-45	DPB84G	355.983	5.41659e-36	DQA187A	454.881	2.65812e-23	DQA47K	524.149	8.59635e-17	DPB35L	589.621	5.89523e-16
DRB57S	195.341	2.1701e-44	DQB57D	308.217	2.29744e-26	DPB178M	380.042	2.35203e-17	DPB9H	444.305	1.08875e-15	DPB76I	516.557	1.89322e-17
DRB31I	205.451	1.35028e-46	DQB140A	336.766	2.11243e-30	DPB76V	415.571	6.85532e-19	DPB84V	481.065	5.82913e-16	B32L	520.146	4.0652e-10
DRB.16V	215.484	8.74001e-49	DQB13A	334.59	9.92831e-28	DPB170T	397.804	1.85364e-15	DPB76I	460.028	3.0659e-15	DPB194Q	521.65	4.16248e-15
DQB9L	194.426	3.43796e-44	DPB205V	332.989	5.48865e-32	DQA560	463.164	3.75273e-30	DPB9H	533.395	5.27295e-17	C275E	569.583	1.79232e-09
DPB84D	250.217	2.32868e-56	DRB96E	417.18	3.40756e-38	DQB125A	530.151	2.19011e-26	B24A	569.888	2.90605e-10	DQA53Q	607.432	8.9338e-10
DQA40E	197.53	7.22459e-45	DRB.16A	351.381	2.49698e-35	DPB215I	486.356	3.34332e-31	C152E	534.073	4.92409e-12	DPB55D	565.669	1.89818e-08
DPB96K	220.618	6.63065e-50	DQA.13T	396.008	4.92165e-40	DQA.16M	543.049	7.68701e-34	DPB36A	596.556	2.57676e-13	DQA34E	642.934	9.74743e-12
DPB205V	173.47	1.29224e-39	DQB71A	295.12	2.75397e-28	DQB26G	400.065	1.25568e-24	DQB57S	446.823	8.03026e-12	C175G	472.657	3.72095e-07
DPB55A	211.495	6.48152e-48	DQA.6M	385.23	1.13105e-39	DQB185I	516.21	2.5016e-30	DPB9H	572.352	6.74122e-14	DQB203I	602.368	4.28555e-08
DPB76V	195.194	2.33687e-44	DQB30Y	339.42	3.17081e-33	DQA69T	436.252	7.54756e-23	DPB170T	499.142	2.18551e-15	DQA160S	548.592	2.03505e-12
DQB70T	194.426	3.43796e-44	DPB69K	314.728	5.43244e-28	DPB1780	394.825	3.56407e-19	DRB10E	456.309	4.46403e-15	C156W	524.361	1.5926e-16
DQB197S	201.413	1.02655e-45	DPB69K	365.853	1.21286e-37	DQB60N	484.617	1.17934e-27	DQA53G	530.4	1.32142e-11	DPB55E	561.413	2.56203e-08
DQB.27S	194.426	3.43796e-44	DPB194R	346.927	4.92291e-35	DRB133R	427.033	3.54959e-19	DRB47F	482.673	8.70071e-14	C156L	515.783	8.70936e-09
DQA107T	196.692	1.10106e-44	DQB70T	349.996	3.28644e-35	DPB55D	462.649	2.57105e-26	B.230	515.425	3.7378e-13	DQA.13T	557.714	7.87341e-11
DQA138T	194.916	2.68747e-44	DPB9Y	354.634	1.30413e-36	DQB70T	509.075	1.85451e-35	DPB205M	572.736	1.47833e-15	DQA.7V	607.951	2.95222e-09
DPB35Y	170.746	5.08371e-39	DRB74E	309.314	5.47599e-32	DQA.7V	412.511	3.03455e-24	DQA69T	497.806	2.56966e-20	DPB84D	573.98	2.59691e-18
DQB70E	194.55	3.22947e-44	DPB170I	330.477	2.07059e-31	DQB57D	410.354	3.98532e-19	DRB71E	462.307	5.68443e-13	DPB55E	507.104	2.18491e-11
DQA160A	204.454	2.22827e-46	DPB55A	346.52	9.40765e-33	DQA50L	451.584	1.18221e-24	DQB60N	512.47	6.0486e-15	DPB205M	554.64	8.36728e-11
DRB74L	201.741	8.70991e-46	DPB55A	351.873	1.62176e-34	DQA.6T	440.349	5.14563e-21	DPB9H	519.81	4.91838e-19	DQA129H	576.802	4.3768e-14
DRB.24F	195.065	2.49352e-44	DQB197S	347.433	5.26473e-35	DPB205M	438.251	1.5756e-21	DPB57D	494.199	7.43953e-14	DQA160D	559.4	6.76473e-16
DQB.10S	194.426	3.43796e-44	DQA175E	343.004	3.54635e-34	DPB96R	449.114	6.97495e-25	DRB38V	483.513	4.48953e-09	B.11S	517.506	5.53107e-09
DRB11P	201.72	8.79978e-46	DQB185T	345.361	4.25732e-33	DPB76M	430.407	2.91494e-20	DPB178M	492.227	3.76344e-15	DRB70Q	542.604	1.26838e-12
DPB69K	229.992	5.9841e-52	DRB57A	408.998	7.98822e-41	DRB13H	491.74	9.34913e-20	DRB233T	531.615	2.70789e-10	DRB58D	565.31	6.44634e-09
DRB26F	206.542	7.80338e-47	DQA34E	320.336	1.44622e-26	DPB96R	415.618	1.65071e-22	DPB205M	497.32	1.5821e-19	DQA.6T	546.582	2.23965e-12
DRB58F	194.271	3.71624e-44	DPB76V	343.883	2.10755e-34	DQA69T	444.767	9.75194e-24	DRB67I	528.681	5.16888e-20	B.23R	568.663	2.5631e-10
DRB26Y	195.021	2.54909e-44	DQA53Q	304.973	1.00394e-25	DPB55D	397.506	6.62124e-22	DQA215F	466.84	8.31236e-17	DPB9Y	515.722	2.7179e-12
DQA50L	198.516	4.40286e-45	DQB185I	356.231	3.57235e-36	DPB33E	442.821	1.33474e-20	DPB35F	522.571	4.2495e-19	DPB205M	567.923	1.64636e-11
DQB.27S	194.426	3.43796e-44	DQA129Q	300.841	5.98077e-25	DPB57D	400.507	1.80373e-23	DPB76I	528.721	1.00764e-29	DQA.13T	590.395	4.05395e-15
DPB76M	238.249	9.47497e-54	DQB9L	395.679	4.12189e-36	DQB224Q	494.976	2.173e-23	A56G	534.034	4.11444e-10	C177E	567.26	8.2064e-09
DRB.16A	203.794	3.10466e-46	DQA138I	324.165	5.24721e-28	DPB76M	414.423	2.08963e-21	DQA.7V	475.942	4.38598e-15	DRB71R	503.748	1.34094e-07
DPB65I	238.271	9.37042e-54	DQB57S	393.967	9.86413e-36	DQA47K	487.202	4.64474e-22	DQB9F	548.656	4.53092e-15	DPB35L	587.761	4.01678e-10
DRB38L	196.212	1.40088e-44	DPB96R	354.44	2.75982e-36	DQB87F	481.204	2.09302e-29	DRB26L	535.347	1.86325e-13	DRB60S	561.057	3.96809e-07
DRB149Q	217.536	3.11855e-49	DPB9Y	347.766	3.64898e-30	DQB26L	443.516	1.30366e-22	DPB205V	501.086	3.26042e-14	C163T	554.233	3.09584e-13
DQA160S	192.689	8.22892e-44	DQB26G	321.243	8.49153e-30	DPB84D	406.962	2.07461e-20	DPB194Q	448.409	1.21069e-10	DQA69T	486.407	7.08151e-10
DQB60N	194.426	3.43796e-44	DPB170I	343.815	2.35745e-34	DQA.7M	432.461	4.72219e-21	DPB76M	519.559	1.03282e-20	DRB58A	580.812	5.01786e-15
DQB136E	194.426	3.43796e-44	DPB1940	306.566	3.32927e-26	DQA.13T	396.397	2.59343e-21	DQA138I	459.826	1.66252e-15	DPB170T	511.311	7.21461e-13
DPB69E	222.345	2.78587e-50	DQA34E	396.324	1.00028e-39	DRB71K	467.943	2.61001e-17	DQA11C	526.592	1.8848e-14	DQA160D	559.122	1.17351e-08
DPB35F	272.953	2.57858e-61	DRB74E	414.152	1.45511e-32	DQA69T	503.608	3.13524e-21	DQB197S	573.639	5.8385e-17	C275E	613.93	2.18811e-10
DQB86G	192.216	1.0438e-43	DPB205M	365.242	1.6157e-39	DQA69L	479.079	1.41452e-26	DRB58S	515.317	1.74645e-09	DQB136Q	558.998	3.86413e-11
DQB860	194.426	3.43796e-44	DPB69E	303.376	1.66401e-25	DQA53G	385.987	9.99283e-20	B.11W	454.878	1.04023e-16	DQB185I	506.945	5.3659e-13
DRB77T	210.15	1.27369e-47	DQB26L	348.14	7.32726e-32	DPB11G	436.277	6.10522e-21	DPB9H	496.775	7.36618e-15	DPB170I	541.109	2.76925e-11
DPB96K	229.511	7.62157e-52	DQB224Q	372.877	4.88779e-33	DQA25Y	512.215	3.71634e-32	DQA.16M	552.864	1.82162e-10	DPB11G	587.997	3.07857e-09
DQA207M	192.689	8.22892e-44	DQB74S	323.623	2.56002e-30	DPB65I	388.114	9.69744e-16	DPB55E	454.873	3.06902e-16	DPB205M	541.944	1.0467e-20
DQA.6T	192.689	8.22892e-44	DRB58S	309.871	2.61978e-27	DPB9Y	398.405	4.99542e-21	DQA207M	455.007	5.3364e-14	DPB55A	507.498	4.32302e-13
DQB71T	196.473	1.22897e-44	DQB57S	325.107	8.15332e-30	DQA187A	410.078	3.02842e-20	DPB69K	486.054	2.87068e-18	DPB33E	526.671	1.8527e-10
DPB65I	268.837	2.0343e-60	DRB.24F	423.929	1.3365e-35	DQA207V	519.731	1.27012e-22	B30D	572.127	4.53661e-13	C152A	607.76	2.38183e-09
DPB215I	269.693	1.32363e-60	DRB57A	448.465	8.98799e-41	DQB140A	532.788	4.20215e-20	C73A	594.886	3.26658e-15	DRB9K	639.508	2.39032e-11
DPB35F	198.228	5.08655e-45	DQB37Y	347.843	2.10485e-34	DQA129Q	470.194	1.93382e-28	DPB57A	536.397	4.06892e-16	DRB11P	582.279	1.25591e-11
DQB136E	194.426	3.43796e-44	DQA138I	302.873	2.14519e-25	DQB197S	401.576	2.93319e-23	DPB96K	484.39	9.01657e-20	C66K	526.394	9.10821e-11
DPB76M	206.851	6.68158e-47	DQA53Q	387.625	3.28465e-41	DQB125G	486.749	2.37145e-23	DQA50L	549.64	2.18456e-15	DPB178M	599.976	1.29539e-12
DPB205V	206.588	7.62757e-47	DRB58D	374.04	2.665e-38	DQA1K	466.334	7.47113e-22	DQB.18V	546.808	2.94512e-19	B12M	589.301	7.09366e-11
DPB11G	241.621	1.74324e-54	DQB136E	415.06	1.31207e-39	DRB71R	523.198	2.50768e-25	DQA138I	572.149	2.62418e-12	C00	620.139	4.28294e-12
DQB.27S	194.426	3.43796e-44	DPB9H	345.492	1.01392e-34	DQB185I	459.618	1.22259e-26	DPB205V	529.389	6.66009e-17	DQA34E	582.302	3.48663e-13
DQB220R	198.322	4.85284e-45	DPB9Y	352.114	2.57127e-35	DRB47F	446.749	2.29005e-22	DQA.13T	515.857	9.31871e-17	DQB74S	562.644	7.91647e-12
DPB96R	221.487	4.2861e-50	DQA53Q	359.209	8.38292e-32	DRB71E	451.557	7.26828e-22	DQA.13T	516.092	9.48479e-16	C116S	559.274	4.98799e-11
DQA160D	192.346	9.7774e-44	DQB140T	318.53	2.8026e-29	DPB35L	416.689	3.86205e-23	B156L	472.526	7.87224e-14	DQA187A	521.657	2.3937e-12
DRB38V	202.399	6.25509e-46	DPB65I	343.207	1.77228e-32	DQA47K	430.451	9.59383e-21	DQB2030	510.298	4.04535e-19	DPB8L	553.666	4.53616e-11
DQA.6T	192.689	8.22892e-44	DPB69K	280.45	7.38742e-21	DRB58Y	336.378	7.51899e-14	DRB11P	399.895	1.58969e-15	DRB51R	441.746	9.85056e-11
DPB96K	209.488	1.77611e-47	DQB.10S	376.284	3.70709e-38	DRB70D	479.116	3.64934e-24	DQA130S	535.581	5.7206e-14	B116D	577.746	8.38913e-11
DRB11G	195.065	2.49352e-44	DPB55A	331.265	1.80457e-31	DRB71K	406.755	3.67147e-18	DQA.16L	454.26	5.48565e-12	B80N	492.612	5.90775e-10
DPB8L	239.383	5.36039e-54	DQB45E	409.129	8.40938e-39	DQA175E	546.654	9.25352e-32	DQB126Q	583.712	1.14717e-09	C.170	620.87	1.08931e-09
DQB9L	194.426	3.43796e-44	DPB76V	287.173	5.94247e-22	DPB35F	369.145	1.38044e-19	DRB13G	426.604	3.44986e-14	DQB60N	492.991	3.70643e-16
DRB77T	194.797	2.85366e-44	DQB71T	319.074	7.32554e-29	DPB76V	414.489	1.54368e-22	DPB35L	476.277	3.82575e-15	DQA215F	523.388	6.70608e-12
DPB65I	194.937	2.65976e-44	DQB.27A	368.458	1.25919e-39	DQB86G	491.456	1.39573e-28	C9Y	562.167	4.13637e-17	DPB69E	595.564	7.51279e-09
DQB70R	199.32	2.9399e-45	DQB136E	339.871	2.01667e-32	DPB96R	414.024	7.22714e-18	DPB36A	488.385	6.5066e-18	DQA34E	536.601	3.81803e-12
DPB178L	215.294	9.61616e-49	DQB9L	389.448	9.16042e-40	DQA52R	485.254	1.2668e-22	DQA560	545.7	7.56513e-15	C2750	583.355	8.43983e-10
DRB26Y	195.353	2.15766e-44	DQB66D	336.434	1.54488e-32	DPB170I	444.878	2.14797e-25	DPB205M	505.415	7.22102e-15	C219W	555.721	1.31537e-12
DQA160S	192.689	8.22892e-44	DQB185T	314.254	2.87418e-28	DPB65I	388.098	8.4552e-18	DQA207M	456.792	1.14967e-16	DPB76I	506.064	2.22871e-12
DPB11G	219.466	1.18272e-49	DQB26L	418.995	2.6459e-45	DQA.7M	532.212	1.93459e-26	C95L	587.559	1.01008e-13	DQA130S	630.753	4.95735e-11
DQB860	194.426	3.43796e-44	DPB11G	359.299	9.75013e-38	DQB185T	486.306	1.85138e-29	DQA69T	531.751	1.56989e-11	B113H	579.318	5.31483e-12
DPB84D	232.403	1.78365e-52	DRB.16V	387.432	1.37971e-35	DQA.6T	481.557	2.9628e-22	DQB220H	557.522	2.88726e-18	DPB69K	597.555	2.49756e-10
DRB38L	211.111	7.8605e-48	DQB.18A	345.705	4.0505e-31	DPB178M	414.701	9.86661e-17	DPB69E	469.897	1.09079e-13	DPB960	527.317	3.52119e-14
DPB205V	213.653	2.19187e-48	DQB86G	380.133	4.34546e-38	DQA41K	473.584	4.16376e-22	DRB149Q	544.013	4.7712e-17	C152A	583.437	3.41105e-10
DQB9L	194.426	3.43796e-44	DPB76M	356.836	3.36617e-37	DRB58N	459.345	4.29362e-24	C152A	500.817	1.19587e-10	DPB205M	538.468	8.45994e-10
DQA53G	164.267	1.32283e-37	DPB205M	292.479	1.00876e-29	DRB71K	406.352	1.38878e-26	DQB860	469.435	1.98212e-15	DQB2030	511.82	7.49543e-11
DPB205V	238.762	7.3232e-54	DQA34E	411.662	1.72053e-39	DRB11G	505.756	3.01018e-22	DQA1E	570.866	7.08202e-16	C152A	617.482	8.63261e-12
DRB10E	195.065	2.49352e-44	DPB65I	319.161	8.02849e-29	DQB57D	431.835	2.54226e-26	DPB55D	479.477	5.117e-12	DQA25F	512.03	1.15983e-08
DQB220H	191.316	1.64122e-43	DPB205M	326.866	2.50223e-31	DQB38A	438.357	4.61948e-26	C163T	511.298	1.33554e-17	DPB170I	548.317	1.17001e-09
DQA207V	194.916	2.68747e-44	DQB9L	351.177	7.4239e-36	DPB8L	454.953	2.26504e-24	DQB130R	492.409	9.35336e-10	B95L	538.832	9.52747e-12
DPB215I	181.427	2.36509e-41	DQB30H	322.691	1.40846e-32	DRB51R	424.731	5.44178e-24	DPB69E	498.839	7.39799e-18	DRB58Y	545.968	6.64484e-12
DQB185I	158.281	2.68701e-36	DQA129Q	315.797	3.9485e-36	DPB8L	399.005	7.38495e-20	DQB30Y	464.2	6.78389e-16	DPB9H	510.393	1.0718e-11
DQB57V	195.192	2.33942e-44	DPB57E	353.536	2.6026e-36	DQA47K	447.716	2.88147e-22	DQA175E	510.369	2.46506e-15	C24A	563.375	3.32634e-13
DQA.7V	207.429	4.99838e-47	DQB140T	363.58	7.84472e-36	DPB35Y	448.604	2.94776e-20	DPB9H	513.609	7.4704e-16	DQA.13T	564.049	1.22855e-12
DQB70T	194.426	3.43796e-44	DPB65I	333.343	4.59255e-32	DRB13S	444.211	6.32268e-26	DQA160A	480.769	1.48258e-09	DPB76V	510.832	4.18221e-08
DPB57E	280.248	6.63205e-63	DQA41K	435.719	1.10454e-35	DQB38A	519.825	4.68896e-20	DRB31I	559.562	2.90645e-10	B1940	596.72	1.08895e-09
DPB8L	209.08	2.18086e-47	DQB60N	365.322	7.49335e-36	DQA47K	462.59	6.05461e-23	C99Y	531.281	1.15179e-16	DQB70E	584.2	3.47631e-13
DQB203I	184.017	6.43209e-42	DQA560	290.907	4.70703e-25	DPB1780	390.032	2.37024e-23	DPB69K	482.391	7.22899e-22	DQA207V	551.301	1.03042e-16
DPB194R	262.551	4.76949e-59	DQB197S	405.737	5.35195e-33	DQA75I	466.314	7.0769e-15	C16G	513.008	8.2971e-12	DQA138I	552.496	3.3016e-10
DQB60N	194.426	3.43796e-44	DQA25F	351.373	5.25713e-36	DPB76M	442.38	1.43163e-21	DPB33E	489.801	5.72584e-12	DPB205M	527.535	8.1084e-10
DPB96R	208.118	3.5349e-47	DQA53G	384.917	2.42399e-40	DQB45E	511.444	2.35757e-29	DQB89G	547.529	1.88918e-09	C77N	570.545	1.6065e-06
DPB76V	206.564	7.71902e-47	DRB11G	374.958	1.65924e-38	DRB70R	481.799	4.8226e-25	DQA69T	531.424	1.86176e-12	C163T	583.028	6.79147e-13
DQA207V	207.208	5.58613e-47	DRB9W	331.044	9.14975e-29	DPB76M	412.817	1.5261e-19	DQA50L	455.522	6.36468e-11	DPB194R	499.363	3.56227e-11
DQA69T	207.208	5.58613e-47	DQA160D	316.804	1.20107e-25	DPB170I	415.39	3.11303e-23	DRB74L	497.289	1.4318e-19	DPB65I	564.705	2.19891e-16
DQB.18A	194.457	3.3852e-44	DPB205M	304.852	8.02577e-26	DQA160S	404.178	2.14184e-23	DQA50L	471.256	2.61002e-16	DPB76V	522.329	8.90228e-13
DQA53Q	207.429	4.99838e-47	DQB87Y	353.861	1.04426e-33	DPB76V	488.819	3.37351e-31	C156W	540.068	8.1343e-13	DQA50L	571.74	1.82508e-08
DQB197S	213.308	2.60722e-48	DQA207M	335.93	1.68729e-28	DPB55D	447.304	4.90032e-26	DPB194R	502.439	1.12531e-13	DQA.160	552.26	1.68417e-12
DQA.7V	206.924	6.44275e-47	DQB224Q	344.689	8.2009e-32	DPB205V	419.596	4.93371e-18	DQA69L	471.486	5.87052e-13	DPB76I	522.15	1.09619e-12
DQA.160	192.689	8.22892e-44	DRB13H	328.105	2.67813e-31	DPB8L	401.933	8.52379e-18	DPB194Q	463.784	3.7047e-15	DQB77R	520.65	4.66416e-14
DRB57V	198.213	5.12721e-45	DPB55D	362.405	1.37352e-37	DQB9F	477.766	6.55994e-27	DPB69E	519.1	1.2828e-10	DQA34E	569.464	1.27704e-12
DRB51T	194.336	3.5968e-44	DPB69K	312.542	1.56274e-27	DQA138I	412.552	1.51652e-23	DQA11C	488.821	2.47589e-18	C2750	521.665	9.98199e-09
DPB96R	233.278	1.14941e-52	DRB57A	388.802	1.07556e-35	DQA560	508.797	6.34171e-28	DPB205M	566.387	3.22918e-14	DQB26L	602.723	1.66115e-09
DPB76M	199.993	2.09617e-45	DQB185I	389.858	3.40198e-43	DQA26S	489.217	2.10615e-23	DRB70R	545.801	5.38571e-14	DPB84D	597.513	6.4266e-13
DQB57V	167.332	2.83034e-38	DRB86G	272.804	9.62825e-25	DPB96R	392.219	8.49461e-28	DPB84V	458.864	3.25103e-16	C261V	504.893	1.16531e-11
DPB65I	253.468	4.55519e-57	DQB203V	412.858	1.53727e-36	DQA.7V	519.215	6.1597e-25	DQA11C	558.195	4.28227e-10	C9D	596.98	4.72966e-10
DRB96E	194.851	2.77602e-44	DPB9H	338.98	3.33063e-33	DQA160D	440.491	7.10644e-24	DRB70D	509.922	7.91255e-17	B3250	560.636	1.0686e-12
DQA207V	207.208	5.58613e-47	DPB960	349.086	1.0339e-32	DQB45G	468.987	6.64814e-28	C116S	514.639	1.41302e-11	DQA11C	552.827	6.42305e-10
DPB11G	263.616	2.79415e-59	DQB56L	419.191	1.0487e-35	DQA.16M	527.663	2.11801e-25	A207S	568.683	1.5067e-10	DQA47K	605.617	1.22178e-09
DQA187A	194.277	3.70521e-44	DPB69E	337.378	5.58588e-33	DQA53Q	468.973	1.83507e-30	DPB9Y	531.226	3.01975e-15	DQA.16M	597.794	3.38125e-16
DQB57S	194.426	3.43796e-44	DPB205M	346.265	6.87149e-35	DQA1K	442.939	8.17178e-23	DQB55P	513.17	5.27518e-17	C95I	555.099	9.46684e-11
DPB69K	213.93	1.9074e-48	DQB203V	391.539	1.61237e-40	DQB136Q	460.149	1.20033e-16	DQA69T	505.127	1.9919e-11	DQA160A	560.348	1.07723e-13
DQA75I	207.15	5.75053e-47	DQB140A	314.135	4.48415e-25	DPB205V	432.68	1.31764e-27	DQA187A	484.7	5.49271e-13	DPB76M	526.595	9.63494e-11
DQB167R	213.511	2.35403e-48	DPB96K	348.111	4.03991e-31	DQB136E	456.298	2.44571e-25	DQA.6T	507.917	6.73934e-13	DPB205M	544.244	1.66829e-09
DRB.16V	210.08	1.3198e-47	DPB170T	339.87	4.55517e-30	DRB58F	438.083	3.75648e-23	DPB76V	524.19	1.70468e-20	DQB45E	605.018	2.46169e-19
DQA207V	207.208	5.58613e-47	DPB205V	354.359	7.27233e-34	DQB55P	469.83	6.20467e-27	DRB10Q	514.082	2.88739e-11	B3250	540.347	2.97656e-07
DQA160S	192.689	8.22892e-44	DPB215I	330.255	9.07119e-32	DQA207M	420.192	2.45829e-21	DQB9F	487.517	2.30173e-16	C73A	539.266	6.30896e-13
DRB51R	174.373	8.20673e-40	DQB45E	306.241	1.59926e-30	DPB205M	390.09	5.33901e-20	DPB84D	498.938	1.75229e-25	DQA53G	545.524	8.76942e-12
DQB220R	198.406	4.65342e-45	DQA75I	327.609	6.12002e-30	DPB1780	409.924	1.1608e-19	DPB57A	477.42	2.11079e-16	C.170	541.82	1.01568e-15
DPB8L	199.773	2.34122e-45	DQB.27S	385.341	2.94936e-42	DQA160S	483.623	3.62902e-23	DRB26F	549.4	5.04858e-16	DPB65I	580.434	2.53562e-08
DRB26L	216.716	4.7076e-49	DPB178L	373.142	6.83177e-36	DRB.250	447.69	5.9175e-18	DQA.13T	502.81	1.1342e-13	B98T	544.869	8.85242e-11
DQA41K	192.689	8.22892e-44	DRB70D	322.849	3.78183e-30	DPB194R	390.184	2.29043e-16	DQA207V	441.844	6.599e-13	C99Y	484.283	7.29176e-11
DQB136E	194.426	3.43796e-44	DPB205V	351.302	5.44662e-36	DQA25F	431.595	3.22906e-19	DQA560	502.307	4.13351e-17	DPB84V	547.781	1.54695e-11
DRB10E	195.065	2.49352e-44	DQA11Y	329.741	3.88656e-31	DPB96R	424.596	2.04833e-22	DPB194Q	499.071	6.14286e-18	B178K	528.265	6.54761e-08
DRB10E	195.065	2.49352e-44	DPB170I	318.242	1.27564e-28	DQA138I	418.038	1.68916e-23	DQB26L	499.229	2.04919e-19	DPB205M	566.224	2.72137e-16
DQB.18A	149.447	2.28952e-34	DQB197S	272.821	1.15525e-28	DPB84G	371.291	3.29916e-23	DPB76I	455.429	4.61379e-20	DQA25F	500.267	2.14026e-11
DRB74E	198.261	5.00494e-45	DQA175E	317.508	9.24382e-28	DPB11G	427.262	1.10943e-25	DQB125G	484.141	4.6349e-14	DPB76V	535.843	6.46117e-13
DRB71A	208.22	3.35867e-47	DQB30Y	349.299	1.54609e-32	DPB9H	463.715	1.05663e-26	DPB178L	517.388	2.36778e-13	DPB65I	576.007	1.914e-14
DQA69T	207.208	5.58613e-47	DQA26S	362.337	1.31219e-35	DPB69E	495.994	6.49112e-31	DPB35L	574.467	8.11232e-19	C.18R	610.297	2.15321e-09
DRB.250	203.457	3.67724e-46	DQB197S	312.68	1.44984e-25	DPB84G	389.98	1.46895e-18	DQA138I	441.864	5.88663e-13	DQA34E	486.612	2.24083e-11
DQA129H	203.817	3.06796e-46	DQB.10S	356.73	4.00258e-35	DPB170T	448.071	1.20906e-21	DPB76M	500.117	5.42174e-13	DQA175E	542.554	7.30209e-11
DQA.13A	204.304	2.40285e-46	DQA69T	316.872	2.68232e-26	DPB76V	419.659	3.7327e-24	DQB9F	482.021	2.85725e-15	DPB9H	535.697	2.36473e-13
DQB220H	192.966	7.16134e-44	DPB55E	335.158	8.82911e-33	DPB65I	414.482	5.27121e-19	DRB32H	475.078	7.00768e-15	DPB8L	525.928	9.97103e-13
DRB96E	194.975	2.60857e-44	DQB87Y	323.057	1.07715e-29	DPB76M	417.976	1.98307e-22	DPB84G	462.477	2.54266e-11	DQA50L	504.281	1.00892e-10
DPB69K	269.251	1.65295e-60	DQB89G	437.86	1.4891e-38	DQB70T	555.665	1.91311e-27	DQA47K	597.776	8.62416e-11	C163T	642.42	2.3632e-11
DQA207M	192.689	8.22892e-44	DQA129H	348.942	7.45487e-36	DPB65I	473.371	6.78501e-29	DPB170T	516.151	6.12551e-11	B116S	553.642	9.18481e-10
DPB69K	257.612	5.68847e-58	DQA130S	420.809	2.26538e-37	DQB.27S	548.501	1.31121e-29	A.15V	578.23	4.96953e-08	DQA129H	612.394	5.06474e-09
DQA.13T	194.916	2.68747e-44	DQB56L	351.177	7.4239e-36	DPB84D	438.572	8.88575e-21	DPB57A	507.744	9.02439e-17	DQB126Q	545.911	6.49393e-10
DRB.25K	206.912	6.48089e-47	DQB57A	366.091	1.71036e-36	DPB55D	447.267	2.06401e-19	DQA175E	502.138	1.28732e-13	DPB57A	542.937	1.68685e-10
DQA53Q	206.778	6.9313e-47	DQA129H	359.448	4.52257e-35	DPB170T	496.72	1.0515e-31	DQB30H	536.038	3.60148e-10	C.150	581.818	1.3227e-11
DPB194R	262.62	4.60684e-59	DQA130S	428.425	6.10086e-38	DQB.10S	558.922	3.19033e-30	DRB13F	593.905	3.32575e-09	C116S	627.894	5.54434e-09
DQA53G	204.066	2.70767e-46	DPB170I	363.675	1.37744e-36	DQB136Q	454.674	1.43769e-21	DQA215F	502.502	4.65098e-12	DPB65I	534.441	1.5909e-08
DRB9K	195.065	2.49352e-44	DQA160A	288.242	4.78129e-22	DPB194Q	358.49	5.22964e-17	DRB28D	409.03	1.16761e-12	DQA34E	457.384	3.55978e-12
DPB8L	226.37	3.68915e-51	DQB66D	387.727	5.71751e-37	DRB74L	506.34	1.27302e-27	C219R	544.294	7.2452e-10	DRB13G	580.475	1.79803e-09
DQA130S	207.208	5.58613e-47	DQA.13T	362.064	1.50548e-35	DPB36A	451.647	2.93989e-21	DPB11G	520.941	8.48368e-17	C156R	558.759	7.76584e-10
DQB136E	194.426	3.43796e-44	DPB9H	356.608	3.77482e-37	DQA.13A	460.981	1.67638e-24	DPB57A	537.584	2.08961e-18	DQA207M	591.797	1.79926e-13
DQB60N	194.426	3.43796e-44	DPB65I	337.863	4.71789e-33	DQB71T	444.409	5.59653e-25	DQA34E	503.913	1.22076e-14	DPB205V	544.417	1.96166e-10
DQB86G	194.55	3.22947e-44	DQB77R	327.939	7.43551e-31	DPB9H	449.27	3.23383e-28	DPB76I	506.246	4.41166e-14	DQA207M	546.92	1.79809e-10
DRB78V	210.819	9.10362e-48	DPB11G	359.506	3.35766e-34	DQA560	472.965	1.7112e-26	C21H	532.206	1.39514e-14	DQA1K	585.342	3.1122e-13
DRB31I	221.343	4.60794e-50	DPB55D	323.954	4.07741e-24	DRB74A	401.018	1.65548e-18	DQB.18A	459.374	2.18702e-14	C156L	499.518	2.35928e-10
DQB70E	194.457	3.3852e-44	DPB9H	351.482	5.05265e-36	DQA1K	441.152	2.815e-21	DQB70G	517.15	2.83947e-18	DPB35F	573.524	5.99087e-14
DQB57S	194.426	3.43796e-44	DQA207M	302.873	2.14519e-25	DPB55A	391.262	5.37704e-21	DPB215I	456.481	6.70301e-16	DQA215F	521.67	6.80473e-16
DRB71A	203.744	3.18296e-46	DQB.27A	331.186	1.48723e-29	DPB96K	425.23	3.08505e-22	DPB57A	518.85	3.82229e-22	DRB58N	566.423	5.30175e-12
DQA11C	204.223	2.50246e-46	DQA.16M	325.529	3.27462e-28	DPB178L	407.008	1.77137e-19	DQB125A	475.021	1.62395e-16	DPB9Y	521.392	9.78883e-12
DQA207V	207.208	5.58613e-47	DPB76V	391.61	5.29955e-42	DQA160A	514.266	1.65863e-28	DPB55D	560.279	1.17495e-11	DPB35F	609.584	2.19009e-12
DPB76M	231.085	3.45764e-52	DQB70T	391.191	1.07239e-36	DRB71K	461.427	5.26346e-17	DQB185I	522.541	5.38546e-15	DQB86A	582.046	1.21977e-14
DPB9Y	223.843	1.31285e-50	DRB96E	404.991	2.72032e-41	DQA69L	509.421	1.62866e-24	C163E	549.243	2.78185e-10	DRB57V	582.356	8.69722e-09
DRB73G	199.44	2.76729e-45	DPB35F	313.782	1.09661e-26	DQA41K	423.192	1.31972e-25	DPB96R	494.772	2.66198e-17	C95L	555.324	7.16798e-15
DQA34E	185.723	2.72823e-42	DQA25F	302.929	2.58839e-27	DPB57E	385.934	8.18338e-20	DPB69E	453.797	1.75292e-16	DQB70E	523.047	8.67134e-17
DQB60N	194.426	3.43796e-44	DPB65I	288.051	3.8128e-22	DQB26L	368.002	3.83772e-19	DRB70Q	437.564	7.40842e-17	C116S	502.195	9.03069e-16
DQA138I	192.689	8.22892e-44	DQA50L	322.389	4.76787e-30	DPB170T	417.017	2.29666e-22	DPB205M	502.995	1.8199e-20	DQB203I	546.002	5.45493e-11
DRB.25K	214.313	1.57376e-48	DQB86A	340.724	2.49905e-29	DPB76I	432.304	1.072e-21	DPB57E	510.931	7.50274e-19	DQA187A	578.784	1.76156e-16
DPB65I	267.468	4.0426e-60	DQB57S	431.416	1.55309e-37	DQA53G	511.927	2.89052e-19	DQB66D	575.145	1.85105e-15	C95L	609.659	4.2305e-09
DQA.6M	192.893	7.42733e-44	DPB8L	348.476	1.04454e-35	DQA560	453.901	9.85512e-25	C285V	518.968	7.23668e-16	DQA160D	564.003	1.9364e-11
DQA207M	192.689	8.22892e-44	DQB30H	339.333	9.38722e-34	DPB205M	429.167	2.59035e-21	DQA11Y	485.103	7.48643e-14	C116Y	526.782	1.07567e-10
DRB74L	184.684	4.59954e-42	DQA.6T	305.021	5.33739e-28	DPB84G	401.274	1.01131e-22	DQA.13T	451.465	1.39481e-12	DPB65I	500.394	2.65379e-12
DPB69K	204.545	2.12889e-46	DQA138T	359.027	1.81661e-35	DQB197S	473.263	1.15707e-26	DPB9H	526.343	3.20197e-13	DQA160D	567.146	1.68388e-10
DRB71A	194.096	4.05703e-44	DPB57D	339.663	1.61492e-33	DQA1E	455.521	5.10467e-27	DQB197S	519.662	1.15855e-15	C156L	567.955	3.67045e-12
DPB76M	271.982	4.19808e-61	DQB136E	434.409	3.33653e-37	DQB55P	546.323	3.73099e-26	DQA138I	585.992	3.0096e-10	B113H	623.739	8.05303e-10
DPB178L	229.308	8.43873e-52	DQA50L	405.385	3.4841e-40	DPB57A	493.07	7.67424e-21	DQB26G	573.169	3.56139e-19	DQB182S	623.94	1.03803e-12
DQA129H	204.505	2.17125e-46	DPB36A	324.425	6.58722e-28	DRB58Y	417.16	5.97806e-22	DPB170I	458.708	1.15012e-10	C21H	499.836	1.42638e-10
DRB96H	221.553	4.14618e-50	DPB55D	355.58	5.39017e-31	DQB57D	448.997	4.23534e-22	DPB76V	494.207	1.77028e-11	DPB205M	550.414	6.52061e-14
DQB9L	194.426	3.43796e-44	DPB55A	329.515	3.15699e-31	DQA.13T	443.077	1.62532e-26	DQA.7M	507.457	1.02608e-15	DPB57A	538.535	2.47789e-08
DPB69K	246.382	1.59698e-55	DQA41K	399.118	4.37514e-35	DQB9Y	511.745	2.60362e-26	C306V	553.462	1.0552e-10	DQA47K	592.632	3.88392e-10
DRB.24F	195.065	2.49352e-44	DPB9H	357.501	3.32253e-37	DQA25F	491.51	5.43872e-31	DQB87Y	527.156	2.3658e-09	B69T	558.238	2.47341e-08
DQA41K	192.689	8.22892e-44	DQA138I	301.449	1.83234e-25	DQB26G	394.639	4.74913e-22	DPB65I	476.13	1.7608e-19	DPB194R	528.26	5.19449e-13
DQB56L	194.426	3.43796e-44	DPB96K	343.875	2.28769e-34	DRB71R	444.072	1.37942e-23	DPB35Y	522.597	7.89866e-19	DRB26Y	562.394	2.81872e-10
DPB55E	224.127	1.13815e-50	DQB224Q	360.397	1.74205e-31	DQB71T	434.897	6.06238e-18	DQA130S	500.019	7.03956e-16	C116Y	530.664	3.09926e-08
DPB205V	252.901	6.05273e-57	DQB.18V	419.272	4.58988e-38	DQA215F	542.583	1.19224e-28	C163T	593.051	1.21159e-12	DQB1160	640.251	6.40864e-12
DRB233T	217.284	3.53844e-49	DQA.13A	322.278	1.22538e-24	DPB65I	396.55	6.80626e-18	DQB136E	456.12	1.17968e-14	DPB69E	505.074	2.62057e-12
DQB136E	194.426	3.43796e-44	DQB38A	321.296	1.98337e-29	DPB96R	397.837	2.15715e-18	C219R	462.355	9.56667e-16	DPB76I	525.107	2.34359e-15
DQB56L	194.426	3.43796e-44	DQB55P	334.679	2.34322e-32	DPB33E	457.143	1.82753e-28	DQA.6T	497.175	2.49838e-10	DPB96R	536.743	3.1682e-10
DQA207M	192.689	8.22892e-44	DPB36A	347.811	1.31713e-35	DQB26G	453.644	8.02313e-25	DQA.6M	519.751	4.26973e-16	B76E	566.526	7.96062e-12
DQB.10S	194.426	3.43796e-44	DPB215I	339.094	2.53852e-33	DQA138T	432.915	3.4543e-22	DRB38V	493.731	6.26637e-15	A95I	527.683	5.64668e-09
DQB70T	194.426	3.43796e-44	DPB96R	349.205	1.56478e-35	DQA129Q	453.069	2.16733e-24	DRB58A	504.738	6.56806e-13	DPB76I	546.895	8.42554e-11
DPB69E	243.059	8.46733e-55	DRB74R	398.058	1.40119e-35	DQA129H	506.648	1.9951e-25	DRB78Y	539.843	8.33614e-09	C114V	569.822	4.3686e-08
DQA47K	192.689	8.22892e-44	DQB182S	323.68	2.48818e-30	DPB84D	439.22	5.99314e-27	C295A	491.593	4.59044e-13	DQA1K	531.692	2.41372e-10
DQB56L	194.426	3.43796e-44	DPB84D	302.449	2.65622e-25	DQA138T	393.566	1.35442e-21	DRB57A	451.576	2.60803e-14	B114N	499.935	3.54986e-12
DQA138I	192.689	8.22892e-44	DPB9H	361.432	1.39232e-38	DQB30Y	464.859	2.70186e-24	DRB96E	514.903	1.50301e-12	DPB170I	562.14	6.29131e-12
DQB53L	217.658	2.93304e-49	DQA.6T	340.329	1.64571e-28	DPB9H	424.56	4.40223e-20	DRB.1S	472.404	4.616e-12	B171H	524.813	4.50669e-13
DPB65I	253.601	4.25913e-57	DQA207M	422.648	1.19508e-38	DQB13A	523.362	1.06261e-23	B77S	566.91	4.1369e-11	DQA1E	619.072	5.11191e-13
DQA207M	192.689	8.22892e-44	DPB215I	303.891	5.34526e-26	DQA.6M	406.142	4.89148e-24	DQA138I	483.948	1.13673e-18	DPB76I	549.748	4.98901e-16
DQA53Q	204.304	2.40285e-46	DQB77R	360.562	7.43312e-36	DPB9H	445.391	3.25308e-20	DPB76I	508.088	2.41072e-15	DPB178M	573.735	5.39354e-16
DPB57E	198.753	3.90793e-45	DQB860	366.57	2.21801e-38	DQA50L	518.038	8.28034e-35	C73A	567.356	2.17648e-12	DQB125G	610.366	5.44598e-11
DRB31I	210.641	9.95218e-48	DQB130R	357.257	9.52156e-34	DPB57E	473.86	3.50705e-27	DPB76I	553.29	4.99612e-19	DRB13G	591.848	5.31615e-10
DQA1K	192.689	8.22892e-44	DPB76V	327.835	3.06764e-31	DQA129H	421.263	4.21345e-22	DRB74E	462.32	1.47876e-10	DPB170I	496.142	6.0392e-09
DQB70T	194.426	3.43796e-44	DPB76M	310.962	3.6276e-27	DQA50L	406.801	1.24584e-22	DPB178M	476.66	6.37196e-17	DQB57A	536.316	1.12982e-14
DRB31I	215.851	7.26869e-49	DPB178L	353.261	9.81053e-32	DQB89G	463.39	9.17912e-26	DPB76I	532.079	1.15281e-16	C95L	589.385	3.73008e-14
DPB96R	208.017	3.72001e-47	DQA1E	404.868	1.01618e-44	DRB58N	495.242	1.97127e-21	DQA175E	535.812	1.8974e-10	DRB67L	572.181	1.63245e-09
DQB.18A	194.457	3.3852e-44	DQA26S	336.729	8.47693e-33	DPB9Y	411.104	6.46308e-18	DPB205M	466.212	1.1406e-13	DQA130S	515.427	2.29357e-12
DQB70E	194.55	3.22947e-44	DQB55R	335.426	1.71306e-32	DPB35F	439.818	1.65994e-24	C156L	496.728	4.56304e-14	DQA130S	544.597	4.55646e-12
DQA40E	201.946	7.85367e-46	DRB74E	363.039	6.52992e-37	DPB76V	484.558	2.94147e-28	DPB35L	570.54	1.81653e-20	DRB74A	604.474	5.69905e-09
DPB11G	199.385	2.84467e-45	DQB70T	376.644	1.92268e-40	DRB28E	509.845	8.169e-31	DQB9F	547.587	8.07727e-10	A56R	582.348	3.72829e-09
DRB149Q	196.212	1.40088e-44	DQB167R	343.239	7.74415e-34	DPB205M	450.507	3.88872e-25	DQA.7M	500.996	1.1983e-12	DPB8L	532.385	2.11133e-08
DQA25F	194.94	2.65508e-44	DQB860	351.185	7.4829e-36	DPB205M	434.319	7.66839e-20	DPB170T	494.004	1.11334e-14	DQB182S	545.688	6.52065e-13
DQA.13T	192.893	7.42733e-44	DQB140A	309.029	4.43828e-27	DPB57E	390.02	2.26749e-19	DQA207M	465.991	2.87867e-18	DPB36A	501.194	2.97097e-09
DPB8L	208.086	3.59274e-47	DQB60N	375.317	2.97826e-38	DQB87Y	474.084	2.84053e-23	DRB38V	530.288	6.53389e-14	B156L	583.963	2.36548e-13
DQA41K	192.689	8.22892e-44	DRB13S	338.061	1.78115e-33	DPB57E	463.552	3.97296e-29	DRB60Y	501.822	6.16276e-10	DPB205V	535.454	6.65589e-09
DPB8L	204.97	1.71962e-46	DRB57S	369.538	1.13668e-37	DQB30Y	453.662	4.64554e-20	DRB70R	511.025	3.62404e-14	B.8V	554.938	3.43333e-11
DPB170I	208.796	2.51566e-47	DQB.10S	368.574	1.2646e-36	DQA34E	470.052	7.22629e-24	DQA207M	527.866	2.88099e-14	DPB36A	571.442	4.07997e-11
DRB30Y	213.169	2.79623e-48	DPB1780	343.171	4.0937e-30	DQB26L	407.578	1.0117e-15	DQB57S	478.767	3.24628e-17	DRB38V	521.93	5.0376e-11
DPB205V	259.135	2.64896e-58	DQA.6M	416.569	4.11362e-36	DQA75I	517.434	9.84813e-24	DQB57D	583.524	4.30757e-16	DRB71E	606.125	1.99431e-06
DQA.160	192.689	8.22892e-44	DQA1E	301.449	1.83234e-25	DQB136Q	399.154	4.85479e-23	DPB76I	468.466	8.4042e-17	DPB35F	505.135	1.40054e-09
DRB30H	210.644	9.93715e-48	DQB1970	335.851	4.58575e-29	DPB170T	442.857	4.4399e-25	DQA129H	511.858	9.83941e-17	B80T	565.107	2.93856e-13
DQB70T	194.426	3.43796e-44	DQA175E	348.134	2.68203e-35	DPB96R	484.51	1.6511e-31	DPB55D	549.512	7.48322e-16	DQB197S	583.845	4.64514e-09
DQA.7M	194.916	2.68747e-44	DRB9E	329.739	3.60941e-31	DPB55A	430.303	1.14624e-23	DPB205M	491.39	5.46069e-15	B80N	544.334	3.43317e-13
DQB.27S	194.426	3.43796e-44	DQB74E	329.58	3.05595e-31	DPB35F	397.087	2.09864e-16	B67S	456.948	1.01826e-14	DPB69E	511.655	1.3991e-13
DPB55D	211.152	7.7009e-48	DQB125A	332.147	3.83076e-28	DQA47K	394.732	2.55194e-15	DRB11P	483.109	5.40897e-21	DQB116V	524.785	1.07727e-10
DPB8L	247.494	9.13489e-56	DQB70T	398.978	8.2172e-35	DRB38L	489.994	1.42481e-21	DRB67L	559.977	5.9813e-17	B163T	598.045	6.83377e-10
DQB70R	201.574	9.46918e-46	DPB9Y	339.012	9.67318e-32	DQB136E	450.828	3.9201e-26	DPB57A	498.95	4.00613e-12	C253Q	539.642	1.7818e-10
DQB135D	174.069	9.56285e-40	DQA129Q	278.386	1.72343e-24	DPB55A	364.614	1.60403e-20	DRB96H	439.28	5.57441e-18	DPB76I	496.966	3.07511e-14
DQB.27S	194.426	3.43796e-44	DQB185T	315.976	2.89634e-28	DPB35L	389.035	1.25831e-17	C295A	438.997	1.56746e-12	DRB58F	483.457	2.59568e-11
DRB96Y	207.767	4.21801e-47	DQB185I	323.858	4.54e-27	DPB194Q	400.353	2.20724e-18	DQA215F	447.141	7.90852e-12	B114H	506.384	1.39362e-14
DQB60N	194.426	3.43796e-44	DPB9Y	355.09	8.10294e-37	DQB167R	450.127	1.86837e-22	DQA138T	505.673	9.13116e-14	DRB71E	547.037	1.26325e-10
DQB1160	205.274	1.47548e-46	DPB194R	345.455	2.43056e-32	DQA160S	473.811	9.38321e-30	DPB8L	529.441	8.74564e-14	DQA138I	569.422	2.56502e-10
DPB9H	222.546	2.51736e-50	DQB.18A	381.361	2.05416e-36	DQA11C	511.03	4.84232e-30	DPB1780	550.997	2.58238e-10	C303A	585.856	3.5451e-09
DPB215I	205.971	1.0399e-46	DQA25F	365.424	1.48981e-36	DQB.18V	492.959	1.41886e-29	DPB55A	550.568	3.19703e-14	C163T	595.196	2.38255e-11
DPB84D	239.301	5.58696e-54	DQB203V	394.11	1.54105e-35	DQB89G	492.61	3.2504e-23	C90A	534.776	8.38338e-11	DRB.1S	572.704	7.34145e-10
DQA34E	149.908	1.81538e-34	DRB10Q	281.872	1.52416e-30	DPB69K	340.543	1.86387e-14	DPB65I	393.998	2.64536e-13	DPB205M	445.731	6.35954e-13
DPB215I	207.382	5.11691e-47	DQB13A	366.549	1.72068e-36	DPB76I	447.441	2.38399e-19	DQB182S	533.298	1.93475e-20	C77N	590.883	3.23642e-14
DQB.10S	194.426	3.43796e-44	DPB170T	312.53	1.64486e-27	DQA.7M	395.676	7.62276e-20	DQA160S	468.945	1.13115e-17	DPB178L	505.124	1.80016e-09
DQA175E	200.642	1.51279e-45	DQA.7M	337.824	1.10036e-31	DPB215I	460.68	1.49903e-28	DPB36A	513.44	3.76891e-13	DPB55A	556.823	4.50128e-11
DQA75I	196.645	1.12706e-44	DPB84D	371.401	6.76824e-40	DRB10E	496.608	4.58556e-29	DPB33E	538.206	1.12119e-10	C11A	574.215	1.96389e-09
DQB.18A	198.369	4.73906e-45	DPB55A	340.446	9.35516e-33	DQB126Q	456.665	4.25752e-27	DQA.7V	507.159	1.19534e-12	DPB205V	553.785	8.58963e-12
DQB28S	198.458	4.53286e-45	DQA129Q	341.803	4.94162e-33	DPB55D	441.873	1.47046e-23	DPB76I	503.755	3.64739e-15	C306A	547.098	4.59367e-11
DQB60N	194.426	3.43796e-44	DQB130R	345.746	8.91939e-35	DPB215I	441.647	1.2079e-22	DPB57A	503.59	3.53563e-15	DQA138I	542.084	5.49293e-10
DPB194R	254.267	3.04883e-57	DRB10T	411.461	4.64413e-36	DQB71T	480.983	7.55711e-17	DQA47K	554.419	1.03953e-17	DQA25F	593.63	3.80315e-10
DQB57S	194.426	3.43796e-44	DQA560	341.083	9.32746e-34	DPB8L	437.13	1.12151e-22	DPB194R	506.254	9.25017e-17	DQA69T	543.132	1.25716e-09
DRB51R	198.465	4.516e-45	DPB9H	358.771	9.69977e-37	DQA.16M	466.562	2.98699e-25	DRB10Y	530.627	1.20387e-15	B97T	557.262	2.45707e-07
DPB170I	267.435	4.11081e-60	DRB10E	426.777	1.57519e-36	DQA175E	532.185	9.94497e-25	B95W	581.437	2.25083e-12	DQB56L	638.763	3.69155e-14
DQA75I	202.242	6.7705e-46	DQB57S	356.206	2.35858e-35	DPB205M	463.593	3.66078e-25	DPB178L	511.217	5.16396e-12	A151H	548.208	1.18696e-09
DRB77T	204.838	1.8367e-46	DPB9Y	299.827	1.91484e-22	DRB85V	383.494	5.85653e-20	DQB197S	441.462	2.66376e-14	DQA187A	488.465	7.08678e-12
DQA47K	192.689	8.22892e-44	DPB960	337.094	2.89777e-33	DRB.16V	451.024	1.35008e-26	DPB205M	519.833	1.08473e-16	DQA130S	569.095	2.23948e-12
DRB31I	218.037	2.42456e-49	DPB170I	339.662	2.78761e-28	DQB224Q	437.405	4.76429e-23	DQA47K	490.023	4.05269e-13	DPB33E	532.559	6.9386e-11
DPB69E	228.004	1.62396e-51	DQB.18V	383.477	1.10381e-35	DQB57D	485.346	5.93244e-24	DQA50L	540.874	9.21123e-14	C147L	562.239	3.7979e-06
DQA.7V	202.904	4.85332e-46	DQB57S	356.833	2.4005e-35	DPB178M	429.594	1.46318e-17	DPB76I	489.763	8.70944e-15	DQA215F	521.345	1.91155e-08
DRB70R	201.852	8.23376e-46	DQB26L	333.52	1.76913e-30	DPB35F	426.533	5.19501e-22	C156W	485.188	1.87877e-14	DQA130S	534.463	2.22437e-12
DQB60N	194.426	3.43796e-44	DQB26L	334.379	2.72576e-32	DPB1780	402.313	1.69075e-16	DPB65I	484.415	1.29255e-19	DPB84G	563.941	4.75735e-19
DQB860	194.426	3.43796e-44	DPB9Y	331.48	1.17352e-31	DQA160S	428.433	7.09904e-23	DPB170T	508.163	4.29133e-19	DQB70T	561.78	2.43662e-13
DRB78Y	207.901	3.94335e-47	DPB76V	374.553	3.98496e-38	DQB203I	492.133	2.14281e-27	DPB9H	543.946	6.10355e-13	C306V	587.717	3.69238e-11
DPB57D	274.401	1.24642e-61	DRB.25R	450.358	3.70152e-40	DQA53Q	586.337	2.0163e-31	DQB55P	627.303	1.54896e-10	C114N	659.649	1.29006e-08
DPB9Y	214.641	1.33483e-48	DQA.160	371.59	5.25079e-36	DQB.270	490.273	1.22874e-27	DPB170T	539.132	2.75043e-12	C156L	581.94	6.03851e-11
DPB76M	238.613	7.89292e-54	DQA160D	405.964	2.80273e-38	DRB51R	477.897	2.22632e-17	DQA.16L	526.89	2.56963e-12	DQA69T	566.152	3.70442e-10
DQA.7M	207.208	5.58613e-47	DPB8L	378.287	4.29862e-39	DQA52R	516.664	6.02867e-32	DPB96R	548.505	1.67316e-08	DQA130S	580.395	1.63182e-08
DQB.27S	194.426	3.43796e-44	DRB.24L	339.478	2.09189e-33	DPB11G	430.277	1.59088e-21	DPB9H	480.04	1.7341e-12	DPB96R	532.521	4.3447e-13
DPB69K	251.296	1.35491e-56	DQA75I	425.9	7.30556e-40	DQB.18V	509.874	5.01457e-20	DQB74S	578.879	9.818e-17	B67S	612.375	7.14212e-09
DRB38V	206.233	9.11627e-47	DPB205M	328.978	1.58523e-28	DQA52R	436.48	3.45536e-25	DQA.13T	498.143	4.07619e-15	C90A	546.134	4.2814e-12
DRB96E	210.948	8.53314e-48	DQB1970	346.784	2.16661e-31	DPB36A	449.964	3.06107e-24	C97W	491.276	1.29762e-10	DQA.6T	526.56	2.84876e-09
DQA160S	192.689	8.22892e-44	DPB96R	342.832	1.61378e-34	DQA69T	453.161	8.29883e-26	DQA215F	523.604	4.73834e-17	C116S	582.03	2.111e-14
DQA75I	195.65	1.85834e-44	DQA53G	341.032	1.77197e-33	DPB69K	462.903	2.46377e-28	DPB194Q	538.378	3.69945e-18	C156L	606.018	1.96284e-16
DQB860	194.426	3.43796e-44	DQA138I	302.873	2.14519e-25	DPB76M	400.414	5.27567e-23	DQB9Y	469.289	1.04873e-16	B41A	502.621	7.772e-09
DRB74L	196.832	1.02624e-44	DPB9H	334.506	8.58875e-32	DQB66D	440.379	7.85883e-25	DPB35F	497.276	4.59291e-14	DRB67F	556.022	1.79354e-14
DQB.18A	194.457	3.3852e-44	DPB96R	344.019	2.16119e-34	DQB55P	469.255	4.51765e-29	DPB76I	527.532	2.27707e-14	C94I	587.613	9.10292e-15
DPB69K	259.955	1.75541e-58	DRB96Y	422.076	3.89156e-37	DQA138T	517.225	1.76619e-22	DQB57S	576.034	1.73699e-14	B24A	613.995	7.21846e-10
DQB.27S	194.426	3.43796e-44	DPB11G	356.298	4.4121e-37	DQB135D	447.998	1.00849e-21	DPB178M	518.012	5.89082e-17	DQA138T	566.199	3.87447e-12
DQB860	194.426	3.43796e-44	DQA160A	326.764	1.26175e-30	DPB170T	424.237	5.46043e-23	DQA160S	465.087	1.64363e-10	A68K	496.351	2.25189e-08
DPB76V	209.968	1.39613e-47	DQA.7V	372.133	3.80595e-37	DQA.6T	501.964	4.4638e-30	DPB1780	553.484	7.08491e-13	B152E	590.144	1.40671e-09
DQB45E	199.095	3.29025e-45	DQA34E	336.557	9.55688e-32	DPB76M	439.429	3.57632e-24	DPB1940	486.617	6.44766e-12	DQA47K	526.709	2.42292e-10
DPB11L	234.284	6.93574e-53	DQB860	398.056	1.6964e-37	DQA34E	504.437	6.08417e-25	B114D	544.154	2.93642e-10	DQB.18A	577.751	6.77763e-09
DQA129Q	160.102	1.07504e-36	DRB960	273.051	2.21389e-26	DPB9H	366.013	5.33091e-22	DPB55E	446.144	3.50427e-19	DQA207M	500.23	1.919e-13
DQA207M	192.689	8.22892e-44	DPB178L	337.543	2.31189e-33	DQB185T	437.441	1.60418e-23	DPB33E	505.546	1.55024e-16	DQA75I	569.487	1.28189e-15
DPB1940	234.732	5.53753e-53	DRB71A	415.467	3.35055e-41	DRB28D	499.668	4.46972e-20	DQB87F	571.52	2.31852e-17	B103L	608.814	1.01613e-09
DQB70E	194.457	3.3852e-44	DPB215I	322.98	8.62418e-30	DQA.13T	419.561	8.56592e-23	DQB.270	505.159	2.20524e-20	DPB205M	548.868	3.80987e-11
DPB8L	232.227	1.94857e-52	DQA138I	401.477	1.07879e-38	DQB197S	500.043	3.14436e-23	DQA.16M	565.045	7.47894e-16	DQA11C	594.159	6.82668e-08
DQA1K	192.689	8.22892e-44	DPB35F	346.342	2.75844e-35	DQA34E	455.612	1.41628e-25	DPB1780	519.288	1.46659e-15	DRB58A	575.287	7.24933e-14
DRB73G	204.161	2.58076e-46	DPB76M	342.74	5.44533e-32	DQA.6M	430.332	8.04492e-21	DQA.13A	492.478	3.19014e-15	DPB69K	539.011	9.0074e-12
DPB69K	236.672	2.09091e-53	DQB203V	404.357	2.37052e-38	DQB140T	500.876	8.83746e-23	C94I	546.061	1.79317e-11	DQA207M	587.207	1.41297e-10
DQB.10S	194.426	3.43796e-44	DPB11G	348.097	2.73232e-35	DQA.16M	455.339	3.94154e-25	DPB1780	516.653	4.86532e-15	DQB182S	562.652	1.18309e-11
DQA47K	192.689	8.22892e-44	DQB167R	337.657	2.18238e-33	DPB84D	435.212	5.24038e-23	DQA.7M	492.011	4.82499e-14	B94I	521.633	5.25068e-08
DRB71K	195.006	2.56881e-44	DPB57E	342.712	5.50097e-34	DQA160A	446.532	2.21543e-24	C103L	495.04	3.28964e-12	DRB10T	539.458	2.65145e-11
DQB86G	194.377	3.52329e-44	DPB84D	346.13	7.17588e-35	DRB38L	421.71	3.50896e-18	DQA207V	483.838	3.21814e-15	B.11S	518.955	3.10519e-09
DQB89G	196.955	9.64355e-45	DQB.10S	337.949	1.61443e-32	DPB69E	442.202	1.7805e-24	DQA107T	487.807	1.44637e-11	C73A	529.059	1.33856e-10
DPB65I	234.27	6.98592e-53	DRB.16V	395.438	6.2864e-37	DQA160S	489.588	2.92547e-22	DQA129Q	559.393	6.54687e-17	DPB55A	612.394	3.33317e-13
DQA69L	208.179	3.42924e-47	DPB36A	386.699	1.01962e-40	DQA175E	441.991	1.03913e-13	DRB58A	483.427	1.21792e-10	B95L	505.729	2.32921e-06
DQB70E	194.457	3.3852e-44	DQA40E	338.328	3.79016e-33	DPB9H	451.391	2.09015e-26	DPB35F	519.015	1.97906e-16	B163T	558.273	3.71277e-10
DQA130S	207.208	5.58613e-47	DQB140A	346.381	4.03635e-32	DPB76V	431.835	2.37141e-20	DQA207M	491.348	1.21497e-14	DPB96R	525.268	5.74206e-09
DPB205V	278.3	1.76185e-62	DRB70R	446.505	1.82557e-38	DQA25F	573.138	2.23431e-29	C35Q	610.809	8.37385e-10	DQB70R	644.328	7.0582e-09
DPB57E	258.868	3.02939e-58	DRB9K	415.478	6.22602e-36	DRB71K	476.546	5.51357e-15	DQB220H	547.19	4.28026e-17	DPB1940	590.811	3.98522e-11
DQA.6M	194.916	2.68747e-44	DQB9L	351.177	7.4239e-36	DPB205V	475.684	6.52326e-29	DPB69E	508.455	1.03726e-08	C113H	536.558	1.14997e-07
DPB205V	211.952	5.15181e-48	DQB57S	374.89	2.58085e-37	DQB167R	496.577	2.70322e-28	DQA160D	537.793	1.36323e-10	C90A	586.003	3.82884e-12
DRB58A	195.947	1.6006e-44	DPB1940	327.776	1.63076e-30	DRB57D	419.679	9.10321e-22	DQB53L	467.418	4.87004e-12	C.15I	504.559	1.09868e-09
DQB70T	194.426	3.43796e-44	DPB55D	332.119	8.50426e-32	DQB224Q	433.417	7.91661e-24	DQA47K	477.192	3.68314e-11	A116D	522.414	1.75874e-11
DRB71K	193.181	6.42846e-44	DQB136Q	332.413	3.91868e-32	DPB76M	446.454	1.27614e-26	DPB84D	514.63	1.4955e-16	DQA69L	557.693	5.30156e-11
DRB.24L	213.351	2.55121e-48	DPB36A	367.777	1.86931e-35	DQB125A	480.591	2.37007e-26	DPB76V	557.968	1.41214e-18	C156R	600.817	5.91341e-11
DPB76M	269.043	1.83465e-60	DQB45E	432.935	1.59723e-37	DRB58S	551.92	1.05478e-27	DRB9E	584.017	1.46677e-08	A17R	611.403	1.66636e-07
DRB58D	195.065	2.49352e-44	DQB57V	329.11	5.34045e-31	DPB9H	429.236	1.43019e-23	DPB84D	534.972	8.42606e-25	DQA207V	576.639	1.08179e-10
DPB84D	223.928	1.25771e-50	DQB30Y	397.127	1.48094e-39	DQB.18V	507.011	1.03881e-25	C97R	551.844	2.14658e-11	DQA47K	593.795	9.35796e-11
DPB55D	242.574	1.0799e-54	DQB26G	391.433	3.0793e-34	DQB125G	456.359	7.77598e-16	A79G	487.811	2.04453e-08	DRB13S	522.219	4.46874e-09
DRB38V	201.643	9.14787e-46	DQB116V	323.87	2.05882e-28	DPB205M	415.813	8.92119e-22	DPB84V	476.492	6.7191e-15	B63E	534.06	3.26423e-14
DQA.13T	207.208	5.58613e-47	DPB69E	342.169	3.36648e-31	DQA138T	447.712	9.28387e-25	DRB13G	505.412	3.0533e-14	DPB960	547.126	1.05643e-10
DQA207V	192.893	7.42733e-44	DPB35F	333.991	1.53161e-32	DQA160S	429.785	1.27498e-22	DRB57S	491.969	3.12772e-15	DPB76V	540.855	2.71279e-12
DQA.6M	194.916	2.68747e-44	DPB96K	342.593	5.58245e-34	DQB30H	421.11	7.93024e-19	DRB71E	471.263	1.42184e-12	A.15V	511.342	2.43934e-10
DQA.6T	192.689	8.22892e-44	DQA187A	348.916	7.55374e-36	DPB1940	453.11	1.83445e-24	DQB30Y	495.933	5.99106e-11	C177E	532.754	1.2952e-09
DRB51R	195.067	2.49132e-44	DPB9Y	355.391	9.61094e-37	DQA1K	471.969	3.55169e-27	DPB960	538.752	3.03164e-16	C.17T	598.861	8.97089e-15
DQA138T	194.916	2.68747e-44	DRB11P	333.829	4.60068e-32	DPB69K	432.758	2.61818e-23	DQB116V	494.593	3.73429e-15	B95I	521.917	1.72054e-07
DPB170T	230.352	4.9965e-52	DQA.7V	404.634	8.58751e-40	DQB220H	529.901	4.45029e-29	DPB57D	579.354	2.03115e-12	DQB30H	617.043	8.29944e-10
DPB35F	207.966	3.81593e-47	DQB.10S	392.028	6.29014e-42	DQA50L	532.526	2.07138e-32	DPB96R	566.597	5.31421e-09	DQA52R	590.73	8.98801e-07
DQA.7M	194.916	2.68747e-44	DQB136E	351.177	7.4239e-36	DPB36A	469.341	1.59601e-27	DPB65I	528.709	1.30825e-14	C73A	572.006	4.70253e-11
DQA130S	194.916	2.68747e-44	DRB74R	349.198	2.00977e-35	DPB35Y	487.363	6.70626e-32	C73A	550.986	1.50641e-15	DQA138T	582.427	2.05636e-08
DRB74R	204.621	2.04912e-46	DQA.7M	340.046	2.66435e-31	DPB11G	421.154	2.13736e-19	DPB205M	513.504	7.26358e-22	C21H	555.094	1.12542e-10
DQB57S	194.426	3.43796e-44	DPB57D	306.249	3.90742e-26	DPB170T	428.862	1.69485e-28	DQB.270	520.553	1.01322e-21	DQA.160	584.481	1.29051e-15
DQB56L	194.426	3.43796e-44	DRB13H	346.502	6.09697e-35	DPB215I	462.708	4.28542e-27	DQA.7V	513.273	1.15298e-12	DPB57A	553.194	2.64392e-10
DQB86G	194.55	3.22947e-44	DRB71K	328.082	6.91667e-31	DPB11G	422.353	2.75133e-22	DQA160S	471.122	2.87995e-12	DPB33E	517.811	8.32024e-12
DPB1940	220.374	7.49738e-50	DRB26L	344.964	6.25639e-29	DRB86V	467.729	1.56977e-28	DQA160S	526.4	1.86367e-14	B171H	557.363	2.62983e-08
DQA160D	194.916	2.68747e-44	DQB9F	357.784	2.67395e-37	DPB11G	485.156	1.53997e-29	DPB9H	537.886	3.82736e-13	DQB57D	574.833	1.21355e-09
DPB96K	195.568	1.93618e-44	DQB70E	359.044	1.96906e-37	DQA26S	437.465	8.32854e-19	DQB70R	521.253	5.50658e-20	DPB9H	587.285	4.43793e-16
DQB57S	194.426	3.43796e-44	DQA53Q	336.964	7.41716e-33	DPB69E	410.512	9.82028e-18	DQB30H	474.595	1.1928e-15	C9D	526.562	5.64479e-13
DRB26L	206.099	9.75106e-47	DQB1160	343.723	8.80395e-32	DPB1780	438.436	2.20125e-22	DQA160S	470.478	1.50866e-08	DQB71T	507.718	1.04469e-09
DPB170I	284.281	8.76604e-64	DQA.160	436.834	4.79591e-35	DQB26L	562.145	4.35079e-29	DQA207M	602.828	1.7905e-10	C152A	627.194	7.96567e-07
DQB860	194.426	3.43796e-44	DPB69K	311.355	2.97528e-27	DPB57A	412.155	1.01762e-23	DQA11Y	488.358	2.55907e-18	DQB57A	524.227	2.11103e-09
DQA69T	207.208	5.58613e-47	DPB96R	347.187	2.68994e-32	DQB57A	451.324	1.88811e-24	C116S	508.005	5.12431e-14	DRB58S	553.436	1.58114e-11
DRB149Q	207.769	4.2131e-47	DQA52R	333.27	3.95334e-29	DPB194Q	408.421	4.36123e-18	DPB69K	456.228	4.70328e-12	C116S	498.047	1.00135e-10
DRB96H	216.864	4.37024e-49	DPB205V	363.302	1.04095e-33	DQA.7M	442.771	4.89898e-19	DPB57A	520.172	1.39547e-18	DRB13S	576.349	6.62443e-14
DPB9Y	250.241	2.30049e-56	DQB57S	411.385	6.36392e-37	DQA69L	528.547	2.6458e-27	DQB30Y	564.489	2.03273e-09	DQA160S	595.107	3.14148e-08
DPB36A	252.386	7.83821e-57	DQB26G	402.666	1.50596e-34	DQA129Q	451.112	3.39527e-12	DQB60N	543.652	6.59715e-22	DRB57D	580.089	1.57656e-09
DQA1K	125.34	4.28898e-29	DRB58Y	228.975	2.43228e-24	DPB33E	319.486	1.83894e-21	DPB57A	390.546	3.46567e-17	DQB30H	447.95	3.54832e-14
DQB136E	194.426	3.43796e-44	DRB28D	298.63	1.82485e-24	DPB178M	374.413	3.16606e-18	DPB35Y	448.969	5.89654e-18	DQB.18A	500.62	6.62722e-13
DQB182S	212.981	3.07266e-48	DQB185I	349.975	1.20939e-31	DPB35F	448.114	3.89968e-23	C.15I	505.2	4.17162e-14	DQA138T	547.585	7.49818e-11
DQB60N	194.426	3.43796e-44	DPB69E	350.978	6.41113e-36	DQA.16L	453.996	3.3216e-24	DPB170I	501.299	6.083e-12	DQA.13A	536.381	3.16073e-09
DQA.7M	192.247	1.02754e-43	DQB87F	333.123	1.71281e-32	DPB9H	461.766	8.11825e-30	DPB84V	525.536	1.39854e-15	DQA47K	564.807	3.68903e-10
DRB51R	195.08	2.47439e-44	DPB76M	376.243	2.70187e-41	DQA69L	494.076	1.88592e-27	DPB57A	542.712	3.08177e-12	C116Y	585.157	7.27066e-11
DRB85A	209.914	1.43391e-47	DPB69E	350.97	1.56442e-32	DQA560	466.438	6.21487e-27	DQB.18V	523.516	4.1898e-14	DPB178L	567.066	4.13174e-11
DPB57D	210.968	8.44751e-48	DQB13A	376.098	8.56962e-38	DQB140A	486.036	1.0107e-25	C116F	546.837	6.31515e-15	DPB194Q	601.602	1.35809e-13
DQA207V	207.208	5.58613e-47	DPB1940	373.65	4.42921e-38	DQA160S	470.403	7.85156e-23	DQA52R	542.859	1.70776e-17	DPB55A	595.544	3.91669e-13
DQA160A	207	6.20045e-47	DQB185T	360.6	2.83235e-35	DPB9Y	478.887	1.49991e-27	C95I	521.415	6.97045e-11	DQA26S	562.864	1.20964e-10
DQB57S	194.426	3.43796e-44	DRB58N	344.523	1.65084e-34	DPB178L	459.803	6.8344e-27	DPB205M	542.046	1.20349e-19	DQB30Y	588.22	1.08181e-11
DRB13F	218.274	2.15242e-49	DPB96R	362.053	3.97145e-33	DQA34E	462.237	1.38868e-23	DQA69T	512.265	1.51529e-12	DPB205M	554.036	1.02632e-10
DPB76M	208.487	2.93722e-47	DRB149Q	397.209	6.04315e-43	DQA25F	499.115	5.82404e-24	DRB71K	561.143	3.3846e-15	DPB215I	605.037	3.4672e-11
DPB9Y	197.759	6.43893e-45	DQB185I	359.32	5.16112e-37	DQA175E	469.888	7.35739e-26	DRB26L	522.724	3.626e-13	B116Y	555.035	1.3134e-08
DQB57S	194.426	3.43796e-44	DPB11G	352.206	3.45661e-36	DQA41K	443.554	1.20491e-21	DQB136Q	516.474	1.35048e-17	DPB194Q	569.494	3.30092e-13
DQB.10S	194.426	3.43796e-44	DQA160A	336.84	7.89535e-33	DPB8L	419.394	1.02833e-19	DPB76M	473.065	2.36998e-13	DPB194Q	530.9	2.85102e-14
DQB.27S	194.426	3.43796e-44	DPB9H	346.814	5.21249e-35	DQB86A	469.107	1.99156e-28	DQA75S	526.855	2.97829e-14	A76V	562.568	2.28644e-09
DRB74E	201.831	8.3225e-46	DQB126Q	366.636	1.00933e-37	DPB36A	429.75	1.9508e-15	C35Q	476.518	7.98927e-12	DRB60Y	510.47	5.64922e-09
DQA107T	202.572	5.73599e-46	DRB10E	358.764	7.68595e-36	DPB194R	453.652	2.01423e-22	DPB35L	525.058	2.90891e-17	DQA215F	568.4	4.59478e-11
DQB56L	194.426	3.43796e-44	DPB8L	376.64	1.59237e-41	DQA53G	478.452	6.10412e-24	DQB57A	556.389	1.06369e-18	C285V	604.031	5.11804e-12
DQB87F	199.981	2.10832e-45	DQB.10S	341.954	9.85675e-33	DPB9Y	393.143	8.39054e-13	DPB57D	467.828	5.52058e-18	DPB55A	517.508	1.81011e-12
DQB71T	201.882	8.11345e-46	DPB76V	336.752	3.52538e-31	DQB.27A	445.455	1.88447e-25	DPB55A	515.635	5.41422e-17	DQA69L	573.952	2.23159e-14
DPB65I	200.757	1.42736e-45	DQA1K	366.501	6.2928e-38	DQB9Y	461.456	1.948e-22	DQA.7M	518.997	3.31051e-14	C219R	567.14	3.96092e-12
DQB.10S	194.426	3.43796e-44	DPB178L	334.095	3.14436e-32	DQA.6T	424.829	1.64345e-21	C156L	503.194	8.56598e-19	DQA175E	557.386	1.81802e-13
DQB.10S	194.426	3.43796e-44	DQA.6M	303.109	1.90468e-25	DPB33E	386.594	6.41942e-20	B67F	446.437	1.02707e-14	DPB178L	506.244	1.04643e-14
DPB11G	205.574	1.2692e-46	DQB70T	369.626	1.47348e-37	DQB197S	476.48	4.79331e-25	DQA160A	525.447	2.60281e-12	DPB170T	560.624	3.01098e-09
DQA138T	207.208	5.58613e-47	DPB76M	378.207	4.47642e-39	DQB71T	471.794	3.88601e-22	DPB178L	522.891	8.79534e-13	DRB10E	571.319	3.4263e-12
DQA41K	192.689	8.22892e-44	DPB9H	336.1	4.78018e-33	DQA207M	429.512	4.2458e-22	DRB57A	489.714	8.56347e-15	DPB55E	540.726	9.18082e-13
DQB9L	194.426	3.43796e-44	DPB96R	355.622	6.19789e-37	DQB140A	456.219	1.1276e-23	DQA160A	497.815	1.1222e-10	C66K	536.524	4.92063e-10
DPB96K	205.567	1.27344e-46	DRB74L	365.826	9.93358e-37	DQA.6M	473.09	3.89777e-25	DQA47K	531.988	1.66046e-14	C275K	572.86	1.62536e-10
DPB69K	198.613	4.19329e-45	DQB56L	361.808	2.26716e-37	DQB135D	469.385	3.32746e-25	DPB205M	513.123	3.754e-11	DQA.13T	548.589	2.59586e-09
DQB136E	194.426	3.43796e-44	DPB96R	338.246	3.8905e-33	DRB74A	445.627	3.67304e-25	DQA138I	494.468	2.77538e-12	C9D	534.217	2.88731e-10
DPB170I	254.717	2.4329e-57	DQB86G	419.11	1.24119e-37	DQA560	547.926	7.44033e-30	C.150	581.736	6.07764e-09	DQA69T	612.678	2.65899e-08
DQA138T	207.208	5.58613e-47	DQB185T	338.184	2.50604e-30	DPB96K	434.355	1.05342e-22	DPB205V	515.099	2.56965e-19	DQA.7M	573.967	1.68652e-14
DPB55A	177.43	1.76407e-40	DRB74R	322.043	2.60945e-33	DQB125A	422.626	1.13573e-23	DPB65I	476.498	2.13937e-13	DQA1K	522.673	1.08187e-11
DQB60N	194.426	3.43796e-44	DPB96R	330.27	2.15797e-31	DQA107T	456.684	2.49656e-29	C77N	513.759	4.19521e-14	DQA53G	554.241	1.98414e-10
DQA207V	207.208	5.58613e-47	DQA69T	362.064	1.50548e-35	DPB35F	426.526	9.84114e-16	DPB170T	478.795	4.83933e-13	C152A	516.491	8.26741e-10
DRB73G	218.523	1.89962e-49	DPB194R	400.542	1.75618e-41	DRB58A	477.573	1.68302e-18	DPB57E	523.652	1.13534e-11	DPB11G	566.754	5.19701e-11
DPB65I	210.099	1.30708e-47	DQB185T	378.69	1.50308e-38	DQB87F	449.031	4.98687e-17	DRB30H	530.682	1.62375e-19	B95L	587.427	4.96161e-14
DRB133R	212.426	4.06155e-48	DPB55D	334.578	2.13742e-28	DQB197S	442.043	3.52173e-25	DQA138I	496.321	1.73982e-13	DPB960	542.922	8.70317e-12
DPB36A	293.036	1.08383e-65	DQB.10A	459.418	4.56639e-38	DQA160S	548.716	3.39524e-21	DRB58F	602.113	2.72596e-13	A95L	634.798	1.08373e-08
DQB.27S	194.426	3.43796e-44	DQA1K	302.873	2.14519e-25	DPB55E	391.774	4.1499e-21	DPB11G	471.036	5.44049e-19	DQA41K	521.018	1.55152e-12
DQB30Y	173.659	1.17512e-39	DRB32H	275.742	5.32405e-24	DPB178L	368.845	4.96533e-22	DPB205M	472.423	2.50318e-24	DQA187A	548.742	2.4135e-18
DPB96K	255.359	1.76256e-57	DQB37Y	426.556	4.05227e-39	DQA.13T	519.329	5.86728e-22	B.10G	585.574	3.98032e-16	DQB185I	635.465	1.6256e-12
DQA53Q	198.47	4.50529e-45	DPB194R	356.257	3.44531e-36	DQB60N	487.416	2.28553e-30	C304M	522.747	2.78188e-09	DRB74L	546.845	9.15233e-07
DRB57A	195.353	2.15766e-44	DPB215I	326.985	1.8008e-30	DQB38A	438.301	5.04491e-26	DQA.7M	500.562	3.00863e-15	DPB960	554.913	1.67674e-13
DRB58L	194.842	2.78897e-44	DPB9Y	344.836	1.73903e-34	DQB86A	447.216	4.58334e-24	DQA.6T	493.088	1.26257e-11	C156Q	535.866	6.13138e-11
DQB220R	194.587	3.17117e-44	DPB57E	360.403	6.06594e-38	DQB126Q	468.832	2.16469e-25	C152E	526.551	3.02457e-14	DRB96H	566.44	2.6877e-10
DQB.10S	194.426	3.43796e-44	DQB55P	308.05	1.57485e-26	DPB57D	385.348	1.47069e-18	C97W	432.734	5.82971e-12	DPB84G	483.369	1.11237e-12
DQA160S	192.689	8.22892e-44	DPB170T	305.268	2.66869e-26	DQA1K	404.755	1.97493e-23	DQB224Q	468.944	1.13015e-15	DPB1940	516.517	5.2979e-12
DPB76M	231.449	2.87952e-52	DQB74E	399.654	1.82524e-38	DQA560	494.764	1.80106e-22	B.16V	540.371	1.44455e-11	A114Q	584.104	3.76531e-11
DRB78V	207.767	4.21801e-47	DRB30Y	343.348	2.46351e-31	DPB960	427.031	5.80912e-20	DPB178M	485.789	1.78338e-14	DQA47K	534.376	3.15937e-12
DPB55E	185.725	2.72631e-42	DQB9F	318.998	7.87911e-31	DQA129H	418.615	1.84945e-23	DQA175E	497.055	8.24258e-19	DQA69L	536.594	3.21596e-10
DPB9Y	197.999	5.70941e-45	DRB74A	302.4	1.65236e-24	DQA69T	402.35	1.56244e-23	DQB13A	489.57	9.7135e-21	C219W	553.339	1.39895e-15
DPB9H	229.86	6.39559e-52	DQA69T	397.055	3.03269e-38	DQA.6M	532.492	2.64928e-31	DRB26F	571.589	4.03247e-10	C275E	605.111	7.04776e-09
DRB57A	207.767	4.21801e-47	DRB58Y	331.207	1.11708e-28	DPB76M	432.276	8.88446e-24	DRB10Y	504.692	1.74294e-17	DPB65I	553.316	3.10035e-12
DQB860	194.426	3.43796e-44	DQB182S	315.405	3.8615e-28	DPB9H	409.263	3.39074e-22	DQA47K	470.899	4.13037e-15	DPB178M	527.948	4.25165e-14
DQA.13A	196.31	1.33377e-44	DQB.10S	351.551	1.24047e-35	DPB96R	454.264	3.87389e-24	A95V	480.847	2.52392e-07	B177D	510.289	5.76383e-08
DRB38V	196.557	1.17811e-44	DQA160A	365.784	1.09133e-38	DPB205V	455.074	3.40992e-21	DRB71E	501.859	7.92357e-12	B.16V	543.837	9.23087e-11
DQA26S	176.056	3.52125e-40	DQA.6M	347.84	3.01595e-39	DPB57D	469.528	2.70184e-28	C219W	532.939	1.6779e-15	B67S	585.663	3.83852e-13
DRB74R	195.353	2.15766e-44	DPB69E	328.143	1.00481e-30	DQA.160	436.332	2.44405e-25	DRB71E	503.664	2.29399e-16	DPB57A	547.354	3.84823e-11
DQB860	194.426	3.43796e-44	DPB178L	321.438	1.84686e-29	DQA215F	432.246	6.51605e-26	DRB58Y	503.047	3.95261e-17	DPB1780	561.88	1.71646e-14
DPB69K	207.575	4.64492e-47	DRB77T	372.885	7.82699e-38	DQA175E	501.899	6.73485e-30	DPB35F	552.703	1.0203e-12	C147L	592.24	3.2201e-10
DPB9H	191.85	1.25452e-43	DRB74L	335.13	5.10599e-33	DRB26F	436.02	9.72416e-24	DQB136E	491.229	1.0835e-13	DQA26S	535.843	2.39934e-11
DPB36A	192.953	7.20748e-44	DQA41R	349.779	5.58553e-36	DQB26G	461.835	3.47434e-26	DPB205M	528.853	2.69008e-16	C306V	586.66	2.89134e-14
DQA138I	192.689	8.22892e-44	DQA69L	316.399	9.75248e-29	DPB57E	408.746	7.2739e-22	DPB8L	483.008	6.83942e-18	DQA.7M	525.454	7.265e-11
DPB170I	252.514	7.35108e-57	DQB.10S	414.097	5.10207e-37	DQA26S	536.647	1.75019e-28	DQA160A	568.365	1.78258e-08	B158A	594.581	3.05164e-07
DQA47K	192.689	8.22892e-44	DQB71T	345.351	4.54149e-35	DPB76I	410.738	6.15419e-16	C9Y	467.372	5.24963e-14	DQA41K	516.753	2.10746e-12
DRB96Y	194.663	3.05127e-44	DPB76M	350.164	1.08825e-35	DQA69L	472.963	1.54346e-28	DQB9F	520.682	4.91811e-12	DPB35L	560.28	3.11985e-10
DPB215I	206.322	8.71833e-47	DQA53Q	377.664	3.7666e-39	DQA.13T	513.871	1.7974e-31	DQB167R	559.782	1.23777e-11	B95L	609.699	1.60364e-12
DQB203V	198.369	4.73906e-45	DPB35F	356.068	3.60111e-36	DQB140T	475.42	8.77199e-28	C113Y	528.633	2.99202e-13	B181R	551.944	1.37852e-06
DPB11G	197.532	7.21932e-45	DQB60N	363.105	6.85486e-38	DQA11C	474.448	4.9783e-26	DQB55P	517.96	4.21214e-11	C.170	573.56	8.88551e-14
DQA160D	207.208	5.58613e-47	DQB125G	347.636	2.1455e-32	DPB11G	455.469	2.92384e-25	DPB205M	543.051	8.08567e-21	DRB96H	580.14	1.12876e-09
DQA.13T	207.208	5.58613e-47	DPB96R	378.111	4.69843e-39	DQB86A	505.438	1.57509e-29	DPB69E	561.418	7.32093e-14	DRB57A	605.501	3.14806e-11
DQB70E	194.55	3.22947e-44	DPB96R	315.707	3.5317e-28	DPB35L	412.528	7.58856e-23	DQA175E	496.088	6.1798e-20	DRB30H	552.464	5.98585e-14
DQA.6T	192.689	8.22892e-44	DPB9H	332.929	2.35928e-32	DQB125G	437.352	1.63435e-24	DPB55D	485.733	3.50946e-12	DRB70D	533.346	5.19236e-12
DQB57V	198.385	4.7012e-45	DPB76V	357.193	2.06176e-36	DQA1K	455.174	4.22272e-23	DPB9H	521.846	3.20711e-16	DQB66D	571.389	1.94112e-12
DQB1970	202.936	4.7767e-46	DQB57A	345.889	6.01948e-33	DPB205V	469.398	1.07866e-28	DPB170T	530.245	6.17101e-15	DRB47F	570.101	2.73382e-10
DQA187A	195.65	1.85834e-44	DPB9Y	361.563	5.77996e-38	DQA.13T	501.209	3.18078e-32	DQA175E	552.882	6.55842e-13	DPB76I	583.455	3.21515e-08
DQA160S	192.689	8.22892e-44	DPB76M	306.867	1.19115e-26	DQA50L	409.336	4.38218e-24	C00	468.331	1.5809e-14	DQB57D	514.315	1.19215e-11
DQA130S	207.208	5.58613e-47	DQB89G	360.771	2.88508e-35	DPB55A	457.627	7.4573e-23	C95L	518.365	6.51736e-15	DQA47K	562.656	2.83077e-11
DRB78V	204.621	2.04912e-46	DRB26F	324.148	8.02794e-28	DPB76M	403.033	6.58225e-19	DPB96R	462.94	9.94875e-15	DQA52R	515.934	3.34427e-13
DQB26L	196.367	1.29615e-44	DPB170I	341.955	1.59731e-33	DQA130S	474.346	1.22886e-30	DQA138T	537.924	1.54124e-15	B116F	575.911	7.12342e-10
DPB35F	209.667	1.6237e-47	DQA107T	388.277	9.74803e-41	DQA25F	523.182	3.46393e-31	DPB36A	591.036	1.76078e-16	DQA53G	627.023	1.98573e-09
DQA53Q	207.429	4.99838e-47	DPB36A	371.168	1.72501e-37	DQA11C	481.346	8.95796e-26	DQA160D	542.436	5.45162e-15	C.170	581.741	3.6251e-10
DPB65I	217.465	3.23027e-49	DQA.13A	399.916	1.41357e-41	DQA41K	530.105	3.7257e-30	DQA.7V	564.703	4.05419e-09	C156Q	597.344	1.10864e-08
DPB57E	173.829	1.07872e-39	DQB87F	305.695	1.60058e-30	DQA25F	391.414	2.0743e-20	DPB76I	444.982	2.4983e-13	DQA.13T	495.696	1.06821e-12
DQB45E	199.095	3.29025e-45	DPB9H	335.653	1.50678e-31	DQB86A	454.643	1.05268e-27	DPB33E	524.455	6.52145e-17	B163L	579.762	1.03124e-13
DQA130S	194.916	2.68747e-44	DRB73G	352.074	4.72639e-36	DPB9H	459.198	4.18325e-25	DPB194Q	541.476	1.18238e-19	DQA129H	572.269	2.87002e-08
DQA130S	207.208	5.58613e-47	DQB30H	344.129	1.25481e-31	DPB35F	455.775	4.27108e-26	DQA69T	503.841	4.12137e-12	C152E	540.469	1.42922e-09
DRB51R	210.819	9.10362e-48	DPB69K	357.701	8.32628e-34	DPB76I	443.28	2.22652e-20	DQB89G	512.355	9.48017e-17	DRB47F	576.543	1.13096e-15
DRB57A	198.785	3.84475e-45	DPB96R	369.259	5.83054e-39	DQB224Q	500.196	2.556e-30	B69T	544.839	2.36433e-11	DQA138I	586.803	9.30013e-11
DPB57E	193.531	5.3907e-44	DRB85A	317.052	1.07266e-28	DRB60S	431.926	8.38354e-27	DQB140T	481.033	2.42427e-12	DQA560	539.668	1.89786e-14
DQB60N	194.426	3.43796e-44	DPB205V	333.754	3.73458e-32	DQA138T	433.179	2.03716e-23	DRB233T	499.235	4.38342e-16	DPB33E	549.306	1.48266e-12
DQB57S	194.426	3.43796e-44	DPB55D	337.353	6.09929e-33	DQA1K	448.658	5.0726e-26	DPB205M	502.468	2.20827e-13	C77N	558.073	8.85888e-14
DQA53Q	206.924	6.44275e-47	DPB11G	327.335	5.1423e-28	DQB30Y	418.91	1.07432e-21	DQA.13A	493.912	4.70221e-18	DPB76M	528.947	3.23841e-09
DQA138I	192.689	8.22892e-44	DPB55E	277.891	2.69451e-20	DPB194Q	352.626	5.38356e-18	DRB67F	421.784	9.08548e-17	DQA41K	480.037	2.30527e-14
DPB9Y	233.912	8.35884e-53	DQB56L	399.918	5.5166e-38	DQB125G	507.427	3.44314e-25	C114D	554.674	6.2568e-12	DQA.7M	595.768	1.45094e-10
DRB57A	195.08	2.47439e-44	DQA207M	303.832	1.83905e-25	DPB170I	398.58	2.16245e-22	DPB76I	476.474	1.08734e-18	DQA107T	550.706	6.94607e-18
DQB77R	199.276	3.00447e-45	DQA47K	340.623	1.35105e-32	DPB9H	475.487	3.53662e-31	DPB194Q	555.023	4.73556e-19	C304V	596.264	1.34575e-10
DQB28S	198.458	4.53286e-45	DPB9H	310.946	2.79387e-26	DQA34E	402.532	1.06812e-21	DPB35L	469.103	3.3752e-16	DQB9F	523.648	1.51931e-13
DPB170I	207.306	5.31637e-47	DQB126Q	352.522	1.92686e-33	DPB194Q	418.129	5.50274e-16	DRB11P	488.518	4.86903e-17	C156R	532.104	4.05799e-11
DPB215I	262.115	5.93596e-59	DQB86G	427.022	9.58461e-38	DQB197S	520.263	4.6297e-22	C77N	561.913	1.09162e-10	DQA69T	602.895	1.53691e-10
DQB203V	195.143	2.3979e-44	DPB36A	352.05	5.36401e-36	DQA207V	464.383	3.02087e-26	DQB136Q	545.463	2.1672e-19	DPB96R	605.23	1.06769e-14
DRB51R	218.094	2.35546e-49	DPB205V	383.677	6.82316e-38	DRB70Q	489.764	7.05638e-25	C152E	543.958	1.81642e-13	DQA53Q	580.829	1.26241e-09
DQB70T	194.426	3.43796e-44	DQA175E	321.676	1.63813e-29	DPB205V	450.093	9.09687e-30	C194V	487.502	9.57853e-10	DRB58A	528.672	1.39493e-10
DPB36A	230.824	3.94229e-52	DQB87Y	391.066	1.0014e-36	DQB185I	505.801	8.99634e-27	DRB73G	547.103	1.30414e-10	DPB69E	589.506	7.43058e-11
DRB73A	216.895	4.30315e-49	DPB55D	357.242	2.23422e-32	DQA138T	445.233	6.57748e-21	DPB205M	526.331	2.14764e-19	DRB60Y	600.193	8.37587e-18
DQA138I	192.689	8.22892e-44	DPB960	329.88	1.09547e-31	DQA160D	428.002	3.93341e-23	DQA.13T	494.475	3.5483e-16	C.170	531.579	1.11944e-09
DPB170I	220.03	8.90915e-50	DRB71A	353.059	8.9095e-31	DQA69T	473.113	6.15603e-28	DQB87Y	560.197	1.04009e-20	C99Y	614.872	1.42217e-13
DQB185T	209.178	2.07574e-47	DQA47K	331.431	2.0321e-28	DPB55D	436.61	1.11586e-24	DRB86V	506.38	6.66373e-17	DPB9Y	547.974	1.1232e-10
DQB203V	198.369	4.73906e-45	DPB205V	361.795	2.0199e-37	DQA138T	516.699	1.46909e-35	C275E	556.618	2.64771e-10	DQB9Y	599.243	6.63085e-11
DQB70T	194.426	3.43796e-44	DPB215I	392.56	5.33296e-45	DQA69T	489.291	7.94313e-23	DPB178M	553.96	8.86061e-16	DQB86A	616.99	2.0355e-15
DRB11L	204.566	2.10611e-46	DQB220R	316.874	3.05922e-26	DPB55A	388.393	2.74596e-17	DPB205M	451.805	1.67709e-15	DRB96E	496.4	2.42313e-11
DPB205V	209.022	2.24481e-47	DQA138T	391.694	1.26532e-41	DQA34E	495.953	1.77504e-24	DQA1K	560.273	1.05737e-15	B77D	601.386	1.43695e-10
DQB57D	180.794	3.25073e-41	DRB58N	316.105	2.8233e-31	DPB57E	403.534	8.73657e-21	C77N	481.105	1.28058e-18	DQA138I	551.711	4.36104e-17
DQB136E	194.426	3.43796e-44	DPB170I	340.333	1.36023e-33	DQA160S	433.619	4.52658e-22	DPB205V	508.15	5.96858e-18	DQA.6M	567.134	1.58956e-14
DQA69T	207.208	5.58613e-47	DQA130S	362.064	1.50548e-35	DPB9Y	470.812	1.8427e-25	DPB170T	528.169	3.63361e-14	DQB125A	568.02	2.74191e-10
DRB58F	206.741	7.06092e-47	DPB8L	362.004	1.2266e-35	DQA160A	454.462	6.8792e-22	DRB51R	499.775	1.67903e-11	C219R	543.551	3.68102e-11
DQA138T	194.916	2.68747e-44	DQA47K	350.155	1.24143e-35	DPB36A	454.06	2.12252e-24	DPB178M	513.948	1.00402e-14	DPB57A	556.819	5.84719e-11
DPB76V	195.247	2.2761e-44	DQB203V	352.865	3.74963e-36	DQB74E	494.169	1.38058e-32	C163T	545.943	6.22763e-13	DRB.24F	581.549	2.41522e-09
DPB57E	255.21	1.89913e-57	DRB96H	423.616	1.64968e-38	DQA160S	509.224	2.19361e-20	C21H	574.086	8.03572e-16	DPB170T	625.758	6.55838e-13
DQB136E	194.426	3.43796e-44	DPB84D	336.573	9.0304e-33	DQA160D	445.894	1.38013e-25	DPB170T	519.36	1.02397e-17	DQB185T	591.518	1.98591e-17
DPB9Y	177.954	1.35541e-40	DQA41K	293.696	5.41405e-27	DRB960	395.331	6.67472e-24	DRB71E	470.88	3.56552e-18	DPB57E	516.73	1.27667e-11
DRB670	195.065	2.49352e-44	DPB1780	352.364	4.40331e-36	DQA.6M	486.806	4.37351e-31	C77N	545.779	1.59884e-14	DPB205M	591.578	1.3102e-11
DRB670	195.065	2.49352e-44	DQB185I	333.853	4.90196e-32	DPB1780	454.521	4.51718e-28	DQA41K	489.978	2.60748e-09	DQB26G	531.598	1.10815e-10
DQB860	194.426	3.43796e-44	DQA.7V	319.934	3.93957e-29	DPB65I	420.837	9.66159e-24	DQA130S	466.775	1.22024e-11	DPB205M	509.963	4.97221e-11
DQB9F	198.359	4.76438e-45	DPB84G	352.171	2.54511e-35	DQA207V	450.899	2.89752e-23	DRB96E	510.732	1.03259e-14	DPB35Y	560.268	1.94766e-12
DQB60N	194.426	3.43796e-44	DQA160S	302.873	2.14519e-25	DQB66D	392.11	3.50299e-21	DPB57A	452.375	8.28793e-15	DPB170I	546.274	3.32085e-22
DQA1E	207.208	5.58613e-47	DPB55E	325.741	1.32519e-27	DRB.16A	410.618	3.17537e-20	DPB65I	488.78	9.4924e-19	DRB70D	559.167	4.87247e-17
DRB149Q	221.551	4.15124e-50	DPB1940	387.86	4.7356e-38	DQB87Y	499.807	3.6693e-26	DPB76I	548.676	2.73669e-12	B97R	584.959	1.70593e-09
DRB96Y	218.094	2.35546e-49	DPB96R	370.918	4.18687e-35	DQB13A	462.558	1.03958e-21	DPB205M	523.776	5.10822e-15	C194V	566.802	5.40228e-11
DRB58F	194.314	3.63718e-44	DQA50L	338.018	4.12269e-33	DPB96K	408.532	4.57132e-17	DPB178M	473.828	6.44371e-16	DPB69E	520.151	1.00284e-11
DQA41K	192.689	8.22892e-44	DPB170T	345.046	5.29548e-35	DQA160D	448.397	2.80729e-24	DQA47K	513.266	8.00514e-16	C114N	555.656	7.47428e-11
DRB74R	196.196	1.41216e-44	DPB65I	349.033	4.15933e-35	DPB178M	459.949	6.17198e-26	DQA.160	553.196	4.6171e-22	DQA69T	623.409	5.32165e-17
DQB57S	194.426	3.43796e-44	DQB185T	334.333	2.78953e-32	DPB55E	460.995	2.20242e-29	DRB71E	507.865	7.58764e-12	DPB57E	540.268	1.25302e-08
DPB55D	236.552	2.22074e-53	DQB86G	403.896	2.81438e-38	DQB66D	500.254	9.58513e-23	DQA160S	562.139	3.6411e-15	B4F	601.784	3.04584e-10
DQA.13T	207.208	5.58613e-47	DPB69K	370.773	1.88217e-37	DQA107T	517.837	7.60111e-34	DQB.18V	559.253	1.23036e-10	A74D	593.821	4.11636e-09
DPB9Y	215.586	8.30441e-49	DQA41R	380.03	1.20961e-37	DQA47K	476.451	9.28929e-23	DRB85V	539.202	2.34582e-15	C90A	573.487	4.76001e-09
DQA.6M	207.208	5.58613e-47	DPB36A	363.157	8.68427e-36	DQB140A	455.441	7.50732e-22	DPB205M	541.133	2.10351e-20	C303A	593.464	4.68875e-13
DPB65I	202.759	5.22013e-46	DQB9Y	363.318	8.54499e-37	DQA160S	458.896	1.42156e-22	DQA34E	524.185	6.46832e-16	C9D	578.184	2.0057e-13
DRB.1S	195.065	2.49352e-44	DQA53Q	350.888	9.25567e-36	DPB96R	484.308	7.31515e-31	DRB58A	524.086	2.84585e-10	DPB11G	552.537	9.61118e-08
DRB70R	234.268	6.99048e-53	DPB65I	409.282	5.94745e-40	DPB170T	498.126	4.27102e-21	DRB86G	560.312	3.12559e-15	DQA138T	613.544	2.96275e-13
DPB96K	220.488	7.0801e-50	DQA160D	402.636	1.64596e-41	DQB185T	537.888	2.90829e-31	DQA175E	574.496	1.44419e-09	C156R	606.29	1.71394e-08
DQA53G	195.65	1.85834e-44	DQA1E	351.091	1.12166e-35	DPB205M	410.378	1.36289e-14	DPB170I	531.47	3.64841e-28	C304M	566.182	3.82159e-09
DPB96K	233.318	1.12645e-52	DRB149H	401.999	1.4365e-38	DQA50L	512.719	6.81503e-26	DQA.6T	548.13	2.67027e-09	B245A	588.399	2.21291e-10
DQA34E	199.469	2.72773e-45	DQA207M	338.536	4.25782e-32	DPB205V	453.835	6.76709e-27	DPB8L	519.847	4.48284e-16	DQA160D	563.78	3.39726e-11
DRB58L	194.842	2.78897e-44	DPB65I	336.64	1.07668e-32	DQA47K	438.794	5.13821e-24	B171H	496.359	3.26893e-14	DPB8L	554.028	3.10235e-14
DPB9H	201.561	9.5328e-46	DQB167R	370.89	1.0366e-38	DPB55E	453.744	8.83583e-20	C97R	501.994	3.75122e-12	B9H	544.386	7.47223e-11
DPB55A	258.487	3.66709e-58	DQA.6M	427.145	1.45336e-38	DQB38A	547.734	4.69937e-28	DRB58L	590.98	4.82841e-11	B94I	632.561	1.13097e-10
DPB9Y	253.024	5.69235e-57	DRB74L	406.232	3.449e-35	DQB140A	507.841	6.76468e-24	DQA207V	551.355	4.20864e-11	C21H	582.411	2.50774e-08
DPB69K	204.813	1.86073e-46	DRB10T	368.814	1.51149e-37	DRB58S	469.195	1.25728e-23	DQB87Y	523.671	1.57342e-13	C99F	559.16	2.5649e-09
DQB28S	195.174	2.36103e-44	DPB35L	321.559	2.53268e-29	DQA207V	420.436	2.68567e-23	DQB9F	487.462	2.68051e-16	DPB9H	534.894	5.69428e-12
DRB.1S	195.065	2.49352e-44	DPB84D	335.392	2.25757e-32	DQA69L	429.988	2.33551e-22	DPB76I	490.082	9.04426e-15	C73A	543.153	3.21624e-13
DPB205V	213.961	1.87813e-48	DQB.10S	379.814	5.95743e-38	DRB58S	479.287	1.9881e-23	DPB57A	537.485	2.3707e-14	DQB71T	572.537	3.21015e-09
DRB58D	195.065	2.49352e-44	DPB9Y	349.515	1.84698e-35	DQB.27A	450.262	1.04487e-23	DRB28E	516.681	3.6453e-16	B116S	556.838	2.34421e-10
DQA215F	199.928	2.16539e-45	DRB38V	355.648	9.74902e-36	DPB65I	487.461	1.64359e-30	DPB76M	548.142	6.71096e-15	C90A	591.887	3.74087e-11
DPB96R	230.452	4.75062e-52	DQA1K	380.212	1.95625e-34	DQA138I	474.591	2.6054e-22	DQB.10A	549.235	5.63697e-18	DPB8L	602.453	2.98501e-13
DQB9L	194.426	3.43796e-44	DPB35F	334.056	3.20653e-32	DRB13S	437.715	2.40319e-24	DQB74S	488.275	1.15592e-12	DRB57D	527.758	3.30951e-10
DQB860	194.426	3.43796e-44	DPB205V	340.994	9.75342e-34	DQB.18V	454.498	1.67373e-26	DRB70R	492.786	6.10152e-10	A97R	522.11	6.12508e-08
DPB8L	256.013	1.26951e-57	DQA160A	425.643	8.91292e-39	DQB136E	550.236	6.24774e-29	C116Y	592.526	7.86913e-11	DPB76V	629.778	1.03809e-09
DQB28S	195.266	2.2545e-44	DPB55A	353.836	2.32284e-36	DRB67F	468.422	9.69527e-27	DPB1780	517.125	2.9779e-12	B12M	555.291	6.49913e-10
DRB60Y	204.935	1.74942e-46	DQA53G	353.942	2.85837e-34	DPB8L	463.949	9.76393e-26	DPB215I	507.897	3.37191e-11	B171H	539.461	1.93e-08
DQA.7V	202.904	4.85332e-46	DPB11G	399.082	1.42558e-44	DQB9Y	504.92	8.0023e-25	DQB224Q	548.987	3.17385e-11	C116S	584.418	2.64254e-09
DRB30H	207.676	4.41435e-47	DQB71T	323.994	4.0485e-27	DPB35F	405.181	2.05413e-19	DRB233T	439.248	5.32389e-09	DPB11G	472.151	9.68864e-09
DQA47K	192.689	8.22892e-44	DPB1940	379.143	1.89034e-42	DQA53G	504.506	4.23741e-29	DPB11G	569.648	6.97059e-16	DQB2030	608.688	4.15093e-10
DPB11G	198.464	4.5194e-45	DQB116V	381.478	1.06475e-41	DQA1K	482.267	1.02348e-23	DQA25F	542.38	8.95507e-15	DPB1780	585.992	4.00366e-11
DQA207V	194.916	2.68747e-44	DQA47K	350.155	1.24143e-35	DPB76I	440.957	1.588e-21	DPB84G	511.75	3.96672e-17	DQB185T	544.047	1.32348e-08
DRB9K	195.065	2.49352e-44	DPB1940	315.393	5.36187e-28	DQA138I	411.253	1.23309e-22	DPB76I	480.2	1.01137e-16	DQB.10S	544.094	1.31339e-15
DQB70T	194.426	3.43796e-44	DPB84D	350.234	9.32339e-36	DQA47K	460.9	7.00402e-26	DQB70R	533.303	1.75462e-17	DPB57D	593.166	1.0166e-14
DQB.27A	196.082	1.49576e-44	DQA53G	353.579	3.98622e-36	DPB55D	431.531	1.05565e-18	B94T	480.784	2.24975e-12	DPB35F	528.312	5.42458e-12
DRB26Y	195.353	2.15766e-44	DQB30Y	327.406	1.4568e-30	DPB205V	441.217	1.43304e-26	C16G	489.847	3.09103e-12	DPB960	531.449	1.11897e-10
DQB38A	187.899	9.14227e-43	DPB69K	341.334	3.07699e-35	DPB170T	394.185	3.59784e-13	A152E	441.181	7.11422e-12	DRB10T	482.843	1.08479e-10
DQB.10S	194.426	3.43796e-44	DQB182S	334.586	2.45589e-32	DPB69K	443.776	1.47487e-25	DQA.160	513.008	8.75071e-17	DPB9Y	562.297	2.20901e-12
DPB76V	222.511	2.56258e-50	DRB58L	376.714	2.09088e-35	DQB203I	488.073	4.937e-26	C24A	546.635	1.97e-14	DPB960	582.731	1.87855e-09
DRB.16A	206.042	1.0033e-46	DPB76V	353.51	6.19944e-34	DQB185I	450.079	8.62186e-23	DPB9H	515.874	5.00181e-16	B158A	544.917	7.07983e-08
DRB74L	195.714	1.79986e-44	DPB57E	331.779	1.93094e-31	DQA138T	427.271	1.48494e-22	DQB.18V	496.998	6.80973e-17	C14R	536.278	3.67127e-10
DQB60N	194.426	3.43796e-44	DQB30Y	329.411	3.32696e-31	DPB205M	403.576	7.18602e-18	DPB170T	465.954	2.83452e-15	C116S	505.192	3.75129e-10
DRB71A	194.781	2.87661e-44	DPB170T	331.323	1.51872e-31	DQA.7V	427.161	1.24627e-22	DPB84D	494.287	2.54705e-16	DQB53L	556.121	3.73761e-15
DQA.7V	198.47	4.50529e-45	DQB.18A	350.269	7.00985e-35	DPB9Y	474.866	6.23568e-29	C306V	508.789	5.7349e-09	DRB74A	543.117	4.65668e-09
DQA187A	196.299	1.34149e-44	DRB670	352.715	6.86506e-36	DPB36A	429.712	1.71239e-18	DQB70G	479.387	1.81469e-12	DPB178M	522.104	6.3261e-11
DPB65I	250.37	2.15693e-56	DQA160A	408.71	2.60797e-36	DQB224Q	473.195	9.72605e-16	DPB76V	522.282	2.44924e-12	DQA175E	571.528	2.25782e-12
DPB55D	191.387	1.58355e-43	DQB87Y	343.669	5.49698e-35	DQB30H	423.761	3.57439e-19	DQA.7M	517.473	3.64918e-22	DPB170T	561.895	2.64685e-11
DPB215I	197.673	6.72453e-45	DQA25F	340.609	6.06931e-33	DRB74L	419.504	6.54965e-19	DRB13G	466.389	7.52928e-12	C275E	504.849	5.58972e-10
DPB1940	212.422	4.06891e-48	DQA47K	388.536	3.41966e-40	DQA34E	494.897	6.14359e-25	C114D	544.909	1.52815e-12	DQA207M	592.203	6.11058e-12
DPB55D	262.427	5.07453e-59	DQA207M	421.081	2.22758e-36	DRB71R	514.676	3.87267e-22	DQB30Y	572.065	3.57511e-14	DPB96K	610.771	4.92676e-10
DQA53Q	163.823	1.65362e-37	DPB57D	261.318	5.39992e-23	DQA34E	351.607	2.05746e-21	DPB205M	420.798	8.93609e-17	DQA138T	489.763	1.00273e-16
DRB74R	195.549	1.95507e-44	DRB86G	335.746	2.41134e-32	DPB55E	435.7	1.55924e-23	DQA40E	485.701	1.53717e-12	DPB69E	528.888	4.973e-11
DRB11P	205.319	1.4429e-46	DPB11G	333.379	1.08904e-29	DPB84G	449.264	5.03689e-27	DQA.6T	540.94	1.02077e-21	DQB224Q	601.097	8.75953e-15
DQA69T	207.208	5.58613e-47	DPB65I	344.533	1.0235e-31	DQA560	471.283	2.10767e-29	DPB170T	542.49	3.21594e-17	DQB203I	599.515	4.30315e-14
DQB9L	194.426	3.43796e-44	DPB55A	346.354	6.57074e-35	DQA53Q	445.315	2.57492e-23	DRB11V	516.659	3.00035e-17	B177D	552.155	2.55539e-09
DPB65I	262.706	4.41184e-59	DRB11P	451.527	5.75169e-43	DQA25F	581.054	5.19967e-30	DQB55R	633.597	4.20907e-13	C219R	667.158	6.90569e-09
DQA.7V	179.602	5.92077e-41	DPB215I	340.157	8.55793e-37	DPB960	409.72	7.39978e-17	DQB55P	459.817	1.46317e-12	DPB76M	493.06	8.13345e-09
DQB30Y	205.89	1.08274e-46	DQB.18V	343.246	1.0083e-31	DPB57D	440.841	5.13131e-23	DPB194Q	522.331	1.76161e-19	DRB73G	566.61	2.84829e-11
DRB58L	218.094	2.35546e-49	DQA138I	320.892	3.71264e-24	DPB55A	418.513	5.06512e-23	DPB170T	487.646	9.20256e-17	DQA25F	545.238	3.22579e-14
DPB11G	203.797	3.0998e-46	DQB.18A	377.913	9.33911e-40	DRB.16V	462.354	3.95775e-20	DQA.16L	524.411	3.33619e-15	C116F	570.624	1.06089e-11
DPB9Y	253.94	3.59276e-57	DQA.7V	428.946	5.97154e-40	DQB70E	550.485	2.91097e-28	DQB130R	603.112	4.03361e-13	DPB194R	642.904	2.82548e-10
DPB69K	241.411	1.93623e-54	DRB58D	404.27	2.68557e-37	DQA1E	496.976	6.06908e-22	DQB197S	579.904	8.50843e-20	C66K	617.876	7.17602e-10
DPB96R	261.813	6.90658e-59	DQB70E	417.52	9.81284e-36	DQA52R	521.881	1.68618e-24	DQA53G	568.094	1.06067e-11	A299T	603.783	2.31474e-09
DPB194R	208.492	2.92938e-47	DRB96H	376.435	2.08262e-38	DQA.16M	492.116	5.58108e-27	DQB38A	551.987	1.01277e-14	DQA.7M	580.336	1.01306e-07
DQB70T	194.426	3.43796e-44	DRB96H	309.593	7.23538e-27	DPB69E	387.445	1.11009e-18	DQA160S	455.144	1.9055e-16	DPB96R	506.149	9.2105e-13
DRB85V	217.154	3.77793e-49	DPB96K	364.443	6.78364e-34	DQB140T	464.736	1.31424e-23	C116S	510.461	1.36071e-11	DQA138I	554.258	3.64327e-11
DPB170I	246.948	1.20148e-55	DQB26G	411.991	8.95423e-38	DQA69T	530.383	1.42273e-27	DRB74L	562.413	1.518e-08	B163E	594.919	1.1886e-08
DQB860	194.426	3.43796e-44	DPB69K	335.908	1.26235e-32	DQA.13A	435.966	1.48013e-23	DPB178L	495.517	1.19122e-14	DPB57A	545.489	1.56017e-12
DRB58N	206.343	8.62499e-47	DPB69K	375.464	1.15108e-38	DQA215F	458.336	8.75464e-20	DRB67F	514.002	8.59033e-14	DQB57V	554.119	2.39145e-10
DRB30H	207.769	4.2131e-47	DQB28S	311.892	1.90163e-24	DPB178L	395.473	6.11405e-20	DRB78V	447.862	4.55455e-13	DPB205M	485.381	9.04891e-10
DQA130S	207.208	5.58613e-47	DPB1780	358.317	9.9213e-35	DQA175E	482.375	8.18025e-29	DPB76M	555.588	1.16382e-17	DQB26L	598.495	5.73993e-11
DQA560	193.165	6.47889e-44	DPB57E	307.108	1.34123e-26	DQA.6T	404.767	4.96986e-23	DPB35L	445.656	1.61133e-10	DQB26L	497.042	7.5876e-13
DQB.27S	194.426	3.43796e-44	DQB9Y	326.958	1.14464e-30	DPB205M	386.072	1.48778e-14	DPB65I	506.921	4.1243e-28	DQA47K	547.551	1.83914e-10
DRB58D	195.065	2.49352e-44	DQA.13T	352.325	4.49095e-36	DPB9Y	407.684	1.00398e-13	DPB57A	456.284	3.1395e-12	DPB170T	521.128	8.10764e-16
DQA.13T	166.426	4.46548e-38	DPB35F	283.209	3.20228e-27	DQA.6T	382.909	1.77354e-23	DPB205V	449.849	2.79846e-16	DQA160A	508.811	1.60776e-14
DPB9Y	233.457	1.0509e-52	DQA207M	390.802	4.30257e-36	DQA.16L	484.653	3.40149e-22	DRB67I	537.822	3.05985e-13	C21H	566.036	1.08611e-07
DQA47K	192.689	8.22892e-44	DPB1940	365.718	1.61294e-39	DQA175E	462.019	9.87168e-23	DRB74A	521.769	1.07672e-14	C219W	560.968	3.82802e-10
DRB38V	210.191	1.24784e-47	DPB178L	381.032	4.84704e-39	DQA107T	514.432	7.39102e-31	DPB76I	566.389	5.6736e-13	DQB57A	613.234	7.68445e-12
DRB71A	210.15	1.27369e-47	DQB167R	334.742	6.25342e-29	DPB69E	419.092	4.1449e-20	DQA175E	486.591	2.10719e-16	DPB76V	523.663	1.13868e-09
DPB215I	199.74	2.37973e-45	DRB71E	370.994	3.93795e-39	DQB70R	473.87	3.56838e-24	DQA41K	522.66	2.84912e-12	B67S	579.226	5.43324e-14
DQA26S	194.252	3.75132e-44	DQB.18V	292.839	3.11163e-23	DPB35L	369.503	2.02681e-18	DQB74S	434.87	6.21674e-16	DRB11L	468.239	7.62166e-09
DPB69K	244.815	3.50591e-55	DQA.6T	409.698	9.70469e-38	DQB71T	513.964	1.76859e-24	B97R	570.025	7.02539e-14	DQA138I	616.792	7.99557e-12
DQA129Q	173.791	1.09965e-39	DPB76I	283.593	1.08288e-25	DPB35L	365.978	1.11967e-19	DRB58A	430.1	1.16972e-15	C66K	489.017	1.64507e-14
DQA.13A	198.47	4.50529e-45	DQB70T	349.826	8.75971e-35	DPB1780	466.495	3.39272e-27	DPB35Y	534.398	1.71703e-16	C116L	571.384	1.18991e-09
DQA11C	204.223	2.50246e-46	DQB77R	349.189	2.18435e-33	DPB55A	433.57	4.08136e-20	DQA69L	478.75	1.79735e-11	B67C	510.203	2.04325e-08
DRB149Q	217.368	3.39168e-49	DQB70R	351.787	4.42533e-31	DPB65I	430.602	6.81851e-19	DQA25F	484.279	2.36417e-13	C114D	521.707	9.48199e-10
DQB116V	167.7	2.35226e-38	DRB74L	288.109	5.14746e-28	DPB65I	375.13	1.07371e-20	DPB205M	452.765	1.23948e-18	DQA69T	509.943	3.98231e-14
DQA187A	202.932	4.78688e-46	DQB70T	356.845	2.41988e-35	DPB65I	461.684	1.32428e-24	DPB1940	530.079	1.33823e-16	DPB960	584.36	1.73752e-13
DPB170I	180.884	3.10701e-41	DQB203V	303.058	2.11474e-28	DQB.27S	395.272	7.78002e-22	DRB96E	458.153	2.19627e-15	DPB205M	513.092	1.24268e-13
DRB96E	207.535	4.73793e-47	DQA25F	346.923	3.62313e-32	DPB57D	478.628	1.73634e-30	DPB205M	553.451	5.14869e-18	DQB66D	593.272	2.78226e-10
DRB57S	196.317	1.32899e-44	DQA.6M	338.931	7.13831e-33	DPB1940	450.078	5.49647e-26	DPB69E	517.609	2.07374e-16	DQB74E	573.309	8.4429e-14
DRB96H	182.534	1.35581e-41	DQA1K	292.034	1.26108e-25	DPB55E	390.642	3.07685e-23	DQB87Y	472.02	1.86428e-19	DPB178M	531.669	1.13403e-14
DQB70T	194.426	3.43796e-44	DQB140T	329.293	3.53067e-31	DPB1780	423.534	2.79347e-22	C275E	491.487	1.67437e-16	DQA.13T	547.286	8.02736e-14
DRB96E	207.579	4.63411e-47	DPB69K	353.097	1.65485e-33	DQB140T	466.073	2.1842e-26	DQA.13A	501.42	2.75889e-09	DRB86V	545.998	2.44487e-11
DQB60N	194.426	3.43796e-44	DQB1970	335.989	1.21149e-32	DPB65I	446.565	7.33118e-26	DPB170T	547.294	1.05446e-23	C103L	595.471	3.8944e-12
DQA50L	203.878	2.97552e-46	DQB136Q	350.421	9.87745e-34	DPB11L	468.852	1.39503e-27	DQA1E	514.218	1.63478e-11	DPB205M	552.319	6.71819e-10
DQB203V	194.55	3.22947e-44	DPB69E	302.711	2.47815e-25	DRB.24F	370.112	2.21551e-16	DRB9W	422.526	4.49612e-13	DPB170T	466.157	3.96478e-11
DRB.16A	208.223	3.35484e-47	DPB36A	349.826	1.18761e-32	DQB116V	489.862	2.61353e-32	B45E	548.763	1.65821e-14	DRB74L	599.83	8.92838e-13
DRB13G	167.546	2.54216e-38	DQB28S	325.414	3.30729e-36	DPB36A	411.846	1.44618e-20	B24S	445.927	5.28701e-09	DPB69E	472.798	2.17448e-07
DPB9Y	261.446	8.3027e-59	DQB.18A	415.587	2.15771e-35	DQA138I	511.936	9.63421e-23	DRB58F	575.988	1.21133e-15	C163T	618.647	6.51854e-11
DQA207V	207.208	5.58613e-47	DPB11G	365.473	2.70851e-36	DPB36A	450.069	3.6602e-20	DQA52R	533.67	6.05264e-20	DRB58Y	586.095	4.46937e-13
DPB205V	203.694	3.26382e-46	DQB860	376.086	2.22231e-39	DQA107T	476.028	1.56947e-23	DRB73A	520.188	3.02467e-11	C49A	565.363	1.80275e-11
DRB233T	231.963	2.22405e-52	DQA207M	344.945	2.17833e-26	DPB69E	453.867	1.68754e-25	DPB84G	568.575	9.12096e-27	DQB125A	625.969	3.56709e-14
DRB11P	194.497	3.31764e-44	DRB85A	292.095	5.12602e-23	DPB35F	357.827	5.1664e-16	DQA53Q	417.117	1.36029e-14	DPB33E	462.279	1.81437e-11
DQB.18A	195.143	2.3979e-44	DPB9H	305.203	9.50708e-26	DQA.7M	403.348	3.88845e-23	DQA75I	480.073	1.96505e-18	DPB178M	543.258	1.88159e-15
DQB70T	194.426	3.43796e-44	DPB76V	313.959	8.00335e-28	DQA129Q	417.172	3.01042e-24	DPB57E	501.467	4.26252e-20	DQA11C	569.925	1.29592e-16
DQA69T	207.208	5.58613e-47	DQB26L	335.121	1.17276e-29	DPB9Y	398.409	1.78539e-15	DPB33E	502.674	1.76977e-24	DQA207M	547.488	2.16673e-11
DRB11L	194.232	3.78985e-44	DQB30H	335.498	1.40727e-32	DPB205M	399.396	1.31065e-15	DPB96K	514.257	8.43711e-27	C304V	570.348	6.91925e-14
DQA50L	196.299	1.34149e-44	DQB9L	351.545	1.23712e-35	DPB178L	430.315	6.9778e-19	DPB84V	492.61	2.95666e-15	DPB57D	542.56	1.57714e-12
DQB9L	194.426	3.43796e-44	DPB36A	303.744	1.38243e-25	DQA.7M	402.278	3.195e-23	DQA53Q	482.687	3.0439e-19	DPB215I	523.195	1.95761e-10
DQA207V	194.916	2.68747e-44	DQA160S	350.155	1.24143e-35	DPB55E	435.637	2.33903e-20	DQB70G	494.341	1.83227e-14	DPB178M	538.251	3.43783e-11
DPB36A	245.46	2.5364e-55	DQB38A	441.164	1.80843e-44	DQB70E	550.148	1.6361e-25	C103L	593.693	4.14283e-11	DQA47K	633.198	3.27362e-10
DQA138I	192.689	8.22892e-44	DPB96K	333.038	2.23329e-32	DQA.7M	431.566	3.20487e-23	DPB84V	501.26	6.92576e-17	DRB11V	562.85	4.22838e-15
DQB56L	194.426	3.43796e-44	DPB9Y	355.942	5.27646e-37	DQA.16L	489.917	5.53304e-31	DQA25F	519.196	6.2669e-08	C35Q	544.346	5.30565e-07
DQA53Q	204.304	2.40285e-46	DPB69E	365.746	5.47596e-37	DQA129Q	476.375	7.1352e-26	DQA1E	539.444	1.99636e-15	B.16V	583.437	3.29471e-11
DPB96R	258.02	4.63623e-58	DRB133R	410.833	4.20906e-35	DQA.13T	540.725	4.32617e-30	DRB86V	580.26	3.22187e-10	DQB30H	608.163	1.2756e-07
DQA1E	192.893	7.42733e-44	DPB65I	312.309	8.49055e-28	DQA.7V	389.847	1.30217e-18	DQB60N	457.1	2.38835e-16	DPB84D	504.336	6.29236e-12
DPB69E	230.41	4.85118e-52	DQB57S	389.187	2.0942e-36	DRB13S	505.392	4.28446e-27	DPB194Q	575.12	6.81016e-17	C304M	619.061	3.3834e-11
DRB30H	210.723	9.55327e-48	DPB69K	356.429	1.50528e-33	DQB57V	447.035	1.75281e-21	DPB1780	519.299	1.88284e-17	DRB13S	580.067	6.42089e-15
DPB170I	206.548	7.77966e-47	DQB.10S	365.475	1.94138e-36	DQA1E	468.094	4.0633e-24	DQA69T	544.898	1.88801e-18	DPB65I	578.281	7.56806e-09
DPB96R	192.716	8.11961e-44	DRB11L	347.694	1.41551e-35	DRB133R	455.667	2.72525e-25	DQA138I	526.15	4.64185e-17	C16G	567.174	1.50377e-10
DQB220R	195.266	2.2545e-44	DPB76V	349.295	2.2819e-35	DQB135D	463.788	1.01612e-26	DPB1780	540.165	2.34382e-18	DQA41K	591.941	6.22176e-13
DPB170I	215.105	1.05731e-48	DRB85A	373.973	1.99966e-36	DQB71T	496.687	1.61036e-28	DQA.7M	540.619	3.39964e-11	C219R	582.149	1.16078e-10
DQA560	201.465	1.00019e-45	DQB60N	341.204	3.03598e-32	DPB84D	420.303	5.90904e-19	DPB76M	468.756	3.38189e-12	DPB96R	525.198	5.78955e-14
DPB96K	200.128	1.95855e-45	DQB28S	370.464	6.24713e-39	DQB53L	485.002	9.93507e-27	DRB13S	544.358	1.31597e-14	DPB84V	583.265	4.44371e-10
DQB203V	194.55	3.22947e-44	DPB57D	310.379	5.18168e-27	DRB74A	368.905	2.00629e-14	DQA.6M	437.232	1.38523e-16	DQA187A	491.506	1.74426e-13
DQA.160	192.689	8.22892e-44	DPB57E	353.91	6.12204e-37	DQB26L	450.807	7.3034e-23	C304V	504.02	2.99299e-13	DQA.6M	544.681	1.81066e-10
DPB9Y	245.473	2.52022e-55	DQB57S	398.303	4.17319e-35	DQB71A	503.91	8.98948e-25	C35Q	551.02	6.71224e-12	DPB69K	594.13	5.17261e-11
DQB203I	196.892	9.95638e-45	DPB76V	357.367	8.9089e-37	DQB57A	468.764	4.8425e-26	A193A	511.822	5.31521e-11	DRB67I	550.325	5.46678e-10
DQA207V	207.208	5.58613e-47	DPB8L	368.173	6.96238e-37	DQA25F	463.002	2.07571e-22	DRB77T	525.62	2.50899e-15	DPB76V	579.233	2.44121e-13
DQA47K	192.689	8.22892e-44	DQB167R	311.674	1.05524e-27	DPB9H	398.702	1.07006e-20	DQA.16M	460.153	4.53886e-15	DPB36A	524.712	9.36728e-16
DPB170T	226.892	2.83898e-51	DQA47K	377.517	1.26571e-34	DQA.6T	472.284	2.14225e-22	DQA160S	539.182	2.85847e-16	DPB76M	592.799	2.43639e-13
DPB96K	264.25	2.03291e-59	DQA26S	434.662	6.01478e-39	DQB70R	514.006	5.21908e-19	C116Y	556.771	6.17281e-11	DQB224Q	590.864	5.25411e-09
DQB9L	194.426	3.43796e-44	DPB84G	332.44	7.23762e-32	DQB26G	437.726	1.05696e-24	DPB9H	500.31	2.5528e-15	DQA52R	550.842	1.17252e-12
DQA26S	206.924	6.44275e-47	DQA34E	361.72	1.55091e-35	DPB69K	484.631	1.45871e-28	DPB57A	554.145	7.58742e-17	DQB30Y	598.127	3.31479e-11
DQA160D	194.916	2.68747e-44	DQB860	351.177	7.4239e-36	DPB36A	450.697	1.94167e-23	DPB65I	509.329	1.90081e-14	A114Q	543.311	5.56433e-09
DRB30H	218.982	1.50803e-49	DPB8L	334.082	7.48323e-27	DRB67F	429.015	1.96975e-22	DPB84V	492.756	1.41901e-15	DRB58S	541.584	2.79357e-12
DRB96Y	207.767	4.21801e-47	DQA75I	358.329	1.30631e-34	DPB76I	471.446	2.03389e-26	DPB55E	520.138	2.99503e-12	DPB178M	570.704	1.1521e-12
DRB78Y	207.676	4.41435e-47	DPB9Y	376.269	1.50163e-38	DQA75I	509.731	7.16506e-31	DPB55E	582.042	1.8378e-17	B70Q	620.53	5.51002e-10
DQA69T	194.916	2.68747e-44	DQB.27S	351.177	7.4239e-36	DPB57E	435.008	5.39005e-20	DPB194Q	492.998	2.63375e-14	DPB76M	568.701	3.29683e-18
DQB.27S	194.426	3.43796e-44	DPB9Y	328.662	4.85074e-31	DQB57D	437.804	1.51077e-25	DQA25F	487.141	2.15592e-12	C66K	523.473	1.6636e-09
DQB9F	195.125	2.41915e-44	DQA69T	351.656	6.48299e-36	DPB9Y	463.9	3.15905e-26	DPB170T	503.826	2.63812e-10	C97R	544.438	1.85602e-10
DQB203V	198.369	4.73906e-45	DQA207V	353.621	1.23336e-35	DPB170I	450.826	6.25368e-23	C156W	486.798	2.00178e-09	DQA160A	516.578	4.83885e-08
DPB55D	210.786	9.25603e-48	DQB57S	370.927	1.05365e-36	DRB67L	453.273	1.14243e-19	DQB70E	495.55	7.92421e-11	C156W	539.654	3.11331e-11
DQB57S	194.426	3.43796e-44	DPB96R	296.548	5.21979e-24	DQA175E	384.63	6.28059e-21	DPB194R	438.482	2.16164e-13	DRB11P	478.483	2.5387e-10
DPB65I	226.114	4.1956e-51	DQA.7M	369.881	3.99484e-33	DQA52R	526.567	5.99673e-36	DRB11L	572.261	1.38204e-11	C152E	614.451	8.28436e-11
DPB11G	232.241	1.93441e-52	DQA160S	402.565	6.2887e-39	DRB233T	514.078	4.56659e-26	DRB11P	565.581	7.14831e-13	DPB57A	601.455	2.10543e-09
DPB84D	292.606	1.34492e-65	DQA160S	455.855	2.20765e-37	DQA50L	576.796	3.93591e-28	C77N	609.745	9.46075e-09	DQA25F	646.998	1.03739e-09
DQA41K	192.689	8.22892e-44	DQA175E	318.779	2.9396e-29	DPB170T	402.776	4.9552e-20	DPB55A	457.784	1.20017e-13	DPB57D	510.572	3.71472e-13
DRB670	195.065	2.49352e-44	DRB57D	338.951	3.76228e-33	DPB69E	433.896	1.95823e-22	DPB178L	526.705	5.75677e-22	DQB74S	566.625	2.64677e-10
DQA53G	202.932	4.78688e-46	DPB36A	358.006	1.34901e-35	DQB57S	486.149	1.04441e-29	DRB70R	515.869	4.99075e-08	A77N	545.533	5.13908e-08
DPB8V	256.553	9.68282e-58	DRB11L	416.549	1.13373e-36	DQA1K	511.441	2.01026e-22	DQB70E	575.361	1.29565e-15	DQA75I	606.877	1.97797e-08
DQA160D	207.208	5.58613e-47	DPB9Y	332.995	3.42272e-29	DQA207M	434.754	6.26959e-24	DQB125A	506.868	2.03158e-17	DPB35L	547.681	1.67463e-10
DPB96K	231.927	2.26484e-52	DQB860	386.246	1.9731e-35	DQA1E	481.427	1.7373e-22	DQA207M	544.66	1.83622e-15	C116S	597.535	3.55587e-13
DQA.7M	207.208	5.58613e-47	DPB69K	352.657	1.71244e-33	DQA.16M	461.58	1.68732e-25	DQA41K	513.101	7.08437e-13	DPB57A	559.407	1.0117e-11
DQA69T	192.247	1.02754e-43	DPB69K	343.471	9.36478e-35	DQB1970	474.902	1.99276e-30	C156L	522.445	5.38131e-12	DQA1K	563.381	1.57288e-10
DQB135D	153.174	3.51021e-35	DQB70R	236.184	8.16309e-20	DQB60N	296.738	7.15814e-15	DPB1780	343.493	8.04396e-12	DQB87F	388.371	2.09735e-11
DQB70E	195.143	2.3979e-44	DQA160A	351.86	5.90189e-36	DPB35F	456.412	1.53132e-24	DPB960	520.357	1.27919e-15	DQB26G	558.564	6.36408e-10
DRB26Y	195.198	2.33206e-44	DPB55D	357.333	3.86587e-37	DQB9Y	456.404	2.43565e-23	DPB9Y	518.306	3.61111e-15	C97R	576.238	2.7123e-14
DPB57D	257.847	5.05717e-58	DRB57S	411.782	2.39239e-35	DQA.6M	518.079	6.34713e-25	C156L	566.368	3.6788e-12	DRB233T	612.261	1.24888e-11
DPB76M	248.352	5.93951e-56	DQB.27S	411.222	2.66988e-37	DQB130R	531.214	6.35222e-28	C306V	570.512	3.63824e-10	DQA138I	613.579	5.29044e-11
DQA129H	204.444	2.23906e-46	DQA560	356.729	5.49077e-35	DPB1940	462.993	6.45357e-25	DPB57A	535.837	1.40313e-17	DQA160A	577.032	1.37752e-10
DPB205V	223.89	1.28238e-50	DRB38L	396.817	1.69711e-39	DQB86A	472.158	3.9617e-18	DQB.18A	527.286	1.12921e-13	C156R	580.455	3.06118e-13
DQB9L	194.426	3.43796e-44	DPB205V	333.244	4.82682e-32	DQA1K	445.067	3.90779e-26	DQB.10A	516.197	3.344e-17	DPB96R	580.261	1.20453e-15
DPB96K	217.843	2.67237e-49	DQB57D	381.338	1.95019e-37	DQA47K	504.793	1.10885e-28	C194V	577.421	1.56516e-17	DQA25F	619.82	7.4419e-11
DQB197S	198.118	5.37638e-45	DPB76V	344.344	1.15853e-33	DQB70T	454.464	9.22503e-26	DQA207M	494.421	2.59565e-10	A163T	523.489	6.98862e-08
DQB30Y	202.651	5.51368e-46	DPB9Y	330.023	1.53999e-29	DQA.13A	413.535	6.33289e-20	DPB57A	477.649	1.17433e-15	DRB11L	516.566	4.42193e-10
DRB71E	187.101	1.36512e-42	DQB167R	326.08	4.45018e-32	DQA25F	384.325	2.31448e-14	DPB76M	444.777	7.53852e-15	DPB960	497.889	3.15078e-13
DQA160D	192.893	7.42733e-44	DPB84D	337.154	3.11517e-33	DQB140T	457.869	4.4123e-28	DPB65I	522.478	9.13468e-16	DQA130S	566.601	3.0831e-11
DQA.7M	194.916	2.68747e-44	DQB860	351.177	7.4239e-36	DPB65I	484.847	6.45235e-31	DQB87Y	537.017	5.08849e-13	B74D	579.81	6.08544e-11
DQA160D	207.208	5.58613e-47	DPB35F	333.021	3.3778e-29	DQA.7M	442.905	1.03897e-25	DQB55P	516.249	1.08942e-17	C00	580.181	1.28737e-15
DQB57D	199.763	2.35232e-45	DPB9Y	366.428	3.95897e-38	DQA138I	482.062	5.71787e-27	DQA52R	525.486	4.40601e-11	C.180	556.966	2.01593e-08
DQA.7M	207.208	5.58613e-47	DPB9H	363.857	6.10567e-36	DQB70R	475.526	4.22359e-26	DPB55E	550.466	4.85232e-18	C77S	602.397	5.74586e-13
DPB9H	202.394	6.27134e-46	DRB96Y	365.96	1.88219e-37	DQB.10A	480.016	1.26648e-26	DQA40E	536.593	5.40634e-14	C.18R	566.008	5.83959e-08
DRB51R	194.89	2.72261e-44	DPB57D	331.67	1.34718e-31	DPB35L	420.966	3.39881e-21	C295A	475.82	1.29864e-13	DRB71R	522.692	7.57601e-12
DPB57E	240.632	2.8633e-54	DQB.10S	403.947	2.13532e-37	DQB140A	490.323	1.48799e-20	DRB58D	541.61	7.9786e-13	C163T	575.558	5.66206e-09
DQA53G	178.947	8.22951e-41	DPB65I	309.771	2.70498e-30	DQA160D	408.418	3.01879e-23	DQA.7M	483.167	5.34304e-18	DPB84D	523.208	2.48796e-10
DQB.18A	195.143	2.3979e-44	DPB96R	372.453	1.87434e-40	DQA.7V	474.215	6.25804e-24	DQA160S	534.482	8.28287e-15	DRB70Q	569.673	2.98901e-09
DRB51R	194.461	3.37731e-44	DPB65I	336.852	7.98899e-33	DQA.16M	444.418	3.34529e-25	DQA.160	495.504	8.83982e-13	DRB71R	541.185	1.39215e-11
DQA160D	207.208	5.58613e-47	DPB1780	366.886	1.33016e-36	DQB126Q	479.964	2.07467e-26	DQA129Q	534.15	1.82397e-13	C138K	554.804	5.50271e-06
DQA130S	194.916	2.68747e-44	DQB57S	351.177	7.4239e-36	DPB36A	488.734	9.10962e-32	DPB205V	545.605	4.65231e-14	DQA187A	592.734	6.64703e-12
DQA.6M	194.916	2.68747e-44	DPB11G	363.875	1.2489e-38	DQB57S	503.304	3.5494e-32	DQA215F	535.066	1.74232e-08	DPB8L	560.324	5.01482e-07
DPB65I	251.744	1.08211e-56	DQB860	420.3	1.52953e-38	DRB70D	532.886	2.65828e-26	DQA11Y	585.93	3.2619e-13	C24A	632.932	7.09173e-12
DQA207V	194.916	2.68747e-44	DPB76M	307.034	3.36731e-26	DPB8L	421.544	1.00747e-26	DQA25F	509.214	7.73201e-21	DQA130S	590.639	1.82107e-19
DQA138I	192.689	8.22892e-44	DQA160A	314.985	1.98896e-28	DPB65I	396.152	2.07412e-19	DRB47F	447.733	6.87169e-13	DPB55E	488.431	1.77632e-10
DRB74E	218.182	2.25426e-49	DPB9H	369.347	9.64535e-35	DQA175E	466.44	6.61233e-23	DQA50L	518.555	5.23581e-13	DPB69E	556.352	7.84845e-10
DPB11G	264.264	2.01923e-59	DRB71A	425.819	5.17359e-37	DQA207M	516.706	1.52146e-21	DQA.13A	580.754	1.21395e-15	C.170	613.558	1.01924e-08
DQB220R	170.041	7.24793e-39	DQA25F	313.334	5.07215e-33	DPB69E	431.701	1.44093e-27	DPB178M	500.097	1.33725e-16	DQA41K	534.32	4.91424e-09
DRB70R	199.088	3.30291e-45	DQB130R	329.47	3.37934e-30	DPB69E	398.193	1.13329e-16	DRB74A	445.18	7.14547e-12	DRB58D	478.157	9.32537e-09
DPB55A	192.313	9.94171e-44	DRB57D	322.331	4.06022e-30	DQB66D	392.61	5.15028e-17	DQB9F	450.691	2.51524e-14	DQB56P	510.838	8.80119e-15
DQB60N	194.426	3.43796e-44	DQB26L	319.885	4.03842e-29	DPB65I	403.44	6.19761e-20	DQA47K	473.225	6.61373e-17	DQB224Q	519.768	8.95901e-12
DPB57D	265.029	1.37494e-59	DRB51R	431.023	5.54955e-38	DRB31I	503.868	1.40254e-17	C49A	552.922	2.49024e-12	DQB135D	590.905	7.13345e-10
DQA.6T	192.689	8.22892e-44	DQB26G	291.781	2.41091e-23	DQA26S	362.389	4.35721e-17	DPB194R	428.44	4.3937e-16	DPB96R	459.55	2.4386e-08
DQB70T	194.426	3.43796e-44	DPB960	319.641	4.56704e-29	DQA53G	406.795	1.00381e-20	DPB215I	475.424	1.18852e-16	DQB86A	524.103	3.01532e-12
DQA47K	192.689	8.22892e-44	DQB70E	320.215	1.42538e-29	DPB69E	409.087	4.21281e-21	DPB36A	470.966	3.65108e-15	DQA160D	503.773	1.01777e-08
DPB36A	202.239	6.78156e-46	DQB30Y	380.692	1.05467e-40	DQB60N	494.588	1.37357e-26	DPB76V	552.699	2.47627e-14	DQA.7V	608.487	8.07551e-14
DQB136E	194.426	3.43796e-44	DPB96R	339.253	2.34258e-33	DRB71R	441.922	3.96169e-24	DQA.7V	511.659	6.77557e-17	B65Q	545.483	6.03301e-09
DPB69E	196.786	1.04994e-44	DQB135D	340.068	5.10114e-33	DQA69T	426.971	1.13991e-20	DRB60Y	499.061	2.05587e-17	DPB76V	551.414	4.63536e-13
DQA41K	192.689	8.22892e-44	DPB76I	327.617	3.42429e-31	DQB.18A	445.587	1.76023e-27	DRB9E	486.195	1.86038e-10	A17R	521.268	3.17643e-09
DPB170I	212.542	3.83053e-48	DRB10T	376.799	1.32935e-37	DQB116V	480.695	2.13242e-24	DQA160D	536.176	9.43808e-14	B67F	578.612	7.30249e-11
DPB55D	216.633	4.90747e-49	DRB96H	396.825	4.40132e-41	DQB57D	506.084	1.42344e-25	DPB76I	563.612	3.33338e-14	C94I	607.524	3.43388e-11
DPB205V	254.217	3.12726e-57	DQB.18A	415.797	5.11096e-37	DQB140T	514.706	2.64377e-23	C116Y	556.973	7.96194e-11	DRB58Y	598.173	1.37388e-10
DPB84D	193.076	6.77691e-44	DQA175E	323.58	3.17899e-30	DQB9Y	408.942	2.48331e-20	DQB87F	494.095	2.76148e-20	DQA129Q	543.436	2.15135e-12
DRB.16A	196.312	1.33267e-44	DPB76M	340.044	4.06651e-33	DQA107T	470.513	3.2345e-30	DQB167R	515.004	2.55564e-11	C303A	548.65	6.60993e-09
DQA138T	207.208	5.58613e-47	DQB30H	356.759	2.1729e-34	DPB96R	478.572	2.53667e-28	DPB11G	552.142	9.70992e-18	B116Y	592.949	1.68091e-10
DQB57S	194.426	3.43796e-44	DQB30Y	335.469	1.57433e-32	DPB11G	459.781	7.19836e-29	C21H	519.98	8.57348e-15	DRB96H	561.096	1.43507e-10
DRB47F	194.179	3.892e-44	DQA40E	312.84	1.24264e-27	DPB170I	409.114	1.0003e-22	DPB194R	451.339	8.13403e-11	DPB205M	516.156	8.2202e-16
DPB170I	201.722	8.79053e-46	DQB57S	360.478	2.11615e-36	DQA25F	472.55	3.44511e-26	DPB205M	538.579	4.444e-16	DQA129Q	580.8	8.15289e-11
DPB76M	275.551	7.00028e-62	DQA1E	451.784	3.22091e-40	DQA47K	541.364	2.94474e-21	C163T	598.896	3.32605e-14	DQA69T	638.823	2.63541e-10
DRB.1S	195.065	2.49352e-44	DQB126Q	326.813	1.69915e-30	DPB205M	415.169	5.4648e-21	DPB170T	472.735	3.2695e-14	C77N	528.068	1.01735e-13
DPB36A	291.955	1.86468e-65	DRB26Y	462.743	4.97701e-39	DQB30Y	574.799	3.4747e-26	C77N	618.405	4.01524e-11	DQA1K	663.038	2.37627e-11
DRB74L	214.68	1.30893e-48	DPB76V	362.352	5.5947e-34	DQA26S	483.571	3.42247e-28	DPB170T	563.237	4.43369e-19	DQA160D	600.291	1.14861e-09
DQB60N	194.426	3.43796e-44	DPB65I	342.923	3.69383e-34	DQA53Q	474.15	2.20877e-30	DPB35Y	533.266	1.48657e-14	DQA160A	573.601	2.13911e-10
DPB205M	187.929	9.00244e-43	DQA160A	352.503	1.13353e-37	DQB9F	465.723	1.93055e-26	DQA.7V	518.666	3.4338e-13	DPB69K	569.401	1.0576e-12
DQA1K	192.689	8.22892e-44	DPB65I	358.158	7.22704e-38	DQB70R	469.759	4.36931e-26	B12M	545.795	2.78545e-18	DQA160S	597.398	6.79481e-13
DQB.27S	194.426	3.43796e-44	DQA107T	318.801	6.97384e-29	DPB11G	418.286	1.9764e-23	DPB84D	478.565	8.23269e-15	DQA.6T	529.579	9.17071e-13
DRB77T	203.744	3.18296e-46	DPB76V	324.119	5.2361e-28	DRB28E	391.956	1.77591e-16	DPB76I	439.198	6.27478e-12	DQB57D	470.679	2.01352e-08
DQA138T	207.208	5.58613e-47	DQA75I	361.443	2.05729e-35	DPB76V	489.364	1.16809e-29	DQB197S	533.118	3.72321e-11	B77D	577.541	2.64588e-11
DPB69E	219.802	9.99062e-50	DQB182S	392.267	2.14206e-39	DQB185I	511.757	8.17888e-28	C99F	561.267	1.97389e-12	DQA130S	602.993	1.04983e-10
DQA26S	194.94	2.65508e-44	DQA215F	350.954	8.40837e-36	DPB8L	466.534	5.87325e-27	DQB86G	501.182	3.94939e-09	C77N	537.156	2.0003e-09
DPB96K	263.147	3.53595e-59	DRB58F	436.212	1.58438e-39	DQA138T	564.045	1.22066e-29	DPB205V	598.92	3.51607e-09	DQA130S	631.949	9.07974e-09
DPB11G	197.99	5.73509e-45	DQB86G	360.03	4.05385e-37	DQA41K	457.897	4.47511e-23	DQB.10A	539.543	1.62781e-19	DPB194R	592.331	3.71452e-13
DRB57S	187.223	1.28405e-42	DQB37Y	318.94	1.72518e-30	DPB35L	429.564	7.15271e-26	DPB178M	491.587	3.39453e-15	DRB74L	533.999	7.39366e-11
DQA1K	192.689	8.22892e-44	DQB167R	302.803	9.25214e-26	DPB178L	387.856	2.90562e-20	DQA207M	447.801	9.75383e-15	DQA138I	496.461	3.04385e-12
DQB56L	194.426	3.43796e-44	DQB71T	339.985	1.62122e-33	DPB170T	434.07	3.02204e-22	DPB76V	487.016	3.42799e-13	DRB30Y	530.594	4.07344e-11
DQB.270	168.553	1.53202e-38	DQA69T	276.311	3.03606e-25	DPB35F	382.493	6.72742e-25	DPB205V	438.566	6.98366e-14	DRB74L	487.487	2.66508e-12
DPB205V	200.654	1.50319e-45	DQA41K	362.143	5.35019e-37	DQB167R	478.631	3.71711e-27	C2750	533.09	1.58727e-13	DQA160S	577.032	3.38205e-11
DQB2030	188.32	7.39732e-43	DPB1780	343.01	1.63666e-35	DQA69T	393.624	1.12399e-12	DQB70E	461.605	1.65155e-16	DPB69E	519.664	2.54335e-14
DQB9L	194.426	3.43796e-44	DRB30Y	307.786	1.79973e-26	DPB76M	405.381	5.13241e-23	DRB71R	468.693	1.76441e-15	DPB11G	525.967	3.79013e-14
DQA207V	207.208	5.58613e-47	DPB178L	368.659	5.45053e-37	DQB37Y	463.848	1.73094e-22	DPB69E	536.974	1.21635e-17	C156L	580.963	3.30258e-11
DRB73A	204.724	1.94578e-46	DQB87Y	317.508	2.40573e-26	DPB1780	399.271	1.53429e-19	DPB57A	509.089	1.07413e-25	C9D	557.501	3.45383e-12
DPB170I	198.487	4.4678e-45	DRB11L	367.522	1.20206e-38	DQA25F	460.396	5.57208e-22	DQB86G	520.764	7.86893e-15	C116F	559.04	6.14217e-10
DQA560	197.578	7.05238e-45	DQB45E	356.515	1.93149e-36	DPB69K	493.92	9.83585e-32	DPB205V	541.016	6.75995e-12	DPB65I	589.718	2.97866e-12
DQA69T	207.208	5.58613e-47	DPB76V	393.89	1.68453e-42	DQA175E	511.237	2.40994e-27	A90A	559.02	4.76265e-12	DPB96R	591.131	1.45589e-08
DRB96E	204.424	2.26222e-46	DQA11C	335.172	2.81131e-30	DPB57A	400.59	6.05738e-16	DPB35L	459.291	1.83516e-14	DRB57A	501.686	7.45864e-11
DPB65I	196.921	9.81146e-45	DRB11P	322.246	4.32176e-29	DQA130S	415.591	4.39148e-22	DQA53Q	468.018	4.46711e-13	DPB76V	512.394	2.70918e-11
DRB58S	214.181	1.68135e-48	DPB170T	326.496	3.04891e-26	DQA175E	415.874	3.26124e-21	DQA215F	485.926	5.77511e-17	DPB55E	531.748	1.29506e-11
DRB.24F	195.065	2.49352e-44	DPB96R	341.172	1.22999e-33	DQB38A	423.068	1.43428e-19	C116S	502.333	5.43329e-19	DQA.13T	552.113	1.7196e-12
DRB77T	207.113	5.8591e-47	DPB178L	370.93	1.65824e-37	DQA40E	490.078	9.71909e-28	C163E	547.943	2.80727e-14	DPB9H	592.75	2.17476e-11
DQA.13T	192.893	7.42733e-44	DQB87Y	287.237	2.65204e-22	DRB13G	347.987	6.48015e-15	DQB30Y	404.093	6.86748e-14	DPB84V	458.89	1.33659e-13
DQA.7V	204.304	2.40285e-46	DPB69E	357.407	3.63725e-35	DRB13S	423.772	3.74539e-16	DQB130R	478.269	1.55731e-13	DRB77T	537.493	1.40672e-14
DQB185T	176.819	2.39877e-40	DPB9Y	293.246	3.83235e-27	DPB55E	346.011	3.75985e-13	DQB26G	398.388	4.57952e-13	DQB70E	491.867	4.10533e-22
DQA.13T	192.346	9.7774e-44	DPB55D	326.242	5.75882e-31	DQA69T	426.333	1.45567e-23	DQA160D	501.071	5.37519e-18	A156W	529.662	8.93663e-08
DQB185T	205.604	1.25008e-46	DQB70E	343.07	9.53526e-32	DPB76I	424.633	1.69798e-19	DPB57A	484.006	1.3044e-14	DQA.7V	526.76	6.20665e-11
DRB71K	194.464	3.37334e-44	DQB55P	323.96	5.28191e-30	DPB9Y	412.448	5.11371e-21	DQA.13T	468.883	5.80856e-14	DPB84D	506.415	8.99103e-10
DPB96K	284.856	6.56853e-64	DQB.10S	440.288	1.12657e-35	DRB13G	540.899	1.11914e-23	DQA160D	590.971	1.4825e-12	C97S	617.226	2.99137e-07
DQA25F	206.924	6.44275e-47	DPB55E	347.031	2.52184e-32	DRB10Y	455.074	2.63068e-25	DPB96K	510.127	1.17287e-13	DRB58N	549.504	3.49481e-10
DQB37Y	195.192	2.33942e-44	DPB170T	325.238	4.00487e-30	DQA.6M	425.079	1.65097e-23	DQB57A	505.559	2.9365e-19	DPB69K	541.055	2.55646e-09
DRB67I	199.57	2.59251e-45	DQB182S	308.192	1.96352e-25	DPB55A	392.161	5.02513e-20	DPB35L	463.782	2.6076e-17	DQA207M	523.323	1.19802e-14
DPB76M	235.421	3.91914e-53	DRB51R	402.079	3.97243e-38	DQB70R	501.4	2.14746e-23	DPB1780	560.486	1.50927e-14	DQA130S	610.508	1.52007e-12
DQA.13A	207.429	4.99838e-47	DQB197S	356.741	2.45062e-34	DPB69K	493.062	1.69732e-31	DQA.16L	535.618	6.87129e-11	DPB35Y	560.995	4.71327e-07
DQB13A	198.359	4.76438e-45	DPB55D	359.881	5.26083e-37	DQB126Q	463.495	2.45774e-24	DQA107T	519.591	6.90277e-14	DPB69E	570.869	8.01835e-13
DQA47K	192.689	8.22892e-44	DPB36A	320.639	1.15135e-29	DQB55P	426.241	9.01385e-25	DPB170T	518.33	8.28507e-22	DQA.6M	572.498	1.84028e-13
DRB233T	197.201	8.52413e-45	DQA.16L	327.355	3.79152e-30	DPB84D	439.52	3.28864e-26	DPB205M	528.655	3.68766e-21	C77N	562.6	5.66693e-09
DQB860	194.426	3.43796e-44	DQA25F	349.714	1.21157e-35	DPB96R	438.884	3.62158e-21	DPB84V	534.023	1.775e-22	DQA53G	571.099	1.13626e-09
DPB96K	254.517	2.68996e-57	DRB10E	409.721	1.26345e-35	DRB58Y	486.814	1.63081e-18	C304M	523.997	1.0759e-09	DQB57A	568.372	2.71062e-11
DRB11L	204.487	2.19176e-46	DPB76V	357.808	3.25934e-35	DQB197S	458.041	1.35456e-23	DQA69T	505.831	4.74501e-12	C.17T	552.597	7.99778e-12
DRB133R	195.325	2.18781e-44	DPB194R	344.504	2.6212e-34	DQB203I	450.084	9.11434e-25	C184H	511.373	4.92756e-15	DRB57S	555.689	2.79453e-11
DQB9L	194.426	3.43796e-44	DQA129Q	336.994	7.30611e-33	DPB36A	448.687	4.17195e-26	DPB215I	493.456	2.21649e-11	DPB76I	558.727	6.52914e-16
DQB55R	150.719	1.2075e-34	DPB57E	262.177	4.69593e-26	DPB33E	344.429	1.19774e-19	C152E	391.995	5.31816e-12	DRB58L	435.836	3.56189e-11
DPB9H	272.067	4.02151e-61	DRB71E	440.903	1.32893e-38	DQA207V	546.917	7.32221e-25	DRB74E	603.688	4.8944e-14	B116F	628.497	6.33172e-07
DRB58F	210.596	1.01814e-47	DPB11G	362.728	5.92807e-35	DQA207M	468.168	9.78332e-25	DPB170T	553.283	2.81467e-20	C304V	623.964	4.19908e-17
DQB60N	194.426	3.43796e-44	DQB182S	314.365	6.52443e-28	DPB69E	373.842	1.23684e-14	DRB51R	430.122	6.28523e-14	B.16L	480.936	1.01588e-12
DQB9L	194.426	3.43796e-44	DQA129Q	351.353	5.31083e-36	DPB194Q	409.64	2.26484e-14	DPB9H	476.492	2.92721e-16	DRB86G	511.262	3.71103e-09
DQA.7M	192.247	1.02754e-43	DQA560	330.883	5.29225e-32	DPB9H	430.725	1.65035e-23	DPB76I	497.424	3.16286e-16	A149A	535.931	5.45662e-10
DPB205V	226.218	3.98324e-51	DQB9L	386.256	1.10998e-36	DPB9H	467.484	2.01116e-19	DRB58S	539.72	1.90904e-17	DQB167R	587.344	5.16498e-12
DPB205V	228.495	1.26933e-51	DQA160S	391.245	2.83683e-37	DRB26F	489.404	3.86124e-23	DQA25F	550.249	6.17464e-15	B113H	584.481	4.89159e-09
DPB178L	231.851	2.35353e-52	DRB10E	397.684	6.0161e-38	DQB71T	506.018	2.27084e-25	DQA107T	571.626	5.50117e-16	C.15I	606.023	4.49511e-09
DPB84G	224.399	9.92963e-51	DQA.6T	387.689	2.16191e-37	DQA50L	528.411	1.8503e-32	DQA52R	576.127	4.92861e-12	DPB55E	614.848	4.8884e-10
DQA1K	192.689	8.22892e-44	DQB125G	319.81	1.7483e-29	DPB205M	392.809	1.2972e-17	DPB9H	441.06	3.74998e-12	DPB84G	517.61	2.1468e-18
DRB77T	206.039	1.00468e-46	DQA53Q	359.243	3.45748e-35	DPB69K	496.187	1.24032e-31	C116F	534.089	7.43916e-10	DQB30H	568.464	4.5448e-09
DQB30Y	196.453	1.24167e-44	DQB1160	336.414	2.71453e-32	DPB69E	431.478	1.84322e-22	B11A	472.312	1.65749e-10	DRB85V	511.624	3.61162e-10
DQA11C	199.305	2.96199e-45	DQB70T	306.119	4.88824e-25	DPB170I	406.562	1.21865e-23	DQA160A	495.236	4.65526e-21	DPB36A	555.994	6.45435e-15
DPB96K	184.532	4.96636e-42	DQA.13T	316.461	1.55064e-30	DQA25F	408.775	7.39513e-22	DRB67F	486.452	1.21354e-18	C304M	546.89	7.59238e-15
DQA160D	207.208	5.58613e-47	DPB96K	378.652	3.57795e-39	DQA53G	471.017	7.20954e-22	DQA215F	537.843	2.96562e-16	DPB36A	580.684	5.93633e-11
DQB71T	193.85	4.593e-44	DPB84D	307.624	1.46036e-26	DQB57A	376.576	1.00871e-16	DQB224Q	440.334	1.40653e-15	B12M	474.06	6.34573e-09
DRB149Q	195.465	2.03934e-44	DQB37Y	325.381	4.27534e-30	DPB205M	403.404	1.01872e-18	DPB33E	464.942	4.34226e-15	C114D	509.193	2.88858e-11
DQA.7V	181.431	2.36018e-41	DQB136Q	292.835	4.82583e-26	DPB55E	393.857	9.09914e-24	C304M	443.885	1.51571e-12	DQB26L	479.649	2.22668e-09
DPB11G	206.962	6.31937e-47	DQB57S	377.43	5.84752e-39	DQA.13T	456.541	5.87301e-19	DQA107T	529.527	1.30562e-17	DQB.270	580.93	7.51943e-13
DQB.18V	199.095	3.29025e-45	DPB205V	339.573	2.09309e-32	DQA138I	435.197	1.38912e-22	DQB57D	517.282	1.3036e-19	C275E	557.547	2.21747e-10
DQA.7M	192.346	9.7774e-44	DQB135D	314.338	2.31842e-28	DPB170T	397.989	5.90255e-20	DPB9Y	501.85	2.16997e-24	B.11W	541.743	2.68309e-10
DPB96R	224.721	8.44559e-51	DQB45E	385.642	7.12028e-37	DQA69T	512.473	2.02283e-29	DPB69K	567.844	9.98024e-14	C156Q	594.173	2.87868e-07
DPB69K	203.687	3.27493e-46	DQA41K	371.396	2.34266e-38	DQA175E	480.264	1.73464e-25	C304V	528.222	4.35268e-12	DQA207M	575.017	7.88235e-12
DQB60N	194.426	3.43796e-44	DPB76M	370.815	2.97697e-40	DQA69L	466.076	1.66926e-22	DRB60Y	516.238	1.41558e-12	DPB205V	559.062	5.98811e-11
DRB13H	221.73	3.79325e-50	DQB136Q	311.002	3.44052e-21	DPB57D	378.051	2.64832e-16	DQA11C	437.538	1.23109e-14	DPB960	487.084	1.93823e-12
DQA160A	202.858	4.96668e-46	DQA207M	355.812	3.92157e-35	DPB69K	480.61	5.63527e-29	DPB35F	543.214	2.52737e-15	C156L	582.871	3.02731e-10
DQB86A	174.407	8.06793e-40	DQB220H	289.144	8.98653e-27	DPB36A	377.08	6.75945e-21	DPB57D	469.011	8.97273e-22	DQA160A	517.955	2.63402e-12
DRB30H	216.949	4.18713e-49	DPB55E	335.934	1.05548e-27	C2750	386.733	1.02325e-12	DRB57S	438.73	5.55773e-13	DQB70G	487.248	3.27225e-12
DQA75I	204.066	2.70767e-46	DPB65I	342.985	4.58674e-32	DRB58Y	438.347	1.58621e-22	DQA129Q	506.166	1.79207e-16	DPB55E	555.119	2.62161e-12
DQB26G	204.979	1.71169e-46	DQA.6T	345.018	2.61024e-32	DPB69K	449.177	1.86676e-24	DPB57A	512.883	1.44427e-15	DQA130S	554.925	8.93669e-11
DQA107T	199.305	2.96199e-45	DQB.27S	306.119	4.88824e-25	DPB11G	411.893	8.26663e-25	DPB76I	483.471	2.66478e-17	DPB57A	538.238	1.35683e-13
DRB73A	209.215	2.0378e-47	DQA52R	338.643	5.46466e-30	DPB84G	430.311	1.02511e-21	DQA.6T	475.658	1.65067e-11	B167S	522.863	6.39523e-12
DQB135D	200.545	1.58836e-45	DPB96R	377.151	2.66948e-40	DQB.18A	489.728	2.67156e-26	DPB35F	552.858	1.93463e-15	A109F	584.632	1.73215e-08
DPB205V	267.732	3.54202e-60	DRB10E	431.419	1.77082e-37	DQA.16L	543.039	4.32737e-26	C275E	586.868	3.58273e-11	DQB9L	632.718	1.27664e-11
DQB182S	212.718	3.50648e-48	DQB.18A	336.932	7.56209e-29	DPB35Y	421.136	4.46429e-20	DPB57E	487.237	4.28242e-16	DRB71A	534.282	6.93977e-12
DRB670	195.065	2.49352e-44	DQA107T	326.562	1.92777e-30	DPB96R	443.724	2.6451e-27	DPB9Y	508.446	8.62661e-16	DQB116V	553.668	1.75873e-11
DQA207V	207.208	5.58613e-47	DPB35L	330.793	1.03835e-28	DPB11G	418.66	6.9981e-21	DRB96E	474.863	6.53901e-14	B24A	521.193	9.98864e-12
DQB.18A	198.369	4.73906e-45	DRB60Y	329.663	2.13594e-30	DPB215I	417.264	8.00764e-21	DQA.16M	469.322	5.38759e-13	C156W	504.2	3.51105e-09
DRB51R	195.198	2.33206e-44	DPB11G	337.724	7.46362e-33	DQB66D	456.565	1.13484e-27	DQA25F	514.634	2.53013e-14	C156W	555.33	1.77894e-10
DPB96R	189.717	3.66532e-43	DQB2030	326.258	1.51947e-31	DQB1970	447.193	3.94768e-28	DPB36A	543.898	8.04956e-23	DQA.6T	585.876	9.23112e-11
DQA130S	207.208	5.58613e-47	DQA69L	361.7	1.80812e-35	DPB170I	512.509	1.15364e-34	DPB35F	556.95	2.62076e-11	DRB86G	586.819	4.62199e-08
DPB9Y	257.646	5.59276e-58	DQB860	427.202	9.25031e-39	DQA129Q	549.582	1.90593e-28	C.150	585.313	2.26579e-09	DQB136Q	618.973	6.56159e-09
DQA47K	192.689	8.22892e-44	DQB203I	331.091	5.95341e-32	DPB76V	423.412	7.37099e-22	C.150	473.247	1.67213e-12	DPB96R	517.744	2.54668e-11
DQB57D	201.66	9.07124e-46	DPB84D	336.646	3.3241e-31	DRB71A	449.623	2.18304e-26	DQA.7V	526.496	1.82351e-18	B30D	550.22	1.11178e-06
DRB.24F	195.065	2.49352e-44	DPB9H	350.273	1.26127e-35	DQB53L	481.279	2.46766e-30	DPB35Y	557.592	2.4211e-18	DQA207M	597.779	2.30789e-10
DQB57D	195.69	1.8211e-44	DPB55D	324.312	8.20716e-30	DQB185I	399.237	4.88838e-18	DQA50L	462.972	1.42317e-15	C156W	497.087	5.19732e-09
DQB.27S	194.426	3.43796e-44	DQA.13A	351.373	5.25713e-36	DPB9H	466.248	8.38324e-27	DQA130S	498.925	1.08795e-08	B77S	523.649	6.61517e-07
DPB205M	178.95	8.21734e-41	DQA41K	291.143	3.24208e-26	DPB170I	394.166	3.3116e-24	DRB74E	489.496	1.61149e-22	DQB57V	592.215	3.86219e-24
DRB58D	195.065	2.49352e-44	DQB66D	325.011	4.21186e-30	DPB9H	440.882	5.07159e-27	DPB84V	504.94	1.20831e-15	DPB960	566.84	3.61295e-15
DRB57S	184.526	4.97993e-42	DPB55A	327.651	5.5213e-33	DPB76V	411.427	5.54027e-20	DQA47K	494.239	9.02459e-20	C9Y	551.969	3.00733e-14
DPB11G	154.774	1.56855e-35	DRB67I	303.648	3.05657e-34	DRB11P	435.051	2.02038e-30	DQB224Q	476.801	1.0376e-10	C152E	515.726	4.40352e-10
DQB70T	194.426	3.43796e-44	DQA.16M	327.995	6.78861e-31	DPB57D	444.696	3.33831e-27	DQA52R	487.559	5.87058e-11	DPB1780	534.041	9.2452e-12
DQB60N	194.426	3.43796e-44	DPB170I	345.675	9.24446e-35	DQA53G	470.95	4.43071e-29	DPB194Q	557.75	1.20069e-20	DQA1K	584.366	2.48276e-07
DQA129H	207.171	5.69003e-47	DQB60N	356.082	2.9997e-34	DPB69E	434.377	8.87377e-19	DPB55E	533.922	1.91717e-23	B114N	568.75	3.60164e-09
DQB182S	202.586	5.69547e-46	DRB10E	342.001	3.57345e-32	DPB55A	452.782	6.61008e-26	DPB76I	514.642	3.6871e-15	DQA69T	558.911	2.86162e-11
DQA160S	192.689	8.22892e-44	DPB36A	352.28	1.39012e-36	DQA53Q	446.464	2.87461e-22	DQB66D	507.533	5.51204e-15	B77S	560.86	2.82445e-13
DQB9L	194.426	3.43796e-44	DQA160A	336.994	7.30611e-33	DPB9Y	433.296	9.86386e-23	DPB69E	478.705	1.59861e-11	DPB55D	530.362	6.6112e-13
DRB38L	195.565	1.93996e-44	DPB36A	315.58	6.27629e-28	DRB74E	397.85	1.18745e-19	DPB205V	453.384	9.18557e-14	DPB178L	536.934	6.21007e-20
DQA138T	207.208	5.58613e-47	DQB74S	352.668	1.70299e-33	DPB9H	458.516	7.96109e-25	DPB1780	524.04	5.74202e-16	DQA207M	567.982	3.3822e-11
DPB36A	224.894	7.74265e-51	DRB10E	384.762	1.20908e-36	DQA187A	477.37	6.37744e-22	C113H	522.289	2.05293e-11	DPB84G	557.658	2.72793e-09
DRB.1S	195.065	2.49352e-44	DQB13A	315.71	4.57098e-28	DPB55E	406.414	1.668e-21	DQA53G	466.14	1.09039e-14	B109F	497.691	1.94318e-08
DPB194R	246.114	1.82658e-55	DQB9L	400.811	1.63052e-35	DQA160S	495.043	2.80691e-22	DRB74L	552.381	3.67022e-14	DRB13G	579.702	1.72293e-07
DPB9H	211.391	6.83003e-48	DQA175E	385.079	1.15824e-39	DQB860	506.774	2.69149e-28	DPB65I	543.216	1.57246e-09	DQA207M	580.638	9.51632e-10
DRB57S	196.695	1.099e-44	DPB96K	360.37	1.78134e-37	DQB197S	464.714	1.70076e-24	DQA52R	510.821	1.1197e-11	C219R	551.22	2.07095e-10
DQB9L	194.426	3.43796e-44	DPB84D	314.413	6.36598e-28	DQA1E	410.318	1.20558e-22	DRB96H	477.965	1.95501e-16	C0G	513.939	2.00004e-09
DQA69T	192.893	7.42733e-44	DPB76M	341.372	3.72881e-34	DQB.10A	455.253	1.38368e-26	DQA187A	505.83	1.14541e-12	A44K	538.751	9.60109e-09
DQA107T	207.154	5.73801e-47	DQB56L	356.091	2.96042e-34	DPB35L	425.54	7.84278e-17	DPB76M	484.534	1.58114e-14	DPB55E	557.146	1.57819e-17
DQB60N	194.426	3.43796e-44	DPB9H	345.83	8.55252e-35	DQB77R	446.731	9.66898e-24	DQA207M	512.257	5.73633e-16	DPB178L	564.497	4.91149e-13
DQA560	171.732	3.09637e-39	DPB178M	261.113	3.25664e-21	DQA41K	323.527	2.78361e-15	DRB67I	385.342	3.77346e-15	DPB205M	445.714	7.85251e-15
DPB35Y	230.366	4.96095e-52	DQA.6T	380.411	1.6945e-34	DQA53G	476.083	1.35606e-22	DQA25F	543.72	1.96524e-16	C219R	586.102	7.50633e-11
DPB84D	235.777	3.2776e-53	DQB220R	392.894	4.82487e-36	DQA53Q	527.519	3.98887e-31	DQB197S	578.355	1.00422e-12	C147L	613.783	2.64646e-09
DRB.1S	195.065	2.49352e-44	DQB70E	322.652	1.38238e-29	DPB65I	424.796	5.1615e-24	DPB178M	470.247	1.56483e-11	DQA.6M	512.606	7.59986e-11
DPB96K	245.867	2.06738e-55	DQA40E	414.748	1.29926e-38	DRB51R	529.292	9.90363e-27	DPB9H	570.052	1.72092e-10	A95L	599.344	6.22638e-08
DPB55A	196.97	9.57249e-45	DQB57S	369.803	1.7805e-39	DQA.6M	460.091	2.05854e-21	DQA.7M	523.467	1.70805e-15	C219W	567.463	3.29e-11
DQA138T	207.208	5.58613e-47	DPB194R	348.561	1.34699e-32	DQB87F	455.294	5.09351e-25	DQA47K	523.106	1.7981e-16	C21H	572.111	2.55327e-12
DQA.7V	198.47	4.50529e-45	DQB28S	350.967	4.93507e-35	DPB170T	491.006	2.60932e-32	DPB76V	530.809	2.80972e-10	B70Q	571.307	1.96837e-10
DPB1940	215.761	7.60574e-49	DRB11G	380.91	8.48645e-38	DQB125A	487.918	4.433e-25	DQA207V	541.171	2.93303e-13	C21H	588.529	5.91318e-12
DPB55A	182.02	1.75523e-41	DQB57D	307.796	3.44308e-29	DRB71E	393.513	2.07561e-20	DQA129Q	515.543	2.27424e-28	DQB70R	575.316	1.06445e-14
DPB8L	227.732	1.86237e-51	DRB28E	379.952	5.67011e-35	DRB85A	486.451	5.73359e-25	DPB69E	567.49	2.21265e-19	C114N	616.267	2.86789e-12
DPB9Y	214.226	1.64433e-48	DQA52R	388.609	8.1638e-40	DQB9L	508.617	6.30039e-28	B80N	544.821	1.77747e-09	DQB70T	591.361	8.97361e-12
DRB71E	205.922	1.06549e-46	DPB76V	360.673	1.58709e-35	DQA215F	483.825	1.2921e-28	DPB178M	559.398	3.52158e-18	C219R	630.416	3.53961e-17
DPB11G	215.68	7.92198e-49	DQA107T	370.908	1.24815e-35	DQB116V	455.967	2.89661e-20	DQA.6M	499.085	5.15139e-11	DQB57A	534.394	2.81393e-09
DRB57S	234.486	6.26716e-53	DPB76M	387.497	3.80981e-35	DQA207V	476.883	3.24834e-21	DRB.16V	537.333	7.54637e-15	DPB178M	593.164	7.89902e-14
DPB65I	231.697	2.54232e-52	DQA160A	409.713	1.31404e-40	DQA207M	540.354	2.96675e-30	C156L	579.091	4.8509e-10	DQB136E	605.3	3.06371e-07
DPB205V	236.073	2.82451e-53	DRB.25K	411.369	5.1594e-40	DQA.6T	502.093	1.65162e-21	DQB57S	556.555	1.58533e-13	B163L	598.781	8.13127e-11
DRB.24F	195.065	2.49352e-44	DQA52R	350.687	1.02415e-35	DPB205V	486.681	2.00097e-31	DPB76I	542.101	9.73305e-14	DQA34E	596.379	1.74032e-13
DRB71E	149.527	2.20008e-34	DQA.6T	257.533	2.67854e-25	DPB69K	367.858	8.32039e-26	DPB170T	432.155	1.06972e-15	DQA41K	486.648	1.56001e-13
DQB70T	194.426	3.43796e-44	DPB76M	356.427	4.13398e-37	DQA.6T	454.366	4.3163e-23	DRB67I	539.026	3.54222e-20	C97R	571.607	1.14352e-08
DRB57S	195.262	2.25856e-44	DRB13H	345.673	1.40988e-34	DPB96R	449.679	2.01715e-24	DQA50L	506.43	4.94498e-14	C114D	545.637	3.81118e-10
DPB35F	252.518	7.33689e-57	DQB136E	406.769	2.04088e-35	DQA138T	504.204	5.56723e-23	DQB30H	570.512	3.85613e-16	DPB170I	622.502	5.57938e-13
DRB71A	217.917	2.57483e-49	DPB1940	393.665	4.11019e-40	DQA47K	481.011	9.11003e-21	DQB13A	545.79	8.37824e-16	DPB11G	575.79	4.32135e-08
DQB56L	194.426	3.43796e-44	DPB96K	333.476	4.29524e-32	DRB86G	428.758	1.65089e-22	DPB55A	489.35	7.02184e-15	B156R	532.624	4.75929e-11
DQB185T	197.947	5.85825e-45	DQB125G	339.492	1.22325e-32	DPB55A	449.506	9.72847e-26	DQA.6T	493.512	3.27408e-11	DQB2030	539.38	1.26494e-11
DPB9Y	243.954	5.40237e-55	DQA.7V	420.574	2.65188e-40	DQB57A	517.392	7.59781e-23	DQB77R	560.683	4.71799e-11	DQB.27S	588.426	1.38575e-07
DPB65I	263.314	3.25261e-59	DQA.7V	442.991	5.70074e-41	DQB57D	560.87	1.84303e-27	DQA160A	604.597	3.77397e-11	B156L	640.458	2.11943e-09
DQB136E	194.426	3.43796e-44	DQA69T	303.142	1.87323e-25	DPB35F	401.131	4.20593e-23	DQA207M	460.859	1.08911e-14	DPB57A	507.888	6.9958e-12
DQA.160	192.689	8.22892e-44	DQA1E	301.449	1.83234e-25	DPB215I	409.39	2.76908e-25	DQA207M	473.574	1.13305e-15	DPB69K	527.131	2.51173e-13
DQB57S	194.426	3.43796e-44	DPB9Y	323.108	7.96066e-30	DQA160S	423.846	1.05006e-23	DQB9Y	504.944	2.14766e-19	DPB57A	570.98	4.42667e-16
DPB65I	211.706	5.82982e-48	DRB10T	390.25	1.00758e-40	DQA.6T	478.685	5.25522e-21	DPB194Q	552.99	6.69294e-18	DQB26L	613.913	5.93347e-15
DPB55D	189.074	5.06255e-43	DQB57D	303.505	1.04894e-26	DRB67F	371.879	1.35248e-16	DQB86G	408.311	1.58083e-09	DQB77R	468.825	7.30487e-15
DPB9Y	206.269	8.95363e-47	DRB96Y	371.213	9.40471e-38	DQB135D	484.186	2.18736e-26	DQA160D	526.503	7.76492e-11	B.8L	574.273	4.79108e-12
DPB215I	207.136	5.79213e-47	DQB13A	382.364	5.33693e-40	DQB125A	491.903	1.23632e-25	C.170	540.669	2.88441e-12	DQA69T	583.835	5.02923e-11
DPB8L	226.701	3.12543e-51	DQA52R	350.932	7.49815e-29	DQB55P	453.473	4.22368e-24	DRB47F	506.878	2.71406e-13	C9D	554.402	5.4339e-12
DRB670	195.065	2.49352e-44	DPB55E	329.283	4.89577e-31	DQB30Y	459.841	3.09418e-30	C152E	521.898	3.3357e-15	DPB205M	566.531	2.37683e-11
DQB136E	194.426	3.43796e-44	DPB69E	342.597	4.35197e-34	DQA40E	468.598	3.07416e-29	DQB70G	515.728	6.64105e-12	DPB9H	544.93	6.52333e-08
DRB96E	194.983	2.59904e-44	DPB57D	334.67	3.1155e-32	DQA.16M	445.179	7.58077e-26	DPB55A	504.758	1.1746e-14	DQB30H	575.894	3.33562e-17
DPB84D	190.711	2.22442e-43	DQB86G	349.67	1.90953e-36	DQA26S	470.28	4.65136e-28	DPB76V	552.104	1.48822e-19	B97S	596.749	2.36117e-11
DQA187A	202.242	6.7705e-46	DQB86G	356.67	1.86674e-35	DPB11G	442.075	2.43194e-20	DPB178M	510.366	1.41042e-16	B94T	547.906	8.95698e-10
DRB10E	195.065	2.49352e-44	DPB65I	325.342	3.56441e-30	DQA25F	418.395	5.08985e-22	DQB57S	474.44	7.08435e-14	DPB1940	509.388	3.38591e-09
DQA.6T	192.689	8.22892e-44	DQA.160	301.449	1.83234e-25	DQB57A	378.43	1.72591e-18	DPB194Q	433.619	1.09464e-13	DPB76I	494.085	7.48834e-15
DQB9L	194.426	3.43796e-44	DPB57E	350.596	7.77294e-36	DQA160A	473.231	1.67609e-28	DPB76I	557.143	5.17224e-20	C73A	609.264	5.21708e-13
DRB10E	195.065	2.49352e-44	DRB9E	344.284	2.56886e-34	DPB96K	446.511	4.94959e-24	DPB35L	515.564	9.58473e-17	DPB57A	552.64	1.13622e-09
DQA138I	192.689	8.22892e-44	DQB66D	304.267	4.42127e-26	DPB65I	390.037	2.02172e-20	DQA.13T	466.326	2.45005e-18	DPB205M	525.773	1.25609e-14
DRB30Y	232.997	1.32355e-52	DPB35Y	366.009	8.98538e-31	DQB9F	469.504	2.61094e-24	C.15I	533.329	1.35972e-15	DPB76I	594.392	5.52728e-15
DRB58D	195.065	2.49352e-44	DPB84D	359.607	1.15168e-37	DQB57D	460.076	1.2029e-23	DQA41K	510.651	1.14697e-12	DQB2030	550.625	2.57273e-10
DRB70R	199.892	2.20501e-45	DPB9Y	364.648	1.03436e-37	DQA.7M	458.746	3.00287e-22	DRB74L	519.376	6.88681e-15	DPB194Q	557.032	8.43885e-10
DPB96R	251.541	1.19831e-56	DRB.16V	418.206	3.95942e-38	DQA207M	514.051	1.24206e-22	DQB125A	582.764	1.13878e-16	C77N	624.6	9.92483e-11
DPB55E	230.624	4.35796e-52	DQA69T	398.68	1.96677e-38	DQB125G	524.333	3.66306e-29	DPB11G	599.14	5.18899e-18	DQB2030	641.664	6.98364e-11
DQA138I	192.689	8.22892e-44	DQA560	305.237	2.71047e-26	DPB960	399.106	3.37125e-22	DPB194Q	464.24	6.99657e-16	DQB66D	514.476	1.36349e-12
DQA138I	192.689	8.22892e-44	DRB57D	302.22	1.24178e-25	DPB170I	382.928	2.61651e-19	DPB84V	462.47	4.72158e-19	DQB55P	518.883	5.87123e-14
DQA160D	207.208	5.58613e-47	DPB194R	407.985	1.41309e-45	DQB57A	504.155	1.05456e-22	DRB32H	552.696	3.23421e-12	DPB57E	584.018	2.18573e-08
DPB65I	226.482	3.4874e-51	DQB.10S	390.357	1.61095e-37	DQA107T	524.294	5.64189e-31	DQA215F	568.653	2.73259e-11	DPB76M	601.626	9.34356e-09
DRB74R	207.767	4.21801e-47	DPB205V	380.747	1.65267e-39	DQA25F	481.918	8.43955e-24	DPB35F	557.997	2.72587e-18	DQA215F	625.832	1.77746e-16
DQB.27S	194.426	3.43796e-44	DQB167R	339.262	2.33298e-33	DPB960	420.799	1.7196e-19	DPB33E	472.683	5.88917e-13	C97R	524.401	6.40581e-13
DRB26Y	195.08	2.47439e-44	DQA25F	351.154	8.15984e-36	DPB69K	481.913	2.79517e-30	DPB57A	569.375	8.59309e-21	DQB30H	606.222	1.27716e-09
DRB73A	217.641	2.95767e-49	DQA.7V	359.221	1.20178e-32	DPB9H	487.847	8.18717e-30	DQA107T	526.632	4.73171e-10	C0G	568.102	1.19687e-10
DQA207V	192.893	7.42733e-44	DPB55A	361.323	1.62982e-38	DQB70G	452.366	1.40558e-21	DPB205M	552.971	1.12327e-23	DRB67F	603.441	1.2098e-12
DRB57S	218.463	1.95698e-49	DQB38A	351.29	9.86686e-31	DPB35F	448.6	5.92757e-23	C152E	488.269	3.00832e-10	DQA138I	531.692	4.41093e-11
DQB86G	198.369	4.73906e-45	DQB185I	323.343	5.15772e-29	DPB36A	405.079	1.5549e-19	C9D	445.688	1.85952e-10	B131R	487.022	1.28334e-10
DPB36A	191.943	1.19766e-43	DQB45E	349.123	4.67368e-36	DRB67F	453.365	1.79065e-24	DQA53Q	515.309	3.53329e-15	C103L	564.909	1.88571e-12
DQB30Y	199.809	2.29928e-45	DQB45E	342.774	5.98039e-33	DPB55A	431.721	4.05525e-21	DQA75I	477.52	1.31057e-11	DPB178L	527.508	1.54695e-12
DPB170I	197.044	9.22265e-45	DQB86G	338.881	1.05572e-32	DRB28E	473.535	3.93003e-31	DQB30Y	523.599	1.48862e-12	DPB9Y	561.747	6.5578e-10
DPB69E	218.873	1.59306e-49	DQA160A	385.595	3.84694e-38	DQB60N	514.093	8.73559e-30	DQB57A	562.991	2.69577e-12	DQA.6T	596.476	7.17987e-09
DPB215I	154.011	2.30273e-35	DRB9W	277.362	1.16883e-28	DQA207M	395.941	1.29454e-27	DQA52R	461.106	6.88943e-16	B67F	508.758	5.08893e-12
DRB31I	210.131	1.28606e-47	DPB76M	355.207	2.06707e-33	DQB57D	474.537	8.86769e-28	DPB960	571.813	6.03247e-23	C152E	609.48	8.38847e-10
DPB11G	232.919	1.37677e-52	DQA1K	397.307	1.24441e-37	DQA.16L	503.714	6.0041e-25	DPB178M	560.973	3.81999e-14	C1840	611.833	9.92099e-13
DQB.27S	194.426	3.43796e-44	DPB960	325.977	1.87576e-30	DPB84G	406.673	2.63271e-19	DQA11C	466.486	1.04294e-14	DQB60N	519.9	2.7016e-13
DRB.1S	195.065	2.49352e-44	DPB57E	321.731	2.1985e-29	DPB35L	414.162	6.97049e-22	DQA53Q	496.747	1.01214e-19	DQB125A	545.934	2.32753e-12
DQB86G	192.216	1.0438e-43	DQB2030	331.581	3.66589e-32	DPB69E	425.443	3.3828e-22	C303A	480.021	1.4939e-13	DQA.6T	526.347	1.00109e-11
DRB96Y	192.832	7.65805e-44	DPB215I	333.581	1.82576e-32	C73A	399.193	5.4897e-16	DQB55P	471.451	1.88872e-17	DRB58F	517.42	1.20145e-11
DQB70T	194.426	3.43796e-44	DQA50L	350.556	7.92972e-36	DPB205M	432.532	1.37753e-19	DQB116V	470.284	8.03379e-10	DPB9H	499.89	5.29352e-08
DRB57S	206.811	6.81618e-47	DPB84D	314.714	2.82357e-25	DQB57D	411.462	7.87172e-23	DQA160A	456.225	2.22376e-11	DPB96R	502.489	1.0334e-11
DQA138I	192.689	8.22892e-44	DPB96K	314.129	3.061e-28	DRB32H	394.353	3.34318e-19	DQA175E	462.494	1.52206e-16	DPB33E	499.924	9.47548e-10
DRB26Y	183.715	7.48691e-42	DQA.16M	286.41	3.90865e-24	DPB178L	367.463	2.19747e-19	DPB205V	451.957	3.8545e-20	DRB67F	508.265	6.19512e-14
DPB55A	206.985	6.24578e-47	DQB136E	372.134	8.48882e-38	DQA160A	451.628	4.83606e-19	DQA75I	510.934	1.35015e-14	C184H	547.293	1.64048e-09
DRB74R	194.853	2.77337e-44	DPB194R	366.845	2.71828e-39	DQB185T	454.902	6.35667e-21	B325S	518.377	1.62491e-15	DPB178M	586.785	1.32916e-16
DPB69E	209.849	1.48166e-47	DQB86G	367.922	2.98325e-36	DQA34E	478.461	7.46884e-26	DQA160A	529.874	7.48286e-13	DPB205M	574.011	3.06148e-11
DQA207M	192.689	8.22892e-44	DPB35F	328.527	2.16497e-31	DQA41K	426.664	3.90398e-23	DQA160D	493.713	2.64936e-16	C16G	531.534	7.75133e-10
DQB56L	194.426	3.43796e-44	DPB96R	339.47	2.10055e-33	DQB220H	452.791	1.83497e-26	DQA207V	496.074	4.73709e-11	DPB194R	544.248	3.90135e-12
DPB960	183.966	6.60127e-42	DRB96E	356.281	2.30935e-39	DQB57A	480.826	6.40157e-29	DPB35F	516.398	2.45814e-09	DQA207V	550.692	4.73863e-09
DQB140A	206.454	8.15564e-47	DPB36A	356.309	1.86515e-34	DQB.10S	456.637	1.29122e-23	DQA138T	511.58	1.24087e-13	B94I	565.842	1.75513e-13
DRB57S	197.692	6.65953e-45	DPB96R	350.938	3.38586e-35	DQA11C	456.838	7.75384e-25	DRB73G	524.784	1.68063e-16	DPB57D	558.887	5.22497e-09
DQA.6T	192.689	8.22892e-44	DPB76M	336.405	4.09882e-33	DQB70G	449.29	2.28684e-26	C94I	502.642	2.78799e-13	DPB84V	553.752	8.73394e-13
DRB71K	207.158	5.72584e-47	DPB76M	352.127	2.18203e-33	DQA75I	465.809	1.52946e-26	DPB8L	520.158	1.67874e-13	DQB1160	564.48	2.78641e-11
DQB45E	194.587	3.17117e-44	DQB9F	331.41	1.31779e-31	DPB178M	409.238	1.1245e-18	DPB9H	474.45	6.72636e-16	DPB35Y	541.214	3.05918e-16
DPB76V	198.487	4.46695e-45	DQB.10S	359.022	8.64381e-37	DQB30H	473.675	9.37531e-27	DPB57A	524.807	8.63747e-13	A334V	568.582	3.68324e-11
DQB224Q	198.185	5.19898e-45	DRB60S	343.171	2.16275e-33	DPB178L	464.12	3.92098e-28	DPB33E	533.32	8.89827e-17	DPB76V	590.237	4.54416e-14
DRB26L	198.759	3.89599e-45	DQA130S	339.573	1.76721e-32	DPB96R	451.291	4.11931e-26	C99Y	496.661	1.63099e-11	DRB96H	540.563	3.45218e-11
DPB65I	240.611	2.89419e-54	DQA.7V	408.254	2.42116e-38	DQB220H	543.488	2.93346e-31	DQB77R	574.139	3.09007e-08	C114V	602.04	1.27669e-07
DRB.24F	195.065	2.49352e-44	DPB35F	292.847	4.67158e-23	DQB26G	383.044	2.15589e-21	DQA53Q	447.059	1.23446e-15	DPB960	486.729	3.00777e-10
DQB1970	207.632	4.51343e-47	DPB55D	382.477	6.473e-40	DRB11P	474.398	9.01909e-22	DQA207V	536.754	2.8661e-15	C304V	571.433	3.88903e-09
DPB170I	210.087	1.315e-47	DRB670	413.237	4.28883e-46	DQA.160	514.157	9.58032e-24	DRB74L	576.935	2.31322e-15	DPB57A	623.629	8.29785e-12
DPB96K	220.427	7.29768e-50	DQB860	383.295	2.67309e-37	DQB9F	498.825	6.02574e-27	B67S	543.804	1.99194e-11	C114D	591.979	3.89718e-12
DQA138I	192.689	8.22892e-44	DQB57D	337.824	2.00631e-33	DPB76V	409.742	2.24353e-17	DPB1780	479.436	6.92494e-17	DPB33E	532.56	3.13251e-13
DRB31I	219.516	1.15321e-49	DQA53Q	321.479	5.65818e-24	DQB.27A	396.199	5.42431e-18	DPB76V	463.157	2.77336e-16	B9H	505.56	7.429e-11
DRB71A	202.478	6.01361e-46	DPB36A	331.672	6.15114e-30	DPB9H	422.89	1.28653e-21	DRB51R	496.741	8.42366e-18	DQA129Q	554.865	2.46181e-14
DRB78Y	195.451	2.05361e-44	DQA11C	344.354	3.01218e-34	DPB69E	441.901	5.2572e-23	DPB215I	491.021	2.40774e-12	DQB77R	524.715	6.45141e-09
DQA26S	206.924	6.44275e-47	DQA138T	361.744	1.53268e-35	DPB35L	437.512	3.19025e-18	DPB170T	487.339	1.67888e-12	DPB9Y	535.795	3.37819e-12
DPB205V	264.694	1.62674e-59	DQA41K	428.786	1.44441e-37	DQA175E	509.292	2.89849e-19	C285V	569.943	6.81267e-15	DRB57V	608.419	5.54307e-10
DQA26S	204.304	2.40285e-46	DQB89G	361.64	4.32182e-36	DPB55A	479.467	1.89196e-27	DPB57A	528.337	2.73544e-12	DRB.24L	569.725	1.24796e-10
DRB74R	210.819	9.10362e-48	DQA.7M	365.256	1.85894e-35	DPB69K	500.929	2.35189e-31	DPB76I	540.464	3.22315e-10	DPB960	580.548	2.4326e-10
DQA160S	192.689	8.22892e-44	DPB96R	340.823	4.43446e-34	DQB182S	483.54	6.77815e-33	DPB205M	537.284	2.28371e-13	DQA130S	580.086	6.05982e-11
DPB84D	251.104	1.4923e-56	DRB71K	387.592	1.56004e-31	DQB9F	482.6	1.89635e-22	DRB67I	538.383	8.09446e-14	DQA.7V	566.742	1.00779e-07
DQA53Q	202.904	4.85332e-46	DPB205V	363.172	9.89149e-37	DQB60N	495.51	1.26202e-30	DQB197S	531.156	2.36563e-09	DQA175E	559.621	9.54112e-08
DQB.10S	194.426	3.43796e-44	DPB11G	312.616	1.5755e-27	DQA.160	408.32	1.33436e-22	DRB57S	465.593	3.79191e-14	DPB57D	505.629	2.49352e-10
DQB.10S	194.426	3.43796e-44	DRB.16A	310.114	5.56303e-27	DPB9Y	399.775	2.82624e-21	DQA1K	466.387	3.30571e-16	DPB65I	498.078	1.80756e-08
DPB96K	204.348	2.34977e-46	DQA69L	370.525	5.06037e-38	DRB57D	441.636	3.37641e-17	DRB74E	488.571	7.34094e-12	DQB37Y	525.518	1.21359e-09
DQB136E	194.426	3.43796e-44	DQB1970	333.593	4.04927e-32	DPB35F	430.166	8.6027e-23	DQA47K	476.647	9.24829e-12	DQB53L	516.206	3.18317e-10
DPB205V	195.433	2.07308e-44	DQA41K	373.4	1.34677e-40	DQB57A	476.81	2.72417e-24	DQA1E	534.244	3.49559e-14	C152E	569.9	2.3541e-09
DQB57S	194.426	3.43796e-44	DPB96K	330.321	2.104e-31	DQA41K	441.052	6.7744e-26	C275E	507.54	3.52158e-16	DQA.13A	555.308	4.79734e-12
DQA187A	207.15	5.75053e-47	DPB178L	304.844	4.88368e-23	DPB76I	382.44	1.26424e-18	DRB60Y	458.137	3.30685e-18	DRB74L	501.38	4.83454e-11
DQA160D	207.208	5.58613e-47	DQA160A	316.804	1.20107e-25	DPB205M	403.545	1.23743e-20	DPB84G	497.193	3.76848e-22	DQA.7M	560.042	2.23139e-15
DPB205V	288.811	9.03099e-65	DQA138T	462.809	9.90707e-40	DQA560	563.625	1.00953e-23	DQB1970	616.201	4.13846e-13	DPB1940	642.483	2.9499e-07
DRB78Y	208.827	2.476e-47	DQA.7V	351.48	7.0003e-33	DPB55E	468.024	3.61258e-27	DPB194R	538.945	3.71927e-17	B116S	579.876	1.57677e-10
DQA130S	207.208	5.58613e-47	DQB185I	343.627	1.61559e-31	DPB57A	402.661	1.5493e-14	C90A	449.322	8.43908e-12	DRB13H	496.379	6.89509e-12
DQB57S	194.426	3.43796e-44	DQB70R	331.854	9.72026e-32	DPB84D	408.031	2.59294e-18	DQA47K	455.316	6.13967e-12	C219W	496.199	1.61582e-10
DQB9L	194.426	3.43796e-44	DPB57D	321.987	1.40028e-29	DQB13A	436.857	8.40333e-27	C152E	491.186	1.69532e-13	DRB58S	527.101	2.06196e-09
DQB71A	198.406	4.65342e-45	DPB11G	364.555	5.13049e-38	DQB167R	490.738	2.80433e-29	C219R	542.428	6.50046e-13	DPB76I	581.149	4.88874e-10
DPB170I	209.071	2.19106e-47	DQA.160	387.288	1.18768e-40	DRB58Y	480.037	5.93635e-22	DRB.24F	554.631	5.78109e-18	C163E	591.997	9.79227e-10
DQB57S	194.426	3.43796e-44	DQB55P	332.422	7.30281e-32	DPB36A	443.471	5.77276e-26	DPB76I	503.221	1.07718e-14	B305A	548.9	1.39294e-11
DPB178L	253.795	3.86479e-57	DQB60N	423.88	7.08894e-39	DQA187A	558.163	4.73842e-31	DQA34E	594.172	1.96338e-09	C163T	627.677	7.10981e-09
DRB.16A	209.765	1.54612e-47	DQB37Y	354.624	2.30478e-33	DPB170I	460.066	9.77191e-25	DQA40E	503.278	4.91319e-11	C116S	539.63	1.64715e-09
DQA.7M	207.208	5.58613e-47	DPB9H	379.422	2.4301e-39	DQB26L	480.131	1.0653e-23	DQA129H	537.708	3.24966e-14	DQB87Y	578.827	1.43204e-10
DQB57S	194.426	3.43796e-44	DPB11G	326.08	1.78099e-30	DRB9W	423.9	4.58273e-23	DQB2030	488.341	9.94298e-16	DQA.6M	517.947	5.2955e-08
DPB69E	205.023	1.67409e-46	DQB37Y	381.887	2.34526e-40	DQA47K	473.934	8.46457e-22	DQB1970	537.184	1.82042e-15	C114D	587.295	1.45303e-12
DQB.10S	194.426	3.43796e-44	DPB11G	330.022	2.44547e-31	DQA47K	444.8	8.80055e-27	DQA.6M	509.538	8.5567e-16	DPB215I	569.786	8.36358e-15
DQA.7V	206.778	6.9313e-47	DPB84D	354.493	5.47628e-34	DQB126Q	486.06	1.86041e-30	DQA160A	521.184	3.09384e-09	DQA560	555.054	5.89169e-09
DQA.6T	125.34	4.28898e-29	DRB86V	235.945	7.21865e-26	DPB11G	317.282	1.90401e-19	DPB170I	381.672	1.02052e-15	DRB30Y	456.223	5.9095e-18
DRB11L	170.76	5.04826e-39	DPB55E	310.526	2.995e-32	DPB194R	400.824	2.04823e-21	DQB135D	467.733	2.84331e-16	C219W	507.333	3.11794e-10
DQA160S	192.689	8.22892e-44	DQB126Q	318.946	2.70204e-29	DPB65I	415.175	1.02311e-22	DPB76I	474.511	1.32928e-14	DQA130S	520.707	1.06999e-11
DQA138T	194.916	2.68747e-44	DQB57V	344.532	2.1033e-34	DPB8L	435.4	1.53601e-21	DPB178M	504.76	8.20197e-17	DPB194R	560.985	6.46466e-14
DQA.7V	207.429	4.99838e-47	DPB65I	326.628	9.47439e-28	DRB58S	420.559	3.26582e-22	DQB185I	478.258	3.0551e-14	C116F	528.396	1.43329e-12
DPB36A	200.297	1.79893e-45	DQB70E	359.897	1.38405e-36	DQB1970	485.962	2.97504e-29	DQA11C	534.028	4.12208e-12	B.230	563.326	6.2053e-08
DPB96R	233.478	1.03979e-52	DRB30H	420.485	1.43067e-42	DQA187A	559.169	5.16378e-32	C9Y	594.381	2.95805e-09	DQB2030	625.219	2.80396e-08
DPB69K	198.947	3.54563e-45	DRB73G	377.595	9.56039e-41	DQA11Y	515.469	7.76591e-32	DPB76I	569.055	2.47509e-13	C114D	610.465	1.2345e-10
DPB69K	240.995	2.38705e-54	DRB70R	403.735	2.85013e-37	DQA53G	504.989	8.0931e-24	DQB.270	572.442	2.15708e-16	B77S	609.997	8.88805e-10
DQB26L	207.007	6.17739e-47	DPB36A	330.569	1.05081e-28	DQA.13A	416.223	2.14294e-20	DPB205M	479.195	2.09679e-15	DRB67L	530.22	9.12207e-13
DPB215I	213.495	2.37319e-48	DQB136E	386.09	2.00686e-39	DQA215F	478.189	8.24216e-22	DPB76I	559.91	1.56742e-19	DRB96E	592.553	1.10747e-08
DQB1970	205.402	1.38398e-46	DPB35L	366.181	7.64368e-37	DRB.24F	475.128	1.66718e-25	B67S	530.053	1.25187e-13	DQA160D	572.651	6.72517e-11
DRB74R	195.198	2.33206e-44	DPB8L	357.06	4.43425e-37	DQA138I	449.707	6.25014e-22	DRB31I	515.581	4.80907e-16	B143S	542.473	2.15059e-07
DPB57D	207.029	6.11073e-47	DQA.7V	370.043	2.48339e-37	DRB96E	503.009	9.19909e-31	DQB224Q	539.983	1.19725e-09	C35Q	571.078	2.45639e-08
DPB9Y	198.789	3.83818e-45	DQA560	375.383	2.68588e-40	DQB9L	505.473	3.91598e-30	DPB55A	554.22	2.91217e-12	DQA52R	595.022	1.68447e-10
DRB96H	206.958	6.3325e-47	DPB76M	395.97	5.2226e-43	DQA175E	491.12	1.76521e-22	DQA53Q	545.685	1.50374e-13	DQB140A	580.918	2.92614e-09
DRB74R	194.842	2.78897e-44	DPB11G	310.714	5.07097e-27	DQA34E	401.598	1.52326e-21	DRB58F	446.29	2.30611e-11	C73A	492.834	8.96046e-12
DQA207V	194.916	2.68747e-44	DQB.27S	351.177	7.4239e-36	DPB9Y	470.608	8.42708e-28	DQB125G	507.511	1.24152e-09	B307T	530.213	1.8917e-06
DRB13G	207.07	5.98644e-47	DQA130S	331.736	6.02274e-29	DPB8L	442.231	7.63246e-26	DQA138T	498.046	7.96318e-14	DPB205M	538.586	1.92583e-10
DQA25F	206.924	6.44275e-47	DPB9Y	393.908	1.44713e-42	DQA207V	496.412	4.30573e-24	DPB205M	573.405	1.71611e-18	DRB58F	627.629	1.78886e-13
DQA53Q	194.94	2.65508e-44	DQB56L	351.185	7.4829e-36	DPB35Y	433.558	1.12734e-19	C00	468.41	3.55616e-09	DQB70E	501.219	1.01699e-08
DQB860	194.426	3.43796e-44	DQB9Y	329.742	2.81526e-31	DPB84D	428.982	2.23752e-23	DRB51R	470.025	1.48924e-10	B114D	511.534	1.17293e-10
DQB.27A	163.72	1.74114e-37	DQA560	292.387	8.02046e-30	DPB215I	405.035	2.57751e-26	DPB35F	474.891	6.38039e-17	B282V	535.668	6.39223e-15
DRB26Y	210.819	9.10362e-48	DPB9H	380.012	1.11001e-38	DQB26L	509.5	5.30407e-30	DPB33E	574.802	6.42723e-16	C163T	630.794	7.27372e-14
DRB26L	220.175	8.2829e-50	DPB65I	370.77	1.28479e-34	DQA53Q	501.391	2.99817e-30	C156W	537.124	2.26313e-09	DQB26G	579.621	7.07891e-11
DPB65I	204.335	2.36578e-46	DQB.10S	365.409	6.59172e-37	DQA207M	458.59	4.77183e-22	DQA175E	524.825	4.00256e-16	C147L	574.228	2.08349e-12
DQB86G	194.457	3.3852e-44	DPB55E	332.798	6.13716e-32	DQB185T	442.048	1.43023e-25	DPB76I	486.009	3.3512e-11	DRB.24F	527.184	1.39132e-10
DPB9Y	207.916	3.91242e-47	DQA47K	380.741	1.7876e-39	DQB86A	492.451	4.13614e-26	DQA1K	531.929	3.31799e-10	DRB86G	571.267	3.56481e-10
DPB1940	209.026	2.24084e-47	DQB.10S	391.533	1.37399e-41	DQB87Y	491.546	1.51433e-23	C.150	532.957	1.23318e-10	B116L	566.003	9.00333e-09
DPB9H	234.793	5.37213e-53	DQB56L	405.16	6.15143e-39	DQA175E	517.84	2.53551e-26	DQA.7M	561.287	4.35577e-11	C9S	601.364	2.44158e-10
DQB38V	210.575	1.02904e-47	DRB31I	350.463	2.81587e-32	DPB215I	441.34	1.52933e-21	C24A	484.858	4.20003e-11	DRB71A	524.699	2.75571e-10
DQA1E	192.893	7.42733e-44	DQA11C	342.839	1.78123e-34	DPB35F	459.791	2.94217e-27	C285V	505.066	1.71162e-11	DQA129H	540.573	2.54151e-09
DRB96Y	196.196	1.41216e-44	DQB70G	338.529	8.22682e-33	DPB178L	455.902	2.37838e-27	DPB69E	578.729	1.52128e-28	C152A	614.121	2.69637e-09
DQA160A	196.645	1.12706e-44	DQA50L	350.954	1.98249e-35	DPB69K	455.888	1.26268e-24	DPB205M	511.432	9.14002e-14	C177E	553.297	9.78234e-11
DQB60N	194.426	3.43796e-44	DPB170I	341.053	9.46575e-34	DQB26L	450.014	1.65523e-25	DPB76I	516.938	2.8227e-16	DQA207M	556.819	2.6991e-10
DPB11G	227.568	2.02191e-51	DRB.25K	408.695	2.75001e-41	DQA.6T	499.93	1.27571e-21	DQA.7V	570.268	4.9965e-17	DPB170T	611.797	1.16169e-10
DPB69K	205.376	1.40227e-46	DQB.18A	364.775	1.5306e-36	DQA50L	469.315	1.54091e-24	DQB45E	540.63	3.04429e-17	C2750	580.315	2.98478e-10
DRB149Q	196.022	1.54172e-44	DPB55D	367.536	3.45441e-39	DQB130R	478.706	5.43209e-26	DQA560	536.138	3.49861e-14	DPB194Q	580.284	3.04764e-11
DQB860	194.426	3.43796e-44	DQA.6T	302.873	2.14519e-25	DPB205M	390.557	7.67774e-21	DPB170I	490.739	1.39039e-23	DRB38V	550.892	8.77675e-15
DQB.27S	194.426	3.43796e-44	DPB194R	334.714	2.303e-32	DQA41K	429.572	2.04505e-22	DRB74L	501.587	2.13522e-17	A19K	536.352	3.72171e-09
DRB78V	198.465	4.516e-45	DPB76M	340.971	7.5385e-33	DQB167R	451.389	7.93819e-26	C116S	509.133	2.98528e-14	DPB84G	542.075	9.49189e-09
DQB.18A	194.457	3.3852e-44	DPB69K	341.635	7.17432e-34	DQA41K	438.305	8.19019e-23	DPB35L	503.91	5.50931e-16	DRB60S	563.917	9.4511e-15
DQA41K	192.689	8.22892e-44	DQB70E	320.215	1.42538e-29	DPB205M	402.592	1.1248e-19	DPB36A	466.011	1.67067e-15	DPB84V	539.286	1.12782e-17
DQA11C	203.646	3.34344e-46	DPB178L	361.756	2.92814e-36	DQA.13A	478.517	3.23801e-27	C303A	524.954	9.46153e-12	DQB.18A	566.219	1.32934e-10
DQA.7M	192.247	1.02754e-43	DPB35F	342.788	1.32083e-34	DPB170T	453.429	7.09086e-26	DQA69T	553.388	1.5559e-23	DQA160D	610.256	4.66075e-14
DQA130S	194.916	2.68747e-44	DQB60N	351.177	7.4239e-36	DPB96R	440.918	2.71449e-21	DPB69K	559.46	1.31953e-27	DQA138T	597.246	7.89581e-10
DRB74E	194.599	3.1513e-44	DQB140A	331.726	1.13152e-31	DPB215I	436.582	1.31282e-24	DPB76I	488.27	6.50808e-13	C163T	537.29	2.53386e-12
DRB51R	198.465	4.516e-45	DQB26L	319.74	3.32688e-28	DPB960	381.783	3.36074e-15	DPB35Y	542.495	7.9096e-37	C275E	598.783	6.25813e-14
DPB69E	264.671	1.64586e-59	DQB220H	419.193	1.78136e-35	DQA47K	510.42	1.28083e-21	DQA1E	587.242	1.87069e-18	C21H	621.147	5.78707e-09
DQB9L	194.426	3.43796e-44	DQA53G	335.55	1.51115e-32	DPB76V	427.328	9.70015e-22	DPB35Y	475.05	4.91135e-12	DQB.270	505.202	3.99387e-08
DPB55A	249.65	3.09531e-56	DRB26Y	418.208	1.52841e-38	DQB57V	528.831	7.15645e-26	B116Y	567.312	5.5275e-10	DQA.6M	608.115	1.684e-10
DPB9Y	198.066	5.52034e-45	DQA47K	360.178	3.91019e-37	DQA41K	454.168	3.1702e-22	C306A	529.727	3.5479e-18	DPB960	604.416	5.50915e-18
DPB170I	252.562	7.17703e-57	DQB86G	405.575	3.80462e-35	DQA40E	550.829	1.8898e-33	DQB71T	591.71	1.61786e-10	DRB70R	618.198	2.65291e-07
DRB74R	195.353	2.15766e-44	DQB87Y	324.278	7.04202e-30	DPB35Y	417.122	5.65959e-22	C99F	478.304	5.204e-15	DPB76I	521.986	3.86316e-11
DQA.6T	192.689	8.22892e-44	DPB205M	346.317	2.79293e-35	DRB9E	463.794	2.25768e-27	DQA69T	523.598	1.04775e-14	DPB84V	573.464	1.64559e-12
DRB74L	195.118	2.42859e-44	DPB76V	344.979	1.85931e-34	DQA1K	446.663	6.50929e-24	DPB69E	512.527	4.83274e-16	DRB57S	569.323	4.83389e-14
DQB.27S	194.426	3.43796e-44	DPB36A	340.85	1.04848e-33	DQA.13A	474.154	7.75854e-31	DPB205M	556.581	1.09635e-19	C156L	593.813	1.04907e-09
DQA.13A	194.94	2.65508e-44	DQA138I	350.164	1.25114e-35	DPB215I	484.403	4.84424e-31	DPB69E	555.915	2.75519e-17	B163T	591.162	2.90517e-09
DPB170T	177.438	1.75721e-40	DRB71A	315.309	7.77736e-32	DQA41K	415.2	1.6104e-23	DRB.16A	505.383	2.1709e-21	DPB35Y	545.839	2.01121e-10
DPB65I	293.875	7.11552e-66	DQB86G	451.385	3.96131e-36	DQB70R	545.801	2.55621e-22	DQA1E	591.618	1.29878e-11	C90A	621.374	4.89788e-08
DPB194R	227.241	2.38208e-51	DQB136E	381.348	2.19476e-35	DQA.13A	475.86	2.43662e-22	DRB47F	534.167	2.2419e-14	B163L	578.789	2.38978e-11
DRB96E	194.667	3.04501e-44	DPB178L	340.079	1.74555e-33	DPB76I	455.15	7.59346e-27	DQA1K	550.613	1.50697e-22	DQA50L	614.659	1.21523e-15
DRB58F	206.866	6.63057e-47	DPB205V	305.474	3.07912e-23	DPB960	418.218	2.45412e-26	DQA.16L	485.703	2.1237e-16	DQB13A	563.284	1.2736e-18
DQB203V	198.369	4.73906e-45	DPB8L	338.163	2.95399e-32	DQB135D	431.446	4.53114e-22	C219R	490.843	1.28858e-14	DQA160D	533.173	7.71109e-11
DQA11C	187.44	1.15095e-42	DRB74L	283.966	8.80803e-23	DPB57A	349.808	4.88667e-16	DPB9Y	422.747	1.33737e-17	DQA41K	478.955	6.51794e-14
DQA.6M	192.893	7.42733e-44	DPB96K	379.76	1.53576e-42	DQA75I	486.657	4.68831e-25	DRB10Q	545.005	2.19603e-14	DRB58S	591.664	8.45056e-12
DRB38L	210.623	1.00437e-47	DQA107T	366.865	7.49498e-36	DPB35F	502.095	2.94068e-31	C248V	539.03	1.22164e-09	DQA1K	564.911	3.63089e-07
DQA.13T	194.916	2.68747e-44	DQB71A	354.885	1.14956e-36	DPB9H	434.548	4.43987e-19	DPB11G	491.817	3.80009e-14	DPB178M	547.148	1.01864e-13
DPB57E	292.942	1.13634e-65	DQB57D	463.837	4.71708e-39	DRB57A	574.025	8.91213e-26	DQA130S	628.144	1.88767e-13	C219W	674.068	1.2292e-11
DPB55D	227.797	1.8021e-51	DQB860	395.647	2.18152e-38	DQB1160	489.436	3.51058e-22	C99F	547.517	2.51587e-14	DRB70R	584.285	1.32999e-09
DRB74R	218.094	2.35546e-49	DPB205M	327.712	1.18857e-25	DQA138T	423.564	1.23793e-22	DQA.7M	476.649	3.19456e-13	C0G	518.715	8.8203e-11
DPB170I	239.749	4.46133e-54	DQA207M	395.966	7.58944e-36	DQA160A	490.106	2.93956e-22	DQA560	555.999	4.76241e-16	DQB185I	586.982	2.60249e-08
DQB57S	194.426	3.43796e-44	DPB8V	344.125	2.01672e-34	DQA207V	437.555	4.20957e-22	DQB30Y	497.46	9.95412e-15	DPB35L	547.167	1.78499e-12
DQA.6T	192.689	8.22892e-44	DPB76V	341.359	3.38659e-34	DQB57A	472.164	2.73107e-30	DQA.13T	526.908	1.37318e-13	B58A	563.827	1.23153e-09
DQA138I	192.689	8.22892e-44	DPB76M	329.455	1.35697e-31	DQA47K	433.582	1.89782e-24	DQB77R	502.791	8.85397e-17	C9D	551.914	2.4044e-12
DPB205V	225.989	4.46903e-51	DQA47K	388.629	2.99756e-37	DQB38A	491.336	3.88521e-24	DQA.7M	537.248	1.23717e-11	B97R	583.817	8.84408e-12
DPB96R	214.662	1.32066e-48	DQA130S	404.658	3.18542e-43	DQA175E	498.444	3.51503e-22	DPB205M	544.081	1.4238e-11	DQB77T	598.023	2.06479e-13
DPB194R	215.984	6.79714e-49	DRB70R	379.525	1.90638e-37	DQB125G	494.728	7.1023e-27	C90A	542.11	5.84039e-12	DQA53Q	585.665	4.12254e-11
DRB60Y	207.174	5.68033e-47	DPB84G	319.089	3.7309e-26	DQA160S	415.428	9.6766e-23	DQA11C	468.049	4.04658e-13	DQA107T	511.249	4.94112e-11
DQB30Y	198.423	4.61397e-45	DQB203V	322.571	7.81725e-29	DPB69E	419.177	8.46031e-23	DQA.7M	492.064	1.373e-17	DPB84D	552.3	8.41064e-15
DPB178L	186.419	1.92305e-42	DRB57S	336.697	1.50776e-34	DQB125A	444.015	3.7917e-25	DQA175E	498.354	1.68714e-13	C275E	530.801	1.22475e-08
DQA160S	192.689	8.22892e-44	DQB9Y	325.522	9.83583e-31	DPB76V	423.063	5.27449e-23	DPB36A	464.609	1.15161e-10	DQA53G	512.057	5.64881e-12
DPB9Y	229.722	6.85392e-52	DQA.6T	391.062	5.76676e-37	DQB26G	491.174	1.44008e-23	DPB84G	554.629	1.64111e-15	DQA160S	602.421	4.7379e-12
DPB170T	230.147	5.53638e-52	DQB70T	381.656	8.11522e-35	DQB125G	496.656	7.86724e-27	C116S	537.783	1.42629e-10	DQA160S	574.832	1.15236e-09
DPB57D	200.255	1.83694e-45	DQB136E	372.019	3.04821e-39	DQB55R	506.97	3.38402e-31	DPB205M	552.222	1.73225e-11	C219R	583.499	2.23745e-08
DRB.1S	195.065	2.49352e-44	DPB76M	339.419	2.97265e-33	DQA53Q	434.425	1.89861e-22	DQB185T	511.092	2.02289e-18	DPB35L	567.708	5.29953e-14
DPB36A	198.855	3.71209e-45	DQA160S	356.943	2.961e-36	DQB57A	470.276	1.82443e-26	DQA1K	508.602	5.985e-10	DQA.16L	542.895	4.74112e-09
DQB57D	206.738	7.0734e-47	DQA160S	342.978	1.76804e-31	DPB215I	456.777	1.44183e-26	DPB8L	530.014	1.15005e-17	DRB57V	568.005	7.10816e-10
DPB205V	197.095	8.98931e-45	DRB58F	364.334	2.96706e-38	DQB203I	489.536	4.59741e-29	DRB67I	529.216	2.99125e-10	DQA.13T	557.412	1.09634e-07
DQA.13T	207.208	5.58613e-47	DPB96R	361.944	1.59916e-35	DQA.160	465.897	2.0711e-24	DRB9E	529.223	1.75166e-15	DPB57E	572.319	5.21191e-11
DRB11L	198.112	5.39284e-45	DPB55A	345.506	6.43723e-34	DRB51R	423.276	1.15725e-18	DRB71E	492.58	8.44334e-17	DPB1780	559.045	3.56165e-16
DPB9H	240.312	3.36333e-54	DRB74R	415.403	5.7192e-40	DRB58Y	538.91	1.07976e-28	B113H	590.965	5.39612e-13	DQB136Q	628.19	1.05279e-09
DQA75I	207	6.20045e-47	DQB167R	345.123	6.84951e-32	DPB96R	435.796	1.69489e-21	C219R	489.864	1.93628e-13	DQA.7V	539.438	1.91097e-12
DQB60N	194.426	3.43796e-44	DRB13S	293.199	2.83161e-23	DQA34E	385.802	6.39126e-22	DPB205M	450.915	7.07118e-16	DPB178M	498.815	4.486e-12
DQA.7M	207.208	5.58613e-47	DPB57E	337.347	3.82013e-30	DQA1K	450.584	1.91465e-26	DQB185T	511.391	6.29523e-15	DPB96R	568.567	3.98413e-14
DQA160S	192.689	8.22892e-44	DPB194R	348.993	7.26455e-36	DQA.13T	449.765	1.03217e-23	DRB71R	533.581	5.43037e-20	DPB76V	585.201	6.73627e-13
DPB9H	286.84	2.42674e-64	DQB26L	438.76	6.59661e-35	DQA129Q	558.045	9.07329e-28	DQA.7V	595.765	8.16704e-10	C114D	624.821	7.03108e-08
DRB74E	216.432	5.42772e-49	DPB9Y	425.088	2.69909e-47	DQA75I	541.199	4.49276e-27	DPB65I	583.665	7.1934e-11	DQB86A	613.202	5.48608e-08
DQA160D	207.208	5.58613e-47	DPB55D	360.542	3.23668e-35	DQB74E	488.025	1.45654e-29	DPB84V	527.868	2.75247e-10	C116Y	564.154	1.704e-09
DPB170I	231.392	2.96316e-52	DRB38L	401.371	7.47648e-39	DQA160A	536.009	3.96199e-31	DRB71E	573.764	8.02107e-10	DPB36A	611.509	8.06512e-10
DQA138T	207.208	5.58613e-47	DQB28S	344.44	1.07265e-31	DPB65I	416.57	2.01429e-17	DPB76I	516.985	1.23628e-23	C304V	565.42	3.41431e-12
DRB31I	219.034	1.4692e-49	DPB69E	362.875	3.84866e-33	DQA.16M	474.651	4.00041e-26	DPB205M	539.843	6.79458e-16	DPB84G	580.797	1.55885e-10
DQA26S	207.429	4.99838e-47	DPB76M	376.305	1.30202e-38	DQA.7V	518.548	8.60721e-33	C49A	557.963	3.4255e-10	B307M	597.288	3.58809e-10
DQA69T	207.208	5.58613e-47	DPB76M	368.238	6.73619e-37	DQB136Q	490.473	2.05081e-28	DPB33E	558.754	1.4178e-16	DQA25F	608.791	1.50875e-12
DRB74R	194.396	3.49031e-44	DPB69E	362.908	1.56345e-38	DQB167R	472.875	9.96476e-26	B24S	541.707	1.07211e-16	DRB28D	604.962	1.8162e-15
DQA47K	192.689	8.22892e-44	DRB74A	326.658	5.55097e-31	DPB960	427.014	1.27302e-23	DPB205M	514.182	9.97007e-21	DQA107T	558.014	3.57778e-11
DPB1940	232.264	1.91237e-52	DQB60N	400.113	2.18319e-38	DQB185T	524.047	8.70868e-29	C275E	573.506	2.0257e-12	DQA.6M	607.693	5.00515e-09
DPB57D	209.82	1.50387e-47	DQB28S	372.468	2.9862e-37	DQA52R	485.957	1.68608e-26	DPB9Y	525.241	3.66451e-10	DQA.7M	560.199	3.36768e-09
DPB178L	174.276	8.61761e-40	DQB57A	316.27	9.75338e-33	DQA138T	382.3	4.44113e-16	DRB57D	464.905	1.00205e-19	DPB69E	511.018	1.11606e-11
DQB136E	194.426	3.43796e-44	DQB167R	335.564	1.50075e-32	DPB205V	426.073	1.84175e-21	DRB26F	477.721	6.639e-13	DQA75I	511.83	5.21179e-09
DPB35F	182.376	1.46811e-41	DQA.16L	324.838	7.70366e-33	DQB55P	401.776	1.76448e-18	DPB57A	477.336	3.54428e-18	DQB30H	518.717	1.25257e-10
DQB9F	168.392	1.66118e-38	DPB35Y	294.511	2.89587e-29	DPB178L	378.552	4.84691e-20	DRB58A	464.389	1.95309e-20	DRB96H	535.66	3.1151e-17
DQB45E	195.174	2.36103e-44	DPB69K	327.98	9.96635e-31	DQA129H	445.673	2.02491e-27	DQA.13T	499.112	2.66638e-13	C11A	541.905	6.08567e-11
DQA138T	207.208	5.58613e-47	DPB35F	327.16	6.47955e-28	DQA207M	429.049	5.87307e-24	DPB57A	518.193	3.67087e-21	DQB136E	572.24	1.95715e-13
DQB.18V	196.128	1.46193e-44	DQA.13A	353.963	3.36188e-36	DPB170I	466.503	2.72084e-26	DPB194R	505.211	4.92389e-10	DPB69E	538.054	9.98798e-09
DQB860	194.426	3.43796e-44	DPB170T	330.269	2.15974e-31	DQB1970	396.245	4.56436e-16	C77N	456.562	8.07251e-15	DQA.16L	495.115	5.32875e-10
DPB35F	193.142	6.55475e-44	DQB185I	345.415	5.52281e-35	DQA560	463.369	1.77471e-27	DQA138I	503.862	1.97308e-10	DQB26G	538.387	4.20723e-09
DQB.18A	198.369	4.73906e-45	DPB76M	308.973	7.22795e-26	DQA1K	415.484	5.69593e-25	DQA138T	493.718	9.152e-19	DPB35L	546.355	4.01351e-13
DQB203V	194.457	3.3852e-44	DQB70R	341.491	7.71325e-34	DPB55D	421.188	4.36534e-19	DPB76V	486.29	7.11229e-16	C77S	540.62	1.69425e-13
DRB85A	206.914	6.47481e-47	DPB9H	353.992	7.5429e-34	DQB136Q	439.708	2.07807e-20	DPB11G	517.469	1.16246e-18	C152A	566.912	2.0429e-12
DQA.6T	192.689	8.22892e-44	DPB205M	303.746	5.74923e-26	DPB170T	422.529	1.16872e-27	DRB58Y	506.572	4.83978e-20	DQB57D	553.166	8.73288e-12
DPB55A	180.316	4.13453e-41	DQB87F	312.527	1.34511e-30	DRB70D	425.412	2.28682e-26	DQB1670	490.476	7.25152e-16	C177E	526.849	1.62912e-09
DRB78Y	204.161	2.58076e-46	DQA53G	339.252	3.15411e-31	DPB194R	436.559	5.93764e-23	DRB70R	478.791	8.10772e-11	DPB96R	509.599	2.84882e-08
DQB55R	196.584	1.1624e-44	DQA.7M	325.552	6.89223e-30	DPB84G	430.277	1.40297e-24	DQA.13T	486.095	7.94986e-14	DRB70D	530.042	3.37375e-11
DPB9Y	198.571	4.28279e-45	DRB13H	343.309	2.44996e-33	DQA.16M	460.475	2.6399e-27	DPB35L	500.101	3.07554e-10	DQA160S	535.633	2.50921e-09
DRB.16A	217.793	2.73985e-49	DQA.13T	362.364	2.6656e-33	DPB96K	472.873	7.57868e-26	DPB76V	527.888	1.19623e-13	DPB170T	570.667	6.12932e-11
DPB57E	185.102	3.72837e-42	DQB224Q	330.642	1.63613e-33	DQB1970	396.264	5.46402e-16	DQB71A	494.479	3.75367e-23	DRB58D	526.629	1.42673e-08
DRB77T	210.77	9.32806e-48	DPB11G	386.778	3.60644e-40	DQA130S	479.113	7.31812e-22	DQB9F	546.865	1.85489e-16	DPB96R	595.386	3.2665e-12
DQA.6M	207.208	5.58613e-47	DRB58A	343.338	1.86885e-31	DPB65I	445.519	5.06592e-24	DQA129Q	509.811	1.07315e-15	DPB35L	560.441	1.11494e-12
DQB9L	194.426	3.43796e-44	DQB70R	327.278	9.73938e-31	DPB205V	426.19	2.63982e-23	DQA160D	480.109	2.0891e-13	C116S	535.767	8.62795e-14
DPB84D	198.062	5.53151e-45	DQA.7M	342.581	2.73535e-33	DRB26F	443.127	1.15675e-23	DQA25F	497.137	1.9945e-13	C306V	551.969	1.31283e-13
DPB96K	216.123	6.34054e-49	DQB9L	386.09	7.52307e-39	DQA47K	475.361	3.44246e-21	DQA.7V	538.513	1.91369e-15	C103L	587.421	2.68271e-12
DQB185I	195.174	2.36103e-44	DQA47K	303.417	2.37769e-25	DPB76I	373.042	7.17003e-17	DPB57A	456.04	8.21526e-20	DRB57D	510.447	1.62936e-13
DQA47K	192.689	8.22892e-44	DPB96R	338.722	1.2773e-33	DQA1K	433.581	2.04355e-22	DQA34E	501.907	1.38592e-16	DPB205M	561.413	1.21922e-14
DQA138I	192.689	8.22892e-44	DQB135D	317.397	5.89595e-29	DPB69E	393.445	2.76883e-18	DPB35L	507.453	1.29818e-26	C99Y	566.943	1.22899e-14
DRB28E	208.372	3.1126e-47	DPB9H	349.799	1.29771e-32	DQA160A	443.883	3.02419e-22	DQA560	507.957	1.19784e-15	DRB70D	544.352	1.61151e-09
DQB9L	194.426	3.43796e-44	DQB224Q	341.8	6.50201e-34	DPB178L	438.577	7.75898e-23	C77N	489.909	7.79696e-13	DQA160S	532.496	6.76304e-11
DPB11G	288.747	9.32549e-65	DQB9L	443.213	1.83137e-35	DQB26L	532.626	3.20462e-21	DRB57S	571.096	5.5609e-10	A70H	602.774	1.81943e-08
DQA138T	207.208	5.58613e-47	DQB55P	350.966	4.01259e-33	DPB76I	431.485	2.87847e-19	C306V	485.302	2.2006e-13	C14R	513.385	1.16256e-07
DQA138I	192.689	8.22892e-44	DPB96R	342.106	2.32548e-34	DQA175E	437.728	1.39006e-22	DPB11G	507.152	7.94444e-17	C.150	566.405	1.38615e-14
DRB57S	217.065	3.94917e-49	DPB96K	371.552	1.81292e-35	DQA.7V	483.402	3.8534e-26	DPB35F	557.44	7.66294e-18	DQA129Q	594.27	1.28895e-09
DPB36A	196.643	1.12838e-44	DQB57D	373.225	2.70217e-40	DQA1K	486.481	1.89662e-26	DQA160S	533.192	8.22423e-12	C97R	566.723	7.01681e-09
DRB.24F	195.065	2.49352e-44	DQB87Y	317.637	1.73025e-28	DPB194R	430.565	2.23786e-26	DQA.6T	492.641	3.3036e-15	B275E	545.805	3.06918e-13
DQA175E	205.38	1.39941e-46	DQB57V	364.8	1.51425e-36	DPB215I	493.023	1.00361e-29	DQB66D	542.086	2.47791e-12	DPB65I	571.505	5.82979e-08
DQA160A	200.991	1.26906e-45	DQA41K	355.928	1.44573e-35	DPB9Y	457.778	5.98936e-24	C304V	493.434	2.35379e-09	B178K	522.074	8.71809e-08
DPB96K	280.437	6.03206e-63	DQB28S	442.828	3.39782e-37	DQB70R	517.564	5.38007e-18	C184H	581.672	1.17783e-15	DRB.1S	627.333	1.40573e-11
DQB56L	194.426	3.43796e-44	DRB58A	333.818	3.61586e-32	DPB205M	448.629	8.65602e-27	DPB76V	496.732	4.04377e-12	DQA53Q	534.64	7.41777e-10
DRB.16A	196.101	1.48148e-44	DQA.16L	325.81	4.74601e-30	DPB55A	421.25	1.52399e-22	DQA.6T	476.292	1.17966e-13	DPB69K	525.123	2.79069e-12
DPB194R	202.435	6.14403e-46	DQB89G	358.969	6.4719e-36	DRB85A	475.291	4.04092e-27	DQA130S	541.736	3.59742e-16	C.17T	596.688	1.23521e-13
DPB55D	208.837	2.46332e-47	DRB57A	378.115	1.06414e-38	DQA.16M	516.728	5.35141e-32	DQB70E	552.469	2.25393e-09	DRB670	583.493	2.54826e-08
DQA.7M	207.208	5.58613e-47	DQA129H	362.07	1.50023e-35	DPB96R	471.306	1.44114e-25	DPB194Q	536.022	8.65182e-16	DQA40E	562.707	2.39478e-07
DPB69E	196.153	1.44339e-44	DRB10T	355.74	1.39298e-36	DQB71T	469.592	1.40353e-26	DPB57A	530.613	5.64953e-15	C163T	583.402	3.71268e-13
DQA160S	192.689	8.22892e-44	DQB57D	325.392	1.05037e-30	DPB55D	445.05	7.51532e-28	DPB194Q	500.972	7.54176e-14	DRB47F	544.259	4.72633e-11
DQA11C	204.223	2.50246e-46	DPB55D	367.137	2.61186e-37	DQB53L	506.953	2.92087e-32	DPB11G	557.92	9.39347e-13	DQA25F	598.38	2.00637e-10
DPB69E	286.684	2.62537e-64	DQA1K	447.393	7.91776e-37	DQB185T	563.538	4.41845e-27	C2750	609.341	1.30732e-11	DQA160D	655.543	1.06681e-11
DQA53Q	206.924	6.44275e-47	DPB9Y	375.836	1.27876e-38	DQA41K	471.076	1.6858e-22	DPB205M	530.516	1.26083e-14	B66K	578.609	4.06464e-12
DPB55A	194.988	2.59142e-44	DQA130S	374.052	7.76183e-41	DQA69T	497.939	8.91694e-29	C219W	543.125	1.79147e-11	DPB65I	580.571	9.39809e-10
DQB1160	160.775	7.66088e-37	DQB2030	273.361	2.65904e-26	DPB178M	354.027	2.67273e-19	DPB205M	425.668	2.58192e-17	DPB36V	484.583	1.64633e-14
DPB205V	197.032	9.27979e-45	DQB1160	325.741	7.85289e-30	B2820	369.64	3.45754e-11	DRB77T	415.326	1.38799e-11	B163T	461.882	8.9047e-12
DRB71A	211.207	7.49019e-48	DQB13G	337.759	2.32798e-29	DPB55D	438.092	1.2881e-23	DPB205M	494.986	4.60103e-14	C156W	539.502	2.52296e-11
DQB70R	196.925	9.79224e-45	DPB33E	301.211	1.75119e-24	DQA.13T	383.852	9.84171e-20	C303A	447.755	1.30664e-15	DPB57A	495.5	4.85347e-12
DQA138I	192.689	8.22892e-44	DRB13S	312.419	7.25047e-28	DPB35L	402.832	1.9324e-21	DQA.7V	461.531	1.83751e-14	DPB65I	502.197	1.80627e-10
DPB8L	231.086	3.45622e-52	DQB9L	394.526	2.0045e-37	DQB66D	498.662	1.8892e-24	DPB69E	537.691	4.17476e-10	DRB13H	570.77	8.84717e-09
DRB9K	195.065	2.49352e-44	DQB66E	330.298	2.93636e-31	DPB205V	424.54	2.79213e-22	DQA160D	462.431	7.482e-10	C156R	500.693	6.18314e-10
DQA207V	192.893	7.42733e-44	DQB203V	321.231	9.46786e-30	DPB57A	396.797	3.53467e-18	DPB55E	445.139	3.57967e-12	DQB130R	488.524	4.49467e-11
DPB55A	229.575	7.37776e-52	DQA53G	413.986	5.27871e-42	DRB58Y	500.629	1.29975e-20	DQB136Q	565.271	8.98403e-16	DPB57E	598.643	7.61005e-09
DPB215I	233.176	1.21007e-52	DQB9L	396.675	1.94567e-37	DQB.10A	499.225	4.20707e-24	C156W	550.55	7.82526e-13	DRB58N	581.181	3.12059e-08
DQA.6M	207.208	5.58613e-47	DQA.7M	314.632	3.59403e-25	DRB60S	401.402	1.21903e-20	DPB9H	454.135	3.82023e-13	DPB55E	496.465	7.71027e-11
DPB84D	220.388	7.44357e-50	DQB.18A	380.129	1.28912e-36	DQA69T	457.035	1.79283e-18	DQA.7M	527.325	5.11883e-17	DPB36A	591.716	1.02014e-15
DQB57V	198.385	4.7012e-45	DRB71A	312.56	1.19344e-26	DPB36A	390.776	9.23448e-19	DPB178M	481.024	2.10111e-21	DQA160S	545.4	1.02788e-15
DQA.6M	207.208	5.58613e-47	DQB2030	322.038	8.57124e-27	DPB76M	389.145	2.57235e-16	DQA160A	455.583	3.61093e-16	DPB76I	514.063	2.05295e-14
DQB197S	210.435	1.10417e-47	DPB36A	375.868	7.35517e-38	DQB9L	473.604	4.78121e-23	DQA207V	539.961	3.76286e-16	DPB84D	606.393	3.62042e-16
DQA.7M	194.916	2.68747e-44	DQB136E	351.177	7.4239e-36	DPB9Y	451.847	1.08667e-23	C73A	502.387	1.16759e-12	DPB55A	548.181	1.31371e-11
DQB.27S	194.426	3.43796e-44	DQB185T	310.411	4.7899e-27	DPB9H	395.451	2.92363e-20	DPB55E	473.501	1.00467e-18	DRB32H	531.606	2.48512e-14
DPB84D	203.101	4.39775e-46	DQB13G	361.059	3.16046e-36	DRB58A	452.922	9.28651e-22	DQA.7M	496.165	4.83476e-11	DQB1970	538.764	6.72118e-11
DRB96Y	195.549	1.95507e-44	DQB26L	333.163	8.85097e-32	DPB11G	453.51	5.31134e-28	DQA34E	505.755	4.89956e-13	B116S	541.622	2.11279e-09
DQB185I	199.095	3.29025e-45	DPB55A	329.885	2.75265e-30	DQB9Y	454.577	5.94571e-29	C177E	500.179	1.44891e-11	DQA69T	539.614	3.3915e-10
DQA1K	192.689	8.22892e-44	DPB69E	309.769	2.75706e-27	DQB71T	412.654	3.55276e-24	DPB215I	475.093	2.74745e-15	DQA.13A	528.176	3.1983e-13
DPB57D	260.693	1.2121e-58	DQA.7M	415.128	1.85988e-35	DQA41K	506.851	9.96977e-22	DQA1K	564.292	3.48425e-14	DPB35Y	602.891	5.20317e-10
DRB71A	202.515	5.90278e-46	DPB178L	342.041	3.37972e-32	DQB30Y	437.369	1.6128e-22	DPB9Y	506.537	9.0432e-17	DRB31I	551.13	2.42554e-11
DQA1E	207.208	5.58613e-47	DQA50L	362.319	1.3241e-35	DPB35L	455.167	5.64512e-22	DQB135D	489.575	4.46999e-09	C9S	516.13	2.56065e-07
DQA.6T	192.689	8.22892e-44	DQB70G	318.276	3.78733e-29	DPB170I	418.642	1.26685e-23	DQA1K	478.381	1.08292e-14	C306V	538.388	9.45346e-15
DRB.16V	205.601	1.25211e-46	DQA50L	363.5	3.25674e-36	DPB9H	418.267	1.35692e-13	DPB11G	503.202	3.08266e-20	DPB57A	564.402	5.15563e-15
DQA160S	192.689	8.22892e-44	DPB65I	346.366	2.72484e-35	DRB74R	423.177	1.88132e-18	DQB203V	489.311	4.21388e-16	DPB178L	535.043	1.3555e-11
DRB96H	217.289	3.52928e-49	DQB87Y	347.001	4.7382e-30	DPB84G	439.805	5.77486e-22	DRB67F	500.915	5.39654e-15	DQA69T	530.77	4.65617e-08
DQA160A	202.242	6.7705e-46	DPB55A	333.121	2.63096e-30	DQB26G	431.658	3.19088e-23	C77N	474.247	6.75192e-11	DQB70E	513.092	4.58858e-10
DRB10E	195.065	2.49352e-44	DQA207V	303.982	1.69206e-25	DQB13A	388.386	4.03369e-20	DPB960	449.343	5.83379e-15	DPB11G	507.275	2.71362e-14
DRB38V	221.585	4.07964e-50	DQA69T	322.934	7.71316e-24	DPB96R	413.147	2.13842e-21	DPB9Y	519.581	5.92276e-25	DRB58N	579.383	1.04932e-14
DRB.25K	207.535	4.73793e-47	DQA.16M	316.667	1.51876e-25	DPB170T	387.737	3.44697e-17	DRB11P	449.331	4.22211e-15	DPB57A	489.443	2.39827e-10
DPB65I	229.621	7.21005e-52	DQB74E	378.383	3.23325e-34	DRB58F	473.104	2.19182e-22	DRB960	513.805	1.77369e-10	C152E	549.302	2.55464e-09
DRB11G	195.065	2.49352e-44	DPB35Y	332.561	9.39157e-32	DRB51R	431.251	2.9534e-23	DQA34E	497.623	3.73475e-16	DPB76M	538.851	1.35405e-10
DRB85A	207.097	5.90573e-47	DPB96R	368.607	5.29209e-37	DPB194Q	445.986	1.41156e-18	DQB70R	516.762	4.00189e-17	B116S	564.757	4.27243e-12
DPB178L	211.292	7.17771e-48	DRB26Y	368.539	4.52118e-36	DQB26G	477.105	2.01995e-25	DQA207M	518.279	1.39276e-10	DQB1970	568.616	1.29438e-12
DQB57D	201.65	9.11361e-46	DQA41K	339.314	8.63222e-32	DPB76M	423.387	4.76836e-20	DQA47K	479.138	8.226e-14	DPB170T	523.184	3.20791e-11
DPB84D	232.349	1.83226e-52	DQB.10S	385.321	3.88668e-35	DQA207M	479.806	2.46937e-22	DQB71T	563.854	4.82855e-20	DPB215I	610.903	6.92404e-12
DQA25F	204.304	2.40285e-46	DPB1940	320.083	5.31158e-27	DQA53Q	424.371	1.74998e-24	DQB.270	505.186	2.47795e-19	DPB76I	569.758	9.30666e-16
DQA25F	207.429	4.99838e-47	DPB84G	373.839	4.50094e-38	DQB70R	488.326	1.01911e-26	C152E	548.976	6.81961e-15	DQA.7V	600.165	8.38679e-13
DQA207V	207.208	5.58613e-47	DPB178L	364.256	4.99567e-36	DQA160D	460.105	1.24002e-22	DPB11G	538.134	1.015e-18	DQA.13T	605.732	2.00482e-16
DRB70R	207.139	5.78134e-47	DQA53G	329.577	1.85112e-28	DPB9Y	414.472	3.14671e-20	DRB31I	480.94	3.55693e-16	DQB185T	516.04	3.13056e-09
DPB215I	245.974	1.96006e-55	DQB57S	399.94	2.3559e-35	DQA.6T	496.383	9.18191e-23	DQA.7M	561.703	6.3682e-16	B158A	596.486	3.68552e-09
DQA53Q	204.304	2.40285e-46	DQA52R	336.077	1.6774e-30	DPB215I	438.851	3.75558e-24	DPB170T	503.161	1.06319e-15	DQB9F	540.119	1.20722e-09
DRB.25K	204.751	1.91929e-46	DPB170I	344.76	2.64983e-32	DQB26L	435.458	1.6739e-21	DPB76V	522.801	9.12077e-21	DRB31I	566.547	3.74033e-11
DQA53G	199.881	2.2167e-45	DPB178L	366.751	3.57288e-38	DRB60S	487.358	4.65631e-28	B95L	524.686	9.98563e-10	DRB74L	554.844	3.98256e-08
DPB55D	204.823	1.85076e-46	DQA207M	373.369	1.53769e-38	DQA69T	465.939	6.49794e-22	DQA.16M	531.687	5.1249e-16	DRB85V	576.211	2.5118e-11
DPB76V	246.923	1.21707e-55	DRB11L	419.499	2.02567e-39	DQB140A	544.472	5.15921e-29	C73A	589.823	1.64713e-11	DRB.24F	629.076	3.72158e-10
DQB203V	195.143	2.3979e-44	DQB30Y	338.415	5.1247e-33	DPB194R	406.38	1.66445e-16	DQA47K	474.549	1.50087e-16	C77N	514.939	2.07974e-10
DQB57S	194.426	3.43796e-44	DQB57D	318.117	9.84356e-29	DPB96R	400.935	8.99468e-20	B24A	443.364	7.33154e-11	C116Y	495.566	5.00803e-13
DPB36A	213.867	1.96875e-48	DQB.27S	388.488	7.24332e-40	DQA52R	489.047	1.14921e-23	DQA69L	542.857	2.20892e-13	DPB55E	589.058	1.06704e-11
DRB149Q	196.479	1.22505e-44	DPB69K	331.517	3.23923e-31	DQB87F	435.853	1.70755e-24	DQA207V	474.93	4.07501e-10	A90A	501.162	3.02797e-07
DPB65I	222.631	2.41264e-50	DQB9L	386.672	1.48222e-37	DRB58N	490.706	1.9885e-24	DQB38A	545.445	1.37649e-13	B63E	576.382	2.66463e-08
DQB.18A	158.205	2.79199e-36	DPB178L	283.835	3.70457e-29	DRB26L	383.949	1.43904e-23	DRB86V	449.98	4.43881e-16	DPB205V	497.63	5.09317e-12
DPB1940	193.902	4.47253e-44	DQB57A	352.858	1.91335e-36	DPB69E	463.097	8.68941e-26	DQA50L	528.662	5.62213e-16	DQB185T	572.232	4.08917e-11
DQA75I	207	6.20045e-47	DPB205V	328.836	2.50754e-28	DQA138I	429.725	9.72621e-24	DPB35F	502.532	1.43017e-17	DQA25F	565.823	1.78276e-15
DRB58F	195.661	1.84818e-44	DPB205M	350.932	1.22172e-35	DQA34E	487.644	1.39432e-31	C97R	546.685	1.54402e-14	DRB38V	587.063	2.09319e-10
DQA.13A	207.429	4.99838e-47	DQA50L	369.065	4.96717e-37	DPB178L	496.703	1.34738e-29	DQB66D	544.049	5.94826e-12	C184H	583.668	3.08671e-10
DQB57S	194.426	3.43796e-44	DQB136Q	327.012	1.11389e-30	DPB57E	424.885	4.45927e-23	DPB76I	489.798	7.8287e-16	DQA207M	530.748	1.56174e-10
DQB70T	194.426	3.43796e-44	DPB84D	344.932	1.34384e-34	DQA.13A	474.958	4.04519e-30	DPB194Q	541.644	3.18371e-16	DQA560	589.884	3.77129e-12
DRB11P	209.747	1.56009e-47	DQB182S	347.945	6.59461e-32	DPB84D	461.58	1.56678e-26	DPB194Q	512.277	1.07739e-12	DRB10E	548.239	2.01249e-09
DQB203V	194.457	3.3852e-44	DPB69K	329.064	4.02381e-31	DQB140A	457.148	1.07589e-29	DPB8L	520.774	1.50421e-15	C95L	580.849	9.13161e-15
DQA215F	202.887	4.89698e-46	DPB76M	348.461	1.60869e-33	DRB74E	482.909	4.35892e-31	B77N	520.312	9.6096e-10	DQA25F	551.568	2.2606e-08
DPB205V	273.401	2.059e-61	DQB125G	423.519	1.63359e-34	DQA130S	512.932	3.20519e-21	DRB86G	560.438	5.48214e-12	DRB10Q	603.676	4.8469e-11
DPB194R	260.227	1.53097e-58	DRB57S	427.794	2.51582e-38	DQB167R	523.978	1.04706e-22	DRB670	576.147	5.09113e-13	B113H	625.626	2.00456e-12
DRB74L	207.364	5.16465e-47	DPB178L	366.001	2.24567e-36	DQA138I	463.791	4.65159e-23	DQB70T	524.832	5.59059e-15	DPB96R	566.513	1.07472e-10
DQB224Q	192.41	9.46923e-44	DQA.7M	315.83	1.12837e-28	DPB76I	406.635	1.58529e-21	DPB84D	487.917	1.95716e-19	A114R	523.395	2.57911e-09
DQA34E	177.642	1.5861e-40	DRB38L	296.781	9.76533e-28	DPB11G	390.597	3.46099e-22	DQA207M	464.594	7.82592e-18	B24A	526.695	3.26266e-15
DPB8L	207.584	4.62259e-47	DQA.6T	320.659	2.07827e-26	DRB71E	421.766	8.71349e-24	DPB84V	486.1	1.05007e-15	DQB71T	531.02	2.05287e-11
DQA207V	207.208	5.58613e-47	DQB220R	343.322	1.88386e-31	DPB55D	444.699	7.60378e-24	DQA47K	484.25	3.19491e-10	DRB70Q	524.685	2.03268e-10
DQB86G	195.143	2.3979e-44	DQA160A	332.411	1.05378e-31	DPB65I	405.762	1.08518e-17	DPB11G	482.731	1.73671e-18	DPB205M	546.642	1.30157e-15
DRB11L	218.127	2.317e-49	DQA53G	348.968	2.68293e-30	DPB170T	405.65	5.12346e-14	DPB65I	459.876	1.78713e-13	DQA69T	500.694	1.67058e-10
DRB51T	194.981	2.60087e-44	DRB67I	321.867	1.96744e-29	DPB205M	408.31	1.43831e-20	DPB84D	452.751	2.62179e-11	C152E	490.816	6.844e-10
DQB57S	194.426	3.43796e-44	DPB9H	349.485	1.35946e-35	DQB185T	446.049	8.63852e-23	DQA52R	516.433	4.88175e-17	C73A	587.799	2.96663e-17
DQB86G	194.55	3.22947e-44	DRB70R	334.925	2.20424e-32	DPB8L	414.688	4.22083e-19	DQB38A	468.12	2.67775e-13	B116L	499.402	2.23091e-08
DPB8L	247.01	1.16471e-55	DQB86G	413.684	3.94122e-38	DRB28D	534.72	3.75248e-28	DQA107T	573.058	5.95132e-10	DRB.1A	603.759	3.00938e-08
DPB9Y	206.229	9.13258e-47	DQB.18A	370.8	1.13516e-37	DQA107T	511.324	2.04496e-32	C1840	546.42	3.13765e-09	DPB170T	579.822	7.49394e-09
DRB71K	187.88	9.22571e-43	DRB67F	356.636	1.38369e-38	DPB76M	446.353	2.74678e-21	B9Y	490.62	2.865e-11	DPB55E	527.928	1.00884e-09
DQA53G	204.066	2.70767e-46	DQA50L	359.442	1.15888e-35	DPB57E	473.384	1.34147e-26	DPB194Q	541.556	1.49887e-16	DQB167R	593.307	6.29935e-13
DRB30H	207.475	4.8837e-47	DQB57V	335.761	9.71672e-30	DPB9H	409.909	7.25037e-18	DQA160S	458.639	2.93651e-12	C156L	503.888	1.73501e-11
DQB.10S	194.426	3.43796e-44	DPB35L	334.543	2.50995e-32	DRB74A	407.22	1.52655e-17	DQB26G	466.423	1.42266e-14	B116S	508.846	7.3515e-11
DQA1E	207.208	5.58613e-47	DQB30Y	337.864	2.9443e-30	DPB205M	431.689	3.4458e-22	C116F	505.5	8.59663e-18	DPB35F	545.887	2.08396e-10
DQB136E	194.426	3.43796e-44	DPB76I	328.629	4.932e-31	DPB96K	429.922	7.93335e-24	DQB.10A	504.719	5.21735e-18	DQA11C	555.105	1.2629e-12
DQA187A	204.454	2.22827e-46	DQB86A	335.832	2.04672e-30	DPB194Q	388.342	4.2798e-13	DPB69E	442.636	1.72663e-13	DQA1K	489.49	7.64756e-12
DRB70R	198.308	4.88695e-45	DPB69E	329.047	2.82356e-30	DQB185T	449.88	4.1574e-28	DQA.13A	507.914	2.5761e-14	C152A	547.649	2.90904e-10
DQB60N	194.426	3.43796e-44	DPB76V	337.803	4.86158e-33	DQB77R	449.447	4.27499e-26	C163T	502.715	2.91137e-13	DPB170T	549.232	9.08029e-12
DPB57D	253.079	5.53628e-57	DQA160S	420.986	2.1196e-38	DQA.16M	535.583	9.6427e-27	DQA.13A	576.192	1.86008e-10	B275E	608.424	1.36787e-08
DRB70R	198.213	5.12721e-45	DQA53G	355.516	4.39346e-36	DPB57E	448.682	4.80931e-22	DPB205M	490.068	1.24948e-10	DPB76M	532.217	8.45583e-11
DQB860	194.426	3.43796e-44	DPB194R	318.078	1.00394e-28	DQB70R	428.753	6.97133e-26	C116S	501.097	1.80737e-17	DQA75I	549.758	3.0423e-12
DPB9H	240.941	2.45145e-54	DQB.27S	401.238	9.74856e-37	DQA160D	524.322	1.33613e-28	DQB.270	564.088	2.86349e-10	DPB57A	589.5	4.63154e-07
DQB136E	194.426	3.43796e-44	DQA69L	332.551	6.84232e-32	DPB84D	438.247	8.59575e-25	DPB35L	478.853	1.86213e-10	DRB31I	520.774	9.50396e-11
DRB.16A	216.736	4.66002e-49	DQB2030	347.45	2.85987e-30	DPB9H	451.878	1.63034e-24	DPB84V	498.821	7.30751e-12	C73A	539.299	1.98771e-10
DQB60N	194.426	3.43796e-44	DPB8L	334.072	3.1806e-32	DQB140A	453.858	7.04867e-28	DQA.7M	504.9	9.03851e-13	C2750	558.002	3.16814e-13
DQA.6M	194.916	2.68747e-44	DRB57A	352.144	4.56437e-36	DPB55D	469.066	2.9852e-27	DRB58Y	519.107	1.50583e-12	DPB57E	554.084	3.3358e-09
DQA.7M	207.208	5.58613e-47	DPB76M	351.099	3.7523e-33	DRB58Y	455.033	2.09163e-24	DPB170T	538.09	7.97466e-20	DQB86A	600.027	3.54498e-15
DQB.10S	194.426	3.43796e-44	DQB87F	321.351	1.92945e-29	DPB84G	376.853	9.33301e-14	DPB170I	416.126	3.68548e-10	DPB76V	490.456	6.61006e-18
DQB87F	199.469	2.7278e-45	DPB205V	347.245	5.30757e-34	DQA160D	443.807	8.65191e-23	DQA129H	494.73	9.60508e-13	DPB33E	543.024	3.66818e-12
DQB30Y	186.676	1.69033e-42	DRB51R	269.586	8.58441e-20	DPB9Y	341.864	1.86998e-17	DPB69E	435.438	3.91255e-22	DQA160S	496.159	6.57645e-15
DRB31I	198.258	5.01197e-45	DQA160S	306.49	2.39079e-25	DPB205M	406.858	1.26554e-23	DPB57A	499.172	7.39714e-22	DRB58N	557.271	2.49213e-14
DPB215I	243.265	7.63439e-55	DQA26S	399.022	9.56784e-36	DQB57A	507.755	1.85707e-25	DRB67F	550.492	6.26012e-11	C95L	579.686	6.54897e-08
DQA69T	194.916	2.68747e-44	DQA1K	350.155	1.24143e-35	DPB69K	476.442	2.66137e-29	C66K	509.062	1.12043e-08	DPB55A	542.587	7.03723e-09
DRB60Y	205.603	1.25061e-46	DQA160A	334.058	8.92782e-30	DPB69K	448.567	1.008e-26	DPB205M	534.511	1.85055e-20	DRB70D	583.403	2.70559e-12
DQB70T	194.426	3.43796e-44	DPB9H	324.751	3.47925e-30	DQA1K	436.321	4.43712e-26	DPB36A	521.461	2.78002e-20	DQA47K	584.547	1.97877e-15
DQA69T	192.346	9.7774e-44	DQB140T	314.505	2.13045e-28	DPB76M	402.095	8.05617e-21	DPB178L	452.312	1.37591e-12	DPB96K	505.42	3.15774e-13
DQB136E	194.426	3.43796e-44	DPB57D	332.907	5.72119e-32	DQA.13A	420.063	1.00276e-20	DRB13S	474.386	1.70055e-13	DQA11C	514.931	1.92216e-10
DPB205V	205.816	1.12417e-46	DQA130S	380.942	5.61855e-40	DRB.16V	518.306	1.00394e-31	DRB70D	570.188	5.89463e-13	B95L	593.344	1.49364e-06
DQB70E	194.55	3.22947e-44	DPB55E	320.082	3.89308e-29	DQB26L	419.704	1.84492e-23	DPB170T	485.363	5.36104e-16	DRB58A	542.849	3.40349e-14
DQB.18A	198.369	4.73906e-45	DQA175E	331.224	9.72619e-31	DPB55D	413.489	1.19006e-19	C116S	492.63	5.78294e-19	DPB57D	546.694	1.94066e-13
DQA207M	192.689	8.22892e-44	DPB960	317.715	5.02384e-29	DQB87F	427.2	1.27086e-25	DPB35Y	492.992	5.00966e-16	C261V	531.233	6.25373e-10
DQB57S	194.426	3.43796e-44	DQB57D	349.615	1.27298e-35	DPB9H	454.782	1.12266e-24	C97R	514.842	9.19979e-15	DPB84D	560.181	1.65745e-11
DQB136E	194.426	3.43796e-44	DPB84G	331.704	1.04841e-31	DQA1K	443.201	4.60538e-26	DQB55R	510.212	2.69996e-16	C152E	546.218	1.96642e-09
DQB136E	194.426	3.43796e-44	DPB55D	351.212	5.70066e-36	DRB.1S	428.55	1.44042e-18	DQB2030	500.258	2.4959e-17	DQB1160	529.712	5.72486e-08
DQA130S	207.208	5.58613e-47	DPB57D	402.544	2.17548e-44	DQB125G	501.621	2.42917e-23	DQA160D	571.839	5.30926e-17	B70K	616.625	2.19753e-11
DQA160D	194.916	2.68747e-44	DQB70T	351.177	7.4239e-36	DPB96R	477.349	2.81914e-29	DPB33E	551.452	7.4174e-18	A9F	578.459	2.02722e-07
DRB58N	217.878	2.62576e-49	DPB35F	360.32	7.78485e-33	DQA.6T	451.883	1.08072e-21	DRB.24L	516.537	8.93059e-16	DPB76V	548.224	1.81078e-08
DQA138T	194.916	2.68747e-44	DQB57S	351.177	7.4239e-36	DPB84G	426.204	4.64349e-18	DQB130R	494.607	1.33256e-16	DPB1780	562.758	1.51461e-16
DQB86G	192.216	1.0438e-43	DQB136Q	327.413	2.99021e-31	DPB178L	421.211	3.49475e-22	C116S	486.805	5.53938e-16	DPB69K	532.6	1.31331e-11
DPB9H	255.042	2.06711e-57	DQB30H	424.197	1.1314e-38	DQB9L	535.048	6.37849e-26	C116F	585.763	1.06794e-12	DQA.6T	628.465	6.37458e-11
DPB205V	234.938	4.99385e-53	DQA53Q	410.076	5.58658e-40	DRB.25K	543.478	7.38486e-31	DPB57A	594.474	9.25316e-13	B156R	626.984	1.1862e-08
DRB96E	207.525	4.7634e-47	DQB87F	329.229	2.67962e-28	DPB84V	398.115	1.04297e-16	C95L	445.321	6.39073e-12	DQA207M	491.238	1.23383e-11
DPB84D	201.804	8.43613e-46	DQA.13A	367.143	7.71413e-38	DRB60Y	453.577	1.44512e-20	DQA129Q	507.622	1.95948e-13	DQA69T	543.863	1.7436e-09
DRB.1S	195.065	2.49352e-44	DPB170I	333.875	4.847e-32	DQA207M	437.638	2.28058e-24	DPB205M	497.847	8.52902e-15	DQB185T	550.951	3.16368e-13
DRB10E	195.065	2.49352e-44	DPB11G	332.966	7.65933e-32	DQB74E	448.136	7.22316e-27	C116Y	485.59	9.36244e-10	B116S	515.156	5.40407e-08
DRB30H	218.523	1.89962e-49	DPB194R	355.309	1.34297e-31	DQB136Q	458.654	2.81583e-24	C219R	507.336	3.0092e-12	DQA69T	549.212	9.72706e-11
DQA34E	192.96	7.18365e-44	DPB76M	299.614	5.29853e-25	DQA.7M	407.957	2.26158e-25	DQA53Q	488.972	2.24e-19	DPB170T	559.165	5.37763e-17
DQB89G	182.081	1.70245e-41	DPB57D	302.503	5.11381e-28	DRB10Q	376.093	9.61529e-18	DQB57A	440.984	7.91369e-16	C24A	478.374	9.67395e-10
DPB69E	185.276	3.41548e-42	DQA.16L	329.598	3.02135e-33	DQB125G	405.323	3.26067e-18	DQB9L	469.01	1.45836e-15	DPB215I	508.813	2.80971e-10
DQB60N	194.426	3.43796e-44	DPB9Y	354.954	8.67609e-37	DQA160A	446.894	8.93134e-22	DQB53L	523.966	1.64856e-18	DPB96R	577.06	3.17977e-13
DRB57S	204.873	1.80493e-46	DPB178L	343.785	4.60524e-32	DQB140A	463.546	7.13393e-28	DPB69E	542.494	6.37879e-19	DQA47K	597.002	1.54749e-13
DQA560	200.694	1.47328e-45	DPB96K	372.909	2.42993e-39	DQA138I	477.812	1.28224e-24	DPB65I	544.277	3.5625e-16	DQA41K	596.934	3.97211e-13
DQA53Q	202.904	4.85332e-46	DQA41K	355.855	3.9267e-35	DPB96K	469.889	1.28127e-26	DPB33E	567.04	6.42303e-23	DRB149Q	597.247	3.88195e-08
DPB11G	180.43	3.90408e-41	DRB74E	325.899	1.69582e-33	DQA207M	420.196	2.71645e-22	DQB.10S	481.38	5.19854e-15	DPB178M	527.703	1.00274e-11
DQA41K	192.689	8.22892e-44	DPB1940	371.902	7.20148e-41	DQB26L	459.696	7.26369e-21	B307M	513.922	1.78661e-13	DRB71A	564.841	9.62424e-13
DPB96R	153.11	3.62404e-35	DQB57A	287.82	3.82046e-31	DQA.7V	388.307	1.19219e-23	DQA129Q	481.972	3.73733e-22	DPB69K	536.889	1.25721e-13
DQA.7V	196.31	1.33377e-44	DQA47K	350.551	2.05163e-35	DPB170T	481.911	2.06526e-30	DPB205M	515.144	8.17531e-09	DPB76M	548.484	7.73655e-09
DPB11G	259.218	2.54024e-58	DQB136E	415.376	7.82214e-36	DQB182S	507.415	8.49847e-22	DRB51R	549.469	8.87887e-11	C116L	582.816	7.70683e-09
DPB76M	201.093	1.20597e-45	DQA207M	389.555	6.88825e-43	DQA160A	520.453	2.60595e-30	DQB185T	557.321	1.26435e-09	DPB960	588.188	2.7623e-08
DRB58D	195.065	2.49352e-44	DPB55D	364.942	7.87276e-39	DQB55P	467.854	3.50271e-24	DRB67L	521.899	1.9594e-13	DPB178M	554.004	1.46106e-08
DPB96K	292.888	1.16768e-65	DQA.6M	450.839	3.17166e-36	DQA53G	577.314	2.42086e-29	DQA175E	605.896	8.98181e-08	DPB9H	628.59	1.8988e-06
DQA41K	192.689	8.22892e-44	DRB32H	338.453	1.4624e-33	DPB194R	464.944	2.40007e-29	DPB35L	526.169	5.09242e-15	DPB57E	581.878	8.40118e-14
DQB70T	194.426	3.43796e-44	DQB136Q	312.013	2.13496e-27	DPB69E	401.421	3.21348e-21	DQA.6T	462.909	4.45251e-15	B24A	513.272	1.27802e-12
DPB170I	206.237	9.09873e-47	DQA69L	374.795	1.5274e-38	DQB.18V	475.799	9.17915e-24	DQA107T	535.218	1.27493e-14	DPB35F	567.076	1.65828e-08
DQB9Y	179.679	5.69422e-41	DPB9Y	322.052	8.05921e-33	B114N	399.003	1.75329e-18	DQA207V	461.239	3.04578e-15	DRB58A	511.673	1.23268e-12
DPB205V	283.377	1.37928e-63	DQA130S	454.406	4.41023e-39	DQB70R	581.408	1.85637e-29	DRB.25K	621.017	3.10227e-10	B95L	649.358	1.0168e-07
DPB9Y	206.999	6.20399e-47	DRB58S	377.465	5.85123e-39	DQA160S	477.175	1.76489e-23	DRB233T	536.791	1.15296e-14	B97R	573.338	1.49009e-09
DQA69T	207.208	5.58613e-47	DQB57D	325.458	1.52799e-27	DPB55A	420.25	2.11529e-22	C94I	474.602	1.67613e-13	DPB76I	512.267	8.40051e-10
DPB57E	256.96	7.89276e-58	DRB10T	415.449	2.4202e-36	DQA138I	508.817	4.34165e-22	DQA.7V	579.307	4.62453e-17	C116F	623.002	3.83734e-11
DPB69K	214.434	1.48124e-48	DQA160S	384.203	8.3071e-39	DQB70R	495.315	5.59329e-26	DQA47K	536.29	1.54183e-10	C152A	579.995	3.81757e-11
DRB57S	196.832	1.02605e-44	DQA130S	354.282	4.0827e-36	DPB11G	465.479	5.35545e-26	DPB76I	551.557	1.73009e-20	DQB70G	591.024	3.33577e-10
DPB55A	257.222	6.9193e-58	DQB136E	414.622	4.18466e-36	DRB74A	524.343	1.12843e-25	DQB57D	561.318	1.1966e-09	DRB71A	583.107	3.04239e-06
DPB57E	227.309	2.30296e-51	DQA1K	384.389	4.91472e-36	DQA160D	474.203	2.61734e-21	DQA.16L	537.909	1.4444e-15	C116Y	586.919	2.54673e-12
DRB60S	199.536	2.63621e-45	DPB8L	356.779	4.5317e-36	DQA25F	440.929	4.58509e-20	DQA129Q	512.47	2.7156e-17	C304M	558.492	1.16928e-11
DQA.6T	192.689	8.22892e-44	DPB76I	327.617	3.42429e-31	DQB57D	440.885	1.88456e-26	DQA1K	487.319	9.47644e-12	DPB36A	529.827	7.04104e-11
DRB11G	195.065	2.49352e-44	DPB65I	327.07	1.4927e-30	DPB170T	416.301	3.51191e-21	DRB73G	492.314	2.81869e-18	DQB13A	550.91	1.93597e-14
DPB35F	214.26	1.61638e-48	DQA47K	371.72	4.05974e-36	DQA25F	470.519	2.79566e-23	DQB140T	543.093	1.60826e-17	DPB55E	589.533	9.44873e-12
DRB30H	204.424	2.26222e-46	DRB71R	323.862	8.39764e-28	DPB9H	380.247	5.95847e-14	DQA34E	427.55	6.08004e-12	DPB205V	479.423	5.92285e-13
DQB125G	196.169	1.43205e-44	DPB205V	328.249	1.43696e-30	DQA1K	439.498	5.21917e-26	DQA69T	508.708	8.85241e-17	C152A	547.094	5.80446e-10
DQB136E	194.426	3.43796e-44	DPB69K	362.869	1.61863e-38	DQB125G	460.062	6.28931e-23	DPB960	532.257	1.9499e-17	C116S	580.834	3.17464e-12
DQB70G	213.629	2.21937e-48	DPB9H	331.083	2.28294e-27	DQB185I	427.87	7.72179e-23	DPB55E	490.07	3.1015e-15	C116S	542.502	4.45554e-13
DQA50L	194.402	3.48036e-44	DRB26Y	351.166	5.76186e-36	DPB55E	431.141	3.7921e-19	DPB57A	503.912	1.45585e-17	DPB33E	564.478	7.11502e-15
DQA207M	192.689	8.22892e-44	DPB205V	353.421	7.83086e-37	DQB26L	448.9	1.49464e-22	DPB76V	530.386	1.76531e-19	DQA175E	588.131	2.98291e-14
DQA.13T	207.208	5.58613e-47	DPB84D	350.484	5.11528e-33	DQB125G	433.917	6.59158e-20	DPB9H	483.451	1.94942e-12	DPB194Q	531.304	4.59248e-12
DRB85A	199.557	2.60858e-45	DRB58N	349.31	1.96367e-34	DPB57A	427.264	1.05465e-18	DPB55A	473.008	1.3477e-11	DQB30H	514.354	1.27524e-10
DRB71A	195.022	2.54856e-44	DPB57D	351.879	5.50011e-36	DQB140T	459.628	3.04987e-25	DPB96R	534.016	6.41867e-18	DQA1E	581.124	6.71671e-12
DQB60N	194.426	3.43796e-44	DPB57E	356.809	3.41137e-37	DQA50L	459.01	5.01714e-24	C156W	491.277	1.3438e-08	DQA.6T	526.365	3.15169e-09
DQB1970	216.407	5.49815e-49	DPB9H	390.548	9.22101e-40	DRB51R	494.082	2.55878e-24	DPB84G	572.281	9.32033e-19	DRB.25K	614.049	1.02729e-10
DPB76V	238.779	7.26027e-54	DRB57A	397.94	1.72589e-36	DQA53Q	522.56	6.16164e-29	B97S	563.56	1.52237e-10	C114N	594.633	2.48581e-08
DPB57D	201.219	1.13172e-45	DQB57S	357.578	7.06809e-36	DPB194Q	438.084	2.89854e-19	DRB67L	495.756	3.09588e-14	DQA.16L	557.726	3.48708e-15
DRB51T	195.021	2.54909e-44	DQA175E	315.616	4.68683e-28	C99Y	371.321	8.42129e-14	DPB65I	425.428	1.89835e-13	DPB57A	489.585	1.14884e-15
DRB58D	195.065	2.49352e-44	DPB170I	330.958	2.10618e-31	DQB13G	455.502	6.40392e-29	DPB35L	503.397	4.49618e-12	DQA138T	543.452	2.46935e-10
DQA.13T	192.893	7.42733e-44	DPB69K	346.607	2.67502e-35	DQA138I	441.332	2.18693e-22	DQA207M	511.07	6.77442e-17	C275E	551.566	1.96978e-10
DRB74L	200.003	2.08489e-45	DPB84D	314.707	9.13782e-27	DQB9F	407.113	7.06013e-22	DQA53Q	461.348	1.77864e-13	C.15I	504.826	4.28885e-11
DQA50L	202.932	4.78688e-46	DQA.7M	355.497	4.76895e-35	DPB9Y	415.411	9.90717e-15	DPB57A	463.965	3.21315e-12	C275E	499.298	2.7792e-09
DPB215I	184.412	5.27436e-42	DQB.18A	325.214	1.77774e-32	DRB60S	412.812	8.01976e-21	DPB35L	470.713	2.75619e-14	DRB67I	525.995	1.04409e-13
DQA25F	202.904	4.85332e-46	DPB194R	364.649	4.70529e-37	DQB136E	500.016	2.74394e-31	DQB86A	540.981	1.54953e-10	B114N	570.218	6.40679e-08
DQA160D	192.247	1.02754e-43	DPB57E	354.44	3.75491e-37	DQB26L	465.426	5.95994e-26	C77N	523.514	2.50605e-14	DPB194R	553.479	4.3999e-08
DQA207M	192.689	8.22892e-44	DQA47K	301.449	1.83234e-25	DPB35L	414.112	2.55678e-26	DRB71E	480.645	3.44129e-16	C16G	506.696	3.3252e-07
DQB9L	194.426	3.43796e-44	DPB57A	281.065	1.30218e-20	DPB35F	375.066	3.15361e-22	DQA.16M	441.804	3.10183e-16	DRB67I	494.736	3.45373e-13
DQA69T	194.916	2.68747e-44	DQB.10S	351.177	7.4239e-36	DPB170T	442.031	1.54671e-21	DQB70R	481.179	3.92781e-10	B67S	506.437	5.01679e-07
DQB126Q	200.545	1.58836e-45	DPB84D	365.29	1.03966e-37	DRB57A	488.661	1.15669e-28	DQA26S	531.008	7.64443e-11	DPB69E	570.901	2.68239e-10
DRB11P	220.393	7.4243e-50	DQA53Q	368.641	4.18775e-34	DPB205V	482.74	1.23975e-26	DPB57E	549.316	3.36555e-16	C219R	585.909	1.45593e-09
DQB71T	186.205	2.14132e-42	DQA26S	290.191	2.0378e-24	DPB9H	360.858	4.22913e-17	DQB70T	419.827	1.60181e-14	A70H	466.116	1.02056e-11
DQB70T	194.426	3.43796e-44	DQB125A	344.072	2.07195e-34	DPB9H	431.649	8.10682e-21	C275E	476.903	1.73009e-11	DPB215I	506.874	4.38652e-08
DRB11P	204.015	2.77785e-46	DPB96R	328.896	5.40433e-29	DQA160S	422.438	3.97585e-22	DPB84V	494.873	1.72655e-17	DQB.18V	556.175	4.89479e-15
DRB58D	195.065	2.49352e-44	DPB65I	359.397	1.28036e-37	DQB70G	437.814	8.34054e-19	DPB96R	489.286	7.26222e-13	DRB70D	541.457	5.0876e-13
DQA175E	170.831	4.87068e-39	DPB178M	271.926	8.76949e-24	DRB11P	326.835	1.26207e-13	DQB66D	380.156	2.83354e-13	DPB57A	423.445	4.7228e-11
DRB57V	195.228	2.29708e-44	DQA160S	304.224	1.6263e-25	DQA11C	389.501	2.59363e-20	DPB194R	473.959	3.92565e-20	DPB1780	544.132	5.43129e-17
DQB70T	194.426	3.43796e-44	DPB9Y	336.2	1.08991e-32	DQB30H	451.667	6.21622e-27	DQA207M	494.313	6.56179e-11	B131R	529.524	2.95757e-09
DQA69T	207.208	5.58613e-47	DQB45E	344.44	1.07265e-31	DPB9H	420.333	2.99471e-18	DPB35L	460.921	1.8793e-10	DQA47K	500.316	3.46206e-10
DQA.7M	207.208	5.58613e-47	DQA69T	362.064	1.50548e-35	DPB69K	474.176	3.37675e-26	DPB76M	557.955	5.53199e-20	DRB32H	591.493	6.98976e-09
DQB28S	195.174	2.36103e-44	DQA25F	350.783	1.0307e-35	DPB55E	481.587	2.732e-30	DPB96R	543.702	3.24008e-15	DQB1970	579.713	1.96247e-09
DRB9K	195.065	2.49352e-44	DQA207V	303.982	1.69206e-25	DPB57E	399.308	1.61487e-22	DPB55A	493.202	3.32913e-22	DQA47K	556.01	2.27897e-15
DRB30H	204.506	2.17078e-46	DPB55D	311.874	3.69753e-25	DRB86V	395.783	5.17959e-20	DPB205V	449.753	2.03598e-13	DPB35F	501.906	5.13321e-13
DPB8L	226.7	3.12695e-51	DQA26S	362.322	2.41374e-31	DQA175E	469.096	4.98925e-25	DQA.6T	533.588	9.68966e-16	DQA25F	560.923	1.71116e-07
DQB55R	207.675	4.41658e-47	DPB36A	359.654	6.40466e-35	DQB.27S	476.474	3.14369e-27	A334V	517.3	1.66343e-10	C16G	547.412	4.07968e-08
DPB205V	277.231	3.01266e-62	DQA47K	433.291	8.21424e-36	DRB71A	505.906	1.57596e-17	DRB77T	560.709	1.33229e-13	DQB87F	607.082	9.77715e-12
DPB1780	214.061	1.78588e-48	DQA.6T	325.876	3.92281e-26	DRB67F	430.177	1.73771e-24	DQA47K	488.85	1.8621e-14	DPB84V	540.588	6.34138e-13
DQA41K	192.689	8.22892e-44	DQA25F	302.329	1.17506e-25	DPB65I	390.706	5.41016e-21	DQA.6T	467.112	2.30908e-18	C16G	515.039	4.42417e-12
DQA47K	192.689	8.22892e-44	DPB11G	302.246	1.22529e-25	DQA.6T	400.614	3.47552e-23	DPB84V	456.811	6.55529e-14	DPB9H	509.064	4.87766e-13
DQA.6T	192.689	8.22892e-44	DPB194R	347.892	1.26457e-35	DQA47K	447.234	2.12448e-23	DQB.270	527.582	3.1391e-19	DPB205M	576.215	3.08708e-12
DRB73G	218.127	2.317e-49	DPB35Y	346.458	9.49911e-30	DQB125G	461.286	8.58292e-27	C156R	521.955	6.75436e-15	DQA53Q	559.335	9.72081e-10
DPB205V	251.43	1.26704e-56	DQB197S	374.048	1.69059e-28	DQB26G	430.051	7.23489e-14	DQB74S	512.282	1.21074e-19	DQA129Q	562.971	1.08206e-12
DQA41K	192.689	8.22892e-44	DPB11G	326.591	5.73985e-31	DQA53Q	402.285	3.31305e-18	DQA25F	469.194	2.84356e-16	C163T	514.184	1.97989e-11
DQA160A	204.066	2.70767e-46	DPB35F	352.95	3.04077e-34	DQA53G	456.756	2.23035e-24	B116Y	514.797	2.56696e-14	DQB185T	572.736	2.70427e-14
DQB1970	213.259	2.67284e-48	DPB96K	359.905	9.37564e-34	DQB70T	470.21	8.40399e-26	DQA160S	520.691	1.20323e-12	DPB35Y	572.858	5.09535e-13
DPB76M	242.946	8.95922e-55	DRB78Y	400.66	3.575e-36	DQB185T	497.796	6.47133e-23	C177E	540.966	5.01834e-11	DPB36A	582.899	9.44569e-11
DRB13G	209.524	1.74457e-47	DPB170I	376.181	3.97503e-38	DQA107T	464.379	5.92321e-21	DRB11P	508.745	2.72322e-11	DPB35Y	539.937	2.33721e-08
DQB167R	212.045	4.91619e-48	DPB76V	386.992	6.15067e-40	DRB58D	491.683	1.42734e-24	DQA53Q	552.138	7.52587e-15	C113H	579.555	1.64033e-07
DQA.7V	204.304	2.40285e-46	DQB220H	347.311	5.85591e-33	DPB35F	406.367	1.53233e-14	DPB194Q	466.241	1.01127e-14	DRB86G	511.955	1.36871e-11
DQB.27S	194.426	3.43796e-44	DQB26L	312.396	1.76014e-27	DPB178L	400.932	4.9915e-21	DPB33E	477.078	2.63546e-18	DQA41K	531.348	1.7467e-13
DQB57D	128.608	8.26347e-30	DQB185I	283.61	1.39832e-35	DPB178M	363.104	4.83897e-19	B67S	431.003	1.72052e-16	A.200	454.37	1.33838e-06
DQA129H	189.117	4.95537e-43	DRB32H	317.549	9.02672e-30	DPB1780	415.566	4.14988e-23	DPB76V	458.633	5.28819e-11	DPB36A	498.519	2.69294e-10
DQA1E	194.916	2.68747e-44	DQB60N	351.177	7.4239e-36	DPB55D	443.263	8.29709e-22	DPB9H	492.639	2.11393e-12	DPB170T	568.695	2.75698e-18
DQB70T	194.426	3.43796e-44	DRB11V	306.412	3.5977e-26	DPB55A	393.577	9.98647e-21	DPB76M	468.472	4.96378e-18	DQB125A	518.753	1.33254e-12
DPB11G	271.559	5.1892e-61	DRB30Y	445.638	9.51177e-40	DQA47K	534.191	4.95059e-21	DQB13A	590.817	5.27094e-14	A76A	619.826	7.20556e-08
DQB860	194.426	3.43796e-44	DQB26L	323.736	5.80162e-30	DPB205M	404.309	2.80088e-19	DPB57A	465.523	5.12066e-15	DPB9H	526.886	4.74653e-15
DPB194R	229.544	7.49557e-52	DQB86G	375.293	1.47291e-33	DQB30Y	447.565	1.8751e-17	DQB45E	513.066	5.80726e-16	C.17T	553.952	1.61414e-10
DPB57E	202.449	6.10186e-46	DQA207M	364.343	4.36233e-37	DQB126Q	486.32	2.33573e-28	DQA.13A	535.437	2.4112e-12	C156W	569.747	4.6992e-09
DQB9L	194.426	3.43796e-44	DRB67L	322.446	1.11108e-29	DPB194R	434.191	4.06435e-26	DQA175E	487.848	2.38725e-13	DPB57E	530.678	5.9688e-11
DQB136E	194.426	3.43796e-44	DQA160D	303.109	1.90468e-25	DPB65I	402.579	1.99105e-23	DQB9F	485.514	8.4812e-20	DPB1940	545.898	7.80519e-15
DRB670	195.065	2.49352e-44	DRB71R	311.781	3.31194e-27	DPB76I	401.968	2.16687e-21	DPB9H	535.223	7.95231e-31	B45K	600.552	6.3378e-16
DQA.13T	207.208	5.58613e-47	DQB26L	362.802	1.03832e-35	DPB194R	471.184	2.21674e-25	DPB65I	522.883	6.46713e-13	DPB96K	578.907	7.16104e-14
DQB87Y	169.616	8.97683e-39	DPB57E	298.89	5.90716e-30	DQB.18A	379.811	2.34867e-19	DQB.10S	444.989	6.84511e-16	B80N	485.181	2.30127e-10
DQB9L	194.426	3.43796e-44	DQB2030	329.922	2.57217e-31	DPB9Y	430.256	1.28704e-23	DQA215F	475.079	2.157e-11	DPB76M	513.523	5.63403e-10
DPB35F	236.82	1.94183e-53	DQB136E	411.725	6.27934e-40	DQA187A	552.737	1.59938e-32	DRB57D	593.879	1.4153e-10	DQB125G	624.426	3.25888e-08
DRB51T	196.196	1.41216e-44	DPB65I	346.607	1.40975e-34	DQB116V	455.95	1.3653e-25	DPB8L	543.812	7.01783e-21	C00	593.969	1.41922e-12
DRB9K	195.065	2.49352e-44	DQB28S	317.233	2.12089e-28	DPB205M	382.665	6.01627e-16	DPB178M	442.867	8.56014e-15	C152E	493.459	1.13714e-12
DQB56L	194.426	3.43796e-44	DQA.6M	303.109	1.90468e-25	DRB58F	376.58	1.02099e-17	DPB35L	443.574	2.72286e-16	C114D	488.025	2.60841e-11
DPB57D	283.797	1.11753e-63	DQA.7V	448.59	1.01521e-37	DQA.13T	570.115	2.93274e-28	C0G	609.67	3.18808e-10	DQB167R	638.532	7.77373e-08
DPB65I	247.318	9.98021e-56	DQB.10S	399.995	4.50675e-35	DRB32H	488.039	6.40291e-21	C163E	523.713	2.33264e-09	DRB58N	556.975	8.05248e-09
DPB205V	270.165	1.04482e-60	DQA41K	424.261	2.20645e-35	DQA53Q	515.663	1.17257e-21	DQB9F	577.214	4.31367e-15	A152E	615.312	6.72966e-10
DQB1970	212.434	4.0442e-48	DPB9H	366.998	1.74349e-35	DQB.27S	478.788	3.97215e-26	DPB35F	560.38	1.67312e-19	C156R	606.245	1.26703e-11
DRB71A	204.209	2.51936e-46	DRB70Q	336.119	1.56619e-30	DPB69E	402.397	3.91588e-16	DPB170I	478.255	3.04792e-18	DQB136E	515.905	8.46386e-10
DQB136E	194.426	3.43796e-44	DPB55A	354.909	8.8721e-37	DQB9Y	466.071	5.45302e-26	DQA207M	525.332	1.38123e-14	DPB96R	577.273	5.71822e-13
DQA160D	207.208	5.58613e-47	DRB86V	321.4	1.18266e-26	DPB11G	415.535	2.9466e-22	DQB.27A	496.002	2.95664e-19	DPB36A	528.377	1.27134e-08
DQA.6T	192.689	8.22892e-44	DQB185T	308.945	4.17891e-27	DPB9H	403.327	2.60037e-22	DQA75I	454.375	9.01308e-13	DPB84V	484.302	4.48752e-08
DQB.10S	194.426	3.43796e-44	DQB125G	320.19	3.46304e-29	DPB205M	392.503	1.83632e-17	DQA69T	450.356	2.82401e-14	B103V	487.935	8.77806e-10
DQA138T	192.893	7.42733e-44	DQB.18V	332.302	3.58503e-32	DPB76M	433.56	8.0733e-24	DQA.16M	502.303	1.12208e-16	DQA25F	536.293	5.53875e-09
DQA.6T	192.689	8.22892e-44	DQB26G	329.629	1.24298e-31	DPB76I	389.157	1.20554e-14	DQA.13T	431.403	8.05025e-11	A97I	464.407	9.19444e-09
DQB57S	194.426	3.43796e-44	DPB65I	368.738	8.4605e-40	DQA.7V	462.532	3.50208e-22	DQA34E	537.747	4.22138e-18	DPB194Q	585.122	5.86212e-12
DRB149Q	195.985	1.57081e-44	DPB96R	333.453	9.52365e-32	DQA34E	453.82	5.2594e-28	DPB69K	518.943	7.03404e-16	C0G	556.98	6.94223e-10
DQB.27S	194.426	3.43796e-44	DRB11P	321.789	1.54731e-29	DPB69E	414.086	7.45943e-22	DPB1780	489.455	3.90364e-18	DQB57A	529.133	2.99611e-10
DQA69T	207.208	5.58613e-47	DQA129Q	366.454	1.653e-36	DPB215I	449.31	8.82459e-20	C35Q	493.397	3.14078e-11	DPB76M	533.205	2.80268e-10
DPB215I	203.293	3.99251e-46	DQB9L	368.109	1.00353e-37	DQA.7V	485.163	2.79376e-27	B32L	514.831	5.12553e-08	B94T	539.746	5.99438e-07
DQA.6T	192.689	8.22892e-44	DRB30Y	327.967	2.87135e-31	DPB65I	410.302	1.14824e-19	DPB84G	474.229	1.29134e-15	DQA26S	537.391	1.9036e-15
DPB57E	213.623	2.22533e-48	DQB860	374.764	6.37285e-37	DRB10Y	475.287	1.17031e-23	DQA47K	536.94	4.09626e-15	C304M	577.227	2.19317e-10
DQB70T	194.426	3.43796e-44	DPB194R	352.347	3.22076e-36	DQB87F	452.737	1.25162e-23	DPB57A	500.595	4.58249e-12	A63E	543.24	6.56227e-11
DQB86G	194.377	3.52329e-44	DRB.250	305.437	5.74144e-26	DPB96R	384.47	6.10816e-19	DQB185T	463.081	7.56378e-19	DPB69K	507.011	3.40237e-11
DQA1K	192.689	8.22892e-44	DQB70E	320.215	1.42538e-29	DPB84V	390.916	4.15729e-17	DQA207V	431.396	1.98623e-10	DPB55E	464.955	6.91428e-09
DQB71A	194.587	3.17117e-44	DPB11G	339.257	2.53498e-33	DQA26S	429.924	1.70034e-21	DQA.7M	506.606	2.00838e-18	DPB35L	561.13	1.53565e-13
DRB71E	195.14	2.40178e-44	DQB77R	313.783	1.25337e-27	DPB9Y	378.023	1.10162e-15	DQA160S	418.872	1.6445e-10	C275K	465.129	1.0372e-11
DQB70E	194.55	3.22947e-44	DPB9H	334.251	3.09538e-32	DQA.6M	431.588	5.84672e-23	DQB57A	527.585	1.15099e-22	DPB76M	552.874	4.93267e-07
DQA207M	192.689	8.22892e-44	DQA11C	355.928	2.2187e-37	DPB55E	438.621	9.58315e-20	DPB76V	505.076	3.57926e-16	DQB125G	552.136	6.88471e-12
DPB76V	208.784	2.53022e-47	DQB70T	368.455	1.33498e-36	DQA160D	469.32	9.84742e-24	DQA69T	548.44	5.84559e-19	C.170	580.797	1.28266e-08
DPB8L	204.512	2.16409e-46	DQB9L	395.653	1.79161e-43	DQA.16L	523.496	1.21502e-29	DPB1780	590.011	3.47203e-16	C152A	629.155	3.93727e-10
DQB60N	194.426	3.43796e-44	DPB65I	324.198	4.59538e-30	DQA560	428.092	2.13442e-24	DQA1K	480.795	3.88072e-13	C163T	533.007	4.98209e-13
DQA41K	192.689	8.22892e-44	DQA215F	324.73	1.46567e-30	DPB96R	426.438	6.4347e-24	DPB9Y	537.383	6.08216e-26	DQB26L	572.605	2.94182e-09
DQA207V	194.916	2.68747e-44	DQA47K	350.155	1.24143e-35	DPB76M	467.884	1.98828e-27	DPB57A	514.242	9.84932e-12	DQA187A	549.067	3.60679e-09
DRB30H	207.302	5.32839e-47	DPB178L	312.534	1.08633e-24	DQA.13T	400.492	6.68643e-21	DQA.6T	461.064	7.09127e-15	DRB58S	509.757	2.99393e-12
DRB11L	206.912	6.48089e-47	DQA69L	364.307	4.19491e-36	DPB8L	500.585	1.73538e-31	DQA129H	534.603	5.45995e-09	C94I	566.572	1.5662e-08
DPB57D	256.457	1.01564e-57	DQA41K	415.205	2.12493e-36	DQA69L	543.129	1.16585e-29	DRB32H	590.832	4.96015e-12	B45M	619.733	7.61698e-08
DQA.6M	207.208	5.58613e-47	DPB170I	360.539	3.24217e-35	DQB136Q	466.576	7.23612e-25	DQA160A	528.423	3.71215e-15	DPB76I	583.666	1.06515e-13
DQB56L	194.426	3.43796e-44	DPB57E	350.346	8.81416e-36	DQA175E	451.789	7.35351e-24	DQB26G	508.745	4.45678e-14	DPB194Q	574.771	4.44953e-16
DQB185I	186.42	1.92228e-42	DPB205M	309.623	1.25876e-28	DQA.6T	408.234	3.07332e-23	DRB73A	474.027	5.0087e-16	DPB170T	511.226	1.06672e-09
DQB57S	194.426	3.43796e-44	DPB96K	347.007	4.72953e-35	DQB87Y	448.234	8.20372e-24	DQB9Y	485.525	1.01718e-09	DPB76I	519.076	6.94229e-09
DQA207M	192.689	8.22892e-44	DQA53G	336.138	4.68959e-33	DPB76M	436.833	1.07309e-23	DPB84G	483.907	6.83555e-12	DRB58N	516.697	1.02631e-08
DQB.27S	194.426	3.43796e-44	DQB1970	318.207	9.40838e-29	DPB96R	393.158	4.8239e-18	C21H	455.586	2.76407e-15	DQA.7M	505.721	1.4356e-12
DQA69T	194.916	2.68747e-44	DQA.6M	350.945	8.34157e-36	DPB65I	474.797	9.07975e-29	DPB8L	560.013	2.67474e-20	DQB135D	599.191	3.86816e-10
DPB69E	246.473	1.52574e-55	DRB9K	406.037	1.40887e-36	DQB57A	511.145	1.15615e-24	C285V	550.847	2.95921e-10	C99F	581.295	3.42825e-08
DQB136E	194.426	3.43796e-44	DQA215F	318.755	7.13798e-29	DPB215I	415.807	6.75208e-23	DQA130S	455.675	2.71668e-10	DQB9F	487.107	2.06611e-08
DQB136E	194.426	3.43796e-44	DQB89G	327.12	1.05461e-30	DPB33E	402.641	3.61542e-18	DPB11G	447.896	1.72979e-11	DRB58A	490.796	5.76118e-11
DRB.16A	223.521	1.54322e-50	DQA50L	371.839	4.04184e-34	DPB11G	503.317	1.94647e-30	C116Y	536.975	6.57049e-09	DQA160A	565.589	8.83497e-08
DQA52R	206.926	6.43445e-47	DQB56L	356.806	1.8413e-34	DPB11G	449.28	6.8235e-22	DPB84G	507.807	2.00499e-14	DPB1940	548.055	2.23678e-10
DPB8L	206.348	8.60274e-47	DQB56L	387.805	2.32929e-41	DQA560	481.14	4.41706e-22	DQA25F	540.233	1.50341e-14	DPB215I	604.44	1.12029e-15
DQB60N	194.426	3.43796e-44	DRB70Q	307.366	2.22384e-26	DPB55A	412.297	1.26485e-24	DQA160S	469.317	4.31362e-14	DPB69E	499.885	3.22329e-08
DQB9F	196.169	1.43205e-44	DQA69T	353.721	3.87699e-36	DPB178L	432.712	6.23935e-19	DPB76M	521.578	4.22528e-21	DQB57A	556.957	2.71412e-09
DQB60N	194.426	3.43796e-44	DQB185T	327.704	7.86099e-31	DPB9H	431.24	2.55709e-24	DPB76I	489.481	2.31899e-14	DQA1K	535.582	1.12272e-11
DPB76M	207.567	4.66301e-47	DRB10E	368.875	5.86012e-37	DQA41K	465.586	8.02329e-23	DRB58Y	540.899	4.01574e-18	DPB205M	604.763	1.33367e-15
DQB136E	194.426	3.43796e-44	DPB9H	338.637	3.1943e-33	DQA.7M	449.338	6.882e-26	DQB125G	523.702	6.49416e-18	DPB35L	570.903	6.40673e-12
DQB86G	194.55	3.22947e-44	DPB8L	337.778	5.24145e-33	DRB11V	453.964	4.32804e-27	C156L	502.534	3.18743e-12	DQB.27A	546.689	3.03297e-11
DRB58A	196.643	1.1281e-44	DQA69T	346.894	1.52801e-34	DPB69E	409.865	2.098e-15	DQA53Q	442.061	1.3938e-08	DPB9Y	472.575	3.31527e-08
DRB57V	185.428	3.16419e-42	DPB35Y	332.681	6.91083e-34	DQA138T	435.97	2.89676e-24	DPB178M	505.486	7.58048e-17	DRB71K	565.436	9.72848e-15
DPB9Y	243.417	7.07475e-55	DQB1970	424.74	2.49159e-41	DQB.27S	539.674	8.13707e-27	DQA207V	582.045	7.54842e-11	C95L	615.087	9.01977e-09
DPB205V	200.115	1.97158e-45	DRB96E	371.972	2.907e-39	DRB58Y	478.109	6.88191e-25	DQA53G	537.601	1.22792e-14	DPB170I	575.342	8.08009e-10
DQA47K	192.689	8.22892e-44	DPB96R	331.543	4.74007e-32	DQA34E	436.227	1.43264e-24	DPB76I	539.696	2.6456e-24	DQA160S	577.584	7.4912e-10
DQA1E	194.916	2.68747e-44	DRB13S	282.459	8.24509e-21	DQB89G	359.445	1.72181e-18	DPB11G	433.389	8.03804e-18	DPB35L	479.305	1.23448e-11
DQA26S	196.31	1.33377e-44	DPB170T	352.931	6.19497e-36	DRB670	501.756	3.13191e-34	DPB36A	578.679	1.77745e-18	DRB.24L	609.826	2.39234e-08
DQA138T	207.208	5.58613e-47	DPB960	350.664	4.67224e-33	DQA560	476.72	2.98812e-29	DPB33E	545.475	1.1149e-16	DQB57V	584.826	3.54148e-10
DPB55D	210.352	1.15126e-47	DQB2030	350.04	3.11423e-32	DRB71K	437.469	8.73676e-21	DQA.6T	489.943	4.36001e-13	DQA138T	535.91	1.20273e-11
DPB35F	228.923	1.02361e-51	DQA160S	388.122	1.69371e-36	DRB67I	469.821	1.5845e-19	DQA25F	525.387	9.03889e-14	DPB65I	568.43	5.35475e-11
DRB57A	196.196	1.41216e-44	DQA107T	320.506	7.20664e-29	DPB1780	424.247	2.30583e-24	DPB205M	482.434	2.38385e-14	DQA.7M	538.318	7.68641e-14
DQA138T	207.208	5.58613e-47	DQA560	333.287	2.95493e-29	DPB11G	420.446	1.00094e-20	DPB84G	484.752	1.06536e-15	DQB70T	536.386	6.68758e-13
DPB55A	202.788	5.14687e-46	DQA1K	364.158	5.67978e-37	DQA53G	505.405	1.42056e-32	DQA.13A	541.962	1.48257e-09	C97W	573.161	2.32852e-08
DQB182S	185.978	2.39987e-42	DPB76M	324.734	4.98276e-32	DQA.7M	374.214	2.00372e-12	DRB67F	427.626	2.70444e-13	DRB.16V	471.185	4.11354e-11
DQB.10S	194.426	3.43796e-44	DPB84G	351.771	4.30249e-36	DRB58A	458.638	4.76119e-25	DQB55P	504.781	1.09937e-11	DPB11G	551.201	9.54365e-12
DRB74R	198.465	4.516e-45	DPB36A	344.984	9.9963e-34	DRB67I	461.759	3.21617e-27	DQB70T	513.678	5.78444e-13	B24A	544.559	2.74259e-08
DRB11L	204.12	2.63497e-46	DPB76M	288.796	3.51585e-20	DRB11P	351.196	2.80239e-15	DRB.16A	420.613	7.96868e-17	C00	468.824	3.82764e-12
DPB215I	211.455	6.61361e-48	DQA.13T	384.641	1.4906e-39	DQA47K	478.916	2.74618e-22	DPB35F	560.222	1.93341e-19	DQB125G	631.703	2.79898e-17
DRB85V	233.871	8.5327e-53	DPB84D	364.586	2.85838e-30	DQA50L	485.907	3.25103e-28	DQA187A	525.891	2.56031e-10	B131R	560.257	4.56737e-09
DRB.16A	196.906	9.88774e-45	DPB69K	338.975	9.3917e-33	DQA160S	420.045	2.17816e-19	DPB65I	483.077	2.03417e-15	DQB86A	535.943	3.57156e-13
DRB11L	197.889	6.03323e-45	DPB960	341.155	5.14126e-33	DQB125A	448.994	2.91528e-25	DRB13F	492.548	4.12393e-11	DPB65I	527.812	2.8795e-09
DQA1K	192.689	8.22892e-44	DQB57D	309.591	3.01717e-27	DPB96R	404.453	2.04103e-22	DPB33E	478.097	9.35438e-18	DQA75I	522.994	2.07735e-11
DPB69E	197.204	8.51179e-45	DQB203V	361.255	1.4743e-37	DQB77R	497.368	1.88494e-31	DRB74L	533.875	1.52097e-09	C16G	565.539	1.83308e-08
DQA.6M	192.893	7.42733e-44	DPB65I	350.391	3.98397e-36	DRB233T	432.665	1.18494e-19	B156D	496.098	1.65938e-15	DRB58Y	529.743	6.6135e-09
DRB51R	195.198	2.33206e-44	DPB8L	336.152	1.64669e-32	DQB57D	422.971	1.18941e-20	DQA.16M	469.248	1.02632e-11	DQB28S	505.788	1.49613e-09
DPB69E	268.206	2.79255e-60	DQA138I	428.21	1.12898e-36	DRB57A	501.266	1.26035e-17	C97W	570.292	9.7175e-17	DPB178L	608.64	5.91844e-10
DRB.1S	195.065	2.49352e-44	DQA75I	338.413	4.93406e-33	DPB170I	422.54	4.63961e-20	DRB58N	460.19	8.46277e-10	DPB35F	500.882	1.78233e-10
DQB136E	194.426	3.43796e-44	DRB58F	291.594	6.3688e-23	DPB205V	373.845	1.19854e-19	DPB178M	461.677	7.12401e-21	DQB.18V	523.37	4.01408e-15
DRB58D	195.065	2.49352e-44	DQB28S	319.706	6.09982e-29	DPB9Y	427.709	2.68288e-25	B77S	481.684	2.03082e-13	DQA160A	534.778	3.17901e-13
DQA50L	198.525	4.38247e-45	DPB205M	356.45	3.21311e-36	DQB30Y	430.869	6.31847e-18	DQB185T	494.626	1.40738e-15	C285V	539.325	2.29851e-11
DRB51R	194.494	3.32273e-44	DQB185T	315.752	3.35469e-28	DPB36A	408.561	5.75967e-22	C.18R	473.946	6.15967e-16	DQA34E	513.055	4.00766e-10
DQA.13A	207.429	4.99838e-47	DQB57A	347.094	3.15136e-32	DPB57D	447.006	1.59291e-23	DPB178M	547.236	1.35676e-23	B45K	596.495	2.24359e-12
DQA160D	192.893	7.42733e-44	DPB205M	322.503	4.98866e-30	DQA207M	423.816	7.85294e-24	DQA.16M	490.634	2.97759e-16	DPB69E	552.941	2.93924e-15
DQB9L	194.426	3.43796e-44	DPB84G	369.711	5.18845e-40	DQA47K	468.01	3.5966e-23	DQA.6M	534.25	3.99318e-16	DPB35F	581.369	6.67776e-12
DPB69E	209.03	2.2365e-47	DRB74R	355.592	9.78322e-34	DQA.16L	456.764	8.43297e-24	DQA69L	506.687	1.59898e-12	C275K	543.015	1.667e-09
DQA160S	192.689	8.22892e-44	DRB67L	291.829	2.35315e-23	DPB33E	367.178	3.94359e-18	DQB224Q	421.493	1.70789e-13	C00	463.95	7.22557e-11
DQB74E	204.91	1.77182e-46	DPB9Y	349.402	2.77393e-33	DRB11G	470.817	3.09943e-28	DQA138T	512.297	1.19094e-10	B95L	551.71	3.42966e-10
DPB55E	229.251	8.68489e-52	DRB10T	379.444	1.57306e-34	DQA1K	474.786	1.60201e-22	DQB.18A	548.37	9.64075e-18	C73A	601.598	2.97077e-13
DQB60N	194.426	3.43796e-44	DPB205V	328.394	5.55156e-31	DQA69L	432.536	1.88328e-24	DQA207M	486.688	1.85581e-13	DPB57D	537.328	1.10947e-12
DRB78V	204.621	2.04912e-46	DQA187A	334.908	3.54531e-30	DPB69K	433.821	2.63891e-23	DPB76I	535.256	7.38252e-24	DQB57V	573.255	7.07884e-10
DQA52R	183.536	8.19306e-42	DQA34Q	327.834	3.05707e-33	DPB69K	429.636	6.13853e-24	DPB55A	503.024	1.06506e-17	DQB86A	564.44	4.62021e-15
DRB58A	208.589	2.79108e-47	DPB69E	361.91	3.25851e-35	DQA53Q	501.849	2.74558e-32	DQA160S	530.584	8.3003e-08	DPB9Y	556.639	3.31808e-07
DRB70R	207.375	5.13617e-47	DRB71E	336.425	6.61267e-30	DPB8L	416.26	4.06966e-19	DRB58Y	465.965	1.78713e-12	DPB205V	521.008	1.17903e-13
DQB70E	195.143	2.3979e-44	DPB11G	355.402	9.92946e-37	DQA26S	488.335	9.35373e-31	DQB55P	524.612	1.71133e-09	B116D	553.299	8.50988e-08
DRB57A	198.465	4.516e-45	DPB55A	321.121	1.65847e-28	DQA1E	421.137	1.51158e-23	DRB71K	491.746	4.35553e-17	DPB1940	526.52	3.70306e-09
DQA53Q	202.904	4.85332e-46	DPB96R	317.162	1.14412e-26	DPB205M	448.63	1.95658e-30	DRB71E	536.047	8.79033e-21	DQA69T	568.462	1.24511e-08
DRB57S	214.305	1.58039e-48	DRB13S	355.864	1.21397e-32	DPB35L	480.914	4.96244e-29	C.150	515.246	4.64637e-09	DQB140A	541.994	2.31891e-07
DQB116V	162.113	3.90911e-37	DPB9Y	281.886	7.09246e-28	DQA50L	351.187	8.45166e-17	DQA175E	421.921	4.08883e-17	DQB30Y	464.515	6.73392e-11
DRB.24F	195.065	2.49352e-44	DQB.10A	318.654	1.0366e-28	DPB55D	398.391	4.27578e-19	DPB84V	472.539	7.2492e-18	C66K	515.161	6.64096e-11
DQA1E	194.916	2.68747e-44	DQB57S	351.177	7.4239e-36	DPB960	431.238	3.62942e-19	DPB194Q	479.204	4.33873e-12	DQA53G	513.86	3.9334e-09
DQB60N	194.426	3.43796e-44	DQA129Q	322.32	1.18389e-29	DPB65I	431.984	1.16097e-25	DPB57A	492.065	9.10224e-15	DQB77R	533.217	1.4085e-10
DQB70E	198.369	4.73906e-45	DPB11G	349.066	1.22096e-34	DQB13A	434.74	2.12184e-20	DPB84G	494.207	1.24348e-14	C73A	544.302	1.46518e-12
DPB76V	230.916	3.7642e-52	DQB86G	373.876	5.99488e-33	DQA25F	469.939	1.11322e-22	DRB71R	544.641	5.47228e-18	C24A	579.01	4.55937e-09
DRB.250	207.868	4.00893e-47	DPB65I	346.473	5.37326e-32	DRB71R	474.768	9.67506e-30	DPB205M	525.566	1.02395e-12	DQA160D	568.234	6.48439e-11
DRB78Y	218.232	2.19763e-49	DPB76M	355.907	8.58637e-32	DQA160S	464.888	1.63792e-25	DPB960	511.616	8.15648e-12	DQB70T	556.957	1.65571e-11
DQA69T	207.208	5.58613e-47	DPB69K	370.251	2.44819e-37	DQA47K	465.446	1.72471e-22	DQB70R	548.665	7.34388e-20	DPB170I	597.157	3.31745e-12
DRB10E	195.065	2.49352e-44	DQA.13T	352.325	4.49095e-36	DPB9Y	487.155	3.59716e-31	DQB197S	524.487	9.96144e-10	C304M	560.876	1.61614e-09
DPB215I	246.926	1.2152e-55	DRB30H	413.578	3.98415e-38	DQA47K	498.613	2.93144e-20	C306V	551.946	2.81618e-13	DRB70Q	598.564	8.62536e-12
DRB.24F	195.065	2.49352e-44	DQA130S	352.325	4.49095e-36	DPB215I	456.201	2.15356e-24	DQA187A	517.398	5.16502e-15	DPB76V	560.705	4.67811e-11
DPB69K	220.819	5.99372e-50	DQA207V	397.573	2.47919e-40	DRB.16V	499.929	4.63807e-24	C219W	539.85	2.64484e-10	DQA.7V	581.388	1.15597e-10
DPB84G	227.341	2.26574e-51	DQB197S	353.43	2.9397e-29	DRB28E	436.221	9.12058e-20	DQA129Q	494.616	2.14477e-14	DQA.16L	525.119	3.33264e-08
DQA.7V	206.778	6.9313e-47	DPB178L	316.637	1.05237e-25	DPB170T	399.844	7.38936e-20	DRB13G	459.851	9.45294e-15	DQB37Y	518.522	1.86368e-14
DQB57D	210.258	1.20649e-47	DQB203I	311.909	6.62399e-24	DPB215I	378.052	4.19347e-16	DPB170T	439.122	5.50749e-15	DQA160A	486.402	6.15478e-12
DRB31I	194.63	3.10254e-44	DPB170I	331.952	1.02556e-31	DQB70R	442.398	7.82213e-26	DPB1940	478.308	2.06705e-09	C152E	515.174	1.26542e-09
DPB205V	227.233	2.39261e-51	DQA50L	408.615	2.41878e-41	DQA130S	552.578	3.6198e-33	C90A	583.339	2.91894e-08	DRB67L	613.885	3.25962e-08
DQB70T	194.426	3.43796e-44	DPB215I	344.199	1.94301e-34	DQA160A	434.095	2.51014e-21	DPB76I	526.419	7.36145e-22	DRB71A	579.973	2.51483e-13
DRB58D	195.065	2.49352e-44	DQA53Q	352.461	4.19436e-36	DPB96R	484.4	1.54259e-30	DPB55E	524.594	2.30002e-10	C00	555.635	2.52659e-08
DPB8L	201.588	9.4023e-46	DRB10T	391.319	3.63925e-43	DQA53Q	495.302	2.04107e-24	DQB140T	568.64	1.09219e-17	DPB205M	617.014	3.52252e-12
DQA207M	192.689	8.22892e-44	DQA129H	336.089	4.80606e-33	DPB76V	446.749	7.02559e-26	DPB1780	500.996	1.76766e-13	DPB55E	556.928	7.50334e-14
DQB136E	194.426	3.43796e-44	DQB74S	329.742	2.81526e-31	DPB69E	405.472	3.25254e-18	DPB76I	474.886	7.98143e-17	DPB55A	564.022	3.68719e-21
DPB170T	247.27	1.02225e-55	DRB.1S	399.947	4.50643e-35	DQB.27A	483.736	5.50609e-20	DQA160A	551.182	2.16552e-16	DRB58F	577.962	2.28017e-07
DQA69T	194.916	2.68747e-44	DPB205M	336.936	9.62502e-33	DQA129Q	437.083	1.4151e-23	DPB76V	498.671	4.23353e-15	C9Y	550.193	7.0828e-13
DPB215I	194.381	3.51728e-44	DQA.6T	359.024	1.09431e-37	DQA175E	459.742	1.06065e-23	DQA130S	502.856	5.16515e-11	DQB57D	562.313	1.24988e-14
DRB.16V	194.874	2.74441e-44	DPB69E	342.135	6.88103e-34	DPB194R	442.028	1.60891e-23	DQA.7M	530.422	5.3622e-21	DQA1K	601.7	3.10295e-17
DRB133R	213.923	1.9143e-48	DQA560	348.469	4.15082e-31	DPB76M	455.875	3.62678e-25	DPB215I	543.834	6.68266e-21	DQA.13T	583.325	3.29475e-10
DQB70E	194.55	3.22947e-44	DRB74A	306.666	3.37055e-26	DPB8L	411.944	1.0614e-24	DPB96R	460.346	3.47332e-12	DRB31I	499.715	3.50836e-10
DQA138T	194.916	2.68747e-44	DQB86G	354.256	1.57669e-36	DPB194R	475.517	3.3518e-28	DPB76I	553.529	1.02409e-18	DQB203V	587.062	7.00522e-09
DQB.18A	195.143	2.3979e-44	DQB185T	338.917	3.98147e-33	DPB35Y	417.619	7.22102e-19	DPB57A	494.275	2.03523e-18	DQA41K	551.677	3.55206e-14
DRB11L	195.663	1.84671e-44	DQB197S	316.803	3.56002e-28	DPB55A	410.257	4.15828e-22	DRB26L	467.577	3.70282e-14	B97S	519.969	4.54624e-13
DPB205V	202.033	7.51806e-46	DRB96H	376.153	9.32293e-40	DRB28E	468.536	7.13946e-22	DQB55P	512.698	3.02406e-11	C97R	542.239	5.4751e-08
DRB10E	195.065	2.49352e-44	DPB215I	359.802	1.04444e-37	DQB30Y	484.933	4.76402e-29	B275E	527.438	7.05034e-11	DRB.24F	570.75	4.66662e-11
DRB.16A	217.714	2.85153e-49	DQB1970	348.385	2.92181e-30	DPB1940	439.185	1.58985e-21	DQA41K	483.422	2.90851e-11	DPB9H	526.02	6.72455e-11
DQB9L	194.426	3.43796e-44	DRB70Q	312.253	1.8918e-27	DPB96K	392.487	3.32666e-19	DQB57D	456.12	1.49836e-15	DPB33E	517.344	5.09566e-15
DRB670	195.065	2.49352e-44	DQB167R	314.636	7.8531e-28	DPB178L	411.365	7.95008e-23	DQA11C	463.428	5.37381e-13	B45M	495.87	1.22825e-08
DQA138T	207.208	5.58613e-47	DPB35F	290.563	6.85418e-20	DPB76V	383.479	5.45783e-22	C275E	434.163	1.08487e-12	DQB60N	485.952	6.17838e-13
DQB70E	198.369	4.73906e-45	DQA25F	353.164	1.55226e-35	DPB69K	482.172	6.75518e-30	C.170	514.366	1.39507e-08	B.23L	553.322	4.33674e-10
DPB170I	257.036	7.59461e-58	DRB.24F	429.348	2.31384e-39	DQB185T	516.019	1.28151e-20	DQA52R	587.804	2.39984e-17	DPB205M	613.687	3.62717e-07
DQB.18A	194.457	3.3852e-44	DQB2030	341.749	6.77264e-34	DPB76V	451.815	9.48011e-26	C114D	511.563	1.07829e-14	DPB178M	561.562	1.53831e-12
DRB11L	194.756	2.91271e-44	DQB28S	334.426	3.14354e-32	DPB170I	432.193	4.70566e-23	DPB205M	488.625	5.81684e-14	DPB8L	530.611	9.19421e-11
DRB13F	207.667	4.43416e-47	DQA69L	317.353	1.14822e-25	DPB36A	395.054	1.19882e-18	DQB224Q	451.673	5.29081e-14	DPB9Y	483.103	2.06746e-08
DRB26Y	192.832	7.65805e-44	DPB11G	338.426	1.59307e-33	DQB1970	455.535	2.71656e-27	DQA.7M	507.31	6.22298e-13	DPB9H	537.038	4.97356e-08
DPB69K	250.274	2.26261e-56	DRB96Y	417.667	2.74541e-38	DQA160S	508.867	1.29871e-21	DQB125G	564.616	8.23559e-14	C275E	607.889	4.75995e-11
DQA26S	206.778	6.9313e-47	DQB26L	338.114	2.09055e-30	DPB170I	445.855	3.06261e-25	DQA34E	492.65	7.8841e-12	B.230	526.321	6.52699e-09
DQA207V	207.208	5.58613e-47	DPB55A	354.968	5.35273e-34	DQA175E	477.601	1.67787e-28	DPB9H	539.207	4.19533e-15	B114D	574.23	3.25757e-09
DPB194R	281.265	3.98125e-63	DQA138T	451.696	5.95682e-39	DQB.270	508.349	5.19765e-14	DQB125G	551.43	5.2528e-11	C253Q	585.822	4.50459e-09
DQB.10A	191.413	1.56285e-43	DPB36A	287.399	1.15675e-22	DRB13G	375.515	6.17264e-21	DQB125A	436.715	5.15718e-15	DPB205M	474.377	8.41157e-10
DRB96E	204.624	2.04595e-46	DRB86G	364.136	1.44607e-36	DPB9Y	467.263	3.14426e-24	C66K	510.104	5.93572e-11	DPB215I	553.049	5.63086e-11
DPB170I	194.026	4.20354e-44	DQA.6T	353.638	1.37528e-36	DQA34E	452.694	2.45489e-23	DQA1K	510.758	2.53761e-14	DRB70D	549.736	4.28481e-10
DPB8V	211.991	5.05235e-48	DRB.25K	386.901	6.26298e-40	DQA129H	518.242	2.08516e-30	DQB71T	554.53	1.70208e-09	DPB76M	583.189	8.6347e-08
DRB10E	195.065	2.49352e-44	DQB9F	325.053	4.12286e-30	DPB9Y	414.344	3.40871e-21	DPB84D	473.5	1.45628e-14	C219R	528.337	1.30978e-13
DQA.7M	163.466	1.97892e-37	DPB69K	287.973	6.52606e-29	DQB140T	371.606	5.95455e-20	DPB96R	450.342	7.09972e-19	C219R	516.401	4.37614e-16
DPB215I	170.007	7.372e-39	DQA160D	311.129	1.51292e-32	DQA47K	410.264	2.35966e-23	DQB70T	477.118	2.92297e-16	DQA130S	503.837	2.35299e-07
DPB76M	198.306	4.89102e-45	DQB56L	359.782	5.38512e-37	DQB125A	453.013	4.65494e-22	DQA47K	500.235	6.33736e-12	C163T	549.718	2.00105e-12
DPB55A	223.149	1.86045e-50	DRB71K	392.846	8.61542e-39	DRB71A	471.413	7.7335e-19	DQA1K	523.681	4.84217e-13	C73A	555.64	1.57436e-08
DQB86A	184.334	5.48649e-42	DQA160A	277.327	5.24788e-22	DPB9Y	352.828	3.65201e-18	DPB84V	464.539	4.13391e-26	DQA11C	527.8	1.81015e-15
DRB74E	207.022	6.13218e-47	DPB9Y	344.304	1.04597e-31	DQA69T	442.241	4.32036e-23	DQB87Y	519.998	1.16513e-18	A156W	553.302	7.88369e-09
DPB57D	194.573	3.19309e-44	DQA.160	369.298	6.87385e-40	DQA1E	458.419	3.71485e-21	B97T	516.679	2.29658e-14	A970	556.015	3.56823e-10
DPB194R	208.556	2.8376e-47	DRB26Y	378.36	8.16308e-39	DQA129Q	480.777	4.49923e-24	DQA.16L	556.846	2.7396e-18	C156L	594.112	1.03052e-09
DRB96H	218.305	2.1194e-49	DPB9H	356.716	5.92432e-32	DQB55P	450.075	4.36221e-22	DPB57A	499.429	2.13653e-12	DRB74E	546.179	8.06535e-12
DPB9H	248.536	5.41644e-56	DQA.160	408.629	1.07973e-36	DQB86A	528.736	5.99237e-28	B12M	567.56	4.63842e-10	DQA160D	604.366	1.30448e-09
DQB203V	198.369	4.73906e-45	DQA130S	306.375	2.68027e-25	DPB178L	404.081	4.85257e-23	DQB55P	486.843	9.25739e-20	DPB35F	537.325	1.20258e-12
DQB45E	195.174	2.36103e-44	DPB84D	351.758	6.30963e-36	DQA.6M	478.061	2.6387e-29	DRB71E	523.752	1.38462e-11	C66K	549.133	4.70691e-07
DQA175E	202.108	7.2424e-46	DPB55D	363.372	5.99157e-37	DQB.18A	474.2	6.45138e-26	DRB30Y	518.035	3.57196e-11	C21H	573.647	8.83156e-14
DRB74R	194.842	2.78897e-44	DPB76V	350.801	8.64397e-36	DQA175E	448.269	5.47294e-23	DQB26L	520.298	2.12078e-17	DPB33E	566.409	1.11714e-11
DPB11G	247.81	7.79628e-56	DQB9L	409.587	4.62721e-37	DQB9Y	513.207	2.45109e-24	C147L	567.298	1.91456e-13	DRB74A	606.428	3.96574e-10
DQA215F	203.817	3.06796e-46	DPB96R	359.306	1.09508e-35	DQB203V	474.212	8.25266e-27	DQB26G	519.096	2.09012e-11	DPB57E	559.783	1.78708e-10
DRB38L	207.538	4.73105e-47	DPB55D	370.885	2.10177e-37	DRB9E	455.007	4.65157e-20	DQA187A	503.433	3.42993e-12	DQA69T	531.375	1.24969e-07
DRB74E	219.666	1.06984e-49	DPB35F	362.898	5.22886e-33	DQA160S	450.97	6.31251e-21	DQB70T	505.492	1.53728e-13	DRB78Y	551.478	1.19079e-11
DQA160D	192.247	1.02754e-43	DPB170I	346.181	2.39454e-35	DQA69T	445.024	2.73285e-23	DQB60Y	514.369	8.26859e-17	DQB197S	558.015	3.93384e-11
DQA.13T	207.208	5.58613e-47	DQB57D	313.42	6.62254e-25	DPB57D	398.174	3.37948e-20	DPB170T	479.729	1.70449e-19	DQA25F	525.945	1.05919e-11
DQB.27S	194.426	3.43796e-44	DQA11C	349.943	1.07932e-35	DPB36A	444.309	2.62228e-22	DPB205M	492.987	3.01778e-12	A152E	529.802	1.29874e-09
DPB11G	245.709	2.23831e-55	DQB28S	412.937	2.98342e-38	DQB125A	507.383	2.51824e-22	C156L	559.994	4.06705e-13	DRB85A	611.277	7.99559e-13
DQB203V	198.369	4.73906e-45	DPB9Y	337.407	4.32074e-32	DQA160S	435.579	3.83639e-23	DQB9Y	512.591	1.69891e-18	B114D	559.618	7.00492e-12
DPB69E	201.073	1.21787e-45	DRB60S	369.267	1.83549e-38	DQB71T	470.923	6.60513e-24	DQA129H	539.595	1.1627e-16	DRB70Q	559.946	6.44446e-06
DQA107T	194.396	3.49059e-44	DQB203I	310.743	3.98958e-27	DPB76V	409.269	3.20735e-23	C103L	458.577	2.1885e-12	DRB9W	500.797	8.15574e-11
DQB203V	195.143	2.3979e-44	DQB57D	335.624	2.08941e-32	DPB170T	418.441	9.00004e-20	DQA50L	489.363	3.71597e-17	C152E	550.339	5.77989e-15
DRB58D	195.065	2.49352e-44	DQA25F	352.461	4.19436e-36	DPB205M	441.939	3.10055e-21	DPB170I	544.897	3.42293e-24	DQA.16M	594.415	1.96591e-12
DRB96H	209.327	1.92629e-47	DQA1K	315.175	7.96241e-25	DQB224Q	411.866	8.10348e-23	DPB76M	499.738	6.98012e-21	DPB960	539.075	3.56685e-10
DQA50L	204.454	2.22827e-46	DQA.7M	362.175	3.56171e-36	DPB170T	487.606	4.09438e-29	C9Y	530.205	6.719e-11	DPB205M	567.275	1.14012e-09
DQB70T	194.426	3.43796e-44	DRB71E	332.345	7.58958e-32	DPB205V	399.79	2.16661e-16	DQA207M	460.222	7.61563e-15	DPB76V	506.227	1.18007e-11
DQB125G	196.851	1.01646e-44	DPB69E	349.763	4.00339e-35	DQB135D	460.566	6.53731e-26	DQA560	521.381	6.26962e-15	DPB194Q	568.804	5.71852e-12
DPB84G	240.732	2.72308e-54	DQB60N	402.883	3.83415e-37	DQA69T	496.332	4.16806e-22	DQB224Q	575.337	6.19665e-19	C9Y	603.508	1.11065e-07
DQA.13A	198.47	4.50529e-45	DPB194R	299.404	9.50799e-24	DPB57A	397.77	3.47827e-23	DRB71E	475.205	1.37163e-18	DPB33E	530.984	8.1119e-14
DQA.16L	193.873	4.53998e-44	DPB57E	359.656	6.16825e-38	DQA.7M	452.46	5.77337e-22	DQA47K	515.754	1.78035e-15	B152E	574.385	1.90231e-14
DRB670	195.065	2.49352e-44	DPB69K	324.218	6.2787e-30	DQA160D	418.237	3.1249e-22	DQB57V	488.444	5.34054e-17	C95L	529.111	1.80531e-10
DQA1K	192.689	8.22892e-44	DPB215I	328.27	2.46417e-31	DQB71T	435.237	4.52708e-25	DPB1780	490.392	1.11385e-13	DRB10T	534.893	2.54249e-11
DPB76M	191.41	1.56543e-43	DRB67F	307.726	4.05235e-27	DQA25F	377.917	5.38292e-17	DPB96K	440.384	2.70902e-15	DRB86G	506.846	3.5679e-16
DQA560	178.119	1.24779e-40	DPB194R	313.855	2.27926e-31	DPB178M	366.481	4.03436e-13	DRB58A	412.406	1.22889e-11	C9D	451.439	4.16606e-10
DRB9K	195.065	2.49352e-44	DPB55E	317.996	1.44375e-28	DPB84D	391.78	8.71669e-18	DRB74E	466.631	5.07486e-18	DQA207M	515.481	2.76398e-12
DRB10E	195.065	2.49352e-44	DPB65I	357.133	3.99839e-37	DQB26L	463.918	4.96083e-25	DPB1780	523.249	1.33259e-14	C97W	572.926	1.81324e-12
DQA.7V	192.556	8.79899e-44	DPB36A	273.005	2.98378e-19	DPB170T	357.395	4.06174e-20	DRB51T	411.013	2.43417e-13	DQB56L	462.721	6.44093e-13
DQA25F	207.429	4.99838e-47	DPB65I	370.136	2.89883e-37	DQA160A	512.574	7.80122e-33	DPB8L	546.148	6.85908e-09	DQB30Y	577.991	1.67167e-08
DPB11G	220.395	7.41879e-50	DRB51R	387.15	3.78265e-38	DQA.16M	495.617	2.12369e-25	C73A	535.427	2.79984e-10	DQA.13T	576.831	1.23788e-10
DQA41K	192.689	8.22892e-44	DQB30Y	302.751	9.49626e-26	DPB84G	366.441	1.45638e-15	DQA34E	422.213	8.13966e-14	DPB215I	483.007	6.33796e-15
DQA160D	192.893	7.42733e-44	DPB11G	320.341	1.48213e-29	DQB185T	442.519	2.11107e-28	DQA160S	502.473	9.70761e-15	C94I	537.116	3.96212e-09
DQB71A	195.266	2.2545e-44	DPB55D	374.218	8.20648e-41	DRB74E	463.395	3.60985e-21	DQA187A	521.22	2.86557e-14	DPB96R	574.581	2.77561e-13
DPB170I	196.041	1.52717e-44	DQB86G	358.41	3.43486e-37	DRB67I	468.571	9.03789e-26	DQA75I	545.527	1.7477e-18	C116S	590.048	2.5166e-11
DQB71A	192.169	1.0688e-43	DPB9H	340.62	3.77961e-34	DQA.7V	441.741	8.65697e-24	DQA69T	518.3	2.13693e-18	DPB35Y	579.669	4.7308e-15
DPB35F	225.765	5.00021e-51	DQB57S	380.034	2.02249e-35	DQB135D	496.659	3.46773e-27	C275E	560.16	1.60293e-15	DRB31I	588.595	9.69225e-08
DQA130S	194.916	2.68747e-44	DPB69K	368.329	1.32972e-39	DQB70E	508.647	2.26804e-32	C94I	554.099	1.56478e-11	DPB96R	592.513	5.72153e-10
DQB.27S	194.426	3.43796e-44	DPB76M	318.738	7.19849e-29	DPB170T	437.542	1.15608e-27	DQA69T	525.459	6.82733e-21	DQA.16L	596.618	3.29518e-17
DQA1K	192.689	8.22892e-44	DQB30Y	331.975	3.81435e-32	DPB11G	404.592	1.57421e-17	DPB84V	469.882	6.46383e-16	DQA47K	515.999	1.11431e-11
DQA.6T	192.689	8.22892e-44	DPB9Y	363.319	5.39184e-39	DQA34E	506.664	4.9399e-33	DPB69E	562.126	9.52708e-14	C116S	612.33	1.38602e-12
DRB74R	218.094	2.35546e-49	DQB.270	336.39	1.49391e-27	DPB65I	419.902	6.33179e-20	DQA138T	464.986	1.88741e-11	C99F	508.556	4.09141e-11
DQB60N	194.426	3.43796e-44	DQB185T	305.435	5.89114e-26	DPB96R	375.603	5.44593e-17	DRB78Y	427.644	5.43607e-13	DPB57D	480.373	3.82738e-13
DQA175E	198.391	4.68885e-45	DQA1K	324.438	3.00239e-29	DPB170T	417.933	4.07256e-22	C116F	478.681	6.48598e-15	DQA.6M	540.53	3.70808e-15
DQA47K	192.689	8.22892e-44	DPB36A	338.376	1.5199e-33	DPB205M	416.986	7.56491e-19	B67C	478.899	3.59014e-15	DQA160A	529.587	1.08316e-12
DQB57S	194.426	3.43796e-44	DPB36A	336.769	8.18115e-33	DQB55P	445.271	2.08689e-25	C9Y	482.435	1.08584e-09	DQA50L	522.231	2.81931e-10
DRB26Y	195.549	1.95507e-44	DPB55D	358.231	2.93606e-37	DQA25F	494.035	2.20177e-31	DPB8L	546.442	4.51172e-13	C73A	588.197	1.03452e-10
DPB9Y	205.109	1.60304e-46	DQB56L	379.77	7.09924e-40	DQB57D	495.764	4.76801e-27	DQA.16M	539.75	3.30687e-11	DRB71E	577.568	7.76893e-10
DPB96K	282.375	2.28113e-63	DQA.6M	451.762	1.00682e-38	DQA.13T	583.086	2.10316e-30	DQB89G	628.214	1.84597e-11	C152A	655.041	2.22515e-07
DQA69L	183.726	7.44677e-42	DQA50L	293.376	1.16897e-25	DQA129H	383.712	2.00934e-21	DPB55A	445.695	3.46493e-15	DPB178M	513.847	1.51367e-16
DPB96K	213.372	2.52518e-48	DQB60N	382.548	1.11953e-38	DRB71E	478.489	1.18385e-22	DRB58F	547.493	9.82676e-17	C.17T	594.9	5.76728e-12
DPB96K	205.044	1.65621e-46	DQA207M	372.524	2.62759e-38	DQB55R	490.904	1.4319e-27	C305A	549.806	1.65686e-14	DPB69E	588.187	5.82131e-10
DQB87Y	199.768	2.34641e-45	DPB9H	356.662	5.39922e-36	DRB57V	508.978	5.40565e-35	DPB205M	557.772	2.84224e-12	C116F	600.242	7.18023e-11
DQB140A	200.461	1.65662e-45	DPB57E	358.414	3.16837e-36	DQA.6T	469.212	6.55362e-26	DQA69T	522.511	2.86423e-13	B163E	560.392	7.51896e-10
DPB69E	292.194	1.65373e-65	DQB.18A	452.352	1.0451e-36	DQB125A	557.381	1.2038e-24	C152E	589.201	1.69143e-08	DRB85A	615.375	3.11954e-07
DPB11G	221.395	4.48831e-50	DQB860	387.984	4.11265e-38	DRB67F	494.796	4.89492e-25	DQA1K	539.481	2.31451e-11	C97R	571.391	1.615e-08
DQB53L	169.094	1.16698e-38	DQB125A	317.056	4.83627e-34	DPB215I	437.555	4.91748e-28	DPB35F	515.116	1.287e-18	DQA138T	560.387	1.71597e-11
DRB71K	198.151	5.28913e-45	DPB96K	318.871	4.39941e-28	DQA69T	427.259	2.20975e-25	DQB.18A	490.163	2.17032e-15	DPB55A	534.71	2.48355e-11
DPB65L	274.464	1.20807e-61	DQA.13T	450.479	3.59312e-40	DQA207M	539.515	3.87626e-21	C116S	602.313	2.29045e-15	DQB70R	652.323	1.53015e-12
DPB69E	208.081	3.60147e-47	DRB670	370.895	2.74807e-37	DQA53G	506.143	2.91316e-31	DPB35L	557.443	7.9264e-13	DQB87Y	601.202	3.71489e-11
DPB76M	208.514	2.89799e-47	DQB57D	387.702	7.29103e-41	DQB136E	502.641	8.11339e-27	DPB170T	555.563	3.47136e-13	C194V	593.329	7.97265e-10
DRB67I	165.44	7.33002e-38	DPB96R	276.246	6.52752e-26	DQA.16L	362.894	1.29645e-20	DQB60Y	434.901	2.14466e-17	C97W	487.843	3.43423e-13
DPB36A	232.676	1.55537e-52	DQB136E	386.266	2.84667e-35	DQA25F	457.026	4.0329e-17	DQB26L	521.142	1.17351e-15	C304M	564.302	5.04404e-11
DPB9Y	232.485	1.71174e-52	DQA26S	405.473	1.6465e-39	DQA69T	529.887	6.83706e-29	C77N	581.18	7.95555e-13	DQB860	615.943	3.72416e-09
DQB57S	194.426	3.43796e-44	DQB185T	334.91	2.08638e-32	DPB55A	449.374	1.03119e-26	DQA.6T	491.996	6.64072e-11	B45E	538.484	9.2173e-12
DPB194R	253.854	3.75159e-57	DRB670	411.846	3.10805e-36	DQA107T	512.714	9.83318e-24	DQB13A	563.566	9.95792e-13	C.15L	596.947	7.57493e-09
DPB55E	230.366	4.96095e-52	DQB860	381.59	9.3608e-35	DQA25F	475.805	2.83072e-22	DQB13A	557.269	1.78543e-19	B114D	595.775	5.45732e-10
DQA138T	194.916	2.68747e-44	DRB96Y	353.26	2.60261e-36	DPB84D	453.463	1.37546e-23	DPB9H	521.01	2.05729e-16	B74D	572.285	8.03062e-13
DQB135D	189.918	3.31247e-43	DRB58A	333.814	3.74467e-33	DPB205M	453.027	9.40475e-28	DQB70R	527.958	4.87455e-18	DPB960	580.317	4.62273e-13
DQB9L	194.426	3.43796e-44	DPB170I	352.365	3.19101e-36	DQB55P	443.59	1.28269e-21	DPB194Q	529.947	1.50177e-20	DRB10Y	569.365	3.42092e-10
DPB76V	227.564	2.02599e-51	DRB.24F	383.452	8.95643e-36	DRB233T	484.486	9.04254e-24	DQB1970	535.901	7.47666e-13	C99F	572.998	1.12391e-09
DPB65I	201.42	1.02316e-45	DQB71A	359.082	3.66881e-36	DQA26S	451.545	6.85886e-22	DQA41K	521.021	7.73614e-17	C24A	561.218	2.29621e-10
DPB178L	197.245	8.33859e-45	DQA.7M	353.05	9.33856e-36	DRB28E	465.512	2.83054e-26	DPB76I	548.587	7.90044e-20	DQA53G	603.93	1.01231e-13
DQA160S	192.689	8.22892e-44	DQB136Q	328.278	2.45464e-31	DPB65I	439.814	4.51565e-26	C156L	483.705	3.47082e-11	DPB9H	517.152	7.32505e-09
DQA53G	204.066	2.70767e-46	DQB30Y	356.81	4.35795e-35	DPB9H	453.554	7.88746e-23	DPB76I	502.233	3.01545e-12	DQA69T	548.235	1.181e-11
DRB57A	196.196	1.41216e-44	DPB9H	356.442	9.99967e-37	DQB224Q	452.099	1.36618e-22	DPB35L	537.587	2.33063e-20	DRB74L	574.425	1.28371e-09
DPB205V	256.034	1.25611e-57	DRB26Y	431.61	4.48252e-40	DRB133R	504.914	1.11134e-17	DQB.27A	559.248	1.69111e-13	C.17A	598.815	3.16968e-10
DRB.1S	195.065	2.49352e-44	DPB69K	345.383	1.47744e-34	DQB55R	487.347	9.90177e-33	DPB205M	540.032	3.91657e-13	DRB71E	588.831	2.83482e-12
DPB57D	264.919	1.45334e-59	DQA.13A	430.631	6.39459e-38	DRB57A	559.166	8.5698e-30	DQB9F	588.879	5.01059e-08	C.18R	612.337	1.27676e-06
DPB96R	224.477	9.54527e-51	DRB57V	368.654	3.25095e-33	DQB87Y	484.501	5.13383e-27	C24A	539.401	1.26795e-13	DPB205V	583.568	3.01596e-11
DPB215I	271.225	6.1376e-61	DQA160S	426.508	1.21447e-35	DQA47K	524.327	4.58382e-23	DQB30H	597.99	9.26541e-18	A246S	628.057	4.17421e-08
DQB28S	198.406	4.65342e-45	DPB9H	347.434	2.8273e-34	DQA.16L	451.595	1.86493e-24	DQB71A	526.3	5.46626e-18	DPB33E	592.927	3.2801e-16
DQA138I	192.689	8.22892e-44	DPB9H	352.707	1.12116e-36	DQB66D	473.682	3.87072e-28	B70Q	518.959	1.71072e-11	C163E	577.754	1.74974e-14
DQB71A	196.128	1.46193e-44	DPB8L	323.112	1.87196e-29	DQB57D	402.797	4.39162e-19	C304V	452.241	2.04175e-12	DRB71E	494.851	6.68019e-11
DQB57S	194.426	3.43796e-44	DPB205V	353.152	2.14786e-36	DRB32H	459.886	5.09113e-25	DRB74A	517.279	3.56811e-14	C194L	551.543	4.8126e-09
DQB60N	194.426	3.43796e-44	DQB57D	320.727	2.64197e-29	DPB55A	427.74	4.42254e-25	DPB178L	539.412	4.2157e-26	C219W	582.966	4.12524e-11
DQB185I	195.094	2.45731e-44	DQB71T	315.048	6.47655e-28	DPB9Y	404.771	2.73845e-21	DQA.13A	464.768	9.50388e-15	DPB205M	508.993	2.92589e-11
DRB73G	194.486	3.33557e-44	DPB76M	359.486	9.14608e-38	DQA215F	469.702	8.79146e-26	C113H	509.004	3.6295e-10	B178K	549.526	1.94394e-10
DQA47K	192.689	8.22892e-44	DPB36A	347.865	1.28157e-35	DPB170T	444.864	6.93658e-23	DRB.16V	506.847	3.46512e-15	DQB60N	552.229	1.621e-11
DPB65I	261.23	9.25557e-59	DQB56L	424.784	1.89276e-37	DQB38A	522.867	4.01285e-23	DQA47K	580.395	3.33201e-14	B116D	618.689	6.08668e-10
DPB96R	189.212	4.7243e-43	DQB66D	339.644	1.39462e-34	DQA53Q	431.545	9.11303e-22	C66K	490.089	1.98822e-14	DQA138I	531.963	9.73381e-11
DQA25F	207.429	4.99838e-47	DPB69E	372.974	6.95362e-38	DQA187A	505.223	1.31961e-30	DPB57A	575.565	4.98651e-17	DRB47F	620.141	2.44712e-11
DPB35L	165.712	6.39497e-38	DQA.13T	297.825	1.41312e-30	DQA138I	381.905	4.75112e-20	DPB96R	451.719	6.51904e-17	DQA1K	518.84	2.55262e-16
DQB70T	194.426	3.43796e-44	DPB35F	344.735	1.48389e-34	DRB58N	469.607	5.42785e-29	DQB57A	509.254	3.04368e-10	DRB71E	541.649	1.25797e-08
DRB670	195.065	2.49352e-44	DQA207M	303.839	1.81921e-25	DQB57V	387.117	7.12646e-20	DPB65I	457.469	4.96124e-17	A76A	497.919	2.01721e-10
DPB35F	235.853	3.15552e-53	DQA41K	404.208	1.69142e-38	DQA138T	529.96	3.48493e-29	DPB33E	582.246	4.79905e-13	B.11S	617.886	2.37279e-09
DRB149H	219.095	1.42482e-49	DQB1970	331.209	3.37421e-26	DPB69K	405.13	8.1296e-18	DQA47K	452.13	7.10019e-12	C156W	501.585	2.02917e-12
DQB60N	194.426	3.43796e-44	DPB76M	355.657	6.09188e-37	DQB116V	468.93	1.87986e-26	DPB69E	520.19	8.0915e-13	DQA107T	564.105	3.42943e-11
DQA.160	192.689	8.22892e-44	DPB205M	328.34	2.3785e-31	DQB53L	456.177	1.21887e-29	DPB36A	526.973	3.9607e-17	C304M	578.119	8.57432e-13
DPB57E	227.539	2.05156e-51	DQA1E	400.455	1.70724e-39	DQA.13A	534.008	6.84142e-31	C147L	572.544	5.3762e-10	DQB66E	605.499	9.4333e-09
DQB66D	181.913	1.8524e-41	DPB8L	349.284	2.77542e-38	DQA.16L	418.589	8.43489e-17	DQB70R	516.225	5.02822e-23	DQA11C	543.197	2.06452e-07
DQB56L	194.426	3.43796e-44	DPB65I	347.077	4.56635e-35	DQB87F	461.942	8.42269e-27	DQA69L	507.579	1.4237e-11	B11A	540.226	1.10491e-08
DQB71T	205.451	1.35017e-46	DPB36A	379.63	9.04644e-40	DQA207M	490.957	5.01846e-26	DPB1780	568.595	1.2374e-18	DQA129Q	612.957	2.72911e-11
DRB71K	209.011	2.25776e-47	DPB36A	361.102	6.05296e-35	DQA.7M	480.732	7.6223e-28	DPB170T	534.259	2.55082e-13	DPB9H	574.326	2.45311e-10
DQB57S	194.426	3.43796e-44	DPB9H	352.418	3.10717e-36	DQB.270	444.663	7.65769e-22	DPB35L	529.148	3.87102e-20	DRB86V	572.36	4.91318e-11
DQA1K	192.689	8.22892e-44	DQA138I	301.449	1.83234e-25	DQA53G	375.199	8.86331e-18	DPB57E	445.025	6.47963e-17	DPB76V	516.611	2.65417e-17
DQA207M	192.689	8.22892e-44	DPB215I	319.061	2.54948e-29	DQB140A	421.421	4.63064e-24	C97R	480.83	1.28038e-14	DPB76I	527.781	7.2783e-12
DQA26S	204.304	2.40285e-46	DPB69E	346.268	9.90301e-33	DQA107T	463.155	3.03775e-27	DPB96R	530.764	1.99393e-16	DRB32H	592.638	3.66103e-15
DRB10T	195.065	2.49352e-44	DQA138T	352.325	4.49095e-36	DPB35F	465.72	1.76821e-26	DPB178M	531.681	4.60002e-16	DQA130S	568.871	1.07124e-09
DRB11L	217.797	2.73517e-49	DPB960	351.252	7.18826e-31	DQA41K	452.166	9.60843e-24	DQB116V	508.091	7.52857e-14	DPB69E	552.68	2.42971e-11
DPB57E	224.033	1.19309e-50	DQA69T	396.3	2.36641e-39	DQB9L	529.376	8.70197e-31	DQB89G	571.006	1.10285e-10	C304M	598.307	1.74153e-07
DQB9L	194.426	3.43796e-44	DPB76M	348.544	2.18205e-35	DQB135D	452.456	2.11582e-24	DPB178M	542.749	2.05372e-21	B9Y	589.246	9.17453e-12
DRB38L	210.77	9.32806e-48	DQB45E	344.527	6.1758e-31	DPB76I	415.351	3.90514e-17	DPB11G	484.124	1.10473e-16	B.10G	532.794	3.0296e-12
DRB38V	221.553	4.14618e-50	DPB205V	340.537	1.05581e-27	DQA175E	428.029	8.46168e-21	DQA138T	475.445	5.74158e-12	DPB84V	518.701	4.8016e-11
DRB38L	208.39	3.08413e-47	DPB9Y	351.645	5.1698e-33	DQA207V	445.141	4.07087e-22	DPB84V	516.616	2.80726e-17	DQB140A	590.392	8.7501e-18
DQB86G	195.143	2.3979e-44	DQA138T	351.653	6.54764e-36	DPB76M	462.564	6.19167e-26	DQA175E	495.961	7.5121e-09	B77N	530.429	4.33307e-09
DPB11G	207.542	4.72235e-47	DRB51R	371.408	1.61813e-37	DQB87Y	491.14	7.24218e-28	DQA11C	545.664	1.53563e-13	C116F	580.179	4.22842e-09
DQB53L	212.321	4.27963e-48	DQB70T	349.372	1.17546e-31	DPB960	437.23	7.03266e-21	DPB215I	500.116	2.19082e-15	DPB76V	561.731	4.17454e-15
DQA53G	204.477	2.20238e-46	DRB11L	356.93	5.04352e-35	DPB11G	462.63	8.58239e-25	DPB170I	494.455	1.68685e-08	DPB96K	545.489	9.07686e-13
DPB8L	220.665	6.47712e-50	DRB58F	377.183	6.52407e-36	DQB185T	491.712	9.97801e-27	DPB76I	546.221	1.54716e-13	DRB85A	586.987	1.71616e-10
DQA207M	192.689	8.22892e-44	DQA40E	342.373	2.03299e-34	DPB1940	470.5	1.05265e-29	DPB57A	538.718	1.46363e-16	DQB136Q	576.497	7.92601e-10
DQA1K	192.689	8.22892e-44	DQB140T	339.359	9.26776e-34	DPB55E	458.463	9.93469e-28	DQA.16M	504.588	1.10972e-11	C95L	541.007	1.59155e-09
DQA160D	189.725	3.65038e-43	DPB55D	306.86	2.68156e-27	DPB76V	409.669	3.69168e-24	DRB26L	497.493	7.15345e-21	DQB87F	559.008	4.39369e-15
DPB194R	281.257	3.99586e-63	DQA.6T	441.16	1.18802e-36	DQA50L	564.389	1.24291e-28	DRB28D	602.41	6.99729e-10	C16G	644.283	9.74082e-11
DQB9L	194.426	3.43796e-44	DPB69E	350.243	9.28239e-36	DQB87Y	429.666	5.01401e-19	DQA34E	505.773	2.68636e-18	A107G	531.035	5.0062e-07
DPB194R	213.263	2.66744e-48	DRB51R	359.252	1.3049e-33	DQA175E	481.428	2.11254e-28	DPB76I	555.151	8.99092e-18	B77N	593.026	7.54229e-10
DQB60N	194.426	3.43796e-44	DPB84D	328.636	4.91532e-31	DQA47K	433.085	1.61288e-24	DRB60Y	514.195	2.1348e-19	C303A	571.981	2.92326e-14
DQB9L	194.426	3.43796e-44	DQA34E	331.108	1.4154e-31	DRB71R	397.489	3.71641e-16	DPB69K	469.71	1.92358e-17	DPB84V	535.815	4.27659e-16
DPB170I	255.138	1.96955e-57	DRB57A	421.275	5.16317e-38	DQA.16L	521.231	1.55817e-23	B69T	561.226	2.54632e-10	DQA41K	600.292	4.0975e-10
DQB26L	213.326	2.58389e-48	DPB35F	383.116	8.22285e-39	DQA.6T	485.865	3.80397e-24	DPB11G	549.518	1.48354e-15	DQA69T	592.627	5.17745e-11
DQA130S	192.893	7.42733e-44	DPB55A	336.162	5.13384e-33	DQB9F	433.151	6.97231e-23	DRB86G	480.129	7.1785e-12	DPB178L	520.287	2.34227e-10
DQA138T	194.916	2.68747e-44	DPB65I	357.923	2.49305e-37	DQA53G	509.647	7.27896e-35	DQA187A	554.83	1.79491e-11	B69T	607.568	3.81171e-13
DQB.10S	194.426	3.43796e-44	DQB71T	315.898	3.01258e-28	DPB170I	418.119	4.96609e-24	DPB57A	502.321	4.46638e-20	DRB74E	542.076	2.87972e-10
DQA130S	207.208	5.58613e-47	DQB70G	356.058	3.09238e-34	DPB170I	465.49	1.30503e-25	DPB69E	544.691	5.60992e-19	DRB57S	589.64	2.02217e-11
DPB205V	256.139	1.19161e-57	DQB45E	419.818	1.77778e-37	DRB.16A	492.51	1.51591e-17	C.17T	558.808	3.87606e-16	DQA69L	595.622	1.29918e-09
DPB11G	249.993	2.60574e-56	DQB53Q	375.896	3.22919e-29	DQA.13T	440.504	9.14032e-16	DQA52R	506.443	4.65078e-16	DQA1K	567.901	4.52273e-15
DQB60N	194.426	3.43796e-44	DPB57D	330.623	1.80645e-31	DQA138T	443.171	2.71051e-26	DQA52R	511.563	1.34054e-16	B.10G	552.153	1.87731e-10
DQA1E	194.916	2.68747e-44	DPB57D	332.473	9.109e-32	DPB194Q	428.105	1.3838e-22	DQB57A	492.121	1.23419e-15	DQA26S	533.774	1.08971e-10
DQB136Q	211.353	6.96138e-48	DPB57D	320.356	1.62073e-25	DPB11G	421.533	8.41151e-24	B45M	480.692	1.45374e-14	DQA26S	531.263	1.14986e-12
DRB71K	195.643	1.86545e-44	DQB9F	341.116	1.69239e-33	DPB69K	411.406	5.11956e-17	DPB57A	500.139	4.51841e-21	DPB76I	536.188	1.92387e-09
DRB57V	215.852	7.26625e-49	DPB36A	358.351	7.56419e-33	DQA129Q	477.476	9.83258e-28	DPB9H	548.417	3.68084e-17	DQA.7M	574.702	2.94515e-07
DPB178L	240.025	3.88464e-54	DQA138T	408.723	1.4241e-38	DQA69T	497.549	4.31067e-21	DQA.13A	569.542	2.15908e-17	C114N	605.648	1.86884e-09
DQA69T	192.893	7.42733e-44	DQB126Q	333.337	2.1285e-32	DPB69K	401.542	1.47359e-16	C77N	447.964	9.53324e-12	DRB13S	485.506	8.94799e-10
DRB73G	207.685	4.39552e-47	DQB140A	342.834	3.06309e-31	DPB215I	423.941	2.1383e-19	DPB36A	469.519	1.46665e-11	DQA138I	513.974	2.60303e-11
DPB194R	238.436	8.62518e-54	DQB.18A	406.245	2.22636e-38	DQB.270	487.163	2.35379e-19	DRB51R	543.665	5.61156e-14	DPB76V	583.467	2.81166e-10
DQB185I	199.095	3.29025e-45	DPB9H	314.843	5.39932e-27	DPB55E	449.357	4.21638e-31	DRB67I	539.134	2.66534e-21	C295A	579.092	2.59477e-10
DPB57E	259.243	2.50924e-58	DRB51R	414.08	1.52016e-35	DQB77R	538.887	5.60911e-29	C99Y	585.749	7.61437e-12	DRB58D	607.696	2.80374e-06
DPB76M	232.46	1.73319e-52	DRB26F	416.345	6.87329e-42	DRB86V	528.096	4.05186e-26	DQB77R	581.242	3.09605e-13	A114Q	615.283	5.39786e-09
DRB.1A	202.335	6.45988e-46	DPB96R	366.357	1.49618e-37	DQB26G	480.26	1.36864e-26	B307M	529.162	2.69098e-12	DQA.13A	584.972	7.98192e-14
DQB9L	194.426	3.43796e-44	DPB178L	315.682	3.35818e-28	DQB9F	423.233	3.37099e-25	DRB.25R	467.195	3.34905e-11	B163E	517.499	1.31654e-12
DQB86G	192.216	1.0438e-43	DQB.18V	327.418	2.98234e-31	DPB1780	418.455	1.41037e-21	DQA160D	462.416	3.34889e-11	C306V	495.72	7.88149e-09
DPB205V	217.454	3.24971e-49	DQA.7M	401.313	6.96232e-42	DQB203I	524.291	1.41007e-28	DQA40E	575.81	7.09132e-13	B109F	600.639	6.26394e-07
DPB96K	222.008	3.29938e-50	DQB9L	387.392	7.54196e-38	DRB58A	484.585	6.28643e-23	DQB140A	548.286	1.44804e-15	C152A	581.483	8.33056e-09
DQB57S	194.426	3.43796e-44	DPB76V	294.76	1.28728e-23	DRB71R	389.009	2.78318e-22	C156L	450.302	4.91666e-15	DRB26L	501.006	1.07416e-12
DPB57E	257.565	5.8248e-58	DRB71K	409.336	7.10945e-35	DQA107T	541.033	1.74283e-30	DQA1E	576.559	2.51703e-09	C77N	620.398	3.56524e-11
DRB.16V	206.993	6.2218e-47	DQB203I	323.168	4.35224e-27	DPB170I	404.122	2.31045e-19	DPB76I	473.249	9.23225e-17	C9D	512.039	4.71972e-10
DRB149H	232.586	1.62667e-52	DQB71A	358.226	3.68806e-29	DPB55E	444.661	1.4437e-20	DPB69E	488.048	4.4908e-11	C9Y	535.499	5.64132e-12
DQB.27S	194.426	3.43796e-44	DPB194R	334.435	2.64956e-32	DQA53G	444.199	1.10385e-25	DQA.6T	499.383	1.0979e-13	DPB8L	554.379	1.20764e-13
DQB136E	194.426	3.43796e-44	DQB30H	321.207	2.07418e-29	DPB170T	412.956	9.84084e-22	DPB84V	472.66	1.10277e-14	C97W	528.789	6.78686e-14
DQA75I	203.878	2.97552e-46	DPB170I	384.92	2.8699e-41	DQB13A	486.316	7.53189e-24	DPB76I	537.435	8.69462e-13	DRB57V	590.428	3.34765e-13
DPB36A	133.79	6.07347e-31	DQA160S	266.934	8.40638e-31	DRB13G	377.527	7.26542e-26	B80T	448.199	4.22031e-17	DPB69E	485.639	9.42285e-10
DPB96K	229.862	6.38865e-52	DQA69T	394.21	1.2696e-37	DRB51R	527.104	9.54036e-31	DRB71K	557.646	3.26748e-08	B95I	584.996	1.69691e-07
DPB215I	198.961	3.51964e-45	DRB.24F	366.508	2.54131e-38	DQA207M	463.071	8.64472e-23	DQB125G	557.857	2.12114e-22	DPB178L	606.13	3.70851e-12
DRB77T	197.627	6.88324e-45	DPB55A	327.251	4.95079e-30	DQA129Q	431.312	1.96164e-24	DRB.1A	470.634	3.59357e-10	DQB55R	512.276	1.0964e-10
DRB.1A	195.874	1.66057e-44	DQB135D	325.92	4.00446e-30	DPB35F	419.656	3.60433e-22	C21H	479.037	1.2992e-14	DQA50L	512.267	8.18828e-09
DPB65I	205.375	1.40281e-46	DQB.27S	363.045	3.65424e-36	DQB26L	480.932	1.83562e-27	DQA138T	524.041	5.17719e-11	B80N	566.532	7.0995e-11
DQB57S	194.426	3.43796e-44	DPB84D	342.678	4.17883e-34	DQA207V	444.616	5.72877e-24	DQA160D	517.578	1.32143e-17	DPB9Y	572.669	1.15107e-13
DQB.27S	194.426	3.43796e-44	DPB65I	353.377	1.91794e-36	DQB57A	457.985	1.48868e-24	DRB9K	486.447	9.55239e-08	B156R	517.39	2.65803e-08
DQB70T	194.426	3.43796e-44	DQA26S	349.714	1.21157e-35	DPB69E	483.04	7.67007e-31	DPB205M	545.709	2.44578e-15	DPB11G	594.032	3.61514e-12
DQB70T	194.426	3.43796e-44	DPB205M	336.127	1.13065e-32	DQA53Q	440.355	1.80329e-24	DQB55P	516.162	3.12644e-18	DPB69E	561.759	1.45305e-11
DRB71K	194.762	2.90377e-44	DPB57E	311.279	3.66191e-27	DQA138I	397.993	1.25391e-20	DQA34E	462.112	1.17124e-15	C163T	522.187	9.13125e-15
DRB77T	195.897	1.64132e-44	DPB35F	345.67	1.94361e-34	DQB9Y	459.564	1.37479e-26	DQA160A	516.703	4.06055e-14	DPB9H	557.269	1.90074e-10
DRB78Y	196.165	1.43465e-44	DQB1160	322.022	3.30409e-29	DPB9H	411.654	2.86867e-21	C.150	461.204	1.93354e-12	DPB76M	500.102	4.46604e-10
DQA53Q	204.304	2.40285e-46	DPB194R	346.738	7.81428e-33	DQA34E	443.136	9.39434e-23	DPB76I	511.297	1.50705e-16	DRB47Y	550.701	3.44659e-10
DQB13A	194.513	3.29012e-44	DPB69K	345.403	1.10795e-34	DQB185T	449.106	2.3501e-24	B.230	492.677	4.08802e-11	DRB26Y	537.92	1.74104e-11
DPB9Y	169.283	1.06122e-38	DQB126Q	330.046	7.70853e-37	DQA.13T	428.744	2.94015e-23	DQA26S	477.604	2.74974e-12	C73A	516.475	4.52614e-10
DQA25F	202.904	4.85332e-46	DQA138I	355.855	3.9267e-35	DPB178L	471.991	4.43907e-27	DPB96K	519.8	4.69667e-12	C0G	554.054	4.83709e-09
DQB.27S	194.426	3.43796e-44	DRB133R	323.333	7.10773e-30	DPB69E	415.139	9.56095e-22	DPB84V	463.636	3.30794e-12	DQA50L	510.531	7.48782e-12
DPB57E	240.243	3.48178e-54	DQA160D	423.186	1.10332e-41	DQA11C	540.055	3.06658e-27	C9D	594.623	1.50177e-13	B77N	622.748	1.13767e-07
DQA160D	207.208	5.58613e-47	DQB89G	359.958	4.34264e-35	DPB178L	456.05	1.09693e-22	DPB55E	516.598	7.17852e-15	DRB.16V	552.314	2.28303e-09
DQB203V	198.369	4.73906e-45	DPB9H	323.654	4.4095e-29	DQA160D	424.961	7.87718e-24	DPB76I	490.818	4.84951e-16	DPB55A	556.309	5.83614e-16
DQA560	199.798	2.31176e-45	DQB203V	343.52	4.08608e-33	DPB69E	467.938	6.82563e-29	B74D	521.247	2.84984e-13	DRB38V	568.107	7.62494e-12
DQA160A	202.242	6.7705e-46	DRB26Y	357.573	1.18556e-35	DPB205M	470.616	2.11123e-26	DPB55A	513.441	5.98643e-11	DQA129H	554.876	1.21863e-10
DQB.10S	194.426	3.43796e-44	DPB96K	334.9	2.09725e-32	DQB71T	429.736	2.06747e-22	DPB35Y	481.234	7.16855e-13	DPB55D	541.8	7.11622e-15
DQA187A	193.023	6.95699e-44	DQB45E	354.828	4.56535e-37	DPB11G	445.504	1.69205e-21	DPB8L	492.798	6.11056e-12	DPB84G	536.554	3.71883e-11
DPB55A	252.386	7.83821e-57	DQA207V	421.161	1.37037e-38	DQB37Y	544.934	9.44488e-29	C49A	574.27	6.08634e-08	DQB30H	604.807	3.27523e-08
DPB69K	204.83	1.8445e-46	DQA129Q	364.006	1.71279e-36	DRB71E	433.014	9.80635e-17	DPB178L	489.978	4.43933e-14	DQB220H	537.908	4.41688e-12
DRB51T	194.967	2.61919e-44	DQB37Y	333.125	6.7303e-32	DPB57E	440.496	3.69234e-25	C156W	498.571	2.52313e-14	DQA207V	553.764	1.09265e-13
DRB38V	234.094	7.62972e-53	DPB205V	379.263	1.97295e-33	DQA.7M	469.983	1.65462e-21	DQB28S	521.656	6.55529e-13	C194V	561.908	2.23247e-10
DQB203V	198.369	4.73906e-45	DQB140A	348.045	2.04135e-34	DPB170I	442.604	2.37879e-22	DPB194Q	510.628	1.61475e-16	DQA47K	549.163	5.37884e-10
DPB84D	221.096	5.21572e-50	DRB74R	373.108	6.2971e-35	DQB87F	480.463	3.72148e-25	DQA53Q	532.063	6.80562e-13	B163T	575.749	3.85474e-11
DQA.6M	207.208	5.58613e-47	DQA25F	362.07	1.50023e-35	DPB55D	470.402	2.27337e-25	DPB205M	513.313	5.73127e-11	DPB170T	551.803	5.50138e-10
DRB71E	195.135	2.40787e-44	DPB76M	302.421	3.85294e-25	DQA129H	387.929	2.30782e-20	DPB57E	454.145	4.04107e-16	DRB71A	497.638	4.25401e-11
DPB8L	196.787	1.04948e-44	DRB11L	353.074	7.32765e-36	DRB71E	454.297	8.2201e-24	DQB30Y	525.01	4.13154e-17	C0G	559.387	4.53992e-09
DQB60N	194.426	3.43796e-44	DPB65I	334.493	2.57362e-32	DQA207M	425.003	1.84083e-21	DPB170T	492.724	1.8829e-16	DQB125A	561.399	1.16113e-16
DRB77T	211.207	7.49019e-48	DPB11G	353.752	7.39293e-33	DQA207V	446.815	5.06586e-22	DQB140T	538.787	8.78981e-22	DPB178L	625.067	1.56144e-20
DRB11L	194.441	3.4123e-44	DQA175E	322.371	1.16272e-29	DPB9H	428.555	6.72035e-25	DQA26S	472.706	3.03955e-11	B69A	508.649	2.03131e-09
DQA52R	199.386	2.84265e-45	DRB38V	353.87	1.81587e-35	DPB76I	446.88	5.20285e-22	DPB194R	487.129	2.23551e-10	DPB57A	552.043	7.8238e-16
DQB1970	198.46	4.52691e-45	DPB96R	350.181	7.29129e-35	DQA129Q	457.765	3.31695e-25	DPB69K	527.77	5.91319e-17	C184H	592.946	6.85202e-16
DQA25F	194.891	2.72189e-44	DPB96R	320.455	3.82985e-29	DRB86V	395.145	5.50747e-18	DQB37Y	460.422	6.50884e-16	C.15L	495.242	3.61631e-09
DPB57E	251.812	1.04552e-56	DQB185I	398.756	8.07441e-34	DRB71E	504.668	7.70581e-25	DQB30H	566.178	4.40518e-15	C95L	605.945	2.86156e-10
DQA187A	192.979	7.11453e-44	DQA1K	350.195	4.59112e-36	DPB178L	447.012	7.60396e-23	C116F	485.125	6.6764e-10	DQB182S	524.45	3.58847e-10
DPB57E	278.684	1.45312e-62	DRB31I	451.703	1.62168e-39	DQA560	541.567	2.55099e-21	DQB9F	591.097	1.95294e-12	DQA130S	620.175	6.95374e-08
DQA130S	207.208	5.58613e-47	DPB76V	371.09	1.60457e-37	DQA160A	484.869	1.45725e-26	DPB8L	525.995	1.42711e-10	DPB84G	585.763	1.06738e-14
DRB26Y	204.621	2.04912e-46	DPB57E	325.406	4.25774e-28	DPB35L	440.483	7.57028e-27	DQB71T	544.521	1.98447e-24	DQA215F	583.146	5.1369e-10
DPB57E	219.525	1.14792e-49	DQA1E	403.01	8.40637e-42	DQB70T	537.121	5.16563e-31	DQB182S	587.024	1.61547e-12	B80I	607.749	5.30312e-06
DQA.6M	207.208	5.58613e-47	DRB71E	303.828	8.3993e-23	DQB1970	383.337	4.79976e-19	DPB96R	450.563	2.42085e-16	DPB84V	523.003	1.72216e-17
DPB76M	221.103	5.19827e-50	DRB96E	397.273	3.32357e-40	DQB130R	503.234	7.5206e-25	DQA.16L	548.208	1.99703e-11	DRB58L	573.306	5.44705e-07
DQA47K	192.689	8.22892e-44	DPB57E	385.999	6.02367e-44	DQB1970	471.856	1.93476e-20	DQA175E	519.087	6.30777e-12	C24A	554.465	2.71517e-09
DPB55E	230.071	5.75154e-52	DQA215F	383.464	3.14433e-35	DQA41K	505.248	2.57329e-28	DPB76V	544.609	3.52228e-10	DQB70R	582.567	7.23056e-10
DRB.1S	195.065	2.49352e-44	DPB55D	375.129	4.69318e-41	DQA40E	478.345	3.00546e-24	DQA.13T	532.881	1.52632e-13	B103L	576.935	3.19324e-11
DRB58L	172.649	1.95222e-39	DPB96K	303.885	2.1985e-30	DQA47K	398.779	2.00889e-22	DQA34E	493.782	1.90109e-22	B114N	554.536	6.468e-15
DQA53G	198.525	4.38247e-45	DPB205M	370.412	2.8641e-39	DQB87Y	480.184	1.09948e-25	DPB170T	544.098	1.30002e-15	A97I	573.211	6.82681e-08
DQB.18V	187.622	1.05054e-42	DPB84G	330.557	6.07423e-33	DQA.6T	431.535	9.30182e-24	DPB69E	497.827	3.88797e-16	DQA207M	548.061	1.36423e-12
DQB.18A	194.377	3.52329e-44	DPB9Y	340.048	1.5325e-33	DQA25F	450.512	7.75358e-26	DQA160S	506.854	6.09005e-14	B113H	537.72	2.76402e-08
DRB57S	214.825	1.21698e-48	DPB194R	348.425	6.68374e-31	DQA53G	452.148	2.32577e-24	DPB65I	523.421	3.11114e-17	DQA207M	587.674	1.09434e-15
DRB.16A	223.174	1.83685e-50	DPB170I	318.358	1.73516e-22	DQA52R	377.211	1.6991e-14	DPB69E	438.423	5.1238e-15	DQB55P	494.761	6.10114e-14
DQA.13A	204.304	2.40285e-46	DPB1780	363.628	1.5896e-36	DQA69T	491.948	9.55288e-30	DPB33E	556.011	1.20481e-15	DQB182S	605.642	1.85542e-12
DQA53Q	194.252	3.75132e-44	DPB96R	337.35	5.59533e-33	DRB74L	427.803	1.89423e-21	DPB205M	504.478	2.01525e-18	DQB203V	562.229	2.97591e-14
DPB9Y	203.993	2.80881e-46	DQB167R	379.886	3.82119e-40	DQB57V	500.308	5.11446e-28	C194V	550.848	1.16725e-12	C163E	573.254	2.20717e-06
DRB38V	210.024	1.35704e-47	DQB13A	350.685	1.9087e-32	DPB1780	455.602	1.27368e-24	DPB35F	560.817	1.09572e-24	DQA129H	606.18	1.63679e-11
DQB86G	187.663	1.02932e-42	DQA41K	295.623	2.74199e-25	DQB136E	372.621	1.71173e-18	DPB76I	430.687	2.53446e-14	DPB9H	492.974	2.9684e-15
DPB76V	197.68	6.6992e-45	DQA41R	378.468	3.2625e-41	DQA160D	481.552	3.21223e-24	DQA69T	550.785	8.74641e-17	DPB36A	593.541	6.20365e-11
DRB73G	204.155	2.58974e-46	DPB9Y	349.654	1.67006e-33	DRB9W	446.271	8.4118e-23	DQA160A	512.364	4.30296e-16	C95I	558.017	1.41122e-11
DPB96K	196.853	1.01531e-44	DRB58L	370.749	1.0432e-39	DQA.7V	510.037	3.80895e-32	DQB70R	558.859	2.8036e-12	C295A	601.729	5.84753e-11
DRB71A	217.368	3.39168e-49	DQA53G	358.475	1.52472e-32	DPB55D	429.976	2.77208e-17	DPB76I	497.899	1.69968e-16	DQB1970	537.879	2.56627e-10
DQB56L	194.426	3.43796e-44	DPB205M	324.606	3.74174e-30	DQB140A	442.361	1.96195e-27	DPB76M	529.734	8.98849e-21	DQA130S	579.837	1.4591e-12
DRB58L	198.785	3.84475e-45	DPB55D	365.05	4.84283e-38	DRB74R	448.776	5.68392e-20	C114D	508.398	1.14913e-14	DQA.13T	555.416	7.03587e-12
DQA138I	192.689	8.22892e-44	DQA69T	301.449	1.83234e-25	DPB36A	388.923	8.53849e-21	DQB130R	443.968	1.17777e-13	DRB10Q	482.811	4.59401e-10
DRB74R	194.981	2.60087e-44	DQB.27A	333.019	7.1518e-32	DPB35L	401.682	1.16785e-16	C21H	461.933	8.34798e-15	DPB9Y	504.168	8.09713e-11
DQA53G	181.733	2.02832e-41	DPB65I	334.169	5.08804e-35	DQB2030	421.592	8.76218e-21	B116S	475.146	2.51486e-13	DRB58A	524.435	2.20937e-12
DQB.27S	194.426	3.43796e-44	DPB96R	346.584	5.85198e-35	DQA160S	439.797	4.69655e-22	DQB57A	503.881	1.19197e-15	B95I	568.048	1.14326e-15
DPB57D	271.682	4.87822e-61	DQB9L	431.389	1.31143e-36	DQB.27A	531.039	1.81828e-23	C116Y	573.536	7.08108e-11	DQA107T	616.613	5.26089e-11
DQA160S	192.689	8.22892e-44	DQA207M	301.449	1.83234e-25	DPB96R	405.316	2.16355e-24	DQA160D	472.132	2.97999e-16	DPB11G	519.69	5.34156e-12
DPB76M	226.145	4.13173e-51	DQB56L	389.196	2.438e-37	DQA1K	483.747	2.38833e-22	DQB.27A	551.776	1.61137e-16	B3250	581.068	6.22436e-08
DPB65I	194.545	3.23826e-44	DRB11P	347.662	3.61129e-35	DQA129Q	441.975	2.69428e-22	DQB57S	504.979	2.06259e-15	DRB67F	535.88	2.71529e-08
DPB1940	238.625	7.84257e-54	DQB.18V	404.244	6.70171e-38	DQB125A	523.088	1.13312e-27	C156R	572.634	1.93725e-12	DQA160D	612.757	2.38424e-10
DQB185T	212.781	3.39782e-48	DPB76I	315.335	4.19738e-24	DQA.6T	370.727	9.87125e-14	DPB11G	414.448	3.78698e-11	DQB197S	464.998	1.16164e-12
DRB38V	208.017	3.72031e-47	DPB1940	332.849	5.53944e-29	DQA138I	431.574	2.90098e-23	DQB87F	506.86	4.07087e-18	DPB35L	552.618	1.33824e-11
DPB84G	257.466	6.1225e-58	DQA160D	429.51	2.64604e-39	DQA69T	521.848	7.30923e-22	DQB135D	600.166	8.77249e-19	DPB76M	635.376	2.9593e-09
DQB136E	194.426	3.43796e-44	DQB135D	342.915	3.70826e-34	DPB55D	469.905	1.86782e-29	DPB178M	533.856	1.27537e-15	B.23R	581.374	5.44818e-12
DPB57D	162.098	3.93781e-37	DRB71K	298.044	2.05049e-31	DQB57D	402.167	1.90105e-24	DRB73A	452.14	1.55932e-12	C35Q	495.918	3.67803e-11
DPB205V	214.549	1.3977e-48	DQA.13T	380.451	5.81253e-38	DQB.18V	488.073	3.25185e-25	DRB58Y	551.973	1.30934e-15	B.10A	583.149	2.35635e-08
DPB84G	240.462	3.11919e-54	DQB.10S	397.277	5.618e-36	DQB26L	497.992	1.06182e-23	B24A	546.502	3.28653e-12	DRB60Y	576.104	5.30422e-08
DPB69K	267.643	3.70403e-60	DRB11L	426.274	2.25239e-36	DQA160A	507.223	2.31618e-19	DQA41K	568.218	5.72394e-15	C184H	611.077	5.88268e-11
DRB149Q	210.821	9.09553e-48	DPB55D	332.479	2.74152e-28	DQA130S	451.348	1.11904e-27	DPB96R	528.488	1.59292e-18	DRB58S	589.239	6.47476e-15
DRB96H	199.031	3.39799e-45	DQB125A	342.609	4.39538e-33	DPB69E	406.647	1.22006e-15	C306V	461.336	1.41238e-13	DQA207M	514.04	3.87708e-13
DPB84D	237.708	1.24287e-53	DQB.18A	398.033	9.60942e-37	DQB136Q	515.393	2.39461e-27	C156W	573.406	2.60368e-14	DQA160D	610.76	9.85094e-10
DPB9Y	284.82	6.68653e-64	DQA41K	442.279	4.06448e-36	DRB47F	518.038	3.2035e-18	DQB57A	556.952	4.43006e-10	C77N	599.573	6.64445e-11
DQB.18A	194.377	3.52329e-44	DPB69K	333.658	3.82349e-32	DQB220R	447.246	1.60393e-26	DQA130S	506.045	1.74651e-14	DRB58Y	544.864	4.64856e-10
DQA207M	192.689	8.22892e-44	DPB69K	338.221	1.64304e-33	DQA.16M	455.386	2.64145e-27	DPB65I	496.271	1.6152e-10	DPB9Y	541.702	1.58097e-11
DQA138T	194.916	2.68747e-44	DPB215I	312.273	2.39771e-27	DQB57A	371.869	1.16459e-14	DQA129Q	423.397	7.06078e-13	C.15L	470.261	7.60844e-12
DQA.6M	194.916	2.68747e-44	DPB96R	360.247	7.74551e-38	DQB9L	486.787	2.34229e-29	DPB57A	554.667	1.73724e-16	DQA50L	607.608	3.43728e-13
DPB35F	217.761	2.78539e-49	DQB70T	378.467	7.92978e-37	DQB30Y	484.092	8.91231e-25	DQA47K	537.815	2.30827e-13	C219R	582.736	2.05069e-11
DQA160S	192.689	8.22892e-44	DPB194R	341.066	3.92489e-34	DQB38A	456.912	5.13682e-27	DRB70Q	508.278	7.66462e-13	B116Y	545.782	9.12245e-10
DQA25F	204.304	2.40285e-46	DPB960	339.823	2.54132e-31	DRB74A	453.233	1.75504e-26	DPB55A	542.65	3.19803e-21	DQA75I	595.782	3.11845e-13
DQA11C	204.505	2.17125e-46	DPB170I	380.255	4.10783e-40	DQA.6T	513.908	6.50481e-31	C.17T	553.256	3.54733e-10	DRB133R	581.543	1.04547e-07
DRB73G	205.708	1.18652e-46	DQA.7M	303.131	5.59936e-23	DPB9H	394.749	1.0512e-21	DQB1970	460.067	6.3749e-16	C295A	499.229	3.89943e-10
DPB96K	219.806	9.96874e-50	DQA.6T	381.758	4.23977e-37	DQB57A	498.131	3.93613e-27	C285V	547.929	1.70482e-12	DQA.7M	587.844	2.65282e-10
DQA130S	194.916	2.68747e-44	DQB70T	351.177	7.4239e-36	DPB1780	441.602	1.92172e-21	DPB76V	518.803	1.5434e-18	B24T	553.393	4.07189e-09
DRB74E	183.022	1.061e-41	DPB9H	308.245	4.54835e-29	DQA69T	419.002	6.68679e-26	DQA187A	492.834	8.50735e-18	DPB84V	556.653	1.36369e-15
DRB.16V	204.106	2.65357e-46	DPB96K	301.179	6.68372e-23	DPB55A	414.007	2.35236e-26	DRB58A	500.272	1.57423e-20	DRB13H	562.507	3.0475e-15
DPB57E	224.555	9.17843e-51	DQB30Y	417.103	8.83617e-44	DQA53G	516.473	2.09503e-23	DPB205M	557.791	1.29385e-10	DQB87Y	595.779	7.11766e-10
DQB28S	194.477	3.35111e-44	DQB70G	328.361	5.79214e-31	DPB57E	390.343	3.46661e-15	DPB35Y	484.679	2.66273e-22	C114D	537.891	2.99334e-13
DQA187A	207.15	5.75053e-47	DPB84D	356.295	2.66588e-34	DQA.7M	452.394	1.09248e-22	DPB205M	533.548	2.08893e-19	DRB11P	592.298	1.78976e-14
DPB8L	266.663	6.05613e-60	DRB11L	444.015	1.83505e-40	DQB13A	510.47	3.5794e-16	DRB10Q	557.496	7.00617e-12	C156R	602.51	1.95647e-11
DRB51T	198.785	3.84475e-45	DPB57E	333.279	4.26065e-31	DQA53G	432.308	2.48852e-23	DRB74R	482.049	1.75407e-12	C24A	529.322	6.17596e-12
DPB69E	247.092	1.11777e-55	DQB167R	416.323	1.08939e-38	DQB86G	515.33	2.51646e-23	DQA129Q	571.146	7.95726e-14	DPB960	606.735	2.43644e-09
DQA129H	189.062	5.0945e-43	DPB76M	336.252	7.13196e-34	DRB71A	469.551	7.77834e-31	DPB35Y	512.446	5.77508e-11	DQA207M	547.35	3.46326e-09
DRB96H	204.168	2.57258e-46	DQA107T	344.283	2.51257e-32	DPB205V	454.07	1.09061e-25	DQA160A	512.283	2.35247e-14	DPB170I	558.28	1.18437e-11
DPB205V	276.84	3.66721e-62	DQA26S	449.127	2.34161e-39	DQB9Y	563.065	1.34482e-26	DQA40E	610.841	4.77691e-12	B199A	647.396	1.48448e-09
DQB185I	198.406	4.65342e-45	DQB70R	347.27	3.07098e-34	DPB36A	452.064	1.35492e-24	C194V	507.602	9.16787e-14	DQA26S	555.552	4.37111e-12
DPB65I	211.308	7.12085e-48	DRB85A	402.015	2.22844e-43	DQA1K	505.745	2.31817e-24	DQA47K	566.784	5.59549e-15	DPB194Q	605.236	5.61241e-10
DPB215I	203.884	2.96748e-46	DQA.6T	400.087	1.40711e-44	DQA69T	500.945	9.88063e-24	DQA25F	561.121	8.67577e-15	DPB8L	615.948	1.31611e-13
DQA53Q	206.924	6.44275e-47	DPB57E	390.151	9.56505e-42	DQB185T	509.624	8.25199e-28	DPB205M	547.815	6.41426e-10	C103L	581.312	7.13782e-09
DQB28S	194.477	3.35111e-44	DPB96K	350.086	1.03055e-35	DQB53L	449.982	1.60585e-23	DRB78Y	502.388	4.5152e-13	DPB9H	533.893	1.98916e-08
DPB9H	214.146	1.71169e-48	DQB.18A	391.479	1.85213e-40	DQA207V	480.079	4.83379e-21	DPB194Q	532.867	3.71566e-13	DQA.7M	582.504	1.84952e-12
DPB57D	199.364	2.87471e-45	DQA175E	328.15	7.55394e-30	DQB185T	445.02	3.0652e-27	DPB35L	500.055	1.18414e-13	DRB11S	555.19	1.125e-13
DQA215F	206.515	7.91192e-47	DPB8L	374.857	1.70269e-38	DQB70E	505.24	3.3789e-30	DPB194Q	561.724	5.66784e-14	C295A	595.342	6.70604e-09
[truncated: 8,001 more rows]
