# Supplementary material for: Amino acid residues in five separate HLA genes can explain most of the known associations between the MHC and primary biliary cholangitis
Source: PLoS Genet. 2018 Dec 3;14(12):e1007833. doi: 10.1371/journal.pgen.1007833 (PMC6292650; doi:10.1371/journal.pgen.1007833)
Supplement: S10 Spreadsheet — (XLSX) [file pgen.1007833.s038.xlsx]

## Sheet: SupFig4spreadsheet
V1	V2	V3	V4	V5	V6	SNPno	SNPname	Pval7posns	Pval5posns
6	rs7740510	0	25713491	G	A	1	rs7740510_G	0.0433105	0.0449705
6	rs742132	0	25715550	G	A	2	rs742132_G	0.277938	0.207007
6	rs13191296	0	25792585	A	G	3	rs13191296_A	0.000565414	0.000778345
6	rs9379780	0	25815150	G	A	4	rs9379780_G	0.0593242	0.0525459
6	rs16890972	0	25835427	A	G	5	rs16890972_A	0.575475	0.606058
6	rs34932751	0	25870220	G	A	6	rs34932751_G	0.0829837	0.0513963
6	rs4712969	0	25872171	A	G	7	rs4712969_A	0.000957248	0.00110538
6	rs1892250	0	25877003	A	G	8	rs1892250_A	0.000955568	0.00110192
6	rs2328893	0	25878218	A	G	9	rs2328893_A	0.158669	0.198391
6	rs6910549	0	25888790	A	G	10	rs6910549_A	0.00949129	0.00972211
6	rs1892253	0	25890293	A	C	11	rs1892253_A	0.00981113	0.0100029
6	rs1324082	0	25909950	A	G	12	rs1324082_A	0.12385	0.186185
6	rs12182983	0	25926734	A	G	13	rs12182983_A	0.0367303	0.0702061
6	rs6913879	0	25928407	G	A	14	rs6913879_G	0.119791	0.180031
6	rs6940698	0	25929559	A	G	15	rs6940698_A	0.00356018	0.00425972
6	rs17342717	0	25929749	A	G	16	rs17342717_A	0.31594	0.313972
6	rs13199775	0	25936761	T	A	17	rs13199775_T	0.00332709	0.00394613
6	rs1324088	0	25949101	A	G	18	rs1324088_A	0.042504	0.046258
6	rs1324087	0	25949387	A	G	19	rs1324087_A	0.0381203	0.0420352
6	rs4712976	0	25950182	A	G	20	rs4712976_A	0.0917364	0.0893893
6	rs1408272	0	25950930	C	A	21	rs1408272_C	0.923067	0.953531
6	rs1165148	0	25952689	A	C	22	rs1165148_A	0.172958	0.24559
6	rs1165189	0	25957758	C	A	23	rs1165189_C	0.163974	0.232373
6	rs1182814	0	25967533	G	A	24	rs1182814_G	0.180618	0.253322
6	rs1408271	0	25967600	A	T	25	rs1408271_A	0.0583457	0.0700304
6	rs1165164	0	25971460	A	G	26	rs1165164_A	0.248115	0.345383
6	rs1165162	0	25971584	A	G	27	rs1165162_A	0.180618	0.253322
6	rs1165158	0	25972877	A	C	28	rs1165158_A	0.18999	0.263778
6	rs1165205	0	25978521	T	A	29	rs1165205_T	0.88609	0.833242
6	rs501220	0	25981004	A	C	30	rs501220_A	0.0251792	0.0263889
6	rs13198474	0	25982402	A	G	31	rs13198474_A	0.00193471	0.00263313
6	rs629444	0	25993793	A	G	32	rs629444_A	0.015443	0.0190432
6	rs9467632	0	25997685	G	A	33	rs9467632_G	0.037009	0.0383264
6	rs3734523	0	26033966	A	G	34	rs3734523_A	0.000136088	0.000152104
6	rs6940007	0	26039936	C	A	35	rs6940007_C	0.0196882	0.0215264
6	rs17587226	0	26070283	A	G	36	rs17587226_A	0.00882175	0.0108746
6	rs76757832	0	26077610	A	G	37	rs76757832_A	0.861021	0.971773
6	rs13196552	0	26082183	G	A	38	rs13196552_G	0.07895	0.0668541
6	rs13212534	0	26090989	A	G	39	rs13212534_A	0.000652326	0.00086179
6	rs17587597	0	26094430	A	G	40	rs17587597_A	0.034852	0.0380545
6	rs16891235	0	26125521	G	A	41	rs16891235_G	0.103454	0.087367
6	rs3734528	0	26130223	G	A	42	rs3734528_G	0.0967371	0.0822759
6	rs10484433	0	26138471	A	C	43	rs10484433_A	0.0971601	0.0826568
6	rs11751732	0	26152043	A	G	44	rs11751732_A	0.824275	0.70585
6	rs9689245	0	26158824	A	G	45	rs9689245_A	0.998692	0.880294
6	rs13220395	0	26163347	A	G	46	rs13220395_A	0.0308027	0.0334588
6	rs16891264	0	26180424	G	A	47	rs16891264_G	0.0228284	0.0263124
6	rs2071303	0	26199315	G	A	48	rs2071303_G	0.0484222	0.0453085
6	rs1800562	0	26201120	A	G	49	rs1800562_A	0.444263	0.460865
6	rs17596719	0	26205173	A	G	50	rs17596719_A	0.687116	0.782798
6	rs198854	0	26212036	A	G	51	rs198854_A	0.107109	0.0825065
6	rs198846	0	26215442	A	G	52	rs198846_A	0.318065	0.361498
6	rs198844	0	26216261	C	G	53	rs198844_C	0.104882	0.0812374
6	rs16891315	0	26219735	G	A	54	rs16891315_G	0.0660663	0.0537418
6	rs198838	0	26221319	A	G	55	rs198838_A	0.118919	0.0916227
6	rs198837	0	26221377	T	A	56	rs198837_T	0.106602	0.0803346
6	rs13161	0	26222681	G	A	57	rs13161_G	0.103776	0.0796089
6	rs707896	0	26224403	A	G	58	rs707896_A	0.314413	0.300945
6	rs198829	0	26226872	A	G	59	rs198829_A	0.0900927	0.0654345
6	rs198828	0	26227438	G	A	60	rs198828_G	0.0723596	0.0519139
6	rs198826	0	26229132	G	A	61	rs198826_G	0.073175	0.053425
6	rs198825	0	26230481	A	G	62	rs198825_A	0.071199	0.0523605
6	rs198821	0	26231608	A	G	63	rs198821_A	0.078787	0.0580771
6	rs16891334	0	26232282	G	A	64	rs16891334_G	0.028059	0.0247993
6	rs198819	0	26232409	G	A	65	rs198819_G	0.0770801	0.0560667
6	rs198816	0	26235163	G	A	66	rs198816_G	0.071362	0.0521385
6	rs198811	0	26236425	G	A	67	rs198811_G	0.0343545	0.0260338
6	rs198809	0	26236745	G	A	68	rs198809_G	0.0725094	0.0530455
6	rs707899	0	26237927	A	G	69	rs707899_A	0.215921	0.206738
6	rs198806	0	26241595	A	G	70	rs198806_A	0.0298522	0.0219425
6	rs16891359	0	26256979	G	A	71	rs16891359_G	0.55562	0.687757
6	rs3857546	0	26265741	A	G	72	rs3857546_A	0.00232388	0.0018804
6	rs7749823	0	26266058	C	A	73	rs7749823_C	0.0019893	0.0016772
6	rs9379829	0	26280198	A	G	74	rs9379829_A	0.0124208	0.0180492
6	rs9379831	0	26283831	A	C	75	rs9379831_A	0.107164	0.119101
6	rs806977	0	26297594	G	A	76	rs806977_G	0.0186381	0.0249617
6	rs1341758	0	26308497	A	G	77	rs1341758_A	0.17982	0.162161
6	rs989710	0	26314053	A	C	78	rs989710_A	0.0621927	0.0539743
6	rs10946808	0	26341366	G	A	79	rs10946808_G	0.0153121	0.0164798
6	rs9393691	0	26380808	G	A	80	rs9393691_G	0.014126	0.0193689
6	rs9393692	0	26384629	A	G	81	rs9393692_A	0.0362773	0.0633559
6	rs6939589	0	26397182	A	G	82	rs6939589_A	0.0519569	0.0818516
6	rs9379842	0	26397289	G	A	83	rs9379842_G	0.01194	0.0169336
6	rs9379844	0	26399506	A	G	84	rs9379844_A	0.0137093	0.0191939
6	rs10484439	0	26417887	A	G	85	rs10484439_A	6.3817e-05	9.07259e-05
6	rs6923139	0	26421327	A	G	86	rs6923139_A	0.000337197	0.000361625
6	rs9467704	0	26427465	A	G	87	rs9467704_A	0.000258942	0.000296357
6	rs1053860	0	26433207	A	G	88	rs1053860_A	0.677654	0.725466
6	rs3778279	0	26433442	G	A	89	rs3778279_G	0.66373	0.710663
6	rs9358927	0	26438471	C	A	90	rs9358927_C	0.0129568	0.0168929
6	rs2893842	0	26446413	C	A	91	rs2893842_C	0.0140102	0.0194213
6	rs9366653	0	26462226	A	G	92	rs9366653_A	0.000309913	0.000265613
6	rs9379851	0	26462759	C	A	93	rs9379851_C	0.00026024	0.000226045
6	rs6933583	0	26463262	C	A	94	rs6933583_C	0.00179351	0.00251268
6	rs9393705	0	26468990	A	G	95	rs9393705_A	0.000312639	0.000265342
6	rs4712981	0	26469409	A	G	96	rs4712981_A	0.00227998	0.00318506
6	rs9393708	0	26470622	G	A	97	rs9393708_G	0.000305139	0.000259314
6	rs9379855	0	26472909	G	A	98	rs9379855_G	0.000204326	0.000163244
6	rs9393709	0	26473126	A	G	99	rs9393709_A	0.287997	0.289699
6	rs3734536	0	26473325	G	C	100	rs3734536_G	0.316032	0.318152
6	rs9379856	0	26474815	C	A	101	rs9379856_C	2.38091e-05	2.03857e-05
6	rs12199613	0	26475197	A	G	102	rs12199613_A	0.316474	0.31877
6	rs9379858	0	26475668	G	A	103	rs9379858_G	0.000254794	0.000213106
6	rs9393710	0	26475812	G	A	104	rs9393710_G	6.62954e-07	5.17117e-07
6	rs9379859	0	26477528	A	G	105	rs9379859_A	0.000254794	0.000213106
6	rs12176317	0	26480765	G	A	106	rs12176317_G	0.000202621	0.000173722
6	rs9393713	0	26481657	A	G	107	rs9393713_A	0.000240519	0.000208375
6	rs9393714	0	26481719	A	C	108	rs9393714_A	0.000236454	0.000204162
6	rs9379870	0	26482389	G	A	109	rs9379870_G	0.00196	0.00280781
6	rs2073529	0	26483138	G	A	110	rs2073529_G	0.000236601	0.000204311
6	rs1985732	0	26484140	G	A	111	rs1985732_G	0.00103499	0.00144651
6	rs13218591	0	26484811	G	A	112	rs13218591_G	0.00446876	0.00622523
6	rs1977	0	26485525	G	A	113	rs1977_G	0.000212336	0.000184668
6	rs2072806	0	26493072	G	C	114	rs2072806_G	0.00033534	0.000295932
6	rs3799378	0	26512353	G	A	115	rs3799378_G	0.0016187	0.00122181
6	rs55676749	0	26513795	G	A	116	rs55676749_G	0.38711	0.40811
6	rs3799380	0	26575161	G	A	117	rs3799380_G	0.00954925	0.0106976
6	rs9366658	0	26577845	A	G	118	rs9366658_A	0.0199738	0.0203031
6	rs9358944	0	26577854	C	A	119	rs9358944_C	0.0199738	0.0203031
6	rs9358945	0	26580093	G	A	120	rs9358945_G	0.0205895	0.0208166
6	rs7773938	0	26582023	A	G	121	rs7773938_A	0.0212512	0.0214585
6	rs6456728	0	26585758	A	G	122	rs6456728_A	0.00866114	0.00950389
6	rs9358946	0	26586906	A	G	123	rs9358946_A	0.0213414	0.0215738
6	rs16891725	0	26587129	A	G	124	rs16891725_A	9.24485e-05	7.60962e-05
6	rs7756567	0	26589621	C	A	125	rs7756567_C	0.0204645	0.0206524
6	rs2093169	0	26603078	A	G	126	rs2093169_A	0.0207536	0.0211164
6	rs13194984	0	26608542	A	C	127	rs13194984_A	0.383337	0.37891
6	rs3799383	0	26618727	A	G	128	rs3799383_A	9.25777e-05	6.80724e-05
6	rs6920256	0	26645780	A	G	129	rs6920256_A	2.58914e-05	1.78113e-05
6	rs9379892	0	26690393	G	A	130	rs9379892_G	0.0461426	0.0439674
6	rs4634439	0	26705983	G	A	131	rs4634439_G	0.000158171	0.000144232
6	rs7768682	0	26706397	A	T	132	rs7768682_A	0.141484	0.137223
6	rs9379897	0	26709505	G	A	133	rs9379897_G	0.000156188	0.000142152
6	rs2451731	0	26732801	C	A	134	rs2451731_C	0.593297	0.438029
6	rs2451741	0	26737383	G	A	135	rs2451741_G	0.584851	0.430724
6	rs71557344	0	26745703	G	A	136	rs71557344_G	2.06915e-06	2.4076e-06
6	rs2494711	0	26757400	A	G	137	rs2494711_A	0.340138	0.48879
6	rs9467847	0	26817570	G	A	138	rs9467847_G	0.147793	0.278597
6	rs9467871	0	26849124	A	G	139	rs9467871_A	0.186354	0.241192
6	rs9393777	0	27050006	G	A	140	rs9393777_G	0.0055074	0.00545108
6	rs13194491	0	27145059	A	G	141	rs13194491_A	0.268402	0.306729
6	rs6916301	0	27150237	A	G	142	rs6916301_A	0.957493	0.857175
6	rs6904071	0	27155235	A	G	143	rs6904071_A	0.00596051	0.00829409
6	rs7745603	0	27198383	A	G	144	rs7745603_A	0.00527199	0.00871398
6	rs6913660	0	27199404	A	C	145	rs6913660_A	0.00578686	0.00801524
6	rs1321578	0	27212762	C	A	146	rs1321578_C	0.958792	0.762253
6	rs7749319	0	27234439	A	G	147	rs7749319_A	0.767612	0.950396
6	rs13194053	0	27251862	G	A	148	rs13194053_G	0.00295174	0.00417315
6	rs911186	0	27258578	G	A	149	rs911186_G	0.00765466	0.0112382
6	rs13219354	0	27293643	G	A	150	rs13219354_G	8.69682e-05	0.000116592
6	rs3800307	0	27293771	T	A	151	rs3800307_T	0.00217015	0.00258946
6	rs4452638	0	27337244	A	G	152	rs4452638_A	9.24339e-05	0.000137776
6	rs11758636	0	27337540	A	G	153	rs11758636_A	0.936672	0.872723
6	rs6938200	0	27339129	G	A	154	rs6938200_G	0.00421721	0.00584549
6	rs6932590	0	27356910	G	A	155	rs6932590_G	0.00787257	0.00905161
6	rs3800316	0	27364081	C	A	156	rs3800316_C	0.00586254	0.00501474
6	rs7746199	0	27369303	A	G	157	rs7746199_A	0.00751569	0.00548939
6	rs4559087	0	27374987	A	G	158	rs4559087_A	0.565056	0.414462
6	rs7771953	0	27379322	A	G	159	rs7771953_A	0.348453	0.275752
6	rs2235233	0	27387831	G	A	160	rs2235233_G	0.434234	0.48428
6	rs2893910	0	27391233	A	T	161	rs2893910_A	0.00787866	0.00570876
6	rs6923811	0	27397755	G	A	162	rs6923811_G	0.0397224	0.0289849
6	rs9368501	0	27403061	G	A	163	rs9368501_G	0.301288	0.243976
6	rs9461357	0	27404491	A	G	164	rs9461357_A	0.671823	0.694981
6	rs17739310	0	27404754	A	G	165	rs17739310_A	0.610487	0.640069
6	rs721600	0	27406884	A	G	166	rs721600_A	0.18166	0.229076
6	rs9461362	0	27411906	A	G	167	rs9461362_A	0.807821	0.866368
6	rs7744655	0	27492048	A	G	168	rs7744655_A	0.279787	0.391323
6	rs13195040	0	27521903	G	A	169	rs13195040_G	5.61653e-05	6.43036e-05
6	rs7749305	0	27554545	G	A	170	rs7749305_G	1.73897e-05	3.09465e-05
6	rs6931577	0	27584306	A	C	171	rs6931577_A	0.540387	0.594853
6	rs6904596	0	27599278	A	G	172	rs6904596_A	0.000119249	0.000213524
6	rs9468152	0	27600885	C	A	173	rs9468152_C	0.266701	0.384421
6	rs2064092	0	27619350	A	C	174	rs2064092_A	0.931466	0.730065
6	rs6934794	0	27627324	A	G	175	rs6934794_A	0.605312	0.690005
6	rs9468159	0	27630353	A	G	176	rs9468159_A	0.684455	0.82838
6	rs10484399	0	27642507	G	A	177	rs10484399_G	0.000384234	0.000562268
6	rs10946938	0	27658775	C	A	178	rs10946938_C	0.76278	0.792208
6	rs13217599	0	27694209	G	A	179	rs13217599_G	0.121701	0.153212
6	rs16867901	0	27764055	A	G	180	rs16867901_A	0.119815	0.159509
6	rs16867911	0	27770183	A	C	181	rs16867911_A	0.131454	0.173486
6	rs9295739	0	27770374	A	G	182	rs9295739_A	0.119815	0.159509
6	rs2393997	0	27778676	A	C	183	rs2393997_A	0.728853	0.65256
6	rs9380010	0	27791551	G	A	184	rs9380010_G	0.0301702	0.0265257
6	rs9393848	0	27796348	A	G	185	rs9393848_A	0.027092	0.0241524
6	rs9468202	0	27796609	G	A	186	rs9468202_G	0.0639588	0.0899387
6	rs9468203	0	27796646	G	A	187	rs9468203_G	0.023935	0.0216455
6	rs9295740	0	27797481	A	G	188	rs9295740_A	0.00059184	0.000733543
6	rs17750424	0	27809101	G	A	189	rs17750424_G	2.08955e-05	3.54194e-05
6	rs17693963	0	27818144	C	A	190	rs17693963_C	0.000305304	0.000495551
6	rs4713119	0	27820804	G	A	191	rs4713119_G	0.66018	0.59313
6	rs6901520	0	27822554	A	C	192	rs6901520_A	0.0165184	0.0129985
6	rs9283880	0	27823222	C	A	193	rs9283880_C	0.0127226	0.00957684
6	rs9461405	0	27827354	A	C	194	rs9461405_A	0.0142808	0.010866
6	rs9461406	0	27827743	G	A	195	rs9461406_G	0.0735464	0.0595719
6	rs7776351	0	27834710	A	G	196	rs7776351_A	0.0168201	0.0128862
6	rs9295746	0	27838043	G	A	197	rs9295746_G	0.0926316	0.0745541
6	rs7759217	0	27838442	G	A	198	rs7759217_G	0.00405781	0.00427399
6	rs9468220	0	27840955	A	G	199	rs9468220_A	0.0269564	0.0284193
6	rs742046	0	27847233	G	A	200	rs742046_G	0.00394792	0.0042256
6	rs742047	0	27847359	G	A	201	rs742047_G	0.0276799	0.0293921
6	rs6915101	0	27849661	A	G	202	rs6915101_A	0.0128198	0.0131038
6	rs9468226	0	27854157	G	A	203	rs9468226_G	0.296881	0.292015
6	rs9468227	0	27854321	G	A	204	rs9468227_G	0.015227	0.015338
6	rs10484401	0	27854569	A	T	205	rs10484401_A	0.0192218	0.0202825
6	rs9295749	0	27875374	A	G	206	rs9295749_A	0.355296	0.409236
6	rs9461412	0	27879633	G	A	207	rs9461412_G	0.343818	0.342407
6	rs200483	0	27882803	A	G	208	rs200483_A	1.70587e-05	3.06704e-05
6	rs200484	0	27883653	G	A	209	rs200484_G	1.83808e-05	3.26437e-05
6	rs370155	0	27890010	C	A	210	rs370155_C	2.69025e-05	4.43504e-05
6	rs2747054	0	27891338	G	A	211	rs2747054_G	1.42227e-05	2.4986e-05
6	rs200501	0	27896921	A	G	212	rs200501_A	9.85603e-06	1.82728e-05
6	rs200490	0	27904914	A	C	213	rs200490_A	2.37738e-05	4.12813e-05
6	rs201004	0	27912913	G	A	214	rs201004_G	9.37002e-05	0.000200423
6	rs34706883	0	27913234	C	A	215	rs34706883_C	0.000565121	0.000834326
6	rs13212651	0	27914964	G	A	216	rs13212651_G	0.000490439	0.000713899
6	rs201002	0	27916171	G	A	217	rs201002_G	2.66045e-05	4.65116e-05
6	rs175597	0	27918605	G	A	218	rs175597_G	1.93777e-05	3.35266e-05
6	rs200995	0	27921673	G	A	219	rs200995_G	1.58155e-05	2.75769e-05
6	rs200994	0	27921792	A	C	220	rs200994_A	0.01655	0.0174597
6	rs200991	0	27923473	A	C	221	rs200991_A	0.00014189	0.00028789
6	rs13194781	0	27923618	G	A	222	rs13194781_G	0.000402386	0.000588664
6	rs200990	0	27923802	C	A	223	rs200990_C	2.02979e-05	3.54955e-05
6	rs200989	0	27924421	G	A	224	rs200989_G	1.54086e-05	2.69002e-05
6	rs13199772	0	27942064	G	A	225	rs13199772_G	0.000441937	0.000651912
6	rs200948	0	27943251	G	A	226	rs200948_G	2.1467e-05	3.79616e-05
6	rs200953	0	27945246	G	A	227	rs200953_G	2.35908e-05	4.17252e-05
6	rs200956	0	27947725	G	A	228	rs200956_G	0.00146112	0.00189722
6	rs13219787	0	27969649	A	G	229	rs13219787_A	0.147346	0.195976
6	rs13218875	0	27991991	A	G	230	rs13218875_A	0.000248567	0.000291434
6	rs156737	0	28003192	G	A	231	rs156737_G	0.312423	0.274657
6	rs6910968	0	28012160	A	G	232	rs6910968_A	0.407062	0.479125
6	rs276371	0	28018687	T	A	233	rs276371_T	0.310177	0.27197
6	rs149966	0	28063266	G	C	234	rs149966_G	0.0516	0.144859
6	rs149898	0	28066051	A	G	235	rs149898_A	0.211644	0.26651
6	rs156742	0	28071171	A	G	236	rs156742_A	0.071325	0.0942962
6	rs149901	0	28073482	A	G	237	rs149901_A	0.287218	0.295622
6	rs156743	0	28075068	G	A	238	rs156743_G	0.00155929	0.00225626
6	rs149970	0	28088199	A	G	239	rs149970_A	0.293328	0.301145
6	rs149971	0	28090131	A	G	240	rs149971_A	0.332261	0.297736
6	rs149974	0	28093075	G	A	241	rs149974_G	0.391999	0.349781
6	rs149976	0	28095755	G	A	242	rs149976_G	0.415883	0.37839
6	rs149990	0	28106237	A	G	243	rs149990_A	0.0013344	0.0018207
6	rs149943	0	28110367	A	G	244	rs149943_A	0.00109349	0.00143137
6	rs202906	0	28119631	G	A	245	rs202906_G	0.0037262	0.00539319
6	rs203878	0	28156975	C	A	246	rs203878_C	0.215109	0.205678
6	rs10484404	0	28163474	A	G	247	rs10484404_A	0.947713	0.995075
6	rs13197574	0	28168218	G	A	248	rs13197574_G	0.000239171	0.000279688
6	rs9468287	0	28187720	A	C	249	rs9468287_A	0.00776216	0.00904847
6	rs4713139	0	28200664	A	G	250	rs4713139_A	0.00702561	0.00918759
6	rs4713140	0	28205172	A	G	251	rs4713140_A	0.00701706	0.00919919
6	rs1225710	0	28208619	G	A	252	rs1225710_G	0.238269	0.234946
6	rs3757188	0	28215336	G	A	253	rs3757188_G	0.00713814	0.00931872
6	rs1225715	0	28221352	G	A	254	rs1225715_G	0.299813	0.29614
6	rs13205911	0	28232093	A	G	255	rs13205911_A	0.000197307	0.00023185
6	rs1225618	0	28237692	C	A	256	rs1225618_C	0.234235	0.231896
6	rs9380064	0	28251097	G	A	257	rs9380064_G	0.00647833	0.0084824
6	rs2622315	0	28260546	A	G	258	rs2622315_A	0.790857	0.738746
6	rs1233704	0	28274902	A	G	259	rs1233704_A	0.389845	0.360666
6	rs1233701	0	28276705	C	G	260	rs1233701_C	0.391441	0.357509
6	rs1233699	0	28277137	T	A	261	rs1233699_T	0.40259	0.369146
6	rs735765	0	28278276	A	G	262	rs735765_A	0.00441526	0.00494387
6	rs1237875	0	28280989	A	G	263	rs1237875_A	0.399104	0.365945
6	rs1736891	0	28295080	A	C	264	rs1736891_A	0.116504	0.118717
6	rs9393908	0	28298809	A	T	265	rs9393908_A	0.00509566	0.00611949
6	rs9366717	0	28299036	A	G	266	rs9366717_A	0.00505766	0.00607686
6	rs1150707	0	28305584	A	G	267	rs1150707_A	0.119661	0.121496
6	rs9468317	0	28306435	G	A	268	rs9468317_G	0.000841381	0.00156163
6	rs7206	0	28309117	G	A	269	rs7206_G	0.124906	0.126897
6	rs9380069	0	28311279	G	A	270	rs9380069_G	0.00872988	0.0109332
6	rs1150711	0	28316514	G	A	271	rs1150711_G	0.00335521	0.00582003
6	rs9295768	0	28317081	A	G	272	rs9295768_A	0.000754838	0.001409
6	rs967005	0	28318667	A	G	273	rs967005_A	0.000466877	0.000902681
6	rs13408	0	28320727	A	G	274	rs13408_A	0.0847406	0.0896636
6	rs1233710	0	28323425	A	G	275	rs1233710_A	0.0277929	0.0530257
6	rs2235359	0	28323620	C	A	276	rs2235359_C	0.533125	0.563731
6	rs1736895	0	28327805	A	G	277	rs1736895_A	0.0827923	0.0870546
6	rs10456362	0	28329795	A	G	278	rs10456362_A	0.00188892	0.00226922
6	rs12214383	0	28331710	A	G	279	rs12214383_A	0.0866838	0.091555
6	rs1531681	0	28334857	G	A	280	rs1531681_G	0.0707788	0.0744138
6	rs1778508	0	28337860	G	A	281	rs1778508_G	0.00167727	0.00203823
6	rs2799077	0	28342576	A	G	282	rs2799077_A	0.00168159	0.00204033
6	rs11965538	0	28347894	A	G	283	rs11965538_A	0.00161798	0.00195144
6	rs1778484	0	28348777	G	A	284	rs1778484_G	0.00184031	0.00253814
6	rs1419183	0	28350773	C	A	285	rs1419183_C	0.00158995	0.00195359
6	rs1150726	0	28351021	A	G	286	rs1150726_A	0.00186896	0.00257964
6	rs1150724	0	28358215	A	G	287	rs1150724_A	0.0021612	0.00296141
6	rs6901575	0	28358963	A	G	288	rs6901575_A	0.00230391	0.0027228
6	rs13211507	0	28365356	G	A	289	rs13211507_G	0.000126612	0.000144894
6	rs1997660	0	28377642	G	A	290	rs1997660_G	0.00332956	0.00454314
6	rs9468333	0	28379177	A	G	291	rs9468333_A	0.00357612	0.0048998
6	rs16893947	0	28392700	G	A	292	rs16893947_G	0.503192	0.577254
6	rs853690	0	28393461	A	G	293	rs853690_A	0.00413245	0.00562436
6	rs853685	0	28396764	A	G	294	rs853685_A	0.00292015	0.0030232
6	rs707907	0	28399219	G	A	295	rs707907_G	0.00404107	0.00550322
6	rs9301	0	28400685	G	A	296	rs9301_G	0.134571	0.139497
6	rs853684	0	28402529	G	A	297	rs853684_G	0.149768	0.157917
6	rs853683	0	28403018	G	A	298	rs853683_G	0.00411411	0.00560833
6	rs16893970	0	28407274	G	A	299	rs16893970_G	0.541969	0.620356
6	rs853676	0	28407666	A	G	300	rs853676_A	0.00310727	0.0032733
6	rs17312661	0	28408315	G	A	301	rs17312661_G	0.0215253	0.0239221
6	rs7772827	0	28409122	G	A	302	rs7772827_G	0.000915689	0.00143082
6	rs1416920	0	28410763	G	A	303	rs1416920_G	0.000449524	0.000792241
6	rs9468344	0	28417548	C	A	304	rs9468344_C	0.000344438	0.000614972
6	rs6912584	0	28417569	G	A	305	rs6912584_G	0.00840312	0.00748771
6	rs12180820	0	28424457	A	G	306	rs12180820_A	0.000857263	0.00140065
6	rs213237	0	28431917	G	A	307	rs213237_G	0.181069	0.184266
6	rs6921919	0	28433180	G	C	308	rs6921919_G	0.042005	0.0433481
6	rs6922111	0	28433287	A	G	309	rs6922111_A	0.0420799	0.0433687
6	rs213230	0	28438243	G	A	310	rs213230_G	0.00579561	0.00879961
6	rs213228	0	28439231	C	A	311	rs213228_C	0.00790002	0.00985176
6	rs7773051	0	28448295	A	G	312	rs7773051_A	0.0503662	0.0664208
6	rs7774981	0	28454889	G	A	313	rs7774981_G	0.0964678	0.0898113
6	rs1052215	0	28456137	A	C	314	rs1052215_A	0.202147	0.217149
6	rs2531825	0	28457243	A	G	315	rs2531825_A	0.258044	0.259023
6	rs13213152	0	28457677	G	A	316	rs13213152_G	0.00045058	0.000481859
6	rs3734563	0	28457704	G	A	317	rs3734563_G	0.0340028	0.0454551
6	rs7764722	0	28462512	A	G	318	rs7764722_A	0.0402072	0.0533595
6	rs9461458	0	28463854	A	G	319	rs9461458_A	0.0171205	0.0227994
6	rs1361385	0	28466299	G	A	320	rs1361385_G	0.0447958	0.0593022
6	rs2041230	0	28473494	G	A	321	rs2041230_G	0.0409716	0.0544759
6	rs2232423	0	28474130	G	A	322	rs2232423_G	0.000335946	0.00034233
6	rs2232422	0	28474241	A	G	323	rs2232422_A	0.539119	0.546316
6	rs4357130	0	28475662	C	A	324	rs4357130_C	0.0422286	0.056218
6	rs9468370	0	28476919	A	G	325	rs9468370_A	0.040264	0.0535527
6	rs13196606	0	28478057	A	G	326	rs13196606_A	0.098706	0.0921977
6	rs6907950	0	28478225	A	G	327	rs6907950_A	0.0397736	0.0531392
6	rs6908137	0	28478372	C	A	328	rs6908137_C	0.0400186	0.0534061
6	rs4254981	0	28479381	C	A	329	rs4254981_C	0.0277626	0.0384255
6	rs1124131	0	28488227	C	A	330	rs1124131_C	0.0238236	0.0333123
6	rs6899389	0	28489119	A	C	331	rs6899389_A	0.0237659	0.0336108
6	rs1558205	0	28490241	A	C	332	rs1558205_A	0.00841063	0.0101217
6	rs6922169	0	28490911	A	G	333	rs6922169_A	0.0262481	0.0363957
6	rs16894091	0	28498116	A	T	334	rs16894091_A	0.065778	0.0622087
6	rs16894095	0	28498209	A	G	335	rs16894095_A	0.008298	0.0164424
6	rs3800328	0	28498822	A	G	336	rs3800328_A	0.0268308	0.0369107
6	rs2859365	0	28499444	G	A	337	rs2859365_G	0.249814	0.251179
6	rs1339898	0	28503485	A	G	338	rs1339898_A	0.00841657	0.0100383
6	rs7740351	0	28507391	C	A	339	rs7740351_C	0.0288753	0.0407774
6	rs16894106	0	28508318	A	G	340	rs16894106_A	0.0642133	0.0608645
6	rs7766356	0	28508517	G	A	341	rs7766356_G	0.0307001	0.0316326
6	rs11752919	0	28511582	G	A	342	rs11752919_G	0.00289755	0.00605539
6	rs6917130	0	28514800	G	A	343	rs6917130_G	0.00265737	0.00564452
6	rs916403	0	28516237	G	A	344	rs916403_G	0.0377162	0.0448798
6	rs2531803	0	28519199	C	A	345	rs2531803_C	0.0332732	0.0434835
6	rs13190937	0	28519223	A	G	346	rs13190937_A	0.00861642	0.0111644
6	rs2531804	0	28519282	G	A	347	rs2531804_G	0.0005443	0.000939046
6	rs6902687	0	28521470	G	A	348	rs6902687_G	0.00767268	0.00986978
6	rs6939966	0	28523864	G	A	349	rs6939966_G	0.00295528	0.00619409
6	rs6903535	0	28525201	G	A	350	rs6903535_G	0.0024966	0.00516194
6	rs1041926	0	28534275	G	A	351	rs1041926_G	0.454387	0.718969
6	rs16894128	0	28552144	G	A	352	rs16894128_G	0.199901	0.270951
6	rs1029328	0	28555894	G	A	353	rs1029328_G	0.168043	0.249519
6	rs1015811	0	28556065	G	A	354	rs1015811_G	0.507759	0.65295
6	rs7770236	0	28558416	A	G	355	rs7770236_A	0.0278271	0.0344559
6	rs2859355	0	28569200	A	G	356	rs2859355_A	0.900416	0.804877
6	rs12661782	0	28574421	G	A	357	rs12661782_G	0.658829	0.932148
6	rs2071966	0	28581304	C	A	358	rs2071966_C	0.550647	0.805074
6	rs722788	0	28591129	C	A	359	rs722788_C	0.621941	0.601062
6	rs406113	0	28591461	C	A	360	rs406113_C	0.912825	0.817729
6	rs445870	0	28602306	G	A	361	rs445870_G	0.974657	0.790509
6	rs13215054	0	28610773	A	C	362	rs13215054_A	0.321794	0.320867
6	rs6456825	0	28630674	G	A	363	rs6456825_G	0.643559	0.686239
6	rs414745	0	28634634	C	A	364	rs414745_C	0.344553	0.292059
6	rs418092	0	28641925	A	G	365	rs418092_A	0.412194	0.349608
6	rs450630	0	28650403	A	G	366	rs450630_A	0.697709	0.739372
6	rs370520	0	28650499	A	G	367	rs370520_A	0.697709	0.739372
6	rs17336532	0	28651243	A	G	368	rs17336532_A	0.0814647	0.0875598
6	rs16901848	0	28654931	A	G	369	rs16901848_A	0.112861	0.0819971
6	rs6901724	0	28673806	G	A	370	rs6901724_G	0.948739	0.805767
6	rs418914	0	28676507	G	A	371	rs418914_G	0.386836	0.322649
6	rs442439	0	28680985	A	G	372	rs442439_A	0.376203	0.312839
6	rs9501180	0	28687450	A	G	373	rs9501180_A	0.603679	0.609531
6	rs16894171	0	28710251	A	G	374	rs16894171_A	0.395747	0.355596
6	rs7743296	0	28722589	T	A	375	rs7743296_T	0.176789	0.1539
6	rs13194504	0	28738670	A	G	376	rs13194504_A	0.000385797	0.000396294
6	rs7767008	0	28738772	C	A	377	rs7767008_C	0.813345	0.934373
6	rs16894191	0	28749668	G	A	378	rs16894191_G	0.139475	0.14112
6	rs3864294	0	28749936	G	A	379	rs3864294_G	0.42083	0.352874
6	rs12111360	0	28775427	A	G	380	rs12111360_A	0.754388	0.658945
6	rs6939576	0	28777294	A	G	381	rs6939576_A	0.324312	0.282875
6	rs6908726	0	28779322	G	C	382	rs6908726_G	0.00394232	0.00239956
6	rs9368570	0	28784172	A	G	383	rs9368570_A	0.00718562	0.00340186
6	rs1539584	0	28787924	C	A	384	rs1539584_C	0.2625	0.158635
6	rs9468413	0	28797651	C	A	385	rs9468413_C	0.0432557	0.0167418
6	rs9393929	0	28804042	A	C	386	rs9393929_A	0.00339465	0.00208961
6	rs7755641	0	28807348	G	A	387	rs7755641_G	0.50037	0.662884
6	rs6456834	0	28808331	A	C	388	rs6456834_A	0.0490649	0.0193581
6	rs880638	0	28814891	A	G	389	rs880638_A	0.436211	0.505635
6	rs1233579	0	28820642	G	A	390	rs1233579_G	0.000383976	0.000421201
6	rs1233585	0	28824324	G	A	391	rs1233585_G	0.00673408	0.0104299
6	rs9257136	0	28831820	C	A	392	rs9257136_C	0.000427785	0.000459477
6	rs1233599	0	28839167	C	A	393	rs1233599_C	0.000417154	0.000447364
6	rs1233604	0	28842655	A	G	394	rs1233604_A	0.000398185	0.000425019
6	rs1233615	0	28847563	A	C	395	rs1233615_A	0.64698	0.503937
6	rs1233619	0	28853431	A	G	396	rs1233619_A	0.000246656	0.000281591
6	rs1233621	0	28855622	G	A	397	rs1233621_G	0.873636	0.695711
6	rs1311918	0	28861625	A	G	398	rs1311918_A	0.000282474	0.000301138
6	rs2765222	0	28875055	A	G	399	rs2765222_A	0.799072	0.698132
6	rs7767099	0	28876677	A	G	400	rs7767099_A	0.000259802	0.00027867
6	rs2765220	0	28877650	G	A	401	rs2765220_G	0.00976977	0.013342
6	rs3131343	0	28883543	A	G	402	rs3131343_A	0.000274833	0.000296009
6	rs4324798	0	28884096	A	G	403	rs4324798_A	0.000168876	0.000183173
6	rs209181	0	28900456	A	G	404	rs209181_A	0.000344326	0.000647989
6	rs3118357	0	28910128	A	G	405	rs3118357_A	0.000285979	0.000309343
6	rs9257248	0	28911270	A	G	406	rs9257248_A	0.000219932	0.000238802
6	rs176461	0	28934384	G	A	407	rs176461_G	0.34203	0.463533
6	rs209165	0	28937465	C	A	408	rs209165_C	0.332701	0.182011
6	rs3132389	0	28939000	C	A	409	rs3132389_C	0.000613422	0.00065803
6	rs3132390	0	28940767	G	A	410	rs3132390_G	0.00267187	0.00155188
6	rs4713182	0	28941204	A	G	411	rs4713182_A	0.0231945	0.0234991
6	rs3132392	0	28946608	G	A	412	rs3132392_G	0.000287691	0.000310797
6	rs2894065	0	28947900	A	G	413	rs2894065_A	0.0210732	0.0205946
6	rs1016472	0	28959346	G	A	414	rs1016472_G	0.583804	0.405505
6	rs3135309	0	28963784	C	A	415	rs3135309_C	0.000197162	0.000213387
6	rs209139	0	28971462	A	C	416	rs209139_A	0.674866	0.642564
6	rs209131	0	28975734	G	A	417	rs209131_G	0.571637	0.470419
6	rs3132377	0	28993953	G	A	418	rs3132377_G	0.569254	0.464546
6	rs2230683	0	28999155	G	A	419	rs2230683_G	0.000252282	0.000272433
6	rs2894066	0	29001906	A	G	420	rs2894066_A	0.117681	0.169141
6	rs3763338	0	29002290	A	G	421	rs3763338_A	0.0223913	0.0315535
6	rs2015436	0	29004893	G	A	422	rs2015436_G	0.476036	0.35888
6	rs3118361	0	29006266	A	G	423	rs3118361_A	0.000532458	0.000597365
6	rs1004062	0	29010112	C	A	424	rs1004062_C	0.356915	0.325022
6	rs6912843	0	29012141	G	A	425	rs6912843_G	0.673941	0.560994
6	rs3130895	0	29013770	A	G	426	rs3130895_A	0.000314785	0.000344357
6	rs3131070	0	29014510	A	T	427	rs3131070_A	0.332771	0.305233
6	rs4713186	0	29017444	G	A	428	rs4713186_G	0.0189438	0.0164575
6	rs7761745	0	29017758	A	G	429	rs7761745_A	0.00514149	0.00765922
6	rs2071790	0	29019781	G	A	430	rs2071790_G	0.339865	0.314029
6	rs2071789	0	29020055	A	G	431	rs2071789_A	0.318276	0.147894
6	rs2071788	0	29020286	A	G	432	rs2071788_A	0.0368963	0.0463069
6	rs4947339	0	29024231	A	G	433	rs4947339_A	0.00359765	0.00303647
6	rs9257403	0	29024951	A	G	434	rs9257403_A	0.0367105	0.0190725
6	rs6456876	0	29026915	G	A	435	rs6456876_G	0.00478799	0.00397577
6	rs3131073	0	29028951	A	G	436	rs3131073_A	0.000232941	0.000236875
6	rs4947256	0	29029919	A	C	437	rs4947256_A	0.0672903	0.0827436
6	rs1476016	0	29030698	G	A	438	rs1476016_G	0.427321	0.37697
6	rs3130845	0	29031346	G	A	439	rs3130845_G	0.000311832	0.000344696
6	rs12386522	0	29036146	G	A	440	rs12386522_G	0.275614	0.381379
6	rs9257425	0	29044535	G	A	441	rs9257425_G	0.658533	0.489194
6	rs6933672	0	29049667	A	G	442	rs6933672_A	0.952985	0.946683
6	rs16894533	0	29053501	A	G	443	rs16894533_A	0.256875	0.174561
6	rs3135322	0	29054899	A	G	444	rs3135322_A	0.334742	0.296166
6	rs3130837	0	29056071	A	C	445	rs3130837_A	0.000283737	0.000310966
6	rs9257445	0	29057185	C	G	446	rs9257445_C	0.147908	0.150094
6	rs968722	0	29057883	A	G	447	rs968722_A	0.259669	0.301652
6	rs3130888	0	29057939	G	A	448	rs3130888_G	0.000263012	0.000283982
6	rs6904975	0	29060014	A	G	449	rs6904975_A	0.0215823	0.017189
6	rs3129791	0	29062272	A	G	450	rs3129791_A	0.000205003	0.000222951
6	rs3129792	0	29064395	A	G	451	rs3129792_A	0.318762	0.282308
6	rs6934470	0	29064730	G	A	452	rs6934470_G	0.167993	0.104336
6	rs9468458	0	29065562	A	G	453	rs9468458_A	0.0469967	0.0780312
6	rs7776164	0	29066437	A	C	454	rs7776164_A	0.554038	0.48099
6	rs16894540	0	29069798	G	A	455	rs16894540_G	0.154922	0.121423
6	rs6456880	0	29071227	C	A	456	rs6456880_C	0.00177264	0.0015643
6	rs9468459	0	29073670	A	G	457	rs9468459_A	0.409978	0.481722
6	rs6920392	0	29075017	G	A	458	rs6920392_G	0.00220172	0.00185036
6	rs6906909	0	29076125	G	A	459	rs6906909_G	0.0026545	0.00224414
6	rs9257453	0	29076909	G	A	460	rs9257453_G	0.298017	0.241578
6	rs9295784	0	29077127	C	A	461	rs9295784_C	0.307984	0.363721
6	rs6456881	0	29078079	A	G	462	rs6456881_A	0.271956	0.312458
6	rs3129793	0	29078155	G	A	463	rs3129793_G	0.341946	0.298188
6	rs9257455	0	29078724	A	G	464	rs9257455_A	0.0210138	0.0168378
6	rs6925178	0	29081194	A	C	465	rs6925178_A	0.158889	0.16102
6	rs3130893	0	29088686	G	A	466	rs3130893_G	0.000194844	0.000231896
6	rs6930903	0	29089223	G	A	467	rs6930903_G	0.135712	0.140048
6	rs6916923	0	29092142	A	G	468	rs6916923_A	0.503766	0.433311
6	rs9468464	0	29092491	G	A	469	rs9468464_G	0.164876	0.203574
6	rs3129795	0	29092734	A	C	470	rs3129795_A	0.435353	0.341015
6	rs9380103	0	29093184	G	A	471	rs9380103_G	0.0486488	0.0553032
6	rs6941946	0	29096562	G	A	472	rs6941946_G	0.00409432	0.0032338
6	rs2394513	0	29100487	A	G	473	rs2394513_A	0.509857	0.424246
6	rs7741520	0	29102549	G	A	474	rs7741520_G	0.206662	0.20347
6	rs10484544	0	29103698	G	A	475	rs10484544_G	0.157244	0.121176
6	rs4713197	0	29105564	C	A	476	rs4713197_C	0.0608728	0.106818
6	rs16894557	0	29107805	A	G	477	rs16894557_A	0.233676	0.132893
6	rs7755402	0	29110041	G	A	478	rs7755402_G	0.157244	0.121176
6	rs9468471	0	29112070	A	G	479	rs9468471_A	0.198061	0.194171
6	rs9468473	0	29114229	A	G	480	rs9468473_A	0.20151	0.198784
6	rs7743837	0	29114823	G	A	481	rs7743837_G	0.0332325	0.0357034
6	rs6919044	0	29117547	G	A	482	rs6919044_G	0.197742	0.195336
6	rs12333226	0	29117922	A	T	483	rs12333226_A	0.241125	0.345289
6	rs6456889	0	29118803	G	A	484	rs6456889_G	0.202939	0.200223
6	rs2050230	0	29119906	A	G	485	rs2050230_A	0.325022	0.284721
6	rs2143574	0	29122005	A	G	486	rs2143574_A	0.00272772	0.00227817
6	rs3130756	0	29125080	G	A	487	rs3130756_G	0.388851	0.336262
6	rs9348819	0	29127211	A	G	488	rs9348819_A	0.0713439	0.0762561
6	rs7747023	0	29133659	G	A	489	rs7747023_G	0.288065	0.328149
6	rs3117143	0	29139121	A	C	490	rs3117143_A	0.000219026	0.000241637
6	rs12665818	0	29140163	T	A	491	rs12665818_T	0.122298	0.0949024
6	rs6918175	0	29147209	C	A	492	rs6918175_C	0.125194	0.0972322
6	rs6456895	0	29147874	A	G	493	rs6456895_A	0.00293761	0.00241575
6	rs3131083	0	29147956	G	A	494	rs3131083_G	0.396431	0.348277
6	rs6456897	0	29149262	G	A	495	rs6456897_G	0.180393	0.111445
6	rs9348821	0	29155182	G	A	496	rs9348821_G	0.290423	0.330099
6	rs11758255	0	29158693	G	A	497	rs11758255_G	0.203753	0.201209
6	rs6903771	0	29160551	A	G	498	rs6903771_A	0.311092	0.354449
6	rs3129788	0	29165618	A	G	499	rs3129788_A	0.00021419	0.000239036
6	rs9380109	0	29165950	G	A	500	rs9380109_G	0.00276409	0.00226903
6	rs2142905	0	29172751	G	A	501	rs2142905_G	0.0143047	0.0117605
6	rs4713201	0	29175242	G	A	502	rs4713201_G	0.0460854	0.0514424
6	rs3129111	0	29175751	A	G	503	rs3129111_A	0.56895	0.480903
6	rs3131091	0	29181073	G	A	504	rs3131091_G	0.407621	0.358635
6	rs6456908	0	29183051	A	G	505	rs6456908_A	0.207582	0.205237
6	rs3749977	0	29188323	A	G	506	rs3749977_A	0.204326	0.202056
6	rs3129106	0	29189140	C	A	507	rs3129106_C	0.148985	0.130559
6	rs3130766	0	29194808	G	A	508	rs3130766_G	0.390624	0.342987
6	rs2064162	0	29196794	G	A	509	rs2064162_G	0.00339202	0.00275869
6	rs3130772	0	29200558	G	C	510	rs3130772_G	0.00501734	0.00427493
6	rs3130773	0	29203887	A	G	511	rs3130773_A	0.000416988	0.000458232
6	rs3130778	0	29207558	A	G	512	rs3130778_A	0.00475503	0.00344991
6	rs2267632	0	29214447	A	G	513	rs2267632_A	0.833054	0.942917
6	rs9468487	0	29215031	G	A	514	rs9468487_G	0.246983	0.307665
6	rs9393945	0	29216270	C	G	515	rs9393945_C	0.0499892	0.0555974
6	rs9368592	0	29221576	A	C	516	rs9368592_A	0.0493563	0.0551427
6	rs3116846	0	29222595	A	G	517	rs3116846_A	0.448033	0.394339
6	rs3130724	0	29226509	A	C	518	rs3130724_A	0.393726	0.360547
6	rs3116847	0	29226792	G	A	519	rs3116847_G	0.131127	0.121084
6	rs3129123	0	29227138	A	G	520	rs3129123_A	0.148119	0.138956
6	rs3129126	0	29229610	A	G	521	rs3129126_A	0.377435	0.331779
6	rs3129131	0	29233381	G	A	522	rs3129131_G	0.18778	0.18917
6	rs3130737	0	29243187	A	G	523	rs3130737_A	0.146312	0.135659
6	rs3130738	0	29244089	A	G	524	rs3130738_A	0.126785	0.126649
6	rs2394520	0	29245199	G	A	525	rs2394520_G	0.0158317	0.0126397
6	rs3129151	0	29246294	A	G	526	rs3129151_A	0.379166	0.347318
6	rs3129152	0	29246756	C	A	527	rs3129152_C	0.279795	0.230054
6	rs3129154	0	29247765	G	A	528	rs3129154_G	0.213073	0.21513
6	rs2206042	0	29250455	C	A	529	rs2206042_C	0.19439	0.195224
6	rs3130745	0	29256598	A	C	530	rs3130745_A	0.148894	0.139046
6	rs2006752	0	29259291	A	G	531	rs2006752_A	0.12117	0.11614
6	rs3116820	0	29259650	G	A	532	rs3116820_G	0.151299	0.141401
6	rs9257593	0	29260773	A	G	533	rs9257593_A	0.556067	0.517786
6	rs3116826	0	29269414	A	G	534	rs3116826_A	0.15359	0.144195
6	rs3116830	0	29275554	A	G	535	rs3116830_A	0.000478067	0.00053587
6	rs760804	0	29279018	A	G	536	rs760804_A	0.386649	0.35147
6	rs10452602	0	29281066	A	G	537	rs10452602_A	0.0228852	0.139478
6	rs3116832	0	29287124	G	C	538	rs3116832_G	0.108913	0.101583
6	rs9257616	0	29288700	A	G	539	rs9257616_A	0.352148	0.256613
6	rs2894083	0	29290287	G	A	540	rs2894083_G	0.486308	0.451863
6	rs3129096	0	29291325	G	A	541	rs3129096_G	0.508837	0.472847
6	rs3129098	0	29293266	G	A	542	rs3129098_G	0.470266	0.436116
6	rs3130803	0	29297134	A	G	543	rs3130803_A	0.122805	0.114804
6	rs6904165	0	29299368	A	G	544	rs6904165_A	0.687046	0.584107
6	rs714470	0	29299390	C	A	545	rs714470_C	0.395648	0.367006
6	rs12660419	0	29299527	A	G	546	rs12660419_A	0.277676	0.162829
6	rs3130812	0	29301764	A	G	547	rs3130812_A	0.38037	0.365883
6	rs11962388	0	29301838	G	A	548	rs11962388_G	0.248786	0.163714
6	rs11964645	0	29301968	G	A	549	rs11964645_G	0.157281	0.113544
6	rs3130813	0	29302990	G	A	550	rs3130813_G	0.444713	0.412195
6	rs3130814	0	29304160	C	A	551	rs3130814_C	0.448294	0.399022
6	rs2207338	0	29307803	C	A	552	rs2207338_C	0.778463	0.794131
6	rs3129105	0	29321049	C	A	553	rs3129105_C	0.343226	0.331583
6	rs3117330	0	29333774	A	G	554	rs3117330_A	0.772543	0.790131
6	rs3117329	0	29335622	G	A	555	rs3117329_G	0.804478	0.716464
6	rs3130827	0	29338662	A	G	556	rs3130827_A	0.783109	0.798692
6	rs16894681	0	29340051	C	A	557	rs16894681_C	0.653848	0.722767
6	rs10484545	0	29342489	C	G	558	rs10484545_C	0.650911	0.539277
6	rs6904130	0	29343172	G	A	559	rs6904130_G	0.566519	0.468681
6	rs3130829	0	29343879	A	G	560	rs3130829_A	0.4352	0.40779
6	rs7766902	0	29344624	A	C	561	rs7766902_A	0.0793327	0.0911441
6	rs3130830	0	29344701	G	A	562	rs3130830_G	0.813779	0.725691
6	rs6942318	0	29345994	A	G	563	rs6942318_A	0.567048	0.467951
6	rs9257660	0	29348258	A	G	564	rs9257660_A	0.291568	0.204062
6	rs3117326	0	29348357	A	G	565	rs3117326_A	0.000497263	0.000557539
6	rs3130834	0	29356128	G	A	566	rs3130834_G	0.000493269	0.000551881
6	rs9468508	0	29361735	A	G	567	rs9468508_A	0.398063	0.490007
6	rs6901923	0	29361866	A	G	568	rs6901923_A	0.138032	0.0833115
6	rs1884123	0	29364399	A	G	569	rs1884123_A	0.796766	0.791259
6	rs1123283	0	29366842	A	T	570	rs1123283_A	0.285777	0.238376
6	rs4446587	0	29367602	G	A	571	rs4446587_G	0.398647	0.358193
6	rs3117425	0	29368410	A	G	572	rs3117425_A	0.00116042	0.00108632
6	rs3117439	0	29374462	A	G	573	rs3117439_A	0.00103857	0.000932136
6	rs16867628	0	29374476	A	G	574	rs16867628_A	0.254766	0.149909
6	rs9257691	0	29376908	C	A	575	rs9257691_C	0.76186	0.66335
6	rs4594993	0	29378477	G	A	576	rs4594993_G	0.275852	0.301635
6	rs9348826	0	29378774	G	C	577	rs9348826_G	0.10597	0.11045
6	rs3117426	0	29379991	A	G	578	rs3117426_A	0.204136	0.224945
6	rs16894709	0	29380280	A	G	579	rs16894709_A	0.210615	0.234653
6	rs3117427	0	29382115	G	A	580	rs3117427_G	0.00102096	0.00099013
6	rs9257693	0	29382327	G	A	581	rs9257693_G	0.688742	0.588793
6	rs7774255	0	29382335	A	T	582	rs7774255_A	0.702532	0.600884
6	rs9257694	0	29382465	A	G	583	rs9257694_A	0.529149	0.399715
6	rs17404424	0	29383277	A	G	584	rs17404424_A	0.874604	0.62518
6	rs9257696	0	29383486	G	A	585	rs9257696_G	0.00650403	0.0150054
6	rs9257710	0	29390965	G	A	586	rs9257710_G	0.307484	0.336306
6	rs9257711	0	29391422	A	G	587	rs9257711_A	0.00142789	0.00225554
6	rs3129683	0	29394649	G	C	588	rs3129683_G	0.00112831	0.00170832
6	rs16894722	0	29400009	G	A	589	rs16894722_G	0.870751	0.968937
6	rs12660111	0	29404127	A	G	590	rs12660111_A	0.0563672	0.0467627
6	rs9357078	0	29405645	A	G	591	rs9357078_A	0.215497	0.217055
6	rs9257731	0	29407350	A	G	592	rs9257731_A	0.307484	0.336306
6	rs6930435	0	29409201	A	G	593	rs6930435_A	0.00622504	0.00940594
6	rs6903989	0	29410009	A	C	594	rs6903989_A	0.0066901	0.0110207
6	rs9257745	0	29414635	A	G	595	rs9257745_A	0.00782464	0.0181008
6	rs9257749	0	29418620	C	A	596	rs9257749_C	0.315243	0.342394
6	rs1014258	0	29418660	A	G	597	rs1014258_A	0.00586708	0.00906633
6	rs10447393	0	29424831	A	G	598	rs10447393_A	0.696666	0.638636
6	rs9257768	0	29430065	A	G	599	rs9257768_A	0.307484	0.336306
6	rs3117438	0	29431238	G	A	600	rs3117438_G	0.308051	0.399944
6	rs7761746	0	29431634	A	G	601	rs7761746_A	0.563104	0.938246
6	rs9257770	0	29431817	C	A	602	rs9257770_C	0.00164191	0.00258093
6	rs6930033	0	29431884	C	A	603	rs6930033_C	0.0695266	0.0590477
6	rs4713210	0	29433412	A	G	604	rs4713210_A	0.216516	0.215712
6	rs9257775	0	29435058	G	A	605	rs9257775_G	0.895067	0.97196
6	rs9257792	0	29442418	G	A	606	rs9257792_G	0.0013783	0.0069312
6	rs9257793	0	29443133	G	A	607	rs9257793_G	0.00824997	0.00461129
6	rs16894773	0	29443461	A	G	608	rs16894773_A	0.956574	0.827441
6	rs9380120	0	29443516	G	A	609	rs9380120_G	0.199133	0.199031
6	rs9257794	0	29443640	A	G	610	rs9257794_A	0.0840347	0.141983
6	rs6934993	0	29445479	G	A	611	rs6934993_G	0.0754151	0.127443
6	rs4713213	0	29446941	G	A	612	rs4713213_G	0.990819	0.944944
6	rs9257799	0	29447250	G	A	613	rs9257799_G	0.0224098	0.0248048
6	rs10807053	0	29448564	C	G	614	rs10807053_C	0.780796	0.816914
6	rs9257800	0	29448722	A	G	615	rs9257800_A	0.000455549	0.00058297
6	rs7772982	0	29448986	G	A	616	rs7772982_G	0.00404007	0.00591167
6	rs7753474	0	29449287	A	G	617	rs7753474_A	0.00382316	0.00559467
6	rs7774029	0	29449602	G	A	618	rs7774029_G	0.0548193	0.0655375
6	rs9380122	0	29450215	G	A	619	rs9380122_G	0.82606	0.731034
6	rs3749971	0	29450754	A	G	620	rs3749971_A	0.00107074	0.00144346
6	rs5003264	0	29451968	A	C	621	rs5003264_A	0.386115	0.417308
6	rs238883	0	29454205	G	A	622	rs238883_G	0.177743	0.156285
6	rs9257805	0	29454308	G	A	623	rs9257805_G	0.00254383	0.00149403
6	rs238881	0	29454968	G	A	624	rs238881_G	0.751449	0.795422
6	rs238880	0	29455023	A	G	625	rs238880_A	0.37476	0.402429
6	rs3129688	0	29456276	G	A	626	rs3129688_G	0.878334	0.946462
6	rs3117442	0	29457070	G	A	627	rs3117442_G	0.782103	0.830114
6	rs238876	0	29457588	A	G	628	rs238876_A	0.347567	0.373908
6	rs1419640	0	29458833	C	A	629	rs1419640_C	0.78776	0.765979
6	rs238873	0	29459620	G	A	630	rs238873_G	0.0102108	0.00856892
6	rs238872	0	29459852	G	A	631	rs238872_G	0.389945	0.366014
6	rs3117444	0	29460922	A	G	632	rs3117444_A	0.338176	0.335757
6	rs3129681	0	29462362	G	A	633	rs3129681_G	0.349291	0.349455
6	rs3094552	0	29462600	A	G	634	rs3094552_A	0.351038	0.349952
6	rs3094551	0	29462778	A	G	635	rs3094551_A	0.158386	0.186557
6	rs3094550	0	29462788	C	A	636	rs3094550_C	0.133891	0.159744
6	rs238869	0	29463092	G	A	637	rs238869_G	0.988163	0.947616
6	rs3094549	0	29463127	C	A	638	rs3094549_C	0.000434906	0.000787378
6	rs3094548	0	29463181	G	C	639	rs3094548_G	0.611416	0.618591
6	rs11966698	0	29463217	A	G	640	rs11966698_A	0.679425	0.521493
6	rs1419639	0	29463473	C	A	641	rs1419639_C	0.0231162	0.0190993
6	rs1419638	0	29463498	A	G	642	rs1419638_A	0.0575336	0.0713097
6	rs1419637	0	29463537	T	A	643	rs1419637_T	0.331504	0.341012
6	rs1419635	0	29463897	G	A	644	rs1419635_G	0.678797	0.576887
6	rs4711185	0	29464025	A	G	645	rs4711185_A	0.796659	0.715688
6	rs9380123	0	29464097	A	G	646	rs9380123_A	0.560347	0.46978
6	rs9257809	0	29464310	G	A	647	rs9257809_G	0.00019376	0.000341387
6	rs379157	0	29464566	G	A	648	rs379157_G	0.771166	0.688263
6	rs442694	0	29464666	A	C	649	rs442694_A	0.000578252	0.000778047
6	rs9257812	0	29465000	A	G	650	rs9257812_A	0.517942	0.531279
6	rs9393956	0	29465624	G	A	651	rs9393956_G	0.0353656	0.0414944
6	rs1592404	0	29466655	C	G	652	rs1592404_C	0.654516	0.555783
6	rs9257819	0	29468162	C	A	653	rs9257819_C	0.537718	0.549173
6	rs9257820	0	29468248	A	C	654	rs9257820_A	0.500647	0.517916
6	rs3128850	0	29469012	G	A	655	rs3128850_G	0.823697	0.995942
6	rs2022077	0	29469103	T	A	656	rs2022077_T	0.530291	0.541921
6	rs16894836	0	29469686	C	A	657	rs16894836_C	0.705842	0.744221
6	rs9257823	0	29469714	A	G	658	rs9257823_A	0.510947	0.522669
6	rs7753592	0	29470047	T	A	659	rs7753592_T	0.258325	0.152599
6	rs9257825	0	29470675	G	A	660	rs9257825_G	0.523556	0.538431
6	rs9257828	0	29471676	A	G	661	rs9257828_A	0.357706	0.345512
6	rs4713217	0	29472304	G	A	662	rs4713217_G	0.501504	0.514313
6	rs9257834	0	29472594	A	C	663	rs9257834_A	0.498288	0.51037
6	rs2073154	0	29472794	G	C	664	rs2073154_G	0.492059	0.503596
6	rs2073151	0	29472930	A	G	665	rs2073151_A	0.506396	0.518215
6	rs2073149	0	29473402	T	A	666	rs2073149_T	0.893229	0.827623
6	rs7770882	0	29473624	A	G	667	rs7770882_A	0.887408	0.822229
6	rs4713218	0	29473953	A	G	668	rs4713218_A	0.530854	0.542985
6	rs1028411	0	29475378	C	A	669	rs1028411_C	0.527071	0.53927
6	rs4713220	0	29475477	A	T	670	rs4713220_A	0.490684	0.509577
6	rs9257837	0	29476000	A	G	671	rs9257837_A	0.677481	0.824224
6	rs9257843	0	29476644	G	A	672	rs9257843_G	0.867495	0.80003
6	rs9405124	0	29476792	G	A	673	rs9405124_G	0.611543	0.517147
6	rs2394604	0	29477247	A	C	674	rs2394604_A	0.79979	0.962624
6	rs2394607	0	29477498	G	A	675	rs2394607_G	0.351126	0.339724
6	rs1419634	0	29477651	A	C	676	rs1419634_A	0.465899	0.484954
6	rs1362061	0	29479144	G	C	677	rs1362061_G	0.637751	0.541063
6	rs429479	0	29480302	G	A	678	rs429479_G	7.10043e-05	0.000129712
6	rs2394608	0	29480408	G	A	679	rs2394608_G	0.677683	0.801447
6	rs1419632	0	29481228	C	A	680	rs1419632_C	0.884841	0.823721
6	rs406511	0	29484364	C	G	681	rs406511_C	0.000101955	0.000184786
6	rs12192194	0	29487870	G	A	682	rs12192194_G	0.8158	0.981995
6	rs1544403	0	29489885	G	A	683	rs1544403_G	0.0425469	0.0485011
6	rs720497	0	29490412	C	G	684	rs720497_C	0.219657	0.354577
6	rs1362073	0	29491299	A	G	685	rs1362073_A	0.849185	0.948536
6	rs16894861	0	29491373	A	G	686	rs16894861_A	0.592273	0.508972
6	rs10807055	0	29492110	G	A	687	rs10807055_G	0.816106	0.979783
6	rs3131024	0	29493216	A	G	688	rs3131024_A	0.726743	0.812363
6	rs1011985	0	29493751	G	C	689	rs1011985_G	0.12589	0.161501
6	rs16894876	0	29494728	A	G	690	rs16894876_A	0.592273	0.508972
6	rs3094562	0	29496285	G	A	691	rs3094562_G	0.46166	0.42211
6	rs2523421	0	29498419	G	A	692	rs2523421_G	0.268979	0.225753
6	rs1419643	0	29499915	C	A	693	rs1419643_C	0.189963	0.313561
6	rs2746148	0	29500951	G	A	694	rs2746148_G	0.824815	0.819087
6	rs2074470	0	29502406	G	A	695	rs2074470_G	0.556988	0.512759
6	rs9257857	0	29502905	A	G	696	rs9257857_A	0.533387	0.68203
6	rs16894900	0	29503478	G	C	697	rs16894900_G	0.00322165	0.00333279
6	rs7770592	0	29503726	A	C	698	rs7770592_A	0.843019	0.951743
6	rs7757269	0	29504196	G	A	699	rs7757269_G	0.243534	0.134262
6	rs10946990	0	29504625	G	A	700	rs10946990_G	0.64321	0.544209
6	rs7349908	0	29505500	A	T	701	rs7349908_A	0.63474	0.534963
6	rs3131025	0	29506794	A	G	702	rs3131025_A	0.478022	0.437499
6	rs16894908	0	29510414	A	G	703	rs16894908_A	0.00703855	0.0374489
6	rs6908560	0	29511251	A	G	704	rs6908560_A	0.708758	0.51627
6	rs3094561	0	29512136	A	C	705	rs3094561_A	0.462108	0.583584
6	rs9468532	0	29515357	G	A	706	rs9468532_G	0.740909	0.947884
6	rs6933601	0	29515581	A	G	707	rs6933601_A	0.283312	0.547513
6	rs116162459	0	29515934	A	G	708	rs116162459_A	0.948522	0.717909
6	rs2074469	0	29515949	G	A	709	rs2074469_G	0.522323	0.802708
6	rs11755177	0	29515954	A	G	710	rs11755177_A	0.848871	0.480691
6	rs11755182	0	29516036	A	C	711	rs11755182_A	0.923915	0.670884
6	rs2074468	0	29516249	A	G	712	rs2074468_A	0.0118809	0.031094
6	rs2074466	0	29516292	A	C	713	rs2074466_A	0.739011	0.903985
6	rs10946991	0	29516533	C	A	714	rs10946991_C	0.00768902	0.022739
6	rs11968123	0	29516700	C	A	715	rs11968123_C	0.79503	0.959729
6	rs10946992	0	29518680	G	A	716	rs10946992_G	0.00640051	0.0362644
6	rs1535039	0	29519411	G	A	717	rs1535039_G	0.000611484	0.00081306
6	rs16894919	0	29520201	A	C	718	rs16894919_A	0.0057467	0.0338043
6	rs7738742	0	29522325	G	A	719	rs7738742_G	0.191014	0.409365
6	rs7739243	0	29522592	G	A	720	rs7739243_G	0.00387666	0.0246044
6	rs2523443	0	29523443	A	C	721	rs2523443_A	0.000504231	0.000672361
6	rs6906897	0	29523615	A	G	722	rs6906897_A	0.00387666	0.0246044
6	rs6929603	0	29523631	G	A	723	rs6929603_G	0.318021	0.562231
6	rs6935708	0	29524631	G	A	724	rs6935708_G	0.0682053	0.22801
6	rs2523442	0	29525796	G	A	725	rs2523442_G	0.164802	0.105667
6	rs7738548	0	29529188	A	G	726	rs7738548_A	0.00404048	0.0204389
6	rs3094574	0	29530071	A	G	727	rs3094574_A	0.465414	0.614083
6	rs2523440	0	29530222	G	A	728	rs2523440_G	0.935412	0.874774
6	rs9257863	0	29533563	C	A	729	rs9257863_C	0.646257	0.811954
6	rs3117194	0	29533987	A	G	730	rs3117194_A	0.550845	0.688963
6	rs6456951	0	29534182	A	T	731	rs6456951_A	0.00404048	0.0204389
6	rs2523439	0	29535499	A	G	732	rs2523439_A	0.314611	0.207288
6	rs2021729	0	29537371	A	G	733	rs2021729_A	0.301056	0.19724
6	rs2073148	0	29538149	G	A	734	rs2073148_G	0.003618	0.019111
6	rs3128854	0	29539677	A	G	735	rs3128854_A	0.598967	0.740556
6	rs1345228	0	29540369	G	A	736	rs1345228_G	0.54492	0.706527
6	rs2107192	0	29541921	A	G	737	rs2107192_A	0.30457	0.198757
6	rs2107191	0	29542274	G	A	738	rs2107191_G	0.541252	0.678914
6	rs4713226	0	29542393	A	G	739	rs4713226_A	0.709322	0.66203
6	rs2746149	0	29543334	G	A	740	rs2746149_G	0.000561729	0.000762158
6	rs11961170	0	29547084	T	A	741	rs11961170_T	0.00859624	0.0178848
6	rs16894948	0	29548236	A	G	742	rs16894948_A	0.003618	0.019111
6	rs11966831	0	29548341	A	C	743	rs11966831_A	0.104015	0.0610841
6	rs12206077	0	29548720	A	G	744	rs12206077_A	0.371341	0.319466
6	rs1362077	0	29548967	A	G	745	rs1362077_A	0.648534	0.717958
6	rs1362076	0	29549148	A	C	746	rs1362076_A	0.678775	0.961213
6	rs7751705	0	29549597	A	G	747	rs7751705_A	0.270997	0.658426
6	rs2746150	0	29550680	A	G	748	rs2746150_A	0.000541635	0.00072922
6	rs2523444	0	29550810	A	G	749	rs2523444_A	0.552545	0.56104
6	rs7769924	0	29551905	G	A	750	rs7769924_G	0.30568	0.679925
6	rs1233495	0	29552100	A	G	751	rs1233495_A	0.00506757	0.0117314
6	rs3094573	0	29554611	C	A	752	rs3094573_C	0.675714	0.825465
6	rs11963957	0	29554834	A	G	753	rs11963957_A	0.532916	0.82716
6	rs7771335	0	29556017	G	A	754	rs7771335_G	0.30568	0.679925
6	rs17415601	0	29560390	G	A	755	rs17415601_G	0.338588	0.475156
6	rs10484547	0	29560753	C	G	756	rs10484547_C	0.211143	0.559083
6	rs2066951	0	29562468	C	A	757	rs2066951_C	0.355468	0.755237
6	rs9348832	0	29564000	A	G	758	rs9348832_A	0.151316	0.195863
6	rs11756938	0	29564633	A	G	759	rs11756938_A	0.838767	0.894726
6	rs1233492	0	29566456	G	A	760	rs1233492_G	0.273618	0.176772
6	rs3128844	0	29567239	G	C	761	rs3128844_G	0.630813	0.777205
6	rs1233491	0	29569709	C	G	762	rs1233491_C	0.00051597	0.000694671
6	rs1233490	0	29569893	G	A	763	rs1233490_G	0.26968	0.174741
6	rs1233489	0	29571022	A	T	764	rs1233489_A	0.000400695	0.000566447
6	rs6906307	0	29571871	C	A	765	rs6906307_C	0.365482	0.753829
6	rs2746147	0	29574587	A	G	766	rs2746147_A	0.317766	0.207691
6	rs1345227	0	29574935	G	A	767	rs1345227_G	0.659237	0.541041
6	rs7766082	0	29575985	G	A	768	rs7766082_G	0.355036	0.750808
6	rs7746192	0	29576186	A	G	769	rs7746192_A	0.566218	0.397852
6	rs1233487	0	29576788	G	A	770	rs1233487_G	0.00609659	0.0135764
6	rs9257873	0	29576947	C	A	771	rs9257873_C	0.677711	0.846393
6	rs1233486	0	29577631	A	G	772	rs1233486_A	0.28411	0.18387
6	rs1234843	0	29577919	G	A	773	rs1234843_G	0.348317	0.254965
6	rs1233485	0	29578187	G	A	774	rs1233485_G	0.212237	0.188522
6	rs3131019	0	29578964	C	A	775	rs3131019_C	0.659422	0.51255
6	rs16894986	0	29579851	G	C	776	rs16894986_G	0.649014	0.718556
6	rs11961013	0	29579913	A	G	777	rs11961013_A	0.237995	0.133096
6	rs757256	0	29580895	A	G	778	rs757256_A	0.756431	0.601076
6	rs3130858	0	29581480	C	A	779	rs3130858_C	0.855915	0.96295
6	rs734959	0	29582641	G	A	780	rs734959_G	0.569402	0.431344
6	rs734961	0	29583018	A	C	781	rs734961_A	0.855416	0.988827
6	rs734960	0	29583121	A	G	782	rs734960_A	0.835597	0.988036
6	rs1233482	0	29583661	A	C	783	rs1233482_A	0.267724	0.174105
6	rs3131020	0	29583881	A	G	784	rs3131020_A	0.746713	0.598569
6	rs3131021	0	29584121	A	G	785	rs3131021_A	0.889161	0.612888
6	rs3128847	0	29584304	A	G	786	rs3128847_A	0.599805	0.733334
6	rs9257877	0	29584487	A	C	787	rs9257877_A	0.788465	0.722221
6	rs3131022	0	29584663	C	G	788	rs3131022_C	0.466387	0.432412
6	rs1557820	0	29585219	A	G	789	rs1557820_A	0.529724	0.472629
6	rs1557819	0	29585252	C	A	790	rs1557819_C	0.530352	0.47299
6	rs4959120	0	29585274	C	G	791	rs4959120_C	0.434892	0.395936
6	rs1233480	0	29585393	A	G	792	rs1233480_A	0.00435159	0.00344915
6	rs2158281	0	29585762	G	C	793	rs2158281_G	0.523941	0.46653
6	rs9357082	0	29585836	G	A	794	rs9357082_G	0.0331227	0.0377717
6	rs2285792	0	29586149	G	A	795	rs2285792_G	0.726606	0.888295
6	rs2285791	0	29586280	A	G	796	rs2285791_A	0.726407	0.841632
6	rs3094572	0	29588972	A	G	797	rs3094572_A	0.627208	0.483147
6	rs2523433	0	29590411	A	G	798	rs2523433_A	0.395479	0.268936
6	rs1592412	0	29591818	A	C	799	rs1592412_A	0.692742	0.540874
6	rs1592410	0	29591947	A	G	800	rs1592410_A	0.591205	0.521614
6	rs1015869	0	29592645	A	G	801	rs1015869_A	0.597311	0.530998
6	rs9257887	0	29593268	A	G	802	rs9257887_A	0.868724	0.987175
6	rs2189372	0	29594044	G	A	803	rs2189372_G	0.567557	0.505556
6	rs2859876	0	29594194	C	G	804	rs2859876_C	0.605196	0.538851
6	rs3094564	0	29594324	G	A	805	rs3094564_G	0.655876	0.513032
6	rs16894996	0	29594592	A	G	806	rs16894996_A	0.781985	0.857358
6	rs9257890	0	29594887	A	G	807	rs9257890_A	0.690782	0.853378
6	rs2745400	0	29596228	A	G	808	rs2745400_A	0.00776572	0.00387733
6	rs2523429	0	29596395	A	C	809	rs2523429_A	0.0231263	0.0121562
6	rs2745401	0	29596457	G	A	810	rs2745401_G	0.0694267	0.0609899
6	rs3130855	0	29596555	A	C	811	rs3130855_A	0.0843284	0.109747
6	rs1419644	0	29596616	T	A	812	rs1419644_T	0.565286	0.809493
6	rs724078	0	29597027	A	G	813	rs724078_A	0.0403445	0.051759
6	rs7752486	0	29600542	A	C	814	rs7752486_A	0.0480808	0.0238387
6	rs969931	0	29602876	C	A	815	rs969931_C	0.0242725	0.0118395
6	rs2745406	0	29604062	G	A	816	rs2745406_G	0.027301	0.0136673
6	rs6939431	0	29604199	A	G	817	rs6939431_A	0.189288	0.227626
6	rs1233427	0	29604643	A	G	818	rs1233427_A	0.0125072	0.00924808
6	rs9501676	0	29604755	A	G	819	rs9501676_A	0.121451	0.0667368
6	rs9501677	0	29604981	A	G	820	rs9501677_A	0.232865	0.555386
6	rs1233426	0	29606081	A	G	821	rs1233426_A	0.0121112	0.00896047
6	rs1233425	0	29606476	G	C	822	rs1233425_G	0.0294245	0.0148869
6	rs1233424	0	29607168	A	G	823	rs1233424_A	0.323632	0.398444
6	rs362546	0	29607395	G	A	824	rs362546_G	0.00481511	0.00354493
6	rs909968	0	29607484	A	G	825	rs909968_A	0.011476	0.00877256
6	rs909967	0	29607516	G	A	826	rs909967_G	0.0256517	0.0124316
6	rs886381	0	29608204	A	G	827	rs886381_A	0.397494	0.259442
6	rs362544	0	29608266	G	A	828	rs362544_G	0.0138579	0.00753748
6	rs9468551	0	29608906	A	G	829	rs9468551_A	0.260284	0.592583
6	rs9968	0	29609016	C	G	830	rs9968_C	0.00250405	0.00198755
6	rs2294748	0	29609161	A	G	831	rs2294748_A	0.823097	0.894096
6	rs16895022	0	29609199	A	G	832	rs16895022_A	0.0847951	0.0757153
6	rs9461533	0	29609401	G	A	833	rs9461533_G	0.0615055	0.0336009
6	rs1233421	0	29609493	A	C	834	rs1233421_A	0.00182203	0.00118516
6	rs6456964	0	29610107	A	G	835	rs6456964_A	0.209257	0.51728
6	rs1233420	0	29611302	G	A	836	rs1233420_G	0.0128214	0.00637996
6	rs6930217	0	29611761	G	A	837	rs6930217_G	0.963711	0.896627
6	rs419957	0	29613748	G	C	838	rs419957_G	0.00431546	0.00345073
6	rs3025672	0	29614014	A	G	839	rs3025672_A	0.90801	0.832015
6	rs414282	0	29614239	G	A	840	rs414282_G	0.0192127	0.0183487
6	rs3025670	0	29614270	G	A	841	rs3025670_G	0.963711	0.896627
6	rs3025667	0	29615197	G	C	842	rs3025667_G	0.121451	0.0667368
6	rs362514	0	29615289	A	G	843	rs362514_A	0.0284676	0.0174453
6	rs446198	0	29615405	A	G	844	rs446198_A	0.00598667	0.00482838
6	rs6931702	0	29615550	A	G	845	rs6931702_A	0.00225832	0.015715
6	rs10484548	0	29616252	G	A	846	rs10484548_G	0.121451	0.0667368
6	rs362540	0	29618304	G	A	847	rs362540_G	0.0961967	0.0540558
6	rs362538	0	29618609	C	G	848	rs362538_C	0.450992	0.489018
6	rs1233417	0	29619829	G	A	849	rs1233417_G	0.0737305	0.0965412
6	rs426595	0	29620461	A	G	850	rs426595_A	0.0430856	0.0344724
6	rs407161	0	29621786	A	G	851	rs407161_A	0.0832551	0.0472914
6	rs398616	0	29622209	A	G	852	rs398616_A	0.0424944	0.0339861
6	rs3094575	0	29623781	A	G	853	rs3094575_A	0.0932524	0.114877
6	rs3094576	0	29624221	A	C	854	rs3094576_A	0.43952	0.499642
6	rs376681	0	29625072	G	A	855	rs376681_G	0.00702989	0.00587431
6	rs365488	0	29625937	A	G	856	rs365488_A	0.0232415	0.0124734
6	rs2745411	0	29626421	A	G	857	rs2745411_A	0.0744932	0.0402055
6	rs417374	0	29626451	G	A	858	rs417374_G	0.0197661	0.0104593
6	rs6902738	0	29626458	G	A	859	rs6902738_G	0.963711	0.896627
6	rs9368606	0	29626644	C	A	860	rs9368606_C	0.310485	0.245105
6	rs7763643	0	29626933	A	G	861	rs7763643_A	0.964175	0.896728
6	rs17351888	0	29627152	G	A	862	rs17351888_G	0.885686	0.769099
6	rs453658	0	29627827	G	A	863	rs453658_G	0.00768083	0.00644605
6	rs6915177	0	29630567	A	G	864	rs6915177_A	0.204409	0.511595
6	rs7757931	0	29631649	A	C	865	rs7757931_A	0.162894	0.415754
6	rs8337	0	29631655	C	G	866	rs8337_C	0.595483	0.516537
6	rs2076487	0	29631838	C	G	867	rs2076487_C	0.248161	0.583294
6	rs2076485	0	29631931	G	A	868	rs2076485_G	0.409812	0.275899
6	rs404240	0	29631936	G	A	869	rs404240_G	0.000623485	0.000745984
6	rs2534790	0	29632147	A	C	870	rs2534790_A	0.40544	0.272264
6	rs362536	0	29634919	A	G	871	rs362536_A	0.0231306	0.011995
6	rs64036	0	29635246	A	C	872	rs64036_A	0.160285	0.439156
6	rs1233406	0	29635560	C	A	873	rs1233406_C	0.384	0.459648
6	rs362535	0	29635600	G	A	874	rs362535_G	0.825412	0.901542
6	rs362513	0	29636297	G	A	875	rs362513_G	0.0296589	0.0236508
6	rs362533	0	29636876	C	G	876	rs362533_C	0.80223	0.981852
6	rs995185	0	29637116	A	T	877	rs995185_A	0.0567047	0.0573066
6	rs1233405	0	29637733	A	G	878	rs1233405_A	0.0083916	0.00687202
6	rs362532	0	29638392	G	A	879	rs362532_G	0.00986848	0.0491339
6	rs362531	0	29638434	A	G	880	rs362531_A	0.00491285	0.02759
6	rs362512	0	29638607	A	G	881	rs362512_A	0.0202914	0.00949023
6	rs362511	0	29638829	G	A	882	rs362511_G	0.0129349	0.0118641
6	rs362529	0	29638847	A	G	883	rs362529_A	0.193462	0.210163
6	rs362527	0	29639797	G	A	884	rs362527_G	0.146233	0.13152
6	rs2523447	0	29640718	A	G	885	rs2523447_A	0.108155	0.0587731
6	rs388234	0	29641274	G	A	886	rs388234_G	0.0269008	0.0219981
6	rs3094577	0	29641849	A	G	887	rs3094577_A	0.707768	0.548309
6	rs12525160	0	29643196	A	G	888	rs12525160_A	0.592284	0.584196
6	rs1235162	0	29645203	G	A	889	rs1235162_G	0.00211604	0.00257989
6	rs1233400	0	29645954	A	G	890	rs1233400_A	0.142118	0.145722
6	rs1003582	0	29646382	C	G	891	rs1003582_C	0.0546205	0.033158
6	rs1233399	0	29647461	A	G	892	rs1233399_A	0.0312988	0.0255838
6	rs3025651	0	29647893	C	A	893	rs3025651_C	0.838493	0.686208
6	rs1003581	0	29648183	A	G	894	rs1003581_A	0.999293	0.932274
6	rs982558	0	29648501	A	G	895	rs982558_A	0.831437	0.995302
6	rs3025650	0	29650926	G	A	896	rs3025650_G	0.809291	0.653282
6	rs362525	0	29651625	C	A	897	rs362525_C	0.689155	0.648512
6	rs12528017	0	29652530	C	A	898	rs12528017_C	0.520035	0.710043
6	rs3117073	0	29652804	G	A	899	rs3117073_G	0.529685	0.649031
6	rs362522	0	29653187	A	G	900	rs362522_A	0.911286	0.834386
6	rs1233397	0	29653694	G	A	901	rs1233397_G	0.438009	0.393431
6	rs1233396	0	29654778	A	G	902	rs1233396_A	0.00677845	0.00538006
6	rs926552	0	29656068	A	G	903	rs926552_A	0.00623616	0.00497775
6	rs6936331	0	29656754	A	G	904	rs6936331_A	0.667966	0.671982
6	rs1233394	0	29657240	A	C	905	rs1233394_A	0.0914363	0.102562
6	rs12530421	0	29657422	C	A	906	rs12530421_C	0.577339	0.692104
6	rs1233391	0	29658597	G	A	907	rs1233391_G	0.348969	0.337014
6	rs1233390	0	29659840	A	G	908	rs1233390_A	0.120382	0.141887
6	rs1233389	0	29660462	A	C	909	rs1233389_A	0.17514	0.205485
6	rs1233388	0	29661706	G	A	910	rs1233388_G	0.402211	0.382487
6	rs362521	0	29664738	A	G	911	rs362521_A	0.594759	0.792185
6	rs1233386	0	29666169	A	G	912	rs1233386_A	0.121698	0.133553
6	rs362520	0	29666343	G	A	913	rs362520_G	0.957326	0.832801
6	rs1233384	0	29667274	A	G	914	rs1233384_A	0.121698	0.133553
6	rs6912589	0	29669829	A	G	915	rs6912589_A	0.822562	0.978736
6	rs17508548	0	29671046	C	A	916	rs17508548_C	0.358488	0.440005
6	rs9468559	0	29673266	C	A	917	rs9468559_C	0.553021	0.30409
6	rs3095273	0	29674348	A	G	918	rs3095273_A	0.605981	0.702212
6	rs3025646	0	29674821	G	A	919	rs3025646_G	0.582511	0.705782
6	rs362518	0	29675617	G	A	920	rs362518_G	0.315004	0.39031
6	rs362517	0	29677024	A	G	921	rs362517_A	0.557983	0.568107
6	rs3025643	0	29677934	A	G	922	rs3025643_A	0.539941	0.648137
6	rs3025642	0	29678295	A	G	923	rs3025642_A	0.80885	0.845358
6	rs3025640	0	29678644	A	G	924	rs3025640_A	0.122233	0.108861
6	rs2267633	0	29678820	G	A	925	rs2267633_G	0.317968	0.392377
6	rs10946999	0	29679588	A	C	926	rs10946999_A	0.74776	0.727548
6	rs740884	0	29682610	A	G	927	rs740884_A	0.089306	0.0847062
6	rs29261	0	29684177	G	A	928	rs29261_G	0.315086	0.252819
6	rs29230	0	29684372	G	A	929	rs29230_G	0.759675	0.58821
6	rs29262	0	29684571	G	A	930	rs29262_G	0.320484	0.257602
6	rs29258	0	29685596	A	G	931	rs29258_A	0.315742	0.253318
6	rs29257	0	29686009	G	A	932	rs29257_G	0.320484	0.257602
6	rs29255	0	29687523	C	A	933	rs29255_C	0.515902	0.709953
6	rs29253	0	29688415	G	A	934	rs29253_G	0.350159	0.281912
6	rs29227	0	29688567	A	C	935	rs29227_A	0.317042	0.254405
6	rs29226	0	29688990	C	A	936	rs29226_C	0.373031	0.302082
6	rs2267634	0	29690191	C	G	937	rs2267634_C	0.849503	0.67371
6	rs3025632	0	29690279	A	G	938	rs3025632_A	0.0409361	0.0255481
6	rs16867690	0	29693362	A	G	939	rs16867690_A	0.310132	0.247243
6	rs6919973	0	29695853	A	G	940	rs6919973_A	0.367517	0.297361
6	rs29223	0	29696523	C	A	941	rs29223_C	0.327163	0.263305
6	rs29221	0	29697103	C	G	942	rs29221_C	0.861764	0.715021
6	rs29220	0	29697645	G	C	943	rs29220_G	0.691027	0.802295
6	rs3828923	0	29698694	A	G	944	rs3828923_A	0.29737	0.445194
6	rs6938734	0	29699038	A	G	945	rs6938734_A	0.822562	0.978736
6	rs2267635	0	29700410	G	A	946	rs2267635_G	0.488111	0.673541
6	rs715044	0	29701767	A	C	947	rs715044_A	0.469925	0.659787
6	rs2021749	0	29706098	A	G	948	rs2021749_A	0.399899	0.319187
6	rs29243	0	29707081	A	G	949	rs29243_A	0.14983	0.21966
6	rs29218	0	29715408	G	A	950	rs29218_G	0.00256229	0.00670798
6	rs29240	0	29715455	G	A	951	rs29240_G	0.0378853	0.0190267
6	rs3025623	0	29715726	A	G	952	rs3025623_A	0.0378853	0.0190267
6	rs1233374	0	29716673	G	A	953	rs1233374_G	0.304612	0.224002
6	rs29273	0	29718968	C	G	954	rs29273_C	0.477536	0.67179
6	rs29233	0	29719208	C	G	955	rs29233_C	0.997945	0.882612
6	rs29232	0	29719410	A	G	956	rs29232_A	0.133624	0.121253
6	rs3131854	0	29719864	A	G	957	rs3131854_A	0.746838	0.725308
6	rs16895214	0	29723772	C	A	958	rs16895214_C	0.315856	0.369221
6	rs3129073	0	29723801	G	A	959	rs3129073_G	0.0084145	0.0192779
6	rs439812	0	29724586	G	A	960	rs439812_G	0.660087	0.764334
6	rs29270	0	29725379	G	A	961	rs29270_G	0.202782	0.21272
6	rs29269	0	29725726	A	G	962	rs29269_A	0.476162	0.671485
6	rs6920297	0	29726011	A	G	963	rs6920297_A	0.141196	0.531759
6	rs29272	0	29726345	A	C	964	rs29272_A	0.259828	0.155474
6	rs29231	0	29726504	A	G	965	rs29231_A	0.618421	0.875404
6	rs29254	0	29731573	G	A	966	rs29254_G	0.945594	0.933695
6	rs29234	0	29732091	C	A	967	rs29234_C	0.28266	0.17315
6	rs3130250	0	29732980	A	G	968	rs3130250_A	0.258492	0.284239
6	rs2252711	0	29734300	G	A	969	rs2252711_G	0.551269	0.663401
6	rs9257932	0	29734355	G	A	970	rs9257932_G	0.204119	0.229682
6	rs3135050	0	29736416	A	G	971	rs3135050_A	0.457811	0.497072
6	rs2535260	0	29736862	C	G	972	rs2535260_C	0.859303	0.538961
6	rs3117286	0	29737753	G	A	973	rs3117286_G	0.420117	0.330707
6	rs2535255	0	29739669	A	G	974	rs2535255_A	0.554818	0.82355
6	rs3130252	0	29739723	G	A	975	rs3130252_G	0.430891	0.470431
6	rs2256266	0	29740297	A	G	976	rs2256266_A	0.587743	0.698944
6	rs6905408	0	29741754	A	G	977	rs6905408_A	0.125128	0.181342
6	rs2857766	0	29741982	G	C	978	rs2857766_G	0.498054	0.396725
6	rs3130253	0	29741991	A	G	979	rs3130253_A	0.845858	0.888449
6	rs2857767	0	29742247	C	G	980	rs2857767_C	0.451504	0.356819
6	rs2857770	0	29742695	A	G	981	rs2857770_A	0.389893	0.291311
6	rs17184514	0	29743389	C	A	982	rs17184514_C	0.869983	0.983402
6	rs926827	0	29743496	A	G	983	rs926827_A	0.702378	0.916482
6	rs2071653	0	29743907	A	G	984	rs2071653_A	0.851397	0.845476
6	rs9257936	0	29747755	A	G	985	rs9257936_A	0.868521	0.938059
6	rs2535241	0	29748764	A	T	986	rs2535241_A	0.706925	0.922123
6	rs2747419	0	29750173	A	C	987	rs2747419_A	0.614116	0.888858
6	rs375984	0	29752481	A	G	988	rs375984_A	0.107695	0.142701
6	rs2535238	0	29753017	A	C	989	rs2535238_A	0.115327	0.151625
6	rs2747421	0	29753097	G	C	990	rs2747421_G	0.0998635	0.13326
6	rs387603	0	29753557	A	C	991	rs387603_A	0.614116	0.888858
6	rs396660	0	29754144	A	G	992	rs396660_A	0.495622	0.77407
6	rs445150	0	29754858	G	A	993	rs445150_G	0.495622	0.77407
6	rs3870968	0	29755128	A	C	994	rs3870968_A	0.990773	0.893519
6	rs3129054	0	29757035	A	G	995	rs3129054_A	0.616102	0.578687
6	rs9500954	0	29757154	G	A	996	rs9500954_G	0.0306956	0.0536394
6	rs3129051	0	29758101	A	T	997	rs3129051_A	0.636797	0.911704
6	rs423281	0	29759511	A	G	998	rs423281_A	0.629533	0.905487
6	rs385743	0	29759642	A	G	999	rs385743_A	0.546765	0.814057
6	rs2535236	0	29759664	A	G	1000	rs2535236_A	0.502684	0.464212
6	rs2747437	0	29760135	A	C	1001	rs2747437_A	0.614116	0.888858
6	rs3117292	0	29760178	G	A	1002	rs3117292_G	0.410893	0.394822
6	rs3129045	0	29760555	A	C	1003	rs3129045_A	0.434848	0.46649
6	rs2747442	0	29761165	G	A	1004	rs2747442_G	0.506743	0.471126
6	rs2747444	0	29761271	C	A	1005	rs2747444_C	0.614116	0.888858
6	rs3117294	0	29761308	C	A	1006	rs3117294_C	0.424039	0.454964
6	rs3117299	0	29761936	C	A	1007	rs3117299_C	0.158707	0.248584
6	rs3095286	0	29761943	A	G	1008	rs3095286_A	0.572904	0.536529
6	rs3117301	0	29762679	A	G	1009	rs3117301_A	0.171259	0.217022
6	rs2747453	0	29762922	G	A	1010	rs2747453_G	0.90758	0.876393
6	rs2747454	0	29763092	A	G	1011	rs2747454_A	0.844602	0.656477
6	rs2747457	0	29764396	C	A	1012	rs2747457_C	0.171805	0.217537
6	rs2894113	0	29769435	A	T	1013	rs2894113_A	0.584609	0.704981
6	rs3094736	0	29770353	A	T	1014	rs3094736_A	0.602441	0.731868
6	rs3129029	0	29770422	C	A	1015	rs3129029_C	0.812944	0.77766
6	rs3131888	0	29771868	G	A	1016	rs3131888_G	0.0878961	0.08069
6	rs3129090	0	29772110	A	G	1017	rs3129090_A	0.983951	0.807337
6	rs3131886	0	29772431	G	A	1018	rs3131886_G	0.339529	0.395122
6	rs3131875	0	29774090	A	G	1019	rs3131875_A	0.924476	0.954756
6	rs3116803	0	29775851	G	A	1020	rs3116803_G	0.586154	0.820817
6	rs3116802	0	29775869	G	A	1021	rs3116802_G	0.624687	0.86837
6	rs3129070	0	29776055	A	G	1022	rs3129070_A	0.640896	0.887323
6	rs9258102	0	29776892	G	A	1023	rs9258102_G	0.449421	0.311701
6	rs3116799	0	29776986	C	A	1024	rs3116799_C	0.537075	0.871216
6	rs6911622	0	29777730	A	G	1025	rs6911622_A	0.494041	0.5061
6	rs2107203	0	29777809	A	G	1026	rs2107203_A	0.610318	0.854616
6	rs6456993	0	29778515	A	G	1027	rs6456993_A	0.471216	0.334892
6	rs9258117	0	29779074	A	G	1028	rs9258117_A	0.913895	0.666205
6	rs9258122	0	29779719	A	G	1029	rs9258122_A	0.63609	0.88168
6	rs3131865	0	29780144	G	C	1030	rs3131865_G	0.414468	0.635994
6	rs3131863	0	29781462	G	A	1031	rs3131863_G	0.803237	0.885858
6	rs11962017	0	29781979	A	G	1032	rs11962017_A	0.514526	0.527301
6	rs12663603	0	29782408	G	A	1033	rs12663603_G	0.0221039	0.00442438
6	rs1476573	0	29782627	A	G	1034	rs1476573_A	0.810147	0.893742
6	rs1476572	0	29782720	C	A	1035	rs1476572_C	0.801455	0.884634
6	rs7762253	0	29784802	A	G	1036	rs7762253_A	0.444851	0.779935
6	rs3871467	0	29785228	A	G	1037	rs3871467_A	0.465777	0.730251
6	rs1610742	0	29785931	G	A	1038	rs1610742_G	0.506173	0.834302
6	rs1610594	0	29787026	G	A	1039	rs1610594_G	0.70747	0.783167
6	rs7741807	0	29788636	C	G	1040	rs7741807_C	0.330708	0.381825
6	rs1610597	0	29789679	A	G	1041	rs1610597_A	0.658883	0.664297
6	rs1632964	0	29790218	A	G	1042	rs1632964_A	0.46356	0.778292
6	rs2524272	0	29790379	G	A	1043	rs2524272_G	0.70747	0.783167
6	rs1627567	0	29790845	A	T	1044	rs1627567_A	0.704966	0.780613
6	rs2735062	0	29790868	G	A	1045	rs2735062_G	0.396314	0.637493
6	rs1632962	0	29791787	A	G	1046	rs1632962_A	0.450474	0.764311
6	rs2517912	0	29791923	A	G	1047	rs2517912_A	0.39732	0.639639
6	rs2517911	0	29792613	G	A	1048	rs2517911_G	0.330314	0.534819
6	rs7759272	0	29792973	G	A	1049	rs7759272_G	0.403503	0.375799
6	rs3757324	0	29797106	A	C	1050	rs3757324_A	0.398385	0.373109
6	rs3998799	0	29798673	G	C	1051	rs3998799_G	0.765583	0.938863
6	rs1362126	0	29798998	A	G	1052	rs1362126_A	0.713474	0.879038
6	rs1736926	0	29800541	A	G	1053	rs1736926_A	0.32211	0.282218
6	rs2076177	0	29801092	A	G	1054	rs2076177_A	0.394016	0.364612
6	rs2235383	0	29801478	G	A	1055	rs2235383_G	0.395344	0.367839
6	rs1736922	0	29801948	A	G	1056	rs1736922_A	0.355487	0.554109
6	rs3734814	0	29802659	C	A	1057	rs3734814_C	0.416304	0.397677
6	rs1628578	0	29803481	C	A	1058	rs1628578_C	0.356698	0.556393
6	rs9258187	0	29803579	C	A	1059	rs9258187_C	0.395344	0.367839
6	rs2272874	0	29804224	G	A	1060	rs2272874_G	0.395344	0.367839
6	rs1611350	0	29806800	G	A	1061	rs1611350_G	0.28735	0.291084
6	rs3909134	0	29807232	G	A	1062	rs3909134_G	0.0601747	0.0118695
6	rs6910733	0	29807364	G	A	1063	rs6910733_G	0.145634	0.151687
6	rs2743922	0	29807692	A	C	1064	rs2743922_A	0.996689	0.840208
6	rs2523400	0	29807763	G	A	1065	rs2523400_G	0.116189	0.121762
6	rs2523399	0	29808058	G	A	1066	rs2523399_G	0.11406	0.119551
6	rs1610601	0	29808162	A	C	1067	rs1610601_A	0.0718618	0.0901764
6	rs2735054	0	29808594	G	A	1068	rs2735054_G	0.116464	0.122102
6	rs2735052	0	29809543	A	G	1069	rs2735052_A	0.554075	0.565598
6	rs7755571	0	29809922	G	A	1070	rs7755571_G	0.156325	0.162207
6	rs1610602	0	29810040	A	C	1071	rs1610602_A	0.40076	0.445119
6	rs2844833	0	29810185	C	G	1072	rs2844833_C	0.987314	0.876915
6	rs2523395	0	29810489	A	G	1073	rs2523395_A	0.569038	0.572544
6	rs2394159	0	29810658	G	A	1074	rs2394159_G	0.967269	0.866678
6	rs2394160	0	29811241	G	A	1075	rs2394160_G	0.536565	0.548198
6	rs1736915	0	29812295	A	G	1076	rs1736915_A	0.398274	0.442503
6	rs1736913	0	29812379	A	G	1077	rs1736913_A	0.384196	0.430451
6	rs9258208	0	29812524	A	G	1078	rs9258208_A	0.168718	0.174973
6	rs7751815	0	29813063	A	G	1079	rs7751815_A	0.145634	0.151687
6	rs2523393	0	29813638	G	A	1080	rs2523393_G	0.547146	0.559648
6	rs2735051	0	29813667	A	G	1081	rs2735051_A	0.967237	0.866577
6	rs1736911	0	29813751	A	G	1082	rs1736911_A	0.185674	0.220462
6	rs9258213	0	29814670	G	A	1083	rs9258213_G	0.0245411	0.0413371
6	rs929160	0	29814772	T	A	1084	rs929160_T	0.394772	0.437777
6	rs1633096	0	29815246	A	C	1085	rs1633096_A	0.111157	0.130728
6	rs2523388	0	29815683	A	G	1086	rs2523388_A	0.535694	0.546959
6	rs9258218	0	29816007	A	G	1087	rs9258218_A	0.156878	0.163405
6	rs1610603	0	29816201	A	G	1088	rs1610603_A	0.259669	0.243542
6	rs2743951	0	29817213	A	G	1089	rs2743951_A	0.585891	0.59341
6	rs2517938	0	29817819	G	A	1090	rs2517938_G	0.898267	0.814179
6	rs730858	0	29818607	A	G	1091	rs730858_A	0.683118	0.583165
6	rs4713240	0	29818705	G	A	1092	rs4713240_G	0.75854	0.852373
6	rs1610613	0	29818942	A	G	1093	rs1610613_A	0.267871	0.250493
6	rs9258220	0	29819020	A	G	1094	rs9258220_A	0.0270701	0.0453068
6	rs2523386	0	29819726	A	G	1095	rs2523386_A	0.938168	0.997324
6	rs2844846	0	29820015	A	T	1096	rs2844846_A	0.997799	0.838635
6	rs9258224	0	29820235	A	G	1097	rs9258224_A	0.329817	0.325854
6	rs2844845	0	29820738	A	T	1098	rs2844845_A	0.867106	0.768654
6	rs2072894	0	29821015	A	G	1099	rs2072894_A	0.404667	0.40233
6	rs1737087	0	29821747	A	G	1100	rs1737087_A	0.22855	0.213142
6	rs1737086	0	29822392	A	C	1101	rs1737086_A	0.404702	0.382712
6	rs6901686	0	29823700	A	G	1102	rs6901686_A	0.37937	0.375733
6	rs1633086	0	29823741	A	G	1103	rs1633086_A	0.526263	0.487503
6	rs1633085	0	29823976	A	G	1104	rs1633085_A	0.618589	0.532287
6	rs1737084	0	29825318	A	T	1105	rs1737084_A	0.272589	0.255686
6	rs733841	0	29825959	A	G	1106	rs733841_A	0.278153	0.259668
6	rs1610735	0	29826498	C	A	1107	rs1610735_C	0.94747	0.98219
6	rs4713243	0	29828940	G	C	1108	rs4713243_G	0.180749	0.149709
6	rs2394164	0	29829376	G	C	1109	rs2394164_G	0.257111	0.213415
6	rs9258253	0	29829511	C	A	1110	rs9258253_C	0.428088	0.478642
6	rs9391630	0	29830494	G	A	1111	rs9391630_G	0.540521	0.641474
6	rs9258260	0	29831140	A	G	1112	rs9258260_A	0.605309	0.605726
6	rs1633070	0	29832126	A	G	1113	rs1633070_A	0.290388	0.271807
6	rs1737079	0	29832724	G	A	1114	rs1737079_G	0.295405	0.27672
6	rs1737078	0	29832918	A	C	1115	rs1737078_A	0.494193	0.453418
6	rs1737076	0	29833300	G	A	1116	rs1737076_G	0.577554	0.53498
6	rs9258266	0	29833431	A	G	1117	rs9258266_A	0.499286	0.62238
6	rs1633063	0	29834025	A	G	1118	rs1633063_A	0.0974009	0.125968
6	rs6935107	0	29834148	A	G	1119	rs6935107_A	0.0109195	0.0154885
6	rs1633059	0	29834529	G	A	1120	rs1633059_G	0.637608	0.64413
6	rs1610628	0	29836188	C	A	1121	rs1610628_C	0.290914	0.272343
6	rs9500976	0	29838369	G	A	1122	rs9500976_G	0.244091	0.166992
6	rs9258275	0	29838483	G	A	1123	rs9258275_G	0.181966	0.151258
6	rs1737070	0	29838525	C	A	1124	rs1737070_C	0.287614	0.263307
6	rs1737069	0	29838709	A	G	1125	rs1737069_A	0.521743	0.493337
6	rs1737064	0	29839242	C	A	1126	rs1737064_C	0.272842	0.254516
6	rs7759474	0	29839614	A	G	1127	rs7759474_A	0.562242	0.628522
6	rs1611285	0	29839766	G	A	1128	rs1611285_G	0.481284	0.394931
6	rs1626392	0	29840223	A	G	1129	rs1626392_A	0.702813	0.8502
6	rs1625636	0	29840281	A	G	1130	rs1625636_A	0.250521	0.233313
6	rs1633043	0	29840373	A	G	1131	rs1633043_A	0.174951	0.1986
6	rs422343	0	29840409	A	G	1132	rs422343_A	0.905991	0.812661
6	rs1737060	0	29840948	G	C	1133	rs1737060_G	0.203775	0.20611
6	rs1633041	0	29841202	A	G	1134	rs1633041_A	0.0819245	0.0696609
6	rs2735048	0	29841680	A	G	1135	rs2735048_A	0.0546672	0.0760661
6	rs2735046	0	29842077	A	G	1136	rs2735046_A	0.0600278	0.0510265
6	rs12660712	0	29842613	A	C	1137	rs12660712_A	0.303666	0.128997
6	rs1737049	0	29843083	G	A	1138	rs1737049_G	0.120339	0.087345
6	rs9258294	0	29843638	A	G	1139	rs9258294_A	0.249873	0.142394
6	rs1737043	0	29844026	A	G	1140	rs1737043_A	0.686751	0.757312
6	rs1737041	0	29844208	A	C	1141	rs1737041_A	0.0756204	0.0640585
6	rs11753872	0	29844921	A	C	1142	rs11753872_A	0.764379	0.980961
6	rs6932033	0	29845825	G	A	1143	rs6932033_G	0.834981	0.943683
6	rs1610634	0	29846433	G	A	1144	rs1610634_G	0.198365	0.196171
6	rs1610726	0	29846644	G	C	1145	rs1610726_G	0.111182	0.0795216
6	rs885940	0	29847036	A	G	1146	rs885940_A	0.0902899	0.0768816
6	rs9258302	0	29849317	G	A	1147	rs9258302_G	0.2609	0.306584
6	rs1362068	0	29850087	G	A	1148	rs1362068_G	0.165126	0.165808
6	rs1362070	0	29850278	G	A	1149	rs1362070_G	0.166499	0.167214
6	rs1633036	0	29850788	G	A	1150	rs1633036_G	0.142551	0.181633
6	rs9258304	0	29851414	G	A	1151	rs9258304_G	0.393003	0.452078
6	rs1633034	0	29851542	G	A	1152	rs1633034_G	0.0678609	0.0433865
6	rs1633030	0	29853773	G	A	1153	rs1633030_G	0.10869	0.0778119
6	rs1614309	0	29853863	A	G	1154	rs1614309_A	0.0864611	0.0558619
6	rs1633021	0	29854848	G	A	1155	rs1633021_G	0.205751	0.238518
6	rs2735042	0	29855352	G	A	1156	rs2735042_G	0.106556	0.0758538
6	rs9258384	0	29861847	A	C	1157	rs9258384_A	0.447883	0.323581
6	rs2743941	0	29863430	A	G	1158	rs2743941_A	0.25223	0.294784
6	rs1737008	0	29866096	A	G	1159	rs1737008_A	0.284342	0.350766
6	rs1633012	0	29866705	G	C	1160	rs1633012_G	0.198589	0.242758
6	rs1611205	0	29867802	G	A	1161	rs1611205_G	0.23436	0.24132
6	rs1737004	0	29869190	G	C	1162	rs1737004_G	0.261147	0.267091
6	rs1610647	0	29870047	G	A	1163	rs1610647_G	0.165167	0.165843
6	rs16895757	0	29870157	A	G	1164	rs16895757_A	0.976049	0.871187
6	rs1633010	0	29870921	T	A	1165	rs1633010_T	0.0670297	0.0429061
6	rs2523415	0	29871978	A	G	1166	rs2523415_A	0.00737594	0.0109978
6	rs11758087	0	29872422	A	G	1167	rs11758087_A	0.817335	0.959455
6	rs1633005	0	29872451	A	G	1168	rs1633005_A	0.00177901	0.00293161
6	rs11751282	0	29872686	C	A	1169	rs11751282_C	0.819339	0.957883
6	rs2523414	0	29873066	G	A	1170	rs2523414_G	0.0359936	0.0563455
6	rs1629068	0	29873270	G	A	1171	rs1629068_G	0.0984386	0.0847914
6	rs1736991	0	29874905	C	G	1172	rs1736991_C	0.0616781	0.0392611
6	rs9258437	0	29875590	A	G	1173	rs9258437_A	0.828419	0.61508
6	rs3873243	0	29875604	A	C	1174	rs3873243_A	0.826275	0.917922
6	rs7741100	0	29876102	A	C	1175	rs7741100_A	0.256988	0.148444
6	rs11751333	0	29876116	A	G	1176	rs11751333_A	0.868114	0.880008
6	rs2517922	0	29876280	C	A	1177	rs2517922_C	0.00579685	0.0086691
6	rs1611185	0	29876323	G	A	1178	rs1611185_G	0.0713516	0.0779332
6	rs2017525	0	29876482	A	G	1179	rs2017525_A	0.761113	0.711691
6	rs885937	0	29877042	T	A	1180	rs885937_T	0.169172	0.170521
6	rs3891160	0	29877126	G	C	1181	rs3891160_G	0.494107	0.30668
6	rs9468626	0	29877225	A	G	1182	rs9468626_A	0.30163	0.125431
6	rs1632996	0	29877486	T	A	1183	rs1632996_T	0.175914	0.176169
6	rs1736982	0	29877500	A	G	1184	rs1736982_A	0.585657	0.671875
6	rs4281004	0	29877536	G	A	1185	rs4281004_G	0.705375	0.922954
6	rs1632995	0	29877600	T	A	1186	rs1632995_T	0.166954	0.167648
6	rs1736981	0	29878301	A	G	1187	rs1736981_A	0.585657	0.671875
6	rs1632988	0	29880374	A	G	1188	rs1632988_A	0.11816	0.116901
6	rs1632987	0	29880528	G	C	1189	rs1632987_G	0.0921747	0.0782179
6	rs2394173	0	29881137	A	G	1190	rs2394173_A	1	1
6	rs1632984	0	29881371	A	T	1191	rs1632984_A	0.376428	0.465634
6	rs1632983	0	29881488	A	G	1192	rs1632983_A	0.0657359	0.0420313
6	rs9258447	0	29881831	A	G	1193	rs9258447_A	0.83867	0.930799
6	rs1736976	0	29881978	G	A	1194	rs1736976_G	0.205048	0.210406
6	rs11751820	0	29882166	A	G	1195	rs11751820_A	0.52131	0.328313
6	rs11757182	0	29883504	C	A	1196	rs11757182_C	0.834981	0.943683
6	rs2523409	0	29883641	G	A	1197	rs2523409_G	0.0912163	0.118086
6	rs1736971	0	29884301	A	C	1198	rs1736971_A	0.0863757	0.073366
6	rs1736969	0	29884369	A	T	1199	rs1736969_A	0.0877865	0.0746263
6	rs4098859	0	29885178	G	A	1200	rs4098859_G	0.835739	0.942777
6	rs1632971	0	29885890	A	G	1201	rs1632971_A	0.362442	0.451217
6	rs9357086	0	29886008	C	G	1202	rs9357086_C	0.170369	0.233515
6	rs2523408	0	29886088	C	A	1203	rs2523408_C	0.219707	0.268758
6	rs9295820	0	29886480	C	G	1204	rs9295820_C	0.398044	0.367131
6	rs1610663	0	29886605	A	G	1205	rs1610663_A	0.219621	0.268485
6	rs1610699	0	29886966	C	A	1206	rs1610699_C	0.240374	0.297216
6	rs1610669	0	29888072	A	T	1207	rs1610669_A	0.1596	0.158578
6	rs1610707	0	29890027	A	C	1208	rs1610707_A	0.114778	0.0853618
6	rs11753629	0	29890310	A	G	1209	rs11753629_A	0.916363	0.839917
6	rs1736959	0	29890449	A	G	1210	rs1736959_A	0.0699262	0.0655142
6	rs1633105	0	29891361	G	A	1211	rs1633105_G	0.160893	0.157494
6	rs1619379	0	29893214	A	G	1212	rs1619379_A	0.280851	0.333937
6	rs2735028	0	29893517	A	G	1213	rs2735028_A	0.231956	0.26302
6	rs1736951	0	29893755	A	G	1214	rs1736951_A	0.22054	0.249818
6	rs2743933	0	29894199	G	A	1215	rs2743933_G	0.702837	0.829784
6	rs2743931	0	29895051	G	A	1216	rs2743931_G	0.356476	0.446191
6	rs2394177	0	29895348	G	A	1217	rs2394177_G	0.947991	0.783049
6	rs3873245	0	29896516	A	G	1218	rs3873245_A	0.877129	0.816932
6	rs1610677	0	29897150	G	A	1219	rs1610677_G	0.219594	0.15892
6	rs1611149	0	29897978	A	G	1220	rs1611149_A	0.271594	0.269587
6	rs1632949	0	29901703	G	A	1221	rs1632949_G	0.213634	0.190785
6	rs1632948	0	29902028	G	A	1222	rs1632948_G	0.271233	0.268591
6	rs1736936	0	29902296	A	G	1223	rs1736936_A	0.206236	0.156117
6	rs1736935	0	29902422	G	A	1224	rs1736935_G	0.265941	0.26395
6	rs3115630	0	29902480	A	G	1225	rs3115630_A	0.678193	0.719796
6	rs1632942	0	29904619	G	A	1226	rs1632942_G	0.288966	0.285548
6	rs1632933	0	29905912	A	G	1227	rs1632933_A	0.22696	0.16441
6	rs1233330	0	29907082	A	G	1228	rs1233330_A	0.345981	0.432326
6	rs1610682	0	29909303	G	A	1229	rs1610682_G	0.00088354	0.00079546
6	rs2517892	0	29909453	G	A	1230	rs2517892_G	0.118916	0.109828
6	rs2735020	0	29910964	A	C	1231	rs2735020_A	0.0226558	0.026732
6	rs2523790	0	29911629	C	A	1232	rs2523790_C	0.106733	0.0957872
6	rs16896049	0	29911709	C	G	1233	rs16896049_C	0.911342	0.978316
6	rs2735018	0	29912388	C	G	1234	rs2735018_C	0.0229229	0.0306809
6	rs2394180	0	29913178	G	A	1235	rs2394180_G	0.841864	0.797501
6	rs2735014	0	29913788	A	C	1236	rs2735014_A	0.0801764	0.0852314
6	rs7755504	0	29914012	C	G	1237	rs7755504_C	0.962033	0.728521
6	rs2517887	0	29915372	G	C	1238	rs2517887_G	0.071465	0.075849
6	rs2735005	0	29916443	A	G	1239	rs2735005_A	0.849823	0.827992
6	rs2735003	0	29916613	C	A	1240	rs2735003_C	0.11472	0.11926
6	rs2523776	0	29917173	C	A	1241	rs2523776_C	0.0228082	0.0299296
6	rs4959033	0	29917283	C	A	1242	rs4959033_C	0.724755	0.917434
6	rs1611133	0	29917361	A	G	1243	rs1611133_A	0.00129653	0.00117987
6	rs3900925	0	29917935	A	G	1244	rs3900925_A	0.837838	0.947909
6	rs4607472	0	29918522	G	A	1245	rs4607472_G	0.779365	0.964327
6	rs2844827	0	29919216	G	A	1246	rs2844827_G	0.0888183	0.116143
6	rs4084096	0	29919847	A	C	1247	rs4084096_A	0.894475	0.952149
6	rs2734994	0	29920009	A	G	1248	rs2734994_A	0.0237531	0.0279064
6	rs2734990	0	29920484	A	T	1249	rs2734990_A	0.0880718	0.115245
6	rs2523767	0	29920786	G	A	1250	rs2523767_G	0.0880718	0.115245
6	rs9258557	0	29921921	A	G	1251	rs9258557_A	0.0237531	0.0279064
6	rs4081563	0	29922343	G	A	1252	rs4081563_G	0.911342	0.978316
6	rs3115629	0	29923692	G	A	1253	rs3115629_G	0.408736	0.493626
6	rs2394186	0	29924400	G	A	1254	rs2394186_G	0.914957	0.744563
6	rs2523765	0	29925085	A	T	1255	rs2523765_A	0.000722764	0.00181312
6	rs9380146	0	29925223	A	G	1256	rs9380146_A	0.134881	0.19018
6	rs11759549	0	29925902	C	G	1257	rs11759549_C	0.98022	0.708446
6	rs2734986	0	29926547	G	A	1258	rs2734986_G	0.00627523	0.0143372
6	rs2734985	0	29926641	G	A	1259	rs2734985_G	0.0123987	0.0280318
6	rs2517868	0	29927317	A	C	1260	rs2517868_A	0.0244816	0.0548037
6	rs2508050	0	29928026	G	A	1261	rs2508050_G	0.568421	0.349727
6	rs3115627	0	29928257	G	A	1262	rs3115627_G	0.0628523	0.084431
6	rs5013093	0	29928565	A	G	1263	rs5013093_A	0.0145052	0.0301623
6	rs2523756	0	29928696	G	A	1264	rs2523756_G	0.429036	0.421924
6	rs2734984	0	29928810	G	A	1265	rs2734984_G	0.0147372	0.0305014
6	rs9258631	0	29929272	C	A	1266	rs9258631_C	0.202605	0.358455
6	rs2734982	0	29929546	A	C	1267	rs2734982_A	0.0699453	0.0853695
6	rs2734980	0	29929875	A	G	1268	rs2734980_A	0.0145612	0.0303524
6	rs2517862	0	29929916	A	G	1269	rs2517862_A	0.00757083	0.0155939
6	rs2517861	0	29929961	A	G	1270	rs2517861_A	0.0111626	0.024332
6	rs2975033	0	29930240	A	G	1271	rs2975033_A	0.0805733	0.0975427
6	rs9258651	0	29930334	A	G	1272	rs9258651_A	0.431366	0.423899
6	rs3094175	0	29930902	T	A	1273	rs3094175_T	0.44785	0.439861
6	rs2428510	0	29931006	A	G	1274	rs2428510_A	0.442983	0.435312
6	rs3128909	0	29931550	A	T	1275	rs3128909_A	0.172719	0.156691
6	rs3132726	0	29931585	A	G	1276	rs3132726_A	0.227835	0.298069
6	rs6919513	0	29931973	A	G	1277	rs6919513_A	0.431366	0.423899
6	rs9258679	0	29932038	G	A	1278	rs9258679_G	0.431601	0.424372
6	rs2517840	0	29934071	A	G	1279	rs2517840_A	0.0752747	0.0916524
6	rs1611697	0	29935364	C	A	1280	rs1611697_C	0.55542	0.538085
6	rs9258739	0	29935642	A	G	1281	rs9258739_A	0.202672	0.289175
6	rs1611699	0	29935732	T	A	1282	rs1611699_T	0.4182	0.411053
6	rs9258740	0	29935878	A	G	1283	rs9258740_A	0.141521	0.224122
6	rs3094657	0	29936289	G	C	1284	rs3094657_G	0.199516	0.263111
6	rs2523822	0	29936639	G	A	1285	rs2523822_G	0.074755	0.0910695
6	rs1611710	0	29936895	A	G	1286	rs1611710_A	0.4198	0.413275
6	rs1611715	0	29937461	C	A	1287	rs1611715_C	0.0587837	0.0808016
6	rs1611717	0	29937556	G	A	1288	rs1611717_G	0.454318	0.44737
6	rs9258762	0	29937634	A	G	1289	rs9258762_A	0.704735	0.659874
6	rs3094169	0	29937965	A	G	1290	rs3094169_A	0.172719	0.156691
6	rs7760172	0	29938053	G	A	1291	rs7760172_G	0.827002	0.495946
6	rs9258766	0	29938390	A	G	1292	rs9258766_A	0.213563	0.303499
6	rs9258771	0	29938631	G	A	1293	rs9258771_G	0.209515	0.298616
6	rs1611732	0	29938987	A	G	1294	rs1611732_A	0.431601	0.424372
6	rs765649	0	29939037	A	T	1295	rs765649_A	0.410567	0.403837
6	rs1611737	0	29939550	G	C	1296	rs1611737_G	0.436708	0.429484
6	rs2524035	0	29940311	A	G	1297	rs2524035_A	0.486094	0.736816
6	rs7760545	0	29941451	A	C	1298	rs7760545_A	0.0350501	0.0432672
6	rs3094165	0	29941520	A	G	1299	rs3094165_A	0.602241	0.737445
6	rs2734974	0	29941758	G	A	1300	rs2734974_G	0.0941968	0.0855836
6	rs2734973	0	29941927	A	G	1301	rs2734973_A	0.834984	0.631555
6	rs2734971	0	29942428	A	G	1302	rs2734971_A	0.231155	0.17335
6	rs3094161	0	29943052	A	G	1303	rs3094161_A	0.952551	0.788849
6	rs3132721	0	29943612	G	A	1304	rs3132721_G	0.662398	0.917352
6	rs3094159	0	29943813	G	A	1305	rs3094159_G	0.911124	0.831566
6	rs1611635	0	29944442	A	G	1306	rs1611635_A	0.0059337	0.0139707
6	rs9258866	0	29944503	A	C	1307	rs9258866_A	0.314279	0.181249
6	rs3132718	0	29944556	A	G	1308	rs3132718_A	0.904775	0.836521
6	rs1611636	0	29944682	C	A	1309	rs1611636_C	0.710205	0.827358
6	rs9258881	0	29945121	G	A	1310	rs9258881_G	0.903416	0.837926
6	rs886398	0	29947247	A	G	1311	rs886398_A	0.524165	0.307161
6	rs3132714	0	29948627	A	G	1312	rs3132714_A	0.907601	0.833815
6	rs3128888	0	29949335	C	G	1313	rs3128888_C	0.361754	0.442241
6	rs3132708	0	29949615	A	G	1314	rs3132708_A	0.344381	0.513924
6	rs2523809	0	29957598	A	C	1315	rs2523809_A	0.827488	0.624757
6	rs2734959	0	29957666	G	C	1316	rs2734959_G	0.841772	0.950888
6	rs2523807	0	29958253	G	A	1317	rs2523807_G	0.467674	0.275339
6	rs9259852	0	30004400	G	A	1318	rs9259852_G	0.705308	0.667456
6	rs2524005	0	30007656	A	G	1319	rs2524005_A	0.0208611	0.0727405
6	rs2734905	0	30012908	C	A	1320	rs2734905_C	0.0124556	0.024099
6	rs2860580	0	30014670	A	G	1321	rs2860580_A	0.0458305	0.0674786
6	rs3094141	0	30017786	A	C	1322	rs3094141_A	0.336747	0.414873
6	rs3823339	0	30020947	C	G	1323	rs3823339_C	0.327054	0.190153
6	rs2499	0	30021521	A	C	1324	rs2499_A	0.359127	0.444167
6	rs6921314	0	30022199	A	G	1325	rs6921314_A	0.707167	0.507723
6	rs376646	0	30022356	A	G	1326	rs376646_A	0.00659795	0.0151003
6	rs2735097	0	30023280	A	C	1327	rs2735097_A	0.0174085	0.0346962
6	rs1632882	0	30024347	A	C	1328	rs1632882_A	0.00666357	0.0178818
6	rs417162	0	30024484	G	A	1329	rs417162_G	0.0038351	0.009914
6	rs1655906	0	30026233	A	T	1330	rs1655906_A	0.482735	0.565447
6	rs2508037	0	30026415	A	G	1331	rs2508037_A	0.00415838	0.0105847
6	rs9260461	0	30027808	A	G	1332	rs9260461_A	0.802651	0.75164
6	rs9260491	0	30028368	A	G	1333	rs9260491_A	0.785769	0.824923
6	rs1632874	0	30030102	C	A	1334	rs1632874_C	0.294669	0.368433
6	rs9260570	0	30030117	A	G	1335	rs9260570_A	0.571473	0.612085
6	rs16896742	0	30030719	G	A	1336	rs16896742_G	0.0122223	0.0148521
6	rs3893538	0	30032404	G	A	1337	rs3893538_G	0.0708286	0.106249
6	rs892666	0	30032707	A	G	1338	rs892666_A	0.736383	0.571176
6	rs12665039	0	30032758	G	A	1339	rs12665039_G	0.0710985	0.0154414
6	rs2523942	0	30033065	C	A	1340	rs2523942_C	0.442885	0.489769
6	rs2517701	0	30033951	A	T	1341	rs2517701_A	0.0149778	0.0318091
6	rs2523937	0	30035200	C	G	1342	rs2523937_C	0.311752	0.393445
6	rs2571400	0	30035701	G	C	1343	rs2571400_G	0.500675	0.535584
6	rs9260705	0	30037170	A	G	1344	rs9260705_A	0.830184	0.737195
6	rs2517689	0	30037232	A	G	1345	rs2517689_A	0.024617	0.0554442
6	rs7739434	0	30038598	G	A	1346	rs7739434_G	0.871846	0.960803
6	rs2571402	0	30040359	T	A	1347	rs2571402_T	0.00715444	0.0113354
6	rs9260734	0	30040645	A	G	1348	rs9260734_A	0.49978	0.64217
6	rs3903160	0	30040876	A	G	1349	rs3903160_A	0.10155	0.131824
6	rs3873283	0	30040979	G	A	1350	rs3873283_G	0.464484	0.605536
6	rs6457109	0	30041240	G	A	1351	rs6457109_G	0.959525	0.971984
6	rs2844806	0	30041418	G	A	1352	rs2844806_G	0.172731	0.137226
6	rs6457110	0	30041860	T	A	1353	rs6457110_T	0.0930398	0.241502
6	rs6914699	0	30042001	G	A	1354	rs6914699_G	0.0960631	0.243726
6	rs3893259	0	30042433	A	G	1355	rs3893259_A	0.513129	0.620761
6	rs4713270	0	30042676	A	G	1356	rs4713270_A	0.149742	0.221089
6	rs3893464	0	30043229	A	G	1357	rs3893464_A	0.24332	0.437954
6	rs9260759	0	30043351	A	G	1358	rs9260759_A	0.624278	0.990928
6	rs4959036	0	30044114	C	A	1359	rs4959036_C	0.496932	0.601524
6	rs4959037	0	30044286	A	T	1360	rs4959037_A	0.156344	0.229937
6	rs12193110	0	30045083	A	G	1361	rs12193110_A	0.1554	0.228802
6	rs12193208	0	30045128	A	C	1362	rs12193208_A	0.16976	0.248348
6	rs2517673	0	30045221	A	G	1363	rs2517673_A	0.597543	0.441295
6	rs4713274	0	30045472	C	G	1364	rs4713274_C	0.0935988	0.121663
6	rs2256539	0	30045719	G	A	1365	rs2256539_G	0.961715	0.957752
6	rs2256543	0	30045812	A	G	1366	rs2256543_A	0.0563987	0.106462
6	rs3202637	0	30045875	G	A	1367	rs3202637_G	0.204767	0.213015
6	rs1061535	0	30045903	A	G	1368	rs1061535_A	0.217428	0.194911
6	rs6457116	0	30046004	A	G	1369	rs6457116_A	0.0382997	0.107972
6	rs2523971	0	30046237	A	C	1370	rs2523971_A	0.0962926	0.173794
6	rs12195260	0	30046434	A	G	1371	rs12195260_A	0.18894	0.271585
6	rs116810211	0	30046550	A	C	1372	rs116810211_A	0.10176	0.152734
6	rs114840911	0	30046637	G	A	1373	rs114840911_G	0.749209	0.73668
6	rs114690890	0	30046756	T	A	1374	rs114690890_T	0.0890085	0.0886089
6	rs2523969	0	30046756	T	A	1375	rs2523969_T	0.0880831	0.087707
6	rs115068286	0	30046832	A	C	1376	rs115068286_A	0.86399	0.853591
6	rs114009945	0	30046911	A	G	1377	rs114009945_A	0.86172	0.86036
6	rs2735079	0	30046911	A	G	1378	rs2735079_A	0.887375	0.875028
6	rs114622755	0	30047091	G	C	1379	rs114622755_G	0.755187	0.91112
6	rs116608358	0	30047273	A	G	1380	rs116608358_A	0.123519	0.183453
6	rs2523964	0	30047273	A	G	1381	rs2523964_A	0.126609	0.185045
6	rs115178329	0	30047462	A	T	1382	rs115178329_A	0.130082	0.189481
6	rs116119596	0	30047493	A	G	1383	rs116119596_A	0.81695	0.802003
6	rs114059410	0	30047523	A	G	1384	rs114059410_A	0.119687	0.177257
6	rs115385400	0	30047559	A	G	1385	rs115385400_A	0.103048	0.1054
6	rs2523961	0	30047559	A	G	1386	rs2523961_A	0.0890909	0.0923315
6	rs116761360	0	30047656	A	T	1387	rs116761360_A	0.484781	0.616504
6	rs114555025	0	30047831	A	G	1388	rs114555025_A	0.934009	0.928774
6	rs435766	0	30047831	A	G	1389	rs435766_A	0.873024	0.857651
6	rs116441341	0	30047957	A	C	1390	rs116441341_A	0.00478014	0.00850791
6	rs115836634	0	30047981	A	G	1391	rs115836634_A	0.759626	0.996132
6	rs115932477	0	30048239	G	A	1392	rs115932477_G	0.985821	0.949349
6	rs114499818	0	30048351	A	G	1393	rs114499818_A	0.177297	0.186155
6	rs2256902	0	30048351	A	G	1394	rs2256902_A	0.17578	0.184171
6	rs115810639	0	30048467	A	G	1395	rs115810639_A	0.490355	0.486679
6	rs5009448	0	30048467	A	G	1396	rs5009448_A	0.565593	0.548949
6	rs115500464	0	30048483	A	C	1397	rs115500464_A	0.343695	0.178508
6	rs114204022	0	30048658	A	G	1398	rs114204022_A	0.120957	0.169871
6	rs116535843	0	30048676	C	G	1399	rs116535843_C	0.404777	0.218517
6	rs115538144	0	30048729	C	A	1400	rs115538144_C	0.889507	0.88826
6	rs2256919	0	30048729	C	A	1401	rs2256919_C	0.95456	0.96145
6	rs115509554	0	30048793	A	G	1402	rs115509554_A	0.200576	0.278767
6	rs115592739	0	30048922	G	A	1403	rs115592739_G	0.175452	0.249295
6	rs116454582	0	30048990	A	G	1404	rs116454582_A	0.798488	0.900005
6	rs116354912	0	30049043	G	A	1405	rs116354912_G	0.649227	0.625678
6	rs114886428	0	30049163	A	G	1406	rs114886428_A	0.136821	0.200047
6	rs116159284	0	30049410	A	G	1407	rs116159284_A	0.103707	0.136198
6	rs9295825	0	30049410	A	G	1408	rs9295825_A	0.103096	0.132467
6	rs2523948	0	30049836	C	A	1409	rs2523948_C	0.832494	0.85133
6	rs112130743	0	30049852	A	C	1410	rs112130743_A	0.189426	0.164376
6	rs116097111	0	30049922	A	G	1411	rs116097111_A	0.0189515	0.0280953
6	rs2523946	0	30049922	A	G	1412	rs2523946_A	0.0213699	0.0313795
6	rs114764570	0	30050012	G	C	1413	rs114764570_G	0.151647	0.225451
6	rs3823355	0	30050062	A	G	1414	rs3823355_A	0.14718	0.220393
6	rs116653299	0	30050105	C	A	1415	rs116653299_C	0.0180471	0.0265603
6	rs2844804	0	30050105	C	A	1416	rs2844804_C	0.0236946	0.034412
6	rs114282430	0	30050170	A	C	1417	rs114282430_A	0.454516	0.54897
6	rs116436488	0	30050184	A	G	1418	rs116436488_A	0.159903	0.236234
6	rs116160663	0	30050821	A	C	1419	rs116160663_A	0.178752	0.25661
6	rs2232238	0	30050836	G	A	1420	rs2232238_G	0.162144	0.139338
6	rs114492165	0	30050845	G	A	1421	rs114492165_G	0.344308	0.211306
6	rs115066129	0	30050906	C	A	1422	rs115066129_C	0.475195	0.406213
6	rs2523943	0	30050906	C	A	1423	rs2523943_C	0.473838	0.405004
6	rs114605621	0	30050958	G	C	1424	rs114605621_G	0.344308	0.211306
6	rs400488	0	30051014	A	G	1425	rs400488_A	0.160732	0.138463
6	rs115895139	0	30051157	G	A	1426	rs115895139_G	0.164273	0.238486
6	rs114200354	0	30051248	A	G	1427	rs114200354_A	0.166194	0.140663
6	rs116836924	0	30051260	A	G	1428	rs116836924_A	0.194157	0.275479
6	rs114857993	0	30051317	A	G	1429	rs114857993_A	0.991168	0.876166
6	rs112672605	0	30051334	A	G	1430	rs112672605_A	0.363726	0.505863
6	rs2735076	0	30051469	A	G	1431	rs2735076_A	0.770589	0.78331
6	rs115638442	0	30051560	A	C	1432	rs115638442_A	0.342737	0.210102
6	rs114500036	0	30051635	A	C	1433	rs114500036_A	0.0754857	0.106338
6	rs2394251	0	30051667	G	C	1434	rs2394251_G	0.831652	0.758799
6	rs3823363	0	30051694	A	G	1435	rs3823363_A	0.225421	0.264771
6	rs2893999	0	30051811	G	A	1436	rs2893999_G	0.811498	0.914279
6	rs2245961	0	30051983	C	A	1437	rs2245961_C	0.777013	0.702341
6	rs3823374	0	30052127	A	C	1438	rs3823374_A	0.147786	0.221844
6	rs3823375	0	30052137	G	A	1439	rs3823375_G	0.109481	0.166518
6	rs114764471	0	30052163	A	G	1440	rs114764471_A	0.632162	0.828085
6	rs115652293	0	30052232	A	C	1441	rs115652293_A	0.153905	0.229878
6	rs114341347	0	30052293	A	G	1442	rs114341347_A	0.0504516	0.0955838
6	rs114076256	0	30053189	T	A	1443	rs114076256_T	0.370874	0.229642
6	rs3823382	0	30053189	T	A	1444	rs3823382_T	0.362667	0.226909
6	rs115400432	0	30053249	G	A	1445	rs115400432_G	0.139669	0.070874
6	rs2571375	0	30053249	G	A	1446	rs2571375_G	0.137178	0.0693341
6	rs114752578	0	30053347	G	A	1447	rs114752578_G	0.361178	0.224905
6	rs3823384	0	30053347	G	A	1448	rs3823384_G	0.361178	0.224905
6	rs115313850	0	30053363	G	C	1449	rs115313850_G	0.134686	0.14861
6	rs116760485	0	30053487	A	G	1450	rs116760485_A	0.330439	0.201936
6	rs9260860	0	30053487	A	G	1451	rs9260860_A	0.331798	0.20302
6	rs114137304	0	30053573	A	G	1452	rs114137304_A	0.274652	0.16278
6	rs2246198	0	30053581	A	G	1453	rs2246198_A	0.777031	0.636429
6	rs115010417	0	30053599	A	G	1454	rs115010417_A	0.605628	0.599342
6	rs2246199	0	30053599	A	G	1455	rs2246199_A	0.596538	0.594099
6	rs115835372	0	30053720	A	G	1456	rs115835372_A	0.365473	0.225864
6	rs116165079	0	30053750	A	C	1457	rs116165079_A	0.365473	0.225864
6	rs9260863	0	30053750	A	C	1458	rs9260863_A	0.371789	0.229874
6	rs115341126	0	30053820	A	G	1459	rs115341126_A	0.336552	0.205244
6	rs9260864	0	30053820	A	G	1460	rs9260864_A	0.331798	0.20302
6	rs114826715	0	30053928	A	G	1461	rs114826715_A	0.0402017	0.0389755
6	rs3132685	0	30053928	A	G	1462	rs3132685_A	0.0308128	0.0292194
6	rs115561999	0	30053998	A	G	1463	rs115561999_A	0.335498	0.208767
6	rs114297328	0	30054432	A	G	1464	rs114297328_A	0.396303	0.250857
6	rs115866314	0	30054635	G	A	1465	rs115866314_G	0.331798	0.20302
6	rs2108691	0	30056344	A	C	1466	rs2108691_A	0.250692	0.262433
6	rs116661662	0	30056380	A	G	1467	rs116661662_A	0.331798	0.20302
6	rs115335559	0	30056536	A	G	1468	rs115335559_A	0.299477	0.180495
6	rs115974659	0	30056730	A	G	1469	rs115974659_A	0.593883	0.337358
6	rs9260918	0	30056730	A	G	1470	rs9260918_A	0.593883	0.337358
6	rs116764498	0	30056791	A	T	1471	rs116764498_A	0.0904023	0.149609
6	rs2844802	0	30056791	A	T	1472	rs2844802_A	0.0980299	0.160982
6	rs116196668	0	30056863	A	G	1473	rs116196668_A	0.337452	0.206695
6	rs114324757	0	30056920	A	G	1474	rs114324757_A	0.763392	0.86844
6	rs114877310	0	30057009	C	G	1475	rs114877310_C	0.240006	0.250677
6	rs423808	0	30057102	A	C	1476	rs423808_A	0.552026	0.565791
6	rs410909	0	30057147	A	C	1477	rs410909_A	0.240006	0.250677
6	rs115888293	0	30057321	G	A	1478	rs115888293_G	0.690545	0.924411
6	rs2246638	0	30057476	A	G	1479	rs2246638_A	0.643406	0.791328
6	rs114138639	0	30057497	A	G	1480	rs114138639_A	0.231534	0.242367
6	rs2246642	0	30057497	A	G	1481	rs2246642_A	0.240006	0.250677
6	rs114695814	0	30057768	A	G	1482	rs114695814_A	0.125582	0.0382017
6	rs2394255	0	30057800	G	A	1483	rs2394255_G	0.324054	0.380532
6	rs115844415	0	30058189	G	A	1484	rs115844415_G	0.086654	0.143805
6	rs401618	0	30058189	G	A	1485	rs401618_G	0.0880625	0.145962
6	rs115233419	0	30058562	G	A	1486	rs115233419_G	0.422267	0.455095
6	rs116553443	0	30058647	A	G	1487	rs116553443_A	0.621998	0.565916
6	rs114950038	0	30058812	C	G	1488	rs114950038_C	0.347074	0.406658
6	rs115775300	0	30058818	G	C	1489	rs115775300_G	0.459866	0.445867
6	rs114160221	0	30058958	C	A	1490	rs114160221_C	0.436499	0.423486
6	rs2517808	0	30058990	A	G	1491	rs2517808_A	0.589181	0.580088
6	rs115251642	0	30059085	G	A	1492	rs115251642_G	0.0958456	0.156855
6	rs2735067	0	30059085	G	A	1493	rs2735067_G	0.0958456	0.156855
6	rs116578749	0	30059183	A	G	1494	rs116578749_A	0.410323	0.398758
6	rs115658280	0	30059273	A	C	1495	rs115658280_A	0.423774	0.416565
6	rs115400074	0	30059761	G	A	1496	rs115400074_G	0.331032	0.200684
6	rs114757350	0	30060141	G	A	1497	rs114757350_G	0.465124	0.450714
6	rs11757750	0	30060141	G	A	1498	rs11757750_G	0.444115	0.429926
6	rs116163566	0	30060793	G	A	1499	rs116163566_G	0.419284	0.404442
6	rs115071807	0	30060899	A	G	1500	rs115071807_A	0.371461	0.362222
6	rs115946370	0	30060903	T	A	1501	rs115946370_T	0.67273	0.905722
6	rs114451194	0	30060910	A	G	1502	rs114451194_A	0.424672	0.414765
6	rs114993291	0	30061014	A	G	1503	rs114993291_A	0.460914	0.452779
6	rs115788285	0	30061078	A	G	1504	rs115788285_A	0.387123	0.371438
6	rs11755961	0	30061078	A	G	1505	rs11755961_A	0.402346	0.38404
6	rs114633038	0	30061249	G	C	1506	rs114633038_G	0.507213	0.490475
6	rs2735065	0	30061568	A	C	1507	rs2735065_A	0.920691	0.914849
6	rs114860141	0	30061607	A	G	1508	rs114860141_A	0.466968	0.455608
6	rs116251601	0	30061695	G	A	1509	rs116251601_G	0.431143	0.417474
6	rs5875226	0	30061964	I	D	1510	rs5875226_I	0.410323	0.398758
6	rs114268881	0	30062090	G	A	1511	rs114268881_G	0.48904	0.478231
6	rs114827979	0	30062178	A	G	1512	rs114827979_A	0.4072	0.39039
6	rs114537098	0	30062259	G	A	1513	rs114537098_G	0.445981	0.431666
6	rs4947244	0	30062343	G	C	1514	rs4947244_G	0.11117	0.145182
6	rs114421444	0	30062596	G	A	1515	rs114421444_G	0.398316	0.386602
6	rs114431800	0	30062621	A	G	1516	rs114431800_A	0.386264	0.378249
6	rs116013920	0	30062763	G	A	1517	rs116013920_G	0.651524	0.649182
6	rs114988554	0	30062830	G	A	1518	rs114988554_G	0.410323	0.398758
6	rs114513728	0	30063004	G	A	1519	rs114513728_G	0.372004	0.238398
6	rs3901554	0	30063004	G	A	1520	rs3901554_G	0.395061	0.256922
6	rs114912266	0	30063067	A	C	1521	rs114912266_A	0.410323	0.398758
6	rs5025708	0	30063178	C	A	1522	rs5025708_C	0.456824	0.460974
6	rs115915736	0	30063201	C	A	1523	rs115915736_C	0.411315	0.399753
6	rs116264267	0	30063367	G	A	1524	rs116264267_G	0.410323	0.398758
6	rs114024731	0	30063410	A	G	1525	rs114024731_A	0.397927	0.385289
6	rs116306180	0	30063483	A	T	1526	rs116306180_A	0.204868	0.333487
6	rs116477860	0	30063999	G	A	1527	rs116477860_G	0.405727	0.397108
6	rs115256891	0	30064028	A	G	1528	rs115256891_A	0.447061	0.438786
6	rs116562537	0	30064629	A	C	1529	rs116562537_A	0.409133	0.39734
6	rs114537101	0	30064932	G	A	1530	rs114537101_G	0.36471	0.230299
6	rs9260930	0	30064932	G	A	1531	rs9260930_G	0.372004	0.238398
6	rs115216911	0	30065048	G	A	1532	rs115216911_G	0.103295	0.137514
6	rs114977730	0	30065057	G	A	1533	rs114977730_G	0.328009	0.392375
6	rs114481163	0	30065264	C	A	1534	rs114481163_C	0.435218	0.415833
6	rs115279586	0	30065487	C	A	1535	rs115279586_C	0.408074	0.263924
6	rs116634325	0	30065781	G	A	1536	rs116634325_G	0.392374	0.247492
6	rs9260932	0	30065781	G	A	1537	rs9260932_G	0.408074	0.263924
6	rs9260934	0	30065961	A	G	1538	rs9260934_A	0.371195	0.23774
6	rs114423935	0	30067725	G	A	1539	rs114423935_G	0.330372	0.205429
6	rs116329233	0	30067914	C	G	1540	rs116329233_C	0.318286	0.196247
6	rs7749944	0	30067979	C	A	1541	rs7749944_C	0.0731709	0.0699434
6	rs7749944	0	30067979	C	A	1542	rs7749944_C.1	0.0749778	0.0715631
6	rs114862917	0	30068310	A	C	1543	rs114862917_A	0.748729	0.958044
6	rs16896853	0	30068310	A	C	1544	rs16896853_A	0.830544	0.957186
6	rs116202746	0	30068480	A	G	1545	rs116202746_A	0.000552462	0.000856695
6	rs115016730	0	30068849	A	T	1546	rs115016730_A	0.911053	0.767198
6	rs114599368	0	30068937	C	G	1547	rs114599368_C	0.91512	0.763247
6	rs116513743	0	30068978	A	C	1548	rs116513743_A	0.908927	0.768513
6	rs116535071	0	30069185	A	G	1549	rs116535071_A	0.931499	0.771835
6	rs114187835	0	30069253	G	A	1550	rs114187835_G	0.02073	0.0442901
6	rs116414439	0	30069260	A	G	1551	rs116414439_A	0.911053	0.767198
6	rs115742376	0	30069346	A	G	1552	rs115742376_A	0.915773	0.770493
6	rs114096489	0	30069418	A	C	1553	rs114096489_A	0.919015	0.775116
6	rs114451271	0	30069610	A	G	1554	rs114451271_A	0.392487	0.418094
6	rs115455095	0	30069701	A	G	1555	rs115455095_A	0.911053	0.767198
6	rs114774383	0	30069832	A	G	1556	rs114774383_A	0.94664	0.799498
6	rs116399269	0	30070247	A	G	1557	rs116399269_A	0.310384	0.189992
6	rs9260984	0	30070247	A	G	1558	rs9260984_A	0.310384	0.189992
6	rs115094340	0	30070494	G	A	1559	rs115094340_G	0.976544	0.827556
6	rs9260988	0	30070494	G	A	1560	rs9260988_G	0.979133	0.830683
6	rs115896331	0	30070720	A	G	1561	rs115896331_A	0.944778	0.829729
6	rs114465658	0	30070775	C	G	1562	rs114465658_C	0.910309	0.765685
6	rs115157072	0	30071044	A	G	1563	rs115157072_A	0.0959048	0.118442
6	rs6457121	0	30071044	A	G	1564	rs6457121_A	0.190263	0.238347
6	rs116173729	0	30071158	G	A	1565	rs116173729_G	0.832948	0.696826
6	rs6910898	0	30071158	G	A	1566	rs6910898_G	0.834554	0.698417
6	rs114069585	0	30071703	A	C	1567	rs114069585_A	0.434963	0.421065
6	rs115709770	0	30072446	G	A	1568	rs115709770_G	0.190588	0.135976
6	rs115497931	0	30072784	A	G	1569	rs115497931_A	0.552547	0.419448
6	rs114302546	0	30073285	A	G	1570	rs114302546_A	0.944366	0.798962
6	rs114934460	0	30073323	G	A	1571	rs114934460_G	0.935154	0.790106
6	rs6911279	0	30073323	G	A	1572	rs6911279_G	0.935735	0.790628
6	rs114436708	0	30073480	A	C	1573	rs114436708_A	0.737479	0.787765
6	rs6911737	0	30073480	A	C	1574	rs6911737_A	0.737479	0.787765
6	rs116568351	0	30073542	A	C	1575	rs116568351_A	0.934129	0.787767
6	rs116046402	0	30073650	A	G	1576	rs116046402_A	0.944366	0.798962
6	rs115610346	0	30073760	A	G	1577	rs115610346_A	0.988055	0.858874
6	rs9261026	0	30073952	A	G	1578	rs9261026_A	0.944366	0.798962
6	rs9261035	0	30074154	A	G	1579	rs9261035_A	0.332293	0.205539
6	rs116021206	0	30074280	A	G	1580	rs116021206_A	0.359331	0.225933
6	rs114673490	0	30074444	G	A	1581	rs114673490_G	0.366067	0.228632
6	rs114318558	0	30074766	A	G	1582	rs114318558_A	0.0103011	0.0241581
6	rs115577179	0	30074829	G	A	1583	rs115577179_G	0.944366	0.798962
6	rs114705877	0	30074875	A	G	1584	rs114705877_A	0.962346	0.92128
6	rs116540128	0	30074983	C	G	1585	rs116540128_C	0.290348	0.176662
6	rs114010067	0	30075168	A	G	1586	rs114010067_A	0.756845	0.679857
6	rs115911233	0	30075465	G	A	1587	rs115911233_G	0.332293	0.205539
6	rs114547438	0	30075508	A	G	1588	rs114547438_A	0.349007	0.217008
6	rs6923856	0	30075508	A	G	1589	rs6923856_A	0.36728	0.231426
6	rs115585259	0	30075721	G	A	1590	rs115585259_G	0.358565	0.223101
6	rs116070960	0	30075778	G	C	1591	rs116070960_G	0.461025	0.320548
6	rs115569650	0	30075969	A	G	1592	rs115569650_A	0.366067	0.228632
6	rs114976079	0	30075978	G	A	1593	rs114976079_G	0.341063	0.20809
6	rs115736869	0	30076101	A	G	1594	rs115736869_A	0.65051	0.456901
6	rs115022796	0	30076254	A	G	1595	rs115022796_A	0.412497	0.49664
6	rs116020573	0	30076743	A	G	1596	rs116020573_A	0.350369	0.22223
6	rs116238785	0	30076944	A	G	1597	rs116238785_A	0.613383	0.603905
6	rs115586048	0	30076966	G	A	1598	rs115586048_G	0.386361	0.239221
6	rs116801296	0	30077019	G	A	1599	rs116801296_G	0.332293	0.205539
6	rs115430051	0	30077169	A	G	1600	rs115430051_A	0.434963	0.421065
6	rs115733967	0	30077492	G	A	1601	rs115733967_G	0.385813	0.242815
6	rs115286047	0	30077797	G	A	1602	rs115286047_G	0.3434	0.212848
6	rs114217878	0	30077908	A	G	1603	rs114217878_A	0.332293	0.205539
6	rs116725025	0	30077952	A	C	1604	rs116725025_A	0.332293	0.205539
6	rs9261091	0	30077952	A	C	1605	rs9261091_A	0.332293	0.205539
6	rs114467164	0	30078018	A	T	1606	rs114467164_A	0.879911	0.908381
6	rs11760176	0	30078406	A	G	1607	rs11760176_A	0.325341	0.311582
6	rs116796832	0	30078568	C	A	1608	rs116796832_C	0.931099	0.91707
6	rs7758512	0	30078568	C	A	1609	rs7758512_C	0.956495	0.894181
6	rs114800379	0	30078664	G	A	1610	rs114800379_G	0.390011	0.249143
6	rs116837657	0	30078906	A	G	1611	rs116837657_A	0.42821	0.500407
6	rs116413606	0	30078991	G	A	1612	rs116413606_G	0.472992	0.563206
6	rs6905157	0	30079527	G	A	1613	rs6905157_G	0.882542	0.731381
6	rs116725690	0	30079553	A	G	1614	rs116725690_A	0.868713	0.969253
6	rs115496981	0	30080753	C	G	1615	rs115496981_C	0.572922	0.576521
6	rs114559026	0	30080963	A	G	1616	rs114559026_A	0.193857	0.310994
6	rs114095793	0	30081114	G	A	1617	rs114095793_G	0.980036	0.831585
6	rs114466399	0	30081166	A	T	1618	rs114466399_A	0.434963	0.421065
6	rs11965524	0	30081166	A	T	1619	rs11965524_A	0.944366	0.798962
6	rs116581332	0	30081371	G	A	1620	rs116581332_G	0.964683	0.8211
6	rs115092131	0	30081505	G	A	1621	rs115092131_G	0.158352	0.196603
6	rs115930371	0	30081599	G	A	1622	rs115930371_G	0.762628	0.861393
6	rs356967	0	30081889	A	G	1623	rs356967_A	0.114974	0.189183
6	rs115814721	0	30081904	G	A	1624	rs115814721_G	0.96256	0.959313
6	rs4313034	0	30081904	G	A	1625	rs4313034_G	0.96485	0.898682
6	rs114523436	0	30082133	A	G	1626	rs114523436_A	0.540485	0.377137
6	rs114440360	0	30082479	G	A	1627	rs114440360_G	0.973622	0.82654
6	rs9261105	0	30082479	G	A	1628	rs9261105_G	0.875162	0.730001
6	rs116005752	0	30082654	A	G	1629	rs116005752_A	0.613576	0.546715
6	rs114404619	0	30083026	A	C	1630	rs114404619_A	0.111002	0.181983
6	rs356968	0	30083026	A	C	1631	rs356968_A	0.111002	0.181983
6	rs116389580	0	30083074	G	C	1632	rs116389580_G	0.374839	0.23179
6	rs6940082	0	30083074	G	C	1633	rs6940082_G	0.306319	0.185023
6	rs116790848	0	30083432	A	C	1634	rs116790848_A	0.403376	0.454722
6	rs2240619	0	30083432	A	C	1635	rs2240619_A	0.39742	0.44864
6	rs115724275	0	30083698	G	A	1636	rs115724275_G	0.664654	0.643737
6	rs115873309	0	30083754	C	A	1637	rs115873309_C	0.408224	0.395932
6	rs115899313	0	30084003	G	C	1638	rs115899313_G	0.980036	0.831585
6	rs115374425	0	30084291	G	C	1639	rs115374425_G	0.833245	0.570851
6	rs117603204	0	30084965	A	G	1640	rs117603204_A	0.0386927	0.100228
6	rs115037049	0	30085124	G	C	1641	rs115037049_G	0.0756017	0.12926
6	rs115692300	0	30085454	G	C	1642	rs115692300_G	0.491253	0.741764
6	rs115603409	0	30085952	C	G	1643	rs115603409_C	0.980036	0.831585
6	rs115985025	0	30086006	A	G	1644	rs115985025_A	0.434963	0.421065
6	rs12661053	0	30086006	A	G	1645	rs12661053_A	0.434963	0.421065
6	rs116641868	0	30086331	A	G	1646	rs116641868_A	0.157505	0.195452
6	rs4713281	0	30086331	A	G	1647	rs4713281_A	0.131075	0.164105
6	rs115899276	0	30086505	G	A	1648	rs115899276_G	0.528632	0.521269
6	rs114426144	0	30086632	C	G	1649	rs114426144_C	0.613576	0.546715
6	rs116774144	0	30087368	G	A	1650	rs116774144_G	0.345558	0.215497
6	rs114218820	0	30087558	G	A	1651	rs114218820_G	0.980036	0.831585
6	rs114784126	0	30087622	A	G	1652	rs114784126_A	0.43461	0.419656
6	rs115866444	0	30087776	C	A	1653	rs115866444_C	0.0212274	0.045236
6	rs356971	0	30087776	C	A	1654	rs356971_C	0.0205646	0.0439797
6	rs116239920	0	30087805	G	A	1655	rs116239920_G	0.944366	0.798962
6	rs115329902	0	30087995	C	A	1656	rs115329902_C	0.71781	0.9233
6	rs114662508	0	30088052	G	A	1657	rs114662508_G	0.296701	0.181222
6	rs3734836	0	30088052	G	A	1658	rs3734836_G	0.302043	0.185474
6	rs116039800	0	30088169	A	G	1659	rs116039800_A	0.812729	0.77958
6	rs3115635	0	30088472	A	G	1660	rs3115635_A	0.390817	0.443933
6	rs115621121	0	30089042	G	A	1661	rs115621121_G	0.261295	0.16099
6	rs116145040	0	30089166	G	A	1662	rs116145040_G	0.332293	0.205539
6	rs115147953	0	30089406	G	A	1663	rs115147953_G	0.526658	0.594218
6	rs9261136	0	30089406	G	A	1664	rs9261136_G	0.442218	0.5068
6	rs114587875	0	30089494	A	G	1665	rs114587875_A	0.0289477	0.0134022
6	rs9261138	0	30089494	A	G	1666	rs9261138_A	0.0880689	0.0463752
6	rs115465871	0	30089729	A	G	1667	rs115465871_A	0.758061	0.85622
6	rs114432553	0	30090020	G	C	1668	rs114432553_G	0.894172	0.984103
6	rs116238313	0	30090742	C	G	1669	rs116238313_C	0.511701	0.494205
6	rs6457126	0	30091018	A	G	1670	rs6457126_A	0.392629	0.443588
6	rs114356170	0	30091123	T	A	1671	rs114356170_T	0.417072	0.500413
6	rs114019025	0	30091204	A	G	1672	rs114019025_A	0.333815	0.4075
6	rs356954	0	30091517	G	A	1673	rs356954_G	0.110013	0.180426
6	rs116542020	0	30091694	C	A	1674	rs116542020_C	0.425316	0.525033
6	rs115150143	0	30092102	A	G	1675	rs115150143_A	0.319581	0.40079
6	rs116693421	0	30092231	A	G	1676	rs116693421_A	0.141789	0.179934
6	rs9357092	0	30092231	A	G	1677	rs9357092_A	0.141789	0.179934
6	rs115293893	0	30092822	A	C	1678	rs115293893_A	0.755807	0.863441
6	rs116724742	0	30092844	A	G	1679	rs116724742_A	0.938319	0.794029
6	rs114917796	0	30093304	G	A	1680	rs114917796_G	0.319833	0.197533
6	rs115931096	0	30093467	G	A	1681	rs115931096_G	0.354003	0.220876
6	rs116554894	0	30093609	G	A	1682	rs116554894_G	0.158837	0.197211
6	rs115136522	0	30093828	A	G	1683	rs115136522_A	0.979873	0.835653
6	rs6926792	0	30093828	A	G	1684	rs6926792_A	0.931568	0.78798
6	rs115846644	0	30094121	A	G	1685	rs115846644_A	0.434963	0.421065
6	rs114175826	0	30094303	A	T	1686	rs114175826_A	0.000873939	0.000838761
6	rs3115631	0	30094303	A	T	1687	rs3115631_A	0.000616482	0.000587965
6	rs116796019	0	30094389	G	A	1688	rs116796019_G	0.850107	0.965081
6	rs114256021	0	30094406	G	A	1689	rs114256021_G	0.97002	0.824124
6	rs114797859	0	30094480	A	G	1690	rs114797859_A	0.434963	0.421065
6	rs115435602	0	30094663	G	A	1691	rs115435602_G	0.247602	0.283344
6	rs114564278	0	30095099	G	A	1692	rs114564278_G	0.967204	0.820491
6	rs114088855	0	30095101	G	A	1693	rs114088855_G	0.121152	0.163621
6	rs114336030	0	30095163	A	G	1694	rs114336030_A	0.155356	0.195809
6	rs4711206	0	30095163	A	G	1695	rs4711206_A	0.151634	0.192247
6	rs3869065	0	30095453	G	C	1696	rs3869065_G	0.504428	0.557193
6	rs115012064	0	30095717	A	G	1697	rs115012064_A	0.338457	0.21
6	rs114028028	0	30096378	A	G	1698	rs114028028_A	0.967204	0.820491
6	rs116726170	0	30096418	C	A	1699	rs116726170_C	0.349989	0.218825
6	rs3891157	0	30096418	C	A	1700	rs3891157_C	0.320963	0.198363
6	rs116084313	0	30096621	A	G	1701	rs116084313_A	0.0200079	0.042672
6	rs3129012	0	30096621	A	G	1702	rs3129012_A	0.0201888	0.0427985
6	rs116404275	0	30096719	A	G	1703	rs116404275_A	0.320963	0.198363
6	rs115362062	0	30096943	G	A	1704	rs115362062_G	0.435787	0.421955
6	rs114925851	0	30097167	G	A	1705	rs114925851_G	0.43829	0.423793
6	rs114229542	0	30097668	A	G	1706	rs114229542_A	0.434963	0.421065
6	rs115707880	0	30097674	C	G	1707	rs115707880_C	0.115279	0.199353
6	rs165255	0	30097674	G	C	1708	rs165255_G	0.086318	0.151201
6	rs114438929	0	30098004	A	G	1709	rs114438929_A	0.168658	0.1705
6	rs11970651	0	30098882	G	A	1710	rs11970651_G	0.818371	0.583882
6	rs9261156	0	30099517	A	C	1711	rs9261156_A	0.626399	0.42305
6	rs115310883	0	30099552	A	G	1712	rs115310883_A	0.424478	0.413292
6	rs114447065	0	30099628	G	A	1713	rs114447065_G	0.320963	0.198363
6	rs116494283	0	30099678	G	A	1714	rs116494283_G	0.967204	0.820491
6	rs6919617	0	30099678	G	A	1715	rs6919617_G	0.967204	0.820491
6	rs115920192	0	30099777	A	G	1716	rs115920192_A	0.320963	0.198363
6	rs114014227	0	30099846	A	G	1717	rs114014227_A	0.0245148	0.0527715
6	rs114472966	0	30099906	A	G	1718	rs114472966_A	0.285643	0.227553
6	rs115059203	0	30100240	A	G	1719	rs115059203_A	0.707819	0.671285
6	rs1150743	0	30100240	A	G	1720	rs1150743_A	0.706433	0.669813
6	rs115450853	0	30100265	A	G	1721	rs115450853_A	0.320627	0.19814
6	rs114665269	0	30100593	A	G	1722	rs114665269_A	0.434963	0.421065
6	rs115509202	0	30100716	A	G	1723	rs115509202_A	0.417072	0.500413
6	rs116045781	0	30100744	G	A	1724	rs116045781_G	0.407158	0.486752
6	rs114062315	0	30100952	A	G	1725	rs114062315_A	0.329284	0.20402
6	rs116393526	0	30101065	G	A	1726	rs116393526_G	0.320963	0.198363
6	rs115138973	0	30101175	C	G	1727	rs115138973_C	0.417072	0.500413
6	rs166325	0	30101175	C	G	1728	rs166325_C	0.417072	0.500413
6	rs115562990	0	30104100	G	A	1729	rs115562990_G	0.320963	0.198363
6	rs114360473	0	30104234	G	A	1730	rs114360473_G	0.541642	0.608732
6	rs116483615	0	30106161	G	A	1731	rs116483615_G	0.931568	0.78798
6	rs116155752	0	30106239	A	G	1732	rs116155752_A	0.320963	0.198363
6	rs115931681	0	30106630	G	C	1733	rs115931681_G	0.975207	0.82855
6	rs114194707	0	30106851	A	G	1734	rs114194707_A	0.654673	0.584916
6	rs9261185	0	30107230	G	A	1735	rs9261185_G	0.931568	0.78798
6	rs114799689	0	30108499	A	C	1736	rs114799689_A	0.428335	0.48272
6	rs9261190	0	30108693	G	A	1737	rs9261190_G	0.590298	0.523617
6	rs115438899	0	30108702	A	G	1738	rs115438899_A	0.434963	0.421065
6	rs114566308	0	30108952	C	A	1739	rs114566308_C	0.495766	0.481533
6	rs10947046	0	30108952	C	A	1740	rs10947046_C	0.565454	0.573955
6	rs113995577	0	30109682	A	G	1741	rs113995577_A	0.721914	0.815444
6	rs116465145	0	30109749	G	A	1742	rs116465145_G	0.417072	0.500413
6	rs116792403	0	30109929	A	G	1743	rs116792403_A	0.315624	0.195202
6	rs115227030	0	30110031	G	A	1744	rs115227030_G	0.114073	0.198107
6	rs116642932	0	30110152	G	A	1745	rs116642932_G	0.320963	0.198363
6	rs115656811	0	30110420	C	G	1746	rs115656811_C	0.397	0.450352
6	rs115223080	0	30110772	C	G	1747	rs115223080_C	0.532169	0.59943
6	rs3121593	0	30110772	C	G	1748	rs3121593_C	0.532108	0.599405
6	rs115032519	0	30110860	G	A	1749	rs115032519_G	0.221241	0.287034
6	rs166327	0	30110860	G	A	1750	rs166327_G	0.221241	0.287034
6	rs116735891	0	30110921	A	G	1751	rs116735891_A	0.967204	0.820491
6	rs114374251	0	30111089	G	A	1752	rs114374251_G	0.931568	0.78798
6	rs114927984	0	30111284	A	G	1753	rs114927984_A	0.923049	0.776627
6	rs9261200	0	30111284	A	G	1754	rs9261200_A	0.944152	0.800623
6	rs116167601	0	30111743	G	A	1755	rs116167601_G	0.140023	0.0430398
6	rs115503816	0	30111776	G	A	1756	rs115503816_G	0.967204	0.820491
6	rs114230713	0	30112031	A	G	1757	rs114230713_A	0.967204	0.820491
6	rs3869068	0	30112031	A	G	1758	rs3869068_A	0.967204	0.820491
6	rs116555976	0	30112165	G	C	1759	rs116555976_G	0.417072	0.500413
6	rs116044290	0	30112238	G	A	1760	rs116044290_G	0.967204	0.820491
6	rs116339860	0	30112350	T	A	1761	rs116339860_T	0.116963	0.191361
6	rs259931	0	30112350	T	A	1762	rs259931_T	0.118735	0.19447
6	rs115329622	0	30112677	G	A	1763	rs115329622_G	0.435451	0.421647
6	rs115715853	0	30113022	G	A	1764	rs115715853_G	0.317558	0.195722
6	rs116555982	0	30113284	A	G	1765	rs116555982_A	0.215924	0.343586
6	rs114218355	0	30113290	G	A	1766	rs114218355_G	0.931568	0.78798
6	rs116373137	0	30113733	A	C	1767	rs116373137_A	0.163402	0.202023
6	rs4711207	0	30113733	A	C	1768	rs4711207_A	0.15073	0.186586
6	rs115337808	0	30114461	G	A	1769	rs115337808_G	0.297639	0.18172
6	rs115966004	0	30114491	C	A	1770	rs115966004_C	0.425806	0.411914
6	rs115678795	0	30114744	A	G	1771	rs115678795_A	0.161818	0.20073
6	rs9405044	0	30114744	A	G	1772	rs9405044_A	0.154714	0.192572
6	rs116571013	0	30114784	A	G	1773	rs116571013_A	0.721914	0.815444
6	rs115130701	0	30114855	A	G	1774	rs115130701_A	0.117306	0.192146
6	rs114329002	0	30115030	A	G	1775	rs114329002_A	0.211117	0.336113
6	rs259935	0	30115030	A	G	1776	rs259935_A	0.210702	0.335636
6	rs115488962	0	30115095	G	A	1777	rs115488962_G	0.434963	0.421065
6	rs116335674	0	30115472	G	A	1778	rs116335674_G	0.417072	0.500413
6	rs259937	0	30115472	G	A	1779	rs259937_G	0.417072	0.500413
6	rs115677244	0	30115690	A	G	1780	rs115677244_A	0.434963	0.421065
6	rs115141117	0	30115963	A	G	1781	rs115141117_A	0.423872	0.410186
6	rs259938	0	30115982	C	G	1782	rs259938_C	0.215737	0.342518
6	rs114592530	0	30116022	A	G	1783	rs114592530_A	0.814663	0.922544
6	rs6915205	0	30116022	A	G	1784	rs6915205_A	0.814663	0.922544
6	rs114740580	0	30116725	C	A	1785	rs114740580_C	0.167815	0.206569
6	rs3910312	0	30116725	C	A	1786	rs3910312_C	0.167815	0.206569
6	rs115537614	0	30116975	G	A	1787	rs115537614_G	0.551993	0.619033
6	rs115984845	0	30117588	G	A	1788	rs115984845_G	0.318958	0.196902
6	rs114653275	0	30117643	G	A	1789	rs114653275_G	0.434963	0.421065
6	rs9261215	0	30117758	C	A	1790	rs9261215_C	0.590222	0.524628
6	rs9261215	0	30117758	C	A	1791	rs9261215_C.1	0.591075	0.525823
6	rs116549889	0	30118118	G	A	1792	rs116549889_G	0.967204	0.820491
6	rs116676427	0	30118471	G	A	1793	rs116676427_G	0.163706	0.205778
6	rs9380150	0	30118471	G	A	1794	rs9380150_G	0.175211	0.219388
6	rs116311506	0	30118487	G	A	1795	rs116311506_G	0.967204	0.820491
6	rs115154095	0	30118869	G	A	1796	rs115154095_G	0.436127	0.422142
6	rs115527186	0	30118936	A	G	1797	rs115527186_A	0.417072	0.500413
6	rs116147869	0	30119254	A	G	1798	rs116147869_A	0.320963	0.198363
6	rs115297621	0	30119430	A	G	1799	rs115297621_A	0.450389	0.338739
6	rs116537348	0	30119560	G	A	1800	rs116537348_G	0.223932	0.354529
6	rs259939	0	30119560	G	A	1801	rs259939_G	0.223932	0.354529
6	rs114931069	0	30119781	A	C	1802	rs114931069_A	0.725846	0.406728
6	rs11965452	0	30119781	A	C	1803	rs11965452_A	0.737536	0.40867
6	rs115930919	0	30119842	A	C	1804	rs115930919_A	0.320963	0.198363
6	rs259940	0	30119913	G	A	1805	rs259940_G	0.112638	0.197547
6	rs115133546	0	30120319	A	G	1806	rs115133546_A	0.434963	0.421065
6	rs114315683	0	30120603	A	G	1807	rs114315683_A	0.721914	0.815444
6	rs116450598	0	30120739	G	A	1808	rs116450598_G	0.743616	0.838701
6	rs114803444	0	30121751	G	A	1809	rs114803444_G	0.320963	0.198363
6	rs115430143	0	30121866	A	G	1810	rs115430143_A	0.333361	0.131822
6	rs116000261	0	30122436	A	G	1811	rs116000261_A	0.320963	0.198363
6	rs115119809	0	30122646	G	A	1812	rs115119809_G	0.296108	0.11074
6	rs114460244	0	30123146	A	G	1813	rs114460244_A	0.771912	0.479809
6	rs259942	0	30123146	A	G	1814	rs259942_A	0.771912	0.479809
6	rs116127162	0	30123309	G	A	1815	rs116127162_G	0.124644	0.202964
6	rs259943	0	30123309	G	A	1816	rs259943_G	0.121838	0.198827
6	rs115677230	0	30123573	A	C	1817	rs115677230_A	0.194945	0.241398
6	rs116725370	0	30123706	A	C	1818	rs116725370_A	0.615714	0.548516
6	rs116295763	0	30123884	G	A	1819	rs116295763_G	0.754643	0.933445
6	rs3134879	0	30123884	G	A	1820	rs3134879_G	0.755265	0.932539
6	rs114193724	0	30124276	C	A	1821	rs114193724_C	0.434963	0.421065
6	rs6457138	0	30124276	C	A	1822	rs6457138_C	0.434963	0.421065
6	rs114959639	0	30124360	C	A	1823	rs114959639_C	0.305745	0.122399
6	rs115826761	0	30124552	G	A	1824	rs115826761_G	0.320963	0.198363
6	rs116519681	0	30124789	A	T	1825	rs116519681_A	0.291717	0.112686
6	rs12208727	0	30125010	G	A	1826	rs12208727_G	0.174755	0.131771
6	rs115721109	0	30125608	A	T	1827	rs115721109_A	0.225925	0.133975
6	rs114061475	0	30125735	G	A	1828	rs114061475_G	0.417072	0.500413
6	rs114607954	0	30125738	G	A	1829	rs114607954_G	0.307742	0.11957
6	rs259945	0	30127185	T	A	1830	rs259945_T	0.139671	0.0907728
6	rs116726751	0	30127623	A	C	1831	rs116726751_A	0.613576	0.546715
6	rs116794496	0	30127748	A	T	1832	rs116794496_A	0.298818	0.115634
6	rs115499203	0	30128024	A	G	1833	rs115499203_A	0.127128	0.0804554
6	rs114547882	0	30129728	A	G	1834	rs114547882_A	0.662342	0.647958
6	rs115696625	0	30129920	C	G	1835	rs115696625_C	0.333361	0.131822
6	rs114604263	0	30130132	A	G	1836	rs114604263_A	0.331573	0.130944
6	rs7761314	0	30130132	A	G	1837	rs7761314_A	0.333361	0.131822
6	rs116703179	0	30130557	A	G	1838	rs116703179_A	0.109446	0.0682506
6	rs114294537	0	30130577	G	A	1839	rs114294537_G	0.721914	0.815444
6	rs115230033	0	30130736	G	A	1840	rs115230033_G	0.523757	0.602609
6	rs114439499	0	30130787	A	G	1841	rs114439499_A	0.333361	0.131822
6	rs114490207	0	30131058	G	A	1842	rs114490207_G	0.0209967	0.045912
6	rs114374550	0	30131847	G	A	1843	rs114374550_G	0.155336	0.118279
6	rs3869070	0	30131847	G	A	1844	rs3869070_G	0.164384	0.125521
6	rs114898901	0	30132242	A	G	1845	rs114898901_A	0.145484	0.0405288
6	rs112048132	0	30132344	G	A	1846	rs112048132_G	0.242538	0.0873749
6	rs9261261	0	30132344	G	A	1847	rs9261261_G	0.339073	0.134997
6	rs6928431	0	30132363	T	A	1848	rs6928431_T	0.507645	0.570699
6	rs116298703	0	30132373	A	G	1849	rs116298703_A	0.333361	0.131822
6	rs116456685	0	30132656	A	G	1850	rs116456685_A	0.0287578	0.0191959
6	rs9366752	0	30132656	A	G	1851	rs9366752_A	0.0287578	0.0191959
6	rs116793054	0	30132728	C	G	1852	rs116793054_C	0.320963	0.198363
6	rs116604614	0	30133081	A	G	1853	rs116604614_A	0.0194521	0.0207167
6	rs116648556	0	30133158	A	G	1854	rs116648556_A	0.333361	0.131822
6	rs6911724	0	30133158	A	G	1855	rs6911724_A	0.333361	0.131822
6	rs115527824	0	30133189	G	A	1856	rs115527824_G	0.320963	0.198363
6	rs114518910	0	30133264	A	G	1857	rs114518910_A	0.33148	0.128506
6	rs116217801	0	30133482	A	G	1858	rs116217801_A	0.0391183	0.0380952
6	rs259919	0	30133482	A	G	1859	rs259919_A	0.0391183	0.0380952
6	rs115942806	0	30133628	G	A	1860	rs115942806_G	0.304317	0.289735
6	rs115694442	0	30133738	A	G	1861	rs115694442_A	0.417072	0.500413
6	rs116154879	0	30133963	C	G	1862	rs116154879_C	0.307839	0.119678
6	rs115928788	0	30134125	G	A	1863	rs115928788_G	0.850107	0.965081
6	rs16896944	0	30134125	G	A	1864	rs16896944_G	0.850107	0.965081
6	rs17187553	0	30134143	G	A	1865	rs17187553_G	0.512523	0.718798
6	rs116688368	0	30134215	A	G	1866	rs116688368_A	0.997035	0.941176
6	rs114555753	0	30134269	G	A	1867	rs114555753_G	0.70383	0.795168
6	rs10484549	0	30134269	G	A	1868	rs10484549_G	0.706517	0.798798
6	rs115131202	0	30134329	G	A	1869	rs115131202_G	0.320963	0.198363
6	rs115324207	0	30134410	A	C	1870	rs115324207_A	0.107086	0.0295487
6	rs114269250	0	30134747	A	G	1871	rs114269250_A	0.721914	0.815444
6	rs116556453	0	30135392	A	G	1872	rs116556453_A	0.323529	0.12834
6	rs116055884	0	30135431	C	G	1873	rs116055884_C	0.525025	0.588653
6	rs114579793	0	30135839	A	G	1874	rs114579793_A	0.735173	0.810439
6	rs3132129	0	30135839	A	G	1875	rs3132129_A	0.527409	0.592842
6	rs115146597	0	30136331	A	G	1876	rs115146597_A	0.72611	0.406972
6	rs3757328	0	30136331	A	G	1877	rs3757328_A	0.72611	0.406972
6	rs115459021	0	30136403	C	A	1878	rs115459021_C	0.289885	0.10739
6	rs3757329	0	30136403	C	A	1879	rs3757329_C	0.333361	0.131822
6	rs114225239	0	30136456	G	A	1880	rs114225239_G	0.320963	0.198363
6	rs114182975	0	30136531	A	G	1881	rs114182975_A	0.613576	0.546715
6	rs116452070	0	30136585	A	C	1882	rs116452070_A	0.692891	0.384946
6	rs3757333	0	30136585	A	C	1883	rs3757333_A	0.72611	0.406972
6	rs115999600	0	30136779	G	A	1884	rs115999600_G	0.160168	0.197902
6	rs7769930	0	30136786	C	A	1885	rs7769930_C	0.307839	0.119678
6	rs1150742	0	30136810	G	A	1886	rs1150742_G	0.128676	0.208566
6	rs7770505	0	30136892	A	G	1887	rs7770505_A	0.345929	0.215544
6	rs116676006	0	30137088	G	C	1888	rs116676006_G	0.279121	0.103324
6	rs7770557	0	30137088	G	C	1889	rs7770557_G	0.307839	0.119678
6	rs114359799	0	30137238	C	G	1890	rs114359799_C	0.347276	0.333006
6	rs114670809	0	30137322	A	C	1891	rs114670809_A	0.690545	0.924411
6	rs115299819	0	30138036	A	G	1892	rs115299819_A	0.320963	0.198363
6	rs114191643	0	30138093	A	G	1893	rs114191643_A	0.489392	0.551813
6	rs111406620	0	30138114	A	G	1894	rs111406620_A	0.292094	0.176718
6	rs116052764	0	30138168	A	T	1895	rs116052764_A	0.320963	0.198363
6	rs116765795	0	30138668	A	C	1896	rs116765795_A	0.134	0.0847876
6	rs1150740	0	30138668	A	C	1897	rs1150740_A	0.127891	0.0815973
6	rs114897040	0	30138768	A	G	1898	rs114897040_A	0.333361	0.131822
6	rs9261275	0	30138907	A	G	1899	rs9261275_A	0.325997	0.128417
6	rs114059138	0	30139038	A	G	1900	rs114059138_A	0.320963	0.198363
6	rs114622275	0	30139070	G	A	1901	rs114622275_G	0.339868	0.138901
6	rs1150739	0	30139324	G	A	1902	rs1150739_G	0.0843075	0.0798407
6	rs114331393	0	30139341	A	G	1903	rs114331393_A	0.321927	0.126156
6	rs114705281	0	30139435	A	G	1904	rs114705281_A	0.721914	0.815444
6	rs115856529	0	30140298	G	C	1905	rs115856529_G	0.41564	0.612419
6	rs116149953	0	30140474	G	A	1906	rs116149953_G	0.906636	0.764223
6	rs116480994	0	30140501	C	A	1907	rs116480994_C	0.0207552	0.0227962
6	rs8321	0	30140501	C	A	1908	rs8321_C	0.0204189	0.0224774
6	rs114739617	0	30140652	G	A	1909	rs114739617_G	0.755891	0.737721
6	rs3188482	0	30140652	G	A	1910	rs3188482_G	0.759199	0.740527
6	rs116253474	0	30140896	G	A	1911	rs116253474_G	0.677814	0.760147
6	rs114805406	0	30141451	G	A	1912	rs114805406_G	0.530898	0.59871
6	rs116674671	0	30141669	A	C	1913	rs116674671_A	0.325369	0.201812
6	rs3807030	0	30141669	A	C	1914	rs3807030_A	0.325369	0.201812
6	rs116131149	0	30141863	A	C	1915	rs116131149_A	0.114348	0.166025
6	rs3807031	0	30141863	A	C	1916	rs3807031_A	0.114348	0.166025
6	rs116034860	0	30142163	G	A	1917	rs116034860_G	0.613576	0.546715
6	rs114346141	0	30142268	G	A	1918	rs114346141_G	0.993957	0.951288
6	rs114594700	0	30143068	A	C	1919	rs114594700_A	0.12009	0.0756642
6	rs115497578	0	30143320	A	G	1920	rs115497578_A	0.858914	0.956379
6	rs114813595	0	30143486	T	A	1921	rs114813595_T	0.415599	0.612286
6	rs115679178	0	30143784	T	A	1922	rs115679178_T	0.325369	0.201812
6	rs116147561	0	30144062	A	C	1923	rs116147561_A	0.325369	0.201812
6	rs9261285	0	30144062	A	C	1924	rs9261285_A	0.325369	0.201812
6	rs114999050	0	30144248	G	A	1925	rs114999050_G	0.325369	0.201812
6	rs115051271	0	30144312	G	C	1926	rs115051271_G	0.721797	0.815292
6	rs116620177	0	30144450	A	C	1927	rs116620177_A	0.975432	0.830063
6	rs2074482	0	30144450	A	C	1928	rs2074482_A	0.976496	0.831419
6	rs17187707	0	30144507	G	A	1929	rs17187707_G	0.259317	0.213986
6	rs114117899	0	30144549	G	A	1930	rs114117899_G	0.325369	0.201812
6	rs116449930	0	30145332	A	G	1931	rs116449930_A	0.614971	0.548079
6	rs9261288	0	30145332	A	G	1932	rs9261288_A	0.613576	0.546715
6	rs115822288	0	30145595	A	C	1933	rs115822288_A	0.613576	0.546715
6	rs115882910	0	30145696	C	A	1934	rs115882910_C	0.101324	0.118547
6	rs116710187	0	30145969	G	A	1935	rs116710187_G	0.527664	0.593405
6	rs1245371	0	30146331	G	A	1936	rs1245371_G	0.0847544	0.156779
6	rs116714959	0	30146362	C	G	1937	rs116714959_C	0.131224	0.0796113
6	rs115497370	0	30146626	G	A	1938	rs115497370_G	0.0162969	0.0180093
6	rs9261290	0	30146626	G	A	1939	rs9261290_G	0.0162969	0.0180093
6	rs114577955	0	30146691	A	G	1940	rs114577955_A	0.701253	0.578534
6	rs9261291	0	30146691	A	G	1941	rs9261291_A	0.608099	0.740973
6	rs115037604	0	30146802	G	A	1942	rs115037604_G	0.434667	0.41879
6	rs115745708	0	30147219	A	C	1943	rs115745708_A	0.751226	0.618916
6	rs2301753	0	30147219	A	C	1944	rs2301753_A	0.945853	0.794124
6	rs114516919	0	30147463	A	G	1945	rs114516919_A	0.318478	0.196594
6	rs2301751	0	30147463	A	G	1946	rs2301751_A	0.320963	0.198363
6	rs114102189	0	30147546	A	T	1947	rs114102189_A	0.434667	0.41879
6	rs115082201	0	30147620	G	A	1948	rs115082201_G	0.967556	0.822897
6	rs114315771	0	30147671	A	G	1949	rs114315771_A	0.891191	0.948477
6	rs115290895	0	30147731	T	A	1950	rs115290895_T	0.320963	0.198363
6	rs116618813	0	30147746	G	C	1951	rs116618813_G	0.435207	0.419299
6	rs114108823	0	30147824	A	G	1952	rs114108823_A	0.93192	0.790364
6	rs116401500	0	30147880	A	G	1953	rs116401500_A	0.965272	0.820763
6	rs115800128	0	30147987	C	A	1954	rs115800128_C	0.955524	0.812292
6	rs115819718	0	30148063	A	G	1955	rs115819718_A	0.141645	0.18218
6	rs9393989	0	30148063	A	G	1956	rs9393989_A	0.141645	0.18218
6	rs115146263	0	30148164	A	G	1957	rs115146263_A	0.967556	0.822897
6	rs115550514	0	30148270	A	G	1958	rs115550514_A	0.138461	0.174752
6	rs116533454	0	30148376	A	G	1959	rs116533454_A	0.543941	0.42845
6	rs115441264	0	30148582	A	G	1960	rs115441264_A	0.133677	0.168696
6	rs116518960	0	30148789	C	A	1961	rs116518960_C	0.921073	0.778194
6	rs115437588	0	30148988	G	A	1962	rs115437588_G	0.967556	0.822897
6	rs2074479	0	30148988	G	A	1963	rs2074479_G	0.967556	0.822897
6	rs115631878	0	30149015	A	G	1964	rs115631878_A	0.721914	0.815444
6	rs114578400	0	30149488	A	G	1965	rs114578400_A	0.435641	0.419658
6	rs115454480	0	30149538	G	A	1966	rs115454480_G	0.716155	0.827601
6	rs9261301	0	30149538	G	A	1967	rs9261301_G	0.712273	0.82405
6	rs116010480	0	30150188	A	C	1968	rs116010480_A	0.0338402	0.0687898
6	rs116208718	0	30150328	A	G	1969	rs116208718_A	0.944119	0.800213
6	rs114899566	0	30150495	G	A	1970	rs114899566_G	0.850107	0.965081
6	rs115673004	0	30150647	G	A	1971	rs115673004_G	0.541289	0.374604
6	rs114057639	0	30150840	C	G	1972	rs114057639_C	0.4548	0.443396
6	rs2285805	0	30150840	C	G	1973	rs2285805_C	0.4548	0.443396
6	rs115163487	0	30150934	A	G	1974	rs115163487_A	0.207497	0.331666
6	rs114131484	0	30151465	G	A	1975	rs114131484_G	0.399122	0.3763
6	rs115797047	0	30151758	C	G	1976	rs115797047_C	0.407343	0.470944
6	rs116299029	0	30151934	A	G	1977	rs116299029_A	0.491884	0.533049
6	rs3807033	0	30151934	A	G	1978	rs3807033_A	0.489242	0.530324
6	rs115512255	0	30151971	G	A	1979	rs115512255_G	0.995167	0.817109
6	rs115296416	0	30152228	A	C	1980	rs115296416_A	0.513988	0.561914
6	rs114188496	0	30152367	C	G	1981	rs114188496_C	0.199133	0.230656
6	rs114798492	0	30152806	A	G	1982	rs114798492_A	0.987606	0.799757
6	rs3807035	0	30152806	A	G	1983	rs3807035_A	0.987606	0.799757
6	rs116522833	0	30152893	A	G	1984	rs116522833_A	0.339759	0.213001
6	rs3807036	0	30152893	A	G	1985	rs3807036_A	0.340571	0.213591
6	rs116203264	0	30152965	A	G	1986	rs116203264_A	0.120626	0.173755
6	rs115631432	0	30153178	A	G	1987	rs115631432_A	0.107617	0.195687
6	rs1150735	0	30153178	A	G	1988	rs1150735_A	0.105789	0.193423
6	rs115049602	0	30153376	G	A	1989	rs115049602_G	0.240538	0.211432
6	rs114005297	0	30153470	G	A	1990	rs114005297_G	0.138772	0.187294
6	rs114076521	0	30153474	G	A	1991	rs114076521_G	0.160585	0.212833
6	rs114616477	0	30153689	G	A	1992	rs114616477_G	0.530669	0.520662
6	rs116208055	0	30153710	G	A	1993	rs116208055_G	0.516961	0.723544
6	rs115199282	0	30153825	A	G	1994	rs115199282_A	0.53263	0.742233
6	rs115416863	0	30153861	A	C	1995	rs115416863_A	0.160585	0.212833
6	rs114091685	0	30153937	G	A	1996	rs114091685_G	0.496241	0.699563
6	rs115308766	0	30153990	A	G	1997	rs115308766_A	0.516342	0.562555
6	rs114249597	0	30154225	A	G	1998	rs114249597_A	0.527225	0.73376
6	rs2394734	0	30154225	A	G	1999	rs2394734_A	0.518853	0.72568
[truncated: 5,854 more rows]
