# Supplementary material for: Amino acid residues in five separate HLA genes can explain most of the known associations between the MHC and primary biliary cholangitis
Source: PLoS Genet. 2018 Dec 3;14(12):e1007833. doi: 10.1371/journal.pgen.1007833 (PMC6292650; doi:10.1371/journal.pgen.1007833)
Supplement: S14 Spreadsheet — (XLSX) [file pgen.1007833.s042.xlsx]

## Sheet: SupFig7and10spreadsheet
V1	V2	V3	V4	V5	V6	SNPno	SNPname	nullAIC	altAIC	PvalGuessFM2and5	PvalGuessFM5and5	Pvalsnppicker2and5	Pvalsnppicker2and7	PvalFinemap4	PvalFinemap5	PvalFinemap6	PvalFinemap7
6	rs7740510	0	25713491	G	A	1	rs7740510_G	12248.3	12245.7	0.0312571	0.106052	0.0136439	0.0490529	0.0131474	0.0270253	0.0231269	0.0209447
6	rs742132	0	25715550	G	A	2	rs742132_G	12247.4	12247.8	0.210814	0.0813168	0.41391	0.187387	0.269486	0.234216	0.211401	0.159097
6	rs13191296	0	25792585	A	G	3	rs13191296_A	12248.3	12241.1	0.00243848	3.72943e-07	0.0413102	2.37944e-05	0.00648047	0.000624327	0.000187257	0.00066989
6	rs9379780	0	25815150	G	A	4	rs9379780_G	12248.3	12245.7	0.0319239	0.00635198	0.149357	0.0107406	0.0830536	0.0245785	0.0270838	0.0379636
6	rs16890972	0	25835427	A	G	5	rs16890972_A	12248.3	12250.2	0.760796	0.46943	0.94996	0.658629	0.720023	0.84299	0.91447	0.682647
6	rs34932751	0	25870220	G	A	6	rs34932751_G	12248.3	12247.4	0.0887303	0.0990528	0.0704157	0.0904136	0.0728286	0.06303	0.0666496	0.0703147
6	rs4712969	0	25872171	A	G	7	rs4712969_A	12248.3	12241.7	0.00332971	8.90523e-07	0.0504184	5.76919e-05	0.00959245	0.000941449	0.000342999	0.00103217
6	rs1892250	0	25877003	A	G	8	rs1892250_A	12247.9	12241.3	0.0033083	8.86857e-07	0.0500868	5.74472e-05	0.00951305	0.000933346	0.000341178	0.00102691
6	rs2328893	0	25878218	A	G	9	rs2328893_A	12248	12248.8	0.277867	0.043065	0.833867	0.112724	0.609009	0.334115	0.256002	0.249061
6	rs6910549	0	25888790	A	G	10	rs6910549_A	12247.7	12245	0.0299907	4.47459e-05	0.200102	0.000981317	0.0543587	0.00926839	0.00381464	0.00821889
6	rs1892253	0	25890293	A	C	11	rs1892253_A	12244.8	12242.2	0.0311655	4.77212e-05	0.204831	0.00102999	0.0560347	0.00962442	0.00398556	0.00857088
6	rs1324082	0	25909950	A	G	12	rs1324082_A	12248.3	12248.7	0.208035	0.0226561	0.658916	0.0686412	0.391795	0.186781	0.165967	0.192152
6	rs12182983	0	25926734	A	G	13	rs12182983_A	12248.3	12247	0.068886	0.00335557	0.291778	0.0168984	0.157655	0.059483	0.0496628	0.0612549
6	rs6913879	0	25928407	G	A	14	rs6913879_G	12246.7	12247.1	0.203444	0.0211315	0.651325	0.0666976	0.384628	0.181607	0.161453	0.185971
6	rs6940698	0	25929559	A	G	15	rs6940698_A	12248.3	12243.9	0.0114415	6.57213e-06	0.115368	0.000304844	0.0255318	0.00304843	0.00135988	0.00357547
6	rs17342717	0	25929749	A	G	16	rs17342717_A	12248.3	12249.1	0.279037	0.371032	0.142665	0.330374	0.1054	0.317257	0.191744	0.246302
6	rs13199775	0	25936761	T	A	17	rs13199775_T	12248.3	12243.8	0.010527	5.82457e-06	0.109931	0.000276428	0.024076	0.00282863	0.00124005	0.00331136
6	rs1324088	0	25949101	A	G	18	rs1324088_A	12243.4	12242.9	0.11239	0.00077109	0.565994	0.00851662	0.252534	0.069501	0.0332333	0.0481184
6	rs1324087	0	25949387	A	G	19	rs1324087_A	12248.3	12247.7	0.103167	0.000672947	0.536055	0.00763646	0.235321	0.0637877	0.030276	0.0437401
6	rs4712976	0	25950182	A	G	20	rs4712976_A	12242.4	12241.3	0.082384	0.0413624	0.283193	0.0701217	0.262049	0.108655	0.151509	0.135075
6	rs1408272	0	25950930	C	A	21	rs1408272_C	12248.3	12250.3	0.909679	0.942845	0.566724	0.918548	0.474929	0.883706	0.642855	0.821232
6	rs1165148	0	25952689	A	C	22	rs1165148_A	12248.3	12249.5	0.369234	0.0322211	0.909213	0.107353	0.640983	0.329188	0.264417	0.262867
6	rs1165189	0	25957758	C	A	23	rs1165189_C	12246	12247.1	0.355829	0.0290013	0.884263	0.101233	0.61724	0.312914	0.249791	0.248981
6	rs1182814	0	25967533	G	A	24	rs1182814_G	12248.3	12249.6	0.381509	0.033753	0.926735	0.111703	0.660901	0.343401	0.273363	0.27283
6	rs1408271	0	25967600	A	T	25	rs1408271_A	12248.3	12246.9	0.0634259	0.0221286	0.196105	0.0416383	0.161455	0.063863	0.0937171	0.087092
6	rs1165164	0	25971460	A	G	26	rs1165164_A	12248.3	12249.7	0.42083	0.032912	0.96608	0.137289	0.727772	0.406718	0.318629	0.320092
6	rs1165162	0	25971584	A	G	27	rs1165162_A	12248.3	12249.6	0.381509	0.033753	0.926735	0.111703	0.660901	0.343401	0.273363	0.27283
6	rs1165158	0	25972877	A	C	28	rs1165158_A	12238.6	12239.9	0.39314	0.0351232	0.944703	0.115543	0.680352	0.357446	0.281593	0.281528
6	rs1165205	0	25978521	T	A	29	rs1165205_T	12247.8	12249.6	0.632815	0.843641	0.504494	0.978527	0.644183	0.686202	0.91722	0.897576
6	rs501220	0	25981004	A	C	30	rs501220_A	12247.2	12245.8	0.0649271	0.000282819	0.410831	0.00414661	0.161587	0.0380526	0.0169129	0.0252744
6	rs13198474	0	25982402	A	G	31	rs13198474_A	12248.3	12243.1	0.00721627	1.66095e-06	0.0936303	0.000106807	0.0163559	0.00183623	0.000661968	0.00211474
6	rs629444	0	25993793	A	G	32	rs629444_A	12248.3	12246.6	0.0529684	0.000172602	0.270421	0.00257739	0.0773932	0.0172828	0.00794534	0.0159854
6	rs9467632	0	25997685	G	A	33	rs9467632_G	12248.3	12247.5	0.0955614	0.000269499	0.433867	0.00551799	0.140027	0.0305066	0.0158616	0.0327171
6	rs3734523	0	26033966	A	G	34	rs3734523_A	12245.7	12236.2	0.000706969	6.16736e-08	0.0160893	6.52728e-06	0.00204563	0.000159951	4.59471e-05	0.000141254
6	rs6940007	0	26039936	C	A	35	rs6940007_C	12248.3	12246.6	0.0542102	7.6035e-05	0.329537	0.00229623	0.0998278	0.0197004	0.00846263	0.0182968
6	rs17587226	0	26070283	A	G	36	rs17587226_A	12247.9	12245.3	0.0310013	1.99105e-05	0.226034	0.000713031	0.0540292	0.00917863	0.00309655	0.00847133
6	rs76757832	0	26077610	A	G	37	rs76757832_A	12248.3	12250.3	0.906764	0.835042	0.816074	0.942231	0.827585	0.917324	0.971605	0.969295
6	rs13196552	0	26082183	G	A	38	rs13196552_G	12248.3	12248.1	0.132386	0.000874507	0.738095	0.0155971	0.289917	0.0825205	0.0504948	0.0935751
6	rs13212534	0	26090989	A	G	39	rs13212534_A	12203.2	12196	0.00245882	1.93534e-07	0.0469359	2.59444e-05	0.00696912	0.000655217	0.000188448	0.000685647
6	rs17587597	0	26094430	A	G	40	rs17587597_A	12248.3	12247.5	0.0908383	0.000160843	0.443727	0.00501215	0.140254	0.0307069	0.0154355	0.0321356
6	rs16891235	0	26125521	G	A	41	rs16891235_G	12248.3	12248.4	0.166207	0.00132588	0.819791	0.0217817	0.345353	0.105176	0.0651177	0.115588
6	rs3734528	0	26130223	G	A	42	rs3734528_G	12247.8	12247.8	0.157709	0.00119213	0.800671	0.0197782	0.336817	0.101772	0.061717	0.110512
6	rs10484433	0	26138471	A	C	43	rs10484433_A	12248.3	12248.3	0.154516	0.00108263	0.797581	0.0197149	0.333553	0.100197	0.0606697	0.109141
6	rs11751732	0	26152043	A	G	44	rs11751732_A	12245.3	12247	0.55362	0.841673	0.600782	0.659603	0.873071	0.882635	0.662804	0.702913
6	rs9689245	0	26158824	A	G	45	rs9689245_A	12248	12250	0.993629	0.979131	0.94122	0.894095	0.39258	0.522012	0.791593	0.76326
6	rs13220395	0	26163347	A	G	46	rs13220395_A	12247.7	12246.6	0.0779202	0.000120792	0.40861	0.00411931	0.128238	0.0272867	0.0130743	0.0274629
6	rs16891264	0	26180424	G	A	47	rs16891264_G	12248.3	12246.8	0.0610459	8.90824e-05	0.343415	0.00287064	0.101166	0.0206036	0.00929646	0.0200036
6	rs2071303	0	26199315	G	A	48	rs2071303_G	12244.4	12241.7	0.0306734	0.00210694	0.174129	0.0134859	0.0940064	0.0317601	0.0245501	0.0284159
6	rs1800562	0	26201120	A	G	49	rs1800562_A	12245.9	12247.2	0.387886	0.518904	0.179501	0.401102	0.132599	0.386561	0.229079	0.338826
6	rs17596719	0	26205173	A	G	50	rs17596719_A	12248.3	12250.2	0.739363	0.592063	0.763079	0.561385	0.313543	0.406905	0.525216	0.47009
6	rs198854	0	26212036	A	G	51	rs198854_A	12244.3	12243.1	0.0715833	0.00875259	0.348648	0.0495042	0.473811	0.182368	0.101111	0.115834
6	rs198846	0	26215442	A	G	52	rs198846_A	12246.9	12247.4	0.226588	0.339337	0.272799	0.282284	0.380436	0.321946	0.285854	0.20883
6	rs198844	0	26216261	C	G	53	rs198844_C	12247.8	12246.6	0.0705501	0.00883789	0.344239	0.0485258	0.468029	0.178877	0.0995246	0.114272
6	rs16891315	0	26219735	G	A	54	rs16891315_G	12248.3	12247.8	0.110913	0.000616181	0.660781	0.0117656	0.257884	0.0697279	0.0387564	0.0713702
6	rs198838	0	26221319	A	G	55	rs198838_A	12238.5	12237.4	0.0806325	0.0107667	0.379644	0.0570464	0.509484	0.201687	0.115914	0.133088
6	rs198837	0	26221377	T	A	56	rs198837_T	12219.3	12218.1	0.0722024	0.00887842	0.351789	0.0502103	0.476544	0.18418	0.100676	0.115879
6	rs13161	0	26222681	G	A	57	rs13161_G	12248.3	12247	0.0691813	0.00863485	0.341776	0.0483124	0.465657	0.177604	0.098976	0.113746
6	rs707896	0	26224403	A	G	58	rs707896_A	12248.3	12249.3	0.316376	0.153809	0.4613	0.309015	0.421522	0.364891	0.343197	0.360462
6	rs198829	0	26226872	A	G	59	rs198829_A	12226.3	12224.6	0.0566214	0.00753501	0.314699	0.0412776	0.440107	0.167667	0.08609	0.0978494
6	rs198828	0	26227438	G	A	60	rs198828_G	12247.7	12245.7	0.0448958	0.00561386	0.270193	0.0325995	0.38214	0.137682	0.0703635	0.0801193
6	rs198826	0	26229132	G	A	61	rs198826_G	12248.3	12246.4	0.0469995	0.00566596	0.276694	0.033306	0.397071	0.143321	0.0736009	0.0837973
6	rs198825	0	26230481	A	G	62	rs198825_A	12247.7	12245.7	0.0454412	0.00542379	0.270693	0.0318677	0.390304	0.139545	0.0706614	0.0810306
6	rs198821	0	26231608	A	G	63	rs198821_A	12248.3	12246.4	0.0489366	0.00643882	0.277098	0.0353563	0.386048	0.140461	0.074071	0.0848512
6	rs16891334	0	26232282	G	A	64	rs16891334_G	12246.5	12245	0.060649	0.000145578	0.411811	0.00379439	0.128199	0.0274198	0.0133884	0.0269268
6	rs198819	0	26232409	G	A	65	rs198819_G	12244.4	12242.4	0.0476905	0.00593257	0.279623	0.034347	0.39513	0.144942	0.0739362	0.0845968
6	rs198816	0	26235163	G	A	66	rs198816_G	12247.8	12245.8	0.0456228	0.00537686	0.271968	0.0319785	0.391642	0.140303	0.0707976	0.0811955
6	rs198811	0	26236425	G	A	67	rs198811_G	12248.3	12245.3	0.0256049	0.0021103	0.164402	0.0112893	0.217262	0.0538572	0.0257259	0.0320709
6	rs198809	0	26236745	G	A	68	rs198809_G	12248.3	12246.3	0.0461527	0.00551993	0.274378	0.0324808	0.394328	0.141877	0.0718409	0.082269
6	rs707899	0	26237927	A	G	69	rs707899_A	12248.3	12248.8	0.223532	0.106677	0.353983	0.217515	0.340867	0.290198	0.254231	0.266644
6	rs198806	0	26241595	A	G	70	rs198806_A	12248.3	12245	0.0215029	0.00182222	0.14631	0.00973481	0.189537	0.0456596	0.0218792	0.0272293
6	rs16891359	0	26256979	G	A	71	rs16891359_G	12247.8	12249.7	0.73595	0.785934	0.583739	0.772419	0.593797	0.686186	0.68147	0.659309
6	rs3857546	0	26265741	A	G	72	rs3857546_A	12248.3	12239	0.000769362	6.87258e-06	0.0300548	3.10103e-05	0.00393425	0.000203329	0.000117139	0.00042052
6	rs7749823	0	26266058	C	A	73	rs7749823_C	12248.3	12239	0.00076639	7.00881e-06	0.0271603	2.70157e-05	0.00362374	0.000180905	9.88258e-05	0.000364323
6	rs9379829	0	26280198	A	G	74	rs9379829_A	12248	12244	0.0141563	0.00246246	0.03025	0.0121239	0.0276731	0.0224504	0.0156387	0.0172651
6	rs9379831	0	26283831	A	C	75	rs9379831_A	12248	12247.3	0.0952672	0.0376304	0.190639	0.0757618	0.159998	0.106103	0.106624	0.121555
6	rs806977	0	26297594	G	A	76	rs806977_G	12248.3	12245.6	0.0300229	0.00307475	0.0472822	0.0134921	0.0240579	0.0210109	0.0227032	0.0400538
6	rs1341758	0	26308497	A	G	77	rs1341758_A	12248.3	12248.7	0.208317	0.149944	0.366103	0.22156	0.267147	0.371493	0.248306	0.231637
6	rs989710	0	26314053	A	C	78	rs989710_A	12248.3	12247.2	0.0789708	0.046617	0.16306	0.073778	0.121674	0.171341	0.0956383	0.0854727
6	rs10946808	0	26341366	G	A	79	rs10946808_G	12244.4	12240.3	0.014103	0.00233206	0.028222	0.00861304	0.017458	0.0087165	0.0102502	0.0142006
6	rs9393691	0	26380808	G	A	80	rs9393691_G	12244.8	12240.2	0.0102092	0.00102393	0.0377856	0.00520224	0.0100084	0.00913159	0.00885718	0.00917524
6	rs9393692	0	26384629	A	G	81	rs9393692_A	12248.3	12246.9	0.0625662	0.00637205	0.093836	0.019294	0.0294402	0.0345558	0.0294193	0.0452625
6	rs6939589	0	26397182	A	G	82	rs6939589_A	12247.9	12247.2	0.101133	0.00776207	0.169699	0.0307543	0.0745392	0.0769371	0.0546415	0.0705097
6	rs9379842	0	26397289	G	A	83	rs9379842_G	12248.3	12243.4	0.00854353	0.000853182	0.0317048	0.00428575	0.00825073	0.00745431	0.00733168	0.00756906
6	rs9379844	0	26399506	A	G	84	rs9379844_A	12244.4	12239.8	0.0101289	0.00101086	0.0366397	0.0050744	0.00979854	0.00881367	0.00860705	0.00886441
6	rs10484439	0	26417887	A	G	85	rs10484439_A	12248.3	12237	0.000266959	3.04934e-09	0.0122464	6.48887e-07	0.0013384	5.54119e-05	1.17544e-05	6.51976e-05
6	rs6923139	0	26421327	A	G	86	rs6923139_A	12248	12239.7	0.0013798	2.1003e-08	0.0508802	7.49206e-06	0.0132679	0.000866855	0.000161677	0.000462488
6	rs9467704	0	26427465	A	G	87	rs9467704_A	12248.3	12240	0.00128015	1.81777e-08	0.0445918	5.51775e-06	0.0118421	0.000733336	0.000123143	0.000365047
6	rs1053860	0	26433207	A	G	88	rs1053860_A	12247.4	12248.8	0.442812	0.954778	0.288564	0.830207	0.239815	0.512942	0.698958	0.59001
6	rs3778279	0	26433442	G	A	89	rs3778279_G	12247.8	12249.2	0.431601	0.96779	0.280437	0.815298	0.231924	0.500692	0.685544	0.577759
6	rs9358927	0	26438471	C	A	90	rs9358927_C	12242.9	12238.3	0.0102111	0.000871065	0.0358178	0.00487495	0.00928542	0.00839224	0.00814812	0.00803564
6	rs2893842	0	26446413	C	A	91	rs2893842_C	12216.1	12211.8	0.0118093	0.00118717	0.0454472	0.00627667	0.0106865	0.00974133	0.0109938	0.00985267
6	rs9366653	0	26462226	A	G	92	rs9366653_A	12248.3	12238.7	0.000658453	2.50645e-08	0.020101	3.39871e-06	0.00223472	0.00014092	4.715e-05	0.000194899
6	rs9379851	0	26462759	C	A	93	rs9379851_C	12246	12236	0.000547365	1.90855e-08	0.0176568	2.67503e-06	0.00188766	0.00011424	3.76865e-05	0.000158572
6	rs6933583	0	26463262	C	A	94	rs6933583_C	12248.3	12241.8	0.00358693	9.00565e-06	0.0369667	0.000252273	0.0125748	0.00323468	0.00131208	0.00107645
6	rs9393705	0	26468990	A	G	95	rs9393705_A	12247.8	12238.3	0.000669313	2.86627e-08	0.0199718	3.37101e-06	0.0022124	0.000141183	4.65673e-05	0.000194225
6	rs4712981	0	26469409	A	G	96	rs4712981_A	12247.8	12241.8	0.00460112	1.40747e-05	0.044499	0.000352341	0.0158068	0.00428196	0.00180312	0.00145108
6	rs9393708	0	26470622	G	A	97	rs9393708_G	12248.3	12238.7	0.000655591	2.76737e-08	0.0196726	3.28402e-06	0.0021671	0.00013754	4.53831e-05	0.000189828
6	rs9379855	0	26472909	G	A	98	rs9379855_G	12213.8	12203.4	0.00044358	1.52317e-08	0.0145212	1.91557e-06	0.00151156	9.31124e-05	2.78824e-05	0.000120847
6	rs9393709	0	26473126	A	G	99	rs9393709_A	12248.3	12249.2	0.290188	0.0243265	0.74884	0.103665	0.5325	0.24692	0.220629	0.187423
6	rs3734536	0	26473325	G	C	100	rs3734536_G	12248.3	12249.3	0.319023	0.0285414	0.795211	0.118117	0.580193	0.276945	0.244244	0.210004
6	rs9379856	0	26474815	C	A	101	rs9379856_C	12232.1	12218.2	6.68741e-05	9.54096e-10	0.00322905	1.60725e-07	0.000239942	1.00049e-05	2.98531e-06	1.49724e-05
6	rs12199613	0	26475197	A	G	102	rs12199613_A	12248.3	12249.3	0.317958	0.0282917	0.797443	0.118668	0.578226	0.275561	0.247312	0.211753
6	rs9379858	0	26475668	G	A	103	rs9379858_G	12248.3	12238.4	0.000543488	2.1161e-08	0.0176878	2.63715e-06	0.00189898	0.000115182	3.85801e-05	0.000162863
6	rs9393710	0	26475812	G	A	104	rs9393710_G	12247.8	12227.5	2.23584e-06	5.65981e-12	0.00027109	2.24061e-09	1.27002e-05	3.12693e-07	7.499e-08	4.60626e-07
6	rs9379859	0	26477528	A	G	105	rs9379859_A	12248.3	12238.4	0.000543488	2.1161e-08	0.0176878	2.63715e-06	0.00189898	0.000115182	3.85801e-05	0.000162863
6	rs12176317	0	26480765	G	A	106	rs12176317_G	12248.3	12238	0.000437658	1.47073e-08	0.0152753	1.86407e-06	0.00151209	8.67241e-05	2.89298e-05	0.00012221
6	rs9393713	0	26481657	A	G	107	rs9393713_A	12248.3	12238.3	0.000538996	2.06264e-08	0.0176238	2.37889e-06	0.00182035	0.000109048	3.61685e-05	0.000152287
6	rs9393714	0	26481719	A	C	108	rs9393714_A	12246.1	12236.1	0.000527283	2.03335e-08	0.0173929	2.33315e-06	0.00177883	0.000105212	3.57928e-05	0.000150946
6	rs9379870	0	26482389	G	A	109	rs9379870_G	12247.8	12241.6	0.00402504	1.1391e-05	0.0399452	0.00027554	0.0135131	0.00355128	0.00146508	0.00119166
6	rs2073529	0	26483138	G	A	110	rs2073529_G	12248.3	12238.4	0.000550827	2.12785e-08	0.0178825	2.42495e-06	0.00187317	0.000111477	3.61909e-05	0.000150627
6	rs1985732	0	26484140	G	A	111	rs1985732_G	12248.3	12240.8	0.00202172	4.76588e-06	0.0224423	0.000151434	0.00645163	0.00157473	0.00067492	0.00057062
6	rs13218591	0	26484811	G	A	112	rs13218591_G	12248.3	12243.5	0.00887607	3.35354e-05	0.0727976	0.000760214	0.0297877	0.00752282	0.00354642	0.00299717
6	rs1977	0	26485525	G	A	113	rs1977_G	12248.3	12238.2	0.000490955	1.65665e-08	0.0164972	2.05154e-06	0.00167843	9.7927e-05	3.17247e-05	0.000135829
6	rs2072806	0	26493072	G	C	114	rs2072806_G	12247.9	12238.5	0.000767648	3.39561e-08	0.0249282	4.23807e-06	0.00261935	0.000148698	5.78157e-05	0.000244356
6	rs3799378	0	26512353	G	A	115	rs3799378_G	12246.7	12239.1	0.00195235	9.0155e-06	0.035401	0.000149234	0.00532397	0.00137018	0.000749323	0.0011908
6	rs55676749	0	26513795	G	A	116	rs55676749_G	12248.3	12249.7	0.437161	0.361319	0.455306	0.414485	0.30976	0.339179	0.426305	0.386952
6	rs3799380	0	26575161	G	A	117	rs3799380_G	12248.3	12244	0.012094	1.10464e-05	0.119074	0.00061715	0.0373649	0.00393394	0.00301626	0.00648992
6	rs9366658	0	26577845	A	G	118	rs9366658_A	12248.3	12245.5	0.0277885	4.27101e-05	0.199209	0.00161726	0.0710119	0.00929976	0.00737944	0.0157778
6	rs9358944	0	26577854	C	A	119	rs9358944_C	12248.3	12245.5	0.0277885	4.27101e-05	0.199209	0.00161726	0.0710119	0.00929976	0.00737944	0.0157778
6	rs9358945	0	26580093	G	A	120	rs9358945_G	12248.3	12245.5	0.0282701	4.54327e-05	0.202159	0.0016665	0.072419	0.00958261	0.00760906	0.016176
6	rs7773938	0	26582023	A	G	121	rs7773938_A	12247.8	12245.1	0.029201	4.84602e-05	0.206482	0.00173885	0.0742418	0.0099281	0.00783937	0.0166896
6	rs6456728	0	26585758	A	G	122	rs6456728_A	12247.7	12243.2	0.0109089	9.38045e-06	0.111735	0.000542463	0.0345215	0.0035521	0.00271562	0.00590475
6	rs9358946	0	26586906	A	G	123	rs9358946_A	12247.5	12244.7	0.0292523	4.88366e-05	0.207829	0.00174874	0.0750793	0.0100341	0.0078962	0.0168248
6	rs16891725	0	26587129	A	G	124	rs16891725_A	12248.3	12236.9	0.000248493	4.87313e-09	0.0110993	8.88165e-07	0.00105486	4.32711e-05	1.57419e-05	7.38398e-05
6	rs7756567	0	26589621	C	A	125	rs7756567_C	12246.5	12243.7	0.0281133	4.55751e-05	0.2024	0.00164681	0.0722182	0.00955276	0.00753717	0.0161334
6	rs2093169	0	26603078	A	G	126	rs2093169_A	12241.7	12238.9	0.0290962	5.12743e-05	0.206331	0.00168597	0.0744595	0.00997905	0.00779404	0.0166722
6	rs13194984	0	26608542	A	C	127	rs13194984_A	12248.3	12249.7	0.444712	0.567624	0.978141	0.427737	0.78887	0.554078	0.650158	0.436643
6	rs3799383	0	26618727	A	G	128	rs3799383_A	12237.8	12226.1	0.000217625	3.51011e-09	0.0100524	8.29502e-07	0.000981694	4.72628e-05	1.38631e-05	6.37155e-05
6	rs6920256	0	26645780	A	G	129	rs6920256_A	12248.3	12234.5	6.78734e-05	7.42984e-10	0.00400972	1.71294e-07	0.000316232	1.24746e-05	3.33623e-06	1.75377e-05
6	rs9379892	0	26690393	G	A	130	rs9379892_G	12248.3	12246.3	0.0454596	0.0202361	0.0961199	0.0297499	0.085842	0.0856644	0.0428961	0.0645065
6	rs4634439	0	26705983	G	A	131	rs4634439_G	12248.3	12237.5	0.000339298	5.09755e-09	0.0146	1.44079e-06	0.00135899	9.09395e-05	2.69957e-05	0.000125509
6	rs7768682	0	26706397	A	T	132	rs7768682_A	12248.3	12248.2	0.14525	0.118462	0.0973797	0.0991515	0.0652927	0.105553	0.0881381	0.101845
6	rs9379897	0	26709505	G	A	133	rs9379897_G	12247.8	12237	0.000332647	5.00831e-09	0.014412	1.42378e-06	0.00134812	9.05883e-05	2.6787e-05	0.000124624
6	rs2451731	0	26732801	C	A	134	rs2451731_C	12248.3	12250.1	0.632535	0.206932	0.888146	0.441017	0.742255	0.391594	0.58725	0.511489
6	rs2451741	0	26737383	G	A	135	rs2451741_G	12247.7	12249.5	0.623555	0.202903	0.896672	0.433269	0.733608	0.38509	0.577862	0.503178
6	rs71557344	0	26745703	G	A	136	rs71557344_G	12247.8	12230.5	1.09486e-05	6.94158e-12	0.00197758	6.11462e-09	0.000112771	1.90926e-06	4.1608e-07	3.43984e-06
6	rs2494711	0	26757400	A	G	137	rs2494711_A	12248.3	12249.4	0.335215	0.116869	0.446245	0.184583	0.490663	0.455485	0.237403	0.39253
6	rs9467847	0	26817570	G	A	138	rs9467847_G	12248.3	12249	0.245002	0.088691	0.159738	0.126284	0.164554	0.229783	0.101272	0.172438
6	rs9467871	0	26849124	A	G	139	rs9467871_A	12245.6	12244.7	0.0878536	0.0692881	0.112027	0.101433	0.120484	0.0961324	0.101481	0.104037
6	rs9393777	0	27050006	G	A	140	rs9393777_G	12248.3	12244.1	0.0129459	5.94466e-06	0.163953	0.000307906	0.0317706	0.00313689	0.00196298	0.00493591
6	rs13194491	0	27145059	A	G	141	rs13194491_A	12245.3	12246.1	0.278339	0.182306	0.0581219	0.248773	0.045577	0.3107	0.113733	0.197981
6	rs6916301	0	27150237	A	G	142	rs6916301_A	12248.3	12250.2	0.760675	0.918706	0.723149	0.759092	0.541336	0.699602	0.729258	0.940622
6	rs6904071	0	27155235	A	G	143	rs6904071_A	12247.8	12243.1	0.00964038	1.02169e-05	0.11007	0.000535256	0.0344275	0.0053939	0.00327918	0.00824459
6	rs7745603	0	27198383	A	G	144	rs7745603_A	12248.3	12244.2	0.0136287	1.30654e-05	0.14001	0.000928933	0.0611122	0.00991442	0.00471711	0.00647438
6	rs6913660	0	27199404	A	C	145	rs6913660_A	12248.3	12243.6	0.0093721	9.46262e-06	0.108027	0.000512837	0.033386	0.00522293	0.00316102	0.00798332
6	rs1321578	0	27212762	C	A	146	rs1321578_C	12245.2	12247.1	0.813487	0.354844	0.918883	0.74558	0.953374	0.894333	0.672415	0.739486
6	rs7749319	0	27234439	A	G	147	rs7749319_A	12248.3	12250.3	0.995592	0.490116	0.885986	0.929785	0.767186	0.922371	0.850996	0.923794
6	rs13194053	0	27251862	G	A	148	rs13194053_G	12245.3	12239.3	0.00485931	3.48439e-06	0.0698126	0.00023061	0.0196995	0.00273724	0.00160077	0.00442111
6	rs911186	0	27258578	G	A	149	rs911186_G	12218.1	12214.5	0.0184986	2.3618e-05	0.186718	0.00160579	0.0861809	0.0152595	0.00794128	0.0116838
6	rs13219354	0	27293643	G	A	150	rs13219354_G	12244.8	12233.1	0.000204622	2.66587e-09	0.0145099	1.48192e-06	0.0014339	0.000114956	3.03872e-05	0.000146726
6	rs3800307	0	27293771	T	A	151	rs3800307_T	12247.8	12242	0.00504012	6.19644e-06	0.0585156	0.000271237	0.0165775	0.0020191	0.00149763	0.00310036
6	rs4452638	0	27337244	A	G	152	rs4452638_A	12248.3	12236.9	0.00024551	4.01572e-09	0.0158781	1.59718e-06	0.00157716	0.000129076	3.20051e-05	0.000152591
6	rs11758636	0	27337540	A	G	153	rs11758636_A	12247.7	12249.5	0.680511	0.83817	0.435291	0.694586	0.411189	0.521985	0.578183	0.852657
6	rs6938200	0	27339129	G	A	154	rs6938200_G	12246.1	12241.7	0.0110441	2.33952e-05	0.0998883	0.000654659	0.0344808	0.00502939	0.00311729	0.00640437
6	rs6932590	0	27356910	G	A	155	rs6932590_G	12247.6	12241.6	0.00469975	3.76368e-05	0.0677649	0.000298095	0.0274193	0.00208359	0.00108384	0.00188733
6	rs3800316	0	27364081	C	A	156	rs3800316_C	12247.8	12240.8	0.00261582	2.77981e-05	0.0671878	0.000190272	0.0290613	0.00188543	0.000823958	0.0014304
6	rs7746199	0	27369303	A	G	157	rs7746199_A	12247.2	12240.3	0.00274706	4.39073e-05	0.0724751	8.24069e-05	0.018442	0.000882497	0.000382951	0.00131473
6	rs4559087	0	27374987	A	G	158	rs4559087_A	12248.3	12249.2	0.281913	0.0886652	0.907799	0.17565	0.821844	0.263378	0.277208	0.317197
6	rs7771953	0	27379322	A	G	159	rs7771953_A	12247.8	12248.1	0.189003	0.0562863	0.871217	0.0894016	0.627502	0.173569	0.154999	0.184212
6	rs2235233	0	27387831	G	A	160	rs2235233_G	12247.8	12249.4	0.510337	0.239705	0.798992	0.349126	0.361262	0.278074	0.31665	0.226414
6	rs2893910	0	27391233	A	T	161	rs2893910_A	12248.3	12241.5	0.00302204	4.74461e-05	0.0749714	8.91439e-05	0.0191311	0.000955583	0.000401324	0.00135535
6	rs6923811	0	27397755	G	A	162	rs6923811_G	12244.5	12241.2	0.020351	0.00120508	0.3209	0.00385475	0.160168	0.0163476	0.01228	0.0165399
6	rs9368501	0	27403061	G	A	163	rs9368501_G	12248.3	12248.2	0.145852	0.0431073	0.734374	0.0655379	0.513902	0.114526	0.112107	0.130101
6	rs9461357	0	27404491	A	G	164	rs9461357_A	12247.9	12249.8	0.712652	0.459584	0.389919	0.373006	0.470623	0.488049	0.316986	0.413367
6	rs17739310	0	27404754	A	G	165	rs17739310_A	12234.9	12236.6	0.644354	0.412267	0.342879	0.324055	0.418287	0.437108	0.27351	0.362533
6	rs721600	0	27406884	A	G	166	rs721600_A	12237.7	12238.4	0.255024	0.083492	0.183216	0.108542	0.159858	0.191342	0.115672	0.144127
6	rs9461362	0	27411906	A	G	167	rs9461362_A	12248.3	12250.3	0.858074	0.619113	0.554285	0.476346	0.586693	0.621879	0.452769	0.565115
6	rs7744655	0	27492048	A	G	168	rs7744655_A	12246.3	12247.7	0.435817	0.0914532	0.610295	0.233526	0.921748	0.853421	0.364244	0.245479
6	rs13195040	0	27521903	G	A	169	rs13195040_G	12248.3	12237.1	0.00027916	3.79142e-10	0.0199608	2.69922e-07	0.00174952	4.64043e-05	1.16932e-05	7.66832e-05
6	rs7749305	0	27554545	G	A	170	rs7749305_G	12248.3	12236	0.000153413	3.61026e-11	0.0148256	7.69815e-08	0.0026584	6.07951e-05	5.62923e-06	2.50734e-05
6	rs6931577	0	27584306	A	C	171	rs6931577_A	12248.3	12250	0.554414	0.534026	0.640191	0.623049	0.540338	0.342076	0.4211	0.500878
6	rs6904596	0	27599278	A	G	172	rs6904596_A	12247.8	12238.6	0.000786311	2.64871e-10	0.0501361	6.51435e-07	0.0114566	0.00041607	3.8191e-05	0.000161029
6	rs9468152	0	27600885	C	A	173	rs9468152_C	12239.9	12241	0.334693	0.328875	0.264487	0.151667	0.242142	0.23561	0.18871	0.209338
6	rs2064092	0	27619350	A	C	174	rs2064092_A	12248.3	12250.3	0.884446	0.965365	0.877877	0.660108	0.927229	0.893948	0.780385	0.853981
6	rs6934794	0	27627324	A	G	175	rs6934794_A	12247.8	12249.5	0.59681	0.720869	0.604122	0.344365	0.763575	0.61535	0.344265	0.477497
6	rs9468159	0	27630353	A	G	176	rs9468159_A	12247	12248.9	0.737397	0.693213	0.522017	0.353057	0.543835	0.484099	0.402853	0.456279
6	rs10484399	0	27642507	G	A	177	rs10484399_G	12248.3	12239.8	0.00120227	2.25429e-09	0.0608081	2.53177e-06	0.00728384	0.000243429	6.38754e-05	0.000399457
6	rs10946938	0	27658775	C	A	178	rs10946938_C	12244.2	12245.8	0.555924	0.737203	0.459973	0.378061	0.552063	0.4633	0.290128	0.525207
6	rs13217599	0	27694209	G	A	179	rs13217599_G	12247.9	12247.7	0.134403	0.0819728	0.0179336	0.136435	0.0128696	0.163983	0.0492774	0.0987756
6	rs16867901	0	27764055	A	G	180	rs16867901_A	12248.3	12249.4	0.337345	0.0537234	0.498508	0.137647	0.999165	0.824752	0.247343	0.140748
6	rs16867911	0	27770183	A	C	181	rs16867911_A	12248.3	12249.5	0.363837	0.063489	0.52774	0.151684	0.962845	0.856094	0.268975	0.154476
6	rs9295739	0	27770374	A	G	182	rs9295739_A	12248.3	12249.4	0.337345	0.0537234	0.498508	0.137647	0.999165	0.824752	0.247343	0.140748
6	rs2393997	0	27778676	A	C	183	rs2393997_A	12248.3	12250.2	0.745456	0.600478	0.618144	0.918516	0.684922	0.821939	0.877649	0.875445
6	rs9380010	0	27791551	G	A	184	rs9380010_G	12248.3	12246.3	0.0450202	3.20717e-05	0.374708	0.00517664	0.205419	0.0426441	0.0193641	0.0315456
6	rs9393848	0	27796348	A	G	185	rs9393848_A	12248.3	12246.1	0.0406431	2.57931e-05	0.352929	0.00450913	0.192166	0.0385172	0.0172622	0.0283231
6	rs9468202	0	27796609	G	A	186	rs9468202_G	12248.3	12248.7	0.204793	0.0323489	0.32087	0.0752464	0.735419	0.57928	0.148676	0.0791148
6	rs9468203	0	27796646	G	A	187	rs9468203_G	12246.1	12243.7	0.0364571	2.08741e-05	0.331223	0.00387275	0.177179	0.0346162	0.0153152	0.0254708
6	rs9295740	0	27797481	A	G	188	rs9295740_A	12246.5	12239	0.00213457	2.83174e-08	0.0636824	4.87365e-05	0.0191598	0.00190737	0.000446176	0.000883218
6	rs17750424	0	27809101	G	A	189	rs17750424_G	12205.1	12191.5	7.52119e-05	1.94759e-11	0.00887544	5.79166e-08	0.000600474	1.09174e-05	2.11433e-06	1.85237e-05
6	rs17693963	0	27818144	C	A	190	rs17693963_C	12248.3	12239.2	0.000847924	1.29099e-09	0.0457793	2.03614e-06	0.00551372	0.000203654	4.69098e-05	0.00030881
6	rs4713119	0	27820804	G	A	191	rs4713119_G	12248	12249.8	0.672195	0.655471	0.550404	0.980918	0.760604	0.887176	0.946033	0.942919
6	rs6901520	0	27822554	A	C	192	rs6901520_A	12247.8	12244.8	0.0242411	1.16562e-05	0.251286	0.00249211	0.125651	0.0209517	0.00907122	0.0156515
6	rs9283880	0	27823222	C	A	193	rs9283880_C	12248.3	12244.8	0.0185611	6.96301e-06	0.209813	0.00177186	0.100809	0.0158996	0.00660516	0.0116418
6	rs9461405	0	27827354	A	C	194	rs9461405_A	12248.3	12245	0.0209637	8.74129e-06	0.228924	0.00208905	0.11232	0.0178876	0.00748944	0.0131085
6	rs9461406	0	27827743	G	A	195	rs9461406_G	12248	12246.7	0.069767	0.000121637	0.455326	0.0140346	0.201371	0.0473826	0.035162	0.0672237
6	rs7776351	0	27834710	A	G	196	rs7776351_A	12247.8	12244.8	0.0244402	1.01092e-05	0.253449	0.0025617	0.126285	0.0213417	0.00894029	0.0155958
6	rs9295746	0	27838043	G	A	197	rs9295746_G	12244.7	12243.7	0.08517	0.000171972	0.513935	0.0178744	0.238584	0.059194	0.0435366	0.0822096
6	rs7759217	0	27838442	G	A	198	rs7759217_G	12247.1	12242	0.00750836	1.42143e-06	0.114544	0.000416777	0.0510688	0.0068808	0.00185345	0.00334244
6	rs9468220	0	27840955	A	G	199	rs9468220_A	12248.3	12245.6	0.0298436	2.75419e-05	0.261195	0.00358029	0.101788	0.0202251	0.0106478	0.0217891
6	rs742046	0	27847233	G	A	200	rs742046_G	12248	12242.8	0.00760138	1.46749e-06	0.113511	0.000409971	0.0512847	0.00706985	0.00182523	0.00327146
6	rs742047	0	27847359	G	A	201	rs742047_G	12248.3	12245.7	0.0312589	2.94724e-05	0.267007	0.00366521	0.105379	0.0216011	0.0110226	0.0225952
6	rs6915101	0	27849661	A	G	202	rs6915101_A	12231.6	12229.8	0.0517445	0.012683	0.0791152	0.0183248	0.193584	0.1169	0.0270102	0.0131359
6	rs9468226	0	27854157	G	A	203	rs9468226_G	12248.3	12248.9	0.226892	0.193757	0.303814	0.352855	0.348849	0.42226	0.356277	0.310176
6	rs9468227	0	27854321	G	A	204	rs9468227_G	12248.3	12246.7	0.056489	0.0120487	0.0887854	0.0205634	0.217766	0.134273	0.0307026	0.0152512
6	rs10484401	0	27854569	A	T	205	rs10484401_A	12247.5	12244.4	0.0229779	1.73273e-05	0.21369	0.00241528	0.0824893	0.0153049	0.00729068	0.0152976
6	rs9295749	0	27875374	A	G	206	rs9295749_A	12247.8	12249.3	0.479316	0.439981	0.538723	0.707302	0.54886	0.663422	0.61915	0.494746
6	rs9461412	0	27879633	G	A	207	rs9461412_G	12241.3	12242.1	0.26672	0.229849	0.347646	0.40299	0.397345	0.476892	0.405907	0.358227
6	rs200483	0	27882803	A	G	208	rs200483_A	12248.3	12235.8	0.000137342	2.15504e-11	0.015411	6.98678e-08	0.00272694	6.66335e-05	5.35468e-06	2.13468e-05
6	rs200484	0	27883653	G	A	209	rs200484_G	12240.5	12228.1	0.000145235	2.26034e-11	0.016147	7.22492e-08	0.00285074	7.11761e-05	5.61751e-06	2.21108e-05
6	rs370155	0	27890010	C	A	210	rs370155_C	12248.3	12236.5	0.000196332	4.01321e-11	0.0194232	1.16339e-07	0.00360936	9.58114e-05	8.12974e-06	3.16902e-05
6	rs2747054	0	27891338	G	A	211	rs2747054_G	12248.3	12235.5	0.000116147	1.70001e-11	0.0137707	5.63636e-08	0.00244764	5.78453e-05	4.46345e-06	1.80043e-05
6	rs200501	0	27896921	A	G	212	rs200501_A	12248.3	12235	9.09938e-05	1.16245e-11	0.0104706	3.78512e-08	0.00176709	3.91058e-05	2.97585e-06	1.22434e-05
6	rs200490	0	27904914	A	C	213	rs200490_A	12248.3	12236.3	0.000177272	3.11106e-11	0.0183829	1.00746e-07	0.00336693	8.74621e-05	7.28319e-06	2.85067e-05
6	rs201004	0	27912913	G	A	214	rs201004_G	12241.5	12231.2	0.000466687	1.15481e-09	0.0190008	4.05654e-06	0.005752	0.000686566	5.55808e-05	0.000120361
6	rs34706883	0	27913234	C	A	215	rs34706883_C	12248.3	12240.5	0.00170944	3.34777e-09	0.0762855	3.83397e-06	0.00961483	0.000342133	9.21438e-05	0.000566504
6	rs13212651	0	27914964	G	A	216	rs13212651_G	12248.3	12240.3	0.0015151	2.72338e-09	0.0706462	3.20545e-06	0.0087193	0.000297596	7.85648e-05	0.000492357
6	rs201002	0	27916171	G	A	217	rs201002_G	12247.7	12236	0.000203921	3.81463e-11	0.0200785	1.17377e-07	0.00376024	0.000100917	8.34173e-06	3.22563e-05
6	rs175597	0	27918605	G	A	218	rs175597_G	12248.3	12235.9	0.000146368	2.25805e-11	0.0163106	7.85139e-08	0.00296165	7.3458e-05	5.91539e-06	2.35562e-05
6	rs200995	0	27921673	G	A	219	rs200995_G	12248.3	12235.6	0.000122294	1.74712e-11	0.0146337	6.35994e-08	0.00257265	6.12134e-05	5.00254e-06	2.01072e-05
6	rs200994	0	27921792	A	C	220	rs200994_A	12247.3	12244.8	0.0324949	1.03179e-05	0.265874	0.00144205	0.130829	0.022032	0.00655963	0.0124105
6	rs200991	0	27923473	A	C	221	rs200991_A	12247.8	12238.9	0.000950815	1.81939e-09	0.0332702	3.62262e-06	0.008222	0.000650569	7.25215e-05	0.00018174
6	rs13194781	0	27923618	G	A	222	rs13194781_G	12245	12236.6	0.0012457	2.03692e-09	0.0631814	2.50771e-06	0.00738548	0.000241459	6.44406e-05	0.000410797
6	rs200990	0	27923802	C	A	223	rs200990_C	12247.8	12235.5	0.00015306	2.60387e-11	0.0168585	8.39439e-08	0.00306056	7.63507e-05	6.34255e-06	2.50901e-05
6	rs200989	0	27924421	G	A	224	rs200989_G	12248.3	12235.5	0.000118947	1.69232e-11	0.0144123	6.03945e-08	0.00257263	6.03231e-05	4.81928e-06	1.95008e-05
6	rs13199772	0	27942064	G	A	225	rs13199772_G	12248.3	12240	0.00134258	2.34323e-09	0.0656017	2.74781e-06	0.00793009	0.000261462	6.9852e-05	0.000442496
6	rs200948	0	27943251	G	A	226	rs200948_G	12248.3	12236.1	0.000165132	2.93743e-11	0.0176331	9.30477e-08	0.00320876	7.94394e-05	6.80747e-06	2.63458e-05
6	rs200953	0	27945246	G	A	227	rs200953_G	12248.3	12236.3	0.000177922	3.37237e-11	0.0184817	1.01834e-07	0.00338499	8.53389e-05	7.41512e-06	2.85985e-05
6	rs200956	0	27947725	G	A	228	rs200956_G	12248.3	12242.7	0.00566454	5.02655e-08	0.112212	7.10575e-05	0.0342701	0.00364958	0.000862546	0.00201058
6	rs13219787	0	27969649	A	G	229	rs13219787_A	12248.3	12248.4	0.169373	0.107086	0.0213748	0.165031	0.0147462	0.19192	0.0593927	0.118279
6	rs13218875	0	27991991	A	G	230	rs13218875_A	12248.3	12239.8	0.00116471	9.59251e-10	0.0673781	1.37221e-06	0.00720594	0.000225288	5.28054e-05	0.000345444
6	rs156737	0	28003192	G	A	231	rs156737_G	12248	12248.9	0.292136	0.0142145	0.947329	0.0614642	0.566116	0.20891	0.111036	0.153631
6	rs6910968	0	28012160	A	G	232	rs6910968_A	12248.3	12250.3	0.933578	0.306337	0.531109	0.711022	0.7288	0.924528	0.84273	0.916475
6	rs276371	0	28018687	T	A	233	rs276371_T	12247.8	12248.7	0.292473	0.013604	0.940384	0.0608597	0.556861	0.204874	0.108469	0.148541
6	rs149966	0	28063266	G	C	234	rs149966_G	12248.3	12247.9	0.120396	0.507355	0.0712408	0.123678	0.0509689	0.0994473	0.152599	0.112167
6	rs149898	0	28066051	A	G	235	rs149898_A	12246.9	12248.6	0.605476	0.131683	0.790685	0.280039	0.65101	0.835406	0.47362	0.267408
6	rs156742	0	28071171	A	G	236	rs156742_A	12248.3	12248.8	0.219139	0.0346126	0.340987	0.0786733	0.78286	0.619011	0.167811	0.0854105
6	rs149901	0	28073482	A	G	237	rs149901_A	12248.3	12249.6	0.393299	0.00200126	0.904208	0.0610841	0.826286	0.333647	0.167177	0.265081
6	rs156743	0	28075068	G	A	238	rs156743_G	12247.7	12242.7	0.00819238	7.65217e-08	0.161008	2.10246e-05	0.0557066	0.00462827	0.000537	0.00156363
6	rs149970	0	28088199	A	G	239	rs149970_A	12246.1	12247.4	0.399571	0.00205868	0.895843	0.0630859	0.834789	0.341265	0.171049	0.269287
6	rs149971	0	28090131	A	G	240	rs149971_A	12243.4	12244.5	0.348589	0.0335027	0.89634	0.0751743	0.521479	0.173498	0.108301	0.150027
6	rs149974	0	28093075	G	A	241	rs149974_G	12244.8	12246	0.399236	0.0424942	0.967612	0.0919095	0.577119	0.202846	0.12883	0.177593
6	rs149976	0	28095755	G	A	242	rs149976_G	12248.3	12249.7	0.42643	0.0484078	0.99609	0.101396	0.607879	0.221036	0.143098	0.196759
6	rs149990	0	28106237	A	G	243	rs149990_A	12247.8	12242.5	0.00689573	5.6783e-08	0.147747	1.65634e-05	0.0498633	0.00393699	0.000434538	0.00129493
6	rs149943	0	28110367	A	G	244	rs149943_A	12241.8	12236	0.00518079	4.24637e-08	0.12642	1.30618e-05	0.0434397	0.00331772	0.000343228	0.0010414
6	rs202906	0	28119631	G	A	245	rs202906_G	12247.8	12244	0.0159804	2.67536e-07	0.248912	7.27308e-05	0.0947491	0.00975741	0.00137878	0.00358306
6	rs203878	0	28156975	C	A	246	rs203878_C	12243.4	12243.9	0.214737	0.021336	0.653437	0.047843	0.309022	0.117533	0.0614924	0.0927076
6	rs10484404	0	28163474	A	G	247	rs10484404_A	12248.3	12250.1	0.617345	0.482769	0.957384	0.882654	0.718688	0.729746	0.738267	0.665335
6	rs13197574	0	28168218	G	A	248	rs13197574_G	12248.3	12239.6	0.00107508	8.70649e-10	0.0656093	1.26393e-06	0.00698954	0.000218162	5.08372e-05	0.000331535
6	rs9468287	0	28187720	A	C	249	rs9468287_A	12247.9	12243.9	0.0142371	5.70324e-07	0.198402	0.000127508	0.0460307	0.00587803	0.00150361	0.00553396
6	rs4713139	0	28200664	A	G	250	rs4713139_A	12248.3	12243.8	0.0104967	3.20922e-07	0.164642	9.66598e-05	0.0380371	0.00428203	0.00105281	0.00407402
6	rs4713140	0	28205172	A	G	251	rs4713140_A	12247.7	12243.2	0.0104349	3.19969e-07	0.163924	9.6625e-05	0.0378298	0.00426119	0.00105084	0.004064
6	rs1225710	0	28208619	G	A	252	rs1225710_G	12247.6	12248.2	0.243725	0.0256039	0.700703	0.0568817	0.343624	0.134738	0.0710326	0.105809
6	rs3757188	0	28215336	G	A	253	rs3757188_G	12247.8	12243.3	0.0106323	3.2899e-07	0.166118	9.83196e-05	0.0385371	0.00435715	0.00107175	0.00413653
6	rs1225715	0	28221352	G	A	254	rs1225715_G	12248.3	12249.2	0.300228	0.038402	0.808614	0.0784582	0.420956	0.173749	0.0975228	0.142538
6	rs13205911	0	28232093	A	G	255	rs13205911_A	12248.3	12239.3	0.00091602	6.70127e-10	0.0596336	1.00349e-06	0.00608798	0.000182433	4.23375e-05	0.000279819
6	rs1225618	0	28237692	C	A	256	rs1225618_C	12236.7	12237.2	0.233315	0.025363	0.695839	0.0543207	0.339044	0.130334	0.0695137	0.104295
6	rs9380064	0	28251097	G	A	257	rs9380064_G	12247.8	12243.2	0.00976892	2.86212e-07	0.158318	8.7246e-05	0.0359167	0.00397352	0.000973827	0.00378051
6	rs2622315	0	28260546	A	G	258	rs2622315_A	12248.3	12249.6	0.39866	0.734218	0.70554	0.610644	0.500569	0.5027	0.496017	0.438564
6	rs1233704	0	28274902	A	G	259	rs1233704_A	12244.5	12245.9	0.418396	0.00474109	0.893969	0.0960266	0.713962	0.252528	0.18449	0.320487
6	rs1233701	0	28276705	C	G	260	rs1233701_C	12248.3	12249.6	0.411341	0.00458123	0.899918	0.0935338	0.706914	0.247358	0.18144	0.317431
6	rs1233699	0	28277137	T	A	261	rs1233699_T	12247.8	12249.2	0.421917	0.0048552	0.884312	0.0980528	0.718018	0.253479	0.188351	0.326604
6	rs735765	0	28278276	A	G	262	rs735765_A	12241.4	12235.8	0.00599233	1.89257e-07	0.123326	5.20936e-05	0.0246161	0.00231959	0.000518942	0.00224415
6	rs1237875	0	28280989	A	G	263	rs1237875_A	12247.8	12249.2	0.418861	0.00476808	0.890543	0.0968144	0.71201	0.250445	0.185951	0.323172
6	rs1736891	0	28295080	A	C	264	rs1736891_A	12247.5	12247.3	0.135741	0.0134404	0.479564	0.0226698	0.2055	0.0714623	0.035672	0.055508
6	rs9393908	0	28298809	A	T	265	rs9393908_A	12245.6	12240.9	0.00979682	3.13888e-07	0.16305	7.20802e-05	0.0361844	0.00435791	0.00107834	0.00400136
6	rs9366717	0	28299036	A	G	266	rs9366717_A	12248.3	12243.7	0.00982266	3.09034e-07	0.16231	7.16918e-05	0.0358102	0.00428026	0.0010544	0.00394176
6	rs1150707	0	28305584	A	G	267	rs1150707_A	12238.6	12238.5	0.141081	0.0145722	0.496805	0.0242658	0.21347	0.0753094	0.0386207	0.0598054
6	rs9468317	0	28306435	G	A	268	rs9468317_G	12248.3	12242.6	0.00532899	4.6363e-07	0.0456819	6.0283e-05	0.00581711	0.00118539	0.000334515	0.00107384
6	rs7206	0	28309117	G	A	269	rs7206_G	12245.6	12245.5	0.147885	0.0154473	0.510466	0.0255412	0.223947	0.080337	0.039898	0.0620911
6	rs9380069	0	28311279	G	A	270	rs9380069_G	12248.3	12244.6	0.0170557	9.79015e-07	0.22915	0.000182314	0.0542594	0.00774078	0.00222994	0.00721226
6	rs1150711	0	28316514	G	A	271	rs1150711_G	12244.8	12239.8	0.0080457	0.000202138	0.0590202	0.000300699	0.0124924	0.00317666	0.000617516	0.00108368
6	rs9295768	0	28317081	A	G	272	rs9295768_A	12247.5	12241.6	0.00482368	3.87946e-07	0.0419319	5.33318e-05	0.00523795	0.0010543	0.000296672	0.000958489
6	rs967005	0	28318667	A	G	273	rs967005_A	12238.4	12231.7	0.0032255	1.94191e-07	0.031791	2.96124e-05	0.00366193	0.000633721	0.000179893	0.000604542
6	rs13408	0	28320727	A	G	274	rs13408_A	12247.4	12246.8	0.10697	0.00604776	0.412758	0.0156426	0.180083	0.0487546	0.0279786	0.0329101
6	rs1233710	0	28323425	A	G	275	rs1233710_A	12246.8	12246.2	0.107006	0.0871993	0.0427373	0.0978142	0.0249225	0.0616252	0.0629909	0.0566855
6	rs2235359	0	28323620	C	A	276	rs2235359_C	12248.3	12249.8	0.462222	0.883197	0.682594	0.496948	0.714766	0.622845	0.495463	0.315618
6	rs1736895	0	28327805	A	G	277	rs1736895_A	12248.3	12247.6	0.101645	0.00583916	0.399926	0.0151213	0.1729	0.0475408	0.0267774	0.0313492
6	rs10456362	0	28329795	A	G	278	rs10456362_A	12246.7	12240	0.0031193	7.13583e-08	0.0728714	1.96473e-05	0.0124299	0.00105015	0.000227257	0.000940976
6	rs12214383	0	28331710	A	G	279	rs12214383_A	12243.2	12242.5	0.10623	0.00629172	0.412542	0.0161555	0.178129	0.0494171	0.028125	0.0328823
6	rs1531681	0	28334857	G	A	280	rs1531681_G	12219.5	12218.5	0.0853533	0.00442032	0.361926	0.0121155	0.153321	0.0407011	0.0221189	0.0259721
6	rs1778508	0	28337860	G	A	281	rs1778508_G	12248.3	12241.3	0.00269672	5.9363e-08	0.0673075	1.65106e-05	0.0113191	0.000942246	0.000195882	0.000789817
6	rs2799077	0	28342576	A	G	282	rs2799077_A	12248.3	12241.3	0.0027038	5.88612e-08	0.0665316	1.66326e-05	0.0111449	0.000943353	0.000195581	0.00078916
6	rs11965538	0	28347894	A	G	283	rs11965538_A	12243.4	12236.4	0.00259659	5.42752e-08	0.0642171	1.54788e-05	0.0105421	0.000882041	0.000182787	0.000739033
6	rs1778484	0	28348777	G	A	284	rs1778484_G	12248.3	12241.9	0.00371042	1.3501e-05	0.0506891	0.000157183	0.0108009	0.00205929	0.000547238	0.000618314
6	rs1419183	0	28350773	C	A	285	rs1419183_C	12248.3	12241.2	0.00254275	5.18673e-08	0.0643396	1.52442e-05	0.0106261	0.000893483	0.000186013	0.000756121
6	rs1150726	0	28351021	A	G	286	rs1150726_A	12247.4	12241	0.00383825	1.40632e-05	0.0516101	0.000160918	0.0110185	0.00210925	0.000556664	0.000628581
6	rs1150724	0	28358215	A	G	287	rs1150724_A	12247.4	12241.2	0.00428981	1.63921e-05	0.0569709	0.00019075	0.0124765	0.00243287	0.000664135	0.000747053
6	rs6901575	0	28358963	A	G	288	rs6901575_A	12248	12241.5	0.00356336	8.7018e-08	0.080301	2.53046e-05	0.0143469	0.00133466	0.000282039	0.00111259
6	rs13211507	0	28365356	G	A	289	rs13211507_G	12248.3	12238.5	0.000592935	3.6453e-10	0.0465218	5.72685e-07	0.00443866	0.00012622	2.77396e-05	0.000176798
6	rs1997660	0	28377642	G	A	290	rs1997660_G	12247.8	12242	0.00500027	3.42406e-05	0.0647573	0.000270047	0.01316	0.00329856	0.00071336	0.00131411
6	rs9468333	0	28379177	A	G	291	rs9468333_A	12247.8	12242.1	0.00532001	3.69448e-05	0.0678853	0.000292233	0.014	0.00355643	0.000777768	0.00142303
6	rs16893947	0	28392700	G	A	292	rs16893947_G	12243.7	12245.2	0.504836	0.967833	0.539005	0.610183	0.481863	0.577247	0.49792	0.414517
6	rs853690	0	28393461	A	G	293	rs853690_A	12247.6	12242	0.00613341	4.36137e-05	0.0751424	0.000345728	0.0159178	0.00412395	0.000911987	0.00166151
6	rs853685	0	28396764	A	G	294	rs853685_A	12248.3	12242.3	0.00453144	1.0793e-07	0.103704	3.98099e-05	0.0184357	0.00186178	0.000399578	0.0015736
6	rs707907	0	28399219	G	A	295	rs707907_G	12247.8	12242.3	0.00585882	4.14114e-05	0.0734613	0.000334461	0.0155006	0.0039968	0.000885253	0.00161422
6	rs9301	0	28400685	G	A	296	rs9301_G	12240.5	12240.2	0.135231	0.012075	0.494152	0.0244122	0.215614	0.0746847	0.0361885	0.0584375
6	rs853684	0	28402529	G	A	297	rs853684_G	12247	12246.9	0.154849	0.014698	0.536883	0.0291363	0.2408	0.0860615	0.0429966	0.0678746
6	rs853683	0	28403018	G	A	298	rs853683_G	12248.3	12242.8	0.00599972	4.27883e-05	0.0744373	0.000342859	0.0157799	0.00406917	0.000905124	0.00165227
6	rs16893970	0	28407274	G	A	299	rs16893970_G	12248.3	12249.9	0.536745	0.887218	0.585021	0.649081	0.505946	0.603116	0.543786	0.468072
6	rs853676	0	28407666	A	G	300	rs853676_A	12248.3	12242.4	0.00484218	1.16479e-07	0.108329	4.21679e-05	0.0194209	0.00189801	0.00043096	0.00170618
6	rs17312661	0	28408315	G	A	301	rs17312661_G	12242.8	12238.6	0.0122003	0.000156912	0.241379	0.000552724	0.0471993	0.00723916	0.0022091	0.00574174
6	rs7772827	0	28409122	G	A	302	rs7772827_G	12247.8	12240.4	0.00213846	1.69589e-05	0.0383819	7.82274e-05	0.00623001	0.00104594	0.000269369	0.000565365
6	rs1416920	0	28410763	G	A	303	rs1416920_G	12246.3	12237.8	0.00119724	8.52019e-06	0.0262038	3.70814e-05	0.0038559	0.000590962	0.000146214	0.000299333
6	rs9468344	0	28417548	C	A	304	rs9468344_C	12243.7	12234.8	0.000951913	6.53116e-06	0.022015	2.90544e-05	0.00317951	0.000465583	0.000114174	0.000234437
6	rs6912584	0	28417569	G	A	305	rs6912584_G	12248.3	12243.3	0.00816173	6.70582e-05	0.166779	0.000367485	0.0461372	0.00612006	0.00148162	0.00297723
6	rs12180820	0	28424457	A	G	306	rs12180820_A	12247.8	12240.4	0.00213637	1.71762e-05	0.0408918	7.86493e-05	0.00692152	0.00112096	0.0002808	0.000557998
6	rs213237	0	28431917	G	A	307	rs213237_G	12237.3	12237.4	0.172917	0.017541	0.578051	0.0342439	0.262632	0.0930541	0.0511955	0.0886168
6	rs6921919	0	28433180	G	C	308	rs6921919_G	12248	12245.4	0.033177	0.000301825	0.396774	0.00219887	0.146095	0.0264876	0.00799703	0.0153644
6	rs6922111	0	28433287	A	G	309	rs6922111_A	12247.8	12245.3	0.0332521	0.000301363	0.397219	0.00220268	0.146324	0.0265491	0.00799874	0.0153709
6	rs213230	0	28438243	G	A	310	rs213230_G	12247.7	12243.1	0.00996953	6.94282e-05	0.107248	0.000475677	0.0227312	0.00435346	0.00137777	0.00318775
6	rs213228	0	28439231	C	A	311	rs213228_C	12242.2	12237.9	0.0115344	9.03498e-05	0.116304	0.000678788	0.0288202	0.00752347	0.00164821	0.00354446
6	rs7773051	0	28448295	A	G	312	rs7773051_A	12228.4	12226.7	0.0531438	0.00098471	0.332666	0.00552909	0.119088	0.0458353	0.0130213	0.0257769
6	rs7774981	0	28454889	G	A	313	rs7774981_G	12248.3	12246.5	0.0506086	0.000500847	0.54442	0.00547773	0.247818	0.0769848	0.018969	0.0359583
6	rs1052215	0	28456137	A	C	314	rs1052215_A	12247.5	12247.7	0.182024	0.022836	0.616492	0.0388571	0.288055	0.108075	0.0592857	0.10011
6	rs2531825	0	28457243	A	G	315	rs2531825_A	12247	12247.5	0.22037	0.0306071	0.685545	0.050125	0.338339	0.13469	0.073725	0.124981
6	rs13213152	0	28457677	G	A	316	rs13213152_G	12248.3	12240.8	0.0020315	1.90978e-09	0.104768	2.53453e-06	0.0130862	0.000479131	0.000103583	0.000634597
6	rs3734563	0	28457704	G	A	317	rs3734563_G	12237.1	12234.7	0.0352748	0.000546103	0.259388	0.00317406	0.0878933	0.0322419	0.00814928	0.0171662
6	rs7764722	0	28462512	A	G	318	rs7764722_A	12240.2	12237.9	0.0403146	0.000704397	0.28008	0.00404378	0.0975891	0.036424	0.00999578	0.0206485
6	rs9461458	0	28463854	A	G	319	rs9461458_A	12199.3	12195.7	0.017889	0.000187648	0.161418	0.00128146	0.0481141	0.0160215	0.00351172	0.00790644
6	rs1361385	0	28466299	G	A	320	rs1361385_G	12248.3	12246.3	0.0452565	0.000826922	0.30011	0.0046238	0.105372	0.0398993	0.0111942	0.0230286
6	rs2041230	0	28473494	G	A	321	rs2041230_G	12248.3	12246.2	0.041397	0.000728793	0.283713	0.00412864	0.0984666	0.0366229	0.0101259	0.0210047
6	rs2232423	0	28474130	G	A	322	rs2232423_G	12248.3	12240.3	0.0015269	1.15024e-09	0.0871133	1.67025e-06	0.0101738	0.00034432	7.28361e-05	0.000458047
6	rs2232422	0	28474241	A	G	323	rs2232422_A	12248.3	12250.3	0.955037	0.251707	0.732323	0.789563	0.913991	0.875042	0.943082	0.98569
6	rs4357130	0	28475662	C	A	324	rs4357130_C	12247.8	12245.7	0.0430521	0.000756864	0.290949	0.00430623	0.101968	0.0380554	0.0104969	0.0216901
6	rs9468370	0	28476919	A	G	325	rs9468370_A	12248.3	12246.1	0.0406964	0.000706156	0.281205	0.00403392	0.0973093	0.0360625	0.00993964	0.0206576
6	rs13196606	0	28478057	A	G	326	rs13196606_A	12245.5	12243.8	0.0519257	0.000532215	0.551766	0.00563837	0.250818	0.078047	0.0195831	0.0372035
6	rs6907950	0	28478225	A	G	327	rs6907950_A	12246.6	12244.4	0.0408289	0.000708815	0.280457	0.00402016	0.0965875	0.0358634	0.00990709	0.0205018
6	rs6908137	0	28478372	C	A	328	rs6908137_C	12247.3	12245.1	0.0406968	0.00071925	0.280184	0.00400966	0.0966223	0.0358243	0.00995736	0.0206194
6	rs4254981	0	28479381	C	A	329	rs4254981_C	12246.2	12243.4	0.0290086	0.000449945	0.216229	0.00258464	0.0699854	0.0248713	0.00642391	0.0136793
6	rs1124131	0	28488227	C	A	330	rs1124131_C	12248.3	12245.3	0.0249834	0.000366418	0.195196	0.00207918	0.0614187	0.0214075	0.0053453	0.0115755
6	rs6899389	0	28489119	A	C	331	rs6899389_A	12239.3	12236.4	0.0262564	0.000399588	0.20178	0.00217848	0.064184	0.0224838	0.00557516	0.0120521
6	rs1558205	0	28490241	A	C	332	rs1558205_A	12248.3	12243.5	0.00906904	0.000108347	0.0962226	0.000608122	0.0241999	0.00682892	0.00141775	0.00325164
6	rs6922169	0	28490911	A	G	333	rs6922169_A	12248.3	12245.5	0.0273217	0.000417233	0.207173	0.00235325	0.0660658	0.023317	0.00596214	0.0128219
6	rs16894091	0	28498116	A	T	334	rs16894091_A	12247.3	12244.9	0.0341934	0.000289539	0.428428	0.0032146	0.180762	0.0519781	0.011721	0.0229047
6	rs16894095	0	28498209	A	G	335	rs16894095_A	12224.3	12219.7	0.010275	0.000103271	0.104402	0.000482223	0.0287197	0.00945433	0.00144928	0.00329273
6	rs3800328	0	28498822	A	G	336	rs3800328_A	12246.5	12243.7	0.0282709	0.00044243	0.210686	0.00246484	0.0677258	0.0239171	0.00615689	0.0131425
6	rs2859365	0	28499444	G	A	337	rs2859365_G	12247.4	12247.8	0.21232	0.0287901	0.671986	0.0474537	0.329165	0.129239	0.070484	0.120472
6	rs1339898	0	28503485	A	G	338	rs1339898_A	12247.8	12243	0.00911938	0.000104209	0.0962906	0.000599839	0.0241002	0.00675299	0.00139605	0.00319694
6	rs7740351	0	28507391	C	A	339	rs7740351_C	12246.9	12244.2	0.0303065	0.000504933	0.224202	0.00271878	0.0728443	0.0262983	0.00685102	0.0141991
6	rs16894106	0	28508318	A	G	340	rs16894106_A	12247.3	12244.8	0.0336308	0.000282873	0.421574	0.00310937	0.176565	0.0502988	0.0112787	0.022134
6	rs7766356	0	28508517	G	A	341	rs7766356_G	12247.9	12244.3	0.0172207	0.000205546	0.310059	0.000836779	0.067072	0.0108628	0.00319361	0.00861504
6	rs11752919	0	28511582	G	A	342	rs11752919_G	12247.8	12241.4	0.00369967	1.44319e-05	0.00977072	0.000220355	0.00135419	0.00364815	0.000187617	0.000875979
6	rs6917130	0	28514800	G	A	343	rs6917130_G	12247.4	12240.9	0.00355578	1.43177e-05	0.00935313	0.000207249	0.00128196	0.00344577	0.000174948	0.000818939
6	rs916403	0	28516237	G	A	344	rs916403_G	12248.3	12245.6	0.0303323	0.000879041	0.0543998	0.00368482	0.011636	0.0186355	0.00236993	0.00894962
6	rs2531803	0	28519199	C	A	345	rs2531803_C	12247.8	12245.2	0.0306198	0.00100512	0.0551573	0.0037772	0.0112741	0.0177873	0.00237572	0.00886111
6	rs13190937	0	28519223	A	G	346	rs13190937_A	12242.9	12236.9	0.00475218	1.08514e-05	0.0283358	0.000340073	0.00551539	0.00917746	0.000416078	0.00177402
6	rs2531804	0	28519282	G	A	347	rs2531804_G	12248	12238.6	0.000734653	1.64061e-06	0.0023019	3.2401e-05	0.000244933	0.000672568	2.10558e-05	0.000121535
6	rs6902687	0	28521470	G	A	348	rs6902687_G	12247.1	12240.9	0.0041765	8.75824e-06	0.0254028	0.000285811	0.00481627	0.00810791	0.000354202	0.00153314
6	rs6939966	0	28523864	G	A	349	rs6939966_G	12225.2	12218.8	0.00367151	1.51371e-05	0.0098299	0.000231631	0.00132962	0.00361937	0.000191269	0.000905101
6	rs6903535	0	28525201	G	A	350	rs6903535_G	12247.8	12241.2	0.00327831	1.23409e-05	0.00856319	0.000185527	0.00116976	0.00320347	0.000151778	0.000748376
6	rs1041926	0	28534275	G	A	351	rs1041926_G	12248.3	12250.2	0.731764	0.705897	0.567712	0.619955	0.432788	0.427001	0.747859	0.612605
6	rs16894128	0	28552144	G	A	352	rs16894128_G	12248.3	12248.6	0.191351	0.0921418	0.0335715	0.180921	0.030452	0.314628	0.0763575	0.132782
6	rs1029328	0	28555894	G	A	353	rs1029328_G	12245.8	12245.9	0.175726	0.0832652	0.0312416	0.17067	0.0276517	0.283124	0.0736668	0.122038
6	rs1015811	0	28556065	G	A	354	rs1015811_G	12248.3	12250.1	0.668297	0.73572	0.145683	0.641995	0.121105	0.499347	0.314106	0.436808
6	rs7770236	0	28558416	A	G	355	rs7770236_A	12248.3	12246	0.037245	0.0116761	0.0556412	0.0333723	0.0472703	0.0729159	0.044995	0.0402556
6	rs2859355	0	28569200	A	G	356	rs2859355_A	12248.3	12250	0.549526	0.709411	0.724562	0.562185	0.632612	0.69986	0.924992	0.895712
6	rs12661782	0	28574421	G	A	357	rs12661782_G	12247.2	12248.9	0.56835	0.595998	0.971021	0.718405	0.867673	0.947998	0.891487	0.872328
6	rs2071966	0	28581304	C	A	358	rs2071966_C	12245.2	12247	0.66857	0.678055	0.885401	0.816414	0.793816	0.96686	0.988198	0.761279
6	rs722788	0	28591129	C	A	359	rs722788_C	12247.7	12249.3	0.532151	0.204766	0.211351	0.602407	0.190217	0.831981	0.409864	0.584708
6	rs406113	0	28591461	C	A	360	rs406113_C	12240.6	12242.2	0.561961	0.737523	0.709961	0.573803	0.624787	0.710374	0.938974	0.910489
6	rs445870	0	28602306	G	A	361	rs445870_G	12248.3	12250	0.596282	0.768798	0.651004	0.673667	0.595209	0.699969	0.985264	0.99351
6	rs13215054	0	28610773	A	C	362	rs13215054_A	12248.3	12248.3	0.152612	0.0137202	0.847609	0.0305178	0.312485	0.134663	0.0720588	0.154945
6	rs6456825	0	28630674	G	A	363	rs6456825_G	12247.8	12249.8	0.759638	0.203182	0.680556	0.306382	0.80184	0.486597	0.367021	0.421399
6	rs414745	0	28634634	C	A	364	rs414745_C	12232.4	12232.9	0.222911	0.0262504	0.926327	0.0474644	0.500322	0.138142	0.0776124	0.118434
6	rs418092	0	28641925	A	G	365	rs418092_A	12247.8	12248.6	0.273474	0.0345873	0.964035	0.061662	0.591186	0.174159	0.101379	0.151395
6	rs450630	0	28650403	A	G	366	rs450630_A	12248.3	12250.3	0.824883	0.231641	0.61937	0.348959	0.860185	0.534725	0.410405	0.462356
6	rs370520	0	28650499	A	G	367	rs370520_A	12248.3	12250.3	0.824883	0.231641	0.61937	0.348959	0.860185	0.534725	0.410405	0.462356
6	rs17336532	0	28651243	A	G	368	rs17336532_A	12247.5	12245.4	0.0436772	0.00128482	0.482691	0.00330775	0.145412	0.0324382	0.00990942	0.022798
6	rs16901848	0	28654931	A	G	369	rs16901848_A	12248.3	12246.6	0.0532999	0.00179795	0.532751	0.00674021	0.1603	0.0333287	0.0148937	0.0322442
6	rs6901724	0	28673806	G	A	370	rs6901724_G	12248.3	12249.9	0.518567	0.603041	0.591098	0.764755	0.342026	0.369514	0.521829	0.476824
6	rs418914	0	28676507	G	A	371	rs418914_G	12247	12247.7	0.254403	0.0321887	0.988227	0.0561655	0.573965	0.164072	0.0922257	0.138431
6	rs442439	0	28680985	A	G	372	rs442439_A	12246.9	12247.5	0.242843	0.025059	0.985165	0.0551103	0.574742	0.188634	0.0929176	0.137296
6	rs9501180	0	28687450	A	G	373	rs9501180_A	12248.3	12250.2	0.68757	0.201918	0.67558	0.292198	0.777075	0.453013	0.365805	0.411587
6	rs16894171	0	28710251	A	G	374	rs16894171_A	12247.8	12249.3	0.461039	0.159814	0.638783	0.410428	0.859655	0.739744	0.60789	0.631794
6	rs7743296	0	28722589	T	A	375	rs7743296_T	12248.3	12249.1	0.277602	0.0715113	0.330729	0.218162	0.436574	0.452691	0.365426	0.391284
6	rs13194504	0	28738670	A	G	376	rs13194504_A	12245.6	12237.8	0.00175444	1.15506e-09	0.103838	2.14729e-06	0.0112329	0.000355635	8.99923e-05	0.00055342
6	rs7767008	0	28738772	C	A	377	rs7767008_C	12247.8	12249.8	0.799685	0.325508	0.188085	0.728125	0.577534	0.885475	0.979803	0.812313
6	rs16894191	0	28749668	G	A	378	rs16894191_G	12248.3	12249	0.246605	0.0526547	0.262901	0.175201	0.378146	0.39513	0.270653	0.295749
6	rs3864294	0	28749936	G	A	379	rs3864294_G	12248.3	12249.5	0.375977	0.81608	0.080846	0.616989	0.325111	0.65378	0.460145	0.497948
6	rs12111360	0	28775427	A	G	380	rs12111360_A	12245	12246.9	0.672419	0.439339	0.719495	0.7048	0.723962	0.896746	0.740629	0.704638
6	rs6939576	0	28777294	A	G	381	rs6939576_A	12248.3	12249.6	0.380422	0.0322017	0.813192	0.144224	0.532071	0.260128	0.311279	0.430903
6	rs6908726	0	28779322	G	C	382	rs6908726_G	12248.3	12243.5	0.00901008	3.06884e-08	0.265626	6.01465e-05	0.0436364	0.00220763	0.00113496	0.00547003
6	rs9368570	0	28784172	A	G	383	rs9368570_A	12245.6	12241.8	0.0165027	0.00187501	0.014281	0.00980399	0.0103306	0.0288897	0.0152717	0.0249686
6	rs1539584	0	28787924	C	A	384	rs1539584_C	12245.1	12245.9	0.286153	0.0861368	0.290307	0.265449	0.230817	0.374455	0.348248	0.516711
6	rs9468413	0	28797651	C	A	385	rs9468413_C	12247.9	12243.5	0.0113486	2.60623e-05	0.327466	0.000361104	0.0938192	0.00426651	0.00118399	0.00589018
6	rs9393929	0	28804042	A	C	386	rs9393929_A	12244.7	12239.5	0.00757477	2.33194e-08	0.244882	4.78961e-05	0.0394977	0.0018813	0.00100165	0.00490087
6	rs7755641	0	28807348	G	A	387	rs7755641_G	12247.3	12249.2	0.866285	0.906686	0.782836	0.990654	0.480843	0.869046	0.983869	0.70131
6	rs6456834	0	28808331	A	C	388	rs6456834_A	12248.3	12244.2	0.013026	3.13038e-05	0.353826	0.000445693	0.102011	0.0048359	0.00141448	0.00682817
6	rs880638	0	28814891	A	G	389	rs880638_A	12244.8	12246.6	0.619824	0.128751	0.71535	0.248026	0.6979	0.351049	0.307608	0.275862
6	rs1233579	0	28820642	G	A	390	rs1233579_G	12246.2	12238.3	0.00161338	6.77922e-10	0.10611	2.01154e-06	0.0114107	0.000344484	8.82335e-05	0.000552627
6	rs1233585	0	28824324	G	A	391	rs1233585_G	12247.5	12245.3	0.0410482	3.17003e-05	0.220615	0.00151192	0.0190915	0.0094424	0.00564756	0.0100951
6	rs9257136	0	28831820	C	A	392	rs9257136_C	12248.3	12240.5	0.00170925	7.98625e-10	0.108942	2.29817e-06	0.0119036	0.000364293	9.6166e-05	0.000602759
6	rs1233599	0	28839167	C	A	393	rs1233599_C	12248.3	12240.4	0.00164182	7.34168e-10	0.107085	2.17798e-06	0.0116097	0.000350962	9.38067e-05	0.00058997
6	rs1233604	0	28842655	A	G	394	rs1233604_A	12248.3	12240.3	0.00157802	6.72966e-10	0.104839	2.05764e-06	0.0113245	0.000338184	8.97734e-05	0.000568307
6	rs1233615	0	28847563	A	C	395	rs1233615_A	12245.8	12247.3	0.49947	0.969438	0.170929	0.971175	0.561058	0.950382	0.915923	0.93325
6	rs1233619	0	28853431	A	G	396	rs1233619_A	12211.1	12202.3	0.001026	3.49104e-10	0.0781407	1.24596e-06	0.00763487	0.000215691	5.76708e-05	0.000374928
6	rs1233621	0	28855622	G	A	397	rs1233621_G	12247.7	12249.6	0.672439	0.749894	0.258297	0.838162	0.770415	0.702733	0.915116	0.862496
6	rs1311918	0	28861625	A	G	398	rs1311918_A	12248.3	12239.8	0.00117388	3.71443e-10	0.0883038	1.3419e-06	0.00881383	0.000239765	6.34661e-05	0.000414069
6	rs2765222	0	28875055	A	G	399	rs2765222_A	12242.2	12243.9	0.546457	0.257043	0.658886	0.393447	0.963988	0.630745	0.481728	0.629469
6	rs7767099	0	28876677	A	G	400	rs7767099_A	12246.6	12238	0.0011349	3.46852e-10	0.0889571	1.27204e-06	0.00896463	0.000242092	6.10091e-05	0.000395472
6	rs2765220	0	28877650	G	A	401	rs2765220_G	12226.1	12223.8	0.0362187	2.62772e-05	0.333588	0.00147537	0.0425267	0.0112229	0.00747007	0.0153003
6	rs3131343	0	28883543	A	G	402	rs3131343_A	12247.8	12239.3	0.00117346	3.72943e-10	0.0910634	1.32328e-06	0.00934921	0.000250801	6.51357e-05	0.000422726
6	rs4324798	0	28884096	A	G	403	rs4324798_A	12247.9	12238.5	0.000728926	1.93613e-10	0.0697784	6.9547e-07	0.00633734	0.00014652	3.88087e-05	0.000262858
6	rs209181	0	28900456	A	G	404	rs209181_A	12244.4	12237	0.00220256	8.75132e-08	0.0742736	2.53004e-05	0.00470222	0.000780446	0.000356564	0.000865779
6	rs3118357	0	28910128	A	G	405	rs3118357_A	12245.8	12237.3	0.00119405	4.07169e-10	0.0928236	1.36539e-06	0.00951348	0.000257554	6.7326e-05	0.000430216
6	rs9257248	0	28911270	A	G	406	rs9257248_A	12242.4	12233.5	0.00096317	2.47282e-10	0.0821676	9.53112e-07	0.00805232	0.000210529	4.86228e-05	0.000323019
6	rs176461	0	28934384	G	A	407	rs176461_G	12248.3	12250	0.585609	0.92116	0.564578	0.783897	0.296075	0.62935	0.753799	0.553122
6	rs209165	0	28937465	C	A	408	rs209165_C	12244.4	12244.5	0.16577	0.0274355	0.408558	0.20144	0.59032	0.43715	0.343072	0.567432
6	rs3132389	0	28939000	C	A	409	rs3132389_C	12243.6	12236.5	0.00251551	1.37964e-09	0.139711	3.70454e-06	0.0166301	0.000564844	0.000151536	0.000905548
6	rs3132390	0	28940767	G	A	410	rs3132390_G	12247.4	12241.9	0.00619415	1.35255e-08	0.226896	3.44775e-05	0.0341388	0.00151367	0.000751825	0.00380508
6	rs4713182	0	28941204	A	G	411	rs4713182_A	12248.3	12246.4	0.0489165	0.0376582	0.0362136	0.0232745	0.0470507	0.0823521	0.021722	0.0196736
6	rs3132392	0	28946608	G	A	412	rs3132392_G	12248.3	12239.8	0.00120085	3.84985e-10	0.0941335	1.35191e-06	0.00964674	0.000262187	6.7059e-05	0.000430473
6	rs2894065	0	28947900	A	G	413	rs2894065_A	12247.9	12245.9	0.0445638	0.0330565	0.0325936	0.0208146	0.0429087	0.0758862	0.0192865	0.0180003
6	rs1016472	0	28959346	G	A	414	rs1016472_G	12247.9	12248.9	0.314188	0.0796788	0.626787	0.31157	0.816221	0.688729	0.485403	0.770361
6	rs3135309	0	28963784	C	A	415	rs3135309_C	12248.3	12239.2	0.000853012	1.98228e-10	0.077469	7.93408e-07	0.00713094	0.000177288	4.19971e-05	0.000290867
6	rs209139	0	28971462	A	C	416	rs209139_A	12248.3	12250.3	0.857445	0.867436	0.88593	0.799395	0.537199	0.905633	0.823044	0.988373
6	rs209131	0	28975734	G	A	417	rs209131_G	12243.5	12244.6	0.360559	0.0747834	0.538991	0.316294	0.667017	0.590361	0.496731	0.784498
6	rs3132377	0	28993953	G	A	418	rs3132377_G	12248.3	12249.5	0.360124	0.0715693	0.536661	0.319215	0.671341	0.602848	0.498222	0.785368
6	rs2230683	0	28999155	G	A	419	rs2230683_G	12247.7	12239	0.00107491	3.0642e-10	0.0891723	1.09289e-06	0.00853696	0.000222097	5.4235e-05	0.000363673
6	rs2894066	0	29001906	A	G	420	rs2894066_A	12248.3	12249.2	0.283655	0.0362955	0.656472	0.0564844	0.236775	0.0831998	0.0705161	0.0593355
6	rs3763338	0	29002290	A	G	421	rs3763338_A	12248.3	12246.9	0.0661473	0.0447068	0.0304463	0.0231499	0.0409461	0.0766	0.0185081	0.0165063
6	rs2015436	0	29004893	G	A	422	rs2015436_G	12248.3	12249.3	0.302943	0.0584525	0.450747	0.268235	0.548861	0.479804	0.400093	0.654236
6	rs3118361	0	29006266	A	G	423	rs3118361_A	12248.3	12241	0.00224196	1.23735e-09	0.127014	3.33207e-06	0.0135946	0.000448535	0.00012407	0.000757906
6	rs1004062	0	29010112	C	A	424	rs1004062_C	12248.3	12249	0.258903	0.789279	0.0598532	0.559327	0.295583	0.731801	0.496725	0.536668
6	rs6912843	0	29012141	G	A	425	rs6912843_G	12230.8	12232.3	0.445689	0.0987563	0.637121	0.396508	0.775058	0.702188	0.603748	0.908836
6	rs3130895	0	29013770	A	G	426	rs3130895_A	12248.3	12240.1	0.00136281	4.58206e-10	0.100284	1.50825e-06	0.0102448	0.000285526	7.16641e-05	0.000466276
6	rs3131070	0	29014510	A	T	427	rs3131070_A	12248.3	12248.9	0.24142	0.760567	0.0539669	0.528243	0.274627	0.697514	0.465969	0.506778
6	rs4713186	0	29017444	G	A	428	rs4713186_G	12248.3	12244.7	0.0175283	0.00136102	0.0204712	0.00701031	0.0374116	0.0460506	0.0135469	0.0354325
6	rs7761745	0	29017758	A	G	429	rs7761745_A	12248.3	12244.6	0.0172005	0.0139437	0.00602326	0.00508145	0.00813514	0.0193798	0.00352704	0.00358069
6	rs2071790	0	29019781	G	A	430	rs2071790_G	12248.3	12249	0.244719	0.75151	0.0546894	0.527981	0.279916	0.70798	0.4683	0.512898
6	rs2071789	0	29020055	A	G	431	rs2071789_A	12247.8	12246.6	0.0723466	0.0450811	0.184851	0.10533	0.145166	0.178833	0.122833	0.246937
6	rs2071788	0	29020286	A	G	432	rs2071788_A	12248.3	12247.2	0.0787478	0.0677888	0.0578188	0.0389103	0.0754899	0.126967	0.0387044	0.0361188
6	rs4947339	0	29024231	A	G	433	rs4947339_A	12248.3	12241.5	0.00303073	0.000113814	0.00452479	0.00105345	0.0100299	0.0134605	0.0027417	0.00817277
6	rs9257403	0	29024951	A	G	434	rs9257403_A	12248	12245.5	0.0324292	0.00464042	0.0677852	0.0284745	0.0798311	0.135114	0.0478445	0.0851971
6	rs6456876	0	29026915	G	A	435	rs6456876_G	12247.8	12241.5	0.00393585	0.000144169	0.00570751	0.00137635	0.0125696	0.0168552	0.00339899	0.0100584
6	rs3131073	0	29028951	A	G	436	rs3131073_A	12248	12239.4	0.00110948	2.74377e-10	0.0882866	1.01272e-06	0.00827205	0.000214363	5.17895e-05	0.000348832
6	rs4947256	0	29029919	A	C	437	rs4947256_A	12248.3	12248.4	0.160796	0.101816	0.0843461	0.0688133	0.108484	0.187938	0.0534375	0.0492352
6	rs1476016	0	29030698	G	A	438	rs1476016_G	12248.3	12249.3	0.307815	0.856847	0.0774696	0.645537	0.349619	0.822381	0.564471	0.609535
6	rs3130845	0	29031346	G	A	439	rs3130845_G	12248.3	12240.1	0.00137457	4.52675e-10	0.101013	1.50044e-06	0.0102647	0.000286073	7.15281e-05	0.000465304
6	rs12386522	0	29036146	G	A	440	rs12386522_G	12248.3	12249.8	0.492185	0.793047	0.491083	0.710351	0.238508	0.556513	0.690833	0.490516
6	rs9257425	0	29044535	G	A	441	rs9257425_G	12244.7	12245.8	0.354671	0.0884762	0.691362	0.352854	0.906595	0.797342	0.570054	0.879877
6	rs6933672	0	29049667	A	G	442	rs6933672_A	12248.3	12250.2	0.737944	0.539938	0.801039	0.920093	0.534173	0.587534	0.65507	0.548818
6	rs16894533	0	29053501	A	G	443	rs16894533_A	12248.3	12248.9	0.228137	0.0865743	0.307007	0.304755	0.265013	0.308245	0.429435	0.662687
6	rs3135322	0	29054899	A	G	444	rs3135322_A	12248.3	12249	0.244881	0.739309	0.0498596	0.52894	0.254472	0.688545	0.44074	0.482165
6	rs3130837	0	29056071	A	C	445	rs3130837_A	12248.3	12240	0.00129431	4.24155e-10	0.10147	1.35239e-06	0.0101193	0.000277724	6.99422e-05	0.000450461
6	rs9257445	0	29057185	C	G	446	rs9257445_C	12248.3	12248.5	0.177736	0.0496231	0.13413	0.0672795	0.228694	0.237506	0.0632727	0.0872179
6	rs968722	0	29057883	A	G	447	rs968722_A	12248.3	12249.6	0.38471	0.147199	0.161312	0.136422	0.269103	0.253009	0.120018	0.16306
6	rs3130888	0	29057939	G	A	448	rs3130888_G	12248.3	12239.8	0.00115418	4.00472e-10	0.0956014	1.20062e-06	0.00922944	0.000248924	6.02727e-05	0.000395475
6	rs6904975	0	29060014	A	G	449	rs6904975_A	12248.3	12245	0.0208599	0.00140955	0.0210884	0.00774772	0.0360385	0.0478664	0.0130555	0.0345449
6	rs3129791	0	29062272	A	G	450	rs3129791_A	12248.3	12239.4	0.000943737	2.39559e-10	0.0855696	8.72727e-07	0.00791215	0.000198708	4.73803e-05	0.000320517
6	rs3129792	0	29064395	A	G	451	rs3129792_A	12245.3	12245.9	0.231348	0.723339	0.0457044	0.505619	0.243384	0.669154	0.42065	0.460713
6	rs6934470	0	29064730	G	A	452	rs6934470_G	12248.3	12248.6	0.189569	0.216824	0.15144	0.191701	0.108327	0.0948771	0.108355	0.0962471
6	rs9468458	0	29065562	A	G	453	rs9468458_A	12247.6	12247.3	0.129953	0.0790079	0.0490035	0.0547404	0.0498027	0.10451	0.0541815	0.0489106
6	rs7776164	0	29066437	A	C	454	rs7776164_A	12229.1	12230.5	0.42343	0.324755	0.752857	0.476204	0.794367	0.873472	0.507546	0.51881
6	rs16894540	0	29069798	G	A	455	rs16894540_G	12248.3	12247.9	0.12125	0.0427022	0.169626	0.142331	0.156684	0.197478	0.233502	0.387652
6	rs6456880	0	29071227	C	A	456	rs6456880_C	12248.3	12240.4	0.00167166	4.75228e-05	0.00218198	0.000488213	0.00498565	0.0073372	0.00123817	0.00389986
6	rs9468459	0	29073670	A	G	457	rs9468459_A	12248.3	12249.9	0.538484	0.974598	0.710348	0.890274	0.398104	0.761902	0.959567	0.72202
6	rs6920392	0	29075017	G	A	458	rs6920392_G	12247.8	12240.3	0.00198561	6.19007e-05	0.00256159	0.000598752	0.0057254	0.00854413	0.00145241	0.00467995
6	rs6906909	0	29076125	G	A	459	rs6906909_G	12248.3	12241.1	0.00245411	8.06714e-05	0.00308705	0.000749369	0.00686882	0.0101886	0.00179491	0.00564869
6	rs9257453	0	29076909	G	A	460	rs9257453_G	12248.3	12248.7	0.197577	0.135286	0.453758	0.237113	0.479172	0.534058	0.260779	0.267356
6	rs9295784	0	29077127	C	A	461	rs9295784_C	12248.3	12249.7	0.432369	0.870283	0.577146	0.746423	0.303403	0.627307	0.805679	0.590597
6	rs6456881	0	29078079	A	G	462	rs6456881_A	12245.1	12246.4	0.404303	0.155948	0.170066	0.144467	0.275958	0.262648	0.126691	0.171836
6	rs3129793	0	29078155	G	A	463	rs3129793_G	12248.3	12249	0.250378	0.743828	0.0509059	0.537599	0.256454	0.690784	0.451509	0.492762
6	rs9257455	0	29078724	A	G	464	rs9257455_A	12247.8	12244.5	0.0211185	0.00137519	0.0207475	0.00774935	0.0353502	0.0462189	0.0131459	0.0343142
6	rs6925178	0	29081194	A	C	465	rs6925178_A	12248.3	12248.6	0.192172	0.0548778	0.142925	0.0733458	0.238234	0.248955	0.0695016	0.0953577
6	rs3130893	0	29088686	G	A	466	rs3130893_G	12248.3	12239.3	0.000922243	2.42593e-10	0.0842786	8.32948e-07	0.00781704	0.000191584	4.58769e-05	0.000310812
6	rs6930903	0	29089223	G	A	467	rs6930903_G	12248.3	12248.4	0.163693	0.0456169	0.119733	0.0604001	0.2092	0.218582	0.0564389	0.0782961
6	rs6916923	0	29092142	A	G	468	rs6916923_A	12245.3	12246.5	0.379175	0.294283	0.707431	0.434038	0.750277	0.816433	0.466142	0.473191
6	rs9468464	0	29092491	G	A	469	rs9468464_G	12248.3	12249.4	0.341565	0.632445	0.33069	0.529965	0.135579	0.343847	0.444044	0.283279
6	rs3129795	0	29092734	A	C	470	rs3129795_A	12248.3	12248.6	0.190738	0.33965	0.0363702	0.422294	0.288776	0.75276	0.267143	0.513223
6	rs9380103	0	29093184	G	A	471	rs9380103_G	12248.3	12247.6	0.0979572	0.0844971	0.0650747	0.047231	0.0863966	0.146707	0.0430053	0.0404131
6	rs6941946	0	29096562	G	A	472	rs6941946_G	12247.4	12241	0.00384548	0.000104246	0.00396055	0.00120834	0.00851137	0.0116286	0.00262227	0.00818084
6	rs2394513	0	29100487	A	G	473	rs2394513_A	12232.9	12234.1	0.384445	0.241254	0.674833	0.458746	0.714227	0.761457	0.472842	0.492548
6	rs7741520	0	29102549	G	A	474	rs7741520_G	12248.3	12249	0.247866	0.0674679	0.1664	0.100686	0.27479	0.276487	0.0903634	0.126232
6	rs10484544	0	29103698	G	A	475	rs10484544_G	12248.3	12248	0.125284	0.0401801	0.17136	0.143089	0.155934	0.195439	0.233579	0.386971
6	rs4713197	0	29105564	C	A	476	rs4713197_C	12248.3	12248.7	0.197918	0.101815	0.0547782	0.0733139	0.0551171	0.123627	0.0572592	0.0537985
6	rs16894557	0	29107805	A	G	477	rs16894557_A	12244.8	12243.6	0.0744283	0.0706817	0.0746242	0.0942204	0.037323	0.0488346	0.0834626	0.219767
6	rs7755402	0	29110041	G	A	478	rs7755402_G	12248.3	12248	0.125284	0.0401801	0.17136	0.143089	0.155934	0.195439	0.233579	0.386971
6	rs9468471	0	29112070	A	G	479	rs9468471_A	12247.8	12248.4	0.238026	0.0638738	0.158709	0.0953674	0.265463	0.266698	0.0855062	0.120086
6	rs9468473	0	29114229	A	G	480	rs9468473_A	12247.8	12248.5	0.242445	0.065052	0.162437	0.0973847	0.269621	0.270827	0.0875676	0.122724
6	rs7743837	0	29114823	G	A	481	rs7743837_G	12248.3	12246.1	0.0405547	0.00594782	0.0286968	0.0119523	0.0653286	0.0683785	0.0129011	0.0195166
6	rs6919044	0	29117547	G	A	482	rs6919044_G	12241.9	12242.5	0.238754	0.0638549	0.159499	0.0949277	0.265929	0.26729	0.0855393	0.120321
6	rs12333226	0	29117922	A	T	483	rs12333226_A	12248.3	12249.8	0.45785	0.76301	0.461725	0.680594	0.224019	0.547214	0.656139	0.452489
6	rs6456889	0	29118803	G	A	484	rs6456889_G	12248.3	12249	0.244103	0.0658395	0.163399	0.0982712	0.271177	0.272556	0.0882563	0.123612
6	rs2050230	0	29119906	A	G	485	rs2050230_A	12200.4	12201	0.242182	0.694667	0.0400415	0.512325	0.223154	0.613309	0.420804	0.467217
6	rs2143574	0	29122005	A	G	486	rs2143574_A	12247.8	12240.8	0.00264495	6.70099e-05	0.00270048	0.000793407	0.00598439	0.00826117	0.0018082	0.00593332
6	rs3130756	0	29125080	G	A	487	rs3130756_G	12247.8	12248.7	0.292405	0.800736	0.0529671	0.596998	0.269284	0.694944	0.494948	0.550403
6	rs9348819	0	29127211	A	G	488	rs9348819_A	12248.3	12248.1	0.14052	0.116089	0.106614	0.071205	0.133203	0.212644	0.0674288	0.0647172
6	rs7747023	0	29133659	G	A	489	rs7747023_G	12247.8	12249.2	0.42487	0.175659	0.17757	0.151842	0.292259	0.274423	0.133112	0.181393
6	rs3117143	0	29139121	A	C	490	rs3117143_A	12248.3	12239.6	0.00105361	2.45433e-10	0.0945601	1.03683e-06	0.00879923	0.000226558	5.7228e-05	0.00037515
6	rs12665818	0	29140163	T	A	491	rs12665818_T	12248.3	12247.6	0.0978301	0.0302471	0.13709	0.112722	0.124667	0.15743	0.192135	0.329337
6	rs6918175	0	29147209	C	A	492	rs6918175_C	12248.3	12247.6	0.100849	0.0316196	0.143874	0.118374	0.128955	0.16482	0.199792	0.338614
6	rs6456895	0	29147874	A	G	493	rs6456895_A	12248.3	12241.4	0.00287628	7.56054e-05	0.00287255	0.000853075	0.00642518	0.00874361	0.00192852	0.00632147
6	rs3131083	0	29147956	G	A	494	rs3131083_G	12248.3	12249.3	0.304456	0.811753	0.0555268	0.61076	0.280766	0.714228	0.506316	0.56099
6	rs6456897	0	29149262	G	A	495	rs6456897_G	12248.3	12248.7	0.203997	0.232151	0.162446	0.203853	0.115464	0.101939	0.115341	0.102147
6	rs9348821	0	29155182	G	A	496	rs9348821_G	12248.3	12249.7	0.424537	0.176728	0.179115	0.152546	0.294598	0.277016	0.13446	0.18374
6	rs11758255	0	29158693	G	A	497	rs11758255_G	12248.3	12249	0.245739	0.0665292	0.164795	0.0986893	0.273315	0.274444	0.0888879	0.124686
6	rs6903771	0	29160551	A	G	498	rs6903771_A	12247.8	12249.3	0.448523	0.18669	0.191404	0.163797	0.309317	0.292208	0.14476	0.19705
6	rs3129788	0	29165618	A	G	499	rs3129788_A	12247.9	12239.1	0.00100812	2.29943e-10	0.092848	1.02662e-06	0.00860941	0.000224833	5.72655e-05	0.000376294
6	rs9380109	0	29165950	G	A	500	rs9380109_G	12248.3	12241.3	0.00269716	6.83137e-05	0.00273088	0.000806708	0.006132	0.00834257	0.00184826	0.00606411
6	rs2142905	0	29172751	G	A	501	rs2142905_G	12248.3	12243.7	0.0102923	0.00195755	0.0211996	0.0129925	0.0215504	0.0302197	0.0341555	0.0699543
6	rs4713201	0	29175242	G	A	502	rs4713201_G	12248.3	12247.5	0.0955663	0.084408	0.0646473	0.0467043	0.085083	0.146154	0.0428426	0.0407508
6	rs3129111	0	29175751	A	G	503	rs3129111_A	12248.3	12249.7	0.441168	0.277706	0.73126	0.514022	0.775596	0.822273	0.521566	0.54033
6	rs3131091	0	29181073	G	A	504	rs3131091_G	12248.3	12249.3	0.314493	0.832764	0.0586121	0.627477	0.288592	0.727887	0.522495	0.577161
6	rs6456908	0	29183051	A	G	505	rs6456908_A	12247.9	12248.6	0.251452	0.0686759	0.1685	0.101183	0.279625	0.280408	0.0908509	0.127236
6	rs3749977	0	29188323	A	G	506	rs3749977_A	12248.3	12249	0.247547	0.0661974	0.164609	0.0995367	0.274863	0.275592	0.0892725	0.124664
6	rs3129106	0	29189140	C	A	507	rs3129106_C	12248.3	12247.8	0.11137	0.125534	0.0102024	0.246192	0.112215	0.47184	0.104454	0.28456
6	rs3130766	0	29194808	G	A	508	rs3130766_G	12248.3	12249.2	0.297594	0.809272	0.0539513	0.604458	0.275586	0.705803	0.502278	0.5566
6	rs2064162	0	29196794	G	A	509	rs2064162_G	12225.7	12218.9	0.00298942	8.24371e-05	0.00298824	0.000908492	0.00670142	0.00910678	0.00210583	0.00696306
6	rs3130772	0	29200558	G	C	510	rs3130772_G	12201.7	12195.7	0.00469797	0.000132341	0.00502587	0.00152781	0.0102726	0.0138175	0.00342656	0.0105185
6	rs3130773	0	29203887	A	G	511	rs3130773_A	12248.3	12240.6	0.00177221	6.00348e-10	0.130582	2.34839e-06	0.0136724	0.000418867	0.000111246	0.000682338
6	rs3130778	0	29207558	A	G	512	rs3130778_A	12247.7	12241.2	0.0034277	0.000118219	0.00485897	0.00132311	0.0103601	0.0132494	0.00351807	0.0110304
6	rs2267632	0	29214447	A	G	513	rs2267632_A	12248.3	12250.3	0.976083	0.613296	0.601065	0.917098	0.545992	0.535758	0.860101	0.844506
6	rs9468487	0	29215031	G	A	514	rs9468487_G	12248.3	12249.8	0.455192	0.788173	0.454644	0.688876	0.202135	0.474064	0.59879	0.401994
6	rs9393945	0	29216270	C	G	515	rs9393945_C	12248.3	12247.7	0.10473	0.0922427	0.070407	0.0512731	0.0919886	0.156387	0.0465624	0.0436181
6	rs9368592	0	29221576	A	C	516	rs9368592_A	12235.3	12234.7	0.104083	0.0918139	0.0693031	0.0506484	0.0913606	0.155694	0.0458339	0.0429119
6	rs3116846	0	29222595	A	G	517	rs3116846_A	12248.3	12249.4	0.339644	0.873394	0.0670508	0.658325	0.32258	0.780818	0.563997	0.621428
6	rs3130724	0	29226509	A	C	518	rs3130724_A	12248.3	12249.3	0.317143	0.00305208	0.535664	0.0890669	0.931561	0.252867	0.278865	0.482492
6	rs3116847	0	29226792	G	A	519	rs3116847_G	12245.6	12245.5	0.141985	0.0524004	0.185989	0.164369	0.165827	0.200407	0.257836	0.417166
6	rs3129123	0	29227138	A	G	520	rs3129123_A	12248.3	12248.2	0.14976	0.669075	0.0195905	0.438938	0.0830599	0.445851	0.329053	0.304496
6	rs3129126	0	29229610	A	G	521	rs3129126_A	12242.1	12242.9	0.282447	0.786996	0.0499633	0.573823	0.264281	0.683763	0.483502	0.538619
6	rs3129131	0	29233381	G	A	522	rs3129131_G	12248.3	12248.5	0.182734	0.735294	0.0267063	0.502376	0.114117	0.548954	0.409457	0.385963
6	rs3130737	0	29243187	A	G	523	rs3130737_A	12246.9	12246.8	0.145631	0.662841	0.0189555	0.435681	0.0797399	0.435089	0.325172	0.301212
6	rs3130738	0	29244089	A	G	524	rs3130738_A	12230.7	12230.4	0.12964	0.624288	0.0156211	0.398995	0.0701952	0.408332	0.292896	0.269949
6	rs2394520	0	29245199	G	A	525	rs2394520_G	12248.3	12243.8	0.0106829	0.00147723	0.0386598	0.0168954	0.0405354	0.0571899	0.038188	0.0752041
6	rs3129151	0	29246294	A	G	526	rs3129151_A	12248.3	12249.3	0.30744	0.00280952	0.549153	0.0839963	0.917823	0.245035	0.268605	0.4679
6	rs3129152	0	29246756	C	A	527	rs3129152_C	12244.6	12245.2	0.230006	0.00175882	0.697454	0.0568783	0.733245	0.159067	0.177169	0.324583
6	rs3129154	0	29247765	G	A	528	rs3129154_G	12244.5	12244.9	0.202211	0.788342	0.0314447	0.552587	0.129125	0.5949	0.449559	0.424637
6	rs2206042	0	29250455	C	A	529	rs2206042_C	12247.9	12248.1	0.186761	0.750566	0.027911	0.517157	0.118165	0.561985	0.421531	0.396686
6	rs3130745	0	29256598	A	C	530	rs3130745_A	12248.3	12248.2	0.147271	0.673506	0.0195246	0.441824	0.0826103	0.443326	0.331747	0.306067
6	rs2006752	0	29259291	A	G	531	rs2006752_A	12207.1	12206.7	0.120904	0.59762	0.0145844	0.382211	0.0673731	0.393858	0.281307	0.258023
6	rs3116820	0	29259650	G	A	532	rs3116820_G	12238.4	12238.4	0.15214	0.688937	0.0201797	0.4512	0.0847869	0.449901	0.340502	0.315468
6	rs9257593	0	29260773	A	G	533	rs9257593_A	12248.3	12250	0.557322	0.623223	0.121004	0.925113	0.319664	0.974218	0.858513	0.820551
6	rs3116826	0	29269414	A	G	534	rs3116826_A	12248.3	12248.3	0.15433	0.691981	0.0203278	0.455546	0.0862691	0.454115	0.340831	0.314998
6	rs3116830	0	29275554	A	G	535	rs3116830_A	12248.3	12240.8	0.00206568	8.03397e-10	0.143505	2.67073e-06	0.0156136	0.000496423	0.000128459	0.000777011
6	rs760804	0	29279018	A	G	536	rs760804_A	12248.3	12249.3	0.30948	0.0029106	0.537928	0.0838246	0.932129	0.250632	0.270813	0.470835
6	rs10452602	0	29281066	A	G	537	rs10452602_A	12245.2	12243.8	0.0672088	0.107679	0.0567021	0.0237842	0.0682714	0.0837183	0.0265824	0.0195186
6	rs3116832	0	29287124	G	C	538	rs3116832_G	12248.3	12247.9	0.116558	0.0417569	0.153141	0.137686	0.139857	0.167041	0.213658	0.360726
6	rs9257616	0	29288700	A	G	539	rs9257616_A	12228.9	12229.1	0.184884	0.455286	0.0331223	0.482981	0.2285	0.678141	0.342213	0.416924
6	rs2894083	0	29290287	G	A	540	rs2894083_G	12248.3	12249.9	0.493126	0.698911	0.0982293	0.995949	0.276704	0.897204	0.783435	0.744939
6	rs3129096	0	29291325	G	A	541	rs3129096_G	12246.6	12248.1	0.512423	0.675199	0.104706	0.971938	0.290207	0.923518	0.806446	0.76807
6	rs3129098	0	29293266	G	A	542	rs3129098_G	12248.3	12249.8	0.487799	0.709427	0.0948923	0.988854	0.271211	0.886192	0.768285	0.726026
6	rs3130803	0	29297134	A	G	543	rs3130803_A	12248.3	12248	0.126051	0.605055	0.0153589	0.398256	0.0699383	0.398326	0.289728	0.265027
6	rs6904165	0	29299368	A	G	544	rs6904165_A	12246.9	12248.6	0.535826	0.34467	0.882786	0.621008	0.926741	0.976353	0.647828	0.668915
6	rs714470	0	29299390	C	A	545	rs714470_C	12112.7	12114.1	0.40878	0.784476	0.0712294	0.886826	0.221424	0.786751	0.673743	0.640175
6	rs12660419	0	29299527	A	G	546	rs12660419_A	12244.6	12243.8	0.0918774	0.0919718	0.0899727	0.117408	0.0493882	0.0618997	0.102928	0.262066
6	rs3130812	0	29301764	A	G	547	rs3130812_A	12248.3	12249.6	0.396364	0.805684	0.0690165	0.869539	0.210822	0.766452	0.666843	0.629424
6	rs11962388	0	29301838	G	A	548	rs11962388_G	12248.3	12249	0.252235	0.323366	0.22403	0.274347	0.170107	0.131653	0.158436	0.162674
6	rs11964645	0	29301968	G	A	549	rs11964645_G	12248.3	12248.4	0.161736	0.302269	0.146237	0.188722	0.100899	0.0977127	0.115633	0.0994689
6	rs3130813	0	29302990	G	A	550	rs3130813_G	12248.3	12249.8	0.455432	0.744017	0.0850832	0.942614	0.24664	0.835457	0.727759	0.688456
6	rs3130814	0	29304160	C	A	551	rs3130814_C	12248.3	12249.6	0.40896	0.837324	0.0499061	0.890095	0.186535	0.734691	0.632204	0.614085
6	rs2207338	0	29307803	C	A	552	rs2207338_C	12248.3	12250.3	0.872191	0.261981	0.164656	0.628588	0.397624	0.907786	0.861066	0.91716
6	rs3129105	0	29321049	C	A	553	rs3129105_C	12248.3	12249	0.256662	0.758003	0.0422872	0.543639	0.230213	0.629159	0.466409	0.51659
6	rs3117330	0	29333774	A	G	554	rs3117330_A	12246.5	12248.5	0.867357	0.263396	0.162693	0.632818	0.394864	0.911874	0.8653	0.922725
6	rs3117329	0	29335622	G	A	555	rs3117329_G	12246	12247.8	0.681576	0.638471	0.168581	0.898462	0.539104	0.942596	0.894474	0.95445
6	rs3130827	0	29338662	A	G	556	rs3130827_A	12248.3	12250.3	0.878879	0.257514	0.166971	0.622363	0.401453	0.902797	0.854698	0.911453
6	rs16894681	0	29340051	C	A	557	rs16894681_C	12247.7	12249.7	0.933977	0.85133	0.610909	0.853771	0.443201	0.822412	0.806258	0.695015
6	rs10484545	0	29342489	C	G	558	rs10484545_C	12248.3	12249.9	0.500424	0.294393	0.826789	0.572971	0.907297	0.939788	0.604167	0.628307
6	rs6904130	0	29343172	G	A	559	rs6904130_G	12248.3	12249.7	0.428749	0.227131	0.748643	0.498524	0.798201	0.836387	0.527303	0.550573
6	rs3130829	0	29343879	A	G	560	rs3130829_A	12238.6	12239.7	0.343192	0.894831	0.0635639	0.674257	0.320992	0.78095	0.568962	0.6271
6	rs7766902	0	29344624	A	C	561	rs7766902_A	12248.3	12248.3	0.157373	0.114337	0.0561675	0.0655124	0.0519357	0.114093	0.0586357	0.053873
6	rs3130830	0	29344701	G	A	562	rs3130830_G	12248.3	12250.2	0.690347	0.633094	0.172901	0.885378	0.549318	0.929117	0.907738	0.966992
6	rs6942318	0	29345994	A	G	563	rs6942318_A	12244.7	12246	0.426771	0.22581	0.746424	0.496961	0.795201	0.833617	0.525806	0.548975
6	rs9257660	0	29348258	A	G	564	rs9257660_A	12245.6	12246.2	0.249773	0.0893994	0.330075	0.337395	0.297125	0.331547	0.469786	0.718852
6	rs3117326	0	29348357	A	G	565	rs3117326_A	12248.3	12240.9	0.00209278	8.36634e-10	0.148335	2.6727e-06	0.0162384	0.000508277	0.000134796	0.000811514
6	rs3130834	0	29356128	G	A	566	rs3130834_G	12247.8	12240.4	0.00208117	8.08963e-10	0.147845	2.62869e-06	0.0161683	0.000507187	0.000133494	0.000804771
6	rs9468508	0	29361735	A	G	567	rs9468508_A	12248.3	12250.1	0.666304	0.965143	0.644248	0.90911	0.346875	0.750763	0.871022	0.650441
6	rs6901923	0	29361866	A	G	568	rs6901923_A	12247.7	12247.6	0.1436	0.220108	0.145468	0.171675	0.103567	0.0898549	0.102568	0.0881153
6	rs1884123	0	29364399	A	G	569	rs1884123_A	12247.6	12249.6	0.992425	0.222455	0.179447	0.553237	0.399384	0.948148	0.825713	0.914986
6	rs1123283	0	29366842	A	T	570	rs1123283_A	12246.4	12247.1	0.258027	0.763369	0.0333206	0.530993	0.180153	0.495195	0.380485	0.398259
6	rs4446587	0	29367602	G	A	571	rs4446587_G	12248.3	12249.5	0.356917	0.898376	0.0554041	0.674124	0.275023	0.673654	0.530197	0.558354
6	rs3117425	0	29368410	A	G	572	rs3117425_A	12244.8	12237.8	0.00274825	4.19827e-09	0.213697	7.09726e-06	0.0264203	0.000882729	0.000335966	0.00180574
6	rs3117439	0	29374462	A	G	573	rs3117439_A	12248.3	12241.3	0.00264004	3.19994e-09	0.220286	6.49137e-06	0.0282298	0.00100382	0.000359425	0.00194741
6	rs16867628	0	29374476	A	G	574	rs16867628_A	12247.6	12246.5	0.0803132	0.0680643	0.0907474	0.110976	0.0432871	0.0558263	0.101635	0.256661
6	rs9257691	0	29376908	C	A	575	rs9257691_C	12248.3	12250.2	0.726191	0.610681	0.158541	0.873962	0.492463	0.968518	0.873179	0.901189
6	rs4594993	0	29378477	G	A	576	rs4594993_G	12248.3	12249.2	0.279066	0.124232	0.310718	0.274791	0.270084	0.325777	0.281575	0.281188
6	rs9348826	0	29378774	G	C	577	rs9348826_G	12248.3	12249.2	0.292017	0.281187	0.149417	0.133367	0.173062	0.238354	0.105325	0.089275
6	rs3117426	0	29379991	A	G	578	rs3117426_A	12248.3	12248.3	0.153344	0.000343714	0.903119	0.0301037	0.489679	0.0954569	0.131371	0.27707
6	rs16894709	0	29380280	A	G	579	rs16894709_A	12248.3	12248.8	0.21473	0.0920207	0.236112	0.214135	0.200275	0.245927	0.213804	0.214653
6	rs3117427	0	29382115	G	A	580	rs3117427_G	12248.3	12241.6	0.00321125	5.35493e-09	0.222244	8.2839e-06	0.0299015	0.00115443	0.000381584	0.00192427
6	rs9257693	0	29382327	G	A	581	rs9257693_G	12248.3	12250.1	0.650507	0.705476	0.139852	0.951066	0.442747	0.886447	0.800757	0.830517
6	rs7774255	0	29382335	A	T	582	rs7774255_A	12248.3	12250.1	0.665283	0.722183	0.139613	0.942488	0.431344	0.923332	0.805541	0.838979
6	rs9257694	0	29382465	A	G	583	rs9257694_A	12248.3	12249.7	0.445818	0.998973	0.0929827	0.851423	0.360425	0.756029	0.678627	0.713852
6	rs17404424	0	29383277	A	G	584	rs17404424_A	12248.3	12250.1	0.647193	0.705962	0.466422	0.855178	0.253533	0.426161	0.823492	0.429033
6	rs9257696	0	29383486	G	A	585	rs9257696_G	12248.3	12245.3	0.0245953	0.0231399	0.024767	0.00663565	0.0348291	0.06168	0.0098391	0.00731267
6	rs9257710	0	29390965	G	A	586	rs9257710_G	12248.3	12249.2	0.292551	0.477736	0.472658	0.2722	0.465152	0.485785	0.320836	0.322273
6	rs9257711	0	29391422	A	G	587	rs9257711_A	12244.1	12235.1	0.000880229	0.00141909	0.00491349	0.00100001	0.00722756	0.00944524	0.00280034	0.00253572
6	rs3129683	0	29394649	G	C	588	rs3129683_G	12248.3	12242.3	0.00463195	3.99211e-07	0.191677	8.95089e-05	0.01469	0.002821	0.00159187	0.00361875
6	rs16894722	0	29400009	G	A	589	rs16894722_G	12248.3	12250.3	0.840281	0.894454	0.727321	0.997504	0.606468	0.937509	0.965396	0.920011
6	rs12660111	0	29404127	A	G	590	rs12660111_A	12244.9	12241.2	0.0173716	0.00510781	0.0204739	0.0288433	0.00652099	0.00733599	0.0187756	0.0549946
6	rs9357078	0	29405645	A	G	591	rs9357078_A	12247.4	12248.9	0.451922	0.393525	0.331575	0.251391	0.342495	0.447695	0.215286	0.185541
6	rs9257731	0	29407350	A	G	592	rs9257731_A	12248.3	12249.2	0.292551	0.477736	0.472658	0.2722	0.465152	0.485785	0.320836	0.322273
6	rs6930435	0	29409201	A	G	593	rs6930435_A	12248	12242.7	0.00701008	4.44847e-05	0.134705	0.000256273	0.0086839	0.00178387	0.000918188	0.00255139
6	rs6903989	0	29410009	A	C	594	rs6903989_A	12248.3	12243.2	0.00770559	5.65611e-05	0.133049	0.000247933	0.00991043	0.00215868	0.000871247	0.00243762
6	rs9257745	0	29414635	A	G	595	rs9257745_A	12248.3	12245.4	0.027034	0.0245127	0.0277483	0.00773319	0.0396389	0.0688257	0.011304	0.00852102
6	rs9257749	0	29418620	C	A	596	rs9257749_C	12248.3	12249.2	0.283942	0.462705	0.47486	0.272551	0.476263	0.490221	0.324291	0.326202
6	rs1014258	0	29418660	A	G	597	rs1014258_A	12248.3	12243	0.0067035	4.14205e-05	0.130564	0.000244235	0.00831245	0.00172101	0.000870766	0.00243537
6	rs10447393	0	29424831	A	G	598	rs10447393_A	12248.3	12249.8	0.472194	0.0609635	0.762844	0.236266	0.41904	0.157333	0.307328	0.48863
6	rs9257768	0	29430065	A	G	599	rs9257768_A	12248.3	12249.2	0.292551	0.477736	0.472658	0.2722	0.465152	0.485785	0.320836	0.322273
6	rs3117438	0	29431238	G	A	600	rs3117438_G	12248.3	12250.3	0.828581	0.296898	0.926802	0.855914	0.883618	0.569933	0.49236	0.63425
6	rs7761746	0	29431634	A	G	601	rs7761746_A	12248.3	12250.2	0.716096	0.765367	0.689939	0.471015	0.821082	0.915423	0.637439	0.614124
6	rs9257770	0	29431817	C	A	602	rs9257770_C	12248.3	12239.6	0.00103777	0.00166564	0.0054588	0.00111359	0.00814312	0.0104544	0.00314584	0.00288007
6	rs6930033	0	29431884	C	A	603	rs6930033_C	12248.3	12245.1	0.0224804	0.0067158	0.026053	0.0368972	0.00856876	0.00962174	0.0242008	0.0683763
6	rs4713210	0	29433412	A	G	604	rs4713210_A	12248.3	12249.8	0.456604	0.383584	0.345407	0.258771	0.357541	0.459806	0.221113	0.191333
6	rs9257775	0	29435058	G	A	605	rs9257775_G	12247.8	12249.8	0.910217	0.396122	0.337783	0.440204	0.806401	0.750647	0.731223	0.719095
6	rs9257792	0	29442418	G	A	606	rs9257792_G	12248.3	12240.4	0.00164972	0.00251743	0.00542246	0.00073042	0.00983661	0.0149158	0.00290827	0.00262956
6	rs9257793	0	29443133	G	A	607	rs9257793_G	12248.3	12244.8	0.0184456	1.50511e-07	0.416287	0.000187283	0.0711074	0.00457489	0.00225338	0.00939178
6	rs16894773	0	29443461	A	G	608	rs16894773_A	12248.3	12250.3	0.970523	0.668046	0.669703	0.947159	0.522044	0.81982	0.849927	0.882679
6	rs9380120	0	29443516	G	A	609	rs9380120_G	12248.3	12249.7	0.432677	0.366174	0.308376	0.239809	0.32396	0.426799	0.200965	0.173088
6	rs9257794	0	29443640	A	G	610	rs9257794_A	12245.3	12246.2	0.314641	0.00743051	0.884867	0.0437096	0.561224	0.315262	0.185716	0.141117
6	rs6934993	0	29445479	G	A	611	rs6934993_G	12248.3	12249.2	0.284698	0.00634359	0.929484	0.0382944	0.524217	0.290088	0.168314	0.127426
6	rs4713213	0	29446941	G	A	612	rs4713213_G	12247	12249	0.989547	0.32097	0.324026	0.546383	0.830708	0.726036	0.767514	0.793208
6	rs9257799	0	29447250	G	A	613	rs9257799_G	12248.3	12247	0.0689462	0.0510907	0.05418	0.0296045	0.066238	0.104471	0.0300843	0.024493
6	rs10807053	0	29448564	C	G	614	rs10807053_C	12248.3	12250.3	0.803618	0.230354	0.461513	0.40771	0.957306	0.526277	0.567392	0.579692
6	rs9257800	0	29448722	A	G	615	rs9257800_A	12244.8	12237.3	0.0020405	4.60546e-10	0.163738	2.0827e-06	0.016597	0.000503159	0.000131943	0.00084475
6	rs7772982	0	29448986	G	A	616	rs7772982_G	12247	12243.1	0.0148953	0.00438214	0.0124615	0.00634287	0.0110153	0.0230378	0.00723413	0.00602886
6	rs7753474	0	29449287	A	G	617	rs7753474_A	12248.3	12244.3	0.0141237	0.00408888	0.011816	0.00595738	0.0104288	0.021934	0.00679156	0.00566789
6	rs7774029	0	29449602	G	A	618	rs7774029_G	12247.1	12245.8	0.0681732	0.0235034	0.0722565	0.0745992	0.0390927	0.051822	0.0677406	0.0660789
6	rs9380122	0	29450215	G	A	619	rs9380122_G	12247.9	12249.8	0.880667	0.604372	0.564587	0.843319	0.435837	0.702858	0.756091	0.785422
6	rs3749971	0	29450754	A	G	620	rs3749971_A	12247.8	12241.6	0.0041642	2.1369e-09	0.227137	7.26012e-06	0.0275479	0.00107682	0.000331467	0.00176216
6	rs5003264	0	29451968	A	C	621	rs5003264_A	12248.3	12249.8	0.483293	0.93164	0.091653	0.906896	0.29897	0.679998	0.67713	0.652621
6	rs238883	0	29454205	G	A	622	rs238883_G	12248.3	12249.2	0.280996	0.0467973	0.233726	0.174063	0.270944	0.213164	0.18584	0.306262
6	rs9257805	0	29454308	G	A	623	rs9257805_G	12248.3	12243.1	0.00718122	1.87799e-08	0.248767	4.84539e-05	0.0312638	0.00141729	0.000725526	0.00314409
6	rs238881	0	29454968	G	A	624	rs238881_G	12248.3	12250.3	0.900847	0.498301	0.23795	0.659045	0.573543	0.981739	0.927745	0.944871
6	rs238880	0	29455023	A	G	625	rs238880_A	12236.8	12238.3	0.465419	0.978971	0.0841076	0.87087	0.285659	0.654228	0.645906	0.627908
6	rs3129688	0	29456276	G	A	626	rs3129688_G	12248.3	12249.7	0.414784	0.79153	0.474519	0.398834	0.597078	0.319901	0.162843	0.247104
6	rs3117442	0	29457070	G	A	627	rs3117442_G	12248.3	12250.3	0.933085	0.473243	0.252641	0.631786	0.595937	0.955776	0.897707	0.914695
6	rs238876	0	29457588	A	G	628	rs238876_A	12247.8	12249.2	0.434566	0.973301	0.0762283	0.835333	0.262972	0.614521	0.611798	0.590542
6	rs1419640	0	29458833	C	A	629	rs1419640_C	12248.3	12250.3	0.99389	0.452354	0.208046	0.557863	0.461909	0.981901	0.879572	0.910562
6	rs238873	0	29459620	G	A	630	rs238873_G	12248.3	12242.8	0.00601704	0.00347397	0.0133013	0.007552	0.0201649	0.0287686	0.0132143	0.0118211
6	rs238872	0	29459852	G	A	631	rs238872_G	12248.3	12249.9	0.535001	0.947692	0.0696262	0.975395	0.20994	0.641581	0.680122	0.645248
6	rs3117444	0	29460922	A	G	632	rs3117444_A	12248.3	12249.8	0.478095	0.97927	0.0597078	0.904327	0.18633	0.585802	0.632654	0.600654
6	rs3129681	0	29462362	G	A	633	rs3129681_G	12248.3	12249.9	0.492299	0.99137	0.0618385	0.919161	0.191714	0.59595	0.644316	0.610886
6	rs3094552	0	29462600	A	G	634	rs3094552_A	12248.3	12249.8	0.491876	0.988023	0.062635	0.922914	0.192493	0.597714	0.648069	0.616714
6	rs3094551	0	29462778	A	G	635	rs3094551_A	12248.3	12249.4	0.340126	0.99212	0.0326802	0.85431	0.0695549	0.453774	0.566829	0.453711
6	rs3094550	0	29462788	C	A	636	rs3094550_C	12247.8	12248.7	0.294528	0.945249	0.0259721	0.789713	0.0568583	0.403882	0.51208	0.403688
6	rs238869	0	29463092	G	A	637	rs238869_G	12248.3	12250.3	0.962927	0.472221	0.242023	0.448044	0.462517	0.931204	0.727938	0.738049
6	rs3094549	0	29463127	C	A	638	rs3094549_C	12243	12237.5	0.00604241	0.000226045	0.0032474	0.00280766	0.000484073	0.00180722	0.0021964	0.00314631
6	rs3094548	0	29463181	G	C	639	rs3094548_G	12243.7	12245.6	0.754021	0.638002	0.125239	0.681168	0.334923	0.868241	0.954617	0.873494
6	rs11966698	0	29463217	A	G	640	rs11966698_A	12248.3	12250.3	0.867753	0.860906	0.777441	0.917344	0.626961	0.590533	0.661353	0.552555
6	rs1419639	0	29463473	C	A	641	rs1419639_C	12247.8	12242.6	0.00707347	0.00109637	0.0246938	0.00756365	0.0178465	0.022495	0.01103	0.0148
6	rs1419638	0	29463498	A	G	642	rs1419638_A	12248.3	12245.9	0.0358687	0.0650641	0.00323024	0.13816	0.0105364	0.172649	0.0549076	0.103919
6	rs1419637	0	29463537	T	A	643	rs1419637_T	12248.3	12248.3	0.154154	0.247165	0.0324079	0.481018	0.0905156	0.610359	0.297475	0.489984
6	rs1419635	0	29463897	G	A	644	rs1419635_G	12237.1	12238.1	0.311224	0.406636	0.0657608	0.709518	0.362418	0.949426	0.420448	0.744541
6	rs4711185	0	29464025	A	G	645	rs4711185_A	12245.1	12245.6	0.230293	0.284562	0.063755	0.664721	0.345098	0.845093	0.459762	0.808528
6	rs9380123	0	29464097	A	G	646	rs9380123_A	12245.6	12246.3	0.240841	0.321949	0.0443731	0.593798	0.278161	0.821749	0.329288	0.627878
6	rs9257809	0	29464310	G	A	647	rs9257809_G	12248.3	12239.7	0.00111121	1.07339e-10	0.124449	7.38706e-07	0.0114046	0.000236926	7.06209e-05	0.000494453
6	rs379157	0	29464566	G	A	648	rs379157_G	12247.8	12249.6	0.657162	0.180708	0.448028	0.272173	0.712669	0.698928	0.450804	0.456606
6	rs442694	0	29464666	A	C	649	rs442694_A	12248.3	12241.4	0.00277629	3.67738e-10	0.206136	2.81454e-06	0.0229983	0.00063914	0.000182865	0.0011675
6	rs9257812	0	29465000	A	G	650	rs9257812_A	12245.2	12245.3	0.170408	0.333303	0.0448459	0.660318	0.159341	0.73804	0.437984	0.680932
6	rs9393956	0	29465624	G	A	651	rs9393956_G	12248.3	12244.6	0.0169934	0.00189187	0.0501211	0.0208719	0.029962	0.0401252	0.0237232	0.0288532
6	rs1592404	0	29466655	C	G	652	rs1592404_C	12248.3	12249.3	0.303346	0.39215	0.0622828	0.688983	0.345064	0.928746	0.402482	0.724857
6	rs9257819	0	29468162	C	A	653	rs9257819_C	12248.3	12248.5	0.178506	0.341576	0.0480901	0.681486	0.16924	0.762652	0.454242	0.698831
6	rs9257820	0	29468248	A	C	654	rs9257820_A	12248.3	12248.3	0.157397	0.307706	0.042403	0.641556	0.154289	0.720267	0.42559	0.664028
6	rs3128850	0	29469012	G	A	655	rs3128850_G	12248.3	12249.8	0.464472	0.719574	0.540001	0.444068	0.760802	0.422277	0.181635	0.282106
6	rs2022077	0	29469103	T	A	656	rs2022077_T	12247.7	12247.9	0.174355	0.334434	0.0465635	0.672261	0.16488	0.753709	0.446757	0.689629
6	rs16894836	0	29469686	C	A	657	rs16894836_C	12247.9	12249.9	0.794096	0.706548	0.916878	0.583721	0.810971	0.834311	0.493931	0.566666
6	rs9257823	0	29469714	A	G	658	rs9257823_A	12240.4	12240.5	0.165105	0.320999	0.0426874	0.654178	0.152763	0.720367	0.430968	0.669683
6	rs7753592	0	29470047	T	A	659	rs7753592_T	12248.3	12249.1	0.270775	0.37908	0.239818	0.313998	0.15197	0.127992	0.177331	0.155551
6	rs9257825	0	29470675	G	A	660	rs9257825_G	12229.2	12229.3	0.171471	0.331063	0.0459723	0.667232	0.162228	0.748332	0.446129	0.690848
6	rs9257828	0	29471676	A	G	661	rs9257828_A	12244.7	12244	0.0984781	0.221449	0.0230093	0.490351	0.0872153	0.505786	0.282977	0.470267
6	rs4713217	0	29472304	G	A	662	rs4713217_G	12248.3	12248.4	0.162053	0.315341	0.042215	0.641132	0.15294	0.723173	0.423469	0.662443
6	rs9257834	0	29472594	A	C	663	rs9257834_A	12248.3	12248.3	0.160217	0.310853	0.041387	0.63622	0.150926	0.717713	0.419404	0.656879
6	rs2073154	0	29472794	G	C	664	rs2073154_G	12236.7	12236.6	0.155998	0.302218	0.0400989	0.627439	0.14619	0.707631	0.410851	0.645135
6	rs2073151	0	29472930	A	G	665	rs2073151_A	12247.7	12247.8	0.162992	0.31577	0.0425343	0.646541	0.154838	0.726732	0.428087	0.667354
6	rs2073149	0	29473402	T	A	666	rs2073149_T	12247.2	12248.3	0.361682	0.740421	0.126543	0.929146	0.31091	0.997793	0.755815	0.965922
6	rs7770882	0	29473624	A	G	667	rs7770882_A	12247.8	12249	0.356479	0.736163	0.123933	0.934832	0.306258	0.995589	0.749981	0.971289
6	rs4713218	0	29473953	A	G	668	rs4713218_A	12247.8	12248	0.176194	0.338619	0.0470332	0.675781	0.166628	0.756628	0.449319	0.692374
6	rs1028411	0	29475378	C	A	669	rs1028411_C	12248.3	12248.5	0.173689	0.33359	0.046288	0.669927	0.16422	0.751111	0.444859	0.687536
6	rs4713220	0	29475477	A	T	670	rs4713220_A	12245.3	12245.3	0.152711	0.300954	0.0407203	0.630235	0.148643	0.705251	0.416498	0.653597
6	rs9257837	0	29476000	A	G	671	rs9257837_A	12248.3	12249.8	0.485424	0.761301	0.583622	0.836179	0.392064	0.656385	0.900938	0.832828
6	rs9257843	0	29476644	G	A	672	rs9257843_G	12248.3	12249.4	0.340653	0.709885	0.11786	0.954767	0.288681	0.965114	0.731284	0.991524
6	rs9405124	0	29476792	G	A	673	rs9405124_G	12246.5	12247.3	0.273548	0.358994	0.0537963	0.644665	0.313234	0.881357	0.370138	0.683011
6	rs2394604	0	29477247	A	C	674	rs2394604_A	12248.3	12250	0.596521	0.843761	0.709202	0.973108	0.497007	0.797958	0.960211	0.964469
6	rs2394607	0	29477498	G	A	675	rs2394607_G	12247.7	12246.9	0.0951581	0.218036	0.0219422	0.482598	0.0833132	0.494983	0.277889	0.461905
6	rs1419634	0	29477651	A	C	676	rs1419634_A	12245.3	12245.2	0.142432	0.288297	0.0374135	0.605559	0.138358	0.677084	0.397965	0.627899
6	rs1362061	0	29479144	G	C	677	rs1362061_G	12248.3	12249.2	0.292153	0.381817	0.0596585	0.676952	0.334791	0.915035	0.391686	0.708892
6	rs429479	0	29480302	G	A	678	rs429479_G	12243.2	12232.7	0.000412765	1.56436e-11	0.0715769	1.89166e-07	0.00495428	7.19858e-05	2.23496e-05	0.000181904
6	rs2394608	0	29480408	G	A	679	rs2394608_G	12248.3	12250.3	0.886461	0.904799	0.293978	0.643526	0.843896	0.524897	0.97267	0.645018
6	rs1419632	0	29481228	C	A	680	rs1419632_C	12248.3	12249.4	0.340919	0.716532	0.120233	0.955482	0.301136	0.970487	0.735294	0.974999
6	rs406511	0	29484364	C	G	681	rs406511_C	12244.2	12234.1	0.000524547	2.42834e-11	0.0823673	2.74249e-07	0.00611826	9.88037e-05	2.89029e-05	0.000230142
6	rs12192194	0	29487870	G	A	682	rs12192194_G	12248.3	12250.1	0.653534	0.90865	0.223666	0.782321	0.677276	0.721442	0.822958	0.799861
6	rs1544403	0	29489885	G	A	683	rs1544403_G	12248.3	12244.9	0.020372	0.00236771	0.0594382	0.0243388	0.0350392	0.0451654	0.0279305	0.0343119
6	rs720497	0	29490412	C	G	684	rs720497_C	12151.6	12153.5	0.701529	0.0986386	0.852982	0.208385	0.368653	0.103583	0.454253	0.371987
6	rs1362073	0	29491299	A	G	685	rs1362073_A	12248.3	12250.1	0.626195	0.877236	0.207644	0.814102	0.645044	0.754906	0.791341	0.832229
6	rs16894861	0	29491373	A	G	686	rs16894861_A	12248.3	12250.1	0.676924	0.940424	0.552146	0.558645	0.523573	0.50561	0.515592	0.544694
6	rs10807055	0	29492110	G	A	687	rs10807055_G	12248.3	12250.1	0.65259	0.906863	0.223413	0.785083	0.677401	0.722241	0.820814	0.802027
6	rs3131024	0	29493216	A	G	688	rs3131024_A	12247.8	12249.8	0.82934	0.399889	0.638268	0.941077	0.254176	0.408215	0.815169	0.580862
6	rs1011985	0	29493751	G	C	689	rs1011985_G	12248.3	12247.9	0.122537	0.0135749	0.122818	0.212002	0.0239493	0.0546103	0.278016	0.447782
6	rs16894876	0	29494728	A	G	690	rs16894876_A	12248.3	12250.1	0.676924	0.940424	0.552146	0.558645	0.523573	0.50561	0.515592	0.544694
6	rs3094562	0	29496285	G	A	691	rs3094562_G	12244.3	12246	0.59019	0.0994964	0.487154	0.494615	0.306188	0.297781	0.506263	0.725678
6	rs2523421	0	29498419	G	A	692	rs2523421_G	12248.3	12247.1	0.0738882	0.0127319	0.167802	0.0767935	0.237469	0.212583	0.104207	0.248467
6	rs1419643	0	29499915	C	A	693	rs1419643_C	12248.3	12250.1	0.641795	0.0769036	0.912076	0.177587	0.329606	0.0887559	0.405181	0.337347
6	rs2746148	0	29500951	G	A	694	rs2746148_G	12248.3	12249.2	0.288536	0.152154	0.440789	0.30447	0.641276	0.506941	0.391725	0.729231
6	rs2074470	0	29502406	G	A	695	rs2074470_G	12247.7	12249.6	0.685819	0.133162	0.575023	0.583204	0.370126	0.360948	0.599877	0.838088
6	rs9257857	0	29502905	A	G	696	rs9257857_A	12247.5	12248.7	0.383589	0.647046	0.469838	0.694367	0.307562	0.526151	0.774633	0.7149
6	rs16894900	0	29503478	G	C	697	rs16894900_G	12247.7	12240.5	0.00244909	0.00178162	0.00543594	0.00256345	0.00874678	0.00990745	0.00492361	0.00537049
6	rs7770592	0	29503726	A	C	698	rs7770592_A	12245.7	12247.4	0.629803	0.882407	0.210419	0.810729	0.659101	0.74213	0.794486	0.831994
6	rs7757269	0	29504196	G	A	699	rs7757269_G	12248.3	12248.6	0.195585	0.304064	0.181304	0.233364	0.127628	0.0880895	0.129332	0.132465
6	rs10946990	0	29504625	G	A	700	rs10946990_G	12248.3	12249.2	0.290201	0.375678	0.0596116	0.674181	0.335818	0.914538	0.390074	0.712664
6	rs7349908	0	29505500	A	T	701	rs7349908_A	12247	12247.9	0.28409	0.363927	0.0575581	0.663349	0.327135	0.90159	0.380533	0.697371
6	rs3131025	0	29506794	A	G	702	rs3131025_A	12248.3	12250.1	0.610069	0.10706	0.500657	0.508308	0.315623	0.308073	0.522629	0.744731
6	rs16894908	0	29510414	A	G	703	rs16894908_A	12248.3	12245.4	0.0261263	0.021175	0.00908771	0.00666656	0.0238513	0.038788	0.00634867	0.00544915
6	rs6908560	0	29511251	A	G	704	rs6908560_A	12247.9	12249.7	0.640758	0.669072	0.973887	0.844657	0.703949	0.638118	0.966342	0.937701
6	rs3094561	0	29512136	A	C	705	rs3094561_A	12245.1	12247.1	0.92787	0.253938	0.421458	0.625821	0.630184	0.292893	0.894717	0.874718
6	rs9468532	0	29515357	G	A	706	rs9468532_G	12248.3	12250.2	0.784022	0.333222	0.932739	0.927595	0.944364	0.821312	0.739831	0.904788
6	rs6933601	0	29515581	A	G	707	rs6933601_A	12248.3	12249.9	0.525778	0.950105	0.377924	0.29159	0.452275	0.519384	0.29861	0.260989
6	rs116162459	0	29515934	A	G	708	rs116162459_A	12248.3	12250.3	0.882437	0.923136	0.724036	0.931191	0.962974	0.89525	0.801443	0.793084
6	rs2074469	0	29515949	G	A	709	rs2074469_G	12248.3	12250.1	0.657117	0.968983	0.763589	0.869152	0.628075	0.80982	0.904041	0.859706
6	rs11755177	0	29515954	A	G	710	rs11755177_A	12243.3	12244.8	0.461855	0.815571	0.868367	0.875687	0.881286	0.757475	0.856816	0.881122
6	rs11755182	0	29516036	A	C	711	rs11755182_A	12247.8	12249.6	0.644468	0.965307	0.645557	0.888754	0.895012	0.974679	0.626039	0.647265
6	rs2074468	0	29516249	A	G	712	rs2074468_A	12247.8	12244.6	0.0222923	0.00475777	0.00991975	0.0102531	0.0253827	0.0378102	0.00872553	0.00852949
6	rs2074466	0	29516292	A	C	713	rs2074466_A	12248.3	12250	0.544535	0.819857	0.649216	0.913616	0.445507	0.72401	0.983825	0.915336
6	rs10946991	0	29516533	C	A	714	rs10946991_C	12246.3	12242.2	0.0140258	0.00297241	0.00610274	0.00621095	0.0173737	0.0259253	0.00598377	0.00597395
6	rs11968123	0	29516700	C	A	715	rs11968123_C	12248.3	12250.3	0.870992	0.852235	0.510741	0.683314	0.792888	0.845646	0.5741	0.571578
6	rs10946992	0	29518680	G	A	716	rs10946992_G	12247.7	12244.7	0.0246413	0.0201713	0.00809306	0.00606093	0.0225003	0.0364008	0.00591765	0.00504238
6	rs1535039	0	29519411	G	A	717	rs1535039_G	12247.8	12241	0.00294905	3.66545e-10	0.213621	2.89273e-06	0.0244363	0.000683255	0.000187604	0.00121561
6	rs16894919	0	29520201	A	C	718	rs16894919_A	12247.7	12244	0.0171718	0.0177722	0.00537199	0.00407864	0.0158249	0.0252987	0.00410918	0.00419835
6	rs7738742	0	29522325	G	A	719	rs7738742_G	12248.3	12249.6	0.388619	0.753501	0.269365	0.200859	0.337154	0.39629	0.203935	0.174025
6	rs7739243	0	29522592	G	A	720	rs7739243_G	12247.8	12244.1	0.0162567	0.012685	0.00514547	0.00372067	0.015332	0.0254974	0.00361125	0.00302765
6	rs2523443	0	29523443	A	C	721	rs2523443_A	12248.3	12241.2	0.00251244	2.67318e-10	0.196635	2.27525e-06	0.021736	0.000581157	0.000155026	0.0010258
6	rs6906897	0	29523615	A	G	722	rs6906897_A	12247.8	12244.1	0.0162567	0.012685	0.00514547	0.00372067	0.015332	0.0254974	0.00361125	0.00302765
6	rs6929603	0	29523631	G	A	723	rs6929603_G	12248.3	12250.1	0.656405	0.379352	0.224493	0.341173	0.314225	0.353895	0.213973	0.230932
6	rs6935708	0	29524631	G	A	724	rs6935708_G	12248.3	12248.5	0.175894	0.403312	0.118721	0.0801733	0.177001	0.204616	0.0914101	0.0762533
6	rs2523442	0	29525796	G	A	725	rs2523442_G	12247.8	12245.2	0.0315065	0.00344161	0.0997438	0.0252608	0.243926	0.253022	0.0214881	0.071745
6	rs7738548	0	29529188	A	G	726	rs7738548_A	12248.3	12243.7	0.00982882	0.0147855	0.00620491	0.00366825	0.0191094	0.0291047	0.00536375	0.00447333
6	rs3094574	0	29530071	A	G	727	rs3094574_A	12247.2	12249.2	0.984713	0.251421	0.430541	0.629412	0.620255	0.290377	0.922215	0.847308
6	rs2523440	0	29530222	G	A	728	rs2523440_G	12248.3	12250.3	0.969049	0.872269	0.990663	0.946459	0.982536	0.994092	0.911223	0.991309
6	rs9257863	0	29533563	C	A	729	rs9257863_C	12248.3	12249.8	0.477852	0.76825	0.577037	0.825024	0.389464	0.637923	0.90523	0.842894
6	rs3117194	0	29533987	A	G	730	rs3117194_A	12244.4	12246.4	0.969281	0.323216	0.344682	0.724176	0.733465	0.3576	0.783497	0.983812
6	rs6456951	0	29534182	A	T	731	rs6456951_A	12248.3	12243.7	0.00982882	0.0147855	0.00620491	0.00366825	0.0191094	0.0291047	0.00536375	0.00447333
6	rs2523439	0	29535499	A	G	732	rs2523439_A	12246.9	12245.9	0.0827784	0.0106623	0.216428	0.0646986	0.449719	0.453266	0.0555821	0.158822
6	rs2021729	0	29537371	A	G	733	rs2021729_A	12248.3	12247.2	0.0765625	0.00963518	0.203059	0.060854	0.422181	0.426752	0.0511736	0.149083
6	rs2073148	0	29538149	G	A	734	rs2073148_G	12248.3	12242.9	0.00660343	0.0129389	0.00402918	0.00240403	0.0132052	0.0197852	0.00365783	0.00368979
6	rs3128854	0	29539677	A	G	735	rs3128854_A	12234.7	12236.7	0.911728	0.357303	0.309531	0.779144	0.786021	0.395477	0.730974	0.962785
6	rs1345228	0	29540369	G	A	736	rs1345228_G	12248.3	12249.9	0.494471	0.641899	0.663109	0.766452	0.58327	0.826596	0.922702	0.763141
6	rs2107192	0	29541921	A	G	737	rs2107192_A	12247.8	12246.7	0.0784628	0.00983651	0.207312	0.0621212	0.43153	0.435173	0.0519677	0.150916
6	rs2107191	0	29542274	G	A	738	rs2107191_G	12248.3	12250.3	0.974159	0.316782	0.349405	0.719109	0.725215	0.353155	0.792519	0.972223
6	rs4713226	0	29542393	A	G	739	rs4713226_A	12248.3	12250.3	0.804181	0.841122	0.924721	0.983418	0.992879	0.918024	0.869069	0.788201
6	rs2746149	0	29543334	G	A	740	rs2746149_G	12247.6	12240.5	0.00245689	4.5473e-10	0.20845	2.51182e-06	0.0249126	0.000653351	0.000194567	0.00122275
6	rs11961170	0	29547084	T	A	741	rs11961170_T	12248.3	12243.6	0.00976065	0.00458403	0.00850639	0.00695858	0.0231394	0.0317333	0.00966646	0.00940356
6	rs16894948	0	29548236	A	G	742	rs16894948_A	12248.3	12242.9	0.00660343	0.0129389	0.00402918	0.00240403	0.0132052	0.0197852	0.00365783	0.00368979
6	rs11966831	0	29548341	A	C	743	rs11966831_A	12130.1	12129.2	0.0880911	0.0733559	0.196275	0.12784	0.114102	0.08571	0.15022	0.159352
6	rs12206077	0	29548720	A	G	744	rs12206077_A	12248.3	12248.1	0.139124	0.205665	0.0165604	0.365023	0.151223	0.577094	0.173037	0.381039
6	rs1362077	0	29548967	A	G	745	rs1362077_A	12248.3	12249.6	0.394224	0.644435	0.374145	0.38757	0.406996	0.382655	0.414414	0.574233
6	rs1362076	0	29549148	A	C	746	rs1362076_A	12248.3	12250.2	0.679737	0.780864	0.370409	0.496388	0.62239	0.679641	0.434802	0.532082
6	rs7751705	0	29549597	A	G	747	rs7751705_A	12248.3	12249.9	0.513175	0.811915	0.265051	0.257083	0.472475	0.568163	0.241032	0.225041
6	rs2746150	0	29550680	A	G	748	rs2746150_A	12248.3	12241.3	0.0026664	2.99478e-10	0.203768	2.46428e-06	0.0226836	0.000619159	0.000165905	0.00109756
6	rs2523444	0	29550810	A	G	749	rs2523444_A	12247.9	12248	0.160874	0.0855794	0.256787	0.150173	0.383378	0.293522	0.207552	0.443475
6	rs7769924	0	29551905	G	A	750	rs7769924_G	12248.3	12249.9	0.493671	0.877615	0.240063	0.237887	0.411521	0.497895	0.21949	0.231388
6	rs1233495	0	29552100	A	G	751	rs1233495_A	12239	12233.7	0.0072455	2.56319e-06	0.210893	0.000522949	0.0421237	0.0106926	0.00764714	0.0131791
6	rs3094573	0	29554611	C	A	752	rs3094573_C	12248.3	12250.3	0.830726	0.400594	0.258834	0.888409	0.89523	0.475525	0.630145	0.848263
6	rs11963957	0	29554834	A	G	753	rs11963957_A	12248.3	12250.2	0.689953	0.628838	0.344668	0.503278	0.593041	0.662493	0.416	0.404445
6	rs7771335	0	29556017	G	A	754	rs7771335_G	12248.3	12249.9	0.493671	0.877615	0.240063	0.237887	0.411521	0.497895	0.21949	0.231388
6	rs17415601	0	29560390	G	A	755	rs17415601_G	12248.3	12250	0.553561	0.964826	0.578475	0.888107	0.252003	0.707032	0.846023	0.640305
6	rs10484547	0	29560753	C	G	756	rs10484547_C	12248.3	12249.4	0.348617	0.675748	0.161665	0.159702	0.315663	0.382461	0.152128	0.163072
6	rs2066951	0	29562468	C	A	757	rs2066951_C	12239.8	12241.5	0.559209	0.955183	0.278462	0.278759	0.46821	0.562486	0.257219	0.271354
6	rs9348832	0	29564000	A	G	758	rs9348832_A	12248.3	12247.7	0.102236	0.0140042	0.216021	0.108943	0.183002	0.210458	0.12115	0.129436
6	rs11756938	0	29564633	A	G	759	rs11756938_A	12248.3	12250.3	0.790265	0.540233	0.65909	0.689767	0.66541	0.535145	0.597639	0.603467
6	rs1233492	0	29566456	G	A	760	rs1233492_G	12248.3	12247	0.0683246	0.0090743	0.181104	0.0487801	0.37381	0.381786	0.0411404	0.122603
6	rs3128844	0	29567239	G	C	761	rs3128844_G	12248	12249.9	0.871993	0.378512	0.285646	0.852396	0.841293	0.432507	0.674763	0.899429
6	rs1233491	0	29569709	C	G	762	rs1233491_C	12248.3	12241.2	0.00256508	2.69553e-10	0.200795	2.30845e-06	0.022034	0.000591598	0.000158686	0.00105683
6	rs1233490	0	29569893	G	A	763	rs1233490_G	12248.3	12247	0.0686367	0.00906053	0.181178	0.0478661	0.379325	0.38526	0.0412108	0.121763
6	rs1233489	0	29571022	A	T	764	rs1233489_A	12248	12240.5	0.00205598	1.84298e-10	0.177481	1.66868e-06	0.0183184	0.000459994	0.000125959	0.000858126
6	rs6906307	0	29571871	C	A	765	rs6906307_C	12241.6	12243.4	0.617105	0.939597	0.337621	0.330822	0.551478	0.662409	0.298483	0.277718
6	rs2746147	0	29574587	A	G	766	rs2746147_A	12248.3	12247.4	0.084755	0.0123358	0.214428	0.0605681	0.433878	0.440898	0.0525041	0.149149
6	rs1345227	0	29574935	G	A	767	rs1345227_G	12245.6	12246.2	0.231024	0.68496	0.0528113	0.412727	0.468956	0.929948	0.1606	0.283145
6	rs7766082	0	29575985	G	A	768	rs7766082_G	12248.3	12250.1	0.650226	0.98561	0.341067	0.334778	0.547107	0.659477	0.303933	0.283101
6	rs7746192	0	29576186	A	G	769	rs7746192_A	12239.5	12240.8	0.397249	0.327906	0.736176	0.530617	0.453143	0.361569	0.612282	0.658291
6	rs1233487	0	29576788	G	A	770	rs1233487_G	12248.3	12243.4	0.00857028	3.28841e-06	0.233062	0.000669038	0.0481818	0.0125439	0.00882722	0.0150538
6	rs9257873	0	29576947	C	A	771	rs9257873_C	12248	12249.6	0.498858	0.799088	0.603212	0.856634	0.413695	0.672092	0.933578	0.869658
6	rs1233486	0	29577631	A	G	772	rs1233486_A	12246.9	12245.7	0.0719559	0.00945473	0.191184	0.0518312	0.392748	0.402311	0.0441595	0.129094
6	rs1234843	0	29577919	G	A	773	rs1234843_G	12240.9	12240.3	0.109038	0.017953	0.224893	0.0736413	0.491433	0.521474	0.0596424	0.159383
6	rs1233485	0	29578187	G	A	774	rs1233485_G	12200.5	12199.2	0.0703524	0.0143599	0.138178	0.0371021	0.347919	0.382736	0.0293907	0.0883634
6	rs3131019	0	29578964	C	A	775	rs3131019_C	12247.8	12248.2	0.205382	0.584496	0.0555791	0.39717	0.439288	0.861243	0.157	0.278567
6	rs16894986	0	29579851	G	C	776	rs16894986_G	12248	12249.3	0.394402	0.64465	0.374306	0.387734	0.407173	0.382835	0.414567	0.574885
6	rs11961013	0	29579913	A	G	777	rs11961013_A	12248.3	12248.6	0.193124	0.266575	0.177163	0.236029	0.124714	0.0861887	0.125716	0.129652
6	rs757256	0	29580895	A	G	778	rs757256_A	12244.6	12244.5	0.150928	0.667687	0.0673789	0.616385	0.339804	0.916727	0.339475	0.491028
6	rs3130858	0	29581480	C	A	779	rs3130858_C	12247.7	12249.2	0.47726	0.686213	0.53744	0.441518	0.74613	0.430878	0.177316	0.260839
6	rs734959	0	29582641	G	A	780	rs734959_G	12212.2	12212.4	0.175451	0.555123	0.0443459	0.348255	0.390116	0.796069	0.133777	0.240662
6	rs734961	0	29583018	A	C	781	rs734961_A	12239.5	12241.3	0.647713	0.947311	0.757704	0.956916	0.530648	0.830635	0.902981	0.97893
6	rs734960	0	29583121	A	G	782	rs734960_A	12206.9	12208.7	0.625076	0.933561	0.735611	0.983312	0.506146	0.80514	0.931854	0.991441
6	rs1233482	0	29583661	A	C	783	rs1233482_A	12244.7	12243.4	0.0676765	0.00863859	0.182158	0.0478687	0.373411	0.378354	0.0406701	0.121195
6	rs3131020	0	29583881	A	G	784	rs3131020_A	12247.8	12247.8	0.149458	0.670623	0.0658634	0.603816	0.329802	0.902059	0.328079	0.478809
6	rs3131021	0	29584121	A	G	785	rs3131021_A	12247.4	12248.2	0.278276	0.741164	0.107935	0.605495	0.622654	0.934349	0.296871	0.48431
6	rs3128847	0	29584304	A	G	786	rs3128847_A	12246	12248	0.889798	0.338606	0.680656	0.987171	0.428182	0.62143	0.791716	0.67338
6	rs9257877	0	29584487	A	C	787	rs9257877_A	12248.3	12250.2	0.737556	0.753894	0.858643	0.970856	0.916619	0.828233	0.931102	0.870295
6	rs3131022	0	29584663	C	G	788	rs3131022_C	12240.6	12239.6	0.0853415	0.560014	0.0331005	0.396383	0.177598	0.63221	0.21678	0.309495
6	rs1557820	0	29585219	A	G	789	rs1557820_A	12248	12247.1	0.088582	0.551536	0.0379127	0.401068	0.241851	0.744046	0.212857	0.317488
6	rs1557819	0	29585252	C	A	790	rs1557819_C	12248.3	12247.4	0.0892421	0.568912	0.0382484	0.398024	0.241804	0.74757	0.213607	0.319334
6	rs4959120	0	29585274	C	G	791	rs4959120_C	12246.6	12248.5	0.792364	0.688276	0.667957	0.577429	0.591864	0.639062	0.45719	0.411748
6	rs1233480	0	29585393	A	G	792	rs1233480_A	12248.3	12244	0.0118843	1.34545e-08	0.407842	5.86827e-05	0.0690028	0.00304082	0.00168645	0.00879629
6	rs2158281	0	29585762	G	C	793	rs2158281_G	12247.1	12246.2	0.0870778	0.561376	0.0373315	0.392473	0.23862	0.740962	0.210089	0.313969
6	rs9357082	0	29585836	G	A	794	rs9357082_G	12248.3	12244.4	0.0151349	0.00190893	0.0462588	0.0186385	0.0279228	0.0364222	0.0216401	0.0267713
6	rs2285792	0	29586149	G	A	795	rs2285792_G	12247.3	12248.9	0.537029	0.843618	0.643363	0.919826	0.439768	0.713618	0.983805	0.905905
6	rs2285791	0	29586280	A	G	796	rs2285791_A	12248.3	12249.8	0.468505	0.841658	0.664284	0.900054	0.464799	0.717807	0.97547	0.938184
6	rs3094572	0	29588972	A	G	797	rs3094572_A	12248.3	12248.6	0.194392	0.619716	0.0558589	0.379549	0.443034	0.859452	0.157141	0.282184
6	rs2523433	0	29590411	A	G	798	rs2523433_A	12247.8	12246.9	0.0888071	0.0205379	0.195926	0.0747436	0.324837	0.350136	0.0547921	0.18393
6	rs1592412	0	29591818	A	C	799	rs1592412_A	12248.3	12248.9	0.231551	0.682559	0.0692085	0.442637	0.49691	0.923726	0.186412	0.324769
6	rs1592410	0	29591947	A	G	800	rs1592410_A	12248.3	12247.9	0.116369	0.617352	0.0509959	0.475423	0.290633	0.837418	0.255247	0.361712
6	rs1015869	0	29592645	A	G	801	rs1015869_A	12247.8	12247.4	0.119585	0.620719	0.0523551	0.484485	0.295734	0.845388	0.261137	0.367483
6	rs9257887	0	29593268	A	G	802	rs9257887_A	12248.3	12250.1	0.612243	0.92528	0.840011	0.926866	0.620164	0.911421	0.802006	0.915406
6	rs2189372	0	29594044	G	A	803	rs2189372_G	12247.8	12247.3	0.111561	0.604668	0.0483912	0.458291	0.280943	0.821532	0.247808	0.34919
6	rs2859876	0	29594194	C	G	804	rs2859876_C	12248.3	12247.9	0.122919	0.629455	0.0541893	0.492509	0.30323	0.858799	0.26733	0.37482
6	rs3094564	0	29594324	G	A	805	rs3094564_G	12248.3	12248.8	0.215383	0.656334	0.0625593	0.412663	0.470822	0.892202	0.173363	0.303466
6	rs16894996	0	29594592	A	G	806	rs16894996_A	12246.6	12248.1	0.482161	0.740921	0.458756	0.479686	0.486932	0.466925	0.515039	0.70572
6	rs9257890	0	29594887	A	G	807	rs9257890_A	12248.3	12249.9	0.495327	0.790361	0.605122	0.863698	0.412766	0.683191	0.935373	0.862687
6	rs2745400	0	29596228	A	G	808	rs2745400_A	12246	12240.2	0.00524852	7.6133e-06	0.00944196	0.00128931	0.0183947	0.0357867	0.00147652	0.00783331
6	rs2523429	0	29596395	A	C	809	rs2523429_A	12248.3	12243.8	0.0108892	2.56692e-05	0.0333032	0.00357771	0.0745297	0.0810886	0.00547219	0.0226678
6	rs2745401	0	29596457	G	A	810	rs2745401_G	12247.3	12245.7	0.0568274	0.00092884	0.0796095	0.015032	0.180886	0.207951	0.0211347	0.0698632
6	rs3130855	0	29596555	A	C	811	rs3130855_A	12202.2	12203.3	0.348238	0.143763	0.246657	0.315992	0.124445	0.286205	0.414115	0.365034
6	rs1419644	0	29596616	T	A	812	rs1419644_T	12248.3	12250.3	0.90219	0.79109	0.57382	0.487614	0.691682	0.893243	0.517874	0.533486
6	rs724078	0	29597027	A	G	813	rs724078_A	12248.3	12244	0.0117666	0.00115994	0.0192632	0.00508974	0.0386913	0.0553621	0.00468535	0.0186139
6	rs7752486	0	29600542	A	C	814	rs7752486_A	12248.3	12245.9	0.0359467	0.0760906	0.0381416	0.0487024	0.0239511	0.0155873	0.0255833	0.0251226
6	rs969931	0	29602876	C	A	815	rs969931_C	12244.7	12239.7	0.00810657	2.283e-05	0.0286189	0.00293129	0.0587415	0.063423	0.00492389	0.0202175
6	rs2745406	0	29604062	G	A	816	rs2745406_G	12248.3	12243.7	0.00984056	3.61964e-05	0.0331833	0.00370882	0.0636595	0.0698349	0.00614768	0.0237954
6	rs6939431	0	29604199	A	G	817	rs6939431_A	12248.3	12249.6	0.406825	0.168847	0.643697	0.261239	0.93414	0.829205	0.448644	0.275042
6	rs1233427	0	29604643	A	G	818	rs1233427_A	12248.3	12242.5	0.00514486	1.38423e-05	0.0179307	0.00123574	0.0436306	0.0508702	0.00251657	0.0118861
6	rs9501676	0	29604755	A	G	819	rs9501676_A	12248.3	12247.5	0.0940495	0.170972	0.0902479	0.121355	0.0612756	0.0424651	0.0667396	0.0648243
6	rs9501677	0	29604981	A	G	820	rs9501677_A	12248.3	12249.5	0.35188	0.467875	0.308125	0.176614	0.426823	0.501512	0.262728	0.301898
6	rs1233426	0	29606081	A	G	821	rs1233426_A	12247.8	12241.9	0.00494759	1.3263e-05	0.0174142	0.00117702	0.0426437	0.0496554	0.00241511	0.0114989
6	rs1233425	0	29606476	G	C	822	rs1233425_G	12243.3	12238.8	0.0111127	3.50233e-05	0.0367682	0.00419993	0.0725681	0.0767157	0.0065056	0.0251741
6	rs1233424	0	29607168	A	G	823	rs1233424_A	12248	12249	0.314868	0.430757	0.16989	0.295261	0.193461	0.243228	0.2473	0.239234
6	rs362546	0	29607395	G	A	824	rs362546_G	12221.1	12213.2	0.00166475	3.41286e-06	0.00687562	0.000358746	0.019132	0.0223243	0.000809342	0.00440251
6	rs909968	0	29607484	A	G	825	rs909968_A	12240.7	12234.7	0.00486407	1.6495e-05	0.0171574	0.00118523	0.0398989	0.0472624	0.00253134	0.0117172
6	rs909967	0	29607516	G	A	826	rs909967_G	12229	12224.3	0.00941613	2.80543e-05	0.0319173	0.00351041	0.063674	0.0676332	0.00553033	0.0219051
6	rs886381	0	29608204	A	G	827	rs886381_A	12244.2	12243.6	0.106111	0.0168406	0.269357	0.0777761	0.489918	0.479535	0.0711453	0.185292
6	rs362544	0	29608266	G	A	828	rs362544_G	12170.2	12164.3	0.00493673	1.26938e-05	0.0171723	0.00152347	0.0378452	0.0410821	0.00249226	0.0114954
6	rs9468551	0	29608906	A	G	829	rs9468551_A	12248.3	12249.6	0.380692	0.508315	0.339363	0.196614	0.465944	0.547763	0.287635	0.334247
6	rs9968	0	29609016	C	G	830	rs9968_C	12244.7	12236.4	0.00134821	1.43832e-06	0.0075099	0.000205085	0.0275041	0.026962	0.000717994	0.00308811
6	rs2294748	0	29609161	A	G	831	rs2294748_A	12235.7	12237.7	0.978525	0.820632	0.986955	0.884298	0.961791	0.843071	0.962729	0.925434
6	rs16895022	0	29609199	A	G	832	rs16895022_A	12248.3	12246.2	0.0420391	0.074502	0.0360579	0.0349468	0.0370857	0.0340514	0.0370575	0.0697275
6	rs9461533	0	29609401	G	A	833	rs9461533_G	12248.3	12246.4	0.0471747	0.0872826	0.0449981	0.0665712	0.0278192	0.0179347	0.0346728	0.0297144
6	rs1233421	0	29609493	A	C	834	rs1233421_A	12248.3	12239.2	0.000865229	8.65926e-07	0.00502542	0.000136396	0.0176226	0.016361	0.00039565	0.00180013
6	rs6456964	0	29610107	A	G	835	rs6456964_A	12248.3	12249.3	0.314461	0.506697	0.278697	0.170369	0.347728	0.432009	0.273724	0.290067
6	rs1233420	0	29611302	G	A	836	rs1233420_G	12248.3	12242.7	0.00584928	6.78484e-06	0.0271833	0.00161776	0.0754038	0.0685263	0.00361802	0.0124667
6	rs6930217	0	29611761	G	A	837	rs6930217_G	12248.3	12250.3	0.962047	0.576846	0.960109	0.912591	0.879974	0.992365	0.773348	0.834295
6	rs419957	0	29613748	G	C	838	rs419957_G	12220.8	12213.4	0.00221289	2.60492e-06	0.0114802	0.000373654	0.0388694	0.0398476	0.00125585	0.00494828
6	rs3025672	0	29614014	A	G	839	rs3025672_A	12247	12249	0.896099	0.539367	0.881367	0.85317	0.962433	0.947803	0.711767	0.772256
6	rs414282	0	29614239	G	A	840	rs414282_G	12248.3	12243.8	0.0108899	2.97846e-05	0.021635	0.00207642	0.0536879	0.0702817	0.0032367	0.0146898
6	rs3025670	0	29614270	G	A	841	rs3025670_G	12248.3	12250.3	0.962047	0.576846	0.960109	0.912591	0.879974	0.992365	0.773348	0.834295
6	rs3025667	0	29615197	G	C	842	rs3025667_G	12248.3	12247.5	0.0940495	0.170972	0.0902479	0.121355	0.0612756	0.0424651	0.0667396	0.0648243
6	rs362514	0	29615289	A	G	843	rs362514_A	12248.3	12244.4	0.0146051	2.85488e-05	0.0588529	0.00429869	0.150331	0.150774	0.010911	0.0332728
6	rs446198	0	29615405	A	G	844	rs446198_A	12247.8	12241.1	0.00317888	4.28276e-06	0.015144	0.000553737	0.0515191	0.0508422	0.00174909	0.00685313
6	rs6931702	0	29615550	A	G	845	rs6931702_A	12248.3	12242.6	0.00560696	0.0262533	0.00357561	0.00132023	0.00554173	0.0058345	0.00152591	0.00197041
6	rs10484548	0	29616252	G	A	846	rs10484548_G	12248.3	12247.5	0.0940495	0.170972	0.0902479	0.121355	0.0612756	0.0424651	0.0667396	0.0648243
6	rs362540	0	29618304	G	A	847	rs362540_G	12247.8	12246.2	0.0548593	0.00034468	0.145409	0.0194021	0.285007	0.262029	0.0307441	0.0840618
6	rs362538	0	29618609	C	G	848	rs362538_C	12225.1	12226.7	0.509013	0.290302	0.0614296	0.481826	0.0445697	0.55112	0.170222	0.28165
6	rs1233417	0	29619829	G	A	849	rs1233417_G	12248.3	12248.8	0.220053	0.0245189	0.21068	0.0987589	0.227639	0.20841	0.159184	0.163006
6	rs426595	0	29620461	A	G	850	rs426595_A	12248.3	12245.5	0.0275658	0.000161689	0.0786787	0.00649031	0.182131	0.178012	0.0136406	0.0425639
6	rs407161	0	29621786	A	G	851	rs407161_A	12248.3	12246.4	0.0469877	0.000301458	0.128508	0.0166308	0.248954	0.231022	0.0276689	0.0742917
6	rs398616	0	29622209	A	G	852	rs398616_A	12248.3	12245.4	0.0270583	0.000156087	0.0775692	0.00634883	0.179805	0.176323	0.0133795	0.0419186
6	rs3094575	0	29623781	A	G	853	rs3094575_A	12248.3	12249	0.254303	0.0289041	0.265559	0.120281	0.292275	0.271826	0.194685	0.202113
6	rs3094576	0	29624221	A	C	854	rs3094576_A	12248.3	12250.2	0.773688	0.634955	0.912303	0.910471	0.86497	0.853844	0.734056	0.903077
6	rs376681	0	29625072	G	A	855	rs376681_G	12248.3	12241.5	0.0030084	3.33419e-06	0.0156848	0.000612888	0.0568842	0.0566082	0.00191996	0.00783442
6	rs365488	0	29625937	A	G	856	rs365488_A	12242.6	12237.8	0.00907765	1.25813e-05	0.0400336	0.00300063	0.113907	0.103405	0.00641256	0.0218207
6	rs2745411	0	29626421	A	G	857	rs2745411_A	12248	12245	0.0262727	9.45326e-05	0.0787779	0.0121828	0.14606	0.158502	0.0175697	0.0622899
6	rs417374	0	29626451	G	A	858	rs417374_G	12248.3	12243.2	0.007764	9.43015e-06	0.035668	0.00252698	0.102904	0.09277	0.00539789	0.0187679
6	rs6902738	0	29626458	G	A	859	rs6902738_G	12248.3	12250.3	0.962047	0.576846	0.960109	0.912591	0.879974	0.992365	0.773348	0.834295
6	rs9368606	0	29626644	C	A	860	rs9368606_C	12248.3	12249.4	0.33012	0.0909212	0.391043	0.175161	0.495306	0.311747	0.161054	0.204305
6	rs7763643	0	29626933	A	G	861	rs7763643_A	12243.5	12245.5	0.961524	0.576838	0.959176	0.912091	0.88048	0.992733	0.772589	0.833831
6	rs17351888	0	29627152	G	A	862	rs17351888_G	12248.3	12250.2	0.745061	0.787438	0.53406	0.688465	0.232928	0.311405	0.731194	0.35322
6	rs453658	0	29627827	G	A	863	rs453658_G	12248.3	12241.8	0.00343881	4.18348e-06	0.0171552	0.000716924	0.06057	0.0594552	0.00216599	0.00858603
6	rs6915177	0	29630567	A	G	864	rs6915177_A	12248.3	12249.3	0.3116	0.509092	0.273067	0.166841	0.339768	0.425738	0.266751	0.282524
6	rs7757931	0	29631649	A	C	865	rs7757931_A	12241.8	12242.5	0.240515	0.412652	0.210646	0.131853	0.267949	0.347163	0.213594	0.231293
6	rs8337	0	29631655	C	G	866	rs8337_C	12247.6	12248.1	0.220964	0.290164	0.0375642	0.564455	0.256343	0.754743	0.299699	0.580938
6	rs2076487	0	29631838	C	G	867	rs2076487_C	12248.3	12249.5	0.358178	0.561647	0.314072	0.199806	0.381779	0.476717	0.313693	0.332918
6	rs2076485	0	29631931	G	A	868	rs2076485_G	12248.3	12247.6	0.0988242	0.0127625	0.258312	0.0745542	0.50522	0.473009	0.069866	0.186308
6	rs404240	0	29631936	G	A	869	rs404240_G	12248.3	12241.4	0.00289385	2.64492e-10	0.221064	2.5759e-06	0.0248341	0.000644273	0.000184156	0.00119513
6	rs2534790	0	29632147	A	C	870	rs2534790_A	12207.3	12206.6	0.0988609	0.0125456	0.254893	0.0731941	0.498855	0.468018	0.0671229	0.18094
6	rs362536	0	29634919	A	G	871	rs362536_A	12248.3	12243.6	0.00929082	1.11767e-05	0.0400767	0.00282162	0.1182	0.102991	0.00607077	0.0207714
6	rs64036	0	29635246	A	C	872	rs64036_A	12247.2	12247.9	0.255235	0.354637	0.219867	0.122797	0.3145	0.378058	0.18858	0.211849
6	rs1233406	0	29635560	C	A	873	rs1233406_C	12248.3	12249.6	0.380652	0.514271	0.21651	0.353216	0.240266	0.292568	0.302307	0.290606
6	rs362535	0	29635600	G	A	874	rs362535_G	12248.3	12249.9	0.525591	0.750181	0.524798	0.517907	0.570642	0.531881	0.556225	0.733126
6	rs362513	0	29636297	G	A	875	rs362513_G	12248.3	12243.9	0.0111748	3.47577e-05	0.0327539	0.00340059	0.0764521	0.0925756	0.00600718	0.0256678
6	rs362533	0	29636876	C	G	876	rs362533_C	12248.3	12249.9	0.496143	0.66516	0.5632	0.468168	0.779151	0.449473	0.19012	0.278776
6	rs995185	0	29637116	A	T	877	rs995185_A	12245.1	12245.1	0.151974	0.0077794	0.18284	0.0812987	0.205582	0.194002	0.146877	0.145674
6	rs1233405	0	29637733	A	G	878	rs1233405_A	12248.3	12242	0.00388265	4.49698e-06	0.0182037	0.000733504	0.0664367	0.0631557	0.00226839	0.00888486
6	rs362532	0	29638392	G	A	879	rs362532_G	12248.3	12244.7	0.0181355	0.0910241	0.0139441	0.00666971	0.0158835	0.0180353	0.00953701	0.0108988
6	rs362531	0	29638434	A	G	880	rs362531_A	12248.3	12243.7	0.0103013	0.0641396	0.00703888	0.00325081	0.00821056	0.0101081	0.00464542	0.00521768
6	rs362512	0	29638607	A	G	881	rs362512_A	12244.2	12239.2	0.00812794	8.0203e-06	0.03694	0.00248347	0.111748	0.0952966	0.00503515	0.017585
6	rs362511	0	29638829	G	A	882	rs362511_G	12246.6	12241.6	0.00789292	0.00331132	0.00973228	0.00266321	0.0137247	0.0130673	0.00265482	0.0077987
6	rs362529	0	29638847	A	G	883	rs362529_A	12248.3	12249.1	0.270994	0.011399	0.380727	0.20733	0.544215	0.545836	0.450415	0.461652
6	rs362527	0	29639797	G	A	884	rs362527_G	12247.7	12248.4	0.254174	0.0244602	0.156199	0.149724	0.151283	0.195884	0.0916093	0.140646
6	rs2523447	0	29640718	A	G	885	rs2523447_A	12248.3	12247.8	0.110895	0.016172	0.219018	0.110602	0.198637	0.235193	0.11447	0.174905
6	rs388234	0	29641274	G	A	886	rs388234_G	12248.3	12246	0.0369522	0.000914602	0.0310579	0.0123026	0.0558601	0.0413109	0.0186768	0.0555124
6	rs3094577	0	29641849	A	G	887	rs3094577_A	12248.3	12249.6	0.403444	0.774906	0.063715	0.714331	0.577632	0.85059	0.353321	0.536258
6	rs12525160	0	29643196	A	G	888	rs12525160_A	12248.3	12249.6	0.392139	0.0776097	0.288229	0.297309	0.35409	0.364682	0.456697	0.861855
6	rs1235162	0	29645203	G	A	889	rs1235162_G	12247.8	12242.8	0.008124	9.59346e-10	0.399454	9.64549e-06	0.0633059	0.00228717	0.000597999	0.00362072
6	rs1233400	0	29645954	A	G	890	rs1233400_A	12248.3	12249	0.246483	0.259116	0.370055	0.176478	0.496192	0.323739	0.188691	0.141871
6	rs1003582	0	29646382	C	G	891	rs1003582_C	12248.3	12246	0.0375299	0.000274847	0.043861	0.0107966	0.151747	0.143664	0.00810082	0.0433753
6	rs1233399	0	29647461	A	G	892	rs1233399_A	12248.3	12247.2	0.075603	0.0247372	0.137615	0.043586	0.18337	0.123858	0.0412081	0.037987
6	rs3025651	0	29647893	C	A	893	rs3025651_C	12248.3	12249.6	0.408454	0.973104	0.571148	0.307741	0.958407	0.597494	0.161884	0.169804
6	rs1003581	0	29648183	A	G	894	rs1003581_A	12205.2	12207.2	0.823933	0.194049	0.530343	0.599841	0.664541	0.703092	0.766268	0.764744
6	rs982558	0	29648501	A	G	895	rs982558_A	12248.3	12250.3	0.82554	0.454294	0.986592	0.765731	0.650194	0.556156	0.512093	0.732816
6	rs3025650	0	29650926	G	A	896	rs3025650_G	12247.9	12249.3	0.439188	0.967917	0.59723	0.331431	0.943915	0.624231	0.174875	0.171758
6	rs362525	0	29651625	C	A	897	rs362525_C	12248.3	12249.8	0.464808	0.0922737	0.355877	0.365113	0.420552	0.439472	0.530211	0.945077
6	rs12528017	0	29652530	C	A	898	rs12528017_C	12248.3	12250.2	0.777523	0.734556	0.923113	0.795453	0.525795	0.947755	0.749442	0.991199
6	rs3117073	0	29652804	G	A	899	rs3117073_G	12248.3	12250.3	0.925991	0.544515	0.299308	0.540323	0.914273	0.469951	0.989975	0.522024
6	rs362522	0	29653187	A	G	900	rs362522_A	12248.3	12250.2	0.759369	0.203779	0.864886	0.741171	0.95055	0.621684	0.759865	0.871805
6	rs1233397	0	29653694	G	A	901	rs1233397_G	12248.3	12250	0.565034	0.31552	0.511202	0.231909	0.911914	0.435745	0.214931	0.250577
6	rs1233396	0	29654778	A	G	902	rs1233396_A	12247.1	12244	0.0232493	2.68741e-08	0.62715	0.000194147	0.114053	0.00547744	0.0041342	0.0192876
6	rs926552	0	29656068	A	G	903	rs926552_A	12248.3	12245.1	0.0217224	2.20655e-08	0.612026	0.000172264	0.109154	0.00508635	0.00379631	0.0180193
6	rs6936331	0	29656754	A	G	904	rs6936331_A	12248.3	12248.8	0.222051	0.195484	0.162013	0.208069	0.180967	0.315879	0.206211	0.616887
6	rs1233394	0	29657240	A	C	905	rs1233394_A	12248.3	12249.1	0.275108	0.293871	0.225652	0.159143	0.248751	0.28373	0.121104	0.0984593
6	rs12530421	0	29657422	C	A	906	rs12530421_C	12248.3	12250.2	0.76602	0.66067	0.908283	0.728803	0.632045	0.836552	0.662216	0.922031
6	rs1233391	0	29658597	G	A	907	rs1233391_G	12247.9	12249.6	0.55898	0.316519	0.34237	0.205711	0.593355	0.379594	0.151937	0.193066
6	rs1233390	0	29659840	A	G	908	rs1233390_A	12248.3	12249.4	0.331697	0.364136	0.27406	0.194399	0.299538	0.346801	0.152384	0.126652
6	rs1233389	0	29660462	A	C	909	rs1233389_A	12226.7	12228.1	0.445199	0.490421	0.371814	0.277638	0.405536	0.462786	0.222183	0.188786
6	rs1233388	0	29661706	G	A	910	rs1233388_G	12248.3	12250.1	0.628915	0.347451	0.375283	0.241675	0.631209	0.420317	0.170156	0.215274
6	rs362521	0	29664738	A	G	911	rs362521_A	12248.3	12250.3	0.886052	0.700724	0.96973	0.706511	0.542209	0.892337	0.709836	0.947299
6	rs1233386	0	29666169	A	G	912	rs1233386_A	12248.3	12249.5	0.352501	0.359054	0.304535	0.211495	0.321965	0.360998	0.168294	0.135432
6	rs362520	0	29666343	G	A	913	rs362520_G	12248.3	12249.3	0.313374	0.869975	0.377879	0.30789	0.59517	0.293483	0.105071	0.176509
6	rs1233384	0	29667274	A	G	914	rs1233384_A	12248.3	12249.5	0.352501	0.359054	0.304535	0.211495	0.321965	0.360998	0.168294	0.135432
6	rs6912589	0	29669829	A	G	915	rs6912589_A	12248.3	12250.2	0.788369	0.644701	0.980162	0.754055	0.410931	0.595299	0.6924	0.805071
6	rs17508548	0	29671046	C	A	916	rs17508548_C	12212.4	12214.4	0.834436	0.65226	0.991386	0.945211	0.824887	0.768001	0.817411	0.663322
6	rs9468559	0	29673266	C	A	917	rs9468559_C	12248.3	12249.5	0.365975	0.401068	0.471256	0.387788	0.710747	0.447598	0.211609	0.2536
6	rs3095273	0	29674348	A	G	918	rs3095273_A	12232.5	12234.5	0.864052	0.502705	0.247939	0.514005	0.697064	0.471372	0.953981	0.55662
6	rs3025646	0	29674821	G	A	919	rs3025646_G	12248.3	12250.2	0.752837	0.588856	0.86405	0.743661	0.688941	0.792365	0.620895	0.868908
6	rs362518	0	29675617	G	A	920	rs362518_G	12248.3	12250.2	0.786672	0.708327	0.94057	0.999271	0.773206	0.811918	0.865586	0.608008
6	rs362517	0	29677024	A	G	921	rs362517_A	12248.3	12250.3	0.84474	0.817131	0.966415	0.90937	0.805834	0.76179	0.972159	0.527203
6	rs3025643	0	29677934	A	G	922	rs3025643_A	12247.8	12249.8	0.945878	0.49912	0.21148	0.544607	0.676364	0.491578	0.922295	0.582101
6	rs3025642	0	29678295	A	G	923	rs3025642_A	12242.7	12244.4	0.594572	0.574508	0.756762	0.840084	0.563668	0.514258	0.768281	0.757717
6	rs3025640	0	29678644	A	G	924	rs3025640_A	12248.3	12248.7	0.200355	0.0148746	0.139472	0.128516	0.131949	0.1711	0.0841711	0.133925
6	rs2267633	0	29678820	G	A	925	rs2267633_G	12245.3	12247.2	0.784193	0.709202	0.938697	0.9999	0.771948	0.81106	0.866975	0.609802
6	rs10946999	0	29679588	A	C	926	rs10946999_A	12248.3	12250.3	0.81037	0.876889	0.677209	0.944551	0.425807	0.399089	0.887311	0.937252
6	rs740884	0	29682610	A	G	927	rs740884_A	12234.8	12234.8	0.154917	0.0118554	0.0972702	0.0863464	0.0916801	0.12667	0.0566947	0.0986504
6	rs29261	0	29684177	G	A	928	rs29261_G	12248.3	12248.1	0.138376	0.0292947	0.225878	0.186115	0.133565	0.146386	0.145445	0.391549
6	rs29230	0	29684372	G	A	929	rs29230_G	12248.3	12249.6	0.401518	0.0522689	0.345817	0.252684	0.422598	0.232193	0.176574	0.521912
6	rs29262	0	29684571	G	A	930	rs29262_G	12248.3	12248.2	0.14137	0.0303344	0.22925	0.189976	0.135941	0.149207	0.148296	0.397077
6	rs29258	0	29685596	A	G	931	rs29258_A	12247.8	12247.7	0.138811	0.0294424	0.226426	0.186669	0.134006	0.146918	0.145911	0.392348
6	rs29257	0	29686009	G	A	932	rs29257_G	12248.3	12248.2	0.14137	0.0303344	0.22925	0.189976	0.135941	0.149207	0.148296	0.397077
6	rs29255	0	29687523	C	A	933	rs29255_C	12248.3	12250.2	0.774526	0.743965	0.916764	0.802541	0.523196	0.946287	0.755812	0.998164
6	rs29253	0	29688415	G	A	934	rs29253_G	12247.8	12247.9	0.159066	0.0355494	0.253804	0.208237	0.154432	0.169241	0.164322	0.433958
6	rs29227	0	29688567	A	C	935	rs29227_A	12244.4	12244.2	0.139172	0.0297079	0.226457	0.187224	0.133818	0.146899	0.146335	0.393603
6	rs29226	0	29688990	C	A	936	rs29226_C	12245.3	12245.4	0.171811	0.0392724	0.270504	0.224551	0.165733	0.181908	0.17757	0.459801
6	rs2267634	0	29690191	C	G	937	rs2267634_C	12248.3	12250.1	0.618561	0.867079	0.702358	0.915788	0.80453	0.843879	0.867668	0.951239
6	rs3025632	0	29690279	A	G	938	rs3025632_A	12248.3	12246.8	0.0609142	0.00474421	0.0794899	0.04644	0.0643667	0.0866159	0.0351547	0.0590264
6	rs16867690	0	29693362	A	G	939	rs16867690_A	12245.2	12245	0.13607	0.0286773	0.222356	0.183213	0.131471	0.144149	0.142952	0.385303
6	rs6919973	0	29695853	A	G	940	rs6919973_A	12248.3	12248.4	0.169039	0.0384994	0.267575	0.219273	0.164691	0.179981	0.175559	0.453534
6	rs29223	0	29696523	C	A	941	rs29223_C	12247.8	12247.7	0.145166	0.0310248	0.236251	0.193477	0.141215	0.154215	0.153718	0.406001
6	rs29221	0	29697103	C	G	942	rs29221_C	12245.4	12247.2	0.61007	0.140654	0.741755	0.595815	0.947594	0.718079	0.648485	0.998583
6	rs29220	0	29697645	G	C	943	rs29220_G	12247.7	12249.7	0.853158	0.284041	0.943612	0.913314	0.950731	0.554685	0.963048	0.588112
6	rs3828923	0	29698694	A	G	944	rs3828923_A	12248.3	12249.9	0.531692	0.958508	0.605867	0.900091	0.288489	0.73011	0.901838	0.676849
6	rs6938734	0	29699038	A	G	945	rs6938734_A	12248.3	12250.2	0.788369	0.644701	0.980162	0.754055	0.410931	0.595299	0.6924	0.805071
6	rs2267635	0	29700410	G	A	946	rs2267635_G	12248.3	12250.2	0.734634	0.777051	0.883444	0.834009	0.498809	0.977184	0.783838	0.973579
6	rs715044	0	29701767	A	C	947	rs715044_A	12231.9	12233.8	0.728019	0.783513	0.869752	0.846259	0.487324	0.997506	0.79673	0.959485
6	rs2021749	0	29706098	A	G	948	rs2021749_A	12248.3	12248.6	0.18561	0.0457197	0.296049	0.245987	0.185192	0.199039	0.199854	0.498703
6	rs29243	0	29707081	A	G	949	rs29243_A	12248.3	12250	0.581546	0.277708	0.808572	0.315955	0.672991	0.846604	0.564583	0.27989
6	rs29218	0	29715408	G	A	950	rs29218_G	12247.8	12243.9	0.0145748	6.67303e-06	0.365896	0.000849941	0.0323396	0.00526059	0.014843	0.0262956
6	rs29240	0	29715455	G	A	951	rs29240_G	12248.3	12242.9	0.00628185	0.000307957	0.00495237	0.012955	0.0010468	0.00370932	0.00881025	0.00755416
6	rs3025623	0	29715726	A	G	952	rs3025623_A	12248.3	12242.9	0.00628185	0.000307957	0.00495237	0.012955	0.0010468	0.00370932	0.00881025	0.00755416
6	rs1233374	0	29716673	G	A	953	rs1233374_G	12238.7	12237.6	0.0778205	0.0161449	0.173821	0.127575	0.0791869	0.0961201	0.0874277	0.308907
6	rs29273	0	29718968	C	G	954	rs29273_C	12248.3	12250	0.563154	0.805731	0.612653	0.848243	0.473561	0.301943	0.600421	0.573568
6	rs29233	0	29719208	C	G	955	rs29233_C	12248.3	12249.4	0.330377	0.28392	0.583678	0.602532	0.408873	0.385837	0.518464	0.960822
6	rs29232	0	29719410	A	G	956	rs29232_A	12248.3	12249.7	0.432557	0.0389297	0.223611	0.144728	0.415145	0.506403	0.100405	0.191803
6	rs3131854	0	29719864	A	G	957	rs3131854_A	12248.3	12250.3	0.93958	0.693967	0.460119	0.967964	0.456473	0.560403	0.665544	0.534368
6	rs16895214	0	29723772	C	A	958	rs16895214_C	12248.3	12250.2	0.788191	0.262456	0.92025	0.448095	0.380192	0.530537	0.764523	0.417615
6	rs3129073	0	29723801	G	A	959	rs3129073_G	12247.8	12245.7	0.0418973	2.99025e-05	0.563313	0.00259245	0.0734121	0.0156247	0.0296902	0.0499912
6	rs439812	0	29724586	G	A	960	rs439812_G	12208.9	12210.9	0.906455	0.547137	0.623247	0.590533	0.612281	0.62878	0.633233	0.335078
6	rs29270	0	29725379	G	A	961	rs29270_G	12247.8	12248.4	0.228524	0.0308073	0.266718	0.15611	0.209289	0.334711	0.17709	0.240911
6	rs29269	0	29725726	A	G	962	rs29269_A	12248.3	12250	0.562851	0.80024	0.609696	0.850472	0.470967	0.301596	0.600622	0.57376
6	rs6920297	0	29726011	A	G	963	rs6920297_A	12248.3	12249.5	0.355125	0.557842	0.244868	0.131558	0.310416	0.376648	0.13906	0.113588
6	rs29272	0	29726345	A	C	964	rs29272_A	12248.3	12247.7	0.103477	0.0147984	0.071261	0.157493	0.03064	0.0828844	0.118483	0.0864157
6	rs29231	0	29726504	A	G	965	rs29231_A	12248.3	12249.7	0.42921	0.942853	0.512797	0.737713	0.35998	0.214747	0.517828	0.487332
6	rs29254	0	29731573	G	A	966	rs29254_G	12248.3	12249.5	0.361184	0.316375	0.629534	0.645157	0.45127	0.42826	0.558555	0.907049
6	rs29234	0	29732091	C	A	967	rs29234_C	12248.3	12247.8	0.110143	0.0204008	0.0786713	0.179599	0.0317759	0.0884961	0.1398	0.100007
6	rs3130250	0	29732980	A	G	968	rs3130250_A	12247.3	12249.1	0.601988	0.436493	0.0695845	0.574528	0.026415	0.453429	0.199152	0.163071
6	rs2252711	0	29734300	G	A	969	rs2252711_G	12247.7	12249.7	0.966118	0.483052	0.7273	0.489073	0.527491	0.529681	0.527075	0.268201
6	rs9257932	0	29734355	G	A	970	rs9257932_G	12248.3	12250	0.543294	0.626041	0.413582	0.430045	0.162412	0.121424	0.402005	0.285555
6	rs3135050	0	29736416	A	G	971	rs3135050_A	12248.3	12250.3	0.923159	0.691722	0.156625	0.880956	0.0744512	0.747752	0.382962	0.303249
6	rs2535260	0	29736862	C	G	972	rs2535260_C	12243.8	12243.9	0.165624	0.55844	0.284292	0.345898	0.357456	0.192312	0.215878	0.229556
6	rs3117286	0	29737753	G	A	973	rs3117286_G	12248.3	12249.8	0.48936	0.526867	0.694153	0.383677	0.71225	0.955936	0.304987	0.543826
6	rs2535255	0	29739669	A	G	974	rs2535255_A	12238	12239.3	0.379472	0.316544	0.275907	0.471048	0.0398058	0.0917608	0.624245	0.414011
6	rs3130252	0	29739723	G	A	975	rs3130252_G	12248.3	12250.3	0.888611	0.661239	0.14274	0.844892	0.0668516	0.708723	0.357944	0.282943
6	rs2256266	0	29740297	A	G	976	rs2256266_A	12248.3	12250.3	0.986308	0.536276	0.695025	0.51818	0.553895	0.562492	0.552905	0.286136
6	rs6905408	0	29741754	A	G	977	rs6905408_A	12248.3	12249.5	0.3653	0.287767	0.139946	0.218556	0.0557105	0.0403957	0.16335	0.131731
6	rs2857766	0	29741982	G	C	978	rs2857766_G	12184.7	12185.2	0.214486	0.522064	0.108241	0.55155	0.51928	0.507346	0.523465	0.861798
6	rs3130253	0	29741991	A	G	979	rs3130253_A	12248.3	12250.3	0.954246	0.613117	0.137669	0.862561	0.0875277	0.894489	0.343696	0.531456
6	rs2857767	0	29742247	C	G	980	rs2857767_C	12218.9	12220.5	0.524139	0.556612	0.734272	0.41167	0.665235	0.997451	0.328971	0.580872
6	rs2857770	0	29742695	A	G	981	rs2857770_A	12229.7	12231.1	0.457194	0.489619	0.652189	0.35771	0.752958	0.915334	0.280598	0.507619
6	rs17184514	0	29743389	C	A	982	rs17184514_C	12248.3	12250.1	0.651422	0.797995	0.451968	0.565796	0.686355	0.838981	0.383288	0.765084
6	rs926827	0	29743496	A	G	983	rs926827_A	12248.3	12249.9	0.516576	0.410376	0.385204	0.631494	0.060724	0.128556	0.790405	0.55523
6	rs2071653	0	29743907	A	G	984	rs2071653_A	12248.3	12250.2	0.784362	0.882941	0.558731	0.800895	0.599787	0.406518	0.828361	0.66914
6	rs9257936	0	29747755	A	G	985	rs9257936_A	12248.3	12250.2	0.766903	0.884657	0.911155	0.981104	0.902963	0.911115	0.917269	0.99177
6	rs2535241	0	29748764	A	T	986	rs2535241_A	12245.5	12247.1	0.519837	0.413171	0.387587	0.636032	0.0610299	0.129066	0.79425	0.558897
6	rs2747419	0	29750173	A	C	987	rs2747419_A	12248.3	12249.7	0.428255	0.359047	0.310797	0.525203	0.0479358	0.107239	0.684567	0.463699
6	rs375984	0	29752481	A	G	988	rs375984_A	12248.3	12249.5	0.378469	0.00590253	0.673893	0.0569474	0.601387	0.206924	0.190974	0.327576
6	rs2535238	0	29753017	A	C	989	rs2535238_A	12248.3	12249.6	0.396413	0.00644277	0.651019	0.0612003	0.622405	0.217774	0.201347	0.342872
6	rs2747421	0	29753097	G	C	990	rs2747421_G	12248.3	12249.5	0.365489	0.00544438	0.6992	0.0525213	0.579674	0.193871	0.178802	0.30919
6	rs387603	0	29753557	A	C	991	rs387603_A	12248.3	12249.7	0.428255	0.359047	0.310797	0.525203	0.0479358	0.107239	0.684567	0.463699
6	rs396660	0	29754144	A	G	992	rs396660_A	12248.3	12249.8	0.484397	0.55834	0.114977	0.616882	0.426954	0.927448	0.858987	0.981511
6	rs445150	0	29754858	G	A	993	rs445150_G	12248.3	12249.8	0.484397	0.55834	0.114977	0.616882	0.426954	0.927448	0.858987	0.981511
6	rs3870968	0	29755128	A	C	994	rs3870968_A	12248.3	12249.4	0.332517	0.286189	0.594826	0.603349	0.416129	0.394102	0.519214	0.952895
6	rs3129054	0	29757035	A	G	995	rs3129054_A	12246.9	12248.9	0.963999	0.136222	0.987484	0.80334	0.959289	0.630899	0.818106	0.760204
6	rs9500954	0	29757154	G	A	996	rs9500954_G	12248.3	12244.5	0.0158851	0.0131017	0.0270736	0.0128404	0.0235282	0.013425	0.0153321	0.0303686
6	rs3129051	0	29758101	A	T	997	rs3129051_A	12248.3	12249.7	0.440979	0.380083	0.322405	0.54429	0.0507232	0.112893	0.707251	0.481964
6	rs423281	0	29759511	A	G	998	rs423281_A	12248.3	12249.7	0.439181	0.372215	0.321151	0.537227	0.0516898	0.114794	0.699601	0.476271
6	rs385743	0	29759642	A	G	999	rs385743_A	12248.3	12249.5	0.377682	0.315989	0.27092	0.466454	0.0381956	0.0884266	0.617946	0.407723
6	rs2535236	0	29759664	A	G	1000	rs2535236_A	12234.8	12236.8	0.834437	0.105713	0.874368	0.680083	0.894884	0.754977	0.690751	0.88388
6	rs2747437	0	29760135	A	C	1001	rs2747437_A	12248.3	12249.7	0.428255	0.359047	0.310797	0.525203	0.0479358	0.107239	0.684567	0.463699
6	rs3117292	0	29760178	G	A	1002	rs3117292_G	12248.3	12250	0.581039	0.0279796	0.719609	0.521433	0.586057	0.986183	0.607888	0.897049
6	rs3129045	0	29760555	A	C	1003	rs3129045_A	12233.9	12235.7	0.674426	0.0634713	0.670242	0.566653	0.504449	0.902844	0.628595	0.966895
6	rs2747442	0	29761165	G	A	1004	rs2747442_G	12247.2	12249.2	0.841671	0.104605	0.885438	0.688801	0.909276	0.73698	0.704417	0.870986
6	rs2747444	0	29761271	C	A	1005	rs2747444_C	12248.3	12249.7	0.428255	0.359047	0.310797	0.525203	0.0479358	0.107239	0.684567	0.463699
6	rs3117294	0	29761308	C	A	1006	rs3117294_C	12248.3	12250.1	0.668567	0.0621868	0.662493	0.561659	0.496081	0.892551	0.621242	0.955729
6	rs3117299	0	29761936	C	A	1007	rs3117299_C	12225.4	12226.8	0.430753	0.00517813	0.696631	0.0769709	0.396672	0.168678	0.258455	0.377217
6	rs3095286	0	29761943	A	G	1008	rs3095286_A	12229.2	12231.2	0.908403	0.127198	0.959963	0.753854	0.980491	0.665483	0.777865	0.802378
6	rs3117301	0	29762679	A	G	1009	rs3117301_A	12248.3	12249.9	0.502405	0.0100872	0.585002	0.0961751	0.704422	0.313928	0.263674	0.437406
6	rs2747453	0	29762922	G	A	1010	rs2747453_G	12248.3	12248.7	0.200399	0.615494	0.279913	0.421854	0.224412	0.137052	0.290868	0.258527
6	rs2747454	0	29763092	A	G	1011	rs2747454_A	12237.6	12237.3	0.126024	0.724799	0.194241	0.335669	0.158634	0.0628046	0.233052	0.19738
6	rs2747457	0	29764396	C	A	1012	rs2747457_C	12247.8	12249.4	0.503458	0.0101205	0.583229	0.0964253	0.706795	0.315475	0.26476	0.438806
6	rs2894113	0	29769435	A	T	1013	rs2894113_A	12248.3	12250.2	0.697264	0.523398	0.561307	0.305541	0.809942	0.235169	0.541686	0.411325
6	rs3094736	0	29770353	A	T	1014	rs3094736_A	12247.2	12249.1	0.725501	0.544446	0.539151	0.321208	0.836843	0.248932	0.565328	0.432024
6	rs3129029	0	29770422	C	A	1015	rs3129029_C	12248.3	12250.3	0.960345	0.907919	0.404317	0.872623	0.322203	0.721715	0.684462	0.609108
6	rs3131888	0	29771868	G	A	1016	rs3131888_G	12247.8	12245	0.0270546	0.00128147	0.356244	0.00773457	0.064128	0.00833694	0.0182508	0.0374624
6	rs3129090	0	29772110	A	G	1017	rs3129090_A	12248.3	12248.4	0.170882	0.574362	0.239436	0.375552	0.186514	0.115378	0.252639	0.225736
6	rs3131886	0	29772431	G	A	1018	rs3131886_G	12247.8	12248.2	0.205631	0.0490347	0.990436	0.0783155	0.305834	0.0617512	0.172836	0.251128
6	rs3131875	0	29774090	A	G	1019	rs3131875_A	12247.8	12249.8	0.818778	0.623226	0.380352	0.916666	0.391149	0.799942	0.698503	0.314898
6	rs3116803	0	29775851	G	A	1020	rs3116803_G	12245	12246.9	0.733047	0.242798	0.137911	0.492667	0.631278	0.836799	0.960692	0.836478
6	rs3116802	0	29775869	G	A	1021	rs3116802_G	12248.3	12250.2	0.684757	0.273458	0.12366	0.534208	0.592826	0.889015	0.995876	0.793355
6	rs3129070	0	29776055	A	G	1022	rs3129070_A	12246.7	12248.5	0.669366	0.281548	0.119254	0.546204	0.580601	0.902049	0.981265	0.779288
6	rs9258102	0	29776892	G	A	1023	rs9258102_G	12238.8	12236.1	0.0307249	0.172681	0.064464	0.100899	0.0395042	0.017825	0.0638089	0.0620234
6	rs3116799	0	29776986	C	A	1024	rs3116799_C	12182.2	12184.2	0.83314	0.169655	0.182407	0.429811	0.991923	0.573345	0.948246	0.922133
6	rs6911622	0	29777730	A	G	1025	rs6911622_A	12248	12249.6	0.529966	0.124965	0.606089	0.417957	0.512595	0.708212	0.462496	0.565788
6	rs2107203	0	29777809	A	G	1026	rs2107203_A	12245.6	12247.5	0.6981	0.265463	0.127318	0.520722	0.601249	0.880578	0.989021	0.808224
6	rs6456993	0	29778515	A	G	1027	rs6456993_A	12232.4	12229.9	0.0336307	0.181844	0.0687515	0.106957	0.0424311	0.0191287	0.0683265	0.0667699
6	rs9258117	0	29779074	A	G	1028	rs9258117_A	12240.4	12240.2	0.136889	0.495534	0.222055	0.351957	0.152132	0.0877981	0.241539	0.208183
6	rs9258122	0	29779719	A	G	1029	rs9258122_A	12245.4	12247.2	0.672538	0.283215	0.119739	0.546949	0.581474	0.902848	0.979937	0.77894
6	rs3131865	0	29780144	G	C	1030	rs3131865_G	12248.3	12250.3	0.85094	0.122666	0.155754	0.33671	0.544999	0.877237	0.803461	0.942057
6	rs3131863	0	29781462	G	A	1031	rs3131863_G	12245.6	12247.3	0.550152	0.743454	0.730539	0.704092	0.842434	0.40277	0.959742	0.635528
6	rs11962017	0	29781979	A	G	1032	rs11962017_A	12247.7	12249.4	0.549991	0.134514	0.627877	0.437789	0.532482	0.7312	0.483583	0.59156
6	rs12663603	0	29782408	G	A	1033	rs12663603_G	12248.3	12241.6	0.00318657	6.24627e-05	0.00417223	0.00572157	0.00931838	0.0166323	0.00181927	0.00370797
6	rs1476573	0	29782627	A	G	1034	rs1476573_A	12247.7	12249.3	0.542453	0.738128	0.740796	0.695149	0.855094	0.393527	0.947685	0.644906
6	rs1476572	0	29782720	C	A	1035	rs1476572_C	12247.8	12249.5	0.547992	0.745796	0.734437	0.701057	0.84979	0.396474	0.956035	0.635542
6	rs7762253	0	29784802	A	G	1036	rs7762253_A	12248.3	12249.8	0.475937	0.392792	0.430895	0.750165	0.840605	0.807007	0.982381	0.710706
6	rs3871467	0	29785228	A	G	1037	rs3871467_A	12247.8	12249.2	0.407818	0.470099	0.338208	0.796194	0.822014	0.564935	0.984701	0.783101
6	rs1610742	0	29785931	G	A	1038	rs1610742_G	12248.3	12250.3	0.868741	0.154046	0.20362	0.397136	0.949838	0.519596	0.905176	0.967027
6	rs1610594	0	29787026	G	A	1039	rs1610594_G	12248.3	12250.1	0.641132	0.847552	0.637616	0.800818	0.738758	0.480619	0.942366	0.550537
6	rs7741807	0	29788636	C	G	1040	rs7741807_C	12248.3	12250.2	0.707551	0.737007	0.439848	0.586693	0.164942	0.198614	0.503072	0.402322
6	rs1610597	0	29789679	A	G	1041	rs1610597_A	12248.3	12250.3	0.931781	0.670021	0.23792	0.950869	0.191435	0.948413	0.48277	0.434849
6	rs1632964	0	29790218	A	G	1042	rs1632964_A	12247.7	12249.7	0.925959	0.134389	0.226269	0.358553	0.902398	0.483838	0.855646	0.981849
6	rs2524272	0	29790379	G	A	1043	rs2524272_G	12248.3	12250.1	0.641132	0.847552	0.637616	0.800818	0.738758	0.480619	0.942366	0.550537
6	rs1627567	0	29790845	A	T	1044	rs1627567_A	12248	12249.8	0.642844	0.850452	0.635726	0.802962	0.73637	0.482635	0.939778	0.548617
6	rs2735062	0	29790868	G	A	1045	rs2735062_G	12247.8	12249.3	0.480316	0.404568	0.397029	0.710979	0.917881	0.64505	0.897011	0.697811
6	rs1632962	0	29791787	A	G	1046	rs1632962_A	12248.3	12250.3	0.939303	0.12987	0.23442	0.349161	0.885645	0.471514	0.838562	0.963533
6	rs2517912	0	29791923	A	G	1047	rs2517912_A	12247.8	12249.3	0.479147	0.407392	0.395803	0.713455	0.918723	0.644688	0.89944	0.700169
6	rs2517911	0	29792613	G	A	1048	rs2517911_G	12247.8	12249.8	0.890023	0.0971926	0.338153	0.262077	0.688101	0.300817	0.610121	0.728725
6	rs7759272	0	29792973	G	A	1049	rs7759272_G	12248.3	12249.2	0.293586	0.20724	0.27406	0.336937	0.145873	0.183006	0.239454	0.435832
6	rs3757324	0	29797106	A	C	1050	rs3757324_A	12248.3	12249.2	0.295716	0.204484	0.273449	0.333465	0.143863	0.181255	0.235741	0.430323
6	rs3998799	0	29798673	G	C	1051	rs3998799_G	12225.6	12226.7	0.336745	0.943474	0.30615	0.870868	0.888274	0.677478	0.798272	0.970093
6	rs1362126	0	29798998	A	G	1052	rs1362126_A	12248.3	12249.5	0.370027	0.892534	0.334876	0.920926	0.923487	0.705176	0.839706	0.993462
6	rs1736926	0	29800541	A	G	1053	rs1736926_A	12245.1	12247.1	0.796455	0.631842	0.149734	0.708916	0.139818	0.844554	0.252686	0.242472
6	rs2076177	0	29801092	A	G	1054	rs2076177_A	12239.4	12240.3	0.289983	0.203541	0.268295	0.331089	0.143426	0.179321	0.233382	0.426817
6	rs2235383	0	29801478	G	A	1055	rs2235383_G	12248.3	12249.2	0.287766	0.204008	0.267286	0.329815	0.141616	0.177559	0.233048	0.426459
6	rs1736922	0	29801948	A	G	1056	rs1736922_A	12247.1	12249.1	0.920313	0.104938	0.321358	0.277547	0.706917	0.312803	0.631934	0.752166
6	rs3734814	0	29802659	C	A	1057	rs3734814_C	12205	12206.1	0.325955	0.206156	0.292965	0.367414	0.165723	0.211754	0.260541	0.463392
6	rs1628578	0	29803481	C	A	1058	rs1628578_C	12245.4	12247.4	0.924701	0.106467	0.317993	0.281503	0.713976	0.318005	0.638766	0.758602
6	rs9258187	0	29803579	C	A	1059	rs9258187_C	12248.3	12249.2	0.287766	0.204008	0.267286	0.329815	0.141616	0.177559	0.233048	0.426459
6	rs2272874	0	29804224	G	A	1060	rs2272874_G	12248.3	12249.2	0.287766	0.204008	0.267286	0.329815	0.141616	0.177559	0.233048	0.426459
6	rs1611350	0	29806800	G	A	1061	rs1611350_G	12248.3	12250	0.585524	0.0483095	0.613681	0.199827	0.484926	0.166566	0.392478	0.54291
6	rs3909134	0	29807232	G	A	1062	rs3909134_G	12248.3	12244.1	0.0124242	0.000108483	0.0166759	0.022197	0.0351593	0.0502307	0.00765482	0.01224
6	rs6910733	0	29807364	G	A	1063	rs6910733_G	12247.8	12247.2	0.102835	0.0516941	0.070686	0.0870194	0.0295011	0.0403635	0.0422006	0.117865
6	rs2743922	0	29807692	A	C	1064	rs2743922_A	12248.3	12248.7	0.204011	0.769793	0.183454	0.59664	0.645373	0.438394	0.520237	0.686858
6	rs2523400	0	29807763	G	A	1065	rs2523400_G	12248.3	12250	0.560716	0.0322368	0.543519	0.187553	0.102267	0.23043	0.126554	0.162119
6	rs2523399	0	29808058	G	A	1066	rs2523399_G	12248.3	12250	0.555324	0.0315852	0.537861	0.184476	0.100719	0.227249	0.124237	0.159522
6	rs1610601	0	29808162	A	C	1067	rs1610601_A	12248.3	12248.9	0.225083	0.00172286	0.995993	0.0323318	0.187942	0.0563621	0.101575	0.165189
6	rs2735054	0	29808594	G	A	1068	rs2735054_G	12242.9	12244.6	0.565306	0.0325645	0.546346	0.189679	0.103537	0.233309	0.127645	0.163257
6	rs2735052	0	29809543	A	G	1069	rs2735052_A	12248.3	12250.1	0.6131	0.397388	0.549677	0.868912	0.858717	0.85954	0.870928	0.721353
6	rs7755571	0	29809922	G	A	1070	rs7755571_G	12248.3	12247.8	0.11109	0.0562989	0.0760337	0.0940772	0.0320828	0.0440038	0.0458819	0.126409
6	rs1610602	0	29810040	A	C	1071	rs1610602_A	12247.1	12249	0.708792	0.0545265	0.502917	0.270084	0.595254	0.247552	0.516252	0.622563
6	rs2844833	0	29810185	C	G	1072	rs2844833_C	12248.3	12248.7	0.196293	0.65392	0.292158	0.40069	0.20324	0.121456	0.287807	0.238608
6	rs2523395	0	29810489	A	G	1073	rs2523395_A	12248.3	12250.1	0.604721	0.404237	0.54297	0.8781	0.864391	0.853821	0.878299	0.730626
6	rs2394159	0	29810658	G	A	1074	rs2394159_G	12248.3	12248.8	0.218219	0.795804	0.195875	0.62221	0.670471	0.458803	0.542584	0.712633
6	rs2394160	0	29811241	G	A	1075	rs2394160_G	12248.3	12250.1	0.634002	0.384618	0.568594	0.846168	0.835314	0.883667	0.848202	0.701473
6	rs1736915	0	29812295	A	G	1076	rs1736915_A	12248.3	12250.2	0.705502	0.053089	0.502718	0.268738	0.596947	0.247887	0.514547	0.620492
6	rs1736913	0	29812379	A	G	1077	rs1736913_A	12247.9	12247.6	0.12703	0.0796821	0.56941	0.108609	0.355505	0.0674644	0.233653	0.437689
6	rs9258208	0	29812524	A	G	1078	rs9258208_A	12247.8	12247.5	0.121851	0.0634986	0.084031	0.101153	0.0364031	0.0496378	0.0502806	0.138335
6	rs7751815	0	29813063	A	G	1079	rs7751815_A	12247.8	12247.2	0.102835	0.0516941	0.070686	0.0870194	0.0295011	0.0403635	0.0422006	0.117865
6	rs2523393	0	29813638	G	A	1080	rs2523393_G	12245.3	12247	0.620109	0.394814	0.555306	0.862806	0.853036	0.865187	0.867318	0.720392
6	rs2735051	0	29813667	A	G	1081	rs2735051_A	12247.7	12248.2	0.218784	0.797428	0.196397	0.623641	0.671389	0.459661	0.544485	0.714609
6	rs1736911	0	29813751	A	G	1082	rs1736911_A	12248.3	12249.9	0.516638	0.330316	0.0470416	0.464684	0.0219331	0.396378	0.149739	0.115917
6	rs9258213	0	29814670	G	A	1083	rs9258213_G	12247.6	12247.3	0.136715	0.135847	0.0598923	0.0528852	0.0278446	0.0454216	0.0358808	0.0272073
6	rs929160	0	29814772	T	A	1084	rs929160_T	12242	12243.8	0.694771	0.0520714	0.510536	0.265159	0.592269	0.24683	0.510167	0.614687
6	rs1633096	0	29815246	A	C	1085	rs1633096_A	12210.7	12211.6	0.288459	0.00442329	0.919769	0.0627427	0.207487	0.0648551	0.129871	0.162377
6	rs2523388	0	29815683	A	G	1086	rs2523388_A	12247.8	12249.6	0.633487	0.382402	0.56801	0.84571	0.836863	0.881847	0.848548	0.702134
6	rs9258218	0	29816007	A	G	1087	rs9258218_A	12246.8	12246.3	0.113965	0.0583955	0.0777695	0.0966657	0.0331246	0.0454908	0.0469835	0.126965
6	rs1610603	0	29816201	A	G	1088	rs1610603_A	12247.2	12249	0.706006	0.519195	0.113633	0.611694	0.121684	0.788134	0.20484	0.200121
6	rs2743951	0	29817213	A	G	1089	rs2743951_A	12248.3	12250	0.592618	0.390853	0.505438	0.912448	0.891962	0.8342	0.92012	0.764889
6	rs2517938	0	29817819	G	A	1090	rs2517938_G	12244.4	12245	0.231367	0.556225	0.411498	0.393247	0.414299	0.245457	0.348151	0.230657
6	rs730858	0	29818607	A	G	1091	rs730858_A	12228.7	12227.8	0.0884161	0.35202	0.154505	0.197463	0.0989449	0.0486372	0.126809	0.112622
6	rs4713240	0	29818705	G	A	1092	rs4713240_G	12233.3	12235.3	0.992064	0.643892	0.755825	0.625598	0.388054	0.437532	0.578758	0.380295
6	rs1610613	0	29818942	A	G	1093	rs1610613_A	12247.7	12249.6	0.716323	0.528398	0.116716	0.621824	0.125385	0.80064	0.209791	0.205452
6	rs9258220	0	29819020	A	G	1094	rs9258220_A	12248.3	12248.2	0.146566	0.145557	0.0644513	0.0577209	0.0304084	0.0496375	0.0394248	0.0301235
6	rs2523386	0	29819726	A	G	1095	rs2523386_A	12246.9	12247.5	0.230984	0.704487	0.301708	0.415737	0.231882	0.146093	0.287469	0.242486
6	rs2844846	0	29820015	A	T	1096	rs2844846_A	12241.8	12242.2	0.207311	0.772185	0.185015	0.600197	0.652592	0.444151	0.524056	0.690376
6	rs9258224	0	29820235	A	G	1097	rs9258224_A	12248.3	12248.5	0.181055	0.148328	0.182418	0.233202	0.0614781	0.0626589	0.150804	0.359569
6	rs2844845	0	29820738	A	T	1098	rs2844845_A	12248.3	12248.3	0.153096	0.56511	0.235678	0.331458	0.158027	0.0925746	0.231535	0.189203
6	rs2072894	0	29821015	A	G	1099	rs2072894_A	12247.8	12248.6	0.272619	0.143341	0.175261	0.278179	0.0672938	0.0724185	0.148316	0.351592
6	rs1737087	0	29821747	A	G	1100	rs1737087_A	12209.8	12211.5	0.632112	0.439668	0.0914262	0.542773	0.0987087	0.713974	0.171244	0.167487
6	rs1737086	0	29822392	A	C	1101	rs1737086_A	12198.7	12198.7	0.155331	0.0224612	0.75311	0.087406	0.111634	0.0138507	0.134337	0.163115
6	rs6901686	0	29823700	A	G	1102	rs6901686_A	12195.9	12196.6	0.249105	0.130403	0.159592	0.261869	0.0657504	0.0728311	0.137335	0.322465
6	rs1633086	0	29823741	A	G	1103	rs1633086_A	12248.3	12248.7	0.200041	0.0360445	0.867479	0.123382	0.148877	0.0211092	0.181677	0.218378
6	rs1633085	0	29823976	A	G	1104	rs1633085_A	12248.3	12250.3	0.860371	0.993128	0.159073	0.886647	0.745204	0.552823	0.694402	0.901113
6	rs1737084	0	29825318	A	T	1105	rs1737084_A	12247.8	12249.7	0.731096	0.53942	0.119048	0.630865	0.129966	0.80955	0.21423	0.209281
6	rs733841	0	29825959	A	G	1106	rs733841_A	12237.1	12239	0.749595	0.569482	0.124027	0.65071	0.133019	0.821967	0.22222	0.216966
6	rs1610735	0	29826498	C	A	1107	rs1610735_C	12194.3	12196.2	0.768736	0.223276	0.208571	0.759326	0.991919	0.527369	0.909332	0.794289
6	rs4713243	0	29828940	G	C	1108	rs4713243_G	12248.3	12248.3	0.15553	0.0124667	0.206669	0.0781044	0.0108769	0.0177091	0.0295836	0.0362208
6	rs2394164	0	29829376	G	C	1109	rs2394164_G	12246.8	12247.7	0.307027	0.0579285	0.509725	0.156376	0.0816479	0.108934	0.106342	0.0591751
6	rs9258253	0	29829511	C	A	1110	rs9258253_C	12248.3	12250.3	0.948214	0.906401	0.637771	0.794908	0.261685	0.313743	0.694672	0.542273
6	rs9391630	0	29830494	G	A	1111	rs9391630_G	12248.3	12250.3	0.852041	0.435043	0.744221	0.454884	0.472106	0.487029	0.490912	0.238377
6	rs9258260	0	29831140	A	G	1112	rs9258260_A	12248.3	12249.7	0.430735	0.214545	0.285182	0.443099	0.120177	0.139311	0.254977	0.529343
6	rs1633070	0	29832126	A	G	1113	rs1633070_A	12248.3	12250.2	0.756408	0.567978	0.129264	0.660848	0.139529	0.844767	0.229602	0.223968
6	rs1737079	0	29832724	G	A	1114	rs1737079_G	12248.3	12250.2	0.764852	0.581992	0.130716	0.667643	0.141573	0.850566	0.233316	0.22777
6	rs1737078	0	29832918	A	C	1115	rs1737078_A	12237.6	12237.9	0.187906	0.0260158	0.848639	0.116698	0.13634	0.0194477	0.174134	0.204555
6	rs1737076	0	29833300	G	A	1116	rs1737076_G	12247.5	12248	0.227542	0.037227	0.927447	0.145565	0.164874	0.0259735	0.211309	0.245894
6	rs9258266	0	29833431	A	G	1117	rs9258266_A	12248.3	12250.3	0.863589	0.656294	0.397552	0.70981	0.198317	0.262095	0.422895	0.359014
6	rs1633063	0	29834025	A	G	1118	rs1633063_A	12244.2	12245.1	0.294802	0.00299828	0.877209	0.0462765	0.235341	0.0800098	0.139919	0.219113
6	rs6935107	0	29834148	A	G	1119	rs6935107_A	12247.4	12244.4	0.0250717	0.00707148	0.0479082	0.00810723	0.0444888	0.0828822	0.00855586	0.0130513
6	rs1633059	0	29834529	G	A	1120	rs1633059_G	12245.2	12246.8	0.535064	0.146765	0.790528	0.279262	0.364224	0.0848201	0.412854	0.273989
6	rs1610628	0	29836188	C	A	1121	rs1610628_C	12248.3	12250.2	0.756444	0.57563	0.128188	0.659652	0.138122	0.840811	0.228659	0.223311
6	rs9500976	0	29838369	G	A	1122	rs9500976_G	12248.3	12249.2	0.300268	0.0268999	0.253114	0.187565	0.190572	0.242121	0.124752	0.197839
6	rs9258275	0	29838483	G	A	1123	rs9258275_G	12248.3	12248.3	0.160239	0.0121907	0.212113	0.0805271	0.0111692	0.0178715	0.0299335	0.0368255
6	rs1737070	0	29838525	C	A	1124	rs1737070_C	12248.3	12250.2	0.750933	0.567266	0.127912	0.66035	0.136737	0.837703	0.225924	0.220576
6	rs1737069	0	29838709	A	G	1125	rs1737069_A	12248.3	12250.3	0.858181	0.761257	0.498197	0.953094	0.757767	0.44983	0.729104	0.478032
6	rs1737064	0	29839242	C	A	1126	rs1737064_C	12248.3	12250.2	0.726362	0.547784	0.120009	0.636104	0.128766	0.81236	0.214626	0.209862
6	rs7759474	0	29839614	A	G	1127	rs7759474_A	12248.3	12250.3	0.790859	0.478658	0.947545	0.462086	0.252258	0.296676	0.415899	0.253483
6	rs1611285	0	29839766	G	A	1128	rs1611285_G	12248.3	12246.4	0.0479592	0.222939	0.0884973	0.121454	0.0541936	0.0247434	0.0720796	0.0619048
6	rs1626392	0	29840223	A	G	1129	rs1626392_A	12248.3	12250.3	0.96393	0.626086	0.460207	0.895611	0.35902	0.790264	0.85295	0.771354
6	rs1625636	0	29840281	A	G	1130	rs1625636_A	12248.3	12250.2	0.683935	0.512545	0.107519	0.599229	0.114954	0.766942	0.196118	0.192784
6	rs1633043	0	29840373	A	G	1131	rs1633043_A	12248.3	12249.9	0.506497	0.320951	0.0461228	0.463523	0.0206845	0.379673	0.146625	0.113648
6	rs422343	0	29840409	A	G	1132	rs422343_A	12248.3	12248.5	0.179713	0.637617	0.253612	0.396049	0.201839	0.121746	0.263325	0.214335
6	rs1737060	0	29840948	G	C	1133	rs1737060_G	12248.3	12250.1	0.644999	0.483861	0.0924874	0.54683	0.100787	0.7089	0.177174	0.165765
6	rs1633041	0	29841202	A	G	1134	rs1633041_A	12247.8	12247.6	0.131657	0.000734415	0.945535	0.0346153	0.176801	0.0382308	0.139056	0.1388
6	rs2735048	0	29841680	A	G	1135	rs2735048_A	12241.5	12243.2	0.598112	0.0695153	0.71003	0.17052	0.145167	0.224344	0.225608	0.0952904
6	rs2735046	0	29842077	A	G	1136	rs2735046_A	12248.3	12249.8	0.479097	0.0149233	0.521911	0.138073	0.127155	0.2331	0.136404	0.0575244
6	rs12660712	0	29842613	A	C	1137	rs12660712_A	12248.3	12248.5	0.176999	0.00374083	0.0843299	0.168474	0.157188	0.207478	0.053665	0.0742008
6	rs1737049	0	29843083	G	A	1138	rs1737049_G	12224.7	12225.2	0.229511	0.00291062	0.786499	0.0674053	0.48097	0.132071	0.205523	0.229036
6	rs9258294	0	29843638	A	G	1139	rs9258294_A	12248.3	12248.4	0.165741	0.14705	0.404584	0.235074	0.241978	0.194109	0.413001	0.250658
6	rs1737043	0	29844026	A	G	1140	rs1737043_A	12248	12249.8	0.617657	0.702928	0.372904	0.786378	0.392482	0.750548	0.803832	0.453158
6	rs1737041	0	29844208	A	C	1141	rs1737041_A	12247.2	12246.9	0.123054	0.000643951	0.920507	0.0319078	0.168022	0.0355081	0.13131	0.130011
6	rs11753872	0	29844921	A	C	1142	rs11753872_A	12248.3	12249.9	0.50267	0.406345	0.357567	0.587413	0.0608843	0.125029	0.728074	0.559028
6	rs6932033	0	29845825	G	A	1143	rs6932033_G	12248.3	12250	0.564054	0.457648	0.406183	0.649933	0.0739969	0.148884	0.794714	0.619864
6	rs1610634	0	29846433	G	A	1144	rs1610634_G	12230.4	12231.5	0.362498	0.0333541	0.485229	0.12487	0.705141	0.207554	0.420395	0.455026
6	rs1610726	0	29846644	G	C	1145	rs1610726_G	12248	12248.4	0.205745	0.0023889	0.830068	0.0592823	0.446635	0.11743	0.183064	0.205531
6	rs885940	0	29847036	A	G	1146	rs885940_A	12240.5	12240.4	0.141437	0.000864113	0.977288	0.0391642	0.191457	0.0429341	0.152151	0.149992
6	rs9258302	0	29849317	G	A	1147	rs9258302_G	12247.8	12249.4	0.488285	0.417285	0.513734	0.377349	0.370919	0.405506	0.382347	0.372457
6	rs1362068	0	29850087	G	A	1148	rs1362068_G	12248.3	12249.3	0.322002	0.0275203	0.538859	0.106397	0.645236	0.179995	0.374034	0.406346
6	rs1362070	0	29850278	G	A	1149	rs1362070_G	12247.8	12248.8	0.322573	0.0275285	0.537844	0.106576	0.646014	0.180188	0.373895	0.406202
6	rs1633036	0	29850788	G	A	1150	rs1633036_G	12248.3	12249.8	0.451793	0.288872	0.0338435	0.392412	0.0145288	0.314577	0.117757	0.0909655
6	rs9258304	0	29851414	G	A	1151	rs9258304_G	12248.3	12250.3	0.9283	0.88061	0.59959	0.755988	0.241668	0.291164	0.653021	0.508232
6	rs1633034	0	29851542	G	A	1152	rs1633034_G	12244.3	12244	0.128005	0.000762962	0.988169	0.0296248	0.320211	0.0657551	0.10037	0.126505
6	rs1633030	0	29853773	G	A	1153	rs1633030_G	12244.9	12245.3	0.200828	0.0023422	0.837983	0.0579925	0.442124	0.115433	0.181904	0.203842
6	rs1614309	0	29853863	A	G	1154	rs1614309_A	12182.1	12182.1	0.158819	0.00130591	0.927387	0.0402679	0.368574	0.0853869	0.141263	0.159403
6	rs1633021	0	29854848	G	A	1155	rs1633021_G	12248.3	12249.5	0.366387	0.0041094	0.733352	0.100508	0.389135	0.115324	0.237563	0.310727
6	rs2735042	0	29855352	G	A	1156	rs2735042_G	12242.9	12243.2	0.197957	0.00227887	0.848508	0.0567629	0.43277	0.111744	0.178578	0.200632
6	rs9258384	0	29861847	A	C	1157	rs9258384_A	12246.5	12247.5	0.321817	0.266192	0.56669	0.356395	0.41867	0.366414	0.556144	0.366626
6	rs2743941	0	29863430	A	G	1158	rs2743941_A	12248.3	12250.3	0.853795	0.96787	0.236416	0.837551	0.326197	0.842758	0.418481	0.200921
6	rs1737008	0	29866096	A	G	1159	rs1737008_A	12247	12248.9	0.73131	0.516163	0.0888003	0.656638	0.0472729	0.578521	0.244163	0.200164
6	rs1633012	0	29866705	G	C	1160	rs1633012_G	12235.1	12236.8	0.564438	0.378617	0.0534841	0.491868	0.0233211	0.405558	0.166644	0.129467
6	rs1611205	0	29867802	G	A	1161	rs1611205_G	12188	12189.4	0.431463	0.0517663	0.424055	0.167539	0.766261	0.251244	0.517038	0.529382
6	rs1737004	0	29869190	G	C	1162	rs1737004_G	12233.9	12235.3	0.450895	0.0509598	0.388494	0.181236	0.842524	0.297685	0.551874	0.572386
6	rs1610647	0	29870047	G	A	1163	rs1610647_G	12246.7	12247.7	0.32328	0.0278987	0.53953	0.107519	0.645516	0.18072	0.375585	0.407866
6	rs16895757	0	29870157	A	G	1164	rs16895757_A	12248.3	12249.2	0.298305	0.246793	0.549254	0.555103	0.369664	0.348724	0.467754	0.986397
6	rs1633010	0	29870921	T	A	1165	rs1633010_T	12247.2	12246.9	0.123675	0.000753371	0.973493	0.0285654	0.310141	0.0629724	0.098317	0.123893
6	rs2523415	0	29871978	A	G	1166	rs2523415_A	12245.3	12241.7	0.0184537	0.00444227	0.0356229	0.00541291	0.0343714	0.0668497	0.00572453	0.00929479
6	rs11758087	0	29872422	A	G	1167	rs11758087_A	12248.3	12250	0.547319	0.442191	0.393247	0.634917	0.0707603	0.142752	0.780061	0.607216
6	rs1633005	0	29872451	A	G	1168	rs1633005_A	12248.3	12244	0.0120524	5.66093e-07	0.345035	0.000288845	0.0249896	0.00443967	0.00264149	0.00614025
6	rs11751282	0	29872686	C	A	1169	rs11751282_C	12247.4	12249.1	0.550126	0.443337	0.395673	0.637236	0.0710621	0.143392	0.782058	0.608743
6	rs2523414	0	29873066	G	A	1170	rs2523414_G	12248.3	12247.3	0.0816222	0.0382418	0.119641	0.0372716	0.123021	0.231501	0.0437608	0.0501559
6	rs1629068	0	29873270	G	A	1171	rs1629068_G	12248.3	12248.3	0.150989	0.000988176	0.993846	0.0420361	0.204958	0.0474253	0.16155	0.160467
6	rs1736991	0	29874905	C	G	1172	rs1736991_C	12244.7	12244.2	0.113722	0.000645066	0.941932	0.0258144	0.290893	0.0575825	0.0902658	0.114301
6	rs9258437	0	29875590	A	G	1173	rs9258437_A	12248.3	12250.3	0.974064	0.869819	0.773828	0.965127	0.975788	0.80729	0.775526	0.847615
6	rs3873243	0	29875604	A	C	1174	rs3873243_A	12248.3	12250.3	0.914461	0.981003	0.638093	0.9731	0.712985	0.943953	0.908643	0.946518
6	rs7741100	0	29876102	A	C	1175	rs7741100_A	12248.3	12248.4	0.168396	0.152992	0.406461	0.241074	0.247479	0.200602	0.419775	0.255921
6	rs11751333	0	29876116	A	G	1176	rs11751333_A	12248.3	12250	0.597396	0.478265	0.420116	0.699591	0.0884237	0.179771	0.867959	0.693794
6	rs2517922	0	29876280	C	A	1177	rs2517922_C	12245.7	12241.7	0.0141986	0.00336749	0.0272374	0.00384545	0.0263411	0.0523215	0.00423172	0.00715151
6	rs1611185	0	29876323	G	A	1178	rs1611185_G	12246.3	12247	0.271283	0.0172719	0.51988	0.0982907	0.0751784	0.118868	0.123722	0.117401
6	rs2017525	0	29876482	A	G	1179	rs2017525_A	12248.3	12250.3	0.85372	0.941653	0.370662	0.813729	0.235608	0.437004	0.673516	0.613262
6	rs885937	0	29877042	T	A	1180	rs885937_T	12245.4	12246.5	0.327594	0.0288166	0.53014	0.110244	0.656186	0.185627	0.384268	0.416824
6	rs3891160	0	29877126	G	C	1181	rs3891160_G	12229.2	12231	0.636558	0.609352	0.878426	0.513867	0.532909	0.828361	0.378695	0.590411
6	rs9468626	0	29877225	A	G	1182	rs9468626_A	12247.2	12247.3	0.172133	0.00323007	0.0840142	0.168071	0.154475	0.205243	0.0530538	0.0713563
6	rs1632996	0	29877486	T	A	1183	rs1632996_T	12247.8	12248.9	0.338452	0.0298617	0.517196	0.113768	0.67011	0.191499	0.391662	0.424419
6	rs1736982	0	29877500	A	G	1184	rs1736982_A	12248.3	12250.2	0.721272	0.81594	0.300275	0.900538	0.317169	0.857821	0.697562	0.371073
6	rs4281004	0	29877536	G	A	1185	rs4281004_G	12241.6	12243.2	0.538487	0.377679	0.381472	0.621108	0.064871	0.137564	0.768307	0.538907
6	rs1632995	0	29877600	T	A	1186	rs1632995_T	12247.9	12249	0.324034	0.0278474	0.537243	0.107493	0.647213	0.18086	0.375887	0.408034
6	rs1736981	0	29878301	A	G	1187	rs1736981_A	12248.3	12250.2	0.721272	0.81594	0.300275	0.900538	0.317169	0.857821	0.697562	0.371073
6	rs1632988	0	29880374	A	G	1188	rs1632988_A	12245.4	12245.7	0.190909	0.00141502	0.896367	0.0529919	0.25892	0.0667642	0.202063	0.198084
6	rs1632987	0	29880528	G	C	1189	rs1632987_G	12247.8	12247.7	0.143529	0.000855659	0.987589	0.0392458	0.195648	0.0438818	0.153492	0.151888
6	rs2394173	0	29881137	A	G	1190	rs2394173_A	12248.3	12248.3	1	1	1	1	1	1	1	1
6	rs1632984	0	29881371	A	T	1191	rs1632984_A	12248	12250	0.848361	0.604687	0.161802	0.821379	0.0992454	0.697346	0.355492	0.279656
6	rs1632983	0	29881488	A	G	1192	rs1632983_A	12247.8	12247.4	0.121348	0.000723955	0.966828	0.0279488	0.305556	0.0615117	0.0965248	0.121707
6	rs9258447	0	29881831	A	G	1193	rs9258447_A	12248.3	12250.3	0.90222	0.995974	0.632025	0.962576	0.704614	0.935811	0.89759	0.934921
6	rs1736976	0	29881978	G	A	1194	rs1736976_G	12244.8	12246.2	0.422374	0.0282888	0.527932	0.130281	0.669131	0.19417	0.380332	0.419104
6	rs11751820	0	29882166	A	G	1195	rs11751820_A	12246.6	12248.4	0.655682	0.622189	0.897273	0.537022	0.511842	0.809547	0.390792	0.605233
6	rs11757182	0	29883504	C	A	1196	rs11757182_C	12248.3	12250	0.564054	0.457648	0.406183	0.649933	0.0739969	0.148884	0.794714	0.619864
6	rs2523409	0	29883641	G	A	1197	rs2523409_G	12238.5	12240.4	0.723136	0.0773659	0.768904	0.216751	0.197177	0.304467	0.250022	0.116454
6	rs1736971	0	29884301	A	C	1198	rs1736971_A	12248.3	12248.1	0.135374	0.000777163	0.963603	0.036571	0.185202	0.0407814	0.145702	0.144276
6	rs1736969	0	29884369	A	T	1199	rs1736969_A	12248.3	12248.1	0.137352	0.000803075	0.968348	0.0372764	0.187163	0.0414224	0.147584	0.146089
6	rs4098859	0	29885178	G	A	1200	rs4098859_G	12246.9	12248.5	0.565612	0.458572	0.407344	0.650831	0.0744724	0.149933	0.796318	0.621438
6	rs1632971	0	29885890	A	G	1201	rs1632971_A	12248.3	12250.3	0.832311	0.584911	0.155893	0.806048	0.0955342	0.686292	0.344421	0.269604
6	rs9357086	0	29886008	C	G	1202	rs9357086_C	12248.3	12249.7	0.414941	0.119164	0.63737	0.149849	0.157115	0.182365	0.140137	0.044114
6	rs2523408	0	29886088	C	A	1203	rs2523408_C	12248.3	12249.5	0.369865	0.0337802	0.519771	0.141432	0.471024	0.139676	0.518357	0.479905
6	rs9295820	0	29886480	C	G	1204	rs9295820_C	12241.2	12241.9	0.262126	0.679239	0.716577	0.427889	0.625223	0.573252	0.696035	0.674734
6	rs1610663	0	29886605	A	G	1205	rs1610663_A	12247.8	12249	0.369638	0.0336935	0.518973	0.14122	0.472229	0.140156	0.519052	0.480571
6	rs1610699	0	29886966	C	A	1206	rs1610699_C	12221.9	12223.3	0.413996	0.0390495	0.473464	0.16241	0.514623	0.159287	0.565429	0.529161
6	rs1610669	0	29888072	A	T	1207	rs1610669_A	12189.5	12190.5	0.31671	0.0271106	0.556973	0.108353	0.618309	0.167103	0.374038	0.403318
6	rs1610707	0	29890027	A	C	1208	rs1610707_A	12246	12246.3	0.191815	0.00255769	0.768304	0.0585997	0.0990441	0.0331343	0.160179	0.1473
6	rs11753629	0	29890310	A	G	1209	rs11753629_A	12248.3	12250.1	0.639218	0.166955	0.764083	0.732764	0.759789	0.74074	0.688985	0.666977
6	rs1736959	0	29890449	A	G	1210	rs1736959_A	12183.8	12183.3	0.113141	0.000497966	0.890759	0.0294047	0.154933	0.033791	0.122868	0.121272
6	rs1633105	0	29891361	G	A	1211	rs1633105_G	12248.3	12249.4	0.32941	0.0374305	0.823428	0.110091	0.345608	0.112976	0.320207	0.326382
6	rs1619379	0	29893214	A	G	1212	rs1619379_A	12247.6	12249.4	0.605052	0.0984415	0.40119	0.213463	0.917128	0.385145	0.687809	0.466866
6	rs2735028	0	29893517	A	G	1213	rs2735028_A	12247.8	12248.5	0.244186	0.0167053	0.619085	0.0917455	0.527592	0.15029	0.392171	0.422863
6	rs1736951	0	29893755	A	G	1214	rs1736951_A	12247.8	12248.4	0.231105	0.0151335	0.639601	0.0858434	0.509098	0.141868	0.376301	0.406162
6	rs2743933	0	29894199	G	A	1215	rs2743933_G	12247.8	12247.6	0.136801	0.745227	0.20099	0.232898	0.0972481	0.0392162	0.0808844	0.0859744
6	rs2743931	0	29895051	G	A	1216	rs2743931_G	12248.3	12250.3	0.826151	0.583926	0.153121	0.798215	0.0939225	0.680129	0.340555	0.266546
6	rs2394177	0	29895348	G	A	1217	rs2394177_G	12248.3	12250.3	0.828495	0.6942	0.787913	0.911733	0.961728	0.881196	0.8794	0.919275
6	rs3873245	0	29896516	A	G	1218	rs3873245_A	12248.3	12249	0.241854	0.208899	0.461414	0.468011	0.306571	0.294069	0.396703	0.905104
6	rs1610677	0	29897150	G	A	1219	rs1610677_G	12247.8	12249.5	0.554203	0.0356294	0.741997	0.180481	0.711649	0.352499	0.401146	0.259898
6	rs1611149	0	29897978	A	G	1220	rs1611149_A	12248.3	12250.2	0.690187	0.159848	0.501911	0.245372	0.889474	0.432701	0.629541	0.437869
6	rs1632949	0	29901703	G	A	1221	rs1632949_G	12228.6	12230	0.435326	0.0151213	0.651771	0.139741	0.706338	0.29307	0.424839	0.263438
6	rs1632948	0	29902028	G	A	1222	rs1632948_G	12237.7	12239.5	0.683889	0.15743	0.505249	0.242604	0.890927	0.43499	0.630319	0.439423
6	rs1736936	0	29902296	A	G	1223	rs1736936_A	12247.8	12249.4	0.525029	0.0329835	0.777344	0.165955	0.680398	0.334096	0.379135	0.242231
6	rs1736935	0	29902422	G	A	1224	rs1736935_G	12202.5	12204.3	0.686019	0.155583	0.514922	0.242261	0.871098	0.419195	0.617917	0.426966
6	rs3115630	0	29902480	A	G	1225	rs3115630_A	12245.3	12247.2	0.769958	0.423176	0.082282	0.681964	0.0515523	0.72297	0.236091	0.400764
6	rs1632942	0	29904619	G	A	1226	rs1632942_G	12237.8	12239.7	0.738801	0.178577	0.479106	0.261409	0.92846	0.464999	0.649023	0.451618
6	rs1632933	0	29905912	A	G	1227	rs1632933_A	12247.8	12249.5	0.56616	0.0369174	0.727261	0.186287	0.726835	0.362714	0.41104	0.267236
6	rs1233330	0	29907082	A	G	1228	rs1233330_A	12248.3	12250.3	0.814446	0.571784	0.150407	0.790393	0.0918433	0.671823	0.333371	0.25792
6	rs1610682	0	29909303	G	A	1229	rs1610682_G	12248.3	12241.8	0.00355873	1.19613e-07	0.249313	0.000129083	0.0119001	0.00169769	0.00225474	0.00294886
6	rs2517892	0	29909453	G	A	1230	rs2517892_G	12175.4	12173.6	0.0502407	0.00230128	0.0966119	0.0530817	0.0392804	0.0632429	0.0307445	0.0787406
6	rs2735020	0	29910964	A	C	1231	rs2735020_A	12248.3	12247.9	0.118695	0.0343396	0.098795	0.0390533	0.0440506	0.0914731	0.0266188	0.0257728
6	rs2523790	0	29911629	C	A	1232	rs2523790_C	12244.8	12242.9	0.0474115	0.00199551	0.0962524	0.0495643	0.0392939	0.0599174	0.0284109	0.0722595
6	rs16896049	0	29911709	C	G	1233	rs16896049_C	12248.3	12249.5	0.364582	0.30873	0.656955	0.660102	0.455392	0.416936	0.560725	0.870438
6	rs2735018	0	29912388	C	G	1234	rs2735018_C	12245.9	12245.4	0.114496	0.036657	0.0924764	0.0369077	0.0418432	0.0884566	0.0255284	0.0243985
6	rs2394180	0	29913178	G	A	1235	rs2394180_G	12248.3	12250	0.580468	0.130868	0.703283	0.66927	0.698653	0.700127	0.609232	0.605183
6	rs2735014	0	29913788	A	C	1236	rs2735014_A	12245.2	12244.9	0.126092	0.0075818	0.141973	0.0720758	0.0848421	0.138838	0.0494193	0.0478018
6	rs7755504	0	29914012	C	G	1237	rs7755504_C	12247.9	12249.9	0.798672	0.137372	0.545713	0.855449	0.738113	0.897244	0.537662	0.579423
6	rs2517887	0	29915372	G	C	1238	rs2517887_G	12248.3	12247.8	0.115132	0.00658061	0.130076	0.0653519	0.0771728	0.125866	0.0443237	0.0427567
6	rs2735005	0	29916443	A	G	1239	rs2735005_A	12174.5	12176.2	0.645339	0.123418	0.828925	0.615294	0.549324	0.696019	0.469485	0.738591
6	rs2735003	0	29916613	C	A	1240	rs2735003_C	12248.3	12248.4	0.169902	0.0123596	0.188864	0.104708	0.118213	0.186099	0.0718962	0.0702095
6	rs2523776	0	29917173	C	A	1241	rs2523776_C	12248.3	12247.9	0.117609	0.0361635	0.0954918	0.0374719	0.043799	0.0924943	0.0261568	0.0255072
6	rs4959033	0	29917283	C	A	1242	rs4959033_C	12248.3	12250.2	0.766398	0.900391	0.678434	0.715919	0.72206	0.827784	0.770527	0.679635
6	rs1611133	0	29917361	A	G	1243	rs1611133_A	12248.3	12242.5	0.00510221	2.3467e-07	0.291332	0.000206425	0.0158092	0.00246961	0.00321885	0.00420295
6	rs3900925	0	29917935	A	G	1244	rs3900925_A	12248.3	12249.7	0.414643	0.354516	0.732136	0.732186	0.509691	0.470161	0.629495	0.798124
6	rs4607472	0	29918522	G	A	1245	rs4607472_G	12248.3	12250.1	0.626813	0.460733	0.993127	0.703201	0.834987	0.716437	0.876087	0.831213
6	rs2844827	0	29919216	G	A	1246	rs2844827_G	12247.8	12246.1	0.0518638	0.0110333	0.148715	0.0498933	0.0472697	0.0589523	0.0455899	0.107358
6	rs4084096	0	29919847	A	C	1247	rs4084096_A	12248.3	12249.3	0.309759	0.197037	0.743181	0.543181	0.484239	0.389647	0.590053	0.959575
6	rs2734994	0	29920009	A	G	1248	rs2734994_A	12248.3	12248	0.127894	0.0371489	0.104343	0.0413829	0.0478375	0.0977955	0.0280943	0.0273977
6	rs2734990	0	29920484	A	T	1249	rs2734990_A	12248.3	12246.5	0.0514148	0.0108634	0.147713	0.0494074	0.0469643	0.0585389	0.0451144	0.106528
6	rs2523767	0	29920786	G	A	1250	rs2523767_G	12248.3	12246.5	0.0514148	0.0108634	0.147713	0.0494074	0.0469643	0.0585389	0.0451144	0.106528
6	rs9258557	0	29921921	A	G	1251	rs9258557_A	12248.3	12248	0.127894	0.0371489	0.104343	0.0413829	0.0478375	0.0977955	0.0280943	0.0273977
6	rs4081563	0	29922343	G	A	1252	rs4081563_G	12248.3	12249.5	0.364582	0.30873	0.656955	0.660102	0.455392	0.416936	0.560725	0.870438
6	rs3115629	0	29923692	G	A	1253	rs3115629_G	12239.6	12241.6	0.908469	0.649898	0.179823	0.875098	0.108559	0.728347	0.377199	0.294006
6	rs2394186	0	29924400	G	A	1254	rs2394186_G	12248.3	12250.3	0.957992	0.499284	0.432415	0.645763	0.556163	0.438604	0.887769	0.505316
6	rs2523765	0	29925085	A	T	1255	rs2523765_A	12248.3	12244.8	0.0184649	4.6467e-05	0.101593	0.00162039	0.00186288	0.00483285	0.00346487	0.0027228
6	rs9380146	0	29925223	A	G	1256	rs9380146_A	12248.3	12249.3	0.30916	0.075091	0.577374	0.112596	0.115295	0.111399	0.114252	0.030089
6	rs11759549	0	29925902	C	G	1257	rs11759549_C	12248.3	12250.2	0.77793	0.12575	0.530226	0.838648	0.721412	0.879392	0.522112	0.562151
6	rs2734986	0	29926547	G	A	1258	rs2734986_G	12248.3	12245.7	0.0316071	1.78993e-06	0.607503	0.00102745	0.0784563	0.0210412	0.0115393	0.024663
6	rs2734985	0	29926641	G	A	1259	rs2734985_G	12248.3	12248.1	0.137772	0.000478757	0.851307	0.00866682	0.26036	0.114682	0.0649507	0.0400282
6	rs2517868	0	29927317	A	C	1260	rs2517868_A	12248	12248.6	0.242284	0.000980043	0.985663	0.0171248	0.343604	0.164593	0.0915929	0.0592058
6	rs2508050	0	29928026	G	A	1261	rs2508050_G	12248.3	12246.5	0.050558	0.236019	0.161561	0.110377	0.0539431	0.0206486	0.0866516	0.0522724
6	rs3115627	0	29928257	G	A	1262	rs3115627_G	12241.7	12243.3	0.535468	0.0687142	0.718878	0.161509	0.160788	0.237443	0.246781	0.111376
6	rs5013093	0	29928565	A	G	1263	rs5013093_A	12247.7	12247.7	0.155956	0.00058729	0.903498	0.0107003	0.288007	0.12789	0.0744382	0.0468375
6	rs2523756	0	29928696	G	A	1264	rs2523756_G	12248.3	12250.3	0.816945	0.149494	0.500382	0.357723	0.908981	0.652247	0.668815	0.577014
6	rs2734984	0	29928810	G	A	1265	rs2734984_G	12242.2	12242.2	0.156716	0.000598282	0.907465	0.0107383	0.291534	0.130023	0.0759894	0.0479371
6	rs9258631	0	29929272	C	A	1266	rs9258631_C	12247.8	12249.4	0.497319	0.363131	0.365296	0.242139	0.265947	0.482341	0.265385	0.235515
6	rs2734982	0	29929546	A	C	1267	rs2734982_A	12231.3	12231.6	0.189216	0.0359474	0.345002	0.0451992	0.0289228	0.0331161	0.0469382	0.0150681
6	rs2734980	0	29929875	A	G	1268	rs2734980_A	12248.3	12248.3	0.156961	0.000590752	0.907402	0.0107615	0.290128	0.128874	0.0748788	0.0471008
6	rs2517862	0	29929916	A	G	1269	rs2517862_A	12243.3	12240.9	0.0371789	2.6182e-06	0.657768	0.0014236	0.0914894	0.0250508	0.0144341	0.030204
6	rs2517861	0	29929961	A	G	1270	rs2517861_A	12241.6	12241.3	0.130743	0.000410801	0.834989	0.00813717	0.252257	0.108434	0.0602516	0.037057
6	rs2975033	0	29930240	A	G	1271	rs2975033_A	12248.3	12248.7	0.204014	0.0440315	0.36749	0.0511743	0.03313	0.0376302	0.0539014	0.0175172
6	rs9258651	0	29930334	A	G	1272	rs9258651_A	12247.8	12249.8	0.820649	0.151429	0.497372	0.359631	0.905419	0.655634	0.672104	0.580392
6	rs3094175	0	29930902	T	A	1273	rs3094175_T	12215.9	12217.9	0.857953	0.164451	0.464115	0.382977	0.870967	0.670276	0.692998	0.604111
6	rs2428510	0	29931006	A	G	1274	rs2428510_A	12246.2	12248.2	0.837166	0.156491	0.483179	0.371293	0.892993	0.666638	0.68945	0.596859
6	rs3128909	0	29931550	A	T	1275	rs3128909_A	12248.3	12249.6	0.407271	0.240564	0.101052	0.446854	0.0392846	0.318268	0.220851	0.120579
6	rs3132726	0	29931585	A	G	1276	rs3132726_A	12244.9	12246.7	0.613187	0.656164	0.200269	0.565306	0.0700983	0.374502	0.378927	0.222891
6	rs6919513	0	29931973	A	G	1277	rs6919513_A	12247.8	12249.8	0.820649	0.151429	0.497372	0.359631	0.905419	0.655634	0.672104	0.580392
6	rs9258679	0	29932038	G	A	1278	rs9258679_G	12248.3	12250.3	0.821109	0.151853	0.4976	0.360173	0.905935	0.655328	0.672106	0.580355
6	rs2517840	0	29934071	A	G	1279	rs2517840_A	12248	12248.3	0.19326	0.0406026	0.351939	0.0475097	0.0304923	0.0347216	0.0500595	0.0161034
6	rs1611697	0	29935364	C	A	1280	rs1611697_C	12248.3	12245.9	0.0350286	0.35886	0.0316448	0.0428602	0.0114307	0.00310697	0.00659582	0.00731164
6	rs9258739	0	29935642	A	G	1281	rs9258739_A	12248.3	12248.2	0.14628	0.0244123	0.251688	0.118305	0.113657	0.15747	0.113549	0.228937
6	rs1611699	0	29935732	T	A	1282	rs1611699_T	12248.3	12250.3	0.805088	0.145302	0.510898	0.349065	0.923535	0.637842	0.656097	0.564711
6	rs9258740	0	29935878	A	G	1283	rs9258740_A	12247.8	12248.7	0.276316	0.0863125	0.402827	0.159326	0.237709	0.325493	0.206161	0.188487
6	rs3094657	0	29936289	G	C	1284	rs3094657_G	12231	12232.6	0.566565	0.61331	0.174176	0.518716	0.0583451	0.331218	0.341532	0.196403
6	rs2523822	0	29936639	G	A	1285	rs2523822_G	12248.3	12248.6	0.192205	0.0400901	0.349862	0.0471144	0.030267	0.0344969	0.0495555	0.0159115
6	rs1611710	0	29936895	A	G	1286	rs1611710_A	12247.2	12249.2	0.806685	0.147406	0.510262	0.347901	0.921463	0.639922	0.65775	0.5675
6	rs1611715	0	29937461	C	A	1287	rs1611715_C	12247.8	12249.4	0.512047	0.0637401	0.696412	0.15305	0.15249	0.226422	0.23469	0.10405
6	rs1611717	0	29937556	G	A	1288	rs1611717_G	12244.8	12246.8	0.847428	0.161709	0.475806	0.377662	0.878247	0.681722	0.695402	0.602853
6	rs9258762	0	29937634	A	G	1289	rs9258762_A	12248.3	12250.2	0.750865	0.88034	0.930171	0.947441	0.558548	0.671968	0.884316	0.737854
6	rs3094169	0	29937965	A	G	1290	rs3094169_A	12248.3	12249.6	0.407271	0.240564	0.101052	0.446854	0.0392846	0.318268	0.220851	0.120579
6	rs7760172	0	29938053	G	A	1291	rs7760172_G	12247.4	12248.9	0.505915	0.129006	0.53512	0.713913	0.745401	0.876417	0.511591	0.559423
6	rs9258766	0	29938390	A	G	1292	rs9258766_A	12247.8	12247.8	0.154975	0.0264952	0.264782	0.125525	0.120641	0.165904	0.121322	0.241976
6	rs9258771	0	29938631	G	A	1293	rs9258771_G	12248.3	12248.3	0.151042	0.0254776	0.259198	0.121892	0.118013	0.163069	0.118061	0.236991
6	rs1611732	0	29938987	A	G	1294	rs1611732_A	12248.3	12250.3	0.821109	0.151853	0.4976	0.360173	0.905935	0.655328	0.672106	0.580355
6	rs765649	0	29939037	A	T	1295	rs765649_A	12248.3	12250.3	0.795143	0.143025	0.519076	0.3428	0.930953	0.632276	0.646378	0.555768
6	rs1611737	0	29939550	G	C	1296	rs1611737_G	12244.9	12246.9	0.830131	0.154805	0.488691	0.366855	0.893825	0.666047	0.682129	0.590082
6	rs2524035	0	29940311	A	G	1297	rs2524035_A	12248.3	12250.3	0.85617	0.777819	0.334289	0.990311	0.174695	0.77808	0.59018	0.469478
6	rs7760545	0	29941451	A	C	1298	rs7760545_A	12244.1	12240.7	0.0203225	0.0138223	0.0253139	0.0123518	0.024333	0.0176372	0.0102428	0.016873
6	rs3094165	0	29941520	A	G	1299	rs3094165_A	12244.1	12245	0.292133	0.200554	0.759206	0.234135	0.664998	0.665485	0.705186	0.821325
6	rs2734974	0	29941758	G	A	1300	rs2734974_G	12243.9	12244.3	0.217901	0.00052356	0.855772	0.0477779	0.297202	0.0803915	0.131315	0.197398
6	rs2734973	0	29941927	A	G	1301	rs2734973_A	12248.3	12247	0.0694139	0.28053	0.268608	0.172426	0.204525	0.0902278	0.180355	0.155655
6	rs2734971	0	29942428	A	G	1302	rs2734971_A	12151.3	12151.5	0.175428	0.0196254	0.998237	0.055653	0.493576	0.132215	0.178425	0.0846563
6	rs3094161	0	29943052	A	G	1303	rs3094161_A	12200.2	12200.7	0.226009	0.081818	0.759582	0.427782	0.767291	0.493786	0.736797	0.836923
6	rs3132721	0	29943612	G	A	1304	rs3132721_G	12113.6	12114.9	0.402563	0.176177	0.490752	0.68186	0.487148	0.793771	0.966102	0.579702
6	rs3094159	0	29943813	G	A	1305	rs3094159_G	12241.3	12241.9	0.237751	0.0871686	0.734173	0.449404	0.736898	0.521289	0.763286	0.811159
6	rs1611635	0	29944442	A	G	1306	rs1611635_A	12248.3	12245.6	0.0301132	1.66679e-06	0.599467	0.000965375	0.0773971	0.020654	0.0111817	0.0240209
6	rs9258866	0	29944503	A	C	1307	rs9258866_A	12248.3	12248.8	0.216171	0.186099	0.496133	0.30497	0.304826	0.249674	0.50702	0.318785
6	rs3132718	0	29944556	A	G	1308	rs3132718_A	12248	12248.7	0.241156	0.0888536	0.726773	0.454451	0.727473	0.526364	0.773406	0.798941
6	rs1611636	0	29944682	C	A	1309	rs1611636_C	12248.3	12248.1	0.13435	0.744568	0.201526	0.227609	0.0969232	0.0385134	0.0801541	0.0850311
6	rs9258881	0	29945121	G	A	1310	rs9258881_G	12248.3	12249	0.241955	0.0894088	0.725226	0.455812	0.72599	0.527324	0.774925	0.797281
6	rs886398	0	29947247	A	G	1311	rs886398_A	12228.9	12226.9	0.0437876	0.203902	0.142047	0.0952831	0.045648	0.0167408	0.0742485	0.0442527
6	rs3132714	0	29948627	A	G	1312	rs3132714_A	12248.3	12248.9	0.240149	0.088073	0.728893	0.452689	0.729929	0.524213	0.770725	0.80135
6	rs3128888	0	29949335	C	G	1313	rs3128888_C	12247.1	12249	0.853443	0.598983	0.157126	0.813171	0.0934037	0.676947	0.336368	0.259499
6	rs3132708	0	29949615	A	G	1314	rs3132708_A	12124.6	12126.5	0.759866	0.428091	0.223016	0.903812	0.199075	0.775693	0.566577	0.260685
6	rs2523809	0	29957598	A	C	1315	rs2523809_A	12248.3	12247	0.0678789	0.274515	0.265315	0.169007	0.200895	0.0884905	0.177164	0.152936
6	rs2734959	0	29957666	G	C	1316	rs2734959_G	12233.2	12235.2	0.937379	0.326435	0.331824	0.887295	0.27974	0.654345	0.610562	0.283268
6	rs2523807	0	29958253	G	A	1317	rs2523807_G	12242.4	12240	0.0354147	0.180321	0.121497	0.0806987	0.0374981	0.013821	0.0623555	0.0364809
6	rs9259852	0	30004400	G	A	1318	rs9259852_G	12247.5	12249.4	0.752101	0.851612	0.914544	0.940618	0.555342	0.673701	0.884697	0.741911
6	rs2524005	0	30007656	A	G	1319	rs2524005_A	12245.4	12244.9	0.115649	0.000324975	0.947856	0.00622186	0.173177	0.051757	0.0553642	0.0901346
6	rs2734905	0	30012908	C	A	1320	rs2734905_C	12191.8	12190.7	0.0805365	0.00380648	0.171181	0.00664804	0.0186505	0.0248284	0.00824058	0.0016077
6	rs2860580	0	30014670	A	G	1321	rs2860580_A	12248.3	12250.1	0.663999	0.0088214	0.776243	0.164556	0.238505	0.373027	0.164385	0.0669922
6	rs3094141	0	30017786	A	C	1322	rs3094141_A	12190.6	12192.6	0.81979	0.583268	0.140231	0.771492	0.0857901	0.636131	0.310759	0.24088
6	rs3823339	0	30020947	C	G	1323	rs3823339_C	12247.6	12248.2	0.227312	0.20712	0.516692	0.320505	0.323401	0.260837	0.531538	0.336168
6	rs2499	0	30021521	A	C	1324	rs2499_A	12242.5	12244.5	0.855638	0.598032	0.1556	0.817444	0.0924621	0.681481	0.33497	0.259704
6	rs6921314	0	30022199	A	G	1325	rs6921314_A	12248.3	12250.3	0.862991	0.729102	0.601153	0.963491	0.386581	0.653796	0.929388	0.67312
6	rs376646	0	30022356	A	G	1326	rs376646_A	12168.7	12169.5	0.283976	0.000850162	0.385882	0.0294688	0.0807974	0.175352	0.0305038	0.0104371
6	rs2735097	0	30023280	A	C	1327	rs2735097_A	12248.3	12247.8	0.110467	0.00627064	0.205964	0.0089239	0.0243807	0.0333988	0.0103306	0.00213311
6	rs1632882	0	30024347	A	C	1328	rs1632882_A	12187.1	12186.4	0.102296	0.000160022	0.586142	0.00475418	0.152143	0.0603635	0.0317367	0.018475
6	rs417162	0	30024484	G	A	1329	rs417162_G	12248.3	12248.9	0.237171	0.000530511	0.31813	0.0191658	0.0588857	0.137724	0.0201909	0.00630919
6	rs1655906	0	30026233	A	T	1330	rs1655906_A	12248	12250	0.845351	0.692552	0.389315	0.968968	0.370804	0.799574	0.583128	0.388591
6	rs2508037	0	30026415	A	G	1331	rs2508037_A	12247.3	12247.9	0.245614	0.000566602	0.329205	0.0203124	0.0619982	0.143596	0.0214339	0.00677672
6	rs9260461	0	30027808	A	G	1332	rs9260461_A	12150	12147.5	0.0344593	0.242553	0.096237	0.0873603	0.109538	0.0451104	0.0493632	0.0701014
6	rs9260491	0	30028368	A	G	1333	rs9260491_A	12209.3	12208.9	0.117226	0.555081	0.264116	0.241868	0.293531	0.142919	0.157306	0.208416
6	rs1632874	0	30030102	C	A	1334	rs1632874_C	12223.1	12225	0.746586	0.507367	0.11898	0.708974	0.0698443	0.588738	0.269686	0.204375
6	rs9260570	0	30030117	A	G	1335	rs9260570_A	12235.4	12235.8	0.193903	0.729085	0.392887	0.363878	0.423629	0.220329	0.247798	0.315952
6	rs16896742	0	30030719	G	A	1336	rs16896742_G	12239.9	12238.2	0.0525769	0.000718893	0.108084	0.00473773	0.0140976	0.022931	0.00395273	0.000826988
6	rs3893538	0	30032404	G	A	1337	rs3893538_G	12244	12245.8	0.669213	0.103878	0.71813	0.314985	0.83881	0.987935	0.402791	0.439666
6	rs892666	0	30032707	A	G	1338	rs892666_A	12237.2	12238.3	0.363925	0.14284	0.965902	0.369933	0.612248	0.810474	0.54784	0.871497
6	rs12665039	0	30032758	G	A	1339	rs12665039_G	12248.3	12244.1	0.0124476	0.000449325	0.0163543	0.0214704	0.039106	0.0497551	0.00829039	0.0162994
6	rs2523942	0	30033065	C	A	1340	rs2523942_C	12247.1	12247.8	0.261486	0.887481	0.504472	0.471062	0.556007	0.314564	0.338176	0.426384
6	rs2517701	0	30033951	A	T	1341	rs2517701_A	12248.3	12247.5	0.0917541	0.00566383	0.182262	0.00887983	0.0193074	0.033582	0.00976664	0.00197429
6	rs2523937	0	30035200	C	G	1342	rs2523937_C	12248.3	12250.3	0.821368	0.217734	0.670334	0.60113	0.560634	0.861062	0.593308	0.913213
6	rs2571400	0	30035701	G	C	1343	rs2571400_G	12218.4	12220.1	0.562008	0.204504	0.640085	0.273451	0.845013	0.38099	0.435866	0.259976
6	rs9260705	0	30037170	A	G	1344	rs9260705_A	12079.8	12081.7	0.760113	0.768682	0.941326	0.884709	0.690558	0.777815	0.923513	0.774247
6	rs2517689	0	30037232	A	G	1345	rs2517689_A	12248.3	12249.1	0.272782	0.0064572	0.440261	0.049191	0.0616977	0.158167	0.0772823	0.0519106
6	rs7739434	0	30038598	G	A	1346	rs7739434_G	12222.7	12224.6	0.677211	0.850874	0.560915	0.77397	0.410329	0.766267	0.953895	0.938955
6	rs2571402	0	30040359	T	A	1347	rs2571402_T	12150.8	12149	0.0538442	0.00023431	0.0892545	0.00999753	0.00484392	0.0259656	0.00996541	0.0091248
6	rs9260734	0	30040645	A	G	1348	rs9260734_A	12247.8	12249.1	0.397261	0.17987	0.346988	0.307656	0.215333	0.340768	0.236351	0.46629
6	rs3903160	0	30040876	A	G	1349	rs3903160_A	12247.1	12247.6	0.220458	0.0601391	0.418594	0.0724217	0.0377782	0.0548282	0.0743726	0.0255518
6	rs3873283	0	30040979	G	A	1350	rs3873283_G	12242.6	12243.8	0.386925	0.170053	0.329484	0.292467	0.201549	0.323808	0.222124	0.442664
6	rs6457109	0	30041240	G	A	1351	rs6457109_G	12245.3	12247.3	0.8588	0.871368	0.891607	0.802045	0.557144	0.830293	0.958524	0.948188
6	rs2844806	0	30041418	G	A	1352	rs2844806_G	12248.3	12250.1	0.633638	0.0671573	0.423178	0.271365	0.796209	0.659164	0.665364	0.301312
6	rs6457110	0	30041860	T	A	1353	rs6457110_T	12246.8	12247.9	0.365618	0.0524	0.427717	0.0594697	0.114482	0.209609	0.0560127	0.0239814
6	rs6914699	0	30042001	G	A	1354	rs6914699_G	12244.8	12245.6	0.26813	0.0760774	0.357687	0.0554344	0.0598996	0.130168	0.0519823	0.0286196
6	rs3893259	0	30042433	A	G	1355	rs3893259_A	12248.3	12250.2	0.714672	0.463877	0.0840937	0.71999	0.0430347	0.616012	0.291087	0.373182
6	rs4713270	0	30042676	A	G	1356	rs4713270_A	12245.2	12246.5	0.382194	0.074282	0.723332	0.120571	0.159586	0.208594	0.181974	0.0560133
6	rs3893464	0	30043229	A	G	1357	rs3893464_A	12248.3	12249.7	0.44111	0.175665	0.884596	0.0981367	0.557801	0.226042	0.195032	0.10152
6	rs9260759	0	30043351	A	G	1358	rs9260759_A	12248.3	12250.3	0.928797	0.695674	0.474388	0.50973	0.704158	0.945994	0.298815	0.466353
6	rs4959036	0	30044114	C	A	1359	rs4959036_C	12248.3	12250.2	0.695247	0.445528	0.0803702	0.704218	0.0408927	0.601439	0.279894	0.359647
6	rs4959037	0	30044286	A	T	1360	rs4959037_A	12248.3	12249.3	0.301681	0.0859134	0.536008	0.107916	0.068293	0.108173	0.136821	0.0525743
6	rs12193110	0	30045083	A	G	1361	rs12193110_A	12247.8	12248.8	0.300503	0.0850021	0.534563	0.107036	0.0679822	0.107698	0.135864	0.0522085
6	rs12193208	0	30045128	A	C	1362	rs12193208_A	12244.3	12245.4	0.324884	0.0952646	0.56581	0.118914	0.075921	0.119144	0.149521	0.0585284
6	rs2517673	0	30045221	A	G	1363	rs2517673_A	12185.2	12186.6	0.442757	0.551778	0.705068	0.546476	0.611014	0.334245	0.529667	0.589682
6	rs4713274	0	30045472	C	G	1364	rs4713274_C	12244.8	12245.7	0.280068	0.0486604	0.576722	0.0786207	0.0952106	0.113104	0.0989143	0.0259267
6	rs2256539	0	30045719	G	A	1365	rs2256539_G	12244.3	12246.2	0.764522	0.56981	0.412641	0.943151	0.24804	0.563245	0.792726	0.505383
6	rs2256543	0	30045812	A	G	1366	rs2256543_A	12246.9	12248.2	0.406913	0.00560467	0.464225	0.09256	0.114039	0.317809	0.0806269	0.0798665
6	rs3202637	0	30045875	G	A	1367	rs3202637_G	12248	12249.7	0.546738	0.5127	0.14447	0.497005	0.0878056	0.55655	0.389398	0.174793
6	rs1061535	0	30045903	A	G	1368	rs1061535_A	12248.3	12248.9	0.239804	0.187292	0.0664088	0.340144	0.0210845	0.273656	0.211423	0.192428
6	rs6457116	0	30046004	A	G	1369	rs6457116_A	12248.3	12247.7	0.103508	0.162435	0.100218	0.0349564	0.16086	0.260149	0.0332455	0.0305537
6	rs2523971	0	30046237	A	C	1370	rs2523971_A	12247.8	12249	0.346985	0.0070634	0.994013	0.0786208	0.241375	0.138741	0.177955	0.145978
6	rs12195260	0	30046434	A	G	1371	rs12195260_A	12245.2	12246.7	0.464297	0.0968635	0.822839	0.15608	0.204118	0.260505	0.227941	0.0734785
6	rs116810211	0	30046550	A	C	1372	rs116810211_A	12185.8	12187	0.376298	0.0120663	0.930325	0.0871956	0.447648	0.244436	0.170185	0.167255
6	rs114840911	0	30046637	G	A	1373	rs114840911_G	12248.3	12250.1	0.670031	0.611944	0.381383	0.999667	0.0987574	0.187733	0.686201	0.928399
6	rs114690890	0	30046756	T	A	1374	rs114690890_T	12244.9	12246.8	0.688196	0.101785	0.475828	0.426767	0.583941	0.997956	0.452132	0.435418
6	rs2523969	0	30046756	T	A	1375	rs2523969_T	12248.3	12250.2	0.683704	0.102075	0.470725	0.424627	0.577972	0.996991	0.447637	0.430827
6	rs115068286	0	30046832	A	C	1376	rs115068286_A	12230.6	12232.6	0.999903	0.521547	0.667162	0.897691	0.552102	0.925478	0.976592	0.626564
6	rs114009945	0	30046911	A	G	1377	rs114009945_A	12245.5	12247.5	0.98382	0.547464	0.656842	0.905434	0.52118	0.894211	0.994144	0.619995
6	rs2735079	0	30046911	A	G	1378	rs2735079_A	12248.3	12250.3	0.972579	0.544493	0.642175	0.9275	0.521122	0.895426	0.990817	0.598187
6	rs114622755	0	30047091	G	C	1379	rs114622755_G	12216.9	12218.9	0.989854	0.677676	0.167695	0.99935	0.0985126	0.893134	0.482581	0.590824
6	rs116608358	0	30047273	A	G	1380	rs116608358_A	12222.8	12224.2	0.438415	0.0157994	0.835433	0.108768	0.508441	0.28666	0.203808	0.200856
6	rs2523964	0	30047273	A	G	1381	rs2523964_A	12248.3	12249.7	0.447242	0.0160636	0.815628	0.110303	0.527644	0.298212	0.211488	0.2077
6	rs115178329	0	30047462	A	T	1382	rs115178329_A	12245.4	12246.9	0.455693	0.0167992	0.804359	0.11401	0.535691	0.303836	0.217691	0.214077
6	rs116119596	0	30047493	A	G	1383	rs116119596_A	12242.4	12244.2	0.611079	0.651565	0.331772	0.927028	0.0812235	0.157311	0.629042	0.993612
6	rs114059410	0	30047523	A	G	1384	rs114059410_A	12213.1	12214.5	0.420867	0.0135769	0.850405	0.10182	0.498491	0.277191	0.199195	0.195887
6	rs115385400	0	30047559	A	G	1385	rs115385400_A	12222.6	12224.3	0.572477	0.0609288	0.501653	0.390203	0.851206	0.735953	0.483785	0.541269
6	rs2523961	0	30047559	A	G	1386	rs2523961_A	12248.3	12249.9	0.514263	0.0518073	0.456359	0.350491	0.796849	0.788124	0.446871	0.500608
6	rs116761360	0	30047656	A	T	1387	rs116761360_A	12236.9	12238.9	0.912598	0.907702	0.278128	0.941419	0.239124	0.908782	0.651006	0.419628
6	rs114555025	0	30047831	A	G	1388	rs114555025_A	12221.7	12223.7	0.928088	0.584472	0.603196	0.975518	0.481456	0.845325	0.944071	0.557518
6	rs435766	0	30047831	A	G	1389	rs435766_A	12225.5	12227.5	0.972882	0.543663	0.644798	0.925637	0.528693	0.909408	0.996905	0.606521
6	rs116441341	0	30047957	A	C	1390	rs116441341_A	12119.7	12117.6	0.0424109	0.000254638	0.281328	0.00451366	0.0550983	0.0196506	0.0117001	0.0110535
6	rs115836634	0	30047981	A	G	1391	rs115836634_A	12248.3	12250	0.590524	0.436289	0.407431	0.676368	0.069997	0.150992	0.815833	0.577934
6	rs115932477	0	30048239	G	A	1392	rs115932477_G	12225.5	12227.5	0.922439	0.635138	0.532941	0.972525	0.431497	0.801521	0.847899	0.480642
6	rs114499818	0	30048351	A	G	1393	rs114499818_A	12246.4	12248.3	0.737376	0.0838889	0.655864	0.547354	0.967628	0.551186	0.659159	0.704422
6	rs2256902	0	30048351	A	G	1394	rs2256902_A	12247.5	12249.4	0.744828	0.0830955	0.659518	0.552027	0.961861	0.546824	0.664034	0.710417
6	rs115810639	0	30048467	A	G	1395	rs115810639_A	12156.1	12157.9	0.680188	0.648324	0.299588	0.717709	0.245922	0.91494	0.652842	0.390077
6	rs5009448	0	30048467	A	G	1396	rs5009448_A	12248.3	12250.2	0.761643	0.717786	0.349403	0.797669	0.292111	0.996447	0.729557	0.454351
6	rs115500464	0	30048483	A	C	1397	rs115500464_A	12230.6	12231.9	0.388377	0.492636	0.382235	0.424925	0.26285	0.168375	0.210525	0.222036
6	rs114204022	0	30048658	A	G	1398	rs114204022_A	12247.8	12249.1	0.387485	0.0108008	0.859986	0.0852059	0.468984	0.244873	0.163034	0.182206
6	rs116535843	0	30048676	C	G	1399	rs116535843_C	12248.3	12249.8	0.458784	0.547137	0.457732	0.49784	0.322029	0.208723	0.253408	0.267693
6	rs115538144	0	30048729	C	A	1400	rs115538144_C	12247.8	12249.8	0.96313	0.527293	0.608316	0.951071	0.495108	0.878493	0.96729	0.585975
6	rs2256919	0	30048729	C	A	1401	rs2256919_C	12248.3	12250.3	0.813454	0.650177	0.479801	0.893577	0.387164	0.736201	0.815083	0.463763
6	rs115509554	0	30048793	A	G	1402	rs115509554_A	12248.3	12250	0.587234	0.0283827	0.639709	0.17537	0.6869	0.416356	0.31089	0.304732
6	rs115592739	0	30048922	G	A	1403	rs115592739_G	12248.3	12249.7	0.427074	0.0920756	0.772616	0.138177	0.182183	0.241871	0.205628	0.0659451
6	rs116454582	0	30048990	A	G	1404	rs116454582_A	12245.2	12246.5	0.412456	0.354894	0.749406	0.743665	0.532988	0.497199	0.628891	0.768483
6	rs116354912	0	30049043	G	A	1405	rs116354912_G	12245.2	12247.1	0.792294	0.917509	0.883818	0.983753	0.533659	0.64284	0.837935	0.693717
6	rs114886428	0	30049163	A	G	1406	rs114886428_A	12237.2	12238.7	0.474771	0.0169569	0.776695	0.122282	0.56155	0.324326	0.225746	0.224239
6	rs116159284	0	30049410	A	G	1407	rs116159284_A	12246.9	12247.8	0.298791	0.0611592	0.586187	0.0860913	0.097023	0.122976	0.107081	0.0289427
6	rs9295825	0	30049410	A	G	1408	rs9295825_A	12224.1	12225	0.293289	0.0587468	0.57471	0.0838216	0.0957379	0.120408	0.10356	0.0284725
6	rs2523948	0	30049836	C	A	1409	rs2523948_C	12192.3	12194.1	0.675555	0.733213	0.387414	0.767753	0.298311	0.607867	0.70069	0.377043
6	rs112130743	0	30049852	A	C	1410	rs112130743_A	12244.2	12246.1	0.797214	0.194754	0.488599	0.610865	0.460706	0.903181	0.531329	0.595441
6	rs116097111	0	30049922	A	G	1411	rs116097111_A	12240.6	12241.6	0.318765	0.0106568	0.38211	0.0694164	0.0603713	0.206169	0.0864506	0.0301331
6	rs2523946	0	30049922	A	G	1412	rs2523946_A	12243.7	12244.7	0.328003	0.0112561	0.392124	0.072839	0.0630631	0.215273	0.091247	0.0320234
6	rs114764570	0	30050012	G	C	1413	rs114764570_G	12247.7	12248.9	0.383475	0.083616	0.701683	0.11941	0.152377	0.208732	0.17812	0.0550306
6	rs3823355	0	30050062	A	G	1414	rs3823355_A	12247.6	12248.8	0.377074	0.0829682	0.691026	0.117684	0.15037	0.206269	0.175559	0.053667
6	rs116653299	0	30050105	C	A	1415	rs116653299_C	12244.7	12245.7	0.300986	0.00947319	0.361275	0.063704	0.0556442	0.195108	0.079598	0.0276188
6	rs2844804	0	30050105	C	A	1416	rs2844804_C	12247.1	12248.2	0.352542	0.0127599	0.41585	0.0795516	0.0703405	0.232703	0.0980808	0.0349172
6	rs114282430	0	30050170	A	C	1417	rs114282430_A	12247.5	12249.5	0.911211	0.930083	0.252515	0.925617	0.213671	0.938999	0.614045	0.377381
6	rs116436488	0	30050184	A	G	1418	rs116436488_A	12248.3	12249.6	0.399726	0.0900338	0.723242	0.127519	0.161377	0.220397	0.189476	0.0591874
6	rs116160663	0	30050821	A	C	1419	rs116160663_A	12247.8	12249.2	0.434222	0.0990802	0.76576	0.141102	0.178734	0.241298	0.206303	0.0662027
6	rs2232238	0	30050836	G	A	1420	rs2232238_G	12248.3	12250.2	0.734129	0.173006	0.439995	0.557382	0.415558	0.840338	0.482487	0.543947
6	rs114492165	0	30050845	G	A	1421	rs114492165_G	12248.3	12248.9	0.23078	0.209807	0.492004	0.321913	0.327569	0.26394	0.526822	0.336083
6	rs115066129	0	30050906	C	A	1422	rs115066129_C	12247.9	12249.8	0.672182	0.583162	0.880486	0.788298	0.820862	0.750645	0.886164	0.865131
6	rs2523943	0	30050906	C	A	1423	rs2523943_C	12247.8	12249.7	0.672967	0.581548	0.880308	0.790039	0.82067	0.750847	0.88749	0.866415
6	rs114605621	0	30050958	G	C	1424	rs114605621_G	12248.3	12248.9	0.23078	0.209807	0.492004	0.321913	0.327569	0.26394	0.526822	0.336083
6	rs400488	0	30051014	A	G	1425	rs400488_A	12247.4	12249.2	0.733513	0.171173	0.440307	0.554579	0.414307	0.838901	0.480462	0.541611
6	rs115895139	0	30051157	G	A	1426	rs115895139_G	12246.9	12248.2	0.404352	0.0910635	0.727007	0.129079	0.163242	0.223078	0.190591	0.0597007
6	rs114200354	0	30051248	A	G	1427	rs114200354_A	12241.9	12243.8	0.74526	0.174347	0.454298	0.571988	0.422578	0.847452	0.495594	0.559654
6	rs116836924	0	30051260	A	G	1428	rs116836924_A	12241.7	12243.2	0.465279	0.110556	0.805341	0.156047	0.195711	0.261569	0.225709	0.0744258
6	rs114857993	0	30051317	A	G	1429	rs114857993_A	12248.3	12249.8	0.489131	0.976069	0.273893	0.63786	0.194368	0.578429	0.405021	0.451286
6	rs112672605	0	30051334	A	G	1430	rs112672605_A	12244.1	12245.3	0.356143	0.202484	0.460391	0.252523	0.562576	0.808801	0.364759	0.426271
6	rs2735076	0	30051469	A	G	1431	rs2735076_A	12244.5	12246.1	0.516539	0.994159	0.20845	0.601654	0.0813345	0.326235	0.265037	0.269881
6	rs115638442	0	30051560	A	C	1432	rs115638442_A	12245.4	12246	0.227904	0.207354	0.487534	0.318736	0.323884	0.26051	0.52221	0.332423
6	rs114500036	0	30051635	A	C	1433	rs114500036_A	12241.7	12241.5	0.130435	0.0111036	0.369007	0.0361712	0.0300307	0.0597965	0.0401319	0.0278958
6	rs2394251	0	30051667	G	C	1434	rs2394251_G	12218.2	12219.8	0.52351	0.424403	0.700306	0.504968	0.778923	0.468563	0.701112	0.940261
6	rs3823363	0	30051694	A	G	1435	rs3823363_A	12244.7	12244.8	0.165867	0.0218183	0.884297	0.0506422	0.475965	0.129719	0.160946	0.11892
6	rs2893999	0	30051811	G	A	1436	rs2893999_G	12248.3	12249.6	0.399494	0.343226	0.732978	0.729144	0.519534	0.48475	0.615784	0.783075
6	rs2245961	0	30051983	C	A	1437	rs2245961_C	12247.4	12249.3	0.828456	0.305883	0.626508	0.799566	0.557098	0.972446	0.921861	0.638965
6	rs3823374	0	30052127	A	C	1438	rs3823374_A	12248.3	12250	0.552795	0.13767	0.762321	0.169546	0.13108	0.205167	0.208239	0.0571249
6	rs3823375	0	30052137	G	A	1439	rs3823375_G	12248.3	12249.8	0.476115	0.106598	0.667163	0.132531	0.0968458	0.152963	0.153398	0.0378082
6	rs114764471	0	30052163	A	G	1440	rs114764471_A	12248	12249.9	0.778839	0.633481	0.273162	0.532041	0.763228	0.659873	0.796358	0.422388
6	rs115652293	0	30052232	A	C	1441	rs115652293_A	12245.2	12246.9	0.568396	0.142589	0.781151	0.177707	0.136199	0.211809	0.217472	0.0604762
6	rs114341347	0	30052293	A	G	1442	rs114341347_A	12238.6	12240.3	0.575869	0.0372447	0.513199	0.141767	0.125922	0.395829	0.131267	0.069217
6	rs114076256	0	30053189	T	A	1443	rs114076256_T	12242	12242.6	0.242668	0.227548	0.510861	0.338113	0.341494	0.274284	0.544158	0.35197
6	rs3823382	0	30053189	T	A	1444	rs3823382_T	12244	12244.6	0.226456	0.216011	0.506477	0.324966	0.33714	0.277903	0.534977	0.347126
6	rs115400432	0	30053249	G	A	1445	rs115400432_G	12248.3	12249.9	0.522464	0.0245736	0.614859	0.46931	0.947369	0.687475	0.604855	0.713766
6	rs2571375	0	30053249	G	A	1446	rs2571375_G	12212.7	12214.3	0.532212	0.0264148	0.623844	0.476871	0.961022	0.673565	0.622033	0.733528
6	rs114752578	0	30053347	G	A	1447	rs114752578_G	12248.3	12249	0.243716	0.222355	0.514661	0.336142	0.346024	0.280171	0.547896	0.352792
6	rs3823384	0	30053347	G	A	1448	rs3823384_G	12248.3	12249	0.243716	0.222355	0.514661	0.336142	0.346024	0.280171	0.547896	0.352792
6	rs115313850	0	30053363	G	C	1449	rs115313850_G	12248.3	12248.3	0.151736	0.0832012	0.213585	0.0968643	0.232112	0.339005	0.0966414	0.129086
6	rs116760485	0	30053487	A	G	1450	rs116760485_A	12246.9	12247.4	0.218989	0.199926	0.476392	0.305869	0.314791	0.253956	0.506995	0.322646
6	rs9260860	0	30053487	A	G	1451	rs9260860_A	12248.3	12248.8	0.220142	0.200654	0.478356	0.307357	0.316148	0.254956	0.509245	0.323669
6	rs114137304	0	30053573	A	G	1452	rs114137304_A	12230.2	12230.5	0.180778	0.164801	0.407474	0.255354	0.263605	0.204417	0.434506	0.268181
6	rs2246198	0	30053581	A	G	1453	rs2246198_A	12248.3	12248.9	0.234906	0.855602	0.412409	0.317284	0.137056	0.0469991	0.259071	0.194227
6	rs115010417	0	30053599	A	G	1454	rs115010417_A	12213.5	12215.3	0.678026	0.403142	0.718497	0.724983	0.345189	0.149707	0.439736	0.460013
6	rs2246199	0	30053599	A	G	1455	rs2246199_A	12248.3	12250.1	0.675867	0.411472	0.720928	0.729222	0.347783	0.152635	0.445885	0.46978
6	rs115835372	0	30053720	A	G	1456	rs115835372_A	12248.3	12249	0.245342	0.22088	0.518814	0.337353	0.346472	0.280633	0.548336	0.354435
6	rs116165079	0	30053750	A	C	1457	rs116165079_A	12248.3	12249	0.245342	0.22088	0.518814	0.337353	0.346472	0.280633	0.548336	0.354435
6	rs9260863	0	30053750	A	C	1458	rs9260863_A	12248.3	12249	0.250609	0.225831	0.52663	0.342647	0.352893	0.285604	0.554978	0.359429
6	rs115341126	0	30053820	A	G	1459	rs115341126_A	12243	12243.5	0.224001	0.207228	0.487825	0.314607	0.321742	0.259734	0.517561	0.328625
6	rs9260864	0	30053820	A	G	1460	rs9260864_A	12248.3	12248.8	0.220142	0.200654	0.478356	0.307357	0.316148	0.254956	0.509245	0.323669
6	rs114826715	0	30053928	A	G	1461	rs114826715_A	12234.8	12233.6	0.0728203	9.82199e-08	0.985286	0.000550443	0.282304	0.0361186	0.0107085	0.0432893
6	rs3132685	0	30053928	A	G	1462	rs3132685_A	12241	12239.4	0.0571023	5.47074e-08	0.928655	0.000396763	0.237304	0.027508	0.00806503	0.034889
6	rs115561999	0	30053998	A	G	1463	rs115561999_A	12234.1	12234.7	0.226751	0.217978	0.482117	0.316482	0.327042	0.263357	0.519588	0.332511
6	rs114297328	0	30054432	A	G	1464	rs114297328_A	12228	12228.9	0.279332	0.253417	0.567323	0.378834	0.389126	0.318668	0.60086	0.396302
6	rs115866314	0	30054635	G	A	1465	rs115866314_G	12248.3	12248.8	0.220142	0.200654	0.478356	0.307357	0.316148	0.254956	0.509245	0.323669
6	rs2108691	0	30056344	A	C	1466	rs2108691_A	12245.7	12247.6	0.767214	0.122723	0.80518	0.626194	0.774993	0.399036	0.899812	0.938297
6	rs116661662	0	30056380	A	G	1467	rs116661662_A	12248.3	12248.8	0.220142	0.200654	0.478356	0.307357	0.316148	0.254956	0.509245	0.323669
6	rs115335559	0	30056536	A	G	1468	rs115335559_A	12248.3	12248.7	0.199085	0.180525	0.439038	0.276803	0.285473	0.228914	0.466578	0.291749
6	rs115974659	0	30056730	A	G	1469	rs115974659_A	12248.3	12250.1	0.658192	0.672661	0.580374	0.703583	0.300225	0.534697	0.927952	0.812046
6	rs9260918	0	30056730	A	G	1470	rs9260918_A	12248.3	12250.1	0.658192	0.672661	0.580374	0.703583	0.300225	0.534697	0.927952	0.812046
6	rs116764498	0	30056791	A	T	1471	rs116764498_A	12248.3	12249.4	0.33474	0.00597078	0.978714	0.0771202	0.233018	0.136926	0.164261	0.141047
6	rs2844802	0	30056791	A	T	1472	rs2844802_A	12244.3	12245.4	0.348287	0.00645399	0.999551	0.081309	0.243659	0.143414	0.172386	0.148082
6	rs116196668	0	30056863	A	G	1473	rs116196668_A	12248.3	12248.8	0.223801	0.204419	0.487779	0.312773	0.323462	0.261905	0.518107	0.330118
6	rs114324757	0	30056920	A	G	1474	rs114324757_A	12248.3	12249.7	0.434155	0.374338	0.780796	0.771919	0.558688	0.522444	0.656651	0.739244
6	rs114877310	0	30057009	C	G	1475	rs114877310_C	12248.3	12250.2	0.746468	0.116471	0.784808	0.607679	0.794464	0.412327	0.878583	0.915773
6	rs423808	0	30057102	A	C	1476	rs423808_A	12212.2	12214.1	0.821776	0.310677	0.776736	0.977556	0.415744	0.166408	0.698294	0.658761
6	rs410909	0	30057147	A	C	1477	rs410909_A	12248.3	12250.2	0.746468	0.116471	0.784808	0.607679	0.794464	0.412327	0.878583	0.915773
6	rs115888293	0	30057321	G	A	1478	rs115888293_G	12248.3	12250.3	0.992861	0.406021	0.332067	0.644281	0.422489	0.461508	0.40221	0.467997
6	rs2246638	0	30057476	A	G	1479	rs2246638_A	12248.3	12250.2	0.693319	0.505755	0.879794	0.909747	0.433077	0.175653	0.818207	0.650574
6	rs114138639	0	30057497	A	G	1480	rs114138639_A	12247.7	12249.6	0.729624	0.111827	0.766521	0.591861	0.810098	0.422864	0.861514	0.899942
6	rs2246642	0	30057497	A	G	1481	rs2246642_A	12248.3	12250.2	0.746468	0.116471	0.784808	0.607679	0.794464	0.412327	0.878583	0.915773
6	rs114695814	0	30057768	A	G	1482	rs114695814_A	12248.3	12246.1	0.0406736	0.000755682	0.0441661	0.0713963	0.0932041	0.107676	0.0268209	0.0368094
6	rs2394255	0	30057800	G	A	1483	rs2394255_G	12247.4	12247.8	0.204275	0.0439904	0.928618	0.0933381	0.163375	0.0297101	0.180115	0.128898
6	rs115844415	0	30058189	G	A	1484	rs115844415_G	12248.3	12249.4	0.326341	0.00553775	0.970052	0.0741508	0.228383	0.13365	0.160146	0.137443
6	rs401618	0	30058189	G	A	1485	rs401618_G	12248.3	12249.4	0.330072	0.00569433	0.97483	0.0754208	0.230701	0.135366	0.162188	0.139203
6	rs115233419	0	30058562	G	A	1486	rs115233419_G	12248.3	12250.1	0.617756	0.559048	0.506763	0.784671	0.326521	0.140781	0.434274	0.390095
6	rs116553443	0	30058647	A	G	1487	rs116553443_A	12248.3	12250.3	0.862684	0.970031	0.834405	0.950953	0.472714	0.607439	0.769649	0.648109
6	rs114950038	0	30058812	C	G	1488	rs114950038_C	12241.5	12242	0.223238	0.0527027	0.968003	0.104123	0.184239	0.035092	0.197743	0.142718
6	rs115775300	0	30058818	G	C	1489	rs115775300_G	12239.8	12240.9	0.34945	0.124193	0.295488	0.339184	0.523611	0.702782	0.320893	0.312309
6	rs114160221	0	30058958	C	A	1490	rs114160221_C	12247.2	12248.2	0.327715	0.114491	0.275609	0.317309	0.497606	0.670847	0.299552	0.291406
6	rs2517808	0	30058990	A	G	1491	rs2517808_A	12248.3	12245.7	0.0318951	0.342438	0.0301496	0.0390937	0.0119685	0.00281625	0.00586925	0.00726921
6	rs115251642	0	30059085	G	A	1492	rs115251642_G	12248.3	12249.4	0.349637	0.0063707	0.997162	0.0818525	0.245669	0.144804	0.174091	0.149598
6	rs2735067	0	30059085	G	A	1493	rs2735067_G	12248.3	12249.4	0.349637	0.0063707	0.997162	0.0818525	0.245669	0.144804	0.174091	0.149598
6	rs116578749	0	30059183	A	G	1494	rs116578749_A	12248.3	12249.3	0.306913	0.106103	0.258023	0.299266	0.472623	0.644071	0.282063	0.273754
6	rs115658280	0	30059273	A	C	1495	rs115658280_A	12229.8	12230.8	0.314672	0.105792	0.264259	0.303006	0.478494	0.650905	0.286539	0.280346
6	rs115400074	0	30059761	G	A	1496	rs115400074_G	12175	12175.5	0.224371	0.196973	0.483324	0.307844	0.325922	0.261487	0.510515	0.324846
6	rs114757350	0	30060141	G	A	1497	rs114757350_G	12244.2	12245.3	0.350287	0.127412	0.29674	0.341188	0.526386	0.704691	0.322466	0.313728
6	rs11757750	0	30060141	G	A	1498	rs11757750_G	12248.3	12249.4	0.334734	0.117089	0.282608	0.325188	0.506697	0.682527	0.306355	0.298014
6	rs116163566	0	30060793	G	A	1499	rs116163566_G	12240.4	12241.4	0.31959	0.113218	0.271822	0.312869	0.493459	0.661418	0.298522	0.288686
6	rs115071807	0	30060899	A	G	1500	rs115071807_A	12224.1	12224.9	0.272085	0.094345	0.226997	0.264339	0.42985	0.592401	0.247781	0.241591
6	rs115946370	0	30060903	T	A	1501	rs115946370_T	12247.8	12249.8	0.961453	0.377984	0.317643	0.622993	0.408239	0.445146	0.386711	0.452225
6	rs114451194	0	30060910	A	G	1502	rs114451194_A	12194.6	12195.6	0.318524	0.116662	0.274724	0.31215	0.499249	0.66768	0.295784	0.290078
6	rs114993291	0	30061014	A	G	1503	rs114993291_A	12242	12243.2	0.357928	0.123101	0.30334	0.345651	0.53429	0.706659	0.324116	0.315096
6	rs115788285	0	30061078	A	G	1504	rs115788285_A	12243.2	12244	0.287749	0.0883684	0.240575	0.278057	0.445387	0.611381	0.257628	0.249103
6	rs11755961	0	30061078	A	G	1505	rs11755961_A	12248	12248.9	0.298095	0.0989925	0.252879	0.291176	0.461064	0.627484	0.270709	0.262891
6	rs114633038	0	30061249	G	C	1506	rs114633038_G	12246.6	12247.8	0.388647	0.144954	0.327947	0.376737	0.575997	0.761254	0.353205	0.344615
6	rs2735065	0	30061568	A	C	1507	rs2735065_A	12248.3	12248.5	0.171633	0.970376	0.116135	0.186477	0.0782272	0.032949	0.05286	0.0441448
6	rs114860141	0	30061607	A	G	1508	rs114860141_A	12227	12228.1	0.35887	0.130694	0.303752	0.350061	0.535996	0.719255	0.330204	0.321175
6	rs116251601	0	30061695	G	A	1509	rs116251601_G	12235.6	12236.6	0.320827	0.115748	0.277862	0.31311	0.496784	0.661414	0.300422	0.292871
6	rs5875226	0	30061964	I	D	1510	rs5875226_I	12248.3	12249.3	0.306913	0.106103	0.258023	0.299266	0.472623	0.644071	0.282063	0.273754
6	rs114268881	0	30062090	G	A	1511	rs114268881_G	12237.4	12238.7	0.377027	0.135512	0.32021	0.366392	0.557147	0.739318	0.346665	0.336801
6	rs114827979	0	30062178	A	G	1512	rs114827979_A	12223.4	12224.3	0.303352	0.100847	0.254453	0.29197	0.465915	0.633739	0.276027	0.269025
6	rs114537098	0	30062259	G	A	1513	rs114537098_G	12236.5	12237.6	0.335134	0.11334	0.281041	0.32433	0.507401	0.68332	0.306698	0.296942
6	rs4947244	0	30062343	G	C	1514	rs4947244_G	12247.7	12248.7	0.322617	0.0642812	0.606408	0.0931739	0.109306	0.135906	0.11253	0.0309379
6	rs114421444	0	30062596	G	A	1515	rs114421444_G	12241.6	12242.5	0.295572	0.100742	0.251999	0.290325	0.457986	0.62645	0.275292	0.265471
6	rs114431800	0	30062621	A	G	1516	rs114431800_A	12244	12244.9	0.29094	0.0930809	0.242732	0.280003	0.443972	0.615505	0.264235	0.256395
6	rs116013920	0	30062763	G	A	1517	rs116013920_G	12227.6	12229.2	0.532132	0.228305	0.44742	0.497239	0.725123	0.93005	0.467722	0.463404
6	rs114988554	0	30062830	G	A	1518	rs114988554_G	12248.3	12249.3	0.306913	0.106103	0.258023	0.299266	0.472623	0.644071	0.282063	0.273754
6	rs114513728	0	30063004	G	A	1519	rs114513728_G	12248.3	12249	0.251853	0.230188	0.531264	0.34643	0.360763	0.294271	0.562849	0.365899
6	rs3901554	0	30063004	G	A	1520	rs3901554_G	12247.8	12248.6	0.268418	0.247584	0.563619	0.366581	0.381253	0.314032	0.591876	0.388933
6	rs114912266	0	30063067	A	C	1521	rs114912266_A	12248.3	12249.3	0.306913	0.106103	0.258023	0.299266	0.472623	0.644071	0.282063	0.273754
6	rs5025708	0	30063178	C	A	1522	rs5025708_C	12248.3	12249.9	0.525168	0.302198	0.0425717	0.533316	0.0173247	0.441767	0.187097	0.24259
6	rs115915736	0	30063201	C	A	1523	rs115915736_C	12247.8	12248.8	0.307645	0.106636	0.258588	0.300043	0.473308	0.645039	0.282996	0.274616
6	rs116264267	0	30063367	G	A	1524	rs116264267_G	12248.3	12249.3	0.306913	0.106103	0.258023	0.299266	0.472623	0.644071	0.282063	0.273754
6	rs114024731	0	30063410	A	G	1525	rs114024731_A	12248.3	12249.2	0.298454	0.101263	0.250977	0.2912	0.461932	0.630548	0.27433	0.265256
6	rs116306180	0	30063483	A	T	1526	rs116306180_A	12064.4	12064.8	0.209494	0.347608	0.216297	0.214101	0.20903	0.160041	0.219861	0.228713
6	rs116477860	0	30063999	G	A	1527	rs116477860_G	12218	12218.9	0.304075	0.104394	0.255041	0.296225	0.466181	0.635582	0.27844	0.270246
6	rs115256891	0	30064028	A	G	1528	rs115256891_A	12198.7	12199.7	0.332269	0.118648	0.287601	0.327523	0.506243	0.682174	0.313391	0.303546
6	rs116562537	0	30064629	A	C	1529	rs116562537_A	12218.9	12219.9	0.307253	0.10479	0.257168	0.296128	0.470947	0.636569	0.280597	0.271403
6	rs114537101	0	30064932	G	A	1530	rs114537101_G	12233.9	12234.6	0.244622	0.2231	0.520766	0.339672	0.355578	0.292642	0.553515	0.357727
6	rs9260930	0	30064932	G	A	1531	rs9260930_G	12248.3	12249	0.251853	0.230188	0.531264	0.34643	0.360763	0.294271	0.562849	0.365899
6	rs115216911	0	30065048	G	A	1532	rs115216911_G	12220.8	12221.8	0.316635	0.0629508	0.59366	0.0898967	0.106149	0.130711	0.108326	0.0284643
6	rs114977730	0	30065057	G	A	1533	rs114977730_G	12230.3	12230.7	0.209156	0.0492863	0.938284	0.0955322	0.167098	0.0309664	0.182586	0.130662
6	rs114481163	0	30065264	C	A	1534	rs114481163_C	12220.7	12221.8	0.328234	0.118369	0.279967	0.319185	0.499489	0.676637	0.29712	0.291302
6	rs115279586	0	30065487	C	A	1535	rs115279586_C	12248.3	12249.2	0.279469	0.252436	0.573859	0.378731	0.393639	0.322478	0.603808	0.399042
6	rs116634325	0	30065781	G	A	1536	rs116634325_G	12209.4	12210.1	0.260004	0.234726	0.557978	0.361726	0.378169	0.311872	0.583049	0.383479
6	rs9260932	0	30065781	G	A	1537	rs9260932_G	12248.3	12249.2	0.279469	0.252436	0.573859	0.378731	0.393639	0.322478	0.603808	0.399042
6	rs9260934	0	30065961	A	G	1538	rs9260934_A	12247.7	12248.4	0.251267	0.229726	0.529986	0.345747	0.359927	0.293654	0.561721	0.365229
6	rs114423935	0	30067725	G	A	1539	rs114423935_G	12211.3	12211.8	0.221926	0.197887	0.487661	0.305959	0.331748	0.267369	0.506583	0.320513
6	rs116329233	0	30067914	C	G	1540	rs116329233_C	12247.7	12248.1	0.210118	0.19011	0.468423	0.293674	0.314268	0.252589	0.492793	0.312186
6	rs7749944	0	30067979	C	A	1541	rs7749944_C	12240.2	12237.7	0.0323767	0.0139273	0.0515888	0.0215992	0.0472028	0.0288979	0.0160624	0.033782
6	rs7749944	0	30067979	C	A	1542	rs7749944_C.1	12248.3	12245.8	0.0331452	0.0143278	0.0526719	0.0220988	0.0481997	0.029588	0.0164852	0.034501
6	rs114862917	0	30068310	A	C	1543	rs114862917_A	12246.3	12247.8	0.476756	0.530578	0.137028	0.591099	0.00716337	0.0297666	0.421583	0.453499
6	rs16896853	0	30068310	A	C	1544	rs16896853_A	12238.2	12239.8	0.534257	0.579273	0.163223	0.659262	0.00966359	0.0385735	0.484144	0.522723
6	rs116202746	0	30068480	A	G	1545	rs116202746_A	12118.4	12109	0.000761057	0.00151363	0.000779347	0.000872189	0.000552573	0.000281881	0.000965578	0.00109814
6	rs115016730	0	30068849	A	T	1546	rs115016730_A	12248.3	12250.3	0.889537	0.785538	0.755956	0.984356	0.844131	0.626387	0.763777	0.929163
6	rs114599368	0	30068937	C	G	1547	rs114599368_C	12239.7	12241.7	0.887242	0.790505	0.759801	0.988232	0.842763	0.627985	0.769521	0.936832
6	rs116513743	0	30068978	A	C	1548	rs116513743_A	12245.6	12247.6	0.885642	0.787838	0.756188	0.988979	0.841083	0.626	0.766747	0.93156
6	rs116535071	0	30069185	A	G	1549	rs116535071_A	12248.3	12250.3	0.964557	0.649236	0.975486	0.985266	0.99988	0.893482	0.930331	0.984331
6	rs114187835	0	30069253	G	A	1550	rs114187835_G	12247.8	12246.3	0.0614506	1.65558e-05	0.841223	0.00503407	0.148652	0.0625606	0.0357353	0.068883
6	rs116414439	0	30069260	A	G	1551	rs116414439_A	12248.3	12250.3	0.889537	0.785538	0.755956	0.984356	0.844131	0.626387	0.763777	0.929163
6	rs115742376	0	30069346	A	G	1552	rs115742376_A	12248.3	12250.3	0.895637	0.785928	0.75136	0.980268	0.845898	0.628044	0.760934	0.926394
6	rs114096489	0	30069418	A	C	1553	rs114096489_A	12248.3	12250.3	0.896676	0.775309	0.749615	0.976178	0.852876	0.633554	0.755552	0.921004
6	rs114451271	0	30069610	A	G	1554	rs114451271_A	12248.3	12250.1	0.658125	0.512024	0.534213	0.824549	0.346797	0.152232	0.462777	0.415591
6	rs115455095	0	30069701	A	G	1555	rs115455095_A	12248.3	12250.3	0.889537	0.785538	0.755956	0.984356	0.844131	0.626387	0.763777	0.929163
6	rs114774383	0	30069832	A	G	1556	rs114774383_A	12248.3	12250.3	0.924268	0.756773	0.723204	0.951139	0.876784	0.655445	0.733049	0.896417
6	rs116399269	0	30070247	A	G	1557	rs116399269_A	12248.3	12248.7	0.203669	0.184274	0.459585	0.286765	0.306951	0.245743	0.483942	0.304334
6	rs9260984	0	30070247	A	G	1558	rs9260984_A	12248.3	12248.7	0.203669	0.184274	0.459585	0.286765	0.306951	0.245743	0.483942	0.304334
6	rs115094340	0	30070494	G	A	1559	rs115094340_G	12247.7	12249.7	0.956242	0.729157	0.696276	0.921537	0.906992	0.682153	0.703834	0.866351
6	rs9260988	0	30070494	G	A	1560	rs9260988_G	12248.3	12250.3	0.958719	0.726863	0.694054	0.919215	0.909304	0.684642	0.701811	0.863987
6	rs115896331	0	30070720	A	G	1561	rs115896331_A	12245.6	12247.2	0.564541	0.785708	0.291374	0.853165	0.0215878	0.0695469	0.751647	0.805794
6	rs114465658	0	30070775	C	G	1562	rs114465658_C	12247.4	12249.3	0.889325	0.78877	0.755675	0.985225	0.847942	0.629291	0.76275	0.931199
6	rs115157072	0	30071044	A	G	1563	rs115157072_A	12123.9	12122.2	0.0561433	0.00769926	0.415762	0.0189414	0.0338082	0.00438198	0.0397422	0.0250954
6	rs6457121	0	30071044	A	G	1564	rs6457121_A	12094.4	12094	0.118599	0.0203832	0.641161	0.04528	0.0710506	0.0103561	0.0868955	0.0577987
6	rs116173729	0	30071158	G	A	1565	rs116173729_G	12247.8	12249.8	0.808958	0.881104	0.82913	0.929914	0.779427	0.572455	0.847423	0.992782
6	rs6910898	0	30071158	G	A	1566	rs6910898_G	12248.3	12250.3	0.810817	0.878357	0.827563	0.931994	0.780696	0.573795	0.845237	0.994704
6	rs114069585	0	30071703	A	C	1567	rs114069585_A	12248.3	12249.4	0.327322	0.11284	0.276486	0.317968	0.497281	0.672763	0.299692	0.291009
6	rs115709770	0	30072446	G	A	1568	rs115709770_G	12245.8	12246	0.181456	0.339171	0.38071	0.238881	0.165581	0.0933947	0.378666	0.275545
6	rs115497931	0	30072784	A	G	1569	rs115497931_A	12248.3	12249.7	0.413921	0.290256	0.628828	0.453683	0.481547	0.431112	0.632967	0.426747
6	rs114302546	0	30073285	A	G	1570	rs114302546_A	12248.3	12250.3	0.92386	0.756191	0.724906	0.953053	0.876391	0.653393	0.732206	0.895674
6	rs114934460	0	30073323	G	A	1571	rs114934460_G	12248	12250	0.911861	0.766879	0.736053	0.965252	0.864574	0.641997	0.745461	0.909336
6	rs6911279	0	30073323	G	A	1572	rs6911279_G	12248.3	12250.3	0.912783	0.765236	0.735087	0.964258	0.865547	0.642719	0.744243	0.908187
6	rs114436708	0	30073480	A	C	1573	rs114436708_A	12247.6	12249.5	0.770377	0.502998	0.453617	0.674132	0.765569	0.940808	0.387429	0.52927
6	rs6911737	0	30073480	A	C	1574	rs6911737_A	12247.6	12249.5	0.770377	0.502998	0.453617	0.674132	0.765569	0.940808	0.387429	0.52927
6	rs116568351	0	30073542	A	C	1575	rs116568351_A	12248	12250	0.914384	0.76879	0.733723	0.961464	0.866103	0.643475	0.74005	0.903959
6	rs116046402	0	30073650	A	G	1576	rs116046402_A	12248.3	12250.3	0.92386	0.756191	0.724906	0.953053	0.876391	0.653393	0.732206	0.895674
6	rs115610346	0	30073760	A	G	1577	rs115610346_A	12213	12215	0.994208	0.668293	0.665013	0.871967	0.943158	0.712612	0.662207	0.817024
6	rs9261026	0	30073952	A	G	1578	rs9261026_A	12248.3	12250.3	0.92386	0.756191	0.724906	0.953053	0.876391	0.653393	0.732206	0.895674
6	rs9261035	0	30074154	A	G	1579	rs9261035_A	12248.3	12248.8	0.22129	0.19696	0.487936	0.306338	0.328534	0.262952	0.513314	0.326604
6	rs116021206	0	30074280	A	G	1580	rs116021206_A	12247.5	12248.2	0.240302	0.216468	0.528312	0.330573	0.355326	0.288407	0.549761	0.354644
6	rs114673490	0	30074444	G	A	1581	rs114673490_G	12248.3	12249	0.246639	0.216961	0.528898	0.336334	0.359667	0.289223	0.552643	0.357611
6	rs114318558	0	30074766	A	G	1582	rs114318558_A	12206.1	12203.4	0.029417	5.99588e-06	0.580913	0.00236058	0.071392	0.026953	0.016843	0.0347435
6	rs115577179	0	30074829	G	A	1583	rs115577179_G	12248.3	12250.3	0.92386	0.756191	0.724906	0.953053	0.876391	0.653393	0.732206	0.895674
6	rs114705877	0	30074875	A	G	1584	rs114705877_A	12248.3	12250.3	0.991163	0.88416	0.690194	0.843766	0.964311	0.733586	0.954518	0.989862
6	rs116540128	0	30074983	C	G	1585	rs116540128_C	12244.3	12244.6	0.187295	0.170241	0.429272	0.263107	0.284255	0.227095	0.45401	0.284376
6	rs114010067	0	30075168	A	G	1586	rs114010067_A	12222.4	12224.3	0.749841	0.817867	0.960071	0.922845	0.578727	0.717257	0.902931	0.776858
6	rs115911233	0	30075465	G	A	1587	rs115911233_G	12248.3	12248.8	0.22129	0.19696	0.487936	0.306338	0.328534	0.262952	0.513314	0.326604
6	rs114547438	0	30075508	A	G	1588	rs114547438_A	12247.8	12248.4	0.232304	0.210626	0.502121	0.321352	0.343376	0.277022	0.532207	0.342261
6	rs6923856	0	30075508	A	G	1589	rs6923856_A	12246.9	12247.6	0.245304	0.222713	0.534725	0.337323	0.362468	0.2952	0.558213	0.361793
6	rs115585259	0	30075721	G	A	1590	rs115585259_G	12248.3	12248.9	0.240268	0.211462	0.515734	0.328117	0.350334	0.281929	0.54031	0.348851
6	rs116070960	0	30075778	G	C	1591	rs116070960_G	12143.7	12144.8	0.34745	0.325163	0.62404	0.438666	0.452425	0.403661	0.689573	0.472274
6	rs115569650	0	30075969	A	G	1592	rs115569650_A	12248.3	12249	0.246639	0.216961	0.528898	0.336334	0.359667	0.289223	0.552643	0.357611
6	rs114976079	0	30075978	G	A	1593	rs114976079_G	12240.7	12241.2	0.214312	0.20123	0.472733	0.292588	0.312132	0.254892	0.497077	0.318068
6	rs115736869	0	30076101	A	G	1594	rs115736869_A	12109.7	12111.1	0.44243	0.359942	0.782902	0.558654	0.557672	0.462952	0.849094	0.631501
6	rs115022796	0	30076254	A	G	1595	rs115022796_A	12248	12249.6	0.532456	0.666292	0.465712	0.723013	0.287952	0.122904	0.384189	0.34863
6	rs116020573	0	30076743	A	G	1596	rs116020573_A	12236.7	12237.4	0.237855	0.208363	0.517532	0.320832	0.352929	0.283242	0.535654	0.348132
6	rs116238785	0	30076944	A	G	1597	rs116238785_A	12244.9	12246.4	0.491204	0.200363	0.414365	0.465014	0.683777	0.876784	0.43807	0.4311
6	rs115586048	0	30076966	G	A	1598	rs115586048_G	12239.9	12240.6	0.258692	0.232542	0.553274	0.356728	0.380588	0.30098	0.580875	0.375187
6	rs116801296	0	30077019	G	A	1599	rs116801296_G	12248.3	12248.8	0.22129	0.19696	0.487936	0.306338	0.328534	0.262952	0.513314	0.326604
6	rs115430051	0	30077169	A	G	1600	rs115430051_A	12248.3	12249.4	0.327322	0.11284	0.276486	0.317968	0.497281	0.672763	0.299692	0.291009
6	rs115733967	0	30077492	G	A	1601	rs115733967_G	12226.4	12227.2	0.263739	0.232179	0.550784	0.355989	0.377096	0.304846	0.575263	0.373522
6	rs115286047	0	30077797	G	A	1602	rs115286047_G	12248	12248.6	0.228742	0.20449	0.506705	0.317246	0.343385	0.27703	0.530813	0.339542
6	rs114217878	0	30077908	A	G	1603	rs114217878_A	12248.3	12248.8	0.22129	0.19696	0.487936	0.306338	0.328534	0.262952	0.513314	0.326604
6	rs116725025	0	30077952	A	C	1604	rs116725025_A	12248.3	12248.8	0.22129	0.19696	0.487936	0.306338	0.328534	0.262952	0.513314	0.326604
6	rs9261091	0	30077952	A	C	1605	rs9261091_A	12248.3	12248.8	0.22129	0.19696	0.487936	0.306338	0.328534	0.262952	0.513314	0.326604
6	rs114467164	0	30078018	A	T	1606	rs114467164_A	12247.4	12249	0.569728	0.510295	0.151077	0.670075	0.0127424	0.0421242	0.474845	0.55107
6	rs11760176	0	30078406	A	G	1607	rs11760176_A	12248.3	12248.5	0.178662	0.0244089	0.162275	0.162416	0.328787	0.460717	0.137402	0.15596
6	rs116796832	0	30078568	C	A	1608	rs116796832_C	12225.8	12227.8	0.931892	0.625003	0.60101	0.824597	0.982409	0.785586	0.620958	0.778974
6	rs7758512	0	30078568	C	A	1609	rs7758512_C	12239.9	12241.9	0.966126	0.653764	0.633528	0.859632	0.984961	0.750271	0.65282	0.809838
6	rs114800379	0	30078664	G	A	1610	rs114800379_G	12248.3	12249.1	0.276054	0.250025	0.567152	0.361461	0.401247	0.324101	0.581018	0.380814
6	rs116837657	0	30078906	A	G	1611	rs116837657_A	12175.1	12177.1	0.836176	0.285039	0.768432	0.377	0.413625	0.479256	0.435331	0.177919
6	rs116413606	0	30078991	G	A	1612	rs116413606_G	12238.6	12240.1	0.478644	0.732526	0.414968	0.650963	0.254701	0.110353	0.334908	0.302539
6	rs6905157	0	30079527	G	A	1613	rs6905157_G	12243	12244.9	0.848664	0.845948	0.783438	0.978082	0.814955	0.59663	0.792243	0.959539
6	rs116725690	0	30079553	A	G	1614	rs116725690_A	12236.3	12237.5	0.371342	0.318377	0.692067	0.688387	0.487831	0.461555	0.576969	0.829083
6	rs115496981	0	30080753	C	G	1615	rs115496981_C	12203.8	12205.3	0.47218	0.211769	0.397386	0.434323	0.669417	0.853621	0.398812	0.388045
6	rs114559026	0	30080963	A	G	1616	rs114559026_A	12248	12249.2	0.368899	0.0117656	0.873427	0.1191	0.459827	0.26964	0.272909	0.270287
6	rs114095793	0	30081114	G	A	1617	rs114095793_G	12248.3	12250.3	0.958717	0.727783	0.692642	0.919932	0.909236	0.682931	0.701928	0.863126
6	rs114466399	0	30081166	A	T	1618	rs114466399_A	12248.3	12249.4	0.327322	0.11284	0.276486	0.317968	0.497281	0.672763	0.299692	0.291009
6	rs11965524	0	30081166	A	T	1619	rs11965524_A	12248.3	12250.3	0.92386	0.756191	0.724906	0.953053	0.876391	0.653393	0.732206	0.895674
6	rs116581332	0	30081371	G	A	1620	rs116581332_G	12187.2	12189.2	0.945349	0.755508	0.710332	0.943876	0.883751	0.662373	0.724306	0.882946
6	rs115092131	0	30081505	G	A	1621	rs115092131_G	12235.7	12237	0.394078	0.0827762	0.731151	0.127812	0.151078	0.187667	0.153704	0.0469021
6	rs115930371	0	30081599	G	A	1622	rs115930371_G	12248.3	12249.7	0.432837	0.378123	0.774959	0.768953	0.553869	0.5254	0.65156	0.73491
6	rs356967	0	30081889	A	G	1623	rs356967_A	12248.3	12249.6	0.403509	0.00898996	0.919375	0.101268	0.285535	0.173289	0.207884	0.179177
6	rs115814721	0	30081904	G	A	1624	rs115814721_G	12247.8	12249.8	0.820157	0.683468	0.444376	0.734771	0.196215	0.898061	0.847755	0.971739
6	rs4313034	0	30081904	G	A	1625	rs4313034_G	12216.5	12218.4	0.744303	0.622582	0.50359	0.6641	0.228749	0.963683	0.922277	0.954893
6	rs114523436	0	30082133	A	G	1626	rs114523436_A	12200.5	12201.7	0.395529	0.346975	0.743846	0.510059	0.53065	0.45032	0.768953	0.543576
6	rs114440360	0	30082479	G	A	1627	rs114440360_G	12247.7	12249.7	0.954251	0.732511	0.696417	0.923498	0.904923	0.678379	0.704556	0.8671
6	rs9261105	0	30082479	G	A	1628	rs9261105_G	12239.4	12241.3	0.840229	0.830538	0.815051	0.953451	0.792856	0.57719	0.822458	0.983022
6	rs116005752	0	30082654	A	G	1629	rs116005752_A	12248.3	12250.3	0.87954	0.987602	0.82156	0.938367	0.461904	0.592065	0.760416	0.635854
6	rs114404619	0	30083026	A	C	1630	rs114404619_A	12248.3	12249.6	0.390368	0.00861169	0.937276	0.0966687	0.275776	0.16676	0.200496	0.173134
6	rs356968	0	30083026	A	C	1631	rs356968_A	12248.3	12249.6	0.390368	0.00861169	0.937276	0.0966687	0.275776	0.16676	0.200496	0.173134
6	rs116389580	0	30083074	G	C	1632	rs116389580_G	12237.8	12238.4	0.241892	0.229314	0.517549	0.329974	0.34524	0.27733	0.545314	0.352956
6	rs6940082	0	30083074	G	C	1633	rs6940082_G	12242.1	12242.4	0.192401	0.173909	0.433795	0.262833	0.284524	0.224364	0.4526	0.285009
6	rs116790848	0	30083432	A	C	1634	rs116790848_A	12247.3	12247.9	0.241857	0.0544339	0.970389	0.117772	0.202539	0.0410315	0.220419	0.163276
6	rs2240619	0	30083432	A	C	1635	rs2240619_A	12248.3	12248.9	0.237531	0.0528672	0.979145	0.115307	0.198044	0.0397651	0.216152	0.159925
6	rs115724275	0	30083698	G	A	1636	rs115724275_G	12243.3	12244.9	0.535746	0.221962	0.458438	0.513745	0.738572	0.932859	0.474723	0.469784
6	rs115873309	0	30083754	C	A	1637	rs115873309_C	12234.7	12235.7	0.310478	0.109748	0.256259	0.302238	0.468544	0.636034	0.280289	0.270872
6	rs115899313	0	30084003	G	C	1638	rs115899313_G	12248.3	12250.3	0.958717	0.727783	0.692642	0.919932	0.909236	0.682931	0.701928	0.863126
6	rs115374425	0	30084291	G	C	1639	rs115374425_G	12247.1	12249.1	0.987444	0.909364	0.908687	0.716233	0.863511	0.637511	0.976162	0.955813
6	rs117603204	0	30084965	A	G	1640	rs117603204_A	12163.1	12158.6	0.0107351	0.000145376	0.354693	0.000774754	0.042173	0.00504854	0.00555383	0.0130648
6	rs115037049	0	30085124	G	C	1641	rs115037049_G	12208.8	12209.7	0.295834	0.00496528	0.91748	0.0662152	0.20332	0.118892	0.14597	0.124885
6	rs115692300	0	30085454	G	C	1642	rs115692300_G	12248.3	12250	0.586928	0.828727	0.617997	0.558665	0.610332	0.485815	0.729836	0.739375
6	rs115603409	0	30085952	C	G	1643	rs115603409_C	12248.3	12250.3	0.958717	0.727783	0.692642	0.919932	0.909236	0.682931	0.701928	0.863126
6	rs115985025	0	30086006	A	G	1644	rs115985025_A	12248.3	12249.4	0.327322	0.11284	0.276486	0.317968	0.497281	0.672763	0.299692	0.291009
6	rs12661053	0	30086006	A	G	1645	rs12661053_A	12248.3	12249.4	0.327322	0.11284	0.276486	0.317968	0.497281	0.672763	0.299692	0.291009
6	rs116641868	0	30086331	A	G	1646	rs116641868_A	12242.9	12244.1	0.393456	0.0846747	0.723476	0.127787	0.150983	0.187189	0.153505	0.0457558
6	rs4713281	0	30086331	A	G	1647	rs4713281_A	12241.4	12242.6	0.349629	0.0716343	0.663991	0.10803	0.128502	0.161171	0.130006	0.0371342
6	rs115899276	0	30086505	G	A	1648	rs115899276_G	12245.6	12243.3	0.0370907	0.352715	0.0344402	0.0438098	0.012196	0.00338891	0.00676115	0.00757161
6	rs114426144	0	30086632	C	G	1649	rs114426144_C	12248.3	12250.3	0.87954	0.987602	0.82156	0.938367	0.461904	0.592065	0.760416	0.635854
6	rs116774144	0	30087368	G	A	1650	rs116774144_G	12247.4	12248	0.231421	0.208083	0.504778	0.320629	0.341891	0.274284	0.530093	0.33982
6	rs114218820	0	30087558	G	A	1651	rs114218820_G	12248.3	12250.3	0.958717	0.727783	0.692642	0.919932	0.909236	0.682931	0.701928	0.863126
6	rs114784126	0	30087622	A	G	1652	rs114784126_A	12245.4	12246.4	0.323232	0.11156	0.272191	0.313193	0.492513	0.666522	0.296343	0.28783
6	rs115866444	0	30087776	C	A	1653	rs115866444_C	12244.2	12242.7	0.0612914	1.75411e-05	0.846688	0.00527769	0.147167	0.0619338	0.0366887	0.0715146
6	rs356971	0	30087776	C	A	1654	rs356971_C	12244.7	12243.2	0.0597344	1.65691e-05	0.83841	0.00509837	0.144099	0.0602776	0.0356804	0.0697973
6	rs116239920	0	30087805	G	A	1655	rs116239920_G	12248.3	12250.3	0.92386	0.756191	0.724906	0.953053	0.876391	0.653393	0.732206	0.895674
6	rs115329902	0	30087995	C	A	1656	rs115329902_C	12248.3	12249.7	0.427616	0.376069	0.0955851	0.517553	0.00624012	0.0228304	0.343936	0.4083
6	rs114662508	0	30088052	G	A	1657	rs114662508_G	12248.3	12248.7	0.196726	0.182005	0.43823	0.274269	0.295889	0.234835	0.466837	0.293293
6	rs3734836	0	30088052	G	A	1658	rs3734836_G	12248.3	12248.7	0.200855	0.185954	0.445002	0.278552	0.301303	0.239851	0.472646	0.297523
6	rs116039800	0	30088169	A	G	1659	rs116039800_A	12158.2	12160	0.666097	0.266694	0.605886	0.656132	0.890506	0.914325	0.637044	0.615711
6	rs3115635	0	30088472	A	G	1660	rs3115635_A	12202.4	12203.1	0.250863	0.060441	0.957134	0.124673	0.211769	0.0423684	0.23529	0.166835
6	rs115621121	0	30089042	G	A	1661	rs115621121_G	12244.3	12244	0.129805	0.0712472	0.332714	0.1725	0.217039	0.161374	0.285847	0.201
6	rs116145040	0	30089166	G	A	1662	rs116145040_G	12248.3	12248.8	0.22129	0.19696	0.487936	0.306338	0.328534	0.262952	0.513314	0.326604
6	rs115147953	0	30089406	G	A	1663	rs115147953_G	12248.3	12250.1	0.659131	0.516723	0.0958613	0.744338	0.046649	0.639484	0.333499	0.423444
6	rs9261136	0	30089406	G	A	1664	rs9261136_G	12241.3	12243	0.563644	0.433415	0.0732118	0.650294	0.0341529	0.551061	0.27216	0.350836
6	rs114587875	0	30089494	A	G	1665	rs114587875_A	12155.7	12151.8	0.0150946	0.0130565	0.0502607	0.023042	0.0256354	0.0180728	0.055253	0.0255571
6	rs9261138	0	30089494	A	G	1666	rs9261138_A	12202.3	12200.7	0.0559968	0.0434487	0.162942	0.0831372	0.08581	0.0629112	0.169983	0.085292
6	rs115465871	0	30089729	A	G	1667	rs115465871_A	12248.3	12249.7	0.433721	0.378948	0.779973	0.774134	0.557642	0.526903	0.659136	0.729321
6	rs114432553	0	30090020	G	C	1668	rs114432553_G	12241.5	12242.6	0.339278	0.294803	0.660915	0.648865	0.472248	0.441135	0.55576	0.852132
6	rs116238313	0	30090742	C	G	1669	rs116238313_C	12245.3	12246.5	0.396542	0.143218	0.338752	0.383806	0.583929	0.766935	0.360238	0.349032
6	rs6457126	0	30091018	A	G	1670	rs6457126_A	12247.8	12248.4	0.234007	0.0523462	0.98564	0.113881	0.196533	0.0392454	0.214401	0.157584
6	rs114356170	0	30091123	T	A	1671	rs114356170_T	12248.3	12249.9	0.527645	0.678627	0.458377	0.714194	0.282272	0.119662	0.377865	0.341159
6	rs114019025	0	30091204	A	G	1672	rs114019025_A	12214.9	12216.7	0.617165	0.582274	0.550181	0.820674	0.348671	0.159785	0.452163	0.41451
6	rs356954	0	30091517	G	A	1673	rs356954_G	12248.3	12249.6	0.390347	0.0086283	0.937253	0.0962705	0.275039	0.16592	0.199862	0.172437
6	rs116542020	0	30091694	C	A	1674	rs116542020_C	12241.7	12243.5	0.621736	0.393844	0.059744	0.63409	0.0269664	0.514981	0.228943	0.298386
6	rs115150143	0	30092102	A	G	1675	rs115150143_A	12178	12179.6	0.496991	0.318995	0.0402954	0.514372	0.0156942	0.384715	0.174364	0.230879
6	rs116693421	0	30092231	A	G	1676	rs116693421_A	12248.3	12249.5	0.377058	0.0782753	0.690439	0.115979	0.138613	0.174317	0.137333	0.0410317
6	rs9357092	0	30092231	A	G	1677	rs9357092_A	12248.3	12249.5	0.377058	0.0782753	0.690439	0.115979	0.138613	0.174317	0.137333	0.0410317
6	rs115293893	0	30092822	A	C	1678	rs115293893_A	12248.3	12249.4	0.325886	0.501377	0.137786	0.554652	0.00589806	0.023383	0.45896	0.506231
6	rs116724742	0	30092844	A	G	1679	rs116724742_A	12248.3	12250.3	0.92165	0.755493	0.732328	0.958267	0.871287	0.650416	0.738455	0.901753
6	rs114917796	0	30093304	G	A	1680	rs114917796_G	12247.9	12248.3	0.213578	0.191567	0.470285	0.295317	0.316606	0.253473	0.496514	0.314373
6	rs115931096	0	30093467	G	A	1681	rs115931096_G	12248.3	12248.9	0.238849	0.211639	0.511234	0.325128	0.347592	0.279682	0.535851	0.345408
6	rs116554894	0	30093609	G	A	1682	rs116554894_G	12243.4	12244.7	0.398509	0.0861456	0.731011	0.130102	0.150244	0.18728	0.1558	0.0472194
6	rs115136522	0	30093828	A	G	1683	rs115136522_A	12248.3	12250.3	0.957266	0.713488	0.695366	0.91674	0.907418	0.683462	0.696421	0.858456
6	rs6926792	0	30093828	A	G	1684	rs6926792_A	12248.3	12250.3	0.913099	0.763984	0.739117	0.9656	0.863617	0.64274	0.745423	0.908704
6	rs115846644	0	30094121	A	G	1685	rs115846644_A	12248.3	12249.4	0.327322	0.11284	0.276486	0.317968	0.497281	0.672763	0.299692	0.291009
6	rs114175826	0	30094303	A	T	1686	rs114175826_A	12211.8	12205.1	0.00311507	1.17172e-10	0.313333	2.62592e-06	0.0399449	0.00104005	0.000291194	0.00199699
6	rs3115631	0	30094303	A	T	1687	rs3115631_A	12209.6	12202.3	0.00225648	6.40603e-11	0.26913	1.66772e-06	0.0302884	0.000694605	0.000190502	0.00135228
6	rs116796019	0	30094389	G	A	1688	rs116796019_G	12248.3	12249.6	0.38472	0.580081	0.170485	0.63298	0.00831844	0.0313017	0.53491	0.588701
6	rs114256021	0	30094406	G	A	1689	rs114256021_G	12246.7	12248.7	0.953068	0.731208	0.703969	0.929689	0.901382	0.676196	0.712776	0.872922
6	rs114797859	0	30094480	A	G	1690	rs114797859_A	12248.3	12249.4	0.327322	0.11284	0.276486	0.317968	0.497281	0.672763	0.299692	0.291009
6	rs115435602	0	30094663	G	A	1691	rs115435602_G	12248.3	12250.3	0.831679	0.156355	0.839228	0.667817	0.731718	0.370377	0.947736	0.980656
6	rs114564278	0	30095099	G	A	1692	rs114564278_G	12248.3	12250.3	0.947917	0.735482	0.706632	0.932442	0.896385	0.672086	0.714958	0.876079
6	rs114088855	0	30095101	G	A	1693	rs114088855_G	12246.3	12246.6	0.187647	0.121992	0.228919	0.109194	0.256999	0.360661	0.109159	0.142775
6	rs114336030	0	30095163	A	G	1694	rs114336030_A	12248.3	12249.6	0.396037	0.0855151	0.726744	0.12748	0.149889	0.187451	0.153572	0.0460977
6	rs4711206	0	30095163	A	G	1695	rs4711206_A	12241.8	12243	0.388757	0.0832177	0.718029	0.124677	0.145307	0.182515	0.15062	0.0451245
6	rs3869065	0	30095453	G	C	1696	rs3869065_G	12230.4	12231.4	0.312016	0.0781879	0.849615	0.163502	0.262587	0.0585485	0.291548	0.222322
6	rs115012064	0	30095717	A	G	1697	rs115012064_A	12248.3	12248.9	0.225801	0.205754	0.492706	0.31248	0.335656	0.269142	0.521071	0.334335
6	rs114028028	0	30096378	A	G	1698	rs114028028_A	12248.3	12250.3	0.947917	0.735482	0.706632	0.932442	0.896385	0.672086	0.714958	0.876079
6	rs116726170	0	30096418	C	A	1699	rs116726170_C	12248.3	12248.9	0.237652	0.210143	0.50881	0.324368	0.346463	0.278611	0.534952	0.34322
6	rs3891157	0	30096418	C	A	1700	rs3891157_C	12248.3	12248.8	0.214085	0.192002	0.471023	0.295807	0.317149	0.254019	0.497153	0.315101
6	rs116084313	0	30096621	A	G	1701	rs116084313_A	12247.4	12245.8	0.0588542	1.6397e-05	0.826292	0.00482772	0.140599	0.0588536	0.0341592	0.0676021
6	rs3129012	0	30096621	A	G	1702	rs3129012_A	12248.3	12246.8	0.0595168	1.67481e-05	0.828677	0.00490524	0.141715	0.0595174	0.0345676	0.0682769
6	rs116404275	0	30096719	A	G	1703	rs116404275_A	12248.3	12248.8	0.214085	0.192002	0.471023	0.295807	0.317149	0.254019	0.497153	0.315101
6	rs115362062	0	30096943	G	A	1704	rs115362062_G	12247.9	12249	0.32798	0.113185	0.277021	0.318584	0.49799	0.673424	0.300293	0.291586
6	rs114925851	0	30097167	G	A	1705	rs114925851_G	12247.1	12248.1	0.329617	0.113567	0.278539	0.320446	0.50062	0.676954	0.30183	0.293184
6	rs114229542	0	30097668	A	G	1706	rs114229542_A	12248.3	12249.4	0.327322	0.11284	0.276486	0.317968	0.497281	0.672763	0.299692	0.291009
6	rs115707880	0	30097674	C	G	1707	rs115707880_C	12241.5	12242.7	0.391886	0.00876076	0.933504	0.0965858	0.277344	0.170025	0.202992	0.173446
6	rs165255	0	30097674	G	C	1708	rs165255_G	12135.7	12136.6	0.310081	0.00509791	0.958747	0.0662267	0.211563	0.120041	0.155928	0.130261
6	rs114438929	0	30098004	A	G	1709	rs114438929_A	12248.3	12246.8	0.0606517	0.124475	0.129049	0.077617	0.16077	0.192165	0.12122	0.205939
6	rs11970651	0	30098882	G	A	1710	rs11970651_G	12248.3	12250.3	0.998832	0.917856	0.900809	0.70709	0.871779	0.645364	0.986912	0.945863
6	rs9261156	0	30099517	A	C	1711	rs9261156_A	12232.3	12233.8	0.449913	0.407686	0.823813	0.584046	0.608648	0.508027	0.855862	0.613254
6	rs115310883	0	30099552	A	G	1712	rs115310883_A	12240	12241	0.317598	0.109103	0.267687	0.306832	0.486974	0.661527	0.289951	0.281676
6	rs114447065	0	30099628	G	A	1713	rs114447065_G	12248.3	12248.8	0.214085	0.192002	0.471023	0.295807	0.317149	0.254019	0.497153	0.315101
6	rs116494283	0	30099678	G	A	1714	rs116494283_G	12248.3	12250.3	0.947917	0.735482	0.706632	0.932442	0.896385	0.672086	0.714958	0.876079
6	rs6919617	0	30099678	G	A	1715	rs6919617_G	12248.3	12250.3	0.947917	0.735482	0.706632	0.932442	0.896385	0.672086	0.714958	0.876079
6	rs115920192	0	30099777	A	G	1716	rs115920192_A	12248.3	12248.8	0.214085	0.192002	0.471023	0.295807	0.317149	0.254019	0.497153	0.315101
6	rs114014227	0	30099846	A	G	1717	rs114014227_A	12248.3	12247	0.0698573	2.17495e-05	0.889476	0.00624915	0.163736	0.0701507	0.0419063	0.0799862
6	rs114472966	0	30099906	A	G	1718	rs114472966_A	12248.3	12249.4	0.344293	0.114617	0.526446	0.324154	0.430511	0.454239	0.343775	0.424418
6	rs115059203	0	30100240	A	G	1719	rs115059203_A	12247.9	12249.1	0.353858	0.189014	0.796617	0.39549	0.906409	0.826861	0.524472	0.886468
6	rs1150743	0	30100240	A	G	1720	rs1150743_A	12248.3	12249.5	0.353039	0.188252	0.795466	0.394668	0.904539	0.82491	0.523403	0.884514
6	rs115450853	0	30100265	A	G	1721	rs115450853_A	12248.1	12248.5	0.213891	0.191737	0.470377	0.295571	0.316621	0.253629	0.496534	0.314702
6	rs114665269	0	30100593	A	G	1722	rs114665269_A	12248.3	12249.4	0.327322	0.11284	0.276486	0.317968	0.497281	0.672763	0.299692	0.291009
6	rs115509202	0	30100716	A	G	1723	rs115509202_A	12248.3	12249.9	0.527645	0.678627	0.458377	0.714194	0.282272	0.119662	0.377865	0.341159
6	rs116045781	0	30100744	G	A	1724	rs116045781_G	12247.3	12248.9	0.53676	0.668089	0.466144	0.723464	0.285528	0.121604	0.38407	0.347451
6	rs114062315	0	30100952	A	G	1725	rs114062315_A	12247.5	12248	0.219615	0.198353	0.479366	0.303009	0.326016	0.262438	0.507466	0.323379
6	rs116393526	0	30101065	G	A	1726	rs116393526_G	12248.3	12248.8	0.214085	0.192002	0.471023	0.295807	0.317149	0.254019	0.497153	0.315101
6	rs115138973	0	30101175	C	G	1727	rs115138973_C	12248.3	12249.9	0.527645	0.678627	0.458377	0.714194	0.282272	0.119662	0.377865	0.341159
6	rs166325	0	30101175	C	G	1728	rs166325_C	12248.3	12249.9	0.527645	0.678627	0.458377	0.714194	0.282272	0.119662	0.377865	0.341159
6	rs115562990	0	30104100	G	A	1729	rs115562990_G	12248.3	12248.8	0.214085	0.192002	0.471023	0.295807	0.317149	0.254019	0.497153	0.315101
6	rs114360473	0	30104234	G	A	1730	rs114360473_G	12247.8	12249.7	0.67613	0.531094	0.100288	0.762034	0.0483546	0.652687	0.343825	0.435565
6	rs116483615	0	30106161	G	A	1731	rs116483615_G	12248.3	12250.3	0.913099	0.763984	0.739117	0.9656	0.863617	0.64274	0.745423	0.908704
6	rs116155752	0	30106239	A	G	1732	rs116155752_A	12248.3	12248.8	0.214085	0.192002	0.471023	0.295807	0.317149	0.254019	0.497153	0.315101
6	rs115931681	0	30106630	G	C	1733	rs115931681_G	12248.3	12250.3	0.955107	0.725462	0.700433	0.924294	0.905221	0.679461	0.706911	0.867989
6	rs114194707	0	30106851	A	G	1734	rs114194707_A	12245.2	12247.2	0.835394	0.948407	0.866879	0.981967	0.499459	0.633275	0.801979	0.675433
6	rs9261185	0	30107230	G	A	1735	rs9261185_G	12248.3	12250.3	0.913099	0.763984	0.739117	0.9656	0.863617	0.64274	0.745423	0.908704
6	rs114799689	0	30108499	A	C	1736	rs114799689_A	12225.7	12226.5	0.260995	0.0606293	0.93163	0.127451	0.214255	0.0440366	0.236805	0.174882
6	rs9261190	0	30108693	G	A	1737	rs9261190_G	12247.8	12249.8	0.904841	0.974968	0.79831	0.908293	0.445812	0.57219	0.730766	0.609649
6	rs115438899	0	30108702	A	G	1738	rs115438899_A	12248.3	12249.4	0.327322	0.11284	0.276486	0.317968	0.497281	0.672763	0.299692	0.291009
6	rs114566308	0	30108952	C	A	1739	rs114566308_C	12245.2	12246.5	0.380079	0.134424	0.326175	0.373357	0.561059	0.743281	0.353093	0.344919
6	rs10947046	0	30108952	C	A	1740	rs10947046_C	12224.6	12226	0.464653	0.193503	0.382891	0.424329	0.646616	0.838565	0.404704	0.397952
6	rs113995577	0	30109682	A	G	1741	rs113995577_A	12248.3	12249.8	0.465957	0.399925	0.818709	0.809211	0.590935	0.556226	0.691769	0.695506
6	rs116465145	0	30109749	G	A	1742	rs116465145_G	12248.3	12249.9	0.527645	0.678627	0.458377	0.714194	0.282272	0.119662	0.377865	0.341159
6	rs116792403	0	30109929	A	G	1743	rs116792403_A	12248.3	12248.8	0.210112	0.192476	0.464171	0.290031	0.309959	0.246216	0.489851	0.310895
6	rs115227030	0	30110031	G	A	1744	rs115227030_G	12248.3	12249.6	0.39287	0.00892746	0.932526	0.0971554	0.279219	0.170111	0.20445	0.175347
6	rs116642932	0	30110152	G	A	1745	rs116642932_G	12248.3	12248.8	0.214085	0.192002	0.471023	0.295807	0.317149	0.254019	0.497153	0.315101
6	rs115656811	0	30110420	C	G	1746	rs115656811_C	12248.3	12248.9	0.238516	0.0528505	0.977467	0.115777	0.200213	0.0399302	0.217087	0.159749
6	rs115223080	0	30110772	C	G	1747	rs115223080_C	12248.3	12250.1	0.666575	0.523631	0.0977299	0.750937	0.0475344	0.646057	0.337494	0.428592
6	rs3121593	0	30110772	C	G	1748	rs3121593_C	12247.8	12249.6	0.66531	0.5224	0.0973568	0.749816	0.0473536	0.645182	0.336532	0.427499
6	rs115032519	0	30110860	G	A	1749	rs115032519_G	12248.3	12249.6	0.389652	0.0313238	0.680415	0.164581	0.456613	0.203664	0.436422	0.360569
6	rs166327	0	30110860	G	A	1750	rs166327_G	12248.3	12249.6	0.389652	0.0313238	0.680415	0.164581	0.456613	0.203664	0.436422	0.360569
6	rs116735891	0	30110921	A	G	1751	rs116735891_A	12248.3	12250.3	0.947917	0.735482	0.706632	0.932442	0.896385	0.672086	0.714958	0.876079
6	rs114374251	0	30111089	G	A	1752	rs114374251_G	12248.3	12250.3	0.913099	0.763984	0.739117	0.9656	0.863617	0.64274	0.745423	0.908704
6	rs114927984	0	30111284	A	G	1753	rs114927984_A	12243	12245	0.897431	0.783326	0.753234	0.979498	0.849037	0.628445	0.760958	0.925518
6	rs9261200	0	30111284	A	G	1754	rs9261200_A	12244.4	12246.4	0.926161	0.753289	0.726854	0.952918	0.877302	0.656241	0.732986	0.89455
6	rs116167601	0	30111743	G	A	1755	rs116167601_G	12248.3	12246.3	0.0457394	0.000866223	0.0504918	0.0798748	0.103803	0.119594	0.0313446	0.0427163
6	rs115503816	0	30111776	G	A	1756	rs115503816_G	12248.3	12250.3	0.947917	0.735482	0.706632	0.932442	0.896385	0.672086	0.714958	0.876079
6	rs114230713	0	30112031	A	G	1757	rs114230713_A	12248.3	12250.3	0.947917	0.735482	0.706632	0.932442	0.896385	0.672086	0.714958	0.876079
6	rs3869068	0	30112031	A	G	1758	rs3869068_A	12248.3	12250.3	0.947917	0.735482	0.706632	0.932442	0.896385	0.672086	0.714958	0.876079
6	rs116555976	0	30112165	G	C	1759	rs116555976_G	12248.3	12249.9	0.527645	0.678627	0.458377	0.714194	0.282272	0.119662	0.377865	0.341159
6	rs116044290	0	30112238	G	A	1760	rs116044290_G	12248.3	12250.3	0.947917	0.735482	0.706632	0.932442	0.896385	0.672086	0.714958	0.876079
6	rs116339860	0	30112350	T	A	1761	rs116339860_T	12248.3	12249.6	0.40676	0.00916285	0.911724	0.1024	0.28783	0.173814	0.210909	0.181789
6	rs259931	0	30112350	T	A	1762	rs259931_T	12248.3	12249.6	0.409572	0.00930361	0.907146	0.103271	0.29139	0.176082	0.212599	0.183528
6	rs115329622	0	30112677	G	A	1763	rs115329622_G	12247.9	12249	0.32773	0.11308	0.276895	0.31826	0.497715	0.673161	0.300013	0.29132
6	rs115715853	0	30113022	G	A	1764	rs115715853_G	12248.3	12248.7	0.209732	0.187101	0.465747	0.29188	0.312802	0.24995	0.491947	0.311354
6	rs116555982	0	30113284	A	G	1765	rs116555982_A	12248.3	12249.6	0.402649	0.0136891	0.826393	0.13413	0.493503	0.292797	0.299818	0.296423
6	rs114218355	0	30113290	G	A	1766	rs114218355_G	12248.3	12250.3	0.913099	0.763984	0.739117	0.9656	0.863617	0.64274	0.745423	0.908704
6	rs116373137	0	30113733	A	C	1767	rs116373137_A	12248.3	12249.6	0.405836	0.0890052	0.739133	0.133947	0.154694	0.192651	0.160039	0.0486946
6	rs4711207	0	30113733	A	C	1768	rs4711207_A	12230	12231.2	0.38748	0.0830532	0.712198	0.123593	0.147408	0.184215	0.148195	0.0435158
6	rs115337808	0	30114461	G	A	1769	rs115337808_G	12245.6	12245.9	0.195045	0.174159	0.440619	0.271908	0.292144	0.233238	0.466114	0.290596
6	rs115966004	0	30114491	C	A	1770	rs115966004_C	12247.7	12248.7	0.319408	0.108491	0.270849	0.310256	0.488774	0.662179	0.292467	0.284341
6	rs115678795	0	30114744	A	G	1771	rs115678795_A	12244.2	12245.6	0.406078	0.0875622	0.736517	0.132288	0.155211	0.192169	0.157278	0.0477852
6	rs9405044	0	30114744	A	G	1772	rs9405044_A	12236.8	12238.1	0.390515	0.0830631	0.716177	0.125483	0.148609	0.185351	0.150277	0.0457268
6	rs116571013	0	30114784	A	G	1773	rs116571013_A	12248.3	12249.8	0.465957	0.399925	0.818709	0.809211	0.590935	0.556226	0.691769	0.695506
6	rs115130701	0	30114855	A	G	1774	rs115130701_A	12248.3	12249.6	0.405993	0.00911543	0.912726	0.102093	0.288669	0.174377	0.210429	0.181709
6	rs114329002	0	30115030	A	G	1775	rs114329002_A	12247.8	12249.1	0.394315	0.013123	0.836771	0.130669	0.486858	0.287946	0.294403	0.291362
6	rs259935	0	30115030	A	G	1776	rs259935_A	12248.3	12249.6	0.393982	0.0131211	0.837921	0.130614	0.485632	0.28705	0.293747	0.290723
6	rs115488962	0	30115095	G	A	1777	rs115488962_G	12248.3	12249.4	0.327322	0.11284	0.276486	0.317968	0.497281	0.672763	0.299692	0.291009
6	rs116335674	0	30115472	G	A	1778	rs116335674_G	12248.3	12249.9	0.527645	0.678627	0.458377	0.714194	0.282272	0.119662	0.377865	0.341159
6	rs259937	0	30115472	G	A	1779	rs259937_G	12248.3	12249.9	0.527645	0.678627	0.458377	0.714194	0.282272	0.119662	0.377865	0.341159
6	rs115677244	0	30115690	A	G	1780	rs115677244_A	12248.3	12249.4	0.327322	0.11284	0.276486	0.317968	0.497281	0.672763	0.299692	0.291009
6	rs115141117	0	30115963	A	G	1781	rs115141117_A	12248.3	12249.3	0.318118	0.107954	0.269993	0.30905	0.487335	0.66024	0.29152	0.283467
6	rs259938	0	30115982	C	G	1782	rs259938_C	12248.3	12249.6	0.401881	0.0138248	0.826893	0.135276	0.493834	0.294471	0.301631	0.298259
6	rs114592530	0	30116022	A	G	1783	rs114592530_A	12248.3	12249.5	0.363082	0.551193	0.15791	0.606079	0.00730289	0.0279389	0.506306	0.556204
6	rs6915205	0	30116022	A	G	1784	rs6915205_A	12248.3	12249.5	0.363082	0.551193	0.15791	0.606079	0.00730289	0.0279389	0.506306	0.556204
6	rs114740580	0	30116725	C	A	1785	rs114740580_C	12248.3	12249.6	0.412028	0.0905957	0.750172	0.137311	0.157842	0.196695	0.164171	0.0503572
6	rs3910312	0	30116725	C	A	1786	rs3910312_C	12248.3	12249.6	0.412028	0.0905957	0.750172	0.137311	0.157842	0.196695	0.164171	0.0503572
6	rs115537614	0	30116975	G	A	1787	rs115537614_G	12248.3	12250.2	0.685149	0.539504	0.103304	0.772686	0.0500514	0.664839	0.351714	0.445364
6	rs115984845	0	30117588	G	A	1788	rs115984845_G	12247.2	12247.7	0.213184	0.191097	0.468865	0.294567	0.315212	0.25258	0.494838	0.312729
6	rs114653275	0	30117643	G	A	1789	rs114653275_G	12248.3	12249.4	0.327322	0.11284	0.276486	0.317968	0.497281	0.672763	0.299692	0.291009
6	rs9261215	0	30117758	C	A	1790	rs9261215_C	12247.7	12249.7	0.903919	0.988317	0.801752	0.910919	0.447911	0.574996	0.736339	0.612468
6	rs9261215	0	30117758	C	A	1791	rs9261215_C.1	12247.1	12249	0.901824	0.989981	0.803623	0.913036	0.448767	0.576123	0.73831	0.614375
6	rs116549889	0	30118118	G	A	1792	rs116549889_G	12248.3	12250.3	0.947917	0.735482	0.706632	0.932442	0.896385	0.672086	0.714958	0.876079
6	rs116676427	0	30118471	G	A	1793	rs116676427_G	12247.6	12248.9	0.405989	0.0897973	0.742376	0.134365	0.155179	0.194659	0.161441	0.0494111
6	rs9380150	0	30118471	G	A	1794	rs9380150_G	12248.3	12249.7	0.425106	0.0965311	0.754568	0.140835	0.161409	0.202289	0.166618	0.0516359
6	rs116311506	0	30118487	G	A	1795	rs116311506_G	12248.3	12250.3	0.947917	0.735482	0.706632	0.932442	0.896385	0.672086	0.714958	0.876079
6	rs115154095	0	30118869	G	A	1796	rs115154095_G	12247.6	12248.6	0.328517	0.11329	0.277429	0.319121	0.498877	0.674291	0.300632	0.291871
6	rs115527186	0	30118936	A	G	1797	rs115527186_A	12248.3	12249.9	0.527645	0.678627	0.458377	0.714194	0.282272	0.119662	0.377865	0.341159
6	rs116147869	0	30119254	A	G	1798	rs116147869_A	12248.3	12248.8	0.214085	0.192002	0.471023	0.295807	0.317149	0.254019	0.497153	0.315101
6	rs115297621	0	30119430	A	G	1799	rs115297621_A	12248.3	12249.3	0.322494	0.263412	0.554898	0.35758	0.438797	0.372501	0.559068	0.369023
6	rs116537348	0	30119560	G	A	1800	rs116537348_G	12248.3	12249.7	0.413823	0.0145467	0.811435	0.140071	0.506109	0.302748	0.310209	0.307012
6	rs259939	0	30119560	G	A	1801	rs259939_G	12248.3	12249.7	0.413823	0.0145467	0.811435	0.140071	0.506109	0.302748	0.310209	0.307012
6	rs114931069	0	30119781	A	C	1802	rs114931069_A	12248	12249.7	0.569938	0.330937	0.700448	0.759069	0.526493	0.362148	0.525467	0.622636
6	rs11965452	0	30119781	A	C	1803	rs11965452_A	12244.8	12246.5	0.57228	0.332352	0.703763	0.761875	0.528435	0.364004	0.527363	0.625154
6	rs115930919	0	30119842	A	C	1804	rs115930919_A	12248.3	12248.8	0.214085	0.192002	0.471023	0.295807	0.317149	0.254019	0.497153	0.315101
6	rs259940	0	30119913	G	A	1805	rs259940_G	12244.2	12245.5	0.388905	0.00877857	0.938051	0.0966031	0.27584	0.168085	0.2029	0.17383
6	rs115133546	0	30120319	A	G	1806	rs115133546_A	12248.3	12249.4	0.327322	0.11284	0.276486	0.317968	0.497281	0.672763	0.299692	0.291009
6	rs114315683	0	30120603	A	G	1807	rs114315683_A	12248.3	12249.8	0.465957	0.399925	0.818709	0.809211	0.590935	0.556226	0.691769	0.695506
6	rs116450598	0	30120739	G	A	1808	rs116450598_G	12240.7	12242.1	0.452001	0.381955	0.796814	0.790968	0.567743	0.532724	0.669161	0.719722
6	rs114803444	0	30121751	G	A	1809	rs114803444_G	12248.3	12248.8	0.214085	0.192002	0.471023	0.295807	0.317149	0.254019	0.497153	0.315101
6	rs115430143	0	30121866	A	G	1810	rs115430143_A	12248.3	12248.6	0.195662	0.107625	0.443444	0.32997	0.250321	0.149689	0.369659	0.288575
6	rs116000261	0	30122436	A	G	1811	rs116000261_A	12248.3	12248.8	0.214085	0.192002	0.471023	0.295807	0.317149	0.254019	0.497153	0.315101
6	rs115119809	0	30122646	G	A	1812	rs115119809_G	12245.2	12245.3	0.166897	0.091288	0.391708	0.286461	0.216358	0.127298	0.322818	0.247553
6	rs114460244	0	30123146	A	G	1813	rs114460244_A	12248.3	12248	0.130097	0.286337	0.18087	0.260195	0.0570982	0.0289233	0.174322	0.133246
6	rs259942	0	30123146	A	G	1814	rs259942_A	12248.3	12248	0.130097	0.286337	0.18087	0.260195	0.0570982	0.0289233	0.174322	0.133246
6	rs116127162	0	30123309	G	A	1815	rs116127162_G	12247.8	12249.2	0.422164	0.00997212	0.889593	0.108585	0.30223	0.184275	0.222005	0.192189
6	rs259943	0	30123309	G	A	1816	rs259943_G	12247.8	12249.2	0.415094	0.00953628	0.901055	0.105834	0.296182	0.180396	0.216789	0.187782
6	rs115677230	0	30123573	A	C	1817	rs115677230_A	12223.9	12225.3	0.467586	0.111529	0.816532	0.16106	0.184895	0.229775	0.192227	0.0608804
6	rs116725370	0	30123706	A	C	1818	rs116725370_A	12247.1	12249.1	0.877668	0.986316	0.823891	0.94039	0.46438	0.594816	0.762842	0.638209
6	rs116295763	0	30123884	G	A	1819	rs116295763_G	12244.7	12246.5	0.636428	0.292918	0.64242	0.299647	0.501404	0.196078	0.459025	0.409477
6	rs3134879	0	30123884	G	A	1820	rs3134879_G	12244.2	12246	0.638232	0.294131	0.640533	0.301228	0.502587	0.196798	0.460829	0.411114
6	rs114193724	0	30124276	C	A	1821	rs114193724_C	12248.3	12249.4	0.327322	0.11284	0.276486	0.317968	0.497281	0.672763	0.299692	0.291009
6	rs6457138	0	30124276	C	A	1822	rs6457138_C	12248.3	12249.4	0.327322	0.11284	0.276486	0.317968	0.497281	0.672763	0.299692	0.291009
6	rs114959639	0	30124360	C	A	1823	rs114959639_C	12175.9	12176.1	0.179113	0.0969578	0.413995	0.297719	0.222142	0.134686	0.33617	0.263648
6	rs115826761	0	30124552	G	A	1824	rs115826761_G	12248.3	12248.8	0.214085	0.192002	0.471023	0.295807	0.317149	0.254019	0.497153	0.315101
6	rs116519681	0	30124789	A	T	1825	rs116519681_A	12236.4	12236.5	0.165941	0.0911602	0.388475	0.287423	0.212344	0.124279	0.326026	0.254292
6	rs12208727	0	30125010	G	A	1826	rs12208727_G	12248.3	12248.9	0.233759	0.384381	0.0768829	0.168398	0.0738905	0.0475474	0.100676	0.113583
6	rs115721109	0	30125608	A	T	1827	rs115721109_A	12210.4	12210.1	0.132751	0.127742	0.320177	0.185444	0.212485	0.163643	0.335203	0.205033
6	rs114061475	0	30125735	G	A	1828	rs114061475_G	12248.3	12249.9	0.527645	0.678627	0.458377	0.714194	0.282272	0.119662	0.377865	0.341159
6	rs114607954	0	30125738	G	A	1829	rs114607954_G	12248.3	12248.5	0.179405	0.0983228	0.414106	0.305194	0.231174	0.136896	0.343132	0.265515
6	rs259945	0	30127185	T	A	1830	rs259945_T	12248.3	12250.1	0.629202	0.0368196	0.714256	0.562026	0.916361	0.577717	0.722243	0.822088
6	rs116726751	0	30127623	A	C	1831	rs116726751_A	12248.3	12250.3	0.87954	0.987602	0.82156	0.938367	0.461904	0.592065	0.760416	0.635854
6	rs116794496	0	30127748	A	T	1832	rs116794496_A	12247.3	12247.4	0.173343	0.0942504	0.404683	0.298285	0.223066	0.131332	0.335566	0.258966
6	rs115499203	0	30128024	A	G	1833	rs115499203_A	12248.3	12250	0.59143	0.0312759	0.681771	0.534107	0.958423	0.611453	0.687092	0.782686
6	rs114547882	0	30129728	A	G	1834	rs114547882_A	12248.3	12246.1	0.0393659	0.38788	0.0375321	0.047694	0.0160799	0.00392805	0.00750839	0.00915676
6	rs115696625	0	30129920	C	G	1835	rs115696625_C	12248.3	12248.6	0.195662	0.107625	0.443444	0.32997	0.250321	0.149689	0.369659	0.288575
6	rs114604263	0	30130132	A	G	1836	rs114604263_A	12247.9	12248.2	0.195051	0.107266	0.442185	0.329223	0.24967	0.149138	0.368645	0.28756
6	rs7761314	0	30130132	A	G	1837	rs7761314_A	12248.3	12248.6	0.195662	0.107625	0.443444	0.32997	0.250321	0.149689	0.369659	0.288575
6	rs116703179	0	30130557	A	G	1838	rs116703179_A	12248.3	12250	0.547488	0.0266808	0.631636	0.486157	0.992655	0.660444	0.637351	0.730536
6	rs114294537	0	30130577	G	A	1839	rs114294537_G	12248.3	12249.8	0.465957	0.399925	0.818709	0.809211	0.590935	0.556226	0.691769	0.695506
6	rs115230033	0	30130736	G	A	1840	rs115230033_G	12246.4	12248.4	0.829227	0.533452	0.506156	0.748689	0.138464	0.238783	0.849548	0.704956
6	rs114439499	0	30130787	A	G	1841	rs114439499_A	12248.3	12248.6	0.195662	0.107625	0.443444	0.32997	0.250321	0.149689	0.369659	0.288575
6	rs114490207	0	30131058	G	A	1842	rs114490207_G	12216.4	12215	0.0634585	1.9148e-05	0.844853	0.00545102	0.147999	0.0635137	0.0372009	0.073239
6	rs114374550	0	30131847	G	A	1843	rs114374550_G	12244.8	12243	0.0505272	0.0231672	0.380201	0.0465763	0.257853	0.0330793	0.0966084	0.128151
6	rs3869070	0	30131847	G	A	1844	rs3869070_G	12248.3	12246.6	0.0541	0.0250963	0.394782	0.050173	0.26926	0.035323	0.102374	0.135587
6	rs114898901	0	30132242	A	G	1845	rs114898901_A	12248.3	12245.9	0.0361474	0.000490363	0.0496974	0.063863	0.0930811	0.11334	0.0262543	0.0360123
6	rs112048132	0	30132344	G	A	1846	rs112048132_G	12239.4	12239.1	0.136278	0.0742612	0.334257	0.240705	0.178224	0.101751	0.271313	0.207567
6	rs9261261	0	30132344	G	A	1847	rs9261261_G	12247.8	12248.2	0.19949	0.109737	0.450802	0.335516	0.255563	0.153544	0.376457	0.294873
6	rs6928431	0	30132363	T	A	1848	rs6928431_T	12248.3	12250.1	0.638711	0.495801	0.0909638	0.719817	0.0436723	0.61639	0.318066	0.406531
6	rs116298703	0	30132373	A	G	1849	rs116298703_A	12248.3	12248.6	0.195662	0.107625	0.443444	0.32997	0.250321	0.149689	0.369659	0.288575
6	rs116456685	0	30132656	A	G	1850	rs116456685_A	12248.3	12246.9	0.0648103	0.0228599	0.147028	0.0320645	0.170592	0.133247	0.0404128	0.0231548
6	rs9366752	0	30132656	A	G	1851	rs9366752_A	12248.3	12246.9	0.0648103	0.0228599	0.147028	0.0320645	0.170592	0.133247	0.0404128	0.0231548
6	rs116793054	0	30132728	C	G	1852	rs116793054_C	12248.3	12248.8	0.214085	0.192002	0.471023	0.295807	0.317149	0.254019	0.497153	0.315101
6	rs116604614	0	30133081	A	G	1853	rs116604614_A	12248.3	12245.2	0.0234063	0.00774983	0.028858	0.0240621	0.0354136	0.0530982	0.021493	0.0217745
6	rs116648556	0	30133158	A	G	1854	rs116648556_A	12248.3	12248.6	0.195662	0.107625	0.443444	0.32997	0.250321	0.149689	0.369659	0.288575
6	rs6911724	0	30133158	A	G	1855	rs6911724_A	12248.3	12248.6	0.195662	0.107625	0.443444	0.32997	0.250321	0.149689	0.369659	0.288575
6	rs115527824	0	30133189	G	A	1856	rs115527824_G	12248.3	12248.8	0.214085	0.192002	0.471023	0.295807	0.317149	0.254019	0.497153	0.315101
6	rs114518910	0	30133264	A	G	1857	rs114518910_A	12248.3	12248.7	0.198205	0.0914494	0.41304	0.328955	0.221616	0.138325	0.34231	0.266594
6	rs116217801	0	30133482	A	G	1858	rs116217801_A	12248.3	12247.7	0.106942	0.00496066	0.390055	0.0473479	0.400074	0.175305	0.102214	0.16481
6	rs259919	0	30133482	A	G	1859	rs259919_A	12248.3	12247.7	0.106942	0.00496066	0.390055	0.0473479	0.400074	0.175305	0.102214	0.16481
6	rs115942806	0	30133628	G	A	1860	rs115942806_G	12248.3	12248.4	0.165172	0.0217395	0.149802	0.148688	0.308589	0.431884	0.125708	0.142833
6	rs115694442	0	30133738	A	G	1861	rs115694442_A	12248.3	12249.9	0.527645	0.678627	0.458377	0.714194	0.282272	0.119662	0.377865	0.341159
6	rs116154879	0	30133963	C	G	1862	rs116154879_C	12248.3	12248.5	0.178665	0.0983721	0.413976	0.306476	0.23097	0.136806	0.344941	0.267252
6	rs115928788	0	30134125	G	A	1863	rs115928788_G	12248.3	12249.6	0.38472	0.580081	0.170485	0.63298	0.00831844	0.0313017	0.53491	0.588701
6	rs16896944	0	30134125	G	A	1864	rs16896944_G	12248.3	12249.6	0.38472	0.580081	0.170485	0.63298	0.00831844	0.0313017	0.53491	0.588701
6	rs17187553	0	30134143	G	A	1865	rs17187553_G	12248.3	12250.2	0.742214	0.254994	0.208518	0.455618	0.282481	0.30275	0.2843	0.341504
6	rs116688368	0	30134215	A	G	1866	rs116688368_A	12248.3	12250.3	0.906307	0.942346	0.646231	0.957209	0.92464	0.774831	0.861081	0.920654
6	rs114555753	0	30134269	G	A	1867	rs114555753_G	12247.4	12248.9	0.482705	0.414478	0.83991	0.826193	0.611204	0.575688	0.708275	0.678438
6	rs10484549	0	30134269	G	A	1868	rs10484549_G	12248.3	12249.8	0.481098	0.413662	0.837125	0.824201	0.607159	0.571659	0.706556	0.680716
6	rs115131202	0	30134329	G	A	1869	rs115131202_G	12248.3	12248.8	0.214085	0.192002	0.471023	0.295807	0.317149	0.254019	0.497153	0.315101
6	rs115324207	0	30134410	A	C	1870	rs115324207_A	12248.3	12245.4	0.0266305	0.000306071	0.0356096	0.0487263	0.0691941	0.0835344	0.0190224	0.0260096
6	rs114269250	0	30134747	A	G	1871	rs114269250_A	12248.3	12249.8	0.465957	0.399925	0.818709	0.809211	0.590935	0.556226	0.691769	0.695506
6	rs116556453	0	30135392	A	G	1872	rs116556453_A	12235.7	12235.9	0.182903	0.109262	0.409734	0.312793	0.240473	0.13958	0.349856	0.277088
6	rs116055884	0	30135431	C	G	1873	rs116055884_C	12247.7	12249.5	0.655032	0.508774	0.0960602	0.740163	0.0463875	0.634806	0.333236	0.422954
6	rs114579793	0	30135839	A	G	1874	rs114579793_A	12239	12241	0.904181	0.536082	0.103416	0.784396	0.0668003	0.794309	0.279871	0.456766
6	rs3132129	0	30135839	A	G	1875	rs3132129_A	12233	12234.8	0.673121	0.353058	0.053212	0.566541	0.0315066	0.579675	0.164699	0.296911
6	rs115146597	0	30136331	A	G	1876	rs115146597_A	12248.3	12250	0.57031	0.331168	0.700792	0.759308	0.526799	0.362311	0.525662	0.622785
6	rs3757328	0	30136331	A	G	1877	rs3757328_A	12248.3	12250	0.57031	0.331168	0.700792	0.759308	0.526799	0.362311	0.525662	0.622785
6	rs115459021	0	30136403	C	A	1878	rs115459021_C	12242	12242	0.161547	0.0902037	0.384361	0.282804	0.209901	0.124299	0.322347	0.245363
6	rs3757329	0	30136403	C	A	1879	rs3757329_C	12248.3	12248.6	0.195662	0.107625	0.443444	0.32997	0.250321	0.149689	0.369659	0.288575
6	rs114225239	0	30136456	G	A	1880	rs114225239_G	12248.3	12248.8	0.214085	0.192002	0.471023	0.295807	0.317149	0.254019	0.497153	0.315101
6	rs114182975	0	30136531	A	G	1881	rs114182975_A	12248.3	12250.3	0.87954	0.987602	0.82156	0.938367	0.461904	0.592065	0.760416	0.635854
6	rs116452070	0	30136585	A	C	1882	rs116452070_A	12248.3	12250	0.546265	0.306976	0.666908	0.724423	0.49782	0.337575	0.499578	0.591369
6	rs3757333	0	30136585	A	C	1883	rs3757333_A	12248.3	12250	0.57031	0.331168	0.700792	0.759308	0.526799	0.362311	0.525662	0.622785
6	rs115999600	0	30136779	G	A	1884	rs115999600_G	12244.2	12245.4	0.398583	0.0856672	0.731104	0.130155	0.152539	0.189618	0.155308	0.0471202
6	rs7769930	0	30136786	C	A	1885	rs7769930_C	12248.3	12248.5	0.178665	0.0983721	0.413976	0.306476	0.23097	0.136806	0.344941	0.267252
6	rs1150742	0	30136810	G	A	1886	rs1150742_G	12248.3	12249.7	0.434416	0.0104805	0.873855	0.112388	0.308546	0.188417	0.228683	0.198094
6	rs7770505	0	30136892	A	G	1887	rs7770505_A	12248.3	12248.9	0.231922	0.207936	0.501564	0.320191	0.340323	0.273196	0.530165	0.340689
6	rs116676006	0	30137088	G	C	1888	rs116676006_G	12243	12243	0.155759	0.0860485	0.371421	0.271045	0.204263	0.119603	0.305812	0.236717
6	rs7770557	0	30137088	G	C	1889	rs7770557_G	12248.3	12248.5	0.178665	0.0983721	0.413976	0.306476	0.23097	0.136806	0.344941	0.267252
6	rs114359799	0	30137238	C	G	1890	rs114359799_C	12248.3	12249.3	0.314662	0.477649	0.567648	0.331245	0.53793	0.289121	0.443026	0.395831
6	rs114670809	0	30137322	A	C	1891	rs114670809_A	12248.3	12250.3	0.992861	0.406021	0.332067	0.644281	0.422489	0.461508	0.40221	0.467997
6	rs115299819	0	30138036	A	G	1892	rs115299819_A	12248.3	12248.8	0.214085	0.192002	0.471023	0.295807	0.317149	0.254019	0.497153	0.315101
6	rs114191643	0	30138093	A	G	1893	rs114191643_A	12245.3	12247.1	0.6182	0.479406	0.0849444	0.697348	0.0406979	0.597298	0.303242	0.387711
6	rs111406620	0	30138114	A	G	1894	rs111406620_A	12248.3	12248.6	0.191225	0.171722	0.432461	0.266217	0.287755	0.229324	0.455823	0.285492
6	rs116052764	0	30138168	A	T	1895	rs116052764_A	12248.3	12248.8	0.214085	0.192002	0.471023	0.295807	0.317149	0.254019	0.497153	0.315101
6	rs116765795	0	30138668	A	C	1896	rs116765795_A	12238.5	12240.3	0.651252	0.0369622	0.738803	0.581326	0.895505	0.566344	0.744812	0.844467
6	rs1150740	0	30138668	A	C	1897	rs1150740_A	12240.2	12241.9	0.624564	0.0356555	0.712091	0.555932	0.917369	0.579549	0.72057	0.816836
6	rs114897040	0	30138768	A	G	1898	rs114897040_A	12248.3	12248.6	0.195662	0.107625	0.443444	0.32997	0.250321	0.149689	0.369659	0.288575
6	rs9261275	0	30138907	A	G	1899	rs9261275_A	12248.3	12248.6	0.190242	0.103943	0.435811	0.322089	0.243411	0.145448	0.361612	0.28234
6	rs114059138	0	30139038	A	G	1900	rs114059138_A	12248.3	12248.8	0.214085	0.192002	0.471023	0.295807	0.317149	0.254019	0.497153	0.315101
6	rs114622275	0	30139070	G	A	1901	rs114622275_G	12246.9	12247.3	0.201801	0.111847	0.453373	0.33766	0.259199	0.155935	0.378189	0.295964
6	rs1150739	0	30139324	G	A	1902	rs1150739_G	12247.8	12247.6	0.132238	0.0011979	0.838232	0.0492557	0.205804	0.0757197	0.140555	0.116272
6	rs114331393	0	30139341	A	G	1903	rs114331393_A	12248.3	12248.6	0.189261	0.104124	0.432104	0.319916	0.241066	0.143882	0.358556	0.278642
6	rs114705281	0	30139435	A	G	1904	rs114705281_A	12248.3	12249.8	0.465957	0.399925	0.818709	0.809211	0.590935	0.556226	0.691769	0.695506
6	rs115856529	0	30140298	G	C	1905	rs115856529_G	12248.3	12250.1	0.646189	0.629529	0.647892	0.659648	0.644972	0.642732	0.723095	0.662167
6	rs116149953	0	30140474	G	A	1906	rs116149953_G	12248.3	12250.3	0.884839	0.788521	0.76594	0.991449	0.838861	0.621312	0.77341	0.936777
6	rs116480994	0	30140501	C	A	1907	rs116480994_C	12247.8	12245.9	0.0476727	2.04227e-08	0.961102	0.000168087	0.260665	0.0175334	0.00597821	0.0278071
6	rs8321	0	30140501	C	A	1908	rs8321_C	12248.3	12246.4	0.047141	1.98854e-08	0.956535	0.000165253	0.257973	0.0172308	0.00587271	0.0274133
6	rs114739617	0	30140652	G	A	1909	rs114739617_G	12248.3	12250	0.596587	0.205094	0.519154	0.599042	0.810137	0.956061	0.572636	0.546027
6	rs3188482	0	30140652	G	A	1910	rs3188482_G	12247.4	12249.1	0.598895	0.206428	0.521373	0.602032	0.812648	0.953455	0.575846	0.549221
6	rs116253474	0	30140896	G	A	1911	rs116253474_G	12245.6	12247.2	0.519632	0.450701	0.876544	0.867859	0.647006	0.608704	0.749277	0.648635
6	rs114805406	0	30141451	G	A	1912	rs114805406_G	12248.3	12250.1	0.662124	0.520886	0.0967903	0.748446	0.0464586	0.640979	0.335808	0.427212
6	rs116674671	0	30141669	A	C	1913	rs116674671_A	12248.3	12248.8	0.220102	0.197627	0.478067	0.300537	0.321906	0.258519	0.502709	0.319016
6	rs3807030	0	30141669	A	C	1914	rs3807030_A	12248.3	12248.8	0.220102	0.197627	0.478067	0.300537	0.321906	0.258519	0.502709	0.319016
6	rs116131149	0	30141863	A	C	1915	rs116131149_A	12247.8	12248.7	0.296212	0.0656789	0.477006	0.0947049	0.0922548	0.0973068	0.08875	0.0219989
6	rs3807031	0	30141863	A	C	1916	rs3807031_A	12247.8	12248.7	0.296212	0.0656789	0.477006	0.0947049	0.0922548	0.0973068	0.08875	0.0219989
6	rs116034860	0	30142163	G	A	1917	rs116034860_G	12248.3	12250.3	0.87954	0.987602	0.82156	0.938367	0.461904	0.592065	0.760416	0.635854
6	rs114346141	0	30142268	G	A	1918	rs114346141_G	12248.3	12250.3	0.895774	0.953261	0.63757	0.966202	0.916381	0.766065	0.853034	0.913033
6	rs114594700	0	30143068	A	C	1919	rs114594700_A	12248.3	12250	0.580227	0.0300083	0.66414	0.514144	0.974351	0.631143	0.671372	0.766103
6	rs115497578	0	30143320	A	G	1920	rs115497578_A	12246.8	12248.5	0.639431	0.526388	0.952336	0.898115	0.863688	0.868059	0.866976	0.95393
6	rs114813595	0	30143486	T	A	1921	rs114813595_T	12248.1	12249.9	0.646049	0.629282	0.647598	0.659458	0.644687	0.642481	0.722778	0.661895
6	rs115679178	0	30143784	T	A	1922	rs115679178_T	12248.3	12248.8	0.220102	0.197627	0.478067	0.300537	0.321906	0.258519	0.502709	0.319016
6	rs116147561	0	30144062	A	C	1923	rs116147561_A	12248.3	12248.8	0.220102	0.197627	0.478067	0.300537	0.321906	0.258519	0.502709	0.319016
6	rs9261285	0	30144062	A	C	1924	rs9261285_A	12248.3	12248.8	0.220102	0.197627	0.478067	0.300537	0.321906	0.258519	0.502709	0.319016
6	rs114999050	0	30144248	G	A	1925	rs114999050_G	12248.3	12248.8	0.220102	0.197627	0.478067	0.300537	0.321906	0.258519	0.502709	0.319016
6	rs115051271	0	30144312	G	C	1926	rs115051271_G	12247.9	12249.4	0.466565	0.400602	0.819407	0.809918	0.591737	0.557074	0.69239	0.695051
6	rs116620177	0	30144450	A	C	1927	rs116620177_A	12245	12247	0.959609	0.722918	0.697976	0.919489	0.907599	0.687361	0.708751	0.86977
6	rs2074482	0	30144450	A	C	1928	rs2074482_A	12244.8	12246.8	0.958472	0.72382	0.698319	0.920709	0.907274	0.687034	0.709316	0.86911
6	rs17187707	0	30144507	G	A	1929	rs17187707_G	12242.4	12243.7	0.403379	0.307171	0.457144	0.219758	0.218868	0.290408	0.251756	0.199792
6	rs114117899	0	30144549	G	A	1930	rs114117899_G	12248.3	12248.8	0.220102	0.197627	0.478067	0.300537	0.321906	0.258519	0.502709	0.319016
6	rs116449930	0	30145332	A	G	1931	rs116449930_A	12247.8	12249.8	0.878237	0.985814	0.822655	0.939756	0.462562	0.592958	0.761765	0.637154
6	rs9261288	0	30145332	A	G	1932	rs9261288_A	12248.3	12250.3	0.87954	0.987602	0.82156	0.938367	0.461904	0.592065	0.760416	0.635854
6	rs115822288	0	30145595	A	C	1933	rs115822288_A	12248.3	12250.3	0.87954	0.987602	0.82156	0.938367	0.461904	0.592065	0.760416	0.635854
6	rs115882910	0	30145696	C	A	1934	rs115882910_C	12248.3	12247.2	0.0768758	0.0657587	0.0878376	0.0982148	0.108062	0.0867265	0.100772	0.123994
6	rs116710187	0	30145969	G	A	1935	rs116710187_G	12248.3	12250.1	0.655366	0.51135	0.0954746	0.743637	0.0461758	0.638019	0.334348	0.423425
6	rs1245371	0	30146331	G	A	1936	rs1245371_G	12245.2	12246.2	0.318137	0.00601547	0.961633	0.0746824	0.219282	0.129694	0.170598	0.139596
6	rs116714959	0	30146362	C	G	1937	rs116714959_C	12247.8	12246.4	0.0627206	0.00472387	0.0541295	0.0561285	0.111982	0.138638	0.0237259	0.0301801
6	rs115497370	0	30146626	G	A	1938	rs115497370_G	12248.3	12246.1	0.0393066	1.31311e-08	0.901135	0.000119945	0.229432	0.0140278	0.00471935	0.0228553
6	rs9261290	0	30146626	G	A	1939	rs9261290_G	12248.3	12246.1	0.0393066	1.31311e-08	0.901135	0.000119945	0.229432	0.0140278	0.00471935	0.0228553
6	rs114577955	0	30146691	A	G	1940	rs114577955_A	12193.4	12195.2	0.69287	0.982427	0.968155	0.803512	0.653734	0.466137	0.972966	0.855435
6	rs9261291	0	30146691	A	G	1941	rs9261291_A	12198.2	12200	0.623196	0.379767	0.353093	0.524213	0.66913	0.889673	0.365622	0.486166
6	rs115037604	0	30146802	G	A	1942	rs115037604_G	12248.3	12249.4	0.330202	0.112762	0.278991	0.316785	0.498411	0.66817	0.301907	0.291974
6	rs115745708	0	30147219	A	C	1943	rs115745708_A	12223.4	12225.3	0.737068	0.93126	0.913892	0.867586	0.698059	0.501583	0.904915	0.924972
6	rs2301753	0	30147219	A	C	1944	rs2301753_A	12244.8	12246.8	0.917091	0.759909	0.73733	0.959988	0.86914	0.652311	0.746184	0.907602
6	rs114516919	0	30147463	A	G	1945	rs114516919_A	12246.6	12247	0.212223	0.19078	0.468767	0.293633	0.31494	0.252256	0.494789	0.313694
6	rs2301751	0	30147463	A	G	1946	rs2301751_A	12248.3	12248.8	0.214085	0.192002	0.471023	0.295807	0.317149	0.254019	0.497153	0.315101
6	rs114102189	0	30147546	A	T	1947	rs114102189_A	12248.3	12249.4	0.330202	0.112762	0.278991	0.316785	0.498411	0.66817	0.301907	0.291974
6	rs115082201	0	30147620	G	A	1948	rs115082201_G	12248.3	12250.3	0.944518	0.73506	0.709734	0.930877	0.895417	0.675668	0.717584	0.877276
6	rs114315771	0	30147671	A	G	1949	rs114315771_A	12248.3	12250.3	0.819943	0.669788	0.740046	0.961559	0.777223	0.706134	0.854634	0.83879
6	rs115290895	0	30147731	T	A	1950	rs115290895_T	12248.3	12248.8	0.214085	0.192002	0.471023	0.295807	0.317149	0.254019	0.497153	0.315101
6	rs116618813	0	30147746	G	C	1951	rs116618813_G	12248	12249.1	0.330682	0.113001	0.279525	0.317196	0.499121	0.668817	0.302345	0.292396
6	rs114108823	0	30147824	A	G	1952	rs114108823_A	12248.3	12250.3	0.909717	0.763552	0.742266	0.964028	0.862659	0.646263	0.748085	0.909905
6	rs116401500	0	30147880	A	G	1953	rs116401500_A	12247.8	12249.8	0.942626	0.737267	0.711647	0.933252	0.893588	0.67425	0.72003	0.880308
6	rs115800128	0	30147987	C	A	1954	rs115800128_C	12248.3	12250.3	0.929785	0.745586	0.721718	0.944222	0.884255	0.664648	0.729911	0.889196
6	rs115819718	0	30148063	A	G	1955	rs115819718_A	12244.4	12245.6	0.373788	0.0795842	0.691369	0.117734	0.138282	0.17502	0.140893	0.0418094
6	rs9393989	0	30148063	A	G	1956	rs9393989_A	12244.4	12245.6	0.373788	0.0795842	0.691369	0.117734	0.138282	0.17502	0.140893	0.0418094
6	rs115146263	0	30148164	A	G	1957	rs115146263_A	12248.3	12250.3	0.944518	0.73506	0.709734	0.930877	0.895417	0.675668	0.717584	0.877276
6	rs115550514	0	30148270	A	G	1958	rs115550514_A	12244.2	12245.3	0.361148	0.0763717	0.673172	0.114017	0.132127	0.167351	0.135526	0.0399621
6	rs116533454	0	30148376	A	G	1959	rs116533454_A	12248.3	12250.3	0.979142	0.695602	0.69333	0.703187	0.620404	0.650279	0.474882	0.415769
6	rs115441264	0	30148582	A	G	1960	rs115441264_A	12248.3	12249.5	0.35259	0.0737209	0.663585	0.110294	0.127426	0.161878	0.132109	0.0384511
6	rs116518960	0	30148789	C	A	1961	rs116518960_C	12247.8	12249.8	0.893118	0.781468	0.755565	0.975587	0.850207	0.635823	0.758533	0.920494
6	rs115437588	0	30148988	G	A	1962	rs115437588_G	12248.3	12250.3	0.944518	0.73506	0.709734	0.930877	0.895417	0.675668	0.717584	0.877276
6	rs2074479	0	30148988	G	A	1963	rs2074479_G	12248.3	12250.3	0.944518	0.73506	0.709734	0.930877	0.895417	0.675668	0.717584	0.877276
6	rs115631878	0	30149015	A	G	1964	rs115631878_A	12248.3	12249.8	0.465957	0.399925	0.818709	0.809211	0.590935	0.556226	0.691769	0.695506
6	rs114578400	0	30149488	A	G	1965	rs114578400_A	12248	12249.1	0.330684	0.113068	0.279524	0.317243	0.499145	0.668847	0.302504	0.292549
6	rs115454480	0	30149538	G	A	1966	rs115454480_G	12245.2	12246.6	0.419322	0.14305	0.733135	0.296415	0.42768	0.102223	0.452738	0.386651
6	rs9261301	0	30149538	G	A	1967	rs9261301_G	12244.4	12245.7	0.416938	0.141512	0.737535	0.294498	0.424387	0.10107	0.449271	0.383443
6	rs116010480	0	30150188	A	C	1968	rs116010480_A	12244.9	12244.1	0.0922895	3.95999e-05	0.99937	0.00952152	0.204294	0.0910149	0.05905	0.108726
6	rs116208718	0	30150328	A	G	1969	rs116208718_A	12248.3	12250.3	0.923844	0.75304	0.730241	0.951294	0.872538	0.654391	0.737403	0.899588
6	rs114899566	0	30150495	G	A	1970	rs114899566_G	12248.3	12249.6	0.38472	0.580081	0.170485	0.63298	0.00831844	0.0313017	0.53491	0.588701
6	rs115673004	0	30150647	G	A	1971	rs115673004_G	12203.4	12204.6	0.368322	0.346082	0.724957	0.492275	0.533553	0.459105	0.75754	0.53374
6	rs114057639	0	30150840	C	G	1972	rs114057639_C	12248.3	12249.5	0.353859	0.125687	0.297572	0.333945	0.519504	0.692793	0.318219	0.308196
6	rs2285805	0	30150840	C	G	1973	rs2285805_C	12248.3	12249.5	0.353859	0.125687	0.297572	0.333945	0.519504	0.692793	0.318219	0.308196
6	rs115163487	0	30150934	A	G	1974	rs115163487_A	12245.4	12246.7	0.393588	0.0134233	0.836947	0.131459	0.484928	0.287211	0.297358	0.295163
6	rs114131484	0	30151465	G	A	1975	rs114131484_G	12248.3	12248.9	0.225192	0.03311	0.199227	0.199569	0.384257	0.526923	0.169045	0.19353
6	rs115797047	0	30151758	C	G	1976	rs115797047_C	12248	12248.1	0.16899	0.101611	0.0751516	0.242251	0.0281183	0.0869774	0.204344	0.217622
6	rs116299029	0	30151934	A	G	1977	rs116299029_A	12247.1	12247.5	0.212989	0.120535	0.103002	0.302148	0.0402724	0.117868	0.251496	0.263287
6	rs3807033	0	30151934	A	G	1978	rs3807033_A	12248.3	12248.8	0.210751	0.118229	0.102066	0.299947	0.0398263	0.117027	0.249854	0.261714
6	rs115512255	0	30151971	G	A	1979	rs115512255_G	12248.3	12250.2	0.785241	0.621399	0.346573	0.810063	0.267037	0.526154	0.568481	0.727016
6	rs115296416	0	30152228	A	C	1980	rs115296416_A	12248.3	12248.9	0.230344	0.130025	0.111545	0.321372	0.0447184	0.129087	0.267065	0.278754
6	rs114188496	0	30152367	C	G	1981	rs114188496_C	12248.3	12249.5	0.374834	0.100619	0.798805	0.100798	0.622258	0.166284	0.23346	0.0770014
6	rs114798492	0	30152806	A	G	1982	rs114798492_A	12248.3	12250.2	0.769375	0.611414	0.351858	0.80936	0.274558	0.543344	0.577845	0.739432
6	rs3807035	0	30152806	A	G	1983	rs3807035_A	12248.3	12250.2	0.769375	0.611414	0.351858	0.80936	0.274558	0.543344	0.577845	0.739432
6	rs116522833	0	30152893	A	G	1984	rs116522833_A	12247.9	12248.5	0.232448	0.212844	0.498212	0.316222	0.338505	0.273674	0.523663	0.334207
6	rs3807036	0	30152893	A	G	1985	rs3807036_A	12248	12248.6	0.232584	0.212954	0.498419	0.316358	0.338495	0.273664	0.52372	0.334152
6	rs116203264	0	30152965	A	G	1986	rs116203264_A	12248.3	12249.3	0.308058	0.0690841	0.494701	0.100078	0.0974786	0.102652	0.0937071	0.0236323
6	rs115631432	0	30153178	A	G	1987	rs115631432_A	12248.3	12249.8	0.471561	0.0305838	0.955578	0.116192	0.516402	0.337502	0.282062	0.145319
6	rs1150735	0	30153178	A	G	1988	rs1150735_A	12247.7	12249.2	0.467419	0.030032	0.960453	0.114452	0.511811	0.333422	0.278783	0.142958
6	rs115049602	0	30153376	G	A	1989	rs115049602_G	12248.3	12249.9	0.530263	0.527412	0.291222	0.308605	0.290509	0.22545	0.251096	0.187313
6	rs114005297	0	30153470	G	A	1990	rs114005297_G	12248.3	12248.7	0.207906	0.13947	0.254242	0.125497	0.285858	0.397075	0.125762	0.162722
6	rs114076521	0	30153474	G	A	1991	rs114076521_G	12248.3	12248.9	0.235428	0.15691	0.285568	0.143455	0.318117	0.435648	0.143319	0.184459
6	rs114616477	0	30153689	G	A	1992	rs114616477_G	12248.3	12245.7	0.0318467	0.342494	0.02903	0.0381095	0.010542	0.00278626	0.00567954	0.00632821
6	rs116208055	0	30153710	G	A	1993	rs116208055_G	12247.8	12249.1	0.394765	0.247678	0.169092	0.351363	0.136482	0.345677	0.223419	0.342686
6	rs115199282	0	30153825	A	G	1994	rs115199282_A	12246.8	12248.1	0.408775	0.257752	0.176174	0.364051	0.142058	0.356977	0.232227	0.354474
6	rs115416863	0	30153861	A	C	1995	rs115416863_A	12248.3	12248.9	0.235428	0.15691	0.285568	0.143455	0.318117	0.435648	0.143319	0.184459
6	rs114091685	0	30153937	G	A	1996	rs114091685_G	12248.3	12249.5	0.378768	0.237262	0.160212	0.336625	0.12892	0.330451	0.211707	0.326686
6	rs115308766	0	30153990	A	G	1997	rs115308766_A	12248.3	12248.9	0.228993	0.130125	0.111041	0.319183	0.0448022	0.128446	0.266462	0.279199
6	rs114249597	0	30154225	A	G	1998	rs114249597_A	12248.3	12249.6	0.403294	0.255402	0.173956	0.359947	0.14005	0.352128	0.229808	0.35159
6	rs2394734	0	30154225	A	G	1999	rs2394734_A	12248.3	12249.6	0.398043	0.250606	0.170418	0.353603	0.137486	0.347709	0.224967	0.344695
[truncated: 5,854 more rows]
